# Supplementary material for: Ribosome subunit attrition and activation of the p53–MDM4 axis dominate the response of MLL-rearranged cancer cells to WDR5 WIN site inhibition
Source: PubMed Central journal article supplement (PMC11057873; doi:10.7554/elife.90683), 2024-04-29

Figure 6—source data 5

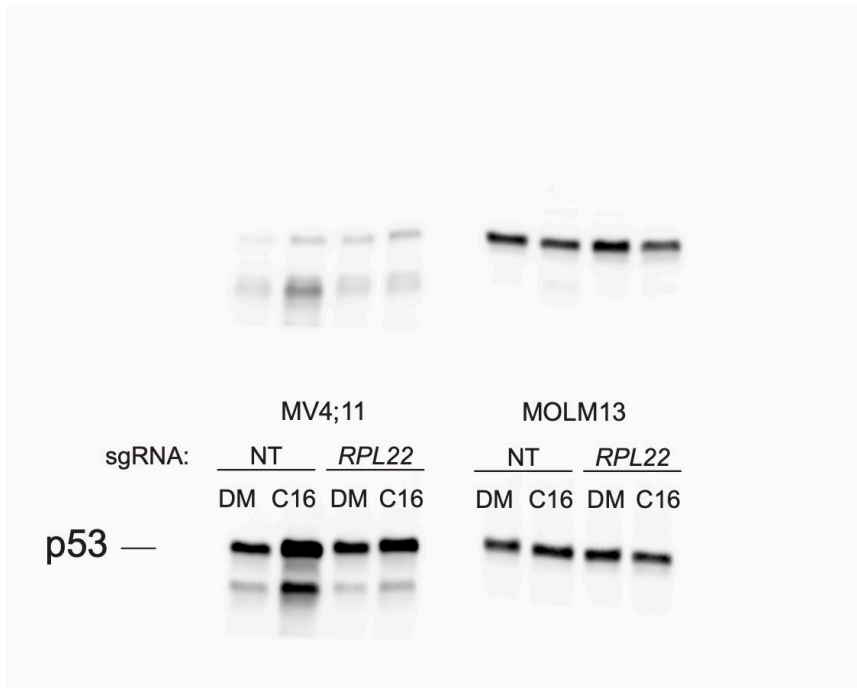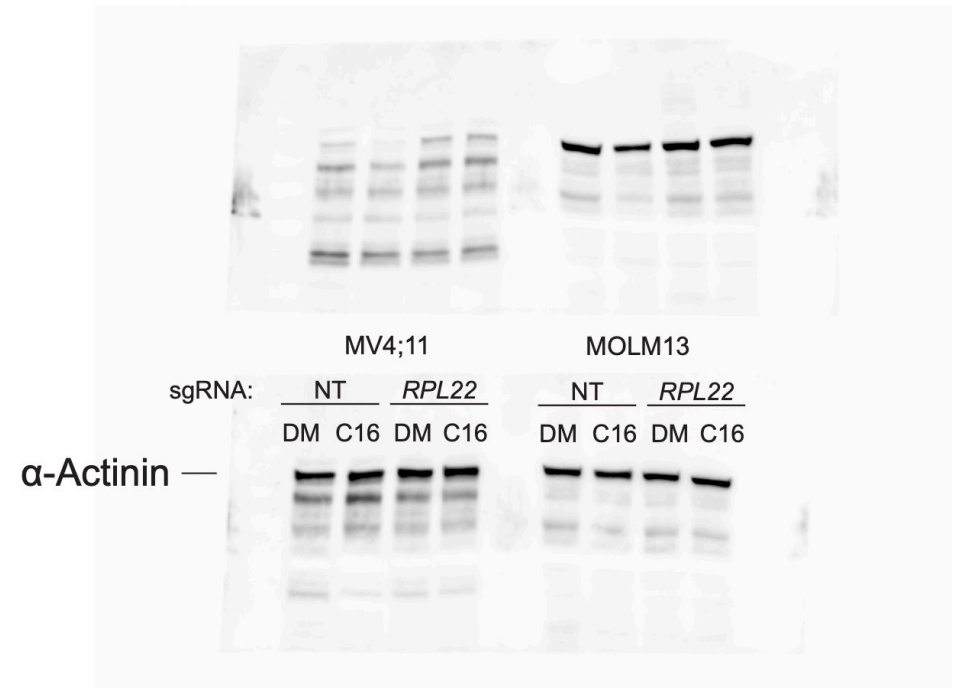

Supplement: elife-90683-fig6-data5.pdf [file elife-90683-fig6-data5.pdf]
