# Supplementary material for: Ribosome subunit attrition and activation of the p53–MDM4 axis dominate the response of MLL-rearranged cancer cells to WDR5 WIN site inhibition
Source: eLife. 2024 Apr 29;12:RP90683. doi: 10.7554/eLife.90683 (PMC11057873; doi:10.7554/eLife.90683)
Supplement: Figure 2—source data 1. [file elife-90683-fig2-data1.xlsx]

## Sheet: C6vsDMSO
Feature	Feature_gene_name	mRNA_log2FC	RPF_log2FC	log2FC_TE	FDR
ENSG00000122862.4	SRGN	0.248854	-0.400777	-0.649498	0
ENSG00000115053.11	NCL	0.0730124	-0.868275	-0.941503	8.12247e-294
ENSG00000153187.12	HNRNPU	0.121442	-0.768228	-0.889767	1.8152e-282
ENSG00000122566.16	HNRNPA2B1	0.0374998	-0.918404	-0.956216	2.9625e-265
ENSG00000253729.3	PRKDC	-0.08601	-0.926118	-0.840408	1.49088e-241
ENSG00000090382.2	LYZ	0.450292	-0.303464	-0.753722	2.45642e-176
ENSG00000179218.9	CALR	-0.310701	-1.06761	-0.757307	9.5843e-143
ENSG00000169710.6	FASN	-0.260342	-0.937045	-0.6768	2.17203e-142
ENSG00000196415.5	PRTN3	-0.254512	-0.858151	-0.603698	3.67188e-138
ENSG00000074800.9	ENO1	-0.189775	-0.616591	-0.426733	3.92541e-136
ENSG00000080824.14	HSP90AA1	-0.069879	-0.930486	-0.860983	2.09795e-134
ENSG00000127022.10	CANX	-0.0828552	-0.897766	-0.815074	1.23138e-133
ENSG00000131747.10	TOP2A	-0.0878074	-1.15874	-1.07131	4.2071e-130
ENSG00000107581.8	EIF3A	0.0968829	-0.961526	-1.05862	3.97515e-129
ENSG00000116560.6	SFPQ	0.0685824	-0.93023	-0.999213	1.10007e-127
ENSG00000185624.10	P4HB	-0.163856	-0.697949	-0.534303	1.2161e-123
ENSG00000174231.12	PRPF8	-0.00614801	-0.677908	-0.671726	5.73953e-123
ENSG00000089280.14	FUS	-0.0580115	-0.751454	-0.693407	1.04405e-119
ENSG00000167978.12	SRRM2	-0.00627611	-0.803739	-0.797675	6.40721e-117
ENSG00000166710.13	B2M	0.209954	-0.650046	-0.860322	1.28565e-115
ENSG00000124942.9	AHNAK	0.63635	-0.0723289	-0.708835	9.37465e-114
ENSG00000110955.4	ATP5B	0.0977502	-0.46471	-0.562329	1.93115e-111
ENSG00000136167.9	LCP1	0.00715902	-0.655813	-0.663264	2.06575e-110
ENSG00000005844.13	ITGAL	0.0793954	-0.476165	-0.555654	2.93214e-107
ENSG00000079246.11	XRCC5	0.0291942	-0.749311	-0.778576	3.46212e-106
ENSG00000169045.13	HNRNPH1	0.081853	-0.847814	-0.929828	1.63746e-101
ENSG00000100345.16	MYH9	0.0503012	-0.508402	-0.558842	1.49365e-100
ENSG00000152234.11	ATP5A1	0.0696974	-0.61127	-0.68117	5.11845e-100
ENSG00000072274.8	TFRC	-0.259253	-0.992796	-0.733601	9.08684e-96
ENSG00000149925.12	ALDOA	-0.11676	-0.491089	-0.374451	2.06675e-95
ENSG00000184357.3	HIST1H1B	-0.314931	-0.783978	-0.469215	1.23216e-92
ENSG00000197471.7	SPN	-0.0284535	-0.692833	-0.664366	2.15501e-92
ENSG00000096384.15	HSP90AB1	-0.0957157	-0.745427	-0.649846	2.77161e-92
ENSG00000141367.7	CLTC	0.0432572	-0.631908	-0.675161	6.28702e-92
ENSG00000166598.8	HSP90B1	-0.0727507	-0.889907	-0.817553	8.98584e-91
ENSG00000167658.11	EEF2	-0.815199	-1.18225	-0.367086	1.00325e-87
ENSG00000099783.7	HNRNPM	-0.0972858	-0.826298	-0.729244	4.74394e-84
ENSG00000135387.15	CAPRIN1	0.0304307	-0.797464	-0.828177	3.86447e-83
ENSG00000124693.2	HIST1H3B	-0.331413	-0.827619	-0.496431	4.67943e-83
ENSG00000051523.6	CYBA	0.142234	-0.528578	-0.671136	4.7958e-83
ENSG00000158406.2	HIST1H4H	-0.288116	-0.918983	-0.630886	7.5312e-83
ENSG00000121691.4	CAT	0.116475	-0.599462	-0.716299	2.49973e-81
ENSG00000109971.9	HSPA8	-0.289372	-0.864745	-0.575419	1.75436e-80
ENSG00000145287.6	PLAC8	0.273005	-0.486342	-0.759663	1.41325e-78
ENSG00000009307.11	CSDE1	0.149401	-0.748275	-0.89786	1.60117e-78
ENSG00000187837.2	HIST1H1C	-0.176085	-0.68455	-0.50845	4.78442e-78
ENSG00000159140.13	SON	0.0158205	-0.798406	-0.814544	1.01553e-77
ENSG00000168298.4	HIST1H1E	-0.26545	-0.741595	-0.476309	2.57799e-77
ENSG00000198518.5	HIST1H4E	-0.169853	-0.884213	-0.714695	3.2236e-77
ENSG00000197561.2	ELANE	-0.121142	-0.902738	-0.781698	4.95382e-77
ENSG00000111716.8	LDHB	0.0369686	-0.643506	-0.680664	6.0555e-77
ENSG00000104738.12	MCM4	-0.342305	-1.01194	-0.670066	1.06967e-76
ENSG00000150753.7	CCT5	-0.0243438	-0.959553	-0.935729	2.00456e-75
ENSG00000172232.5	AZU1	-0.0425906	-0.539784	-0.497235	1.27084e-74
ENSG00000197061.3	HIST1H4C	-0.319948	-0.975884	-0.656331	4.10304e-74
ENSG00000204628.7	GNB2L1	-0.550968	-1.04594	-0.4951	4.34217e-73
ENSG00000044574.7	HSPA5	-0.354898	-1.03624	-0.681681	2.25688e-72
ENSG00000172757.8	CFL1	0.075144	-0.473931	-0.549343	1.25893e-70
ENSG00000166794.4	PPIB	0.0527874	-0.752521	-0.805549	5.79338e-69
ENSG00000143870.8	PDIA6	-0.143286	-0.987669	-0.844945	1.01907e-67
ENSG00000082898.12	XPO1	-0.0203158	-1.0605	-1.04097	7.66439e-67
ENSG00000138071.9	ACTR2	0.23129	-0.583128	-0.814924	4.15865e-66
ENSG00000105220.10	GPI	-0.107186	-0.570953	-0.463698	8.30215e-66
ENSG00000117523.11	PRRC2C	0.0986246	-0.877552	-0.976486	8.50127e-66
ENSG00000111640.10	GAPDH	-0.0437237	-0.445411	-0.401721	9.05457e-64
ENSG00000026025.9	VIM	0.212258	-0.276474	-0.488964	9.12797e-63
ENSG00000063244.8	U2AF2	-0.172831	-0.910341	-0.737738	1.40296e-62
ENSG00000015479.13	MATR3	0.0422657	-0.857015	-0.899603	1.44546e-62
ENSG00000102879.11	CORO1A	-0.00248811	-0.493852	-0.491528	1.5375e-62
ENSG00000127951.5	FGL2	0.742797	-0.183712	-0.926453	4.06785e-62
ENSG00000135829.12	DHX9	-0.0603787	-0.892105	-0.832331	4.83445e-62
ENSG00000139644.8	TMBIM6	-0.0168289	-0.718373	-0.701861	5.4442e-62
ENSG00000156261.8	CCT8	-0.0622949	-0.768018	-0.706117	6.35921e-62
ENSG00000057608.12	GDI2	0.0341345	-0.817992	-0.852379	1.27612e-61
ENSG00000146731.6	CCT6A	0.00708375	-1.06091	-1.06855	2.0388e-60
ENSG00000166340.10	TPP1	0.174919	-0.518236	-0.693363	4.15744e-60
ENSG00000130726.7	TRIM28	-0.228713	-0.719221	-0.490642	5.06049e-60
ENSG00000134333.9	LDHA	-0.101288	-0.697706	-0.596675	5.49616e-60
ENSG00000110077.10	MS4A6A	0.449698	-0.361739	-0.811433	8.6566e-60
ENSG00000011304.12	PTBP1	-0.243501	-0.800547	-0.557208	3.08651e-59
ENSG00000115524.11	SF3B1	0.0993875	-0.554642	-0.654389	8.8422e-59
ENSG00000132646.6	PCNA	0.0222914	-0.741034	-0.763436	1.3757e-58
ENSG00000137076.14	TLN1	-0.0644927	-0.607255	-0.5429	2.32156e-56
ENSG00000127603.19	MACF1	0.164285	-0.734266	-0.899103	2.48927e-56
ENSG00000070756.9	PABPC1	0.19165	-0.725892	-0.917903	3.95342e-56
ENSG00000161547.10	SRSF2	0.0727107	-0.639705	-0.712582	1.37231e-55
ENSG00000162511.7	LAPTM5	0.427198	-0.200992	-0.628423	1.82807e-55
ENSG00000115091.7	ACTR3	0.144767	-0.721918	-0.866997	1.07237e-54
ENSG00000125107.12	CNOT1	0.106805	-0.866955	-0.974391	7.50976e-54
ENSG00000175216.10	CKAP5	-0.0165926	-1.03395	-1.01824	9.84899e-54
ENSG00000105202.3	FBL	-0.0586514	-0.784987	-0.72651	2.11611e-53
ENSG00000135316.13	SYNCRIP	0.0798115	-1	-1.08082	3.97773e-52
ENSG00000165280.11	VCP	-0.10964	-0.768904	-0.659352	5.41516e-52
ENSG00000010244.12	ZNF207	0.0818699	-0.769246	-0.85155	5.53031e-52
ENSG00000101347.7	SAMHD1	0.611632	-0.155387	-0.766984	6.81135e-52
ENSG00000104824.12	HNRNPL	-0.0642167	-0.926751	-0.863248	1.75054e-51
ENSG00000163468.10	CCT3	-0.119946	-0.757939	-0.638247	2.22441e-51
ENSG00000197766.3	CFD	0.0649138	-0.405433	-0.470328	2.26768e-51
ENSG00000165732.8	DDX21	-0.0395331	-0.913549	-0.874835	2.85721e-51
ENSG00000089597.12	GANAB	-0.09217	-0.593034	-0.501101	3.3789e-51
ENSG00000197111.11	PCBP2	0.0867551	-0.591181	-0.678027	3.66967e-51
ENSG00000136997.10	MYC	0.0539762	-0.51817	-0.572351	3.70039e-51
ENSG00000196532.4	HIST1H3C	-0.268317	-0.746197	-0.477887	4.07239e-51
ENSG00000108561.4	C1QBP	-0.0260549	-0.75525	-0.729315	1.0085e-50
ENSG00000139218.13	SCAF11	0.197076	-0.876097	-1.07384	1.32835e-50
ENSG00000138095.14	LRPPRC	0.197944	-0.468239	-0.666247	1.76939e-50
ENSG00000144028.10	SNRNP200	-0.0415778	-0.725513	-0.684366	2.90867e-50
ENSG00000148773.8	MKI67	-0.259593	-1.01663	-0.7575	5.2819e-50
ENSG00000124207.12	CSE1L	-0.110159	-1.0032	-0.893554	7.86607e-50
ENSG00000134900.7	TPP2	0.155071	-0.936305	-1.09229	9.69721e-50
ENSG00000164754.8	RAD21	-0.13451	-0.966119	-0.832432	1.43609e-49
ENSG00000183283.11	DAZAP2	0.164038	-0.633768	-0.798229	1.54676e-49
ENSG00000075415.8	SLC25A3	0.0179708	-0.595933	-0.614036	6.72617e-49
ENSG00000164919.6	COX6C	0.140176	-0.887758	-1.02873	1.12876e-48
ENSG00000110321.11	EIF4G2	0.107989	-0.665279	-0.77342	1.15969e-48
ENSG00000172270.14	BSG	-0.0010761	-0.406289	-0.405423	1.63981e-48
ENSG00000136628.13	EPRS	0.00718007	-0.770518	-0.778231	1.74086e-48
ENSG00000113013.8	HSPA9	-0.0593221	-0.731413	-0.672416	4.96656e-48
ENSG00000140968.6	IRF8	0.148641	-0.487925	-0.636711	4.96668e-48
ENSG00000100823.7	APEX1	0.0391618	-0.648989	-0.688289	5.30606e-48
ENSG00000138668.14	HNRNPD	-0.000405374	-0.713552	-0.71346	9.14996e-48
ENSG00000100201.14	DDX17	0.215457	-0.441637	-0.65723	1.23926e-47
ENSG00000113368.7	LMNB1	-0.325907	-0.920859	-0.595136	1.23926e-47
ENSG00000147065.12	MSN	-0.136297	-0.646665	-0.510655	1.84142e-47
ENSG00000168066.16	SF1	-0.127028	-0.926419	-0.799983	3.27589e-47
ENSG00000144381.12	HSPD1	-0.0596313	-0.867785	-0.808898	3.28189e-47
ENSG00000105472.8	CLEC11A	-0.052154	-0.423269	-0.371115	3.88054e-47
ENSG00000133706.13	LARS	0.0846512	-0.752419	-0.837752	6.49938e-47
ENSG00000129351.13	ILF3	-0.142638	-0.772589	-0.630199	6.49938e-47
ENSG00000196591.7	HDAC2	0.0434153	-0.965024	-1.00952	7.24566e-47
ENSG00000067225.13	PKM	-0.0795485	-0.540226	-0.460834	1.1973e-46
ENSG00000117724.8	CENPF	-0.042055	-0.891475	-0.850195	1.26522e-46
ENSG00000131504.11	DIAPH1	-0.100425	-0.982926	-0.883319	2.16807e-46
ENSG00000112081.12	SRSF3	0.000243278	-0.883424	-0.884046	2.40837e-46
ENSG00000079459.8	FDFT1	-0.125647	-0.71256	-0.587028	2.70048e-46
ENSG00000145907.10	G3BP1	0.0423762	-0.796822	-0.839896	2.99292e-46
ENSG00000197153.3	HIST1H3J	-0.271198	-0.876449	-0.605696	4.22038e-46
ENSG00000113648.12	H2AFY	0.0328473	-0.615014	-0.648118	4.57764e-46
ENSG00000117632.16	STMN1	-0.130336	-0.760388	-0.630329	5.00327e-46
ENSG00000126247.6	CAPNS1	0.0873226	-0.558116	-0.645796	1.78901e-45
ENSG00000215301.5	DDX3X	0.100137	-0.779767	-0.880458	2.16566e-45
ENSG00000005893.11	LAMP2	0.22422	-0.559772	-0.784526	2.52591e-45
ENSG00000084234.12	APLP2	0.124614	-0.538032	-0.662767	3.0264e-45
ENSG00000140740.6	UQCRC2	0.192127	-0.605649	-0.798411	3.25532e-45
ENSG00000125304.8	TM9SF2	0.205904	-0.553673	-0.760082	1.15838e-44
ENSG00000132182.7	NUP210	-0.0644798	-0.680407	-0.616083	1.95657e-44
ENSG00000123338.8	NCKAP1L	0.26579	-0.365049	-0.630971	1.54655e-43
ENSG00000197459.2	HIST1H2BH	-0.29708	-1.03155	-0.734863	1.79301e-43
ENSG00000070214.11	SLC44A1	0.223484	-0.447945	-0.671837	2.68537e-43
ENSG00000106263.13	EIF3B	-0.0188856	-0.759318	-0.740645	6.43665e-43
ENSG00000168274.3	HIST1H2AE	-0.315942	-0.874594	-0.558722	6.76955e-43
ENSG00000076003.4	MCM6	-0.402098	-1.12584	-0.724355	6.92811e-43
ENSG00000143669.9	LYST	0.288844	-0.648193	-0.937833	7.02785e-43
ENSG00000010292.8	NCAPD2	-0.270584	-1.05004	-0.779861	1.20961e-42
ENSG00000120690.9	ELF1	0.0420947	-0.710352	-0.752847	3.74168e-42
ENSG00000104904.8	OAZ1	0.00859787	-0.701489	-0.710321	4.38523e-42
ENSG00000111348.4	ARHGDIB	0.232972	-0.285647	-0.518628	4.54302e-42
ENSG00000163399.11	ATP1A1	-0.0765776	-0.732537	-0.656329	5.69107e-42
ENSG00000169554.12	ZEB2	0.238323	-0.700745	-0.939985	6.8607e-42
ENSG00000112697.11	TMEM30A	0.63383	-0.19878	-0.832583	8.09496e-42
ENSG00000104408.5	EIF3E	-0.0426685	-0.717545	-0.67512	8.53727e-42
ENSG00000092964.12	DPYSL2	0.153032	-0.380587	-0.53366	1.38213e-41
ENSG00000120694.15	HSPH1	-0.202258	-1.1305	-0.929214	1.43506e-41
ENSG00000109606.8	DHX15	0.0271976	-0.756842	-0.784636	1.56405e-41
ENSG00000152795.13	HNRNPDL	-0.0877093	-1.03047	-0.943629	2.35905e-41
ENSG00000137154.8	RPS6	-0.412247	-1.06069	-0.648987	3.62353e-41
ENSG00000165672.5	PRDX3	0.0320569	-0.669472	-0.701969	4.17831e-41
ENSG00000166226.8	CCT2	-0.126145	-0.745517	-0.619833	4.17831e-41
ENSG00000180353.6	HCLS1	0.231035	-0.51623	-0.747607	5.86991e-41
ENSG00000196419.8	XRCC6	-0.147533	-0.903595	-0.756371	1.04682e-40
ENSG00000104852.10	SNRNP70	0.087557	-0.80789	-0.896198	1.2453e-40
ENSG00000113810.11	SMC4	-0.0840184	-0.897661	-0.814293	1.26083e-40
ENSG00000072110.9	ACTN1	-0.0773504	-0.677259	-0.600049	2.98663e-40
ENSG00000115875.14	SRSF7	-0.0618092	-0.809585	-0.748229	3.13369e-40
ENSG00000183207.8	RUVBL2	-0.167381	-0.794251	-0.627073	3.23107e-40
ENSG00000121774.13	KHDRBS1	-0.0737284	-0.788372	-0.715152	4.00379e-40
ENSG00000077097.9	TOP2B	0.249373	-0.570748	-0.820688	5.1135e-40
ENSG00000168036.12	CTNNB1	-0.0350031	-0.682688	-0.6482	5.92836e-40
ENSG00000113161.11	HMGCR	-0.179378	-0.966018	-0.787236	6.71137e-40
ENSG00000088247.11	KHSRP	-0.199295	-0.889296	-0.690537	8.17282e-40
ENSG00000039123.11	SKIV2L2	0.12886	-0.866578	-0.996326	8.40278e-40
ENSG00000163902.7	RPN1	-0.144243	-0.736	-0.591841	9.794e-40
ENSG00000111642.10	CHD4	-0.0903691	-0.770963	-0.680911	1.09619e-39
ENSG00000154518.5	ATP5G3	-0.0377047	-0.748743	-0.711438	2.12324e-39
ENSG00000221983.3	UBA52	0.0175744	-0.418932	-0.436794	2.43821e-39
ENSG00000196531.6	NACA	-0.293768	-1.28457	-0.992176	3.69679e-39
ENSG00000255302.3	EID1	0.313569	-0.665581	-0.979733	4.6873e-39
ENSG00000086061.11	DNAJA1	0.00652855	-0.930958	-0.938217	6.74742e-39
ENSG00000019582.10	CD74	0.410864	-0.0946207	-0.50542	8.51949e-39
ENSG00000047410.9	TPR	0.109352	-0.659331	-0.769112	1.6128e-38
ENSG00000110090.8	CPT1A	0.134658	-0.764596	-0.899726	1.62141e-38
ENSG00000152601.13	MBNL1	0.19449	-0.646074	-0.841195	1.70544e-38
ENSG00000158864.8	NDUFS2	0.114895	-0.658594	-0.773952	2.72193e-38
ENSG00000166508.13	MCM7	-0.487981	-1.0027	-0.515215	2.72193e-38
ENSG00000140575.8	IQGAP1	0.130466	-0.638642	-0.76947	3.58716e-38
ENSG00000115760.9	BIRC6	0.145198	-0.817261	-0.963289	3.9167e-38
ENSG00000138757.10	G3BP2	0.00269569	-0.992166	-0.995614	3.92487e-38
ENSG00000069275.12	NUCKS1	-0.0216295	-0.957355	-0.936751	5.02616e-38
ENSG00000156802.8	ATAD2	-0.254197	-1.1689	-0.915688	5.7268e-38
ENSG00000161016.11	RPL8	-0.63032	-1.07937	-0.449489	6.01412e-38
ENSG00000147677.6	EIF3H	-0.00442377	-0.656404	-0.652273	6.41968e-38
ENSG00000169564.5	PCBP1	-0.0594968	-0.666907	-0.607778	6.65331e-38
ENSG00000130402.7	ACTN4	-0.0616132	-0.571272	-0.509642	9.17805e-38
ENSG00000203813.4	HIST1H3H	-0.469144	-0.891793	-0.422823	1.1649e-37
ENSG00000136450.8	SRSF1	-0.0796639	-0.841998	-0.763069	1.27804e-37
ENSG00000101439.4	CST3	0.427816	-0.10204	-0.530027	3.99882e-37
ENSG00000104853.11	CLPTM1	-0.0285734	-0.980437	-0.952989	4.29098e-37
ENSG00000184743.8	ATL3	0.177962	-0.918316	-1.09733	4.80237e-37
ENSG00000197409.6	HIST1H3D	-0.467421	-0.984806	-0.517607	4.80237e-37
ENSG00000136536.10	MARCH7	0.309185	-0.549162	-0.859023	4.81565e-37
ENSG00000130816.10	DNMT1	-0.239763	-0.815767	-0.576521	5.17747e-37
ENSG00000084207.11	GSTP1	0.0199362	-0.561565	-0.581967	7.68793e-37
ENSG00000136527.13	TRA2B	-0.00989239	-0.802205	-0.793069	1.11506e-36
ENSG00000047315.10	POLR2B	0.0659756	-0.758992	-0.825828	1.8152e-36
ENSG00000151465.9	CDC123	0.0688987	-0.813727	-0.883168	1.9833e-36
ENSG00000118705.12	RPN2	0.0354585	-0.486326	-0.52187	2.92243e-36
ENSG00000130429.8	ARPC1B	0.0714061	-0.589175	-0.661105	4.80661e-36
ENSG00000134294.9	SLC38A2	-0.0435008	-0.985152	-0.942873	5.07995e-36
ENSG00000197846.3	HIST1H2BF	-0.172174	-0.795795	-0.624239	5.52349e-36
ENSG00000154473.13	BUB3	-0.00761112	-0.724577	-0.717457	5.75907e-36
ENSG00000108424.5	KPNB1	-0.174239	-0.816959	-0.643178	6.26934e-36
ENSG00000142676.8	RPL11	-0.632924	-1.22325	-0.590896	8.13747e-36
ENSG00000029363.11	BCLAF1	0.135644	-0.860597	-0.997274	8.68635e-36
ENSG00000134910.8	STT3A	-0.149012	-0.755781	-0.607156	1.00858e-35
ENSG00000105281.8	SLC1A5	-0.27826	-0.805895	-0.527803	1.09256e-35
ENSG00000134440.7	NARS	0.0282526	-0.837632	-0.866429	1.3832e-35
ENSG00000125835.13	SNRPB	-0.909075	-1.74761	-0.839822	1.41287e-35
ENSG00000089737.11	DDX24	-0.0106489	-0.822213	-0.812244	3.01857e-35
ENSG00000117450.9	PRDX1	0.0784841	-0.625511	-0.704441	3.28579e-35
ENSG00000132780.12	NASP	-0.0847945	-0.88976	-0.80542	5.02895e-35
ENSG00000100632.6	ERH	0.0223072	-0.788307	-0.811376	9.79127e-35
ENSG00000149136.3	SSRP1	-0.192144	-0.909234	-0.717879	9.97997e-35
ENSG00000129003.11	VPS13C	0.414001	-0.583212	-0.997598	1.17737e-34
ENSG00000158417.6	EIF5B	0.135662	-0.853451	-0.989773	1.31856e-34
ENSG00000128708.8	HAT1	-0.217998	-1.12276	-0.905881	1.79481e-34
ENSG00000188987.2	HIST1H4D	-0.398941	-1.00421	-0.605524	2.39446e-34
ENSG00000092148.8	HECTD1	0.149668	-1.22767	-1.38023	2.58529e-34
ENSG00000134987.7	WDR36	0.0607282	-1.26783	-1.33134	2.72519e-34
ENSG00000181222.10	POLR2A	0.0546601	-0.503055	-0.558136	4.44644e-34
ENSG00000122025.10	FLT3	0.105056	-0.619105	-0.724629	4.46706e-34
ENSG00000197771.8	MCMBP	0.0164615	-0.779679	-0.79697	6.23049e-34
ENSG00000143815.10	LBR	-0.00487732	-0.943416	-0.939571	7.83033e-34
ENSG00000196305.13	IARS	-0.073268	-0.788496	-0.715729	7.83033e-34
ENSG00000168906.8	MAT2A	0.0206598	-0.801329	-0.822598	8.91309e-34
ENSG00000137462.6	TLR2	0.404204	-0.565333	-0.970418	9.71032e-34
ENSG00000149516.9	MS4A3	0.197485	-0.612557	-0.810505	1.78883e-33
ENSG00000187990.4	HIST1H2BG	-0.267536	-0.792804	-0.525573	2.08776e-33
ENSG00000153827.9	TRIP12	0.137618	-0.690588	-0.828854	2.99289e-33
ENSG00000165119.14	HNRNPK	-0.0274463	-0.6306	-0.603337	5.41575e-33
ENSG00000234745.5	HLA-B	0.309733	-0.170976	-0.480772	7.54342e-33
ENSG00000150593.11	PDCD4	0.224821	-0.60195	-0.827558	8.8266e-33
ENSG00000198805.7	PNP	0.0954225	-0.654256	-0.7501	8.95515e-33
ENSG00000108518.7	PFN1	0.0111131	-0.379536	-0.390608	9.17479e-33
ENSG00000131236.12	CAP1	0.0638168	-0.537134	-0.601139	9.59864e-33
ENSG00000138363.10	ATIC	-0.0375485	-0.875589	-0.83863	1.29639e-32
ENSG00000103342.8	GSPT1	0.000796419	-0.878693	-0.880248	1.63235e-32
ENSG00000196176.7	HIST1H4A	-0.373608	-0.948611	-0.575445	1.98963e-32
ENSG00000180573.8	HIST1H2AC	-0.260531	-0.808801	-0.548883	2.22565e-32
ENSG00000066279.12	ASPM	-0.149887	-1.21699	-1.06865	2.27038e-32
ENSG00000256316.1	HIST1H3F	-0.442658	-0.882282	-0.440011	2.35535e-32
ENSG00000120802.9	TMPO	-0.234231	-1.0902	-0.856965	2.4552e-32
ENSG00000100650.11	SRSF5	0.0951689	-0.590929	-0.686565	2.72217e-32
ENSG00000008018.8	PSMB1	0.0358907	-0.641162	-0.67749	2.81235e-32
ENSG00000167325.10	RRM1	-0.362872	-1.13987	-0.777591	2.85623e-32
ENSG00000196504.11	PRPF40A	0.12855	-0.695846	-0.824817	3.32594e-32
ENSG00000116489.8	CAPZA1	0.0883025	-0.71838	-0.80721	3.53986e-32
ENSG00000115484.10	CCT4	-0.859199	-1.52088	-0.662491	3.89981e-32
ENSG00000122218.10	COPA	0.024529	-0.662823	-0.687953	1.68524e-31
ENSG00000173473.6	SMARCC1	0.0404636	-0.756729	-0.797773	1.90917e-31
ENSG00000172531.10	PPP1CA	0.017266	-0.645585	-0.663359	2.02065e-31
ENSG00000124529.3	HIST1H4B	-0.311121	-0.889722	-0.579114	2.59449e-31
ENSG00000163527.5	STT3B	0.0110346	-0.873116	-0.884897	3.17907e-31
ENSG00000166197.12	NOLC1	-0.0255188	-0.775905	-0.751042	4.1792e-31
ENSG00000116754.9	SRSF11	0.166189	-1.03953	-1.20767	4.76084e-31
ENSG00000054118.9	THRAP3	0.0152409	-0.699266	-0.714752	4.86697e-31
ENSG00000164104.7	HMGB2	-0.172497	-0.789736	-0.617632	6.09634e-31
ENSG00000166913.8	YWHAB	0.090049	-0.657363	-0.748178	8.26296e-31
ENSG00000137845.10	ADAM10	0.222013	-0.750972	-0.974053	1.04684e-30
ENSG00000196154.7	S100A4	0.491067	-0.100476	-0.591376	1.1206e-30
ENSG00000112118.13	MCM3	-0.304181	-0.954196	-0.650452	1.61329e-30
ENSG00000120280.5	CXorf21	0.165456	-0.692314	-0.858249	1.87385e-30
ENSG00000182944.13	EWSR1	-0.0120475	-0.676416	-0.664534	3.23115e-30
ENSG00000137818.7	RPLP1	0.175414	-0.955331	-1.13267	3.2616e-30
ENSG00000125869.5	LAMP5	0.22685	-0.509446	-0.736483	4.55622e-30
ENSG00000198961.5	PJA2	0.118689	-0.90735	-1.02742	4.78559e-30
ENSG00000128951.9	DUT	-0.183637	-0.855686	-0.672621	6.25423e-30
ENSG00000132466.13	ANKRD17	0.100113	-0.704544	-0.805186	8.88814e-30
ENSG00000167986.9	DDB1	-0.00870818	-0.539141	-0.530808	1.00235e-29
ENSG00000113441.11	LNPEP	0.234755	-0.664034	-0.899661	1.19369e-29
ENSG00000060138.8	YBX3	0.13738	-0.899933	-1.03869	1.37193e-29
ENSG00000135940.2	COX5B	0.136	-0.566815	-0.703096	1.64625e-29
ENSG00000124783.8	SSR1	0.1173	-0.799218	-0.91725	1.72289e-29
ENSG00000177156.6	TALDO1	-0.0108077	-0.535105	-0.52459	1.87756e-29
ENSG00000092201.5	SUPT16H	0.0256678	-0.708791	-0.73505	2.03191e-29
ENSG00000155561.10	NUP205	-0.144092	-0.969822	-0.826754	2.26346e-29
ENSG00000118855.14	MFSD1	0.471199	-0.360747	-0.832302	2.64642e-29
ENSG00000176890.11	TYMS	-0.100791	-0.866856	-0.766887	3.10573e-29
ENSG00000105810.5	CDK6	0.109418	-0.775412	-0.885755	3.57476e-29
ENSG00000026508.12	CD44	0.133634	-0.409049	-0.543092	4.09891e-29
ENSG00000030582.12	GRN	0.19889	-0.210732	-0.409637	5.02443e-29
ENSG00000183684.6	ALYREF	-0.126343	-0.839437	-0.713859	5.14764e-29
ENSG00000119314.11	PTBP3	0.328594	-0.465798	-0.794673	5.8294e-29
ENSG00000143384.8	MCL1	-0.0328095	-1.00669	-0.975005	8.50587e-29
ENSG00000125944.14	HNRNPR	-0.123363	-0.895612	-0.772981	9.71364e-29
ENSG00000169714.12	CNBP	0.0852971	-0.590768	-0.676459	1.00178e-28
ENSG00000006125.12	AP2B1	0.141249	-0.798952	-0.941229	1.1186e-28
ENSG00000163655.11	GMPS	0.0574668	-0.785202	-0.843181	1.28164e-28
ENSG00000113407.9	TARS	-0.101126	-0.79079	-0.69037	1.38681e-28
ENSG00000087087.14	SRRT	-0.0595467	-0.813262	-0.754414	1.38765e-28
ENSG00000066044.9	ELAVL1	-0.138357	-0.950288	-0.812689	1.90672e-28
ENSG00000171490.8	RSL1D1	0.127846	-0.650666	-0.779021	1.92079e-28
ENSG00000132383.7	RPA1	-0.156916	-1.02106	-0.865165	2.49485e-28
ENSG00000078674.13	PCM1	0.14955	-0.503906	-0.653935	2.89408e-28
ENSG00000177733.4	HNRNPA0	-0.116803	-0.794139	-0.678162	2.95349e-28
ENSG00000142227.6	EMP3	0.0296124	-0.717156	-0.747151	3.40906e-28
ENSG00000124635.7	HIST1H2BJ	-0.320893	-0.918257	-0.597811	3.97983e-28
ENSG00000100567.8	PSMA3	0.00710488	-0.783589	-0.791667	4.10805e-28
ENSG00000155660.6	PDIA4	-0.372219	-1.04626	-0.674915	4.24763e-28
ENSG00000184825.4	HIST1H2AH	-0.298001	-0.904179	-0.60658	4.78051e-28
ENSG00000132842.9	AP3B1	0.182349	-0.87376	-1.05741	5.94842e-28
ENSG00000152518.5	ZFP36L2	0.122841	-0.661441	-0.785006	6.01202e-28
ENSG00000170348.4	TMED10	0.132001	-0.504175	-0.636504	6.01202e-28
ENSG00000197102.6	DYNC1H1	0.0688803	-0.45731	-0.52617	6.0191e-28
ENSG00000128050.4	PAICS	-0.225505	-0.950181	-0.725293	6.14048e-28
ENSG00000175073.7	VCPIP1	0.216066	-0.909354	-1.12725	7.52013e-28
ENSG00000169813.12	HNRNPF	-0.251152	-0.718087	-0.467276	7.64801e-28
ENSG00000108946.10	PRKAR1A	0.23866	-0.494109	-0.733364	1.21571e-27
ENSG00000187109.9	NAP1L1	0.069061	-0.861869	-0.932006	1.42608e-27
ENSG00000204120.10	GIGYF2	0.150604	-0.904201	-1.05645	2.47817e-27
ENSG00000100297.11	MCM5	-0.464264	-0.979483	-0.51569	2.53709e-27
ENSG00000084774.9	CAD	-0.145336	-0.830475	-0.685551	2.71014e-27
ENSG00000119969.10	HELLS	-0.0885336	-1.39164	-1.30621	2.76389e-27
ENSG00000108883.8	EFTUD2	-0.110007	-0.771227	-0.661568	2.89054e-27
ENSG00000134001.8	EIF2S1	0.0800666	-0.847997	-0.929036	3.21705e-27
ENSG00000198558.2	HIST1H4L	-0.387745	-1.05772	-0.670934	3.30276e-27
ENSG00000140350.11	ANP32A	0.0864	-0.698146	-0.785041	3.33778e-27
ENSG00000116062.10	MSH6	-0.182002	-1.03432	-0.853527	3.92922e-27
ENSG00000256018.1	HIST1H3G	-0.393803	-0.917195	-0.523901	3.95364e-27
ENSG00000165609.8	NUDT5	0.137963	-0.657112	-0.795699	4.34934e-27
ENSG00000075239.9	ACAT1	0.172009	-0.60921	-0.781699	4.87195e-27
ENSG00000104517.8	UBR5	0.179396	-0.624724	-0.804633	4.92068e-27
ENSG00000134697.8	GNL2	0.0829573	-0.904519	-0.988827	5.60406e-27
ENSG00000143621.12	ILF2	-0.131237	-0.768004	-0.637378	6.06378e-27
ENSG00000139697.7	SBNO1	0.143643	-0.957771	-1.10295	7.51033e-27
ENSG00000014641.13	MDH1	-0.00431943	-0.650834	-0.647111	7.71085e-27
ENSG00000126457.16	PRMT1	-0.14256	-0.649243	-0.50696	7.81752e-27
ENSG00000179115.6	FARSA	-0.152099	-0.7148	-0.562827	7.94783e-27
ENSG00000179820.11	MYADM	-0.154273	-0.629341	-0.475502	8.05215e-27
ENSG00000101182.10	PSMA7	-0.0221811	-0.83399	-0.812671	8.29434e-27
ENSG00000084623.7	EIF3I	-0.104454	-0.7198	-0.615944	8.53155e-27
ENSG00000164062.8	APEH	-0.0407837	-0.794633	-0.754433	9.55826e-27
ENSG00000143933.12	CALM2	0.122667	-0.685013	-0.80851	1.06443e-26
ENSG00000197451.6	HNRNPAB	-0.0330329	-0.702352	-0.669724	1.06499e-26
ENSG00000142534.2	RPS11	0.0491674	-0.30246	-0.351563	1.06979e-26
ENSG00000100504.12	PYGL	-0.30526	-0.898671	-0.593963	1.09523e-26
ENSG00000065150.14	IPO5	-0.139286	-0.913092	-0.774922	1.12823e-26
ENSG00000114867.15	EIF4G1	-0.399053	-0.881065	-0.482391	1.13357e-26
ENSG00000048740.13	CELF2	0.0526291	-0.624662	-0.677672	1.43284e-26
ENSG00000189091.8	SF3B3	-0.693539	-1.24906	-0.555976	1.85064e-26
ENSG00000108294.4	PSMB3	-0.0507627	-0.690551	-0.640368	1.89112e-26
ENSG00000138160.4	KIF11	-0.136203	-1.169	-1.03439	2.02111e-26
ENSG00000170248.9	PDCD6IP	0.10864	-0.674857	-0.784321	2.17836e-26
ENSG00000141030.8	COPS3	-0.0279499	-1.15826	-1.1326	2.54035e-26
ENSG00000108582.7	CPD	0.173547	-0.771638	-0.946528	2.65958e-26
ENSG00000079785.10	DDX1	0.0487092	-0.718149	-0.767646	2.82386e-26
ENSG00000143799.8	PARP1	-0.0252203	-0.673684	-0.648775	3.93566e-26
ENSG00000110713.11	NUP98	0.0195105	-0.711553	-0.73193	5.47425e-26
ENSG00000138385.11	SSB	0.0358664	-1.11464	-1.15294	5.80074e-26
ENSG00000129534.9	MIS18BP1	-0.011518	-1.01211	-1.00214	6.84549e-26
ENSG00000155380.7	SLC16A1	-0.0775739	-1.04803	-0.971658	7.64903e-26
ENSG00000113649.7	TCERG1	0.0697792	-1.02857	-1.1002	7.70067e-26
ENSG00000081189.9	MEF2C	0.123976	-0.774623	-0.89953	7.90821e-26
ENSG00000138674.12	SEC31A	0.146472	-0.594998	-0.741872	8.09013e-26
ENSG00000178741.7	COX5A	0.0560501	-0.788496	-0.845596	8.87892e-26
ENSG00000125676.15	THOC2	0.191333	-0.818161	-1.01087	1.03676e-25
ENSG00000147416.6	ATP6V1B2	0.0608375	-0.597955	-0.658993	1.31457e-25
ENSG00000139921.8	TMX1	0.187012	-0.872082	-1.06038	1.41355e-25
ENSG00000134061.4	CD180	0.272745	-0.543512	-0.816871	1.42e-25
ENSG00000130935.5	NOL11	0.00373789	-1.22239	-1.22865	1.6626e-25
ENSG00000131051.16	RBM39	-0.0228404	-0.916435	-0.894878	1.82267e-25
ENSG00000124575.5	HIST1H1D	-0.355128	-0.830075	-0.475355	1.88284e-25
ENSG00000198339.3	HIST1H4I	-0.402128	-0.957002	-0.555295	2.06247e-25
ENSG00000169223.10	LMAN2	-0.0892285	-0.815754	-0.727341	2.55852e-25
ENSG00000099194.5	SCD	-0.154642	-0.633434	-0.479156	2.5897e-25
ENSG00000068366.15	ACSL4	0.174407	-0.710172	-0.885234	2.62597e-25
ENSG00000105568.13	PPP2R1A	-0.248986	-0.752705	-0.504017	2.62597e-25
ENSG00000120438.7	TCP1	-0.0351271	-0.764111	-0.729899	2.83876e-25
ENSG00000119285.6	HEATR1	0.0484309	-0.875672	-0.925513	3.05667e-25
ENSG00000100749.3	VRK1	-0.0892856	-1.25526	-1.16867	3.19698e-25
ENSG00000198900.5	TOP1	0.139947	-0.739319	-0.879972	3.35289e-25
ENSG00000100714.11	MTHFD1	-0.207028	-0.866417	-0.660119	3.4015e-25
ENSG00000180596.7	HIST1H2BC	-0.353584	-0.873911	-0.520794	3.57374e-25
ENSG00000132485.8	ZRANB2	0.108716	-1.02091	-1.13173	3.83169e-25
ENSG00000106105.9	GARS	-0.309175	-1.05017	-0.742013	3.84067e-25
ENSG00000164134.8	NAA15	0.0990705	-0.865788	-0.966118	4.34822e-25
ENSG00000138297.9	TIMM23	2.28933	-1.03562	-3.3831	4.64342e-25
ENSG00000108055.9	SMC3	0.0472064	-0.89743	-0.946044	5.75323e-25
ENSG00000067064.6	IDI1	-0.0424895	-0.839823	-0.798467	6.30143e-25
ENSG00000123416.11	TUBA1B	-0.286104	-0.923789	-0.638538	6.3324e-25
ENSG00000112972.10	HMGCS1	-0.187911	-0.808083	-0.62074	6.43654e-25
ENSG00000060339.9	CCAR1	0.152951	-0.798188	-0.952006	7.37514e-25
ENSG00000163714.13	U2SURP	0.0539406	-0.889253	-0.944425	7.84549e-25
ENSG00000159131.12	GART	-0.0820162	-0.733164	-0.651477	8.33274e-25
ENSG00000130175.5	PRKCSH	-0.2244	-0.660182	-0.435807	8.54502e-25
ENSG00000178035.7	IMPDH2	0.0284655	-0.423069	-0.451558	8.6851e-25
ENSG00000125870.6	SNRPB2	0.0734814	-1.06461	-1.13993	9.4263e-25
ENSG00000073111.9	MCM2	-0.464127	-0.943416	-0.47978	1.12457e-24
ENSG00000129128.8	SPCS3	0.0157538	-1.10962	-1.12725	1.22824e-24
ENSG00000108256.4	NUFIP2	0.292881	-0.692945	-0.987196	1.28032e-24
ENSG00000171940.9	ZNF217	0.18069	-0.662394	-0.844149	1.29382e-24
ENSG00000196235.9	SUPT5H	0.00507977	-0.664357	-0.669812	1.32352e-24
ENSG00000153147.5	SMARCA5	0.151329	-0.694985	-0.847085	1.36452e-24
ENSG00000197081.8	IGF2R	0.102618	-0.500829	-0.60366	1.40199e-24
ENSG00000182568.12	SATB1	0.135028	-0.490712	-0.626106	1.54851e-24
ENSG00000155506.12	LARP1	-0.0524774	-0.87647	-0.82476	1.70053e-24
ENSG00000133226.12	SRRM1	0.0665274	-0.755661	-0.823278	1.81296e-24
ENSG00000115956.9	PLEK	-0.048669	-0.649604	-0.601137	2.01762e-24
ENSG00000008869.7	HEATR5B	0.294774	-1.02148	-1.31931	2.29901e-24
ENSG00000088930.6	XRN2	0.0706941	-0.681269	-0.752432	2.43161e-24
ENSG00000136156.8	ITM2B	0.189339	-0.555103	-0.745129	2.69974e-24
ENSG00000180370.6	PAK2	0.196844	-0.622	-0.819848	2.80977e-24
ENSG00000138777.15	PPA2	0.16194	-0.73571	-0.898715	3.25298e-24
ENSG00000111897.6	SERINC1	0.1717	-0.733113	-0.906002	3.41151e-24
ENSG00000151503.8	NCAPD3	-0.24952	-1.1563	-0.908189	3.95173e-24
ENSG00000164032.7	H2AFZ	-0.226988	-0.994875	-0.768741	4.12955e-24
ENSG00000143569.14	UBAP2L	0.0427472	-0.571906	-0.614869	4.99748e-24
ENSG00000071127.12	WDR1	0.0582911	-0.452867	-0.511212	5.78597e-24
ENSG00000177885.9	GRB2	0.136978	-0.684026	-0.821971	5.80227e-24
ENSG00000088812.13	ATRN	0.247934	-0.419903	-0.668236	6.19709e-24
ENSG00000055044.6	NOP58	0.0565185	-0.895942	-0.953973	6.28769e-24
ENSG00000162521.14	RBBP4	0.003458	-0.875057	-0.87987	6.86319e-24
ENSG00000113282.9	CLINT1	0.140427	-0.751256	-0.892696	7.05692e-24
ENSG00000076944.10	STXBP2	0.156394	-0.476348	-0.633225	8.88031e-24
ENSG00000100219.12	XBP1	-0.217787	-1.0716	-0.854885	8.9705e-24
ENSG00000100353.13	EIF3D	-0.405958	-1.01671	-0.611283	9.10492e-24
ENSG00000166428.8	PLD4	0.198848	-0.316231	-0.51541	9.59132e-24
ENSG00000162704.11	ARPC5	0.271048	-0.539602	-0.811519	1.03845e-23
ENSG00000011426.6	ANLN	-0.0901283	-1.05035	-0.962078	1.05163e-23
ENSG00000174780.11	SRP72	0.0759215	-0.925999	-1.00333	1.09544e-23
ENSG00000197157.6	SND1	-0.112012	-0.586622	-0.474988	1.11468e-23
ENSG00000101608.8	MYL12A	0.304163	-0.338734	-0.643368	1.14175e-23
ENSG00000139687.9	RB1	0.102988	-0.95109	-1.05569	1.2877e-23
ENSG00000164944.7	KIAA1429	-0.0440552	-0.903998	-0.861009	1.37968e-23
ENSG00000111530.8	CAND1	-0.0228785	-0.861346	-0.83966	1.49939e-23
ENSG00000086758.11	HUWE1	-0.0280532	-0.643651	-0.615977	1.52886e-23
ENSG00000177663.9	IL17RA	-0.0873304	-0.749056	-0.662518	1.80806e-23
ENSG00000136436.10	CALCOCO2	0.187381	-0.618437	-0.806837	1.84767e-23
ENSG00000112992.12	NNT	0.131223	-0.548407	-0.680084	2.16627e-23
ENSG00000148154.5	UGCG	0.121388	-0.509861	-0.631475	2.24869e-23
ENSG00000121807.5	CCR2	0.331766	-0.462879	-0.794969	2.25077e-23
ENSG00000123136.10	DDX39A	-0.273985	-0.811957	-0.538257	2.42779e-23
ENSG00000174197.12	MGA	0.228867	-0.864052	-1.09477	2.52771e-23
ENSG00000175792.7	RUVBL1	-0.0583761	-0.974269	-0.917483	2.59989e-23
ENSG00000145833.11	DDX46	0.0270113	-0.932516	-0.960625	2.63118e-23
ENSG00000089248.6	ERP29	0.083504	-0.544148	-0.628109	2.77383e-23
ENSG00000069329.11	VPS35	0.028216	-0.74366	-0.772932	2.94443e-23
ENSG00000119596.13	YLPM1	0.059572	-0.949854	-1.01139	3.27548e-23
ENSG00000162613.12	FUBP1	-0.0833634	-0.870321	-0.787591	3.27888e-23
ENSG00000198668.6	CALM1	0.164469	-0.850944	-1.01675	3.54137e-23
ENSG00000110367.7	DDX6	-0.032871	-0.966141	-0.934698	3.57909e-23
ENSG00000138182.10	KIF20B	-0.0939705	-1.20759	-1.1158	3.66576e-23
ENSG00000099995.14	SF3A1	-0.106646	-0.731939	-0.626053	3.71006e-23
ENSG00000105323.12	HNRNPUL1	-0.128266	-0.658887	-0.531081	3.95825e-23
ENSG00000117713.13	ARID1A	-0.0206459	-0.706884	-0.686993	4.02498e-23
ENSG00000096746.13	HNRNPH3	0.0495614	-0.883903	-0.934724	4.12898e-23
ENSG00000070081.11	NUCB2	-0.190838	-0.827772	-0.637399	4.21561e-23
ENSG00000151883.12	PARP8	0.1981	-0.52641	-0.724796	5.06758e-23
ENSG00000178982.5	EIF3K	-0.0330069	-0.55141	-0.518604	5.53732e-23
ENSG00000143401.10	ANP32E	0.188101	-0.941504	-1.13167	6.02604e-23
ENSG00000183431.7	SF3A3	-0.0767105	-1.04541	-0.970022	6.26233e-23
ENSG00000023228.9	NDUFS1	0.0920927	-0.569146	-0.661865	6.58101e-23
ENSG00000100448.3	CTSG	-0.374424	-1.03882	-0.66496	7.10654e-23
ENSG00000179271.1	GADD45GIP1	0.0942694	-0.722953	-0.818268	7.25947e-23
ENSG00000131828.9	PDHA1	0.0761498	-0.733791	-0.810478	8.62989e-23
ENSG00000118513.14	MYB	0.0530464	-0.555215	-0.608907	1.06141e-22
ENSG00000196787.2	HIST1H2AG	-0.281602	-0.842663	-0.561385	1.06141e-22
ENSG00000198604.6	BAZ1A	0.134417	-0.734476	-0.870153	1.22172e-22
ENSG00000136485.10	DCAF7	0.0433537	-0.687591	-0.731915	1.4572e-22
ENSG00000147140.11	NONO	-0.155909	-0.725952	-0.570554	1.6421e-22
ENSG00000114353.12	GNAI2	0.0542533	-0.478498	-0.532795	1.96284e-22
ENSG00000134824.9	FADS2	-0.310929	-0.777457	-0.4667	2.08677e-22
ENSG00000137804.8	NUSAP1	-0.23452	-1.04315	-0.810132	2.10002e-22
ENSG00000153201.11	RANBP2	0.11681	-0.738208	-0.855859	2.20781e-22
ENSG00000100578.10	KIAA0586	0.111286	-1.3433	-1.45856	2.75265e-22
ENSG00000104774.8	MAN2B1	0.209894	-0.308199	-0.518034	2.9985e-22
ENSG00000116478.7	HDAC1	0.0236409	-0.671002	-0.695385	3.15625e-22
ENSG00000101596.10	SMCHD1	0.147333	-0.939992	-1.08947	3.20165e-22
ENSG00000131143.4	COX4I1	0.0340353	-0.501169	-0.535523	3.20535e-22
ENSG00000124795.10	DEK	-0.138919	-1.36773	-1.23263	3.28254e-22
ENSG00000169679.10	BUB1	-0.23695	-1.00793	-0.772235	4.03206e-22
ENSG00000185862.5	EVI2B	0.404858	-0.538773	-0.944482	4.34438e-22
ENSG00000078618.15	NRD1	0.128366	-0.608958	-0.737894	4.39092e-22
ENSG00000107937.14	GTPBP4	0.0609668	-0.818974	-0.881172	4.97381e-22
ENSG00000108953.12	YWHAE	-0.256202	-0.997458	-0.742048	5.04254e-22
ENSG00000115677.12	HDLBP	-0.0943672	-0.714648	-0.620754	5.05453e-22
ENSG00000140319.6	SRP14	0.180524	-0.537086	-0.718204	5.21183e-22
ENSG00000160201.7	U2AF1	0.03456	-0.862496	-0.898087	5.29049e-22
ENSG00000010256.6	UQCRC1	-0.0522196	-0.568433	-0.516707	5.58487e-22
ENSG00000134153.5	EMC7	0.0177257	-1.33703	-1.35868	6.2009e-22
ENSG00000141522.7	ARHGDIA	-0.116888	-0.729198	-0.613029	6.30267e-22
ENSG00000136810.8	TXN	-0.173414	-0.964667	-0.79256	7.86094e-22
ENSG00000165629.15	ATP5C1	0.0744946	-0.583774	-0.658927	8.18257e-22
ENSG00000088205.8	DDX18	0.0265063	-0.962525	-0.990468	8.7233e-22
ENSG00000121060.10	TRIM25	0.0435961	-0.804604	-0.849313	8.88199e-22
ENSG00000129084.13	PSMA1	0.0704559	-0.984679	-1.05728	9.29967e-22
ENSG00000244038.5	DDOST	-0.00951115	-0.402484	-0.392921	1.00246e-21
ENSG00000111481.5	COPZ1	-0.0788321	-1.16106	-1.0847	1.13134e-21
ENSG00000069849.6	ATP1B3	0.0661964	-0.989193	-1.05732	1.18451e-21
ENSG00000171848.9	RRM2	-0.481548	-1.2036	-0.723315	1.23375e-21
ENSG00000170027.5	YWHAG	0.00950916	-0.533123	-0.543086	1.30956e-21
ENSG00000088325.11	TPX2	-0.326078	-1.18244	-0.858091	1.51369e-21
ENSG00000005022.5	SLC25A5	-0.104841	-0.662678	-0.55815	1.54067e-21
ENSG00000062822.8	POLD1	-0.333345	-0.991872	-0.659284	1.61398e-21
ENSG00000131238.12	PPT1	0.241103	-0.431716	-0.673092	1.63575e-21
ENSG00000136279.14	DBNL	0.152218	-0.56454	-0.717525	1.69168e-21
ENSG00000085449.10	WDFY1	0.206288	-0.93699	-1.14565	1.72665e-21
ENSG00000134516.11	DOCK2	0.18036	-0.349474	-0.53001	1.76911e-21
ENSG00000182054.5	IDH2	-0.0727048	-0.660936	-0.588923	1.88966e-21
ENSG00000165678.15	GHITM	0.0179922	-0.594527	-0.613054	1.96509e-21
ENSG00000101557.10	USP14	0.00481459	-0.910565	-0.917071	1.9863e-21
ENSG00000142230.7	SAE1	-0.0751551	-0.800604	-0.72606	2.20395e-21
ENSG00000163466.11	ARPC2	0.121649	-0.491853	-0.613952	2.2468e-21
ENSG00000182220.9	ATP6AP2	0.195042	-0.765534	-0.961802	2.50744e-21
ENSG00000101161.6	PRPF6	-0.0434753	-0.7849	-0.741958	2.68725e-21
ENSG00000090621.9	PABPC4	0.0123884	-0.9141	-0.927962	3.17037e-21
ENSG00000111237.14	VPS29	0.131589	-1.09849	-1.23326	3.22672e-21
ENSG00000090686.11	USP48	0.266977	-0.664579	-0.932667	3.41419e-21
ENSG00000082153.13	BZW1	-0.105432	-0.950612	-0.846306	4.24935e-21
ENSG00000197043.9	ANXA6	0.0507885	-0.489841	-0.54106	4.28979e-21
ENSG00000090863.7	GLG1	0.165544	-0.545279	-0.711371	4.48207e-21
ENSG00000087460.19	GNAS	0.0545421	-0.457449	-0.512372	4.78377e-21
ENSG00000127616.13	SMARCA4	-0.00888384	-0.504173	-0.495403	4.87267e-21
ENSG00000170606.9	HSPA4	0.0277711	-0.626289	-0.654806	5.23402e-21
ENSG00000100941.4	PNN	0.400968	-0.555103	-0.957121	5.62051e-21
ENSG00000055917.11	PUM2	0.21943	-0.710941	-0.931535	5.62051e-21
ENSG00000149100.8	EIF3M	-0.0223866	-0.623381	-0.601295	5.64784e-21
ENSG00000078668.9	VDAC3	-0.0586186	-0.644586	-0.586591	5.67892e-21
ENSG00000117139.12	KDM5B	0.152457	-0.682708	-0.836012	6.44953e-21
ENSG00000138326.14	RPS24	-0.625186	-1.33541	-0.711441	6.44953e-21
ENSG00000092841.14	MYL6	0.142858	-0.349313	-0.492693	6.58341e-21
ENSG00000132549.14	VPS13B	0.361662	-0.79453	-1.15815	6.92579e-21
ENSG00000149806.6	FAU	0.0205076	-0.572579	-0.593486	7.3179e-21
ENSG00000148180.12	GSN	0.374491	-0.0723202	-0.447068	7.60875e-21
ENSG00000067560.6	RHOA	-0.0133537	-0.5327	-0.519535	9.21781e-21
ENSG00000087365.10	SF3B2	-0.106544	-0.708683	-0.602939	1.19696e-20
ENSG00000129083.8	COPB1	0.0395847	-0.633268	-0.673435	1.23722e-20
ENSG00000111605.12	CPSF6	0.0878673	-0.623516	-0.712281	1.31547e-20
ENSG00000145495.10	MARCH6	0.149356	-0.944386	-1.09571	1.39228e-20
ENSG00000168653.6	NDUFS5	0.0769346	-0.950719	-1.02944	1.39724e-20
ENSG00000196374.5	HIST1H2BM	-0.319806	-0.849992	-0.53078	1.44944e-20
ENSG00000123609.6	NMI	0.106273	-0.939535	-1.04758	1.50848e-20
ENSG00000085377.9	PREP	0.0394816	-0.846334	-0.886982	1.66519e-20
ENSG00000113643.4	RARS	0.052447	-0.817522	-0.871199	1.81332e-20
ENSG00000185201.12	IFITM2	0.343738	-0.369503	-0.7138	1.81332e-20
ENSG00000000419.8	DPM1	0.0900905	-1.08913	-1.18148	1.8303e-20
ENSG00000121152.5	NCAPH	-0.222304	-1.32971	-1.11001	2.0688e-20
ENSG00000102054.13	RBBP7	-0.150869	-0.886258	-0.736246	2.18873e-20
ENSG00000165916.4	PSMC3	-0.238488	-0.944178	-0.706435	2.20399e-20
ENSG00000096063.10	SRPK1	-0.00251976	-1.22013	-1.22053	2.23974e-20
ENSG00000018510.8	AGPS	0.147827	-0.841527	-0.990905	2.26757e-20
ENSG00000188229.5	TUBB4B	-0.396842	-0.820906	-0.424532	2.4355e-20
ENSG00000182572.2	HIST1H3I	-0.307315	-0.695615	-0.388627	2.4808e-20
ENSG00000111229.11	ARPC3	0.221292	-0.542213	-0.764351	2.51671e-20
ENSG00000084754.6	HADHA	0.0768855	-0.528802	-0.606003	2.6111e-20
ENSG00000107438.4	PDLIM1	0.169433	-0.611024	-0.781187	2.8422e-20
ENSG00000123200.12	ZC3H13	0.126845	-0.895411	-1.02377	3.30287e-20
ENSG00000130309.6	COLGALT1	-0.253146	-0.794846	-0.542031	3.31239e-20
ENSG00000198056.9	PRIM1	-0.252581	-1.53605	-1.28775	3.42735e-20
ENSG00000067048.12	DDX3Y	0.194704	-0.742018	-0.937727	3.55523e-20
ENSG00000136518.12	ACTL6A	-0.15251	-0.966985	-0.815421	3.93363e-20
ENSG00000144746.6	ARL6IP5	0.31774	-0.624032	-0.942778	4.24075e-20
ENSG00000171988.13	JMJD1C	0.289553	-0.73904	-1.03017	4.37383e-20
ENSG00000135506.11	OS9	0.0468209	-0.511146	-0.558148	4.52252e-20
ENSG00000095002.8	MSH2	-0.235948	-1.17496	-0.940955	4.85204e-20
ENSG00000091140.8	DLD	0.191421	-0.535423	-0.727297	5.11299e-20
ENSG00000065518.7	NDUFB4	0.0502564	-0.932436	-0.984364	5.11806e-20
ENSG00000107651.8	SEC23IP	0.123071	-0.863938	-0.98827	5.16013e-20
ENSG00000179091.4	CYC1	-0.0788911	-0.546977	-0.468302	5.48971e-20
ENSG00000077254.10	USP33	0.156639	-1.08651	-1.2461	5.62832e-20
ENSG00000123144.6	C19orf43	-0.161489	-1.20526	-1.04624	5.71665e-20
ENSG00000134313.10	KIDINS220	0.115411	-1.46467	-1.586	6.26776e-20
ENSG00000135535.10	CD164	0.0921278	-0.852846	-0.946089	6.45103e-20
ENSG00000148672.7	GLUD1	0.20578	-0.681824	-0.88859	6.46483e-20
ENSG00000115816.9	CEBPZ	0.121185	-0.879047	-1.00245	6.50112e-20
ENSG00000104549.7	SQLE	-0.149614	-0.789707	-0.640927	6.69637e-20
ENSG00000069345.7	DNAJA2	0.134515	-0.736965	-0.872717	7.12452e-20
ENSG00000179051.9	RCC2	-0.0987168	-0.759372	-0.661231	7.74818e-20
ENSG00000106052.9	TAX1BP1	0.277852	-0.636863	-0.915894	7.81273e-20
ENSG00000142657.16	PGD	0.100014	-0.410612	-0.510683	7.86646e-20
ENSG00000101310.10	SEC23B	-0.0927453	-0.877143	-0.785497	8.08154e-20
ENSG00000141543.5	EIF4A3	-0.0507443	-0.579137	-0.528687	9.74684e-20
ENSG00000077147.10	TM9SF3	0.164345	-0.663308	-0.828277	1.09633e-19
ENSG00000132475.4	H3F3B	0.129579	-0.533286	-0.663188	1.13212e-19
ENSG00000161057.6	PSMC2	0.0877289	-0.742202	-0.831286	1.13245e-19
ENSG00000136448.7	NMT1	-0.0674738	-1.04992	-0.984335	1.25864e-19
ENSG00000079805.12	DNM2	-0.0184384	-0.608181	-0.590236	1.27189e-19
ENSG00000198408.9	MGEA5	0.207144	-0.950124	-1.15958	1.33926e-19
ENSG00000171858.13	RPS21	0.103045	-0.425849	-0.529216	1.34337e-19
ENSG00000182168.10	UNC5C	-0.00465094	-0.83399	-0.830754	1.36436e-19
ENSG00000129675.11	ARHGEF6	0.293729	-0.642187	-0.936808	1.38328e-19
ENSG00000100427.11	MLC1	0.0428013	-0.50425	-0.547186	1.43998e-19
ENSG00000112159.7	MDN1	0.07422	-0.707218	-0.782443	1.48849e-19
ENSG00000213024.6	NUP62	-0.163828	-0.769772	-0.606553	1.59467e-19
ENSG00000188976.6	NOC2L	-0.100898	-1.00421	-0.905053	1.81329e-19
ENSG00000111142.9	METAP2	0.0462879	-0.821171	-0.86882	1.96376e-19
ENSG00000056097.11	ZFR	-0.0449288	-0.613098	-0.568546	2.02533e-19
ENSG00000165219.17	GAPVD1	0.0318943	-0.926998	-0.960831	2.09354e-19
ENSG00000103657.9	HERC1	0.325479	-0.551242	-0.877601	2.10581e-19
ENSG00000067596.6	DHX8	0.0324054	-1.06356	-1.0985	2.12492e-19
ENSG00000177600.4	RPLP2	0.172066	-0.235531	-0.407757	2.12492e-19
ENSG00000108604.11	SMARCD2	0.0266988	-0.72792	-0.75564	2.21512e-19
ENSG00000197756.5	RPL37A	-0.882222	-1.42088	-0.539356	2.24959e-19
ENSG00000067057.12	PFKP	-0.170636	-0.759737	-0.589541	2.28667e-19
ENSG00000100603.9	SNW1	-0.00373399	-0.924634	-0.922526	2.29668e-19
ENSG00000170315.9	UBB	-0.147227	-0.760329	-0.613573	2.35177e-19
ENSG00000169299.9	PGM2	0.184863	-0.845584	-1.03202	2.35661e-19
ENSG00000126602.6	TRAP1	-0.0446592	-0.664871	-0.620746	2.5369e-19
ENSG00000135776.4	ABCB10	0.0787548	-1	-1.08131	2.84485e-19
ENSG00000122952.12	ZWINT	-0.225981	-1.25606	-1.03289	2.84622e-19
ENSG00000008282.3	SYPL1	0.0570366	-0.743224	-0.801393	3.16818e-19
ENSG00000182676.4	PPP1R27	-0.149029	-0.645525	-0.496939	3.19925e-19
ENSG00000116120.8	FARSB	0.0287455	-0.80834	-0.838348	3.76527e-19
ENSG00000075292.14	ZNF638	0.138291	-0.802193	-0.941836	3.85538e-19
ENSG00000134375.6	TIMM17A	0.0452095	-1.18107	-1.22999	4.19977e-19
ENSG00000114021.7	NIT2	0.0615037	-0.988504	-1.05224	4.32777e-19
ENSG00000152270.4	PDE3B	0.0550894	-1.04687	-1.10451	4.39303e-19
ENSG00000168918.9	INPP5D	-0.0491055	-0.529203	-0.480226	4.51697e-19
ENSG00000174444.10	RPL4	0.0632269	-0.402811	-0.466184	4.61804e-19
ENSG00000196331.5	HIST1H2BO	-0.364552	-0.908719	-0.544822	4.85919e-19
ENSG00000179918.15	SEPHS2	0.0506438	-0.888031	-0.940033	4.87158e-19
ENSG00000102900.8	NUP93	-0.173988	-0.947079	-0.774183	4.93076e-19
ENSG00000176986.10	SEC24C	-0.144374	-0.865699	-0.7226	4.93976e-19
ENSG00000119638.8	NEK9	0.17647	-0.736965	-0.915002	5.04726e-19
ENSG00000142864.10	SERBP1	-0.309271	-1.2437	-0.936624	5.23455e-19
ENSG00000147684.3	NDUFB9	0.0776977	-0.541678	-0.620039	5.31223e-19
ENSG00000118640.6	VAMP8	0.0966864	-0.549806	-0.647153	5.47929e-19
ENSG00000083520.10	DIS3	0.0670203	-0.929874	-0.998912	5.82865e-19
ENSG00000115368.5	WDR75	0.231908	-0.863118	-1.09679	6.09737e-19
ENSG00000113569.11	NUP155	-0.175747	-0.969908	-0.795335	6.26131e-19
ENSG00000077312.4	SNRPA	-0.236879	-0.923466	-0.687577	6.26131e-19
ENSG00000138594.8	TMOD3	0.00937006	-1.28129	-1.29482	6.35303e-19
ENSG00000100347.10	SAMM50	0.0914208	-0.750972	-0.843668	7.04916e-19
ENSG00000108588.9	CCDC47	0.112095	-0.675038	-0.788319	7.07279e-19
ENSG00000156482.6	RPL30	0.193378	-0.251122	-0.444523	7.44851e-19
ENSG00000071537.9	SEL1L	0.119664	-0.741612	-0.862549	7.62331e-19
ENSG00000136960.8	ENPP2	0.493595	-0.400538	-0.89466	7.91861e-19
ENSG00000108848.11	LUC7L3	0.197737	-1.05247	-1.25339	8.58607e-19
ENSG00000163811.7	WDR43	0.148152	-0.699876	-0.84924	8.90886e-19
ENSG00000181789.10	COPG1	-0.109656	-0.633114	-0.523884	9.07292e-19
ENSG00000159840.11	ZYX	-0.124328	-0.582303	-0.458391	9.28489e-19
ENSG00000167004.8	PDIA3	-0.097834	-0.763123	-0.666305	9.42707e-19
ENSG00000047849.17	MAP4	-0.14591	-0.920199	-0.775186	1.02496e-18
ENSG00000185627.13	PSMD13	-0.102571	-0.847997	-0.746129	1.1563e-18
ENSG00000126261.8	UBA2	0.0634475	-0.659318	-0.723397	1.19746e-18
ENSG00000074201.4	CLNS1A	-0.0273368	-0.847191	-0.821193	1.23084e-18
ENSG00000100596.2	SPTLC2	0.127839	-0.595086	-0.723465	1.23596e-18
ENSG00000135317.8	SNX14	0.181632	-1.08406	-1.26897	1.52498e-18
ENSG00000132274.11	TRIM22	0.964311	0.23078	-0.73303	1.57729e-18
ENSG00000058262.5	SEC61A1	-0.124059	-0.594361	-0.470813	1.65773e-18
ENSG00000171488.10	LRRC8C	0.1229	-0.74487	-0.869312	1.70942e-18
ENSG00000120733.9	KDM3B	0.0492962	-0.6865	-0.736927	1.74499e-18
ENSG00000141510.11	TP53	0.100056	-0.477141	-0.577315	1.7652e-18
ENSG00000168488.14	ATXN2L	-0.196844	-0.86535	-0.669557	1.84325e-18
ENSG00000185088.8	RPS27L	0.654838	-0.122856	-0.778157	1.86777e-18
ENSG00000153310.14	FAM49B	0.168673	-0.577602	-0.747031	1.87371e-18
ENSG00000068654.11	POLR1A	0.000553263	-0.760911	-0.762249	1.95594e-18
ENSG00000184432.5	COPB2	-0.0128848	-0.586023	-0.573758	2.06241e-18
ENSG00000157227.8	MMP14	-0.183243	-0.756521	-0.573923	2.09924e-18
ENSG00000136709.7	WDR33	0.0184794	-0.934754	-0.954824	2.10791e-18
ENSG00000169385.2	RNASE2	0.0318112	-0.889676	-0.922946	2.17863e-18
ENSG00000205339.5	IPO7	0.0777427	-0.795461	-0.874327	2.48303e-18
ENSG00000184840.7	TMED9	-0.245886	-0.8269	-0.581886	2.76185e-18
ENSG00000126267.4	COX6B1	0.0142085	-0.488145	-0.502732	2.79309e-18
ENSG00000101972.14	STAG2	0.0277197	-0.711451	-0.740308	2.80776e-18
ENSG00000109519.8	GRPEL1	0.0999835	-0.823122	-0.924719	2.90691e-18
ENSG00000156966.6	B3GNT7	0.443497	-0.160992	-0.604888	3.15831e-18
ENSG00000168439.12	STIP1	-0.240013	-0.772155	-0.532799	3.19746e-18
ENSG00000096401.7	CDC5L	0.0982947	-0.798793	-0.898361	3.34112e-18
ENSG00000080345.13	RIF1	-0.0322398	-0.956056	-0.925594	3.38698e-18
ENSG00000158373.7	HIST1H2BD	-0.18671	-0.607947	-0.421499	3.56776e-18
ENSG00000254986.3	DPP3	0.00456897	-0.740356	-0.745542	3.78218e-18
ENSG00000162736.11	NCSTN	0.0841023	-0.653077	-0.738121	3.79035e-18
ENSG00000135624.11	CCT7	-1.31593	-1.80099	-0.485781	4.09183e-18
ENSG00000136937.8	NCBP1	0.00657796	-0.735801	-0.743401	4.50474e-18
ENSG00000134255.9	CEPT1	0.194926	-0.939879	-1.13709	4.81524e-18
ENSG00000100401.15	RANGAP1	-0.237325	-0.916342	-0.68027	4.91054e-18
ENSG00000135905.14	DOCK10	0.183597	-0.727747	-0.91272	5.06058e-18
ENSG00000186468.8	RPS23	0.121882	-0.388241	-0.510157	5.58289e-18
ENSG00000175054.10	ATR	0.198926	-1.14543	-1.34848	5.73309e-18
ENSG00000168496.3	FEN1	-0.464251	-1.23725	-0.774775	5.99925e-18
ENSG00000107099.11	DOCK8	0.110864	-0.393011	-0.504313	6.56837e-18
ENSG00000116584.13	ARHGEF2	-0.0952355	-0.705516	-0.610706	7.54741e-18
ENSG00000110108.5	TMEM109	0.0170923	-0.717446	-0.735209	8.25537e-18
ENSG00000131473.12	ACLY	-0.0328521	-0.679713	-0.647121	8.44334e-18
ENSG00000131171.8	SH3BGRL	0.550386	-0.369233	-0.920352	8.67648e-18
ENSG00000113387.7	SUB1	0.138898	-0.572203	-0.712014	9.14649e-18
ENSG00000065427.10	KARS	0.0425639	-0.536168	-0.57904	9.90442e-18
ENSG00000173692.8	PSMD1	-0.0890611	-0.752652	-0.664411	1.02359e-17
ENSG00000091483.6	FH	-0.0893407	-0.703817	-0.614847	1.04865e-17
ENSG00000115241.9	PPM1G	-0.103085	-0.698431	-0.595966	1.07111e-17
ENSG00000244462.3	RBM12	-0.0991092	-0.834134	-0.736277	1.12533e-17
ENSG00000184634.11	MED12	0.139268	-0.637874	-0.778094	1.36166e-17
ENSG00000184992.10	BRI3BP	0.112856	-0.915302	-1.03012	1.43418e-17
ENSG00000119705.5	SLIRP	0.0649478	-0.71261	-0.778819	1.45424e-17
ENSG00000170312.11	CDK1	-0.225757	-1.06999	-0.846097	1.53291e-17
ENSG00000197903.6	HIST1H2BK	-0.239781	-0.89044	-0.651419	1.54171e-17
ENSG00000122482.16	ZNF644	0.110246	-1.24286	-1.35747	1.55097e-17
ENSG00000131263.8	RLIM	0.116429	-1.152	-1.27239	1.57531e-17
ENSG00000134057.10	CCNB1	-0.329424	-0.914819	-0.586008	1.68342e-17
ENSG00000112306.7	RPS12	0.302035	-1.0458	-1.35219	1.7156e-17
ENSG00000065548.13	ZC3H15	0.0221633	-1.07251	-1.09738	1.97153e-17
ENSG00000168092.9	PAFAH1B2	0.0133014	-1.32193	-1.33989	2.04311e-17
ENSG00000124562.5	SNRPC	-0.138874	-1.11548	-0.978995	2.2185e-17
ENSG00000135018.9	UBQLN1	-0.0803938	-0.914608	-0.835635	2.28501e-17
ENSG00000170571.7	EMB	0.00564783	-0.915731	-0.922965	2.35064e-17
ENSG00000008952.12	SEC62	0.282821	-0.785102	-1.06961	2.51419e-17
ENSG00000173812.6	EIF1	-0.194181	-0.930737	-0.737727	2.5593e-17
ENSG00000147162.9	OGT	0.228364	-0.589669	-0.819086	2.56233e-17
ENSG00000168003.12	SLC3A2	-0.442435	-0.94475	-0.502728	2.62178e-17
ENSG00000129824.11	RPS4Y1	-0.649896	-1.26571	-0.61712	2.63991e-17
ENSG00000099341.7	PSMD8	-0.0623662	-0.573229	-0.51118	2.73853e-17
ENSG00000099624.3	ATP5D	-0.0955974	-0.688056	-0.59286	2.79338e-17
ENSG00000090273.9	NUDC	-0.189312	-1.01585	-0.828142	2.7985e-17
ENSG00000004478.5	FKBP4	-0.283528	-0.994099	-0.711677	2.84594e-17
ENSG00000114573.5	ATP6V1A	0.280027	-0.610347	-0.891404	3.27147e-17
ENSG00000164934.9	DCAF13	0.0582036	-0.700928	-0.759802	3.27766e-17
ENSG00000121966.6	CXCR4	0.22399	-0.323601	-0.547648	3.33996e-17
ENSG00000160633.8	SAFB	-0.135133	-0.828047	-0.694036	3.4337e-17
ENSG00000072778.15	ACADVL	-0.0419573	-0.527148	-0.485434	3.4595e-17
ENSG00000137547.4	MRPL15	-0.0959217	-1.02061	-0.926382	3.87284e-17
ENSG00000100442.6	FKBP3	0.0707252	-1.11005	-1.1843	4.44251e-17
ENSG00000148175.8	STOM	0.165798	-0.765534	-0.932639	4.49631e-17
ENSG00000139684.9	ESD	-0.0126682	-0.724938	-0.713373	4.55749e-17
ENSG00000163191.5	S100A11	0.31568	-0.250714	-0.56681	5.01385e-17
ENSG00000163939.14	PBRM1	0.172516	-0.799467	-0.973927	6.10908e-17
ENSG00000156471.8	PTDSS1	-0.0800534	-0.854883	-0.775908	6.1521e-17
ENSG00000165501.12	LRR1	-0.104878	-1.54597	-1.44713	6.32202e-17
ENSG00000132463.9	GRSF1	0.0641353	-0.792903	-0.858222	6.66679e-17
ENSG00000136261.10	BZW2	-0.000399571	-0.673018	-0.673407	6.85541e-17
ENSG00000135404.7	CD63	0.300815	-0.411154	-0.712727	7.26125e-17
ENSG00000113460.8	BRIX1	-0.0929166	-1.25321	-1.1636	7.81696e-17
ENSG00000109861.11	CTSC	0.113187	-0.393313	-0.506615	7.94788e-17
ENSG00000129951.14	LPPR3	-0.0656631	-0.521309	-0.455833	8.16919e-17
ENSG00000173113.2	TRMT112	0.00691441	-1.12553	-1.13596	8.36278e-17
ENSG00000143753.8	DEGS1	0.0766735	-0.861969	-0.940339	8.36278e-17
ENSG00000161847.9	RAVER1	-0.212908	-0.865458	-0.6535	8.59925e-17
ENSG00000075785.8	RAB7A	0.0892673	-0.546567	-0.63617	9.5979e-17
ENSG00000167553.10	TUBA1C	-0.337432	-1.08746	-0.751364	9.77997e-17
ENSG00000164163.6	ABCE1	0.162666	-0.764941	-0.928951	1.00036e-16
ENSG00000213639.5	PPP1CB	0.0580814	-0.6894	-0.748443	1.00531e-16
ENSG00000133872.9	TMEM66	0.0897613	-0.618385	-0.709107	1.01545e-16
ENSG00000065135.7	GNAI3	0.0154368	-0.827939	-0.844662	1.16784e-16
ENSG00000198755.6	RPL10A	-0.519007	-1.19228	-0.674319	1.16784e-16
ENSG00000145741.11	BTF3	0.0606551	-0.631	-0.69269	1.17003e-16
ENSG00000167721.6	TSR1	-0.126703	-0.97416	-0.849304	1.19358e-16
ENSG00000160789.15	LMNA	0.182135	-0.205883	-0.387868	1.20882e-16
ENSG00000115207.9	GTF3C2	-0.0543545	-1.23538	-1.18433	1.38779e-16
ENSG00000115232.9	ITGA4	0.226921	-0.494395	-0.721965	1.42778e-16
ENSG00000167900.7	TK1	-0.385502	-1.10994	-0.72564	1.48931e-16
ENSG00000168242.3	HIST1H2BI	-0.338285	-0.857981	-0.520544	1.61661e-16
ENSG00000127483.13	HP1BP3	0.052511	-0.576245	-0.629358	1.62568e-16
ENSG00000123636.13	BAZ2B	0.327519	-0.667855	-0.996657	1.64932e-16
ENSG00000150459.8	SAP18	0.11485	-0.518965	-0.634431	1.68717e-16
ENSG00000064666.10	CNN2	0.150271	-0.428334	-0.579026	1.71801e-16
ENSG00000112249.9	ASCC3	0.396373	-0.425764	-0.823077	1.84631e-16
ENSG00000072958.4	AP1M1	-0.0259204	-0.657445	-0.632201	1.96366e-16
ENSG00000166747.8	AP1G1	-0.0265333	-0.858272	-0.83318	2.16985e-16
ENSG00000153395.5	LPCAT1	0.0506357	-0.700946	-0.752877	2.17997e-16
ENSG00000197448.9	GSTK1	0.176131	-0.5115	-0.688333	2.315e-16
ENSG00000152253.4	SPC25	1.05371	-0.943415	-2.03717	2.3211e-16
ENSG00000113558.14	SKP1	0.123251	-0.903324	-1.02913	2.34094e-16
ENSG00000135390.13	ATP5G2	0.0276924	-0.399702	-0.427614	2.54807e-16
ENSG00000123983.9	ACSL3	-0.0478973	-0.891065	-0.844638	2.55414e-16
ENSG00000023318.7	ERP44	0.0921637	-0.569056	-0.661798	2.58958e-16
ENSG00000081237.14	PTPRC	0.242794	-0.462866	-0.706496	2.59707e-16
ENSG00000139641.8	ESYT1	-0.159486	-0.639252	-0.480086	2.70519e-16
ENSG00000134644.11	PUM1	-0.322566	-1.16285	-0.842129	2.71218e-16
ENSG00000185591.5	SP1	-0.0527126	-0.777607	-0.725689	2.76484e-16
ENSG00000075142.9	SRI	0.0437428	-1.64211	-1.69567	3.06867e-16
ENSG00000131844.11	MCCC2	0.0734801	-0.84226	-0.917526	3.06867e-16
ENSG00000168385.13	SEPT2	0.125031	-0.562936	-0.688601	3.46809e-16
ENSG00000121749.11	TBC1D15	0.0569676	-0.967432	-1.02641	3.49711e-16
ENSG00000138029.9	HADHB	0.227278	-0.308458	-0.535761	3.5342e-16
ENSG00000198862.9	LTN1	0.111823	-0.913744	-1.02748	3.81576e-16
ENSG00000126883.12	NUP214	-0.0621575	-0.782127	-0.721181	3.88333e-16
ENSG00000064601.12	CTSA	0.086074	-0.527666	-0.614064	3.88333e-16
ENSG00000147649.5	MTDH	-0.0226065	-0.76356	-0.741966	4.15184e-16
ENSG00000005810.13	MYCBP2	0.164866	-0.641345	-0.807176	4.55912e-16
ENSG00000139163.11	ETNK1	0.224262	-0.701238	-0.927153	4.71319e-16
ENSG00000142168.10	SOD1	0.060037	-0.684498	-0.745407	4.96073e-16
ENSG00000010610.5	CD4	0.190786	-0.256521	-0.447451	5.14463e-16
ENSG00000132341.7	RAN	-0.0994144	-0.791943	-0.693506	5.36598e-16
ENSG00000112576.8	CCND3	-0.112154	-0.669851	-0.558119	5.61996e-16
ENSG00000087269.11	NOP14	-0.0812109	-0.904652	-0.824634	5.68328e-16
ENSG00000136381.8	IREB2	0.253039	-0.596103	-0.850409	6.22817e-16
ENSG00000100242.11	SUN2	0.0833561	-0.398806	-0.482311	6.24828e-16
ENSG00000182117.4	NOP10	0.0168246	-0.973527	-0.993144	6.87749e-16
ENSG00000144354.9	CDCA7	-0.00498137	-0.953829	-0.950777	7.04687e-16
ENSG00000132432.9	SEC61G	-0.026263	-1.30812	-1.28622	7.11065e-16
ENSG00000198815.4	FOXJ3	0.191254	-0.678072	-0.870434	7.32094e-16
ENSG00000119707.9	RBM25	0.188335	-0.62849	-0.817748	7.3476e-16
ENSG00000166477.8	LEO1	0.134515	-0.861869	-0.998419	7.62473e-16
ENSG00000103018.12	CYB5B	-0.0956061	-1.01594	-0.922085	7.69887e-16
ENSG00000143183.12	TMCO1	0.0869722	-0.801618	-0.890482	7.71898e-16
ENSG00000140632.12	GLYR1	0.0861717	-0.636993	-0.724157	8.0903e-16
ENSG00000100519.7	PSMC6	0.0324808	-1.16773	-1.20446	8.30428e-16
ENSG00000004455.12	AK2	0.00519064	-0.827819	-0.834773	8.83437e-16
ENSG00000120265.12	PCMT1	0.0201547	-0.887525	-0.909597	8.95176e-16
ENSG00000150995.13	ITPR1	0.200417	-0.557217	-0.758458	9.93606e-16
ENSG00000133112.12	TPT1	0.221951	-0.477741	-0.700315	1.0128e-15
ENSG00000083720.8	OXCT1	0.152064	-0.92999	-1.08425	1.02267e-15
ENSG00000112339.10	HBS1L	0.12964	-1.12373	-1.25767	1.02504e-15
ENSG00000132142.15	ACACA	-0.0469706	-0.779801	-0.733952	1.02744e-15
ENSG00000130741.6	EIF2S3	-0.0954988	-0.851999	-0.758007	1.05775e-15
ENSG00000100129.13	EIF3L	-0.0797419	-0.676991	-0.598075	1.11856e-15
ENSG00000149273.10	RPS3	-0.703322	-1.09115	-0.388361	1.14488e-15
ENSG00000165934.8	CPSF2	0.161788	-0.596532	-0.759035	1.18673e-15
ENSG00000143476.13	DTL	-0.315693	-1.2177	-0.904082	1.21099e-15
ENSG00000077549.13	CAPZB	0.150685	-0.355611	-0.506595	1.26918e-15
ENSG00000100813.10	ACIN1	0.10082	-0.445463	-0.54659	1.2976e-15
ENSG00000177731.11	FLII	0.00373721	-0.518348	-0.522505	1.37346e-15
ENSG00000074842.3	C19orf10	-0.278619	-1.00692	-0.729726	1.4877e-15
ENSG00000116688.12	MFN2	-0.106881	-1.23816	-1.13526	1.56767e-15
ENSG00000174106.2	LEMD3	0.00768985	-1.24793	-1.26046	1.59262e-15
ENSG00000132382.10	MYBBP1A	-0.10119	-0.700439	-0.599702	1.59306e-15
ENSG00000100883.7	SRP54	-0.0865071	-0.974374	-0.889648	1.63885e-15
ENSG00000134802.13	SLC43A3	-0.10757	-0.662965	-0.555946	1.67003e-15
ENSG00000065183.11	WDR3	0.118439	-0.717717	-0.837307	1.67603e-15
ENSG00000119335.12	SET	-0.0262712	-1.31194	-1.29117	1.79326e-15
ENSG00000127884.4	ECHS1	0.146266	-0.479563	-0.626339	1.82583e-15
ENSG00000136824.14	SMC2	-0.236023	-0.985203	-0.750611	1.84655e-15
ENSG00000156304.10	SCAF4	-0.002959	-0.846955	-0.845459	1.85794e-15
ENSG00000130332.10	LSM7	-0.0353595	-0.610185	-0.575498	1.88028e-15
ENSG00000116171.12	SCP2	0.191442	-0.599462	-0.791798	1.97979e-15
ENSG00000145088.4	EAF2	0.0912732	-0.909584	-1.00299	2.01033e-15
ENSG00000167674.10	HDGFRP2	-0.137691	-0.95139	-0.815073	2.03051e-15
ENSG00000122958.10	VPS26A	0.0470098	-0.909397	-0.958474	2.21268e-15
ENSG00000101160.9	CTSZ	0.171712	-0.545548	-0.717712	2.23678e-15
ENSG00000132305.16	IMMT	0.0123606	-0.572923	-0.585955	2.24175e-15
ENSG00000135916.11	ITM2C	0.317177	-0.3904	-0.707939	2.39284e-15
ENSG00000140395.4	WDR61	0.057988	-0.835255	-0.895183	2.39304e-15
ENSG00000092820.13	EZR	-0.323204	-1.00938	-0.687148	2.6096e-15
ENSG00000120437.7	ACAT2	-0.113109	-0.685793	-0.573191	2.68042e-15
ENSG00000100300.13	TSPO	-0.00744067	-0.505303	-0.498419	2.84232e-15
ENSG00000115020.12	PIKFYVE	0.150193	-0.807354	-0.959923	2.8518e-15
ENSG00000108559.7	NUP88	-0.0564904	-0.932885	-0.877817	2.98021e-15
ENSG00000160255.12	ITGB2	0.0482526	-0.280856	-0.329299	3.02294e-15
ENSG00000003756.12	RBM5	0.197822	-0.616671	-0.815319	3.07822e-15
ENSG00000114439.14	BBX	0.197601	-1.20945	-1.41255	3.20821e-15
ENSG00000105669.8	COPE	-0.13658	-0.525535	-0.389182	3.46836e-15
ENSG00000135821.12	GLUL	-0.12586	-0.551745	-0.426087	3.50726e-15
ENSG00000112739.12	PRPF4B	0.170881	-0.785406	-0.9584	3.61478e-15
ENSG00000103275.14	UBE2I	-0.0760619	-0.908139	-0.833384	3.67564e-15
ENSG00000102753.5	KPNA3	0.111498	-1.18948	-1.30567	3.71407e-15
ENSG00000160710.11	ADAR	-0.0606129	-0.653268	-0.593332	4.41377e-15
ENSG00000048828.12	FAM120A	-0.0451774	-0.739472	-0.695589	4.49062e-15
ENSG00000197299.6	BLM	-0.166248	-1.18269	-1.01928	4.56801e-15
ENSG00000100591.3	AHSA1	-0.124073	-0.773114	-0.649732	4.6117e-15
ENSG00000111961.12	SASH1	0.217544	-1.0458	-1.26799	4.64315e-15
ENSG00000133104.8	SPG20	0.0845827	-0.572487	-0.657684	4.71119e-15
ENSG00000095319.10	NUP188	-0.217312	-0.81516	-0.59847	4.80973e-15
ENSG00000132300.14	PTCD3	0.118096	-0.738875	-0.858383	4.95846e-15
ENSG00000013275.3	PSMC4	-0.0697933	-0.646691	-0.577267	5.02262e-15
ENSG00000087088.15	BAX	0.406622	-0.283989	-0.690778	5.03266e-15
ENSG00000110876.8	SELPLG	0.299241	-0.450502	-0.750647	5.1423e-15
ENSG00000079616.8	KIF22	-0.28046	-0.948415	-0.669362	5.43257e-15
ENSG00000108270.6	AATF	1.73748e-08	-0.818553	-0.82011	5.66054e-15
ENSG00000105819.9	PMPCB	0.0248747	-0.792903	-0.8193	6.42326e-15
ENSG00000180198.11	RCC1	-0.355145	-1.20575	-0.853179	6.45117e-15
ENSG00000156970.8	BUB1B	-0.221654	-1.07179	-0.85179	6.70696e-15
ENSG00000167613.11	LAIR1	-1.84966	-0.289858	1.55536	6.83704e-15
ENSG00000001497.12	LAS1L	-0.207981	-0.947258	-0.740974	7.64766e-15
ENSG00000183337.12	BCOR	-0.0933952	-0.810228	-0.718227	7.87584e-15
ENSG00000092853.9	CLSPN	-0.090849	-1.18934	-1.10198	8.08813e-15
ENSG00000138035.10	PNPT1	0.0812194	-0.984403	-1.06878	8.13359e-15
ENSG00000120899.13	PTK2B	0.119034	-0.333686	-0.452804	8.18736e-15
ENSG00000133835.10	HSD17B4	-0.0144319	-0.745305	-0.731973	8.3e-15
ENSG00000141526.10	SLC16A3	-0.154361	-0.608313	-0.454271	8.45662e-15
ENSG00000127481.10	UBR4	0.10095	-0.409001	-0.510337	8.54002e-15
ENSG00000174953.9	DHX36	0.16353	-1.13289	-1.3016	8.56922e-15
ENSG00000119203.9	CPSF3	-0.0178251	-0.814285	-0.797676	8.95202e-15
ENSG00000162368.9	CMPK1	0.123285	-1.03899	-1.1657	9.20777e-15
ENSG00000159322.13	ADPGK	0.120191	-0.757576	-0.879192	9.55133e-15
ENSG00000083845.4	RPS5	0.0159756	-0.295414	-0.311675	9.55296e-15
ENSG00000119397.12	CNTRL	0.28986	-0.52284	-0.813555	9.62058e-15
ENSG00000094916.9	CBX5	0.125385	-0.725377	-0.852452	1.00918e-14
ENSG00000124571.13	XPO5	-0.0433383	-0.716207	-0.673548	1.01138e-14
ENSG00000044115.16	CTNNA1	-0.0845829	-0.662071	-0.578384	1.03738e-14
ENSG00000089048.10	ESF1	0.15344	-1.56884	-1.73336	1.10419e-14
ENSG00000130725.3	UBE2M	0.0500576	-0.938013	-0.990515	1.12218e-14
ENSG00000108828.11	VAT1	-0.100285	-0.842171	-0.74303	1.22505e-14
ENSG00000136108.10	CKAP2	-0.0585969	-1.03427	-0.978582	1.23829e-14
ENSG00000157637.8	SLC38A10	-0.0736371	-0.660424	-0.58723	1.24356e-14
ENSG00000161203.9	AP2M1	0.000947723	-0.546894	-0.548209	1.24878e-14
ENSG00000116266.6	STXBP3	0.195704	-0.865698	-1.06424	1.27341e-14
ENSG00000115310.13	RTN4	-0.0464195	-0.830075	-0.785041	1.27607e-14
ENSG00000090861.11	AARS	-0.399529	-0.83423	-0.435047	1.29538e-14
ENSG00000104325.2	DECR1	0.178548	-0.587377	-0.766656	1.31282e-14
ENSG00000165525.13	NEMF	0.20199	-0.916476	-1.12173	1.33164e-14
ENSG00000205531.8	NAP1L4	-0.0385412	-0.867362	-0.830263	1.34878e-14
ENSG00000115419.8	GLS	0.210423	-0.662418	-0.874024	1.35684e-14
ENSG00000116747.8	TROVE2	0.144887	-1.02018	-1.16861	1.3778e-14
ENSG00000181163.9	NPM1	-0.0669876	-1.1822	-1.11887	1.39585e-14
ENSG00000127463.9	EMC1	0.0936626	-0.547751	-0.642036	1.42929e-14
ENSG00000112531.12	QKI	0.249963	-0.611075	-0.862442	1.45964e-14
ENSG00000104889.4	RNASEH2A	-0.419229	-1.06871	-0.65099	1.49961e-14
ENSG00000132361.12	CLUH	-0.171196	-0.792195	-0.621745	1.5115e-14
ENSG00000104529.13	EEF1D	0.0155297	-0.571747	-0.58784	1.5238e-14
ENSG00000114480.8	GBE1	-0.1929	-0.80471	-0.612626	1.53215e-14
ENSG00000071894.10	CPSF1	0.18157	-0.556523	-0.738332	1.67147e-14
ENSG00000095015.5	MAP3K1	0.136873	-0.743224	-0.881763	1.71388e-14
ENSG00000113141.11	IK	0.111617	-0.735102	-0.848315	1.71731e-14
ENSG00000160752.10	FDPS	-0.286725	-0.787214	-0.500918	1.75668e-14
ENSG00000137259.2	HIST1H2AB	-0.271745	-0.826712	-0.555654	1.78703e-14
ENSG00000101126.11	ADNP	0.0930796	-0.762605	-0.857522	1.81769e-14
ENSG00000110651.7	CD81	-0.0416734	-0.455508	-0.413902	1.83204e-14
ENSG00000130303.8	BST2	0.0739374	-0.509013	-0.583558	1.85945e-14
ENSG00000105486.9	LIG1	-0.22089	-0.794531	-0.574142	1.95901e-14
ENSG00000198374.3	HIST1H2AL	-0.4201	-0.927487	-0.507968	1.99417e-14
ENSG00000067167.3	TRAM1	-0.112065	-1.07871	-0.968955	2.03816e-14
ENSG00000168028.9	RPSA	0.039692	-1.09192	-1.13533	2.10972e-14
ENSG00000116005.7	PCYOX1	0.35018	-0.721535	-1.0742	2.14852e-14
ENSG00000140497.12	SCAMP2	0.0451638	-0.685891	-0.732204	2.14852e-14
ENSG00000198901.9	PRC1	-0.237971	-0.942571	-0.706065	2.14852e-14
ENSG00000115902.6	SLC1A4	-0.0665855	-0.600783	-0.534657	2.14852e-14
ENSG00000087191.8	PSMC5	-0.028322	-0.720346	-0.692821	2.14919e-14
ENSG00000089327.10	FXYD5	-0.169809	-1.29897	-1.13356	2.22465e-14
ENSG00000186480.8	INSIG1	-0.205092	-0.707681	-0.503019	2.27487e-14
ENSG00000124789.7	NUP153	-0.134186	-0.916533	-0.783672	2.32454e-14
ENSG00000170759.10	KIF5B	0.13318	-0.594181	-0.727973	2.36388e-14
ENSG00000185811.12	IKZF1	0.0343624	-0.631132	-0.66602	2.37661e-14
ENSG00000176619.6	LMNB2	-0.217791	-0.761011	-0.543693	2.37661e-14
ENSG00000151726.9	ACSL1	-0.11928	-0.775162	-0.657129	2.39791e-14
ENSG00000112759.12	SLC29A1	-0.273623	-1.07215	-0.800012	2.4161e-14
ENSG00000165416.10	SUGT1	0.0852419	-1.37037	-1.46224	2.46038e-14
ENSG00000104419.10	NDRG1	-0.272126	-0.752619	-0.481101	2.53783e-14
ENSG00000041357.11	PSMA4	0.0768513	-0.449024	-0.526249	2.60821e-14
ENSG00000142347.12	MYO1F	0.199298	-0.243468	-0.443157	2.70495e-14
ENSG00000012660.9	ELOVL5	-0.037387	-0.901221	-0.865895	2.8842e-14
ENSG00000134759.9	ELP2	0.137271	-0.642573	-0.781245	2.97555e-14
ENSG00000115464.10	USP34	0.198784	-0.855183	-1.05706	3.03331e-14
ENSG00000136286.10	MYO1G	0.23557	-0.120066	-0.355831	3.1518e-14
ENSG00000108651.5	UTP6	0.186337	-0.477628	-0.664673	3.19536e-14
ENSG00000114030.8	KPNA1	0.0665695	-0.858824	-0.927542	3.40402e-14
ENSG00000136068.10	FLNB	0.181548	-0.440066	-0.622317	3.40402e-14
ENSG00000114686.4	MRPL3	0.0330258	-0.778368	-0.813247	3.43555e-14
ENSG00000082212.7	ME2	0.157301	-0.686407	-0.844714	3.53805e-14
ENSG00000129691.11	ASH2L	-0.0144965	-0.763765	-0.750594	3.62036e-14
ENSG00000013810.14	TACC3	-0.350266	-0.933572	-0.584072	3.63691e-14
ENSG00000071626.12	DAZAP1	-0.238061	-0.823535	-0.586127	3.86331e-14
ENSG00000101444.8	AHCY	-0.0889486	-0.573687	-0.485133	3.86331e-14
ENSG00000117868.11	ESYT2	-0.0971294	-0.621488	-0.524787	4.26087e-14
ENSG00000164430.11	MB21D1	0.0533953	-0.935551	-0.99158	4.29378e-14
ENSG00000115970.14	THADA	0.0637476	-0.7849	-0.849976	4.36753e-14
ENSG00000110711.5	AIP	0.0286355	-0.799087	-0.829216	4.64358e-14
ENSG00000071794.11	HLTF	0.275853	-0.769994	-1.04766	4.70517e-14
ENSG00000052802.8	MSMO1	-0.0777086	-1.1316	-1.0569	4.89806e-14
ENSG00000103187.6	COTL1	0.294395	-0.540568	-0.836074	4.9567e-14
ENSG00000172172.3	MRPL13	-0.178118	-1	-0.824008	4.98266e-14
ENSG00000159216.14	RUNX1	0.0423027	-0.688313	-0.731502	5.13566e-14
ENSG00000104897.5	SF3A2	-0.319566	-0.847568	-0.52875	5.14333e-14
ENSG00000124782.15	RREB1	0.050813	-0.653307	-0.704871	5.15258e-14
ENSG00000178921.9	PFAS	-0.315152	-0.990219	-0.676223	5.68523e-14
ENSG00000151348.9	EXT2	-0.0440196	-1.28605	-1.24687	5.76579e-14
ENSG00000185721.7	DRG1	-0.000647755	-0.916806	-0.918196	5.88768e-14
ENSG00000137193.9	PIM1	-0.265322	-0.830917	-0.566634	5.90326e-14
ENSG00000168792.4	ABHD15	0.108966	-1.23522	-1.35057	6.10891e-14
ENSG00000103035.6	PSMD7	-0.0115898	-0.83494	-0.824817	6.1367e-14
ENSG00000123064.8	DDX54	-0.0566272	-0.863427	-0.808684	6.35676e-14
ENSG00000163946.9	FAM208A	0.144307	-0.870232	-1.01694	6.38208e-14
ENSG00000074319.8	TSG101	0.0293316	-0.992051	-1.0246	6.41813e-14
ENSG00000159377.6	PSMB4	-0.101301	-0.594527	-0.493583	6.41813e-14
ENSG00000112996.5	MRPS30	0.0490077	-0.854394	-0.90503	6.82601e-14
ENSG00000165494.6	PCF11	0.151637	-0.820775	-0.974501	6.87068e-14
ENSG00000100644.12	HIF1A	0.14879	-0.971618	-1.12369	6.92694e-14
ENSG00000186517.9	ARHGAP30	0.10516	-0.620411	-0.726369	7.05316e-14
ENSG00000101464.6	PIGU	-0.0827776	-1.33758	-1.26001	7.17337e-14
ENSG00000090376.4	IRAK3	0.271062	-0.731183	-1.0045	7.19119e-14
ENSG00000205220.7	PSMB10	0.064681	-0.435977	-0.500962	7.19215e-14
ENSG00000243147.3	MRPL33	0.0984627	-0.795767	-0.895866	7.54588e-14
ENSG00000112200.12	ZNF451	0.175166	-0.933766	-1.11209	7.68485e-14
ENSG00000177119.11	ANO6	0.116115	-1.58496	-1.71203	7.89566e-14
ENSG00000197697.3	HIST1H2BE	-0.35263	-0.849881	-0.498051	8.3449e-14
ENSG00000104131.8	EIF3J	0.155552	-1.01027	-1.16938	8.68354e-14
ENSG00000178952.4	TUFM	-0.0861637	-0.505954	-0.419981	8.8201e-14
ENSG00000161960.10	EIF4A1	-0.0644487	-0.484768	-0.420386	8.98433e-14
ENSG00000104320.9	NBN	0.0768871	-0.869692	-0.949099	9.10618e-14
ENSG00000109133.8	TMEM33	0.136448	-0.936274	-1.07571	9.21264e-14
ENSG00000211456.6	SACM1L	0.346207	-0.515588	-0.862698	9.56165e-14
ENSG00000241837.2	ATP5O	0.207508	-0.409053	-0.61676	9.67521e-14
ENSG00000213619.5	NDUFS3	0.131478	-0.61471	-0.747566	9.81965e-14
ENSG00000080503.15	SMARCA2	0.0925257	-0.645947	-0.739284	9.95031e-14
ENSG00000106305.5	AIMP2	0.0642068	-0.688313	-0.753709	1.01925e-13
ENSG00000033800.9	PIAS1	0.250189	-0.649092	-0.900562	1.0877e-13
ENSG00000117133.6	RPF1	0.0788438	-0.86507	-0.946294	1.11725e-13
ENSG00000089220.4	PEBP1	0.0179192	-0.52167	-0.539886	1.15032e-13
ENSG00000107819.9	SFXN3	0.16088	-0.590124	-0.752174	1.19989e-13
ENSG00000198258.6	UBL5	0.0712195	-0.551593	-0.623686	1.19989e-13
ENSG00000137497.13	NUMA1	0.0487017	-0.400461	-0.449619	1.26026e-13
ENSG00000196961.8	AP2A1	-0.0273283	-0.507075	-0.479987	1.32599e-13
ENSG00000100220.7	RTCB	-0.0949909	-0.756478	-0.662532	1.35284e-13
ENSG00000083312.13	TNPO1	-0.031797	-0.769702	-0.738847	1.40145e-13
ENSG00000108506.7	INTS2	0.0821628	-1.11018	-1.19632	1.42479e-13
ENSG00000072786.8	STK10	-0.000347372	-0.743435	-0.744373	1.48039e-13
ENSG00000173145.7	NOC3L	0.114066	-0.999999	-1.11772	1.51263e-13
ENSG00000163131.6	CTSS	0.28911	-0.482062	-0.771695	1.52668e-13
ENSG00000065613.9	SLK	0.176179	-1.06088	-1.24105	1.53843e-13
ENSG00000149503.8	INCENP	-0.385383	-1.19078	-0.807102	1.54859e-13
ENSG00000077348.4	EXOSC5	0.0389073	-0.622386	-0.662199	1.55842e-13
ENSG00000092199.13	HNRNPC	-0.0744172	-0.790904	-0.717537	1.60304e-13
ENSG00000139436.16	GIT2	0.259847	-0.58823	-0.849247	1.6192e-13
ENSG00000161800.8	RACGAP1	-0.276837	-1.08989	-0.814775	1.6239e-13
ENSG00000164096.10	C4orf3	0.0915547	-0.767992	-0.861234	1.62524e-13
ENSG00000077420.11	APBB1IP	0.199523	-0.614709	-0.815647	1.66499e-13
ENSG00000181555.15	SETD2	0.134198	-0.954196	-1.09167	1.72832e-13
ENSG00000043462.7	LCP2	0.0726316	-0.695386	-0.769205	1.74882e-13
ENSG00000148843.9	PDCD11	0.0587105	-0.579338	-0.638718	1.75071e-13
ENSG00000107951.8	MTPAP	0.158027	-1.34513	-1.51056	1.7689e-13
ENSG00000110696.5	C11orf58	0.073425	-0.803972	-0.878909	1.78509e-13
ENSG00000134308.9	YWHAQ	-0.0521952	-0.710142	-0.659171	1.89298e-13
ENSG00000147010.13	SH3KBP1	0.161195	-0.486244	-0.647924	1.98293e-13
ENSG00000177613.7	CSTF2T	0.0235043	-0.792058	-0.817232	1.98541e-13
ENSG00000137563.7	GGH	-0.272137	-1.30743	-1.03893	2.02426e-13
ENSG00000149532.11	CPSF7	-0.073702	-0.941583	-0.870275	2.03276e-13
ENSG00000052749.9	RRP12	-0.162993	-0.932467	-0.770901	2.06525e-13
ENSG00000144744.12	UBA3	0.141673	-0.824913	-0.968602	2.16359e-13
ENSG00000197601.8	FAR1	0.0936095	-0.852658	-0.948399	2.16709e-13
ENSG00000196083.5	IL1RAP	-0.0300102	-0.701918	-0.673146	2.23251e-13
ENSG00000109805.5	NCAPG	-0.143476	-0.97814	-0.836826	2.45213e-13
ENSG00000105953.10	OGDH	0.072356	-0.450056	-0.523001	2.45213e-13
ENSG00000115233.7	PSMD14	-0.0117815	-0.8101	-0.799838	2.45882e-13
ENSG00000103365.11	GGA2	0.146164	-0.550692	-0.697882	2.62586e-13
ENSG00000117395.6	EBNA1BP2	-0.0704338	-0.853158	-0.784432	2.85563e-13
ENSG00000156735.6	BAG4	0.17988	-1.17333	-1.35893	2.86563e-13
ENSG00000103257.4	SLC7A5	-0.532109	-1.10483	-0.574048	2.88983e-13
ENSG00000111602.7	TIMELESS	-0.252002	-1.2718	-1.0235	2.9225e-13
ENSG00000023191.12	RNH1	-0.121026	-0.414481	-0.293702	2.94387e-13
ENSG00000137713.11	PPP2R1B	-0.00770593	-0.939739	-0.934351	3.07775e-13
ENSG00000120526.6	NUDCD1	-0.0117258	-0.921997	-0.912559	3.10777e-13
ENSG00000244754.4	N4BP2L2	0.292818	-1.01355	-1.31076	3.1155e-13
ENSG00000138802.7	SEC24B	0.121134	-1.12553	-1.25215	3.15484e-13
ENSG00000183741.7	CBX6	-0.0929803	-0.807355	-0.71535	3.16454e-13
ENSG00000163104.13	SMARCAD1	0.112028	-1.05364	-1.17015	3.31281e-13
ENSG00000169919.12	GUSB	-0.023761	-0.680382	-0.657815	3.33336e-13
ENSG00000166801.11	FAM111A	0.0388022	-1.07138	-1.11419	3.33354e-13
ENSG00000114127.6	XRN1	0.0444725	-1.03797	-1.08593	3.41639e-13
ENSG00000036257.8	CUL3	0.0954266	-0.805561	-0.902908	3.43847e-13
ENSG00000174437.12	ATP2A2	-0.052808	-0.505109	-0.452731	3.47095e-13
ENSG00000164258.7	NDUFS4	0.198904	-0.701341	-0.901497	3.49678e-13
ENSG00000126787.8	DLGAP5	-0.156564	-1.01178	-0.857089	3.5548e-13
ENSG00000100109.12	TFIP11	-0.146036	-1.18934	-1.04642	3.55503e-13
ENSG00000177084.12	POLE	-0.315259	-1.19417	-0.881498	3.55503e-13
ENSG00000133313.10	CNDP2	0.205301	-0.343115	-0.548494	3.55503e-13
ENSG00000156976.10	EIF4A2	0.197378	-0.67948	-0.878728	3.6136e-13
ENSG00000196510.8	ANAPC7	0.0262499	-0.781531	-0.809515	3.67407e-13
ENSG00000014919.8	COX15	0.0770296	-0.935148	-1.01528	3.79619e-13
ENSG00000086504.11	MRPL28	-0.0568888	-0.789321	-0.734001	3.89287e-13
ENSG00000085872.10	CHERP	-0.129011	-0.6734	-0.545197	3.9398e-13
ENSG00000108179.9	PPIF	-0.0650565	-0.650297	-0.586014	4.07647e-13
ENSG00000143337.14	TOR1AIP1	0.120363	-0.491388	-0.612383	4.23614e-13
ENSG00000107290.9	SETX	0.260297	-0.574978	-0.836556	4.28384e-13
ENSG00000100393.9	EP300	0.0338046	-0.628401	-0.663089	4.33924e-13
ENSG00000183258.7	DDX41	-0.0599845	-0.826851	-0.768365	4.49174e-13
ENSG00000138768.10	USO1	0.0201405	-0.807355	-0.829015	4.56331e-13
ENSG00000073921.13	PICALM	0.277046	-0.608421	-0.886634	4.615e-13
ENSG00000167005.9	NUDT21	-0.0230715	-0.938599	-0.918066	4.75483e-13
ENSG00000183530.9	PRR14L	0.0870346	-0.772048	-0.860682	4.75483e-13
ENSG00000149311.13	ATM	0.285624	-0.470791	-0.757225	4.76247e-13
ENSG00000163938.12	GNL3	0.0814862	-0.53172	-0.613926	4.89384e-13
ENSG00000157500.6	APPL1	0.240739	-0.876264	-1.12054	4.89762e-13
ENSG00000196576.10	PLXNB2	0.202229	-0.242387	-0.44498	5.30471e-13
ENSG00000114062.13	UBE3A	0.0587816	-1.29662	-1.3617	5.40638e-13
ENSG00000167815.7	PRDX2	-0.0546203	-0.526674	-0.472255	6.00366e-13
ENSG00000060688.8	SNRNP40	-0.0750475	-0.819151	-0.745298	6.57003e-13
ENSG00000139613.7	SMARCC2	-0.0181351	-0.688056	-0.671003	6.58981e-13
ENSG00000115866.6	DARS	-0.0440272	-0.602137	-0.558646	6.65863e-13
ENSG00000198824.4	CHAMP1	-0.0929788	-1.089	-0.998958	6.70907e-13
ENSG00000134283.13	PPHLN1	0.0191399	-0.893084	-0.914339	6.88493e-13
ENSG00000128585.13	MKLN1	0.29037	-0.859401	-1.15249	6.92235e-13
ENSG00000042753.7	AP2S1	-0.0243511	-0.73543	-0.712383	6.95138e-13
ENSG00000182511.7	FES	0.370951	-0.254421	-0.625894	6.95138e-13
ENSG00000161813.16	LARP4	0.144791	-0.7856	-0.932426	7.03173e-13
ENSG00000175567.4	UCP2	0.184243	-1.10154	-1.29128	7.05924e-13
ENSG00000135521.8	LTV1	0.0401406	-0.991684	-1.03477	7.08987e-13
ENSG00000184752.8	NDUFA12	0.2949	-0.410019	-0.705428	7.15135e-13
ENSG00000116679.11	IVNS1ABP	0.121794	-1.35548	-1.48609	7.32044e-13
ENSG00000168264.6	IRF2BP2	-0.00330058	-0.402983	-0.399752	7.49503e-13
ENSG00000105223.14	PLD3	0.485913	-0.0633023	-0.549167	7.60952e-13
ENSG00000035928.10	RFC1	-0.0531134	-1.10434	-1.05498	8.16942e-13
ENSG00000130119.11	GNL3L	0.0174432	-0.64565	-0.663954	8.22626e-13
ENSG00000055130.11	CUL1	0.210251	-1.15528	-1.37161	8.37189e-13
ENSG00000144218.14	AFF3	0.178062	-0.553598	-0.732495	8.42969e-13
ENSG00000163950.8	SLBP	-0.143997	-0.807355	-0.66461	8.47253e-13
ENSG00000100888.8	CHD8	0.0430727	-0.813988	-0.858969	8.98668e-13
ENSG00000198431.11	TXNRD1	0.0273774	-0.677132	-0.705711	8.98668e-13
ENSG00000113575.5	PPP2CA	-0.0252015	-0.643856	-0.619381	9.03365e-13
ENSG00000103549.17	RNF40	-0.0884635	-0.882476	-0.795932	9.19884e-13
ENSG00000089157.11	RPLP0	0.0817017	-0.791682	-0.875608	9.22059e-13
ENSG00000197943.5	PLCG2	0.284877	-0.379904	-0.665212	9.51727e-13
ENSG00000136731.8	UGGT1	-0.0141121	-0.656388	-0.643003	9.57063e-13
ENSG00000132507.13	EIF5A	-0.137824	-0.70156	-0.564326	9.93659e-13
ENSG00000105447.8	GRWD1	-0.211393	-0.882396	-0.672404	1.00598e-12
ENSG00000109180.10	OCIAD1	0.0308956	-0.756331	-0.788392	1.00758e-12
ENSG00000111358.9	GTF2H3	0.0692265	-1.11189	-1.18532	1.03316e-12
ENSG00000146918.15	NCAPG2	-0.231963	-1.0774	-0.848074	1.03542e-12
ENSG00000144867.7	SRPRB	-0.0333328	-0.819427	-0.787515	1.03542e-12
ENSG00000140525.13	FANCI	-0.263415	-1.1307	-0.869741	1.03973e-12
ENSG00000115919.10	KYNU	0.474032	-0.34665	-0.821552	1.06779e-12
ENSG00000164338.5	UTP15	-0.165708	-2	-1.8517	1.07826e-12
ENSG00000164548.6	TRA2A	0.10255	-0.690044	-0.794265	1.08942e-12
ENSG00000102699.5	PARP4	0.153539	-0.377918	-0.531932	1.09807e-12
ENSG00000114902.9	SPCS1	0.186194	-0.539158	-0.726542	1.10026e-12
ENSG00000030066.9	NUP160	0.00511309	-0.536194	-0.542034	1.10107e-12
ENSG00000068697.6	LAPTM4A	0.164681	-0.656623	-0.823068	1.11293e-12
ENSG00000059573.4	ALDH18A1	-0.159196	-0.743293	-0.584831	1.11333e-12
ENSG00000162231.9	NXF1	0.0665294	-0.824716	-0.893363	1.12699e-12
ENSG00000112578.5	BYSL	-0.0767016	-1.24286	-1.17083	1.12766e-12
ENSG00000175220.7	ARHGAP1	0.0500465	-0.517775	-0.568187	1.16122e-12
ENSG00000138081.15	FBXO11	0.128768	-1.01073	-1.1428	1.21984e-12
ENSG00000196365.7	LONP1	-0.231868	-0.689031	-0.457719	1.22232e-12
ENSG00000171634.12	BPTF	0.149636	-0.718674	-0.869782	1.30664e-12
ENSG00000079432.3	CIC	-0.146912	-1.14359	-0.999631	1.37464e-12
ENSG00000233822.3	HIST1H2BN	-0.242281	-0.958179	-0.71733	1.40592e-12
ENSG00000125743.6	SNRPD2	-0.160441	-0.573226	-0.413095	1.42172e-12
ENSG00000110700.2	RPS13	0.0608544	-0.378724	-0.439876	1.43621e-12
ENSG00000142875.15	PRKACB	0.244825	-1.06012	-1.31063	1.48537e-12
ENSG00000100227.13	POLDIP3	0.0238802	-0.802698	-0.828499	1.49672e-12
ENSG00000125912.6	NCLN	-0.200799	-0.887323	-0.68764	1.50704e-12
ENSG00000185130.4	HIST1H2BL	-0.405985	-1.09954	-0.694879	1.5365e-12
ENSG00000105355.4	PLIN3	0.00896924	-0.390172	-0.399245	1.54756e-12
ENSG00000128340.10	RAC2	0.0217484	-0.330224	-0.352122	1.55587e-12
ENSG00000136143.9	SUCLA2	0.183976	-1.14886	-1.33837	1.63276e-12
ENSG00000180182.6	MED14	-0.0196749	-0.968635	-0.951587	1.66058e-12
ENSG00000104973.10	MED25	-0.00688793	-0.627004	-0.62083	1.77762e-12
ENSG00000137812.15	CASC5	-0.312221	-1.18442	-0.874887	1.79812e-12
ENSG00000080608.9	KIAA0020	0.107803	-0.694261	-0.803619	1.79812e-12
ENSG00000178252.13	WDR6	-0.0782091	-0.696967	-0.61945	1.86378e-12
ENSG00000120699.8	EXOSC8	-0.165409	-1.06413	-0.900955	1.87795e-12
ENSG00000004779.5	NDUFAB1	0.0782999	-0.587156	-0.666085	1.95656e-12
ENSG00000110717.6	NDUFS8	-0.13224	-0.792767	-0.661624	1.99191e-12
ENSG00000109919.5	MTCH2	0.107016	-0.72792	-0.836521	1.99733e-12
ENSG00000260916.1	CCPG1	-0.218895	-0.995512	-0.778023	2.05926e-12
ENSG00000174891.8	RSRC1	0.142888	-0.860837	-1.00657	2.09241e-12
ENSG00000166938.8	DIS3L	-0.0528315	-1.56884	-1.52733	2.11908e-12
ENSG00000155959.6	VBP1	0.290551	-1.14359	-1.44067	2.15735e-12
ENSG00000180817.7	PPA1	-0.0659383	-0.895811	-0.831616	2.15801e-12
ENSG00000123131.8	PRDX4	-0.152939	-1.06289	-0.91247	2.23062e-12
ENSG00000163823.3	CCR1	0.181303	-0.535254	-0.717421	2.25963e-12
ENSG00000067704.8	IARS2	0.0382757	-0.592889	-0.631903	2.32746e-12
ENSG00000031698.8	SARS	0.0858541	-0.584962	-0.671818	2.35213e-12
ENSG00000116830.7	TTF2	-0.147125	-0.971087	-0.825748	2.4418e-12
ENSG00000116649.5	SRM	-0.000138549	-0.802834	-0.804446	2.4762e-12
ENSG00000138964.12	PARVG	0.113438	-0.372275	-0.486243	2.57114e-12
ENSG00000137947.7	GTF2B	0.0972103	-0.789782	-0.888788	2.66517e-12
ENSG00000140105.13	WARS	-0.364076	-0.918985	-0.555844	2.69231e-12
ENSG00000155438.7	MKI67IP	0.0990269	-0.887973	-0.989477	2.77721e-12
ENSG00000110917.3	MLEC	-0.126535	-0.951905	-0.827435	2.82679e-12
ENSG00000161638.6	ITGA5	-0.177007	-0.647698	-0.471114	2.89157e-12
ENSG00000163636.6	PSMD6	-0.058546	-0.735522	-0.678207	2.89854e-12
ENSG00000165417.7	GTF2A1	-0.0608913	-1.11839	-1.06077	2.94112e-12
ENSG00000183527.7	PSMG1	-0.0896703	-1.31626	-1.23284	2.94159e-12
ENSG00000091164.8	TXNL1	0.00606432	-0.818326	-0.825804	2.94262e-12
ENSG00000160888.6	IER2	-0.459604	-1.27539	-0.818374	2.95549e-12
ENSG00000109046.10	WSB1	0.037118	-0.75946	-0.798138	3.00107e-12
ENSG00000185728.12	YTHDF3	0.121748	-0.584962	-0.707899	3.04824e-12
ENSG00000138246.11	DNAJC13	0.363611	-0.567989	-0.933446	3.11596e-12
ENSG00000146842.12	TMEM209	-0.0928379	-0.944858	-0.854405	3.18135e-12
ENSG00000154719.9	MRPL39	-0.0369999	-0.942284	-0.908052	3.35503e-12
ENSG00000092010.10	PSME1	0.0901244	-0.332355	-0.422537	3.37412e-12
ENSG00000100902.6	PSMA6	0.138048	-0.602123	-0.741284	3.4199e-12
ENSG00000144895.7	EIF2A	-0.0525969	-0.78606	-0.735085	3.63388e-12
ENSG00000152291.9	TGOLN2	0.13581	-0.364997	-0.500976	3.65657e-12
ENSG00000075568.12	TMEM131	0.331449	-0.446256	-0.778626	4.01283e-12
ENSG00000101782.10	RIOK3	0.0521199	-1.07681	-1.13341	4.16251e-12
ENSG00000074071.9	MRPS34	-0.124721	-0.841302	-0.718013	4.19511e-12
ENSG00000005020.8	SKAP2	0.257075	-0.486624	-0.744726	4.38507e-12
ENSG00000160014.12	CALM3	0.0181458	-0.581141	-0.599989	4.39536e-12
ENSG00000156411.5	C14orf2	0.0781881	-0.722771	-0.802799	4.39999e-12
ENSG00000124214.15	STAU1	0.0413117	-0.865863	-0.90912	4.42445e-12
ENSG00000113532.8	ST8SIA4	0.135563	-1.07943	-1.21999	4.91681e-12
ENSG00000166986.8	MARS	-0.242437	-0.766839	-0.52498	4.92148e-12
ENSG00000171681.8	ATF7IP	0.172884	-0.631612	-0.805505	5.16735e-12
ENSG00000172845.9	SP3	0.0861782	-1.05795	-1.14796	5.16829e-12
ENSG00000059588.5	TARBP1	0.310954	-0.525461	-0.83782	5.24524e-12
ENSG00000155463.8	OXA1L	-0.0647519	-0.603224	-0.538947	5.31167e-12
ENSG00000172493.16	AFF1	0.171702	-0.496337	-0.668703	5.35274e-12
ENSG00000174485.10	DENND4A	0.136112	-0.739539	-0.87789	5.36061e-12
ENSG00000168827.10	GFM1	0.0981557	-0.648072	-0.747186	5.36804e-12
ENSG00000062485.14	CS	-0.0377493	-0.606886	-0.56978	5.39577e-12
ENSG00000144029.7	MRPS5	0.0827826	-1.01027	-1.09632	5.39579e-12
ENSG00000125651.9	GTF2F1	-0.191685	-0.812816	-0.622175	5.68686e-12
ENSG00000168175.10	MAPK1IP1L	-0.00271006	-0.744161	-0.742785	5.69229e-12
ENSG00000159720.7	ATP6V0D1	0.0834683	-0.484723	-0.568801	5.7435e-12
ENSG00000179010.10	MRFAP1	0.168834	-0.551795	-0.721392	5.75409e-12
ENSG00000172725.9	CORO1B	0.0600182	-0.444481	-0.504899	5.75986e-12
ENSG00000136930.8	PSMB7	-0.0741842	-0.661276	-0.587991	5.76645e-12
ENSG00000116984.8	MTR	0.00131109	-0.919217	-0.922724	5.77046e-12
ENSG00000115761.11	NOL10	0.0463664	-1.07455	-1.12497	5.88749e-12
ENSG00000143119.8	CD53	0.175127	-0.314476	-0.489924	5.88749e-12
ENSG00000156467.5	UQCRB	0.181389	-0.413676	-0.59544	6.14937e-12
ENSG00000180104.11	EXOC3	0.292506	-0.225609	-0.518203	6.15081e-12
ENSG00000103978.11	TMEM87A	0.0908723	-0.883186	-0.976217	6.24207e-12
ENSG00000133318.9	RTN3	0.0190458	-0.697152	-0.717791	6.41485e-12
ENSG00000108671.5	PSMD11	-0.209654	-0.956931	-0.74911	6.60356e-12
ENSG00000141027.16	NCOR1	0.0668683	-0.59172	-0.659266	6.63327e-12
ENSG00000168078.5	PBK	-0.193403	-1.27225	-1.08358	6.70207e-12
ENSG00000020922.8	MRE11A	-0.0204176	-1.06942	-1.05268	6.70207e-12
ENSG00000144357.12	UBR3	0.182947	-1.13465	-1.32289	6.71541e-12
ENSG00000166851.10	PLK1	-0.419177	-0.986273	-0.568124	6.79153e-12
ENSG00000109920.8	FNBP4	0.134223	-1.05153	-1.19047	6.81741e-12
ENSG00000171241.4	SHCBP1	-0.356659	-1.22432	-0.870587	6.82883e-12
ENSG00000068796.12	KIF2A	0.186878	-0.764621	-0.953948	6.97049e-12
ENSG00000184640.13	SEPT9	0.0805799	-0.56704	-0.648208	6.97049e-12
ENSG00000136240.5	KDELR2	-0.0844076	-1.1247	-1.04461	7.0018e-12
ENSG00000143379.8	SETDB1	0.0558918	-0.743091	-0.800256	7.00694e-12
ENSG00000175166.12	PSMD2	-0.133791	-0.661584	-0.528728	7.0674e-12
ENSG00000148634.11	HERC4	0.194561	-0.878009	-1.07565	7.09401e-12
ENSG00000116750.9	UCHL5	0.00498564	-0.862496	-0.869697	7.21895e-12
ENSG00000004487.11	KDM1A	0.0310645	-0.611194	-0.643002	7.45553e-12
ENSG00000163453.7	IGFBP7	0.351653	-0.706268	-1.06054	7.8029e-12
ENSG00000105329.5	TGFB1	-0.116808	-0.579212	-0.462665	7.82186e-12
ENSG00000172466.11	ZNF24	0.166209	-0.748815	-0.917622	7.94924e-12
ENSG00000104763.13	ASAH1	0.211657	-0.753085	-0.967092	8.29344e-12
ENSG00000123562.12	MORF4L2	-0.106523	-0.784515	-0.67922	8.29344e-12
ENSG00000103876.7	FAH	0.0758384	-0.714439	-0.791571	8.30122e-12
ENSG00000122884.8	P4HA1	0.0832277	-0.538712	-0.62299	8.60337e-12
ENSG00000164024.7	METAP1	0.044022	-0.85099	-0.897163	8.6739e-12
ENSG00000143995.15	MEIS1	0.17316	-0.881944	-1.05808	8.67927e-12
ENSG00000184661.9	CDCA2	-0.238134	-1.12969	-0.894699	9.00355e-12
ENSG00000117592.8	PRDX6	-0.02745	-0.670607	-0.644358	9.46028e-12
ENSG00000038274.12	MAT2B	0.0490284	-0.723064	-0.773188	9.47164e-12
ENSG00000124160.7	NCOA5	-0.0299483	-1.15672	-1.13179	9.79475e-12
ENSG00000101158.8	NELFCD	-0.0909629	-0.849094	-0.759435	1.00618e-11
ENSG00000067248.5	DHX29	0.176192	-1.13465	-1.31637	1.00831e-11
ENSG00000140374.11	ETFA	0.0958636	-0.459431	-0.556017	1.01548e-11
ENSG00000102265.7	TIMP1	0.0521607	-0.440939	-0.49333	1.02012e-11
ENSG00000089154.6	GCN1L1	-0.00338616	-0.469485	-0.466623	1.03712e-11
ENSG00000135837.11	CEP350	0.225715	-0.629481	-0.856597	1.0426e-11
ENSG00000123737.8	EXOSC9	-0.0579547	-1.28177	-1.23008	1.0472e-11
ENSG00000099795.2	NDUFB7	-0.145522	-0.905535	-0.762126	1.05347e-11
ENSG00000078369.13	GNB1	0.0439513	-0.495631	-0.540149	1.06151e-11
ENSG00000183520.7	UTP11L	-0.0394409	-0.922379	-0.884859	1.07474e-11
ENSG00000143179.8	UCK2	0.00298743	-0.781165	-0.785797	1.09156e-11
ENSG00000135972.4	MRPS9	0.167739	-1.05063	-1.22359	1.10926e-11
ENSG00000092531.5	SNAP23	0.227319	-0.948469	-1.17973	1.1206e-11
ENSG00000196226.2	HIST1H2BB	-0.305166	-0.799449	-0.494883	1.1206e-11
ENSG00000122545.13	SEPT7	0.128797	-0.946757	-1.07941	1.13735e-11
ENSG00000149084.7	HSD17B12	0.125687	-0.543705	-0.670071	1.14822e-11
ENSG00000155189.7	AGPAT5	0.0709485	-0.611146	-0.683007	1.16147e-11
ENSG00000198931.6	APRT	0.0219039	-0.455236	-0.477629	1.17116e-11
ENSG00000158941.12	CCAR2	-0.128906	-0.59053	-0.462173	1.1809e-11
ENSG00000110958.11	PTGES3	-0.025587	-0.723939	-0.699378	1.18205e-11
ENSG00000125818.13	PSMF1	-0.019195	-0.796785	-0.779393	1.20349e-11
ENSG00000100811.6	YY1	-0.00562838	-0.758542	-0.754612	1.21207e-11
ENSG00000172081.9	MOB3A	-0.0388452	-0.482694	-0.444198	1.23447e-11
ENSG00000094880.6	CDC23	-0.0695792	-1.02308	-0.956401	1.31595e-11
ENSG00000153922.6	CHD1	0.113559	-0.844545	-0.960686	1.31938e-11
ENSG00000180448.6	HMHA1	-0.0576316	-0.453447	-0.396199	1.4354e-11
ENSG00000122966.9	CIT	-0.17103	-1.03395	-0.865843	1.46783e-11
ENSG00000100911.9	PSME2	0.108536	-0.668961	-0.779045	1.5156e-11
ENSG00000164941.9	INTS8	0.12461	-0.667803	-0.794126	1.51989e-11
ENSG00000120253.9	NUP43	-0.180936	-1.05344	-0.875318	1.52934e-11
ENSG00000108826.11	MRPL27	-0.0200022	-1.02714	-1.01024	1.55465e-11
ENSG00000149485.12	FADS1	-0.249357	-0.847311	-0.598908	1.55805e-11
ENSG00000162664.12	ZNF326	0.125221	-0.977632	-1.10666	1.60391e-11
ENSG00000080371.4	RAB21	0.126932	-1.54253	-1.68229	1.69213e-11
ENSG00000100387.8	RBX1	0.130428	-0.648072	-0.779985	1.72137e-11
ENSG00000188554.9	NBR1	0.259752	-0.723482	-0.98527	1.75899e-11
ENSG00000065526.6	SPEN	0.0176996	-0.723616	-0.742771	1.80842e-11
ENSG00000087274.12	ADD1	0.0193642	-0.661759	-0.68198	1.82372e-11
ENSG00000125354.18	SEPT6	0.278498	-0.359081	-0.638168	1.9327e-11
ENSG00000158869.6	FCER1G	0.368289	-0.652076	-1.02284	2.00439e-11
ENSG00000166888.6	STAT6	0.216006	-0.353413	-0.57012	2.01748e-11
ENSG00000155508.9	CNOT8	0.237999	-0.663716	-0.903614	2.03393e-11
ENSG00000049860.9	HEXB	0.257621	-0.636492	-0.895583	2.17159e-11
ENSG00000099810.14	MTAP	0.140921	-1.11784	-1.26501	2.18316e-11
ENSG00000120948.11	TARDBP	0.00863611	-0.733138	-0.742939	2.26155e-11
ENSG00000164190.12	NIPBL	0.179608	-0.594743	-0.775958	2.26601e-11
ENSG00000127837.5	AAMP	-0.0592241	-0.652587	-0.594003	2.26601e-11
ENSG00000066135.8	KDM4A	0.252826	-0.509013	-0.762763	2.32771e-11
ENSG00000101558.9	VAPA	0.0470183	-0.730539	-0.779051	2.52366e-11
ENSG00000112695.7	COX7A2	0.0375566	-0.435178	-0.473153	2.55627e-11
ENSG00000114354.8	TFG	-0.0683651	-0.937415	-0.871552	2.59702e-11
ENSG00000141141.10	DDX52	0.136687	-0.859822	-0.999358	2.64304e-11
ENSG00000105851.6	PIK3CG	0.122454	-0.695145	-0.819481	2.72125e-11
ENSG00000104812.10	GYS1	-0.0430912	-0.604071	-0.561731	2.84119e-11
ENSG00000168288.8	MMADHC	0.00743415	-0.777607	-0.786605	2.8487e-11
ENSG00000105939.8	ZC3HAV1	0.0526044	-0.580623	-0.6342	2.86844e-11
ENSG00000075539.9	FRYL	0.229804	-0.599912	-0.831284	2.98037e-11
ENSG00000108528.9	SLC25A11	-0.0256312	-0.905003	-0.881943	2.99912e-11
ENSG00000130811.6	EIF3G	-0.00635005	-0.384664	-0.378664	2.99912e-11
ENSG00000095787.17	WAC	0.186955	-0.777607	-0.967656	3.20644e-11
ENSG00000108175.12	ZMIZ1	-0.081342	-0.817136	-0.737074	3.20644e-11
ENSG00000143149.8	ALDH9A1	-0.0228014	-0.738734	-0.717358	3.20644e-11
ENSG00000100412.11	ACO2	-0.0867381	-0.717124	-0.631527	3.2148e-11
ENSG00000135679.17	MDM2	0.882078	0.159199	-0.722269	3.27099e-11
ENSG00000164307.8	ERAP1	0.140257	-0.917537	-1.06162	3.27894e-11
ENSG00000021355.8	SERPINB1	0.196118	-0.424139	-0.620901	3.29795e-11
ENSG00000162909.13	CAPN2	0.221915	-0.41344	-0.635752	3.36615e-11
ENSG00000116044.11	NFE2L2	0.118245	-0.599462	-0.71896	3.37882e-11
ENSG00000122882.6	ECD	-0.050277	-1.05514	-1.00833	3.38751e-11
ENSG00000111011.13	RSRC2	0.102567	-0.945959	-1.05194	3.51615e-11
ENSG00000101407.8	TTI1	-0.16587	-1.09045	-0.928063	3.5688e-11
ENSG00000177697.13	CD151	-0.218405	-1.12029	-0.905164	3.57689e-11
ENSG00000198492.10	YTHDF2	-0.0317088	-0.747813	-0.717375	3.5973e-11
ENSG00000143761.9	ARF1	-0.0856054	-0.517021	-0.431739	3.77865e-11
ENSG00000104133.10	SPG11	0.201101	-0.479993	-0.681985	3.80133e-11
ENSG00000101191.12	DIDO1	-0.132428	-0.731804	-0.600321	3.85103e-11
ENSG00000126254.7	RBM42	-0.266235	-0.808098	-0.542995	4.01458e-11
ENSG00000124228.10	DDX27	0.165409	-0.495445	-0.661489	4.13237e-11
ENSG00000164244.16	PRRC1	-0.165859	-0.982003	-0.818432	4.42662e-11
ENSG00000198363.11	ASPH	0.35023	-0.833349	-1.18802	4.45258e-11
ENSG00000093010.7	COMT	0.015239	-0.441108	-0.456634	4.55427e-11
ENSG00000101911.8	PRPS2	-0.112481	-1.16506	-1.05715	4.71055e-11
ENSG00000140299.7	BNIP2	0.175769	-0.535159	-0.711875	4.71055e-11
ENSG00000125734.9	GPR108	0.0128058	-0.724125	-0.738169	4.71704e-11
ENSG00000171566.7	PLRG1	-0.0953395	-0.86148	-0.768148	4.7192e-11
ENSG00000182934.7	SRPR	-0.138452	-0.812031	-0.675053	4.72751e-11
ENSG00000198522.9	GPN1	0.00912054	-1.05445	-1.06753	4.73862e-11
ENSG00000014216.11	CAPN1	-0.0472281	-0.531691	-0.485106	4.79319e-11
ENSG00000110721.7	CHKA	0.118012	-0.954911	-1.07627	4.84671e-11
ENSG00000129515.14	SNX6	0.131334	-0.976916	-1.11205	5.0723e-11
ENSG00000132424.10	PNISR	0.308115	-0.584962	-0.894733	5.11405e-11
ENSG00000184445.7	KNTC1	-0.11712	-0.924711	-0.80935	5.16654e-11
ENSG00000067533.5	RRP15	0.0885845	-1.54749	-1.64822	5.16751e-11
ENSG00000058729.6	RIOK2	0.179986	-0.89812	-1.0822	5.2873e-11
ENSG00000100030.10	MAPK1	0.0994936	-0.59309	-0.693463	5.52777e-11
ENSG00000137876.5	RSL24D1	-0.0281626	-1.73696	-1.72445	5.53002e-11
ENSG00000128928.4	IVD	0.306845	-0.455082	-0.763074	5.56531e-11
ENSG00000106803.5	SEC61B	-0.0279747	-0.707023	-0.679995	5.63276e-11
ENSG00000101138.7	CSTF1	-0.225716	-1.11426	-0.892012	5.83572e-11
ENSG00000157456.3	CCNB2	-0.271791	-0.943756	-0.673318	5.99227e-11
ENSG00000143198.8	MGST3	0.00855937	-0.674124	-0.683547	6.22372e-11
ENSG00000130382.7	MLLT1	-0.0718826	-0.790991	-0.721049	6.23928e-11
ENSG00000115685.10	PPP1R7	0.0881535	-0.584962	-0.674142	6.28017e-11
ENSG00000163956.6	LRPAP1	0.198397	-0.228477	-0.426824	6.38844e-11
ENSG00000122705.12	CLTA	-0.0437959	-0.656948	-0.613921	6.54101e-11
ENSG00000168610.10	STAT3	0.113321	-0.631355	-0.746243	6.58575e-11
ENSG00000182899.10	RPL35A	-0.889324	-1.35423	-0.466203	6.68527e-11
ENSG00000099797.7	TECR	-0.0698952	-0.587946	-0.518749	6.70969e-11
ENSG00000162695.7	SLC30A7	0.185352	-0.962197	-1.15141	6.99817e-11
ENSG00000110107.4	PRPF19	-0.144155	-0.542084	-0.398221	6.99817e-11
ENSG00000105583.5	WDR83OS	-0.0403577	-0.928446	-0.890676	7.20646e-11
ENSG00000145703.11	IQGAP2	0.346979	-0.495527	-0.843593	7.23493e-11
ENSG00000038219.8	BOD1L1	0.10693	-0.719447	-0.828215	7.25594e-11
ENSG00000255112.2	CHMP1B	0.0524793	-0.958179	-1.01448	7.25771e-11
ENSG00000130755.8	GMFG	0.0754359	-0.25188	-0.327636	7.42177e-11
ENSG00000146463.7	ZMYM4	0.31222	-0.611146	-0.92497	7.59156e-11
ENSG00000186635.10	ARAP1	0.0773726	-0.57762	-0.655582	7.66532e-11
ENSG00000158710.10	TAGLN2	-0.162482	-0.508626	-0.346503	7.67165e-11
ENSG00000136813.10	KIAA0368	0.053411	-0.602299	-0.656843	7.70796e-11
ENSG00000124813.16	RUNX2	0.181981	-0.502985	-0.686061	7.79865e-11
ENSG00000110074.6	FOXRED1	-0.351954	-1.68536	-1.34265	7.84556e-11
ENSG00000141076.13	CIRH1A	0.00328634	-0.778532	-0.783893	7.95179e-11
ENSG00000184470.15	TXNRD2	0.0772153	-1.07529	-1.15656	7.96077e-11
ENSG00000135297.11	MTO1	0.166211	-0.591816	-0.758985	8.00539e-11
ENSG00000198730.3	CTR9	0.16578	-0.528694	-0.695328	8.02891e-11
ENSG00000160294.6	MCM3AP	0.0225783	-0.779499	-0.803884	8.14791e-11
ENSG00000073578.12	SDHA	0.106634	-0.415037	-0.521869	8.15427e-11
ENSG00000160410.10	SHKBP1	0.00802955	-0.492704	-0.501167	8.18114e-11
ENSG00000102241.7	HTATSF1	0.164931	-0.686245	-0.852706	8.33128e-11
ENSG00000001036.9	FUCA2	0.0514092	-0.75064	-0.803881	8.39851e-11
ENSG00000125755.14	SYMPK	-0.0674602	-0.508045	-0.441095	8.71487e-11
ENSG00000011485.10	PPP5C	-0.182855	-0.896021	-0.714945	9.09521e-11
ENSG00000008988.5	RPS20	0.0327251	-0.904652	-0.940306	9.1185e-11
ENSG00000021776.6	AQR	0.0353016	-0.67925	-0.715982	9.31378e-11
ENSG00000164022.12	AIMP1	0.135086	-0.606798	-0.74295	9.43142e-11
ENSG00000160208.11	RRP1B	-0.0321734	-1.08489	-1.05716	9.45663e-11
ENSG00000068878.10	PSME4	0.234523	-0.545236	-0.781297	9.48595e-11
ENSG00000037474.10	NSUN2	-0.0225885	-0.7295	-0.707973	9.5e-11
ENSG00000164327.8	RICTOR	0.120426	-1.38995	-1.52126	9.52245e-11
ENSG00000168883.15	USP39	-0.130046	-0.941897	-0.814085	9.6679e-11
ENSG00000100364.14	KIAA0930	0.0960873	-0.505528	-0.602237	9.70644e-11
ENSG00000138279.11	ANXA7	-0.0453111	-0.842899	-0.799345	9.9037e-11
ENSG00000154174.7	TOMM70A	0.0600103	-0.617384	-0.67879	9.94071e-11
ENSG00000137807.9	KIF23	-0.235015	-1.40439	-1.17551	1.00837e-10
ENSG00000066557.5	LRRC40	-0.0706471	-1.4199	-1.35758	1.01462e-10
ENSG00000166788.5	SAAL1	-0.19551	-1.46263	-1.27412	1.0366e-10
ENSG00000133858.11	ZFC3H1	0.27267	-0.927487	-1.2047	1.06329e-10
ENSG00000116459.6	ATP5F1	0.0717037	-0.475432	-0.547786	1.07255e-10
ENSG00000133884.5	DPF2	-0.0764178	-1.11548	-1.04297	1.07577e-10
ENSG00000135900.3	MRPL44	0.03558	-0.730393	-0.767678	1.08015e-10
ENSG00000136986.5	DERL1	-0.0509474	-0.779978	-0.730389	1.12051e-10
ENSG00000100243.16	CYB5R3	-0.0696727	-0.689245	-0.620835	1.13852e-10
ENSG00000033050.3	ABCF2	-0.0991723	-0.817136	-0.719386	1.17355e-10
ENSG00000065883.10	CDK13	-0.0328731	-0.752375	-0.721192	1.17509e-10
ENSG00000163960.7	UBXN7	0.160089	-1.17834	-1.34508	1.18068e-10
ENSG00000108829.9	LRRC59	-0.236151	-0.817136	-0.582307	1.18887e-10
ENSG00000174791.6	RIN1	-0.060903	-1.29418	-1.24067	1.18977e-10
ENSG00000116604.13	MEF2D	-0.135081	-0.592496	-0.457923	1.18977e-10
ENSG00000169136.4	ATF5	-0.323568	-1.4898	-1.17294	1.19565e-10
ENSG00000012963.9	UBR7	-0.109739	-1.15308	-1.04697	1.23255e-10
ENSG00000160221.12	C21orf33	0.113836	-0.545862	-0.660655	1.24638e-10
ENSG00000089639.6	GMIP	0.155133	-0.43082	-0.586289	1.24878e-10
ENSG00000164597.9	COG5	0.171083	-0.759736	-0.933142	1.25316e-10
ENSG00000109534.12	GAR1	0.0627358	-0.978938	-1.04512	1.25815e-10
ENSG00000112983.13	BRD8	0.0224031	-0.857981	-0.882702	1.26112e-10
ENSG00000139842.10	CUL4A	0.107054	-0.690795	-0.79937	1.33827e-10
ENSG00000105755.3	ETHE1	-0.0106768	-1.0282	-1.02083	1.33862e-10
ENSG00000136938.8	ANP32B	-0.112374	-0.798366	-0.687291	1.34541e-10
ENSG00000102763.11	VWA8	0.210888	-0.893084	-1.10794	1.35365e-10
ENSG00000112984.7	KIF20A	-0.219212	-0.962103	-0.744558	1.37328e-10
ENSG00000104093.9	DMXL2	0.376444	-0.72792	-1.10794	1.37536e-10
ENSG00000103994.12	ZNF106	0.22382	-0.457303	-0.68198	1.40456e-10
ENSG00000012061.11	ERCC1	0.0497827	-0.544139	-0.594676	1.4081e-10
ENSG00000108344.10	PSMD3	-0.186938	-0.687741	-0.501723	1.4081e-10
ENSG00000185049.8	NELFA	-0.111622	-1.12988	-1.02213	1.42314e-10
ENSG00000115806.8	GORASP2	-0.169803	-0.939627	-0.771621	1.43202e-10
ENSG00000159063.8	ALG8	-0.0203573	-0.771583	-0.752719	1.45485e-10
ENSG00000205302.2	SNX2	0.189845	-0.392046	-0.582392	1.47627e-10
ENSG00000110075.10	PPP6R3	0.114187	-0.526069	-0.640849	1.48794e-10
ENSG00000072310.12	SREBF1	-0.176487	-0.609701	-0.433906	1.50002e-10
ENSG00000065154.7	OAT	0.0752727	-0.720716	-0.797699	1.54285e-10
ENSG00000105176.13	URI1	0.0880419	-1.08746	-1.18074	1.55041e-10
ENSG00000113812.9	ACTR8	0.109182	-0.94429	-1.05723	1.55645e-10
ENSG00000170876.7	TMEM43	0.0636455	-0.683327	-0.74868	1.56821e-10
ENSG00000110719.5	TCIRG1	0.0854731	-0.423728	-0.509883	1.59184e-10
ENSG00000138078.11	PREPL	0.101388	-0.786169	-0.889733	1.5928e-10
ENSG00000139180.6	NDUFA9	0.00660279	-0.826281	-0.834722	1.67258e-10
ENSG00000185009.8	AP3M1	0.0717814	-0.687324	-0.760468	1.70825e-10
ENSG00000130640.9	TUBGCP2	0.018163	-0.676958	-0.696754	1.77421e-10
ENSG00000105339.6	DENND3	-0.0262434	-0.442128	-0.41636	1.81041e-10
ENSG00000134996.11	OSTF1	0.254638	-0.688641	-0.945193	1.81459e-10
ENSG00000170385.9	SLC30A1	0.136278	-1.27009	-1.41408	1.84971e-10
ENSG00000126461.10	SCAF1	-0.218844	-0.817325	-0.599598	1.87167e-10
ENSG00000198700.5	IPO9	-0.0982114	-0.83399	-0.737827	1.88897e-10
ENSG00000104960.11	PTOV1	-0.126092	-0.664278	-0.538647	1.89973e-10
ENSG00000086589.7	RBM22	0.0527826	-0.700439	-0.754464	1.9101e-10
ENSG00000011405.9	PIK3C2A	0.251605	-1.28951	-1.55079	1.94371e-10
ENSG00000158545.11	ZC3H18	-0.215884	-1.07251	-0.859179	1.9769e-10
ENSG00000116288.8	PARK7	-0.0107888	-0.47834	-0.468069	2.01227e-10
ENSG00000058804.10	NDC1	-0.22952	-1.19264	-0.967679	2.06695e-10
ENSG00000116001.11	TIA1	0.224286	-0.638401	-0.864623	2.07268e-10
ENSG00000115762.12	PLEKHB2	0.0599841	-0.518236	-0.578957	2.08737e-10
ENSG00000066777.4	ARFGEF1	0.240576	-0.510415	-0.751921	2.11159e-10
ENSG00000087470.13	DNM1L	0.105639	-0.879705	-0.988036	2.13654e-10
ENSG00000124172.5	ATP5E	0.215515	-0.46479	-0.681193	2.19168e-10
ENSG00000144136.6	SLC20A1	-0.425364	-1.29662	-0.875017	2.20609e-10
ENSG00000171861.6	RNMTL1	-0.0800375	-1.15433	-1.07884	2.26096e-10
ENSG00000097021.15	ACOT7	-0.343638	-1.13386	-0.792892	2.31259e-10
ENSG00000150961.10	SEC24D	-0.412414	-1.23581	-0.826534	2.40053e-10
ENSG00000196712.12	NF1	0.129207	-0.705816	-0.83676	2.42883e-10
ENSG00000172115.4	CYCS	-0.0277552	-0.816135	-0.79013	2.46453e-10
ENSG00000102738.6	MRPS31	-0.0178332	-1.10434	-1.09115	2.50203e-10
ENSG00000004700.11	RECQL	-0.13975	-0.941897	-0.804381	2.59972e-10
ENSG00000214078.7	CPNE1	0.190525	-0.30544	-0.49649	2.61467e-10
ENSG00000070669.12	ASNS	-0.595097	-1.83354	-1.24835	2.65561e-10
ENSG00000121892.10	PDS5A	0.133587	-0.459431	-0.593971	2.67469e-10
ENSG00000164818.11	HEATR2	-0.139871	-0.830075	-0.692073	2.68182e-10
ENSG00000060237.12	WNK1	0.00664902	-0.605922	-0.613708	2.68604e-10
ENSG00000185896.9	LAMP1	0.0838029	-0.297887	-0.381693	2.69947e-10
ENSG00000111786.4	SRSF9	0.0414897	-0.508572	-0.550915	2.70107e-10
ENSG00000135218.13	CD36	0.687153	-0.450661	-1.14015	2.74836e-10
ENSG00000101361.10	NOP56	-0.11215	-0.592038	-0.480567	2.74957e-10
ENSG00000042493.11	CAPG	0.150404	-0.239466	-0.390247	2.81082e-10
ENSG00000116209.7	TMEM59	0.139184	-0.451563	-0.591276	2.84038e-10
ENSG00000117394.15	SLC2A1	-0.0982885	-0.498422	-0.400551	2.86724e-10
ENSG00000024048.6	UBR2	0.133186	-0.64794	-0.783012	2.92721e-10
ENSG00000176102.7	CSTF3	0.128587	-0.553317	-0.683111	2.95601e-10
ENSG00000023516.7	AKAP11	0.182135	-0.584962	-0.768601	2.96964e-10
ENSG00000091009.6	RBM27	0.0618952	-0.744345	-0.808207	3.00683e-10
ENSG00000101447.9	FAM83D	-0.343166	-2	-1.67277	3.01443e-10
ENSG00000155629.10	PIK3AP1	0.0188565	-0.510518	-0.530244	3.09878e-10
ENSG00000119471.10	HSDL2	0.327634	-0.719892	-1.05015	3.10846e-10
ENSG00000137776.12	SLTM	0.120471	-0.673593	-0.795723	3.13589e-10
ENSG00000104388.10	RAB2A	0.147147	-0.745954	-0.895625	3.15932e-10
ENSG00000140694.12	PARN	-0.049503	-1.0902	-1.04455	3.16008e-10
ENSG00000116221.11	MRPL37	-0.198937	-0.908283	-0.711206	3.16008e-10
ENSG00000105726.12	ATP13A1	-0.00228704	-0.402474	-0.400555	3.16008e-10
ENSG00000138442.5	WDR12	0.029065	-0.766259	-0.796866	3.16543e-10
ENSG00000115286.15	NDUFS7	-0.127144	-0.643277	-0.516913	3.19582e-10
ENSG00000084072.12	PPIE	-0.136974	-1.04385	-0.910304	3.31297e-10
ENSG00000104823.4	ECH1	0.0948414	-0.296211	-0.391197	3.32655e-10
ENSG00000121552.3	CSTA	0.281514	-0.575502	-0.858691	3.33027e-10
ENSG00000136982.5	DSCC1	-0.350158	-1.6389	-1.29755	3.33199e-10
ENSG00000138085.12	ATRAID	0.0570906	-0.7856	-0.844561	3.33838e-10
ENSG00000155100.6	OTUD6B	0.0793961	-1.63471	-1.72991	3.38383e-10
ENSG00000065978.13	YBX1	0.137501	-0.870716	-1.01174	3.46002e-10
ENSG00000119541.5	VPS4B	0.112029	-0.626185	-0.739847	3.47971e-10
ENSG00000186834.2	HEXIM1	0.0700645	-0.965234	-1.03924	3.54153e-10
ENSG00000204843.8	DCTN1	0.0389357	-0.523308	-0.562669	3.58403e-10
ENSG00000158290.12	CUL4B	0.30116	-0.653675	-0.956882	3.59599e-10
ENSG00000100664.6	EIF5	0.0689967	-0.755895	-0.82721	3.62083e-10
ENSG00000152558.10	TMEM123	0.1776	-0.723938	-0.903873	3.64498e-10
ENSG00000105732.9	ZNF574	-0.116444	-0.944504	-0.830247	3.64498e-10
ENSG00000133028.6	SCO1	-0.00198306	-1.01042	-1.0118	3.66371e-10
ENSG00000004534.10	RBM6	0.108132	-0.830074	-0.940561	3.69724e-10
ENSG00000115548.12	KDM3A	0.116848	-0.517499	-0.634957	3.69724e-10
ENSG00000117385.11	LEPRE1	-0.0178289	-0.812373	-0.796336	3.76329e-10
ENSG00000075420.8	FNDC3B	-0.06104	-0.86507	-0.806027	3.82013e-10
ENSG00000130638.11	ATXN10	0.0997347	-0.462526	-0.562607	3.86449e-10
ENSG00000136521.8	NDUFB5	0.180685	-0.607682	-0.790263	3.97258e-10
ENSG00000128595.12	CALU	-0.215827	-1.03562	-0.822696	3.97757e-10
ENSG00000187555.10	USP7	0.0863629	-0.531069	-0.61813	3.97757e-10
ENSG00000090989.13	EXOC1	0.288734	-0.562313	-0.852441	4.01236e-10
ENSG00000108298.5	RPL19	0.130924	-0.195628	-0.32685	4.01236e-10
ENSG00000121741.12	ZMYM2	0.306958	-0.904842	-1.21657	4.05894e-10
ENSG00000130479.6	MAP1S	-0.0700646	-0.596808	-0.527703	4.09048e-10
ENSG00000140990.10	NDUFB10	0.15013	-0.817623	-0.970956	4.09271e-10
ENSG00000011260.9	UTP18	-0.0092103	-0.734858	-0.727056	4.1061e-10
ENSG00000169764.10	UGP2	0.11688	-0.498695	-0.616296	4.15971e-10
ENSG00000171204.8	TMEM126B	-0.0250745	-1.4458	-1.43159	4.20113e-10
ENSG00000183495.9	EP400	-0.101161	-0.727474	-0.627307	4.27728e-10
ENSG00000128815.13	WDFY4	0.0761543	-0.533823	-0.610823	4.32682e-10
ENSG00000173198.4	CYSLTR1	0.386069	-0.578862	-0.966782	4.34663e-10
ENSG00000085719.7	CPNE3	-0.0603443	-0.876851	-0.81865	4.40375e-10
ENSG00000115946.3	PNO1	-0.0557468	-1.41504	-1.36714	4.61618e-10
ENSG00000173193.9	PARP14	0.0751622	-0.840521	-0.918355	4.63257e-10
ENSG00000122779.12	TRIM24	0.108563	-0.663572	-0.773979	4.66544e-10
ENSG00000125691.8	RPL23	-0.626485	-1.07893	-0.453331	4.66544e-10
ENSG00000141959.12	PFKL	-0.130752	-0.485096	-0.354493	4.67412e-10
ENSG00000123146.15	CD97	-0.0303558	-0.337511	-0.307408	4.76407e-10
ENSG00000160194.13	NDUFV3	0.137385	-0.562791	-0.701556	4.8822e-10
ENSG00000117399.9	CDC20	-0.396127	-0.928917	-0.533968	4.91102e-10
ENSG00000069248.9	NUP133	-0.0222385	-0.620152	-0.598905	5.01117e-10
ENSG00000162688.11	AGL	0.198204	-1.15612	-1.36131	5.02381e-10
ENSG00000063177.8	RPL18	-0.82025	-1.10958	-0.289784	5.06469e-10
ENSG00000132953.12	XPO4	0.0212173	-0.793549	-0.817211	5.09756e-10
ENSG00000100028.7	SNRPD3	-0.0394723	-0.525461	-0.486656	5.13324e-10
ENSG00000124383.4	MPHOSPH10	0.140402	-1.03037	-1.17657	5.15035e-10
ENSG00000189079.11	ARID2	0.14291	-0.56916	-0.712967	5.24499e-10
ENSG00000112667.8	DNPH1	0.0393353	-0.913122	-0.955531	5.25301e-10
ENSG00000132603.9	NIP7	0.0234007	-0.923037	-0.94998	5.25525e-10
ENSG00000168710.13	AHCYL1	-0.0984374	-0.775293	-0.678031	5.36584e-10
ENSG00000104884.10	ERCC2	0.18887	-0.370982	-0.560603	5.43631e-10
ENSG00000170515.9	PA2G4	-0.212963	-0.947953	-0.737218	5.48712e-10
ENSG00000178913.5	TAF7	0.111558	-0.561311	-0.67412	5.55313e-10
ENSG00000150991.10	UBC	-0.193201	-0.676385	-0.483687	5.64477e-10
ENSG00000148834.8	GSTO1	0.118822	-0.354665	-0.474051	5.70284e-10
ENSG00000166401.9	SERPINB8	0.176895	-0.452792	-0.630443	5.79514e-10
ENSG00000175390.8	EIF3F	-0.13544	-0.931613	-0.798664	5.80042e-10
ENSG00000100304.12	TTLL12	-0.0687943	-0.611228	-0.543193	5.89145e-10
ENSG00000058272.11	PPP1R12A	0.121426	-0.50696	-0.628932	5.99535e-10
ENSG00000105053.6	VRK3	-0.0735896	-0.936574	-0.866176	6.09342e-10
ENSG00000119041.6	GTF3C3	0.0293328	-0.779733	-0.811055	6.23234e-10
ENSG00000101654.13	RNMT	0.0915431	-0.999999	-1.09651	6.38141e-10
ENSG00000174840.8	PDE12	-0.0757929	-0.930737	-0.858019	6.38141e-10
ENSG00000028528.10	SNX1	0.147808	-0.517162	-0.665942	6.96639e-10
ENSG00000103479.10	RBL2	0.0333224	-0.947532	-0.984203	7.01366e-10
ENSG00000113615.8	SEC24A	0.00430101	-0.924051	-0.931373	7.11277e-10
ENSG00000124198.8	ARFGEF2	0.102541	-0.999999	-1.10749	7.15473e-10
ENSG00000198034.6	RPS4X	-0.73913	-1.15597	-0.417945	7.163e-10
ENSG00000132591.7	ERAL1	-0.157011	-1.074	-0.920291	7.43998e-10
ENSG00000134108.8	ARL8B	0.0343409	-0.919829	-0.957687	7.63894e-10
ENSG00000155304.4	HSPA13	-0.32507	-1.1004	-0.778146	7.66114e-10
ENSG00000166803.6	KIAA0101	-0.332763	-0.943731	-0.612309	7.72454e-10
ENSG00000107758.11	PPP3CB	0.0897385	-1.14359	-1.24009	7.72693e-10
ENSG00000166855.5	CLPX	0.224132	-0.606855	-0.832845	7.73514e-10
ENSG00000172354.5	GNB2	-0.100756	-0.567787	-0.467478	7.74136e-10
ENSG00000128573.18	FOXP2	0.425012	-1.11103	-1.5466	7.75061e-10
ENSG00000101337.11	TM9SF4	0.0978407	-0.494558	-0.593274	7.82288e-10
ENSG00000198366.5	HIST1H3A	-0.405266	-0.958457	-0.554492	7.86389e-10
ENSG00000145191.7	EIF2B5	0.00162834	-0.741171	-0.744549	8.06657e-10
ENSG00000152223.8	EPG5	0.0647892	-1.16992	-1.24151	8.26748e-10
ENSG00000124767.6	GLO1	-0.604519	-1.61952	-1.02127	8.32171e-10
ENSG00000084070.7	SMAP2	0.239574	-0.421036	-0.661645	8.40673e-10
ENSG00000005483.15	KMT2E	0.0788388	-1.34958	-1.43798	8.43103e-10
ENSG00000110429.9	FBXO3	0.17713	-1.20353	-1.38884	8.54379e-10
ENSG00000160007.13	ARHGAP35	0.0905123	-0.942514	-1.03682	8.55454e-10
ENSG00000117289.7	TXNIP	0.224787	-0.353904	-0.578805	8.82321e-10
ENSG00000173273.11	TNKS	-0.0364786	-0.962525	-0.92893	9.04376e-10
ENSG00000165304.3	MELK	-0.326791	-1.58496	-1.26768	9.10278e-10
ENSG00000062650.13	WAPAL	0.203835	-0.580982	-0.786575	9.10278e-10
ENSG00000128311.9	TST	0.162252	-0.647426	-0.811113	9.25689e-10
ENSG00000159593.10	NAE1	0.0434585	-0.662462	-0.707128	9.39901e-10
ENSG00000239306.4	RBM14	-0.303673	-0.799596	-0.496881	9.39901e-10
ENSG00000134627.7	PIWIL4	0.184327	-0.610497	-0.796749	9.40949e-10
ENSG00000115128.6	SF3B14	-0.00615625	-0.887973	-0.884742	9.5568e-10
ENSG00000213741.4	RPS29	0.26258	-0.431234	-0.699239	9.59066e-10
ENSG00000100462.11	PRMT5	0.00378994	-0.511214	-0.515545	9.59066e-10
ENSG00000073969.14	NSF	0.192777	-0.576925	-0.770927	9.65354e-10
ENSG00000105171.5	POP4	-0.0575544	-0.733285	-0.677381	9.79104e-10
ENSG00000150093.14	ITGB1	0.07424	-0.667855	-0.743355	9.89071e-10
ENSG00000198554.7	WDHD1	-0.0504036	-0.981384	-0.934599	9.95561e-10
ENSG00000188486.3	H2AFX	-0.403762	-0.919581	-0.516838	9.97404e-10
ENSG00000138778.7	CENPE	-0.061045	-0.900989	-0.842767	1.00492e-09
ENSG00000204519.6	ZNF551	0.151305	-1.29373	-1.45408	1.00689e-09
ENSG00000120533.8	ENY2	0.172821	-0.54119	-0.71516	1.02723e-09
ENSG00000116586.7	LAMTOR2	0.228422	-0.481271	-0.710488	1.02989e-09
ENSG00000112294.8	ALDH5A1	-0.088298	-1.22239	-1.13978	1.04316e-09
ENSG00000122068.8	FYTTD1	0.288514	-0.741466	-1.03361	1.05593e-09
ENSG00000162676.7	GFI1	-0.0335722	-0.601593	-0.568748	1.06972e-09
ENSG00000176783.10	RUFY1	0.149949	-0.699245	-0.851011	1.09339e-09
ENSG00000120705.8	ETF1	0.0999066	-0.814785	-0.917308	1.10527e-09
ENSG00000120254.11	MTHFD1L	-0.0158485	-0.720617	-0.705966	1.10707e-09
ENSG00000126456.11	IRF3	-0.0860286	-0.735236	-0.650707	1.11289e-09
ENSG00000116133.7	DHCR24	-0.164732	-0.516917	-0.352374	1.12892e-09
ENSG00000105879.7	CBLL1	0.0803839	-0.917537	-1.00119	1.12974e-09
ENSG00000169139.7	UBE2V2	0.00635517	-0.925037	-0.934208	1.12974e-09
ENSG00000165704.10	HPRT1	-0.138607	-0.90092	-0.764392	1.16193e-09
ENSG00000067334.9	DNTTIP2	-0.00589687	-0.714439	-0.710258	1.16674e-09
ENSG00000196950.9	SLC39A10	0.0902726	-1.19994	-1.29728	1.17493e-09
ENSG00000099968.13	BCL2L13	0.102966	-0.912537	-1.01892	1.20965e-09
ENSG00000103249.13	CLCN7	0.200419	-0.394859	-0.595613	1.20965e-09
ENSG00000103490.13	PYCARD	0.156234	-0.294112	-0.450789	1.20965e-09
ENSG00000115364.9	MRPL19	0.00285026	-0.957564	-0.963615	1.22542e-09
ENSG00000110880.6	CORO1C	0.0653993	-0.543284	-0.609438	1.22737e-09
ENSG00000135655.9	USP15	0.202591	-0.511645	-0.715181	1.25626e-09
ENSG00000103769.5	RAB11A	0.168771	-0.533432	-0.703027	1.27514e-09
ENSG00000126067.7	PSMB2	-0.165795	-0.712512	-0.547747	1.31662e-09
ENSG00000108039.13	XPNPEP1	0.00400195	-0.648969	-0.654218	1.32342e-09
ENSG00000159176.9	CSRP1	-0.0348168	-0.807354	-0.774407	1.32409e-09
ENSG00000162819.7	BROX	0.107562	-0.833538	-0.943505	1.32437e-09
ENSG00000183808.7	RBM12B	0.18149	-0.779231	-0.963333	1.34205e-09
ENSG00000213983.7	AP1G2	0.31296	-0.913584	-1.23214	1.3733e-09
ENSG00000134851.8	TMEM165	0.123351	-1.11548	-1.24535	1.37994e-09
ENSG00000170581.9	STAT2	0.300904	-0.356391	-0.658303	1.39475e-09
ENSG00000171492.10	LRRC8D	0.116738	-0.830074	-0.950363	1.39515e-09
ENSG00000111639.3	MRPL51	-0.0316001	-0.807354	-0.777899	1.41927e-09
ENSG00000124486.8	USP9X	0.252338	-0.419225	-0.672508	1.44635e-09
ENSG00000136758.14	YME1L1	0.027055	-0.449244	-0.476616	1.47421e-09
ENSG00000147274.10	RBMX	-0.154028	-0.932885	-0.781208	1.48442e-09
ENSG00000163541.7	SUCLG1	0.00708008	-0.652076	-0.660649	1.49273e-09
ENSG00000007080.6	CCDC124	-0.202719	-0.906178	-0.705396	1.517e-09
ENSG00000103222.14	ABCC1	0.164422	-0.711373	-0.877682	1.53237e-09
ENSG00000214026.6	MRPL23	-0.000622685	-0.767022	-0.768483	1.53237e-09
ENSG00000113583.6	C5orf15	0.00283842	-1.04809	-1.05577	1.53319e-09
ENSG00000121210.11	KIAA0922	0.238417	-0.628905	-0.869362	1.54095e-09
ENSG00000128487.12	SPECC1	0.431913	-0.324063	-0.757127	1.62994e-09
ENSG00000143819.8	EPHX1	0.0706728	-1.11042	-1.18702	1.70201e-09
ENSG00000221914.4	PPP2R2A	-0.162534	-1.01577	-0.856193	1.70807e-09
ENSG00000132467.2	UTP3	0.146135	-0.633872	-0.781933	1.71216e-09
ENSG00000159399.5	HK2	-0.202435	-0.748021	-0.546454	1.7181e-09
ENSG00000153339.9	TRAPPC8	0.205385	-0.669851	-0.877632	1.74442e-09
ENSG00000105722.5	ERF	-0.0960776	-0.999999	-0.906765	1.77068e-09
ENSG00000113328.14	CCNG1	0.355967	-0.385122	-0.741772	1.77305e-09
ENSG00000198793.8	MTOR	0.0381003	-0.736965	-0.776671	1.79914e-09
ENSG00000159842.10	ABR	0.0261429	-0.532874	-0.559911	1.81171e-09
ENSG00000112096.12	SOD2	0.13113	-0.862496	-0.997452	1.85139e-09
ENSG00000145592.9	RPL37	-0.58908	-1.09913	-0.511271	1.87551e-09
ENSG00000100836.6	PABPN1	-0.0649404	-1.20945	-1.15094	1.90742e-09
ENSG00000143889.11	HNRNPLL	0.054728	-0.714597	-0.771261	1.931e-09
ENSG00000188994.8	ZNF292	0.105745	-0.896495	-1.00571	1.93799e-09
ENSG00000198042.6	MAK16	0.0115481	-0.913122	-0.927513	2.00527e-09
ENSG00000171960.6	PPIH	0.0309939	-0.790772	-0.823586	2.02528e-09
ENSG00000167792.7	NDUFV1	-0.0336994	-0.482062	-0.44899	2.02823e-09
ENSG00000168172.4	HOOK3	0.312996	-0.26	-0.573627	2.03964e-09
ENSG00000072571.15	HMMR	-0.215964	-0.941583	-0.727826	2.04242e-09
ENSG00000142541.12	RPL13A	-0.0870211	-0.503542	-0.417152	2.07752e-09
ENSG00000118939.13	UCHL3	0.314013	-1.29768	-1.62401	2.09431e-09
ENSG00000125356.6	NDUFA1	0.153611	-0.612976	-0.76803	2.09588e-09
ENSG00000127914.12	AKAP9	0.255954	-0.859822	-1.12037	2.19913e-09
ENSG00000165512.4	ZNF22	0.296819	-1.06817	-1.37266	2.22709e-09
ENSG00000175193.8	PARL	0.263189	-0.675727	-0.941897	2.26237e-09
ENSG00000198000.7	NOL8	0.193199	-0.692676	-0.887967	2.28043e-09
ENSG00000101367.8	MAPRE1	0.0958366	-0.479609	-0.576398	2.28043e-09
ENSG00000171310.6	CHST11	-0.0650358	-0.558731	-0.494248	2.29073e-09
ENSG00000159352.11	PSMD4	0.0013811	-0.604862	-0.607174	2.31078e-09
ENSG00000126777.13	KTN1	0.166743	-0.652076	-0.820557	2.35433e-09
ENSG00000100865.10	CINP	-0.0489851	-1.24793	-1.20615	2.35624e-09
ENSG00000198646.9	NCOA6	0.0362812	-1.07325	-1.11471	2.35667e-09
ENSG00000106261.12	ZKSCAN1	0.247582	-0.610588	-0.859834	2.35667e-09
ENSG00000149187.13	CELF1	0.0718291	-0.863497	-0.938792	2.45466e-09
ENSG00000093144.14	ECHDC1	0.149031	-0.484268	-0.634467	2.49094e-09
ENSG00000159202.13	UBE2Z	0.0207254	-0.879705	-0.903736	2.51034e-09
ENSG00000132604.6	TERF2	0.0860584	-0.783188	-0.872205	2.51796e-09
ENSG00000070061.10	IKBKAP	0.0612779	-0.739685	-0.80255	2.55704e-09
ENSG00000127184.6	COX7C	0.125301	-0.747612	-0.875385	2.59935e-09
ENSG00000173821.15	RNF213	0.205024	-0.477579	-0.683905	2.61483e-09
ENSG00000060749.10	QSER1	0.00994055	-1.28758	-1.30657	2.6523e-09
ENSG00000100365.10	NCF4	0.29494	-0.253756	-0.549134	2.66836e-09
ENSG00000186416.8	NKRF	0.0456318	-0.925999	-0.974802	2.67949e-09
ENSG00000062716.6	VMP1	0.249314	-0.488499	-0.738987	2.74857e-09
ENSG00000213064.5	SFT2D2	0.248412	-0.807354	-1.06009	2.76811e-09
ENSG00000106268.11	NUDT1	-0.0877299	-0.86844	-0.782639	2.78238e-09
ENSG00000172936.8	MYD88	0.27872	-0.948774	-1.23354	2.80679e-09
ENSG00000151835.9	SACS	0.049881	-0.814444	-0.866625	2.84245e-09
ENSG00000129566.8	TEP1	0.41371	-0.352106	-0.766717	2.89993e-09
ENSG00000094914.8	AAAS	-0.317389	-1.02237	-0.706825	2.9993e-09
ENSG00000110344.5	UBE4A	0.0414254	-0.614346	-0.656713	3.03613e-09
ENSG00000188846.9	RPL14	0.0661195	-0.349409	-0.415591	3.04132e-09
ENSG00000011028.9	MRC2	0.140935	-0.208765	-0.349979	3.10742e-09
ENSG00000091947.5	TMEM101	-0.0413308	-1.18688	-1.15104	3.12563e-09
ENSG00000141424.8	SLC39A6	0.288211	-0.626956	-0.917014	3.14705e-09
ENSG00000065328.12	MCM10	-0.389662	-1.17154	-0.784623	3.18819e-09
ENSG00000066422.4	ZBTB11	0.233138	-0.604458	-0.839781	3.19273e-09
ENSG00000132357.9	CARD6	0.27457	-1.47393	-1.76396	3.22291e-09
ENSG00000158435.3	CNOT11	-0.0416951	-0.882643	-0.843605	3.24569e-09
ENSG00000146476.6	C6orf211	0.109361	-1.01527	-1.13014	3.25663e-09
ENSG00000130164.7	LDLR	-0.24254	-0.642806	-0.400561	3.27047e-09
ENSG00000116957.8	TBCE	0.114111	-1.08746	-1.20846	3.28398e-09
ENSG00000144224.12	UBXN4	0.0317031	-0.709814	-0.743303	3.29834e-09
ENSG00000147586.5	MRPS28	0.0563625	-0.778872	-0.837933	3.36558e-09
ENSG00000118680.8	MYL12B	0.155194	-0.654503	-0.811454	3.38518e-09
ENSG00000213380.9	COG8	-0.049649	-1.31451	-1.27233	3.51535e-09
ENSG00000171320.10	ESCO2	-0.223891	-1.00685	-0.785275	3.51535e-09
ENSG00000165487.9	MICU2	0.159168	-0.614449	-0.775133	3.56305e-09
ENSG00000100804.14	PSMB5	-0.15705	-0.735543	-0.579623	3.56305e-09
ENSG00000100425.14	BRD1	-0.0406481	-1.08453	-1.04818	3.66809e-09
ENSG00000184047.11	DIABLO	0.168858	-0.985785	-1.15956	3.67929e-09
ENSG00000087253.7	LPCAT2	0.347154	-0.528176	-0.876641	3.72722e-09
ENSG00000156515.17	HK1	0.0986595	-0.549773	-0.649226	3.72861e-09
ENSG00000022277.8	RTFDC1	0.0783255	-0.438624	-0.517546	3.81948e-09
ENSG00000185198.7	PRSS57	-0.330421	-0.617409	-0.287344	3.84782e-09
ENSG00000161618.5	ALDH16A1	-0.272154	-0.851901	-0.58105	4.01436e-09
ENSG00000064933.12	PMS1	0.110701	-1.28293	-1.40314	4.03981e-09
ENSG00000076685.14	NT5C2	-0.0483915	-0.705379	-0.658275	4.03981e-09
ENSG00000027697.8	IFNGR1	0.253589	-0.590124	-0.845765	4.08283e-09
ENSG00000111641.6	NOP2	-0.0624225	-0.658719	-0.597025	4.09175e-09
ENSG00000122687.13	FTSJ2	0.23393	-0.594743	-0.830721	4.09707e-09
ENSG00000066336.7	SPI1	-0.0367207	-0.451696	-0.415154	4.212e-09
ENSG00000090060.13	PAPOLA	0.124139	-0.574978	-0.70069	4.24201e-09
ENSG00000123066.3	MED13L	0.124557	-0.625834	-0.752356	4.26008e-09
ENSG00000100154.10	TTC28	0.244401	-0.332575	-0.577456	4.37865e-09
ENSG00000167258.9	CDK12	0.0180899	-0.717269	-0.737241	4.40835e-09
ENSG00000162607.8	USP1	-0.115608	-1.08246	-0.970435	4.49779e-09
ENSG00000170836.7	PPM1D	0.263313	-0.826668	-1.09399	4.51492e-09
ENSG00000137944.12	CCBL2	0.104987	-0.724765	-0.831684	4.63804e-09
ENSG00000161980.5	POLR3K	-0.123148	-1.90046	-1.79897	4.71492e-09
ENSG00000104689.5	TNFRSF10A	0.175887	-1.09433	-1.27748	4.72362e-09
ENSG00000117054.9	ACADM	0.291853	-0.331409	-0.623616	4.72362e-09
ENSG00000162434.7	JAK1	0.107965	-0.575247	-0.684034	4.74172e-09
ENSG00000104714.9	ERICH1	0.178316	-1.07595	-1.26186	4.74463e-09
ENSG00000186185.9	KIF18B	-0.45525	-1.79441	-1.34877	4.76069e-09
ENSG00000123473.11	STIL	-0.190771	-1.16227	-0.975464	4.79909e-09
ENSG00000164961.11	KIAA0196	0.0274698	-0.717761	-0.746973	4.84982e-09
ENSG00000107164.15	FUBP3	0.105296	-0.66025	-0.767062	4.87898e-09
ENSG00000121486.7	TRMT1L	-0.0939239	-1.35364	-1.26766	4.96982e-09
ENSG00000087263.12	OGFOD1	-0.0240951	-0.923037	-0.901926	5.00761e-09
ENSG00000083642.14	PDS5B	0.150315	-0.512734	-0.664453	5.18517e-09
ENSG00000213614.5	HEXA	0.0720438	-0.630354	-0.703384	5.1951e-09
ENSG00000138750.10	NUP54	-0.0548936	-0.989804	-0.938309	5.21888e-09
ENSG00000123213.18	NLN	0.107571	-0.807354	-0.917222	5.31287e-09
ENSG00000136051.9	KIAA1033	0.257925	-0.483815	-0.743122	5.37634e-09
ENSG00000198951.7	NAGA	0.0541965	-0.528857	-0.583975	5.48608e-09
ENSG00000120868.9	APAF1	0.25775	-0.62496	-0.885088	5.53052e-09
ENSG00000116260.12	QSOX1	0.0458402	-0.447786	-0.494039	5.53838e-09
ENSG00000130770.13	ATPIF1	0.170068	-0.49825	-0.668974	5.58724e-09
ENSG00000100934.10	SEC23A	-0.0890019	-1.32931	-1.24821	5.61689e-09
ENSG00000206503.7	HLA-A	0.148261	-0.376969	-0.525679	5.67198e-09
ENSG00000147202.13	DIAPH2	0.229459	-0.792557	-1.02553	5.71196e-09
ENSG00000128789.16	PSMG2	0.0633032	-0.702456	-0.767217	5.71519e-09
ENSG00000154723.8	ATP5J	0.0981755	-0.572578	-0.671688	5.74e-09
ENSG00000013364.14	MVP	0.620748	-0.0506257	-0.671703	5.79088e-09
ENSG00000167468.12	GPX4	-0.0419114	-0.649092	-0.608347	5.86959e-09
ENSG00000143155.8	TIPRL	0.00335578	-1.05549	-1.0637	5.96464e-09
ENSG00000012048.15	BRCA1	-0.232311	-1.02975	-0.800257	6.06406e-09
ENSG00000242372.2	EIF6	-0.0628786	-0.574393	-0.511988	6.15312e-09
ENSG00000053900.6	ANAPC4	0.162014	-1.06711	-1.23506	6.23179e-09
ENSG00000143252.10	SDHC	0.0211216	-0.804983	-0.829242	6.23487e-09
ENSG00000084093.11	REST	0.160243	-0.653442	-0.815493	6.31736e-09
ENSG00000156136.5	DCK	0.129131	-0.807354	-0.939949	6.41454e-09
ENSG00000136122.11	BORA	-0.195863	-1.6746	-1.49054	6.55283e-09
ENSG00000179958.4	DCTPP1	-0.273776	-1.07957	-0.808349	6.58609e-09
ENSG00000104660.13	LEPROTL1	0.232392	-0.758027	-0.993481	6.64551e-09
ENSG00000064419.9	TNPO3	-0.125627	-0.850734	-0.72727	6.64714e-09
ENSG00000138814.12	PPP3CA	0.0170382	-0.722092	-0.740735	6.65692e-09
ENSG00000181192.7	DHTKD1	0.00113747	-0.93391	-0.938321	6.66224e-09
ENSG00000132002.3	DNAJB1	-0.277016	-1.07108	-0.796677	6.81603e-09
ENSG00000138433.11	CIR1	0.193134	-1.13327	-1.33547	6.93801e-09
ENSG00000159023.14	EPB41	0.0845946	-0.90689	-0.994829	6.96504e-09
ENSG00000132600.12	PRMT7	0.329271	-0.144597	-0.474069	7.04342e-09
ENSG00000135372.4	NAT10	-0.0709056	-0.530514	-0.460172	7.17272e-09
ENSG00000114850.2	SSR3	-0.141372	-0.842688	-0.703265	7.21487e-09
ENSG00000163660.7	CCNL1	0.208046	-1.10535	-1.32094	7.21838e-09
ENSG00000132963.7	POMP	-0.0137146	-0.507737	-0.494884	7.23394e-09
ENSG00000198836.4	OPA1	0.161805	-0.584962	-0.747923	7.52311e-09
ENSG00000169727.8	GPS1	-0.0487239	-0.554014	-0.506179	7.53868e-09
ENSG00000197837.3	HIST4H4	-0.30623	-0.969194	-0.665017	7.61348e-09
ENSG00000168758.6	SEMA4C	-0.0123807	-1.10362	-1.09684	7.64556e-09
ENSG00000175756.9	AURKAIP1	-0.0742023	-0.741265	-0.669164	7.68884e-09
ENSG00000048392.7	RRM2B	0.704618	-0.194647	-0.900246	7.78497e-09
ENSG00000025708.8	TYMP	0.634942	0.0601213	-0.574761	7.78497e-09
ENSG00000179295.11	PTPN11	0.0932727	-1.58494	-1.60135	7.86066e-09
ENSG00000109736.10	MFSD10	-0.112278	-0.542827	-0.431161	8.00056e-09
ENSG00000149923.9	PPP4C	-0.0764594	-0.614975	-0.539629	8.06378e-09
ENSG00000142892.10	PIGK	0.108817	-0.79886	-0.910244	8.13397e-09
ENSG00000115415.14	STAT1	0.0459787	-0.563667	-0.610601	8.13885e-09
ENSG00000163510.9	CWC22	2.28187e-08	-0.840521	-0.84363	8.1754e-09
ENSG00000150756.9	FAM173B	0.0611287	-1.76553	-1.84937	8.20299e-09
ENSG00000033178.8	UBA6	0.0195662	-0.721698	-0.743164	8.24871e-09
ENSG00000148396.14	SEC16A	-0.0730273	-0.515838	-0.443089	8.36427e-09
ENSG00000064607.12	SUGP2	0.180422	-0.5807	-0.762872	8.44553e-09
ENSG00000115211.11	EIF2B4	0.177318	-0.649312	-0.828684	8.45155e-09
ENSG00000055609.13	KMT2C	0.129603	-0.757429	-0.889973	8.47077e-09
ENSG00000101365.16	IDH3B	-0.0345683	-0.593679	-0.560204	8.47077e-09
ENSG00000166439.5	RNF169	0.157642	-1.03476	-1.1983	8.57212e-09
ENSG00000153879.4	CEBPG	-0.0477865	-1.51785	-1.4838	8.70561e-09
ENSG00000051108.10	HERPUD1	-0.106655	-0.69262	-0.58688	8.71577e-09
ENSG00000205758.7	CRYZL1	0.182433	-1.74723	-1.95146	8.73053e-09
ENSG00000132471.7	WBP2	-0.0979195	-0.640212	-0.543099	8.83867e-09
ENSG00000147133.11	TAF1	0.180216	-0.748938	-0.931649	8.95462e-09
ENSG00000177463.11	NR2C2	0.0350781	-1.72792	-1.78423	9.06701e-09
ENSG00000165688.7	PMPCA	-0.0419485	-0.578862	-0.537647	9.07493e-09
ENSG00000169375.11	SIN3A	-0.0184116	-0.562936	-0.545182	9.09138e-09
ENSG00000119655.4	NPC2	-0.0643717	-0.96393	-0.90293	9.14533e-09
ENSG00000155096.9	AZIN1	0.136451	-1.06711	-1.21003	9.1747e-09
ENSG00000125844.11	RRBP1	-0.0341723	-0.431157	-0.397426	9.18692e-09
ENSG00000198589.6	LRBA	0.191161	-0.839535	-1.03411	9.28636e-09
ENSG00000075131.5	TIPIN	-0.230198	-2.09953	-1.89275	9.39063e-09
ENSG00000138398.11	PPIG	0.00616922	-0.798366	-0.806862	9.46002e-09
ENSG00000171503.7	ETFDH	-0.139308	-1.72935	-1.60655	9.54834e-09
ENSG00000171793.9	CTPS1	-0.0907748	-0.696608	-0.606766	9.58911e-09
ENSG00000139428.7	MMAB	-0.132658	-1.43134	-1.30817	9.7519e-09
ENSG00000134574.7	DDB2	0.476524	-0.219566	-0.696505	9.79365e-09
ENSG00000071054.11	MAP4K4	0.333751	-0.498119	-0.833981	9.91055e-09
ENSG00000132912.8	DCTN4	0.0992847	-0.533915	-0.634415	1.03123e-08
ENSG00000147669.6	POLR2K	-0.0855979	-1.83289	-1.76712	1.03841e-08
ENSG00000122641.9	INHBA	-0.0930903	-1.31366	-1.22876	1.04099e-08
ENSG00000145569.5	FAM105A	0.569334	-0.917537	-1.49465	1.05161e-08
ENSG00000135336.10	ORC3	-0.159416	-1.50523	-1.35553	1.07064e-08
ENSG00000100994.7	PYGB	0.0579676	-0.642968	-0.702463	1.09236e-08
ENSG00000074695.5	LMAN1	-0.193515	-0.759333	-0.567225	1.11934e-08
ENSG00000173020.6	ADRBK1	-0.0684568	-0.575273	-0.507446	1.15658e-08
ENSG00000104805.11	NUCB1	-0.0497784	-0.428584	-0.379126	1.15675e-08
ENSG00000198189.6	HSD17B11	0.0482614	-0.517956	-0.567287	1.15725e-08
ENSG00000111615.8	KRR1	-0.106269	-1.01057	-0.9079	1.15726e-08
ENSG00000119396.6	RAB14	0.138206	-0.52053	-0.6602	1.16779e-08
ENSG00000189159.11	HN1	0.0766748	-0.521808	-0.59913	1.19495e-08
ENSG00000172053.10	QARS	-0.00883833	-0.440365	-0.43185	1.1957e-08
ENSG00000166483.6	WEE1	-0.270559	-1.15687	-0.889905	1.20966e-08
ENSG00000110934.6	BIN2	0.161038	-0.467126	-0.629228	1.21536e-08
ENSG00000026297.11	RNASET2	0.264843	-0.379192	-0.644844	1.22038e-08
ENSG00000168538.11	TRAPPC11	0.287988	-0.375699	-0.664508	1.22406e-08
ENSG00000134825.9	TMEM258	-0.125038	-0.758992	-0.635205	1.22767e-08
ENSG00000101639.14	CEP192	0.0844095	-0.749593	-0.835974	1.25843e-08
ENSG00000141101.8	NOB1	0.000550245	-0.773996	-0.777162	1.2743e-08
ENSG00000117410.9	ATP6V0B	-0.0289791	-0.656045	-0.628576	1.30099e-08
ENSG00000142185.12	TRPM2	0.135839	-0.3349	-0.471286	1.32775e-08
ENSG00000114416.13	FXR1	0.0922536	-0.553392	-0.646886	1.34765e-08
ENSG00000105676.9	ARMC6	-0.116754	-0.652076	-0.53595	1.37653e-08
ENSG00000213593.5	TMX2	0.0610615	-1.63743	-1.71681	1.37747e-08
ENSG00000162402.8	USP24	0.17813	-0.551985	-0.731957	1.39407e-08
ENSG00000143256.4	PFDN2	-0.095915	-0.86535	-0.771326	1.408e-08
ENSG00000134371.9	CDC73	0.167952	-0.888968	-1.06156	1.42741e-08
ENSG00000129636.8	ITFG1	0.2824	-1.02169	-1.31098	1.47463e-08
ENSG00000164332.6	UBLCP1	0.241695	-0.706952	-0.951075	1.47529e-08
ENSG00000198677.6	TTC37	0.213602	-0.496567	-0.711422	1.49402e-08
ENSG00000130749.5	ZC3H4	-0.218644	-0.825749	-0.608278	1.50602e-08
ENSG00000099219.9	ERMP1	0.128342	-0.472985	-0.602174	1.53952e-08
ENSG00000096060.10	FKBP5	-0.0582525	-1.01178	-0.957434	1.55153e-08
ENSG00000184428.8	TOP1MT	0.0241344	-0.67948	-0.705073	1.57186e-08
ENSG00000006744.14	ELAC2	-0.128918	-0.622859	-0.494753	1.57253e-08
ENSG00000198911.7	SREBF2	-0.138095	-0.52635	-0.388639	1.57735e-08
ENSG00000111364.11	DDX55	0.0427346	-1.16146	-1.21223	1.57763e-08
ENSG00000165502.6	RPL36AL	0.0880062	-0.690516	-0.780489	1.57763e-08
ENSG00000075426.7	FOSL2	0.0445301	-0.70543	-0.751617	1.57763e-08
ENSG00000101210.6	EEF1A2	-0.419234	-0.933766	-0.515799	1.61521e-08
ENSG00000119574.8	ZBTB45	-0.0878248	-1.05795	-0.974132	1.67075e-08
ENSG00000162104.5	ADCY9	0.184904	-0.529619	-0.715544	1.67347e-08
ENSG00000170275.10	CRTAP	-0.0640713	-1.18057	-1.12256	1.694e-08
ENSG00000182551.9	ADI1	0.133489	-0.573185	-0.707799	1.71153e-08
ENSG00000135723.9	FHOD1	-0.0485759	-0.851677	-0.805781	1.7374e-08
ENSG00000155876.4	RRAGA	-0.0660111	-0.833641	-0.769875	1.74612e-08
ENSG00000155368.12	DBI	0.341785	-0.106072	-0.447991	1.75924e-08
ENSG00000113194.8	FAF2	0.00783722	-0.884522	-0.895348	1.7626e-08
ENSG00000142197.8	DOPEY2	0.228085	-0.75064	-0.982444	1.79969e-08
ENSG00000156110.9	ADK	0.14182	-0.38882	-0.530967	1.83516e-08
ENSG00000108010.7	GLRX3	0.0369783	-0.858644	-0.898612	1.83914e-08
ENSG00000160949.12	TONSL	-0.282662	-0.855183	-0.573838	1.89281e-08
ENSG00000149313.6	AASDHPPT	0.136831	-0.631355	-0.770444	1.90541e-08
ENSG00000156030.8	ELMSAN1	0.0797246	-0.821402	-0.904529	1.90994e-08
ENSG00000166411.9	IDH3A	0.0916104	-0.707819	-0.801633	1.95043e-08
ENSG00000117593.8	DARS2	-0.358421	-1.01057	-0.654209	1.95712e-08
ENSG00000118246.9	FASTKD2	0.0911122	-0.643379	-0.736009	1.96508e-08
ENSG00000070814.13	TCOF1	-0.308992	-0.901085	-0.593688	1.98262e-08
ENSG00000168291.8	PDHB	0.216332	-0.32435	-0.541318	2.00902e-08
ENSG00000152061.17	RABGAP1L	0.133887	-0.715432	-0.852051	2.01022e-08
ENSG00000005007.8	UPF1	-0.022484	-0.416668	-0.394278	2.01537e-08
ENSG00000110906.8	KCTD10	0.0218918	-0.999999	-1.02624	2.03851e-08
ENSG00000178904.14	DPY19L3	0.234077	-1.14202	-1.38539	2.05193e-08
ENSG00000077514.4	POLD3	-0.164158	-1.1375	-0.978046	2.10257e-08
ENSG00000177602.4	GSG2	-0.461657	-2.14135	-1.69829	2.10752e-08
ENSG00000128059.4	PPAT	-0.0276644	-1.24998	-1.22986	2.12433e-08
ENSG00000148840.6	PPRC1	-0.181377	-0.922379	-0.743258	2.15644e-08
ENSG00000137073.16	UBAP2	0.0985151	-0.553392	-0.653344	2.21531e-08
ENSG00000073060.11	SCARB1	0.0665834	-0.531156	-0.598367	2.21552e-08
ENSG00000175305.12	CCNE2	0.0589714	-1.07325	-1.13735	2.24173e-08
ENSG00000114316.8	USP4	0.0836396	-0.526545	-0.611349	2.30388e-08
ENSG00000091039.12	OSBPL8	0.0511366	-0.916168	-0.971653	2.3144e-08
ENSG00000167881.10	SRP68	0.0314492	-0.539159	-0.5717	2.33798e-08
ENSG00000075089.5	ACTR6	3.97071e-08	-1.07325	-1.07932	2.35167e-08
ENSG00000165283.11	STOML2	-0.0938605	-0.741081	-0.648549	2.37003e-08
ENSG00000117625.9	RCOR3	0.194305	-1.926	-2.14991	2.37604e-08
ENSG00000033867.12	SLC4A7	0.298935	-1.10309	-1.41149	2.41483e-08
ENSG00000130764.5	LRRC47	0.0426943	-0.72289	-0.767553	2.46793e-08
ENSG00000126001.11	CEP250	-0.00880532	-1.0126	-1.00813	2.51174e-08
ENSG00000061794.8	MRPS35	0.0173675	-0.760329	-0.780302	2.52101e-08
ENSG00000135334.8	AKIRIN2	-0.145139	-1.42084	-1.28583	2.55287e-08
ENSG00000168116.9	KIAA1586	0.227432	-1.12775	-1.3658	2.57474e-08
ENSG00000125630.11	POLR1B	0.0974007	-0.540568	-0.639362	2.58391e-08
ENSG00000150779.7	TIMM8B	0.152153	-0.733213	-0.887601	2.72268e-08
ENSG00000084463.3	WBP11	-0.145154	-0.95842	-0.816377	2.73333e-08
ENSG00000119408.12	NEK6	-0.00603992	-0.731803	-0.727801	2.74391e-08
ENSG00000170802.11	FOXN2	0.177773	-0.851136	-1.03283	2.81511e-08
ENSG00000100316.11	RPL3	-0.672308	-0.997223	-0.325374	2.84014e-08
ENSG00000048544.5	MRPS10	-0.0195578	-1.38995	-1.38108	2.85042e-08
ENSG00000176340.3	COX8A	-0.0455285	-0.598637	-0.554218	2.8505e-08
ENSG00000131507.9	NDFIP1	0.159273	-0.572138	-0.732639	2.85735e-08
ENSG00000075151.15	EIF4G3	-0.525703	-1.25701	-0.734513	2.86096e-08
ENSG00000197386.6	HTT	0.107505	-0.544885	-0.653919	2.89647e-08
ENSG00000177105.9	RHOG	0.0797843	-0.596458	-0.677664	2.92224e-08
ENSG00000106868.12	SUSD1	0.314968	-0.350098	-0.666161	2.93223e-08
ENSG00000122299.7	ZC3H7A	0.0919187	-1.06413	-1.16152	2.94294e-08
ENSG00000156531.12	PHF6	0.0857806	-0.97143	-1.06166	3.00101e-08
ENSG00000032219.14	ARID4A	0.0785649	-1.0163	-1.10093	3.00125e-08
ENSG00000128731.11	HERC2	0.16176	-0.549915	-0.713213	3.03746e-08
ENSG00000112282.13	MED23	0.0826615	-0.785495	-0.870827	3.06113e-08
ENSG00000111596.7	CNOT2	0.171054	-0.593679	-0.766114	3.06436e-08
ENSG00000140983.9	RHOT2	-0.0308344	-0.667803	-0.638156	3.09944e-08
ENSG00000090520.6	DNAJB11	-0.144852	-0.871992	-0.729662	3.12461e-08
ENSG00000224982.2	TMEM233	0.518046	-2.39231	-2.98633	3.13458e-08
ENSG00000175105.5	ZNF654	0.167525	-1.80735	-2.00079	3.14658e-08
ENSG00000186432.4	KPNA4	0.0536533	-0.913288	-0.970834	3.1849e-08
ENSG00000140259.6	MFAP1	-0.00863736	-0.744958	-0.738293	3.18867e-08
ENSG00000119392.10	GLE1	-0.0964283	-0.68834	-0.592993	3.26798e-08
ENSG00000198265.7	HELZ	0.174665	-0.554312	-0.730524	3.28029e-08
ENSG00000132205.6	EMILIN2	0.0793244	-0.492844	-0.572983	3.36657e-08
ENSG00000167699.9	GLOD4	-0.0324865	-0.849859	-0.820335	3.41156e-08
ENSG00000187257.10	RSBN1L	0.126177	-0.90689	-1.0383	3.46213e-08
ENSG00000135363.7	LMO2	0.153572	-0.504792	-0.659385	3.48338e-08
ENSG00000215251.3	FASTKD5	-0.0207246	-0.884522	-0.867378	3.50632e-08
ENSG00000147854.12	UHRF2	0.138629	-0.754089	-0.895602	3.52112e-08
ENSG00000198231.8	DDX42	0.0740379	-0.526545	-0.601309	3.63952e-08
ENSG00000111581.5	NUP107	-0.206642	-0.78506	-0.580074	3.66132e-08
ENSG00000092108.16	SCFD1	0.165711	-0.724365	-0.89284	3.6893e-08
ENSG00000187239.12	FNBP1	0.196906	-0.427861	-0.62597	3.73813e-08
ENSG00000114054.9	PCCB	0.235275	-0.21283	-0.448594	3.83586e-08
ENSG00000133055.4	MYBPH	-0.151668	-0.551854	-0.400453	3.83586e-08
ENSG00000135596.13	MICAL1	0.0155711	-0.445488	-0.461293	3.89825e-08
ENSG00000029364.7	SLC39A9	0.22398	-0.579549	-0.805931	3.91699e-08
ENSG00000172809.8	RPL38	-0.81689	-1.30957	-0.494025	3.97354e-08
ENSG00000119777.14	TMEM214	-0.274251	-0.919978	-0.647843	4.0319e-08
ENSG00000100503.19	NIN	0.290932	-0.690671	-0.98559	4.06431e-08
ENSG00000184584.8	TMEM173	0.0612007	-0.445943	-0.507554	4.06473e-08
ENSG00000198826.6	ARHGAP11A	-0.0736918	-0.769219	-0.697095	4.08534e-08
ENSG00000160285.10	LSS	-0.0910653	-0.619519	-0.529112	4.09032e-08
ENSG00000067955.9	CBFB	0.0930039	-0.669026	-0.76381	4.11856e-08
ENSG00000106211.8	HSPB1	-0.189534	-0.684904	-0.496213	4.12241e-08
ENSG00000051620.6	HEBP2	-0.0993161	-1.17688	-1.08316	4.19816e-08
ENSG00000173418.7	NAA20	0.0652658	-0.855609	-0.924237	4.20571e-08
ENSG00000155097.7	ATP6V1C1	0.167945	-0.814444	-0.986285	4.22846e-08
ENSG00000110063.4	DCPS	0.00201779	-0.802963	-0.807031	4.24914e-08
ENSG00000117984.8	CTSD	0.096042	-0.38316	-0.479697	4.26309e-08
ENSG00000176953.6	NFATC2IP	-0.115227	-1.24793	-1.13981	4.33468e-08
ENSG00000155827.7	RNF20	0.152903	-0.725377	-0.881312	4.35343e-08
ENSG00000170266.11	GLB1	0.130507	-0.503021	-0.634887	4.39743e-08
ENSG00000169397.3	RNASE3	0.100824	-1.06711	-1.17452	4.42428e-08
ENSG00000061987.10	MON2	0.196887	-0.810965	-1.01125	4.52554e-08
ENSG00000117174.6	ZNHIT6	0.150805	-0.784987	-0.938841	4.57719e-08
ENSG00000181610.8	MRPS23	0.154641	-0.5807	-0.736674	4.57719e-08
ENSG00000197170.5	PSMD12	0.0154662	-0.678072	-0.695304	4.59001e-08
ENSG00000107959.11	PITRM1	0.0848889	-0.665882	-0.752676	4.60181e-08
ENSG00000151304.5	SRFBP1	0.0990213	-1.09433	-1.20109	4.60267e-08
ENSG00000118482.7	PHF3	0.0634175	-0.754887	-0.820612	4.60497e-08
ENSG00000105443.9	CYTH2	-0.036287	-1.20511	-1.17582	4.67153e-08
ENSG00000197969.7	VPS13A	0.172452	-0.822001	-0.997911	4.68445e-08
ENSG00000010322.11	NISCH	0.164448	-0.547487	-0.713235	4.80287e-08
ENSG00000114450.5	GNB4	0.0482475	-1.0973	-1.15184	4.82127e-08
ENSG00000088986.6	DYNLL1	0.0192811	-0.790281	-0.812126	4.84497e-08
ENSG00000132153.10	DHX30	-0.19791	-0.75517	-0.558322	4.84688e-08
ENSG00000130592.9	LSP1	0.0533748	-0.707218	-0.763137	4.92063e-08
ENSG00000086827.4	ZW10	-0.190948	-1.14839	-0.96216	4.93091e-08
ENSG00000087502.13	ERGIC2	-0.103262	-1.26628	-1.1707	5.07627e-08
ENSG00000104412.3	EMC2	-0.0253059	-0.999999	-0.978575	5.09335e-08
ENSG00000105063.14	PPP6R1	-0.0985688	-0.463093	-0.364929	5.09335e-08
ENSG00000164933.7	SLC25A32	-0.014377	-1.06413	-1.05583	5.10065e-08
ENSG00000100991.7	TRPC4AP	0.063111	-0.481533	-0.545223	5.11581e-08
ENSG00000167670.11	CHAF1A	-0.354138	-0.98388	-0.631943	5.17856e-08
ENSG00000104341.12	LAPTM4B	-0.246108	-2.49185	-2.28538	5.20944e-08
ENSG00000035403.12	VCL	0.0791916	-0.400377	-0.480334	5.23154e-08
ENSG00000135677.6	GNS	0.168752	-0.436099	-0.605989	5.26434e-08
ENSG00000119787.9	ATL2	0.0502984	-0.807354	-0.860371	5.41862e-08
ENSG00000138018.13	EPT1	0.0841131	-1.04836	-1.1384	5.43746e-08
ENSG00000143376.8	SNX27	0.045997	-0.999999	-1.05102	5.4624e-08
ENSG00000168411.9	RFWD3	-0.29879	-0.987289	-0.691102	5.49199e-08
ENSG00000133114.13	GPALPP1	-0.0707241	-1.56071	-1.50598	5.61691e-08
ENSG00000105793.11	GTPBP10	0.178769	-0.947532	-1.13232	5.67475e-08
ENSG00000186298.7	PPP1CC	-0.0290282	-0.587532	-0.55966	5.67702e-08
ENSG00000138399.13	FASTKD1	0.235282	-0.775293	-1.01399	5.69029e-08
ENSG00000138138.9	ATAD1	0.306648	-0.698344	-1.00913	5.7178e-08
ENSG00000129562.6	DAD1	-0.0782134	-0.602663	-0.52576	5.85975e-08
ENSG00000103642.7	LACTB	0.261089	-1.06817	-1.33793	5.99436e-08
ENSG00000122406.8	RPL5	-0.836217	-1.3695	-0.535489	6.00111e-08
ENSG00000196189.8	SEMA4A	0.191883	-0.337303	-0.52957	6.00111e-08
ENSG00000076770.10	MBNL3	0.209482	-1.20436	-1.42476	6.00445e-08
ENSG00000161533.7	ACOX1	0.340333	-0.341037	-0.682136	6.05576e-08
ENSG00000101417.7	PXMP4	-0.012611	-2.22239	-2.24855	6.08353e-08
ENSG00000197498.8	RPF2	-0.00472239	-0.948469	-0.947836	6.14094e-08
ENSG00000127311.5	HELB	0.392799	-0.626541	-1.02221	6.1815e-08
ENSG00000124193.10	SRSF6	-0.00526937	-0.449307	-0.444776	6.18404e-08
ENSG00000104518.6	GSDMD	-0.109474	-0.711967	-0.603675	6.23558e-08
ENSG00000114491.9	UMPS	-0.103389	-0.725825	-0.623655	6.31636e-08
ENSG00000073614.7	KDM5A	0.149977	-0.430891	-0.581564	6.32223e-08
ENSG00000117862.7	TXNDC12	-0.112951	-1.074	-0.965353	6.34835e-08
ENSG00000164209.12	SLC25A46	-0.0151054	-1.73696	-1.74307	6.36782e-08
ENSG00000099622.9	CIRBP	0.0473005	-0.480626	-0.528815	6.49969e-08
ENSG00000114779.15	ABHD14B	-0.206939	-1.14166	-0.938738	6.55715e-08
ENSG00000165392.5	WRN	0.062084	-1.11247	-1.18222	6.59478e-08
ENSG00000169567.7	HINT1	0.155497	-0.51911	-0.675709	6.61971e-08
ENSG00000143442.17	POGZ	-0.0305671	-0.706641	-0.67741	6.63698e-08
ENSG00000168724.10	DNAJC21	0.273594	-0.690671	-0.967156	6.6387e-08
ENSG00000176393.6	RNPEP	-0.0854179	-0.496174	-0.411259	6.71702e-08
ENSG00000143418.15	CERS2	-0.0524885	-0.647119	-0.596002	6.72643e-08
ENSG00000146094.9	DOK3	0.182661	-0.466699	-0.650777	6.8079e-08
ENSG00000139372.10	TDG	-0.0453781	-0.988125	-0.947228	6.81689e-08
ENSG00000163479.9	SSR2	-0.151166	-0.517135	-0.366525	6.86414e-08
ENSG00000146729.5	GBAS	0.160727	-1.05889	-1.22752	6.87834e-08
ENSG00000129103.13	SUMF2	0.00705803	-0.603821	-0.6122	6.87834e-08
[truncated: 3,857 more rows]

## Sheet: C16vsDMSO
Feature	Feature_gene_name	mRNA_log2FC	RPF_log2FC	log2FC_TE	FDR
ENSG00000075624.9	ACTB	0.211817	-0.208102	-0.419851	2.88134e-262
ENSG00000149925.12	ALDOA	0.0615828	-0.384957	-0.446628	2.66564e-140
ENSG00000122862.4	SRGN	0.201986	-0.206106	-0.408268	7.30427e-135
ENSG00000253729.3	PRKDC	-0.0849954	-0.61141	-0.526577	3.34223e-105
ENSG00000090382.2	LYZ	0.166603	-0.436024	-0.60278	4.33953e-105
ENSG00000169710.6	FASN	-0.0621083	-0.603582	-0.541436	5.92242e-104
ENSG00000111640.10	GAPDH	0.12405	-0.38239	-0.506325	2.01332e-102
ENSG00000196415.5	PRTN3	-0.207831	-0.701324	-0.4935	1.85147e-97
ENSG00000185624.10	P4HB	-0.00770903	-0.453562	-0.445779	9.71508e-94
ENSG00000153187.12	HNRNPU	0.0241322	-0.449147	-0.473362	1.67397e-88
ENSG00000110955.4	ATP5B	0.137144	-0.354155	-0.49152	3.79313e-88
ENSG00000074800.9	ENO1	-0.0663278	-0.394429	-0.328217	2.87137e-87
ENSG00000115053.11	NCL	-0.101997	-0.574741	-0.472613	4.9316e-81
ENSG00000172232.5	AZU1	0.0510648	-0.457765	-0.508924	1.33054e-79
ENSG00000005844.13	ITGAL	0.137215	-0.325863	-0.463229	3.31867e-78
ENSG00000102879.11	CORO1A	0.162174	-0.36891	-0.531143	7.80364e-76
ENSG00000197471.7	SPN	0.000820404	-0.585232	-0.586106	1.49168e-74
ENSG00000197766.3	CFD	0.146253	-0.431678	-0.577945	1.59234e-74
ENSG00000184357.3	HIST1H1B	-0.301412	-0.722126	-0.420894	5.54142e-74
ENSG00000105472.8	CLEC11A	0.0748041	-0.387775	-0.462783	4.32196e-73
ENSG00000100345.16	MYH9	0.138114	-0.31971	-0.457768	7.62477e-72
ENSG00000179218.9	CALR	-0.260741	-0.742125	-0.481651	1.01076e-65
ENSG00000130726.7	TRIM28	-0.0674949	-0.563824	-0.496276	3.86058e-65
ENSG00000197561.2	ELANE	-0.00768863	-0.699324	-0.691781	4.78796e-65
ENSG00000166710.13	B2M	0.147266	-0.467126	-0.61452	1.36546e-62
ENSG00000174231.12	PRPF8	0.10877	-0.329003	-0.437806	4.29453e-59
ENSG00000167978.12	SRRM2	-0.00503896	-0.529292	-0.524413	1.94467e-55
ENSG00000089280.14	FUS	-0.0337609	-0.473884	-0.440169	8.48199e-53
ENSG00000051523.6	CYBA	0.217228	-0.295838	-0.513187	1.7782e-52
ENSG00000011304.12	PTBP1	-0.124471	-0.633104	-0.5087	2.05824e-52
ENSG00000122566.16	HNRNPA2B1	-0.165719	-0.56771	-0.40224	2.8752e-52
ENSG00000126247.6	CAPNS1	0.15869	-0.528108	-0.686814	7.27428e-52
ENSG00000197111.11	PCBP2	0.130948	-0.540662	-0.671703	6.9384e-51
ENSG00000030582.12	GRN	0.307899	-0.238694	-0.546856	2.40429e-50
ENSG00000079246.11	XRCC5	0.00803674	-0.502656	-0.510868	2.08953e-49
ENSG00000172270.14	BSG	0.122221	-0.28029	-0.402726	3.91276e-49
ENSG00000072274.8	TFRC	-0.151284	-0.641324	-0.489972	4.03144e-49
ENSG00000141367.7	CLTC	0.0728177	-0.393078	-0.46584	5.68152e-47
ENSG00000152234.11	ATP5A1	0.0717007	-0.376148	-0.447737	7.59871e-47
ENSG00000026025.9	VIM	0.211783	-0.205293	-0.417111	2.58287e-46
ENSG00000104738.12	MCM4	-0.29375	-0.792002	-0.498647	3.20296e-46
ENSG00000080824.14	HSP90AA1	-0.138526	-0.618664	-0.480279	3.4774e-46
ENSG00000177156.6	TALDO1	0.0436929	-0.628538	-0.672691	8.5325e-46
ENSG00000019582.10	CD74	0.421219	-0.130345	-0.551712	9.02178e-45
ENSG00000110077.10	MS4A6A	0.366642	-0.337647	-0.704326	1.25376e-44
ENSG00000067225.13	PKM	-0.00502305	-0.44785	-0.442734	5.31302e-44
ENSG00000204628.7	GNB2L1	-0.472003	-0.840768	-0.368999	6.89393e-44
ENSG00000089597.12	GANAB	-0.00880991	-0.461862	-0.452995	1.02588e-43
ENSG00000113648.12	H2AFY	0.0409486	-0.585503	-0.626848	2.30709e-43
ENSG00000136997.10	MYC	0.151551	-0.356521	-0.507973	6.37356e-42
ENSG00000187837.2	HIST1H1C	-0.199319	-0.566919	-0.367789	1.0371e-41
ENSG00000234745.5	HLA-B	0.475128	-0.0545064	-0.529567	1.56055e-41
ENSG00000162511.7	LAPTM5	0.409876	-0.129036	-0.53894	1.92431e-41
ENSG00000075415.8	SLC25A3	0.0463632	-0.507823	-0.554224	3.17094e-41
ENSG00000137076.14	TLN1	0.0929952	-0.346348	-0.43924	2.77175e-40
ENSG00000159140.13	SON	0.0215049	-0.53831	-0.55981	4.49087e-40
ENSG00000063244.8	U2AF2	-0.0433613	-0.592096	-0.548865	5.2334e-39
ENSG00000124942.9	AHNAK	0.56386	0.163839	-0.399882	7.77475e-39
ENSG00000105568.13	PPP2R1A	0.0100896	-0.594275	-0.60478	2.33685e-38
ENSG00000105202.3	FBL	-0.0293368	-0.627446	-0.598203	3.10205e-38
ENSG00000166340.10	TPP1	0.221929	-0.312238	-0.534067	3.10205e-38
ENSG00000172531.10	PPP1CA	0.0620822	-0.666086	-0.728456	4.11156e-37
ENSG00000168298.4	HIST1H1E	-0.222043	-0.545791	-0.323657	4.75989e-37
ENSG00000135387.15	CAPRIN1	5.11819e-05	-0.530515	-0.530582	4.96897e-37
ENSG00000079459.8	FDFT1	0.0206226	-0.482023	-0.502599	6.52294e-37
ENSG00000130429.8	ARPC1B	0.0920329	-0.572399	-0.664748	3.31351e-36
ENSG00000203813.4	HIST1H3H	-0.34277	-0.753727	-0.411142	6.1877e-36
ENSG00000105220.10	GPI	0.0624751	-0.262359	-0.325069	6.67456e-36
ENSG00000139644.8	TMBIM6	-0.00527622	-0.517504	-0.512189	1.10832e-35
ENSG00000169564.5	PCBP1	0.0279989	-0.548079	-0.576387	2.88216e-35
ENSG00000166508.13	MCM7	-0.380689	-0.863479	-0.483147	2.89258e-35
ENSG00000121691.4	CAT	0.132954	-0.314732	-0.447751	6.78527e-35
ENSG00000163468.10	CCT3	-0.0570572	-0.560779	-0.503819	1.51444e-34
ENSG00000101439.4	CST3	0.440524	-0.0741156	-0.514788	1.69663e-34
ENSG00000115524.11	SF3B1	0.0602463	-0.432449	-0.492782	3.19839e-34
ENSG00000161547.10	SRSF2	0.0259508	-0.518965	-0.545245	1.21526e-33
ENSG00000096384.15	HSP90AB1	-0.0561258	-0.420108	-0.363993	7.94548e-33
ENSG00000116560.6	SFPQ	-0.00518477	-0.466863	-0.462019	4.06632e-32
ENSG00000104824.12	HNRNPL	0.00890841	-0.633095	-0.642598	1.31808e-31
ENSG00000099783.7	HNRNPM	-0.118078	-0.537952	-0.41992	5.31917e-31
ENSG00000127022.10	CANX	-0.161307	-0.524698	-0.3635	2.4079e-30
ENSG00000152518.5	ZFP36L2	-0.00773532	-0.870119	-0.863029	2.54095e-30
ENSG00000112697.11	TMEM30A	0.525309	-0.185182	-0.710373	5.9532e-30
ENSG00000136167.9	LCP1	-0.0175192	-0.344283	-0.326872	1.0784e-29
ENSG00000168036.12	CTNNB1	-0.00969125	-0.555309	-0.545801	1.32851e-29
ENSG00000118705.12	RPN2	0.0563926	-0.410248	-0.466817	2.29703e-29
ENSG00000111716.8	LDHB	-0.00783353	-0.410845	-0.403109	8.1974e-29
ENSG00000168066.16	SF1	-0.0647611	-0.653675	-0.589095	1.92045e-28
ENSG00000129351.13	ILF3	-0.0943579	-0.56656	-0.472553	2.02921e-28
ENSG00000137818.7	RPLP1	0.165253	-0.94656	-1.1136	2.3375e-28
ENSG00000078369.13	GNB1	0.0152453	-0.907685	-0.923873	3.04229e-28
ENSG00000196532.4	HIST1H3C	-0.282164	-0.634101	-0.352193	4.02163e-28
ENSG00000082898.12	XPO1	-0.104818	-0.741242	-0.637021	5.58009e-28
ENSG00000131238.12	PPT1	0.186525	-0.614278	-0.801555	7.45877e-28
ENSG00000105281.8	SLC1A5	-0.171579	-0.625151	-0.453902	8.32227e-28
ENSG00000100201.14	DDX17	0.188717	-0.300883	-0.489643	9.51176e-28
ENSG00000010244.12	ZNF207	0.18599	-0.393573	-0.579679	2.1903e-27
ENSG00000164754.8	RAD21	-0.193903	-0.792787	-0.599441	2.28817e-27
ENSG00000182676.4	PPP1R27	-0.0181119	-0.613413	-0.595611	2.8746e-27
ENSG00000132182.7	NUP210	0.0566181	-0.403418	-0.46013	3.81434e-27
ENSG00000100448.3	CTSG	-0.171224	-0.87599	-0.705549	5.96687e-27
ENSG00000183207.8	RUVBL2	0.0410226	-0.44268	-0.483875	6.15065e-27
ENSG00000057608.12	GDI2	-0.0186653	-0.559495	-0.540983	6.44057e-27
ENSG00000124207.12	CSE1L	-0.0840948	-0.706437	-0.622565	7.61269e-27
ENSG00000084207.11	GSTP1	0.0928929	-0.395063	-0.488356	7.61269e-27
ENSG00000110651.7	CD81	0.0940574	-0.482437	-0.576696	1.02546e-26
ENSG00000244038.5	DDOST	0.0693123	-0.367209	-0.436829	1.34517e-26
ENSG00000131747.10	TOP2A	-0.227969	-0.668626	-0.440907	3.1355e-26
ENSG00000125835.13	SNRPB	-0.75494	-1.41858	-0.664439	5.19373e-26
ENSG00000188229.5	TUBB4B	-0.215796	-0.687591	-0.472081	5.67267e-26
ENSG00000104408.5	EIF3E	0.0189811	-0.490177	-0.509586	1.03769e-25
ENSG00000015479.13	MATR3	0.0576825	-0.478699	-0.536686	1.35963e-25
ENSG00000010256.6	UQCRC1	0.0796406	-0.471043	-0.551143	2.28698e-25
ENSG00000088247.11	KHSRP	-0.179913	-0.713139	-0.533488	2.30274e-25
ENSG00000163399.11	ATP1A1	-0.0409854	-0.533228	-0.492369	2.34524e-25
ENSG00000009307.11	CSDE1	0.0155137	-0.472895	-0.488581	3.83991e-25
ENSG00000256316.1	HIST1H3F	-0.363814	-0.748752	-0.385226	4.04322e-25
ENSG00000160255.12	ITGB2	0.170056	-0.261321	-0.431644	4.99207e-25
ENSG00000116604.13	MEF2D	-0.0737216	-0.834534	-0.761351	5.2976e-25
ENSG00000130816.10	DNMT1	-0.181037	-0.638175	-0.457377	7.62687e-25
ENSG00000005893.11	LAMP2	0.119397	-0.45493	-0.574409	8.4568e-25
ENSG00000145287.6	PLAC8	0.191139	-0.21691	-0.408222	1.45896e-24
ENSG00000166794.4	PPIB	-0.0565497	-0.522852	-0.466353	1.53887e-24
ENSG00000123338.8	NCKAP1L	0.298105	-0.159989	-0.457936	1.7589e-24
ENSG00000124575.5	HIST1H1D	-0.403886	-0.885667	-0.482368	1.82562e-24
ENSG00000152601.13	MBNL1	0.130916	-0.532732	-0.663812	2.18774e-24
ENSG00000108561.4	C1QBP	0.0267288	-0.454222	-0.481227	2.1948e-24
ENSG00000147065.12	MSN	-0.078904	-0.430084	-0.351225	3.22134e-24
ENSG00000123416.11	TUBA1B	-0.143348	-0.753506	-0.610799	4.29865e-24
ENSG00000166226.8	CCT2	-0.154502	-0.617558	-0.463088	5.1948e-24
ENSG00000138095.14	LRPPRC	0.19311	-0.249482	-0.442483	5.97403e-24
ENSG00000143870.8	PDIA6	-0.166498	-0.638577	-0.472299	9.7768e-24
ENSG00000197061.3	HIST1H4C	-0.336266	-0.68749	-0.351229	1.1438e-23
ENSG00000189091.8	SF3B3	-0.539756	-1.04276	-0.503589	1.20269e-23
ENSG00000170348.4	TMED10	0.0517188	-0.546224	-0.598363	1.23324e-23
ENSG00000182054.5	IDH2	-0.0138981	-0.628712	-0.61541	1.23472e-23
ENSG00000114353.12	GNAI2	0.107669	-0.441587	-0.549422	1.54195e-23
ENSG00000104904.8	OAZ1	0.00965671	-0.506003	-0.515945	1.98432e-23
ENSG00000105810.5	CDK6	0.0503713	-0.744161	-0.795063	2.31779e-23
ENSG00000137497.13	NUMA1	0.135211	-0.47022	-0.605545	3.34171e-23
ENSG00000169223.10	LMAN2	0.0530118	-0.617714	-0.67103	5.04321e-23
ENSG00000023191.12	RNH1	0.00128298	-0.393516	-0.395132	5.04321e-23
ENSG00000167986.9	DDB1	0.115562	-0.338571	-0.454289	5.37919e-23
ENSG00000165672.5	PRDX3	0.0223398	-0.488769	-0.511206	5.53895e-23
ENSG00000110321.11	EIF4G2	0.012876	-0.507498	-0.520709	7.48698e-23
ENSG00000116133.7	DHCR24	-0.0558971	-0.624013	-0.568416	1.07373e-22
ENSG00000156261.8	CCT8	-0.095624	-0.503978	-0.408672	1.07584e-22
ENSG00000093010.7	COMT	0.0909167	-0.602572	-0.694046	1.21936e-22
ENSG00000197157.6	SND1	0.0021448	-0.450477	-0.452745	1.24357e-22
ENSG00000138668.14	HNRNPD	-0.131957	-0.616511	-0.484829	1.48982e-22
ENSG00000197153.3	HIST1H3J	-0.348984	-0.76332	-0.414383	1.98715e-22
ENSG00000177733.4	HNRNPA0	-0.101556	-0.693376	-0.592446	2.72016e-22
ENSG00000105669.8	COPE	0.0688749	-0.403355	-0.472166	2.90185e-22
ENSG00000123136.10	DDX39A	-0.141043	-0.652827	-0.512222	3.34425e-22
ENSG00000140968.6	IRF8	0.102745	-0.314924	-0.417591	4.34388e-22
ENSG00000163902.7	RPN1	-0.0552007	-0.47753	-0.422697	5.85663e-22
ENSG00000172354.5	GNB2	0.0478242	-0.692542	-0.740821	5.98677e-22
ENSG00000072110.9	ACTN1	0.0341142	-0.386867	-0.421013	7.44179e-22
ENSG00000104853.11	CLPTM1	0.0688488	-0.609794	-0.679234	7.56071e-22
ENSG00000108883.8	EFTUD2	0.0273647	-0.538379	-0.566227	8.1681e-22
ENSG00000100297.11	MCM5	-0.342678	-0.785681	-0.443438	1.13777e-21
ENSG00000109861.11	CTSC	0.106609	-0.487817	-0.594568	1.27234e-21
ENSG00000106263.13	EIF3B	0.0231452	-0.473302	-0.496464	1.89768e-21
ENSG00000044574.7	HSPA5	-0.374642	-0.724473	-0.349866	1.98433e-21
ENSG00000169813.12	HNRNPF	-0.230852	-0.635385	-0.404899	2.76718e-21
ENSG00000135316.13	SYNCRIP	-0.023261	-0.678994	-0.656507	2.8286e-21
ENSG00000107581.8	EIF3A	-0.0611011	-0.456996	-0.396206	3.19543e-21
ENSG00000063177.8	RPL18	-0.691881	-1.13531	-0.443943	3.7098e-21
ENSG00000179820.11	MYADM	-0.0122444	-0.420812	-0.408821	4.00144e-21
ENSG00000169554.12	ZEB2	0.155169	-0.493764	-0.649297	5.07411e-21
ENSG00000130402.7	ACTN4	0.0580719	-0.304236	-0.362544	5.64374e-21
ENSG00000183283.11	DAZAP2	0.0977066	-0.402098	-0.49983	5.7055e-21
ENSG00000135829.12	DHX9	-0.0964856	-0.549952	-0.453854	5.74459e-21
ENSG00000130175.5	PRKCSH	-0.122687	-0.513471	-0.390819	6.19921e-21
ENSG00000134900.7	TPP2	0.148	-0.511713	-0.660456	7.31926e-21
ENSG00000112576.8	CCND3	-0.0697071	-0.718007	-0.648771	7.67734e-21
ENSG00000144028.10	SNRNP200	0.0886795	-0.321421	-0.41034	8.00021e-21
ENSG00000111605.12	CPSF6	0.0685848	-0.664673	-0.733783	8.83305e-21
ENSG00000092010.10	PSME1	0.118415	-0.462651	-0.581436	1.24934e-20
ENSG00000115484.10	CCT4	-0.822071	-1.33117	-0.509579	1.31154e-20
ENSG00000186480.8	INSIG1	-0.0590489	-0.674361	-0.615942	1.32068e-20
ENSG00000166428.8	PLD4	0.427972	-0.0331999	-0.461036	1.57735e-20
ENSG00000185198.7	PRSS57	-0.14781	-0.59384	-0.446302	1.85225e-20
ENSG00000149136.3	SSRP1	-0.177814	-0.709642	-0.532224	1.91921e-20
ENSG00000148154.5	UGCG	0.0980182	-0.494264	-0.592643	2.17226e-20
ENSG00000180573.8	HIST1H2AC	-0.213133	-0.635502	-0.422672	2.25404e-20
ENSG00000164104.7	HMGB2	-0.295813	-0.81111	-0.515698	2.46694e-20
ENSG00000136527.13	TRA2B	-0.0639843	-0.638472	-0.574943	2.83637e-20
ENSG00000162613.12	FUBP1	-0.102843	-0.835315	-0.733327	3.01616e-20
ENSG00000066044.9	ELAVL1	-0.105518	-0.771085	-0.666161	3.717e-20
ENSG00000129003.11	VPS13C	0.367556	-0.378161	-0.746262	3.74071e-20
ENSG00000129128.8	SPCS3	-0.0831957	-1.08809	-1.0067	7.38152e-20
ENSG00000089157.11	RPLP0	0.195759	-0.95858	-1.15668	7.64163e-20
ENSG00000109606.8	DHX15	-0.0624009	-0.589081	-0.527207	9.48735e-20
ENSG00000010292.8	NCAPD2	-0.248282	-0.747478	-0.499574	1.08678e-19
ENSG00000168906.8	MAT2A	0.0147495	-0.58826	-0.603577	1.18569e-19
ENSG00000143815.10	LBR	-0.0665218	-0.76471	-0.699005	1.20761e-19
ENSG00000178035.7	IMPDH2	0.0785249	-0.317755	-0.396588	1.26071e-19
ENSG00000120802.9	TMPO	-0.253626	-0.894647	-0.641565	1.26925e-19
ENSG00000178952.4	TUFM	0.00502672	-0.499186	-0.504342	2.13925e-19
ENSG00000196419.8	XRCC6	-0.0769034	-0.563136	-0.486717	2.97366e-19
ENSG00000182944.13	EWSR1	0.0345467	-0.471908	-0.506611	3.49069e-19
ENSG00000137462.6	TLR2	0.32523	-0.38677	-0.712467	4.21328e-19
ENSG00000179091.4	CYC1	-0.00289999	-0.456779	-0.454264	5.0091e-19
ENSG00000183684.6	ALYREF	-0.0729137	-0.625658	-0.553275	5.55629e-19
ENSG00000116478.7	HDAC1	0.119711	-0.514573	-0.634982	5.69666e-19
ENSG00000143569.14	UBAP2L	0.0482917	-0.495957	-0.54483	6.39787e-19
ENSG00000159840.11	ZYX	-0.0403955	-0.497186	-0.456877	6.94185e-19
ENSG00000121774.13	KHDRBS1	-0.0722637	-0.537965	-0.46615	8.11327e-19
ENSG00000139163.11	ETNK1	0.268322	-0.764896	-1.03517	1.04323e-18
ENSG00000175216.10	CKAP5	-0.0999307	-0.659552	-0.560136	1.15177e-18
ENSG00000042493.11	CAPG	0.258604	-0.300866	-0.559859	1.31002e-18
ENSG00000165280.11	VCP	-0.0303709	-0.395975	-0.365777	1.48344e-18
ENSG00000158864.8	NDUFS2	0.173841	-0.333354	-0.507486	1.77243e-18
ENSG00000165629.15	ATP5C1	0.0747505	-0.527876	-0.603045	1.87751e-18
ENSG00000138363.10	ATIC	-0.0144589	-0.61324	-0.599479	1.88108e-18
ENSG00000165678.15	GHITM	0.0442127	-0.519727	-0.564475	2.34975e-18
ENSG00000127837.5	AAMP	-0.00433132	-0.787846	-0.784767	2.58907e-18
ENSG00000149516.9	MS4A3	0.0881125	-0.504086	-0.592633	2.62872e-18
ENSG00000105355.4	PLIN3	0.164165	-0.323155	-0.48753	2.78199e-18
ENSG00000062822.8	POLD1	-0.183309	-0.767166	-0.584279	2.93003e-18
ENSG00000133055.4	MYBPH	0.0149814	-0.625457	-0.64097	3.20271e-18
ENSG00000076003.4	MCM6	-0.406379	-0.855449	-0.44961	3.44353e-18
ENSG00000136628.13	EPRS	-0.0829271	-0.543872	-0.461098	3.78174e-18
ENSG00000113575.5	PPP2CA	-0.126104	-0.922757	-0.797635	5.03103e-18
ENSG00000167613.11	LAIR1	-1.97519	-0.240433	1.73528	5.08743e-18
ENSG00000161847.9	RAVER1	-0.0572346	-0.715432	-0.65887	5.51357e-18
ENSG00000099995.14	SF3A1	-0.040665	-0.571804	-0.531639	6.52379e-18
ENSG00000104823.4	ECH1	0.196962	-0.348112	-0.545264	6.65223e-18
ENSG00000111348.4	ARHGDIB	0.174697	-0.15888	-0.333613	6.90264e-18
ENSG00000140740.6	UQCRC2	0.084146	-0.40739	-0.491722	7.1448e-18
ENSG00000128708.8	HAT1	-0.159445	-0.763357	-0.604755	7.1526e-18
ENSG00000101444.8	AHCY	0.0414596	-0.507827	-0.549484	7.54923e-18
ENSG00000010610.5	CD4	0.335903	-0.133266	-0.469298	7.66447e-18
ENSG00000084234.12	APLP2	0.109498	-0.28744	-0.39707	1.17917e-17
ENSG00000127603.19	MACF1	0.160888	-0.303806	-0.464625	1.36038e-17
ENSG00000159131.12	GART	-0.0937595	-0.638276	-0.54494	1.42358e-17
ENSG00000161016.11	RPL8	-0.518999	-0.809146	-0.290234	1.56439e-17
ENSG00000213024.6	NUP62	-0.0833582	-0.648756	-0.566112	1.7151e-17
ENSG00000131236.12	CAP1	0.0438356	-0.382976	-0.426787	1.81875e-17
ENSG00000095319.10	NUP188	-0.150294	-0.801528	-0.652218	1.85635e-17
ENSG00000125304.8	TM9SF2	0.185911	-0.263343	-0.449163	1.90058e-17
ENSG00000100823.7	APEX1	0.0197601	-0.37351	-0.393237	1.92797e-17
ENSG00000143321.14	HDGF	-0.0304041	-0.883486	-0.854473	1.95797e-17
ENSG00000100300.13	TSPO	0.118111	-0.426987	-0.545138	2.04268e-17
ENSG00000064666.10	CNN2	0.244629	-0.348645	-0.59376	2.1768e-17
ENSG00000078668.9	VDAC3	-0.0613147	-0.596692	-0.536036	2.50122e-17
ENSG00000073111.9	MCM2	-0.311626	-0.695677	-0.38452	2.55673e-17
ENSG00000117632.16	STMN1	-0.219989	-0.599838	-0.380166	2.70533e-17
ENSG00000158406.2	HIST1H4H	-0.318156	-0.58689	-0.26897	2.9167e-17
ENSG00000076944.10	STXBP2	0.165962	-0.370873	-0.536853	3.00022e-17
ENSG00000141522.7	ARHGDIA	-0.0576052	-0.587886	-0.530949	3.86036e-17
ENSG00000100504.12	PYGL	-0.280614	-0.741908	-0.461514	4.14492e-17
ENSG00000048740.13	CELF2	-0.00603468	-0.547329	-0.54162	4.71655e-17
ENSG00000129083.8	COPB1	0.0542161	-0.554042	-0.608906	4.73555e-17
ENSG00000113810.11	SMC4	-0.155848	-0.661002	-0.505461	4.82743e-17
ENSG00000178982.5	EIF3K	0.00793199	-0.43402	-0.441958	4.90934e-17
ENSG00000105323.12	HNRNPUL1	-0.138924	-0.594361	-0.455813	4.92064e-17
ENSG00000138071.9	ACTR2	0.0539448	-0.342261	-0.396161	5.4904e-17
ENSG00000134294.9	SLC38A2	-0.0637845	-0.680063	-0.616626	5.77134e-17
ENSG00000101347.7	SAMHD1	0.533536	0.112395	-0.420935	5.77134e-17
ENSG00000256018.1	HIST1H3G	-0.319287	-0.719952	-0.400758	6.04735e-17
ENSG00000108604.11	SMARCD2	0.128089	-0.557995	-0.686975	7.21016e-17
ENSG00000056097.11	ZFR	-0.0615131	-0.59428	-0.533285	7.56269e-17
ENSG00000104549.7	SQLE	-0.0195208	-0.589408	-0.570296	7.6368e-17
ENSG00000118513.14	MYB	-0.060751	-0.587971	-0.527644	7.6368e-17
ENSG00000111642.10	CHD4	-0.0535076	-0.471134	-0.417937	7.6368e-17
ENSG00000159377.6	PSMB4	0.012403	-0.531928	-0.54492	8.63666e-17
ENSG00000158941.12	CCAR2	-0.0186056	-0.580523	-0.562189	9.55811e-17
ENSG00000196305.13	IARS	-0.113526	-0.599062	-0.485939	1.20884e-16
ENSG00000213639.5	PPP1CB	0.082102	-0.670034	-0.752803	1.25483e-16
ENSG00000166197.12	NOLC1	-0.0361821	-0.561311	-0.525378	1.30696e-16
ENSG00000118855.14	MFSD1	0.34076	-0.284903	-0.626199	1.31073e-16
ENSG00000172725.9	CORO1B	0.222692	-0.371969	-0.595091	1.31933e-16
ENSG00000163191.5	S100A11	0.17492	-0.402717	-0.578154	1.39336e-16
ENSG00000112118.13	MCM3	-0.27587	-0.737878	-0.46231	1.39336e-16
ENSG00000145907.10	G3BP1	-0.054722	-0.531831	-0.477581	1.42036e-16
ENSG00000197102.6	DYNC1H1	0.110394	-0.283318	-0.393603	1.44343e-16
ENSG00000006125.12	AP2B1	0.152875	-0.522298	-0.675713	1.54892e-16
ENSG00000112081.12	SRSF3	-0.0489096	-0.53927	-0.490661	2.00965e-16
ENSG00000130811.6	EIF3G	0.0748054	-0.393597	-0.468782	2.0839e-16
ENSG00000198862.9	LTN1	0.225677	-0.778584	-1.00624	2.16701e-16
ENSG00000168918.9	INPP5D	0.0680678	-0.36616	-0.434641	2.18284e-16
ENSG00000170027.5	YWHAG	-0.0415156	-0.51625	-0.475	2.20639e-16
ENSG00000091140.8	DLD	0.13332	-0.526321	-0.65998	2.21256e-16
ENSG00000197697.3	HIST1H2BE	-0.358325	-0.912315	-0.554902	2.64219e-16
ENSG00000135018.9	UBQLN1	-0.0864482	-0.89812	-0.813435	3.60534e-16
ENSG00000196787.2	HIST1H2AG	-0.297228	-0.769994	-0.473193	3.75142e-16
ENSG00000142230.7	SAE1	-0.100797	-0.722601	-0.622485	3.88057e-16
ENSG00000138182.10	KIF20B	-0.0138594	-0.890254	-0.878268	4.89823e-16
ENSG00000124783.8	SSR1	0.0362964	-0.617977	-0.65483	5.03384e-16
ENSG00000072958.4	AP1M1	0.0874765	-0.531156	-0.619235	5.79255e-16
ENSG00000014641.13	MDH1	0.098529	-0.375556	-0.474474	5.85671e-16
ENSG00000105339.6	DENND3	0.11651	-0.404198	-0.521218	5.94158e-16
ENSG00000196591.7	HDAC2	-0.00701153	-0.547828	-0.541382	6.11625e-16
ENSG00000129951.14	LPPR3	0.031111	-0.408778	-0.440037	6.4009e-16
ENSG00000147416.6	ATP6V1B2	0.0376308	-0.47117	-0.508887	7.01326e-16
ENSG00000092964.12	DPYSL2	0.23806	-0.0726816	-0.310836	7.01326e-16
ENSG00000132466.13	ANKRD17	0.0115597	-0.563681	-0.57598	8.17769e-16
ENSG00000127951.5	FGL2	0.497084	0.0462938	-0.450683	8.47189e-16
ENSG00000126267.4	COX6B1	0.0817345	-0.378172	-0.460279	9.36959e-16
ENSG00000138674.12	SEC31A	0.133891	-0.427593	-0.56194	9.40322e-16
ENSG00000117394.15	SLC2A1	0.0796738	-0.420274	-0.500335	9.40322e-16
ENSG00000121966.6	CXCR4	0.224144	-0.304199	-0.528624	9.48683e-16
ENSG00000179115.6	FARSA	-0.066563	-0.480442	-0.413906	1.06279e-15
ENSG00000136536.10	MARCH7	0.304895	-0.218772	-0.523691	1.11741e-15
ENSG00000164919.6	COX6C	0.0867883	-0.457682	-0.54463	1.25428e-15
ENSG00000084774.9	CAD	-0.0471843	-0.536323	-0.489294	1.46185e-15
ENSG00000102699.5	PARP4	0.155354	-0.457207	-0.612953	1.63961e-15
ENSG00000152795.13	HNRNPDL	-0.240832	-0.799302	-0.559234	2.11082e-15
ENSG00000099341.7	PSMD8	0.00540694	-0.476753	-0.482311	2.22869e-15
ENSG00000110090.8	CPT1A	0.123961	-0.406461	-0.530963	2.29387e-15
ENSG00000166598.8	HSP90B1	-0.180035	-0.492045	-0.312133	2.55239e-15
ENSG00000058262.5	SEC61A1	-0.0269352	-0.445626	-0.418957	2.62874e-15
ENSG00000117724.8	CENPF	-0.193396	-0.657608	-0.464579	2.703e-15
ENSG00000084623.7	EIF3I	0.000397286	-0.440909	-0.441432	2.8318e-15
ENSG00000113013.8	HSPA9	-0.0811332	-0.437818	-0.356679	2.8318e-15
ENSG00000150753.7	CCT5	-0.123865	-0.510727	-0.38717	2.84631e-15
ENSG00000085872.10	CHERP	-0.0330537	-0.628504	-0.596257	3.44081e-15
ENSG00000104897.5	SF3A2	-0.138985	-0.676786	-0.538495	3.7466e-15
ENSG00000128340.10	RAC2	0.19834	-0.189245	-0.387833	3.75664e-15
ENSG00000136156.8	ITM2B	0.160392	-0.416867	-0.57784	4.99687e-15
ENSG00000113441.11	LNPEP	0.123947	-0.500898	-0.625545	5.01446e-15
ENSG00000158710.10	TAGLN2	0.0226683	-0.385143	-0.407812	5.45516e-15
ENSG00000184840.7	TMED9	-0.236825	-0.766557	-0.530492	5.75055e-15
ENSG00000070081.11	NUCB2	-0.235675	-0.740112	-0.504879	6.03101e-15
ENSG00000102265.7	TIMP1	0.173314	-0.389592	-0.563329	6.41633e-15
ENSG00000154473.13	BUB3	-0.0265686	-0.465123	-0.438851	7.1252e-15
ENSG00000173473.6	SMARCC1	-0.0343805	-0.563605	-0.529778	7.17912e-15
ENSG00000139641.8	ESYT1	-0.0666125	-0.523972	-0.457737	7.20661e-15
ENSG00000070214.11	SLC44A1	0.102137	-0.277817	-0.380174	7.27916e-15
ENSG00000182568.12	SATB1	0.050059	-0.432046	-0.48234	7.4719e-15
ENSG00000153310.14	FAM49B	0.0950266	-0.572106	-0.668058	7.57374e-15
ENSG00000108518.7	PFN1	0.0519049	-0.20761	-0.259429	8.44019e-15
ENSG00000100714.11	MTHFD1	-0.164124	-0.645427	-0.481833	8.80619e-15
ENSG00000147677.6	EIF3H	-0.0414295	-0.430463	-0.3892	9.51951e-15
ENSG00000185591.5	SP1	-0.0680196	-0.76517	-0.698194	9.57577e-15
ENSG00000146731.6	CCT6A	-0.12228	-0.604668	-0.482916	9.74463e-15
ENSG00000071626.12	DAZAP1	-0.216629	-0.823535	-0.607797	9.8716e-15
ENSG00000156966.6	B3GNT7	0.439952	-0.102098	-0.542067	1.09815e-14
ENSG00000071127.12	WDR1	0.152863	-0.229156	-0.382179	1.14852e-14
ENSG00000114867.15	EIF4G1	-0.293206	-0.634474	-0.341537	1.14852e-14
ENSG00000087087.14	SRRT	0.0701448	-0.431566	-0.501985	1.1625e-14
ENSG00000138160.4	KIF11	-0.199267	-0.93829	-0.740291	1.29756e-14
ENSG00000012061.11	ERCC1	0.168649	-0.550508	-0.719685	1.31194e-14
ENSG00000115875.14	SRSF7	-0.0922593	-0.518186	-0.42609	1.40375e-14
ENSG00000105701.11	FKBP8	0.0627786	-0.513363	-0.57668	1.48253e-14
ENSG00000108828.11	VAT1	0.0289032	-0.713529	-0.743309	1.49658e-14
ENSG00000198518.5	HIST1H4E	-0.273646	-0.565008	-0.291363	1.50544e-14
ENSG00000197043.9	ANXA6	0.159578	-0.273584	-0.433244	1.54942e-14
ENSG00000116649.5	SRM	0.0296894	-0.867443	-0.899115	1.57147e-14
ENSG00000135940.2	COX5B	0.141096	-0.331598	-0.472699	2.15286e-14
ENSG00000168439.12	STIP1	-0.192616	-0.660794	-0.468732	2.20181e-14
ENSG00000197451.6	HNRNPAB	-0.101508	-0.577339	-0.476047	2.33327e-14
ENSG00000196235.9	SUPT5H	0.0857814	-0.404636	-0.490471	2.35548e-14
ENSG00000184743.8	ATL3	0.0841631	-0.557217	-0.642032	2.53514e-14
ENSG00000108953.12	YWHAE	-0.257244	-0.829792	-0.573392	2.53514e-14
ENSG00000087460.19	GNAS	0.0557673	-0.36257	-0.418755	2.53514e-14
ENSG00000119314.11	PTBP3	0.218026	-0.331843	-0.550061	2.61203e-14
ENSG00000039123.11	SKIV2L2	0.0855916	-0.473345	-0.559285	2.70662e-14
ENSG00000077312.4	SNRPA	-0.0745401	-0.632648	-0.558646	3.13464e-14
ENSG00000067064.6	IDI1	0.0250185	-0.544548	-0.57026	3.36151e-14
ENSG00000001497.12	LAS1L	-0.168335	-0.896377	-0.729255	3.50481e-14
ENSG00000168274.3	HIST1H2AE	-0.327976	-0.638267	-0.310339	3.55791e-14
ENSG00000131504.11	DIAPH1	-0.0658552	-0.509674	-0.443994	3.70003e-14
ENSG00000140632.12	GLYR1	0.0866598	-0.600773	-0.687949	3.94582e-14
ENSG00000186818.8	LILRB4	0.372044	-0.229639	-0.601895	4.17054e-14
ENSG00000126261.8	UBA2	-0.0377291	-0.664651	-0.627465	4.76251e-14
ENSG00000104635.9	SLC39A14	-0.15294	-0.949535	-0.798	5.2663e-14
ENSG00000132383.7	RPA1	-0.124745	-0.699133	-0.574777	5.34703e-14
ENSG00000100567.8	PSMA3	0.0411822	-0.489857	-0.531558	5.66366e-14
ENSG00000197771.8	MCMBP	-0.00129785	-0.485013	-0.484018	5.68282e-14
ENSG00000170312.11	CDK1	-0.218738	-0.97214	-0.755027	5.78258e-14
ENSG00000081189.9	MEF2C	0.0906018	-0.538669	-0.629978	6.04713e-14
ENSG00000158373.7	HIST1H2BD	-0.162029	-0.520784	-0.35881	6.15208e-14
ENSG00000168961.12	LGALS9	0.248614	-0.480735	-0.730207	6.54077e-14
ENSG00000215301.5	DDX3X	-0.0188874	-0.482032	-0.463324	6.73769e-14
ENSG00000105676.9	ARMC6	0.0132669	-0.706269	-0.720341	7.03521e-14
ENSG00000117523.11	PRRC2C	-0.0123193	-0.424822	-0.41257	7.06923e-14
ENSG00000153827.9	TRIP12	0.0676419	-0.439204	-0.50716	8.3752e-14
ENSG00000162521.14	RBBP4	0.0203304	-0.615261	-0.636322	8.43643e-14
ENSG00000089639.6	GMIP	0.221234	-0.459967	-0.681891	9.04411e-14
ENSG00000064601.12	CTSA	0.178987	-0.379367	-0.558706	9.4743e-14
ENSG00000105223.14	PLD3	0.505807	-0.0786096	-0.584285	9.56097e-14
ENSG00000111786.4	SRSF9	-0.0188715	-0.694234	-0.676256	9.95566e-14
ENSG00000181222.10	POLR2A	0.119285	-0.214835	-0.33407	1.06512e-13
ENSG00000105364.9	MRPL4	-0.0234107	-0.611929	-0.589024	1.1488e-13
ENSG00000141510.11	TP53	0.185038	-0.293359	-0.478433	1.19346e-13
ENSG00000077147.10	TM9SF3	0.0272958	-0.663308	-0.691353	1.36406e-13
ENSG00000023318.7	ERP44	0.0284991	-0.583364	-0.612315	1.49467e-13
ENSG00000130479.6	MAP1S	0.138444	-0.470004	-0.608786	1.49467e-13
ENSG00000160410.10	SHKBP1	0.120826	-0.446634	-0.567961	1.61754e-13
ENSG00000139687.9	RB1	0.0253334	-0.736965	-0.763841	1.72398e-13
ENSG00000198805.7	PNP	0.12414	-0.328135	-0.452277	1.72496e-13
ENSG00000134802.13	SLC43A3	0.00216093	-0.504419	-0.507134	1.72639e-13
ENSG00000072310.12	SREBF1	-0.049775	-0.549719	-0.500355	1.72639e-13
ENSG00000077097.9	TOP2B	0.102179	-0.357042	-0.459445	1.73239e-13
ENSG00000136286.10	MYO1G	0.345263	0.00130875	-0.344012	1.766e-13
ENSG00000134910.8	STT3A	-0.108201	-0.458195	-0.350385	1.78717e-13
ENSG00000070756.9	PABPC1	0.00251514	-0.4209	-0.423547	1.79667e-13
ENSG00000066135.8	KDM4A	0.191563	-0.685891	-0.878689	1.82097e-13
ENSG00000196504.11	PRPF40A	0.109157	-0.392317	-0.50157	1.97173e-13
ENSG00000008018.8	PSMB1	-0.0156775	-0.437039	-0.421398	2.26159e-13
ENSG00000180353.6	HCLS1	0.188529	-0.21386	-0.402289	2.47074e-13
ENSG00000125107.12	CNOT1	-0.00474087	-0.451917	-0.447225	2.54909e-13
ENSG00000131828.9	PDHA1	0.000191192	-0.60738	-0.608482	2.82185e-13
ENSG00000047410.9	TPR	0.0686652	-0.365817	-0.434519	2.94439e-13
ENSG00000148180.12	GSN	0.558821	0.218204	-0.34041	2.98821e-13
ENSG00000125869.5	LAMP5	0.253114	-0.207488	-0.460831	3.49505e-13
ENSG00000123131.8	PRDX4	-0.0344123	-0.979632	-0.947277	3.73593e-13
ENSG00000176619.6	LMNB2	-0.181227	-0.697759	-0.517333	3.82655e-13
ENSG00000197459.2	HIST1H2BH	-0.322056	-0.697891	-0.376373	3.84844e-13
ENSG00000139921.8	TMX1	0.0698488	-0.676162	-0.747	3.97961e-13
ENSG00000136279.14	DBNL	0.187779	-0.347122	-0.535144	4.28235e-13
ENSG00000005022.5	SLC25A5	-0.084981	-0.510403	-0.425581	4.29627e-13
ENSG00000120437.7	ACAT2	-0.054847	-0.58383	-0.529364	4.69328e-13
ENSG00000132646.6	PCNA	-0.0143203	-0.347923	-0.333707	4.86126e-13
ENSG00000198374.3	HIST1H2AL	-0.422949	-0.916918	-0.494506	5.03519e-13
ENSG00000101158.8	NELFCD	-0.0616384	-0.889172	-0.829332	5.49591e-13
ENSG00000100632.6	ERH	-0.0440135	-0.515165	-0.471664	5.78667e-13
ENSG00000128245.10	YWHAH	-0.152681	-1.05733	-0.906754	5.92582e-13
ENSG00000116120.8	FARSB	0.0587289	-0.60281	-0.662593	6.20506e-13
ENSG00000089737.11	DDX24	-0.00800799	-0.463132	-0.455512	7.37079e-13
ENSG00000136450.8	SRSF1	-0.169015	-0.592496	-0.424016	7.4427e-13
ENSG00000115232.9	ITGA4	0.175681	-0.46605	-0.642305	7.50636e-13
ENSG00000033178.8	UBA6	0.0480905	-0.925232	-0.97559	7.64173e-13
ENSG00000142347.12	MYO1F	0.236826	-0.18302	-0.420203	7.76432e-13
ENSG00000135624.11	CCT7	-1.13306	-1.51202	-0.379634	7.85343e-13
ENSG00000115091.7	ACTR3	0.05759	-0.328986	-0.386687	8.34614e-13
ENSG00000175567.4	UCP2	0.199409	-1.13191	-1.33644	8.53434e-13
ENSG00000152253.4	SPC25	1.27953	-0.321927	-1.63101	8.57176e-13
ENSG00000158417.6	EIF5B	-0.0475492	-0.626382	-0.579699	9.03226e-13
ENSG00000171490.8	RSL1D1	-0.0430123	-0.556829	-0.514501	9.35279e-13
ENSG00000255302.3	EID1	0.219388	-0.307036	-0.526884	9.93391e-13
ENSG00000110696.5	C11orf58	-0.00452867	-0.901819	-0.899591	1.00259e-12
ENSG00000127616.13	SMARCA4	0.065843	-0.301656	-0.36772	1.01412e-12
ENSG00000170248.9	PDCD6IP	0.106645	-0.409684	-0.516799	1.04047e-12
ENSG00000100401.15	RANGAP1	-0.145253	-0.695402	-0.550606	1.11837e-12
ENSG00000112992.12	NNT	0.101431	-0.383536	-0.485154	1.24384e-12
ENSG00000132600.12	PRMT7	0.406388	-0.188719	-0.595379	1.39246e-12
ENSG00000159352.11	PSMD4	0.00367997	-0.746881	-0.75208	1.48639e-12
ENSG00000167645.12	YIF1B	0.15639	-0.488747	-0.645685	1.54793e-12
ENSG00000115866.6	DARS	-0.0736678	-0.62829	-0.555518	1.60729e-12
ENSG00000134057.10	CCNB1	-0.302986	-0.789609	-0.487347	1.67373e-12
ENSG00000134061.4	CD180	0.233289	-0.317084	-0.550652	1.70735e-12
ENSG00000151883.12	PARP8	0.168439	-0.352847	-0.521399	1.74422e-12
ENSG00000079805.12	DNM2	0.0713839	-0.375792	-0.447568	1.76981e-12
ENSG00000177885.9	GRB2	0.177673	-0.383472	-0.561732	1.8229e-12
ENSG00000105401.2	CDC37	0.0285975	-0.404105	-0.432738	1.8229e-12
ENSG00000165934.8	CPSF2	-0.0496292	-0.758637	-0.710204	1.8689e-12
ENSG00000143621.12	ILF2	-0.111018	-0.519045	-0.408312	2.05828e-12
ENSG00000107438.4	PDLIM1	0.184764	-0.411352	-0.596606	2.10016e-12
ENSG00000184992.10	BRI3BP	0.0561616	-0.805678	-0.863421	2.18543e-12
ENSG00000132382.10	MYBBP1A	0.0183248	-0.499571	-0.518495	2.23158e-12
ENSG00000101558.9	VAPA	0.0614159	-0.784987	-0.84823	2.27393e-12
ENSG00000165732.8	DDX21	-0.204884	-0.609395	-0.404777	2.43691e-12
ENSG00000116489.8	CAPZA1	0.0572415	-0.414258	-0.471697	2.48405e-12
ENSG00000107819.9	SFXN3	0.259554	-0.442782	-0.702973	2.48716e-12
ENSG00000143669.9	LYST	0.202483	-0.262539	-0.465475	2.57886e-12
ENSG00000160789.15	LMNA	0.267561	-0.0628449	-0.330443	2.64735e-12
ENSG00000141543.5	EIF4A3	0.00894105	-0.392421	-0.401739	2.75076e-12
ENSG00000053371.8	AKR7A2	0.152628	-0.445488	-0.598425	2.94267e-12
ENSG00000167513.4	CDT1	-0.448713	-1.03291	-0.585313	3.01377e-12
ENSG00000131473.12	ACLY	0.158754	-0.359697	-0.51877	3.234e-12
ENSG00000090863.7	GLG1	0.205921	-0.306207	-0.512672	3.69784e-12
ENSG00000120694.15	HSPH1	-0.341645	-0.810282	-0.469483	3.83843e-12
ENSG00000147684.3	NDUFB9	0.108973	-0.374124	-0.483451	3.97593e-12
ENSG00000155561.10	NUP205	-0.135109	-0.631447	-0.496846	4.06718e-12
ENSG00000169136.4	ATF5	-0.121615	-1.34395	-1.22801	4.10856e-12
ENSG00000109805.5	NCAPG	-0.207144	-1.03342	-0.828113	4.18019e-12
ENSG00000101182.10	PSMA7	-0.000883069	-0.507245	-0.506636	4.37597e-12
ENSG00000156482.6	RPL30	0.15038	-0.203312	-0.353857	4.47534e-12
ENSG00000100280.12	AP1B1	0.0420799	-0.533873	-0.576611	4.47654e-12
ENSG00000078674.13	PCM1	0.0267693	-0.389042	-0.415852	4.54564e-12
ENSG00000026508.12	CD44	0.193075	-0.137503	-0.330765	4.95151e-12
ENSG00000060138.8	YBX3	0.182292	-0.417697	-0.600659	5.0513e-12
ENSG00000013275.3	PSMC4	0.00645808	-0.493506	-0.500357	5.98165e-12
ENSG00000116754.9	SRSF11	0.0876476	-0.594743	-0.683312	6.30076e-12
ENSG00000149923.9	PPP4C	0.00323416	-0.654503	-0.658542	6.35111e-12
ENSG00000164941.9	INTS8	0.0368155	-0.81867	-0.857119	6.59943e-12
ENSG00000167815.7	PRDX2	0.132732	-0.307401	-0.440215	6.74931e-12
ENSG00000168028.9	RPSA	0.139277	-0.832055	-0.973487	7.2169e-12
ENSG00000163527.5	STT3B	-0.0366578	-0.546239	-0.510238	7.2169e-12
ENSG00000184640.13	SEPT9	0.195641	-0.451563	-0.6479	7.26473e-12
ENSG00000211450.5	C11orf31	0.112651	-0.489102	-0.602249	7.35784e-12
ENSG00000179271.1	GADD45GIP1	0.0847907	-0.477003	-0.562407	7.57054e-12
ENSG00000134516.11	DOCK2	0.188436	-0.195083	-0.383679	7.64351e-12
ENSG00000112759.12	SLC29A1	-0.27112	-1	-0.730655	7.70276e-12
ENSG00000213741.4	RPS29	-0.600373	-0.0635027	0.531048	7.8388e-12
ENSG00000135535.10	CD164	0.0944348	-0.604458	-0.700001	8.29844e-12
ENSG00000149532.11	CPSF7	-0.0103011	-0.810338	-0.801444	8.34573e-12
ENSG00000130309.6	COLGALT1	-0.174995	-0.571249	-0.396742	8.59686e-12
ENSG00000197409.6	HIST1H3D	-0.43386	-0.709231	-0.275477	8.6933e-12
ENSG00000120899.13	PTK2B	0.192809	-0.20501	-0.397751	8.70441e-12
ENSG00000120280.5	CXorf21	-0.041848	-0.565257	-0.524224	9.3368e-12
ENSG00000100427.11	MLC1	0.226665	-0.17638	-0.403016	9.42631e-12
ENSG00000166913.8	YWHAB	-0.00702917	-0.453198	-0.446631	9.98441e-12
ENSG00000100242.11	SUN2	0.190304	-0.206161	-0.396715	9.98441e-12
ENSG00000069849.6	ATP1B3	-0.0174421	-0.760661	-0.744398	1.08175e-11
ENSG00000029363.11	BCLAF1	0.103705	-0.416033	-0.519976	1.09317e-11
ENSG00000011426.6	ANLN	-0.189418	-0.838133	-0.650095	1.19205e-11
ENSG00000122025.10	FLT3	-0.015433	-0.42541	-0.410329	1.19205e-11
ENSG00000145506.9	NKD2	0.363312	-0.609048	-0.973918	1.26206e-11
ENSG00000175166.12	PSMD2	-0.110686	-0.635588	-0.525599	1.26206e-11
ENSG00000135821.12	GLUL	-0.0293045	-0.396243	-0.367219	1.26206e-11
ENSG00000108424.5	KPNB1	-0.2529	-0.60111	-0.348428	1.26206e-11
ENSG00000128951.9	DUT	-0.263249	-0.668835	-0.406076	1.31266e-11
ENSG00000003056.3	M6PR	0.0462291	-0.59136	-0.638237	1.31588e-11
ENSG00000148834.8	GSTO1	0.151791	-0.378511	-0.530409	1.33036e-11
ENSG00000156136.5	DCK	0.0796127	-1.11346	-1.19815	1.36037e-11
ENSG00000169738.3	DCXR	0.0951602	-0.475841	-0.571642	1.45858e-11
ENSG00000119969.10	HELLS	-0.188841	-0.962385	-0.775775	1.50438e-11
ENSG00000105379.5	ETFB	0.224946	-0.451284	-0.677037	1.50746e-11
ENSG00000177663.9	IL17RA	-0.0360056	-0.47949	-0.443871	1.50751e-11
ENSG00000133226.12	SRRM1	-0.000386447	-0.537756	-0.538219	1.56743e-11
ENSG00000104884.10	ERCC2	0.320916	-0.281606	-0.602945	1.65625e-11
ENSG00000106105.9	GARS	-0.337815	-0.817034	-0.480034	1.66126e-11
ENSG00000132305.16	IMMT	0.0206234	-0.483816	-0.504808	1.67055e-11
ENSG00000109736.10	MFSD10	-0.00750196	-0.518914	-0.512071	1.74512e-11
ENSG00000089248.6	ERP29	0.0472242	-0.376236	-0.423551	1.80028e-11
ENSG00000126787.8	DLGAP5	-0.194198	-1.01178	-0.819734	1.87126e-11
ENSG00000156802.8	ATAD2	-0.258388	-0.708637	-0.451032	1.88973e-11
ENSG00000136810.8	TXN	-0.108943	-0.642739	-0.534618	2.039e-11
ENSG00000196961.8	AP2A1	0.107109	-0.32577	-0.432871	2.09134e-11
ENSG00000112306.7	RPS12	0.218898	-0.850252	-1.07242	2.10018e-11
ENSG00000031823.10	RANBP3	-0.0723834	-0.795641	-0.724938	2.12517e-11
ENSG00000157227.8	MMP14	-0.0951934	-0.527838	-0.433196	2.12517e-11
ENSG00000141959.12	PFKL	-0.000100921	-0.380167	-0.380184	2.18015e-11
ENSG00000082153.13	BZW1	-0.122789	-0.726239	-0.604608	2.23638e-11
ENSG00000095002.8	MSH2	-0.238626	-0.910411	-0.673133	2.25652e-11
ENSG00000185721.7	DRG1	0.0521513	-0.774787	-0.828929	2.29278e-11
ENSG00000125844.11	RRBP1	0.0150693	-0.454031	-0.469524	2.36847e-11
ENSG00000118246.9	FASTKD2	0.126005	-0.767826	-0.896039	2.45089e-11
ENSG00000171940.9	ZNF217	0.055934	-0.498508	-0.554944	2.49564e-11
ENSG00000163466.11	ARPC2	0.0600246	-0.377367	-0.437754	2.62724e-11
ENSG00000115310.13	RTN4	-0.113437	-0.804984	-0.692717	2.72422e-11
ENSG00000173692.8	PSMD1	-0.118099	-0.632543	-0.515101	2.94049e-11
ENSG00000090376.4	IRAK3	0.17182	-0.745682	-0.919176	3.05433e-11
ENSG00000177731.11	FLII	0.0939581	-0.337961	-0.432285	3.20673e-11
ENSG00000004478.5	FKBP4	-0.257554	-0.806616	-0.549665	3.40297e-11
ENSG00000138777.15	PPA2	0.206147	-0.362032	-0.568799	3.46919e-11
ENSG00000117399.9	CDC20	-0.266377	-0.822001	-0.556729	3.46919e-11
ENSG00000204316.8	MRPL38	0.315356	-0.709607	-1.02521	3.75734e-11
ENSG00000108344.10	PSMD3	-0.0549295	-0.565257	-0.510858	3.83433e-11
ENSG00000051108.10	HERPUD1	-0.110819	-0.81461	-0.705082	4.16119e-11
ENSG00000067704.8	IARS2	-0.05565	-0.666262	-0.61134	4.27411e-11
ENSG00000241837.2	ATP5O	0.12509	-0.442887	-0.568779	4.38512e-11
ENSG00000113368.7	LMNB1	-0.383063	-0.651011	-0.268104	4.6181e-11
ENSG00000143889.11	HNRNPLL	0.0955666	-0.752072	-0.849199	4.71209e-11
ENSG00000148175.8	STOM	0.123116	-0.602036	-0.726521	4.84675e-11
ENSG00000171608.11	PIK3CD	0.0847167	-0.438531	-0.52373	4.84675e-11
ENSG00000137154.8	RPS6	-0.518641	-0.839212	-0.321025	4.95912e-11
ENSG00000178252.13	WDR6	-0.0416935	-0.609504	-0.568729	5.17555e-11
ENSG00000066279.12	ASPM	-0.184346	-0.750021	-0.566682	5.26297e-11
ENSG00000174780.11	SRP72	-0.00613548	-0.641903	-0.636736	5.30601e-11
ENSG00000134824.9	FADS2	-0.147186	-0.454449	-0.307426	5.33523e-11
ENSG00000164134.8	NAA15	0.0494709	-0.545325	-0.595343	5.38242e-11
ENSG00000066422.4	ZBTB11	0.219271	-0.759736	-0.981334	5.82105e-11
ENSG00000164062.8	APEH	0.0685852	-0.374567	-0.443615	6.073e-11
ENSG00000126457.16	PRMT1	-0.0293885	-0.332167	-0.303067	6.08586e-11
ENSG00000090621.9	PABPC4	-0.000765835	-0.641369	-0.641598	6.15568e-11
ENSG00000104960.11	PTOV1	0.0311583	-0.508287	-0.54015	6.26196e-11
ENSG00000120690.9	ELF1	-0.0268704	-0.386904	-0.360279	6.30858e-11
ENSG00000169045.13	HNRNPH1	-0.0552223	-0.329471	-0.274434	6.49436e-11
ENSG00000196176.7	HIST1H4A	-0.376771	-0.696295	-0.320014	6.61875e-11
ENSG00000105726.12	ATP13A1	0.0787406	-0.334602	-0.413507	6.68298e-11
ENSG00000161638.6	ITGA5	-0.0174291	-0.449054	-0.431757	7.15846e-11
ENSG00000182572.2	HIST1H3I	-0.310486	-0.590319	-0.279882	7.17837e-11
ENSG00000198931.6	APRT	0.0952152	-0.369234	-0.464897	7.24682e-11
ENSG00000100991.7	TRPC4AP	0.105572	-0.551242	-0.657759	7.44807e-11
ENSG00000143761.9	ARF1	-0.0177991	-0.44532	-0.427885	8.1075e-11
ENSG00000124795.10	DEK	-0.26408	-1.074	-0.811918	8.45049e-11
ENSG00000170315.9	UBB	-0.00530618	-0.438401	-0.433393	8.60862e-11
ENSG00000129534.9	MIS18BP1	0.0245411	-0.557102	-0.582702	8.68423e-11
ENSG00000164163.6	ABCE1	0.0691404	-0.648688	-0.718973	8.72689e-11
ENSG00000187990.4	HIST1H2BG	-0.321554	-0.608379	-0.286924	9.06246e-11
ENSG00000115760.9	BIRC6	0.0724322	-0.404545	-0.477092	9.1448e-11
ENSG00000179051.9	RCC2	-0.0615482	-0.517399	-0.456083	9.51949e-11
ENSG00000140575.8	IQGAP1	0.0987769	-0.282056	-0.38107	9.91915e-11
ENSG00000110108.5	TMEM109	0.0387747	-0.510615	-0.55	1.05211e-10
ENSG00000096063.10	SRPK1	-0.127581	-0.959736	-0.834867	1.07331e-10
ENSG00000054118.9	THRAP3	0.0301769	-0.35855	-0.388884	1.07331e-10
ENSG00000159228.8	CBR1	0.0525834	-1.31411	-1.37423	1.09251e-10
ENSG00000170606.9	HSPA4	-0.0523901	-0.509106	-0.457173	1.11969e-10
ENSG00000134108.8	ARL8B	0.0156621	-1.02076	-1.03987	1.14519e-10
ENSG00000136518.12	ACTL6A	-0.187177	-0.754887	-0.56878	1.14851e-10
ENSG00000102054.13	RBBP7	-0.235774	-0.752072	-0.516929	1.24135e-10
ENSG00000112294.8	ALDH5A1	-0.0810761	-1.34792	-1.27318	1.2436e-10
ENSG00000137193.9	PIM1	-0.0918935	-0.561157	-0.469968	1.28297e-10
ENSG00000104517.8	UBR5	0.0885438	-0.393719	-0.482487	1.29766e-10
ENSG00000154518.5	ATP5G3	-0.0449145	-0.386698	-0.342031	1.36098e-10
ENSG00000197846.3	HIST1H2BF	-0.271918	-0.594862	-0.323423	1.37195e-10
ENSG00000168264.6	IRF2BP2	0.047973	-0.314108	-0.362266	1.47703e-10
ENSG00000133265.6	HSPBP1	-0.191727	-0.967085	-0.77744	1.52054e-10
ENSG00000143401.10	ANP32E	-0.0909506	-0.857981	-0.768382	1.56493e-10
ENSG00000066336.7	SPI1	0.0411618	-0.416762	-0.458294	1.667e-10
ENSG00000109111.10	SUPT6H	0.10292	-0.435067	-0.538346	1.68322e-10
ENSG00000168003.12	SLC3A2	-0.328022	-0.699898	-0.372084	1.73761e-10
ENSG00000169727.8	GPS1	0.128222	-0.429834	-0.558326	1.73856e-10
ENSG00000175073.7	VCPIP1	0.214835	-0.406854	-0.622501	1.91386e-10
ENSG00000100347.10	SAMM50	0.0491199	-0.560088	-0.609996	1.91608e-10
ENSG00000137812.15	CASC5	-0.368531	-1.18442	-0.818406	1.96853e-10
ENSG00000107738.15	C10orf54	0.36519	-0.449803	-0.815967	2.08208e-10
ENSG00000144746.6	ARL6IP5	0.331132	-0.305502	-0.637181	2.12212e-10
ENSG00000115234.6	SNX17	0.063885	-0.481674	-0.546292	2.1359e-10
ENSG00000159618.11	GPR114	0.194924	-0.421216	-0.616703	2.13654e-10
ENSG00000171848.9	RRM2	-0.490849	-0.959115	-0.468923	2.14558e-10
ENSG00000176890.11	TYMS	-0.185374	-0.616532	-0.431466	2.28801e-10
ENSG00000181789.10	COPG1	0.0419699	-0.32066	-0.362765	2.28829e-10
ENSG00000147162.9	OGT	0.200782	-0.410345	-0.6117	2.36078e-10
ENSG00000143799.8	PARP1	-0.0365164	-0.41748	-0.381081	2.44826e-10
ENSG00000117713.13	ARID1A	0.0152112	-0.417377	-0.432778	2.48083e-10
ENSG00000197081.8	IGF2R	0.192868	-0.172206	-0.365041	2.48083e-10
ENSG00000134255.9	CEPT1	0.202881	-0.600392	-0.804598	2.50131e-10
ENSG00000090273.9	NUDC	-0.172539	-0.767507	-0.595959	2.55006e-10
ENSG00000075292.14	ZNF638	0.0852439	-0.577227	-0.663232	2.56006e-10
ENSG00000086758.11	HUWE1	0.0753891	-0.307757	-0.383168	2.58845e-10
ENSG00000148773.8	MKI67	-0.395342	-0.721254	-0.32658	2.60867e-10
ENSG00000197448.9	GSTK1	0.180639	-0.356431	-0.537617	2.62928e-10
ENSG00000155304.4	HSPA13	-0.256771	-1.07464	-0.820225	2.64078e-10
ENSG00000176393.6	RNPEP	0.00216201	-0.4843	-0.486823	2.68377e-10
ENSG00000184825.4	HIST1H2AH	-0.334955	-0.689791	-0.355204	2.68377e-10
ENSG00000117450.9	PRDX1	0.0169966	-0.342887	-0.360196	2.7709e-10
ENSG00000167325.10	RRM1	-0.385878	-0.794337	-0.40876	2.96912e-10
ENSG00000131051.16	RBM39	-0.0990157	-0.633758	-0.535263	3.06194e-10
ENSG00000184634.11	MED12	0.207943	-0.356303	-0.564953	3.07132e-10
ENSG00000020922.8	MRE11A	-0.144312	-1.13171	-0.991562	3.18359e-10
ENSG00000089220.4	PEBP1	0.0252178	-0.440966	-0.466642	3.18562e-10
ENSG00000121807.5	CCR2	0.262068	-0.239131	-0.501185	3.20762e-10
ENSG00000175756.9	AURKAIP1	-0.013716	-0.784987	-0.772586	3.23885e-10
ENSG00000110344.5	UBE4A	0.0523493	-0.650415	-0.703954	3.23885e-10
ENSG00000141380.9	SS18	0.08187	-0.88296	-0.967791	3.29045e-10
ENSG00000112972.10	HMGCS1	-0.0783989	-0.444946	-0.366568	3.42081e-10
ENSG00000088930.6	XRN2	0.0241892	-0.441904	-0.466304	3.46354e-10
ENSG00000008282.3	SYPL1	0.0486498	-0.501252	-0.550321	3.48229e-10
ENSG00000122952.12	ZWINT	-0.291805	-0.995016	-0.704888	3.48448e-10
ENSG00000077549.13	CAPZB	0.141402	-0.256833	-0.398399	3.50631e-10
ENSG00000110717.6	NDUFS8	-0.0141296	-0.590839	-0.57758	3.56158e-10
ENSG00000180104.11	EXOC3	0.317227	-0.15952	-0.476894	3.95949e-10
ENSG00000132386.6	SERPINF1	0.585283	-0.0824619	-0.668175	4.09185e-10
ENSG00000155380.7	SLC16A1	-0.114069	-0.684628	-0.57144	4.19667e-10
ENSG00000074319.8	TSG101	0.0412592	-0.7856	-0.828528	4.37961e-10
ENSG00000108582.7	CPD	0.116092	-0.426502	-0.543229	4.38016e-10
ENSG00000125753.9	VASP	0.0227971	-0.385832	-0.408745	4.38472e-10
ENSG00000071794.11	HLTF	0.26483	-0.584962	-0.850979	4.5003e-10
ENSG00000115956.9	PLEK	0.0138164	-0.349026	-0.363239	4.5624e-10
ENSG00000077348.4	EXOSC5	0.106401	-0.453126	-0.560252	4.685e-10
ENSG00000011028.9	MRC2	0.261362	-0.112475	-0.37372	4.685e-10
ENSG00000135363.7	LMO2	0.123496	-0.63743	-0.761932	5.06241e-10
ENSG00000101310.10	SEC23B	-0.0168905	-0.542318	-0.526073	5.08648e-10
ENSG00000140497.12	SCAMP2	0.108078	-0.478511	-0.587343	5.17509e-10
ENSG00000167900.7	TK1	-0.279517	-0.810382	-0.531862	5.26013e-10
ENSG00000002834.13	LASP1	0.146726	-0.440895	-0.588043	5.63531e-10
ENSG00000103249.13	CLCN7	0.251992	-0.355331	-0.607758	5.64142e-10
ENSG00000178741.7	COX5A	0.0444752	-0.4447	-0.489683	5.85805e-10
ENSG00000132842.9	AP3B1	0.125402	-0.450945	-0.576929	6.00079e-10
ENSG00000163349.17	HIPK1	-0.0123561	-0.971985	-0.962773	6.02124e-10
ENSG00000103342.8	GSPT1	-0.102612	-0.551192	-0.448864	6.04944e-10
ENSG00000107862.4	GBF1	0.00105091	-0.623309	-0.625402	6.22473e-10
ENSG00000109062.5	SLC9A3R1	0.0903636	-0.484595	-0.575446	6.58043e-10
ENSG00000117448.9	AKR1A1	0.0985688	-0.693022	-0.793263	6.75457e-10
ENSG00000101608.8	MYL12A	0.193937	-0.213203	-0.407121	6.75457e-10
ENSG00000092820.13	EZR	-0.248096	-0.783406	-0.536012	6.90471e-10
ENSG00000180370.6	PAK2	0.0882601	-0.412823	-0.501749	7.07265e-10
ENSG00000176986.10	SEC24C	0.0022863	-0.47899	-0.48182	7.09378e-10
ENSG00000145495.10	MARCH6	0.087105	-0.62975	-0.717931	7.33046e-10
ENSG00000134627.7	PIWIL4	0.18264	-0.623436	-0.807905	7.67879e-10
ENSG00000175792.7	RUVBL1	-0.0707268	-0.620633	-0.550421	7.72707e-10
ENSG00000135956.4	TMEM127	0.06997	-1.42884	-1.50942	7.73736e-10
ENSG00000115364.9	MRPL19	0.0458631	-0.936806	-0.986386	7.73736e-10
ENSG00000135404.7	CD63	0.216242	-0.320956	-0.537716	7.73736e-10
ENSG00000087365.10	SF3B2	-0.0607782	-0.455452	-0.395118	7.8309e-10
ENSG00000174953.9	DHX36	0.0621339	-0.965784	-1.03142	7.95785e-10
ENSG00000127884.4	ECHS1	0.2897	-0.184276	-0.474392	8.30842e-10
ENSG00000115902.6	SLC1A4	0.0393967	-0.383118	-0.422938	8.33335e-10
ENSG00000108671.5	PSMD11	-0.209035	-0.883402	-0.675818	8.57502e-10
ENSG00000134759.9	ELP2	0.131445	-0.497801	-0.630129	8.9448e-10
ENSG00000182199.6	SHMT2	-0.219176	-0.594394	-0.375667	9.06447e-10
ENSG00000198218.6	QRICH1	-0.00819208	-0.663404	-0.656109	9.62355e-10
ENSG00000104805.11	NUCB1	0.0789367	-0.32925	-0.408208	9.72972e-10
ENSG00000185896.9	LAMP1	0.119551	-0.254746	-0.374672	1.02455e-09
ENSG00000120265.12	PCMT1	-0.022698	-0.722187	-0.70079	1.08642e-09
ENSG00000104774.8	MAN2B1	0.313508	-0.00813685	-0.321576	1.11182e-09
ENSG00000065427.10	KARS	0.0164678	-0.392894	-0.409799	1.13236e-09
ENSG00000149182.10	ARFGAP2	0.124874	-0.432557	-0.557919	1.20445e-09
ENSG00000070814.13	TCOF1	-0.16632	-0.800391	-0.635106	1.22007e-09
ENSG00000143179.8	UCK2	0.000905945	-0.708234	-0.710436	1.26116e-09
ENSG00000079785.10	DDX1	-0.0495994	-0.492857	-0.443604	1.26597e-09
ENSG00000185627.13	PSMD13	-0.0620199	-0.570607	-0.509144	1.35264e-09
ENSG00000242372.2	EIF6	0.0722394	-0.458106	-0.530966	1.36095e-09
ENSG00000171988.13	JMJD1C	0.277094	-0.382247	-0.659935	1.38645e-09
ENSG00000119655.4	NPC2	0.0210836	-0.928741	-0.952592	1.39117e-09
ENSG00000136938.8	ANP32B	-0.237797	-0.919829	-0.68364	1.39447e-09
ENSG00000128739.16	SNRPN	0.632581	-0.811927	-1.44909	1.39608e-09
ENSG00000134001.8	EIF2S1	-0.0170617	-0.529757	-0.513283	1.40281e-09
ENSG00000143418.15	CERS2	-0.0122978	-0.702614	-0.691857	1.40623e-09
ENSG00000120438.7	TCP1	-0.173758	-0.600469	-0.427207	1.45087e-09
ENSG00000169679.10	BUB1	-0.319374	-0.800776	-0.482412	1.46032e-09
ENSG00000110713.11	NUP98	0.0192928	-0.391152	-0.410898	1.47643e-09
ENSG00000100749.3	VRK1	-0.127402	-0.76651	-0.640204	1.48087e-09
ENSG00000127481.10	UBR4	0.174651	-0.220126	-0.395126	1.49237e-09
ENSG00000100364.14	KIAA0930	0.10876	-0.461134	-0.570759	1.54806e-09
ENSG00000125755.14	SYMPK	0.0718675	-0.327664	-0.399841	1.55095e-09
ENSG00000008869.7	HEATR5B	0.215874	-0.515588	-0.732243	1.59004e-09
ENSG00000065268.6	WDR18	-0.0442131	-0.581342	-0.537666	1.61632e-09
ENSG00000129562.6	DAD1	0.013852	-0.576192	-0.590718	1.6299e-09
ENSG00000023228.9	NDUFS1	0.0617273	-0.339069	-0.401022	1.65115e-09
ENSG00000117748.5	RPA2	-0.103856	-0.831494	-0.729501	1.66419e-09
ENSG00000092841.14	MYL6	0.185505	-0.132773	-0.318119	1.6678e-09
ENSG00000164442.8	CITED2	-0.0381892	-0.501108	-0.463303	1.66818e-09
ENSG00000130706.8	ADRM1	-0.109923	-0.65011	-0.540776	1.70942e-09
ENSG00000155660.6	PDIA4	-0.311266	-0.671493	-0.36075	1.71554e-09
ENSG00000091483.6	FH	-0.170123	-0.618472	-0.448989	1.81254e-09
ENSG00000153201.11	RANBP2	0.0484164	-0.487665	-0.536961	1.82679e-09
ENSG00000033050.3	ABCF2	0.0388585	-0.615929	-0.656161	1.84342e-09
ENSG00000022277.8	RTFDC1	0.0969731	-0.438624	-0.536332	1.84342e-09
ENSG00000104419.10	NDRG1	-0.0428891	-0.409283	-0.366718	1.84951e-09
ENSG00000167925.11	GHDC	0.0560254	-0.76471	-0.822788	1.86219e-09
ENSG00000104852.10	SNRNP70	0.0354656	-0.354945	-0.390844	1.9216e-09
ENSG00000122218.10	COPA	0.0845085	-0.262694	-0.347441	1.92406e-09
ENSG00000112739.12	PRPF4B	0.08874	-0.640457	-0.730405	1.96787e-09
ENSG00000136485.10	DCAF7	0.0738102	-0.362969	-0.437236	2.06945e-09
ENSG00000157184.5	CPT2	0.20241	-0.500898	-0.704008	2.08649e-09
ENSG00000153406.9	NMRAL1	0.228255	-0.602996	-0.832999	2.18686e-09
ENSG00000143384.8	MCL1	-0.101541	-0.615336	-0.514489	2.20515e-09
ENSG00000174197.12	MGA	0.0987431	-0.54005	-0.63989	2.30594e-09
ENSG00000074201.4	CLNS1A	-0.0945437	-0.644612	-0.551031	2.30594e-09
ENSG00000135451.8	TROAP	-0.199274	-1.65208	-1.46289	2.32691e-09
ENSG00000167004.8	PDIA3	-0.158784	-0.616135	-0.457918	2.39455e-09
ENSG00000151503.8	NCAPD3	-0.230851	-0.746659	-0.516502	2.45382e-09
ENSG00000107099.11	DOCK8	0.121368	-0.227952	-0.349457	2.5041e-09
ENSG00000167977.4	KCTD5	0.208349	-0.699133	-0.909432	2.53348e-09
ENSG00000121152.5	NCAPH	-0.315784	-1.00518	-0.691104	2.53348e-09
ENSG00000038358.10	EDC4	0.0528416	-0.525197	-0.57894	2.61305e-09
ENSG00000171310.6	CHST11	-0.0579911	-0.563613	-0.506017	2.75115e-09
ENSG00000065526.6	SPEN	-0.141015	-0.821796	-0.682656	2.8033e-09
ENSG00000254986.3	DPP3	0.136943	-0.355331	-0.492706	2.8033e-09
ENSG00000135446.12	CDK4	-0.0910002	-0.774287	-0.684956	2.8187e-09
ENSG00000116584.13	ARHGEF2	0.0206694	-0.385923	-0.407077	2.83983e-09
ENSG00000168175.10	MAPK1IP1L	-0.092679	-0.753206	-0.662123	2.90639e-09
ENSG00000113048.12	MRPS27	-0.128761	-0.771114	-0.64393	3.0129e-09
ENSG00000107937.14	GTPBP4	-0.0191495	-0.546894	-0.52842	3.15062e-09
ENSG00000170802.11	FOXN2	0.171543	-0.968972	-1.14531	3.19171e-09
ENSG00000006744.14	ELAC2	-0.0129548	-0.527352	-0.515195	3.25622e-09
ENSG00000132274.11	TRIM22	0.843994	0.339487	-0.504295	3.33195e-09
ENSG00000139218.13	SCAF11	0.0861222	-0.321318	-0.407783	3.33195e-09
ENSG00000067057.12	PFKP	-0.0355166	-0.409239	-0.374168	3.62816e-09
ENSG00000085377.9	PREP	0.0332893	-0.508054	-0.542335	3.74304e-09
ENSG00000084754.6	HADHA	0.0350872	-0.355351	-0.39079	3.78351e-09
ENSG00000105329.5	TGFB1	-0.043183	-0.444529	-0.401913	3.79358e-09
ENSG00000184897.4	H1FX	-0.0817305	-0.653268	-0.572131	3.87319e-09
ENSG00000133706.13	LARS	-0.0514076	-0.393244	-0.341921	3.87319e-09
ENSG00000100591.3	AHSA1	-0.15986	-0.654328	-0.495101	3.88063e-09
ENSG00000188021.7	UBQLN2	-0.0694803	-0.733421	-0.665182	3.91895e-09
ENSG00000130522.4	JUND	-0.294728	-0.809777	-0.515709	3.91895e-09
ENSG00000080345.13	RIF1	-0.0204641	-0.630286	-0.610809	3.9288e-09
ENSG00000180198.11	RCC1	-0.363386	-1.00916	-0.647363	4.15487e-09
ENSG00000134440.7	NARS	-0.0730347	-0.478209	-0.40546	4.16345e-09
ENSG00000094914.8	AAAS	-0.182019	-0.893084	-0.7126	4.37622e-09
ENSG00000004455.12	AK2	-0.00131552	-0.610588	-0.610097	4.43248e-09
ENSG00000131143.4	COX4I1	0.027315	-0.300913	-0.328172	4.49407e-09
ENSG00000101365.16	IDH3B	0.0322303	-0.542149	-0.574892	4.5412e-09
ENSG00000142507.5	PSMB6	-0.0362182	-0.517275	-0.481833	4.62556e-09
ENSG00000168090.5	COPS6	0.155797	-0.465663	-0.62248	4.6666e-09
ENSG00000139180.6	NDUFA9	0.093523	-0.665816	-0.760546	4.66738e-09
ENSG00000205531.8	NAP1L4	-0.0622643	-0.710493	-0.649506	4.78218e-09
ENSG00000183258.7	DDX41	0.0279235	-0.575312	-0.603886	5.01359e-09
ENSG00000100316.11	RPL3	-0.572162	-0.913682	-0.342146	5.01359e-09
ENSG00000173113.2	TRMT112	0.028285	-0.739472	-0.769862	5.2579e-09
ENSG00000069329.11	VPS35	0.0136579	-0.434248	-0.448407	5.26273e-09
ENSG00000115368.5	WDR75	0.211065	-0.482694	-0.694741	5.2886e-09
ENSG00000162736.11	NCSTN	0.14669	-0.342204	-0.489109	5.72702e-09
ENSG00000172493.16	AFF1	0.094473	-0.489385	-0.58482	5.76426e-09
ENSG00000130119.11	GNL3L	0.0238912	-0.516917	-0.541673	5.84504e-09
ENSG00000140350.11	ANP32A	0.0342737	-0.385611	-0.420206	5.84504e-09
ENSG00000104894.7	CD37	0.217685	-0.178337	-0.396224	5.90066e-09
ENSG00000104889.4	RNASEH2A	-0.278405	-0.74444	-0.466617	5.96524e-09
ENSG00000101972.14	STAG2	0.0206649	-0.468675	-0.489632	6.02294e-09
ENSG00000167770.7	OTUB1	0.166587	-0.346175	-0.513057	6.03115e-09
ENSG00000179409.6	GEMIN4	-0.106618	-0.661952	-0.556147	6.13774e-09
ENSG00000126461.10	SCAF1	-0.0348548	-0.573088	-0.539246	6.13774e-09
ENSG00000112282.13	MED23	0.153949	-0.785495	-0.941898	6.25077e-09
ENSG00000105486.9	LIG1	-0.108025	-0.537894	-0.430097	6.39238e-09
ENSG00000175110.7	MRPS22	-0.0645371	-0.744743	-0.681892	6.60142e-09
ENSG00000198815.4	FOXJ3	0.165452	-0.460841	-0.627399	6.60142e-09
ENSG00000174851.10	YIF1A	0.134405	-0.818759	-0.955906	6.73851e-09
ENSG00000110107.4	PRPF19	-0.0780502	-0.433052	-0.355404	6.74415e-09
ENSG00000153767.5	GTF2E1	0.0495612	-0.941583	-0.994532	6.81435e-09
ENSG00000186298.7	PPP1CC	-0.12527	-0.759387	-0.635244	7.1587e-09
ENSG00000135916.11	ITM2C	0.364814	-0.142775	-0.507851	7.16581e-09
ENSG00000067560.6	RHOA	0.0141997	-0.307265	-0.321508	7.22658e-09
ENSG00000169251.8	NMD3	0.101015	-0.756074	-0.859604	7.31961e-09
ENSG00000169439.7	SDC2	-0.00384784	-0.741575	-0.739717	7.36867e-09
ENSG00000157637.8	SLC38A10	0.042496	-0.385743	-0.428449	7.37865e-09
ENSG00000126602.6	TRAP1	0.110448	-0.276356	-0.387165	7.63291e-09
ENSG00000100092.16	SH3BP1	0.176928	-0.543361	-0.721268	7.63826e-09
ENSG00000112996.5	MRPS30	0.0687812	-0.610725	-0.680409	7.7116e-09
ENSG00000134987.7	WDR36	0.0505519	-0.519374	-0.570802	7.80374e-09
ENSG00000149806.6	FAU	0.0867052	-0.278036	-0.364945	7.82286e-09
ENSG00000058804.10	NDC1	-0.276135	-1.19264	-0.920339	7.85729e-09
ENSG00000168172.4	HOOK3	0.22836	-0.347463	-0.576127	7.97406e-09
ENSG00000062485.14	CS	0.02295	-0.447763	-0.471249	8.26857e-09
ENSG00000119285.6	HEATR1	0.0191971	-0.473931	-0.493644	8.37601e-09
ENSG00000109113.13	RAB34	-0.092214	-1.0199	-0.930996	8.436e-09
ENSG00000142039.3	CCDC97	0.0773229	-0.999999	-1.08242	8.46221e-09
ENSG00000065883.10	CDK13	-0.012075	-0.676922	-0.666282	8.46221e-09
ENSG00000110876.8	SELPLG	0.353241	-0.19401	-0.547797	8.85958e-09
ENSG00000105011.4	ASF1B	-0.429427	-1.27009	-0.844151	9.04765e-09
ENSG00000149084.7	HSD17B12	0.111737	-0.473657	-0.585815	9.04765e-09
ENSG00000004864.9	SLC25A13	-0.157972	-1.51706	-1.369	9.15472e-09
ENSG00000132780.12	NASP	-0.244446	-0.618355	-0.374573	9.34659e-09
ENSG00000088325.11	TPX2	-0.394085	-0.912354	-0.519084	9.73228e-09
ENSG00000115241.9	PPM1G	-0.121224	-0.523131	-0.402194	9.73228e-09
ENSG00000124782.15	RREB1	0.101169	-0.422233	-0.524216	9.75915e-09
ENSG00000125912.6	NCLN	-0.0900301	-0.640576	-0.551671	1.0216e-08
ENSG00000145191.7	EIF2B5	0.0239669	-0.659294	-0.684695	1.04582e-08
ENSG00000105447.8	GRWD1	-0.0557425	-0.581015	-0.526217	1.04675e-08
ENSG00000135506.11	OS9	0.0864699	-0.256032	-0.342525	1.0471e-08
ENSG00000113282.9	CLINT1	0.0246621	-0.478463	-0.503587	1.05505e-08
ENSG00000198339.3	HIST1H4I	-0.259226	-0.55675	-0.297853	1.08622e-08
ENSG00000136436.10	CALCOCO2	0.111057	-0.346119	-0.457357	1.09628e-08
ENSG00000086061.11	DNAJA1	-0.163131	-0.570887	-0.408326	1.12669e-08
ENSG00000100029.13	PES1	-0.0284837	-0.521768	-0.493896	1.1322e-08
ENSG00000108312.10	UBTF	-0.00347625	-0.636187	-0.634074	1.14166e-08
ENSG00000198961.5	PJA2	0.0099643	-0.490588	-0.501129	1.14166e-08
ENSG00000171320.10	ESCO2	-0.27953	-1.06289	-0.785681	1.19695e-08
ENSG00000165525.13	NEMF	0.176045	-0.638491	-0.816799	1.20771e-08
ENSG00000156110.9	ADK	0.13287	-0.419714	-0.55305	1.23987e-08
ENSG00000198848.8	CES1	0.321928	-0.598901	-0.922046	1.25001e-08
ENSG00000119638.8	NEK9	0.144965	-0.435796	-0.581345	1.25972e-08
ENSG00000197299.6	BLM	-0.252964	-0.981058	-0.730251	1.28616e-08
ENSG00000103769.5	RAB11A	0.0494804	-0.641808	-0.692285	1.3089e-08
ENSG00000123983.9	ACSL3	-0.117062	-0.695145	-0.579188	1.35331e-08
ENSG00000164934.9	DCAF13	0.066838	-0.440014	-0.50753	1.38406e-08
ENSG00000129255.10	MPDU1	-0.0254837	-0.713949	-0.689724	1.41028e-08
ENSG00000126883.12	NUP214	0.00327085	-0.483322	-0.48739	1.42131e-08
ENSG00000104320.9	NBN	0.0451186	-0.673771	-0.720244	1.49268e-08
ENSG00000110721.7	CHKA	-0.0354693	-1.02308	-0.9911	1.49484e-08
ENSG00000135372.4	NAT10	-0.000697646	-0.4483	-0.447838	1.50466e-08
ENSG00000174106.2	LEMD3	0.0150563	-0.85561	-0.873593	1.52595e-08
ENSG00000168610.10	STAT3	0.198847	-0.429311	-0.629083	1.53316e-08
ENSG00000168288.8	MMADHC	0.0138841	-0.667424	-0.682364	1.53374e-08
ENSG00000165271.12	NOL6	0.0202582	-0.547488	-0.568697	1.68491e-08
ENSG00000175193.8	PARL	0.127131	-0.772589	-0.902164	1.70624e-08
ENSG00000134644.11	PUM1	-0.263083	-0.824681	-0.563041	1.71833e-08
ENSG00000142207.5	URB1	0.0026106	-0.63743	-0.640976	1.73638e-08
ENSG00000148400.9	NOTCH1	0.138654	-0.255761	-0.394598	1.75432e-08
ENSG00000121060.10	TRIM25	0.0523128	-0.438476	-0.491475	1.78447e-08
ENSG00000140319.6	SRP14	0.127272	-0.293446	-0.420778	1.80036e-08
ENSG00000133119.8	RFC3	-0.372309	-1.29146	-0.92345	1.80089e-08
ENSG00000169919.12	GUSB	0.0303856	-0.484657	-0.515708	1.81858e-08
ENSG00000130935.5	NOL11	-0.0155534	-0.645891	-0.631387	1.82075e-08
ENSG00000110917.3	MLEC	-0.131285	-0.79518	-0.665486	1.86668e-08
ENSG00000133243.4	BTBD2	0.0563041	-0.752562	-0.811378	1.86693e-08
ENSG00000138029.9	HADHB	0.248528	-0.127886	-0.376752	1.92211e-08
ENSG00000124571.13	XPO5	-0.0209906	-0.503662	-0.483072	1.92325e-08
ENSG00000101160.9	CTSZ	0.129464	-0.37767	-0.507474	1.92402e-08
ENSG00000108528.9	SLC25A11	-0.0136925	-0.75725	-0.745005	1.97391e-08
ENSG00000131171.8	SH3BGRL	0.468564	-0.139499	-0.608003	1.98241e-08
ENSG00000065150.14	IPO5	-0.19692	-0.59561	-0.399299	2.00737e-08
ENSG00000167792.7	NDUFV1	0.0830461	-0.329667	-0.413089	2.0312e-08
ENSG00000130724.4	CHMP2A	0.122812	-0.394859	-0.518101	2.14933e-08
ENSG00000120526.6	NUDCD1	-0.0140249	-0.710493	-0.697612	2.1683e-08
ENSG00000125734.9	GPR108	0.120469	-0.481011	-0.602115	2.18639e-08
ENSG00000162676.7	GFI1	0.0896959	-0.41366	-0.503607	2.20146e-08
ENSG00000072571.15	HMMR	-0.263763	-0.953079	-0.691096	2.21162e-08
ENSG00000143119.8	CD53	0.20519	-0.197699	-0.403273	2.21345e-08
ENSG00000100304.12	TTLL12	-0.0295434	-0.523097	-0.49392	2.24576e-08
ENSG00000159720.7	ATP6V0D1	0.161941	-0.300101	-0.462635	2.24576e-08
ENSG00000125818.13	PSMF1	0.0648439	-0.572889	-0.639156	2.32862e-08
ENSG00000136261.10	BZW2	0.0642056	-0.381679	-0.446069	2.36849e-08
ENSG00000101161.6	PRPF6	0.0815015	-0.336142	-0.417749	2.39139e-08
ENSG00000172172.3	MRPL13	-0.114398	-0.711374	-0.598406	2.46292e-08
ENSG00000170638.5	TRABD	0.0371227	-0.703383	-0.742389	2.47808e-08
ENSG00000166337.5	TAF10	0.144278	-0.879145	-1.02749	2.48989e-08
ENSG00000110880.6	CORO1C	-0.00836637	-0.60248	-0.595352	2.55498e-08
ENSG00000081237.14	PTPRC	0.248329	-0.228941	-0.477506	2.60173e-08
ENSG00000165119.14	HNRNPK	-0.043907	-0.322249	-0.278581	2.66208e-08
ENSG00000113328.14	CCNG1	0.353572	-0.342686	-0.697222	2.74674e-08
ENSG00000188486.3	H2AFX	-0.349655	-0.829734	-0.480982	2.74674e-08
ENSG00000173039.14	RELA	0.0227569	-0.666576	-0.691098	2.75283e-08
ENSG00000249115.4	HAUS5	-0.196998	-1.42999	-1.24006	2.8545e-08
ENSG00000113643.4	RARS	-0.00822594	-0.527366	-0.519567	2.91994e-08
ENSG00000139684.9	ESD	0.0104726	-0.448357	-0.459134	2.93841e-08
ENSG00000198911.7	SREBF2	-0.0119551	-0.390998	-0.379144	2.97011e-08
ENSG00000117139.12	KDM5B	0.207389	-0.27077	-0.47853	2.97735e-08
ENSG00000014216.11	CAPN1	0.149952	-0.247762	-0.397858	2.9851e-08
ENSG00000130755.8	GMFG	0.0273112	-0.267347	-0.294879	3.04294e-08
ENSG00000138758.7	SEPT11	-0.0490712	-0.730239	-0.683042	3.06113e-08
ENSG00000088205.8	DDX18	-0.0513884	-0.611303	-0.560929	3.07562e-08
ENSG00000112249.9	ASCC3	0.380675	-0.169925	-0.550652	3.14506e-08
ENSG00000104907.8	TRMT1	-0.0186019	-0.927068	-0.911875	3.19727e-08
ENSG00000100219.12	XBP1	-0.103795	-0.547488	-0.444185	3.19727e-08
ENSG00000103152.7	MPG	0.115477	-0.604698	-0.721909	3.2484e-08
ENSG00000255112.2	CHMP1B	0.069662	-0.820676	-0.893084	3.26149e-08
ENSG00000111361.8	EIF2B1	0.0423108	-0.72514	-0.769882	3.29405e-08
ENSG00000132471.7	WBP2	0.0380815	-0.49799	-0.53696	3.29405e-08
ENSG00000108256.4	NUFIP2	0.0897594	-0.446198	-0.536336	3.29405e-08
ENSG00000139618.10	BRCA2	-0.0880831	-0.944858	-0.859574	3.29545e-08
ENSG00000123636.13	BAZ2B	0.180339	-0.492768	-0.674142	3.3283e-08
ENSG00000148672.7	GLUD1	0.197573	-0.330148	-0.528262	3.3293e-08
ENSG00000121064.8	SCPEP1	0.367952	-0.290341	-0.658605	3.33963e-08
ENSG00000165417.7	GTF2A1	-0.197271	-1.04439	-0.85082	3.3909e-08
ENSG00000072778.15	ACADVL	0.039821	-0.277942	-0.318082	3.41617e-08
ENSG00000160752.10	FDPS	-0.186116	-0.538966	-0.353172	3.42577e-08
ENSG00000161813.16	LARP4	0.0262364	-0.718486	-0.746946	3.54382e-08
ENSG00000142453.7	CARM1	-0.131709	-0.883976	-0.754746	3.67309e-08
ENSG00000041357.11	PSMA4	0.0154813	-0.377038	-0.392951	3.68332e-08
ENSG00000033011.7	ALG1	0.0497026	-0.936434	-0.98995	3.86428e-08
ENSG00000196839.8	ADA	0.675749	-0.0724082	-0.747996	3.89444e-08
ENSG00000035403.12	VCL	0.125408	-0.368899	-0.494582	3.98288e-08
ENSG00000127483.13	HP1BP3	-0.0133509	-0.431648	-0.418568	4.07122e-08
ENSG00000125743.6	SNRPD2	-0.0313268	-0.352982	-0.322049	4.19181e-08
ENSG00000183530.9	PRR14L	-0.0324983	-0.706953	-0.675758	4.30139e-08
ENSG00000130414.7	NDUFA10	0.00365103	-0.584962	-0.589728	4.30608e-08
ENSG00000137713.11	PPP2R1B	-0.0996729	-0.814208	-0.715981	4.35376e-08
ENSG00000107651.8	SEC23IP	0.0444421	-0.530514	-0.575716	4.35376e-08
ENSG00000077454.11	LRCH4	0.227954	-0.429392	-0.658307	4.41777e-08
ENSG00000169375.11	SIN3A	-0.0935091	-0.643856	-0.551594	4.48512e-08
ENSG00000189079.11	ARID2	0.0697974	-0.578621	-0.649929	4.4908e-08
ENSG00000130313.2	PGLS	0.105325	-0.375404	-0.481256	4.60074e-08
ENSG00000101336.8	HCK	0.380736	-0.0591956	-0.440198	4.83991e-08
ENSG00000128626.7	MRPS12	0.0232287	-0.666576	-0.691216	4.84025e-08
ENSG00000092201.5	SUPT16H	-0.088315	-0.450869	-0.362799	4.84025e-08
ENSG00000149187.13	CELF1	0.0174243	-0.863498	-0.883957	4.89027e-08
ENSG00000121892.10	PDS5A	0.0309834	-0.503631	-0.535605	4.91383e-08
ENSG00000103365.11	GGA2	0.206288	-0.302408	-0.509381	5.03763e-08
ENSG00000204843.8	DCTN1	0.11544	-0.373643	-0.489611	5.04732e-08
ENSG00000065548.13	ZC3H15	-0.125469	-0.826935	-0.703708	5.25714e-08
ENSG00000138018.13	EPT1	0.00938792	-1.11548	-1.1303	5.30013e-08
ENSG00000103257.4	SLC7A5	-0.379067	-0.795688	-0.417371	5.32526e-08
ENSG00000183617.4	MRPL54	-0.00580781	-0.76471	-0.761302	5.37507e-08
ENSG00000162063.8	CCNF	-0.246888	-0.909802	-0.664623	5.39027e-08
ENSG00000116062.10	MSH6	-0.27291	-0.705994	-0.433791	5.41603e-08
ENSG00000073578.12	SDHA	0.182041	-0.261687	-0.444253	5.5371e-08
ENSG00000108829.9	LRRC59	-0.227647	-0.720517	-0.493872	5.98062e-08
ENSG00000111530.8	CAND1	-0.00598038	-0.449185	-0.4436	6.19242e-08
ENSG00000168488.14	ATXN2L	-0.127007	-0.534877	-0.408335	6.19242e-08
ENSG00000143549.15	TPM3	0.0129402	-0.559153	-0.573108	6.2451e-08
ENSG00000100811.6	YY1	-0.0689611	-0.690979	-0.623595	6.28765e-08
ENSG00000213619.5	NDUFS3	0.11172	-0.438121	-0.550466	6.28765e-08
ENSG00000136986.5	DERL1	-0.0138074	-0.618515	-0.605712	6.36916e-08
ENSG00000131844.11	MCCC2	0.122927	-0.455843	-0.579296	6.46205e-08
ENSG00000100353.13	EIF3D	-0.330828	-0.653804	-0.323425	6.49786e-08
ENSG00000185201.12	IFITM2	0.393515	-0.00971493	-0.403121	6.6489e-08
ENSG00000108946.10	PRKAR1A	0.165481	-0.198151	-0.363556	6.73168e-08
ENSG00000110057.3	UNC93B1	0.227534	-0.259583	-0.487305	6.73387e-08
ENSG00000173198.4	CYSLTR1	0.42343	-0.406909	-0.831839	6.75785e-08
ENSG00000205937.7	RNPS1	-0.516526	-1.44746	-0.936192	6.94693e-08
ENSG00000156467.5	UQCRB	0.129992	-0.349782	-0.480076	7.13708e-08
ENSG00000167468.12	GPX4	-0.0256509	-0.60073	-0.576035	7.18229e-08
ENSG00000188986.4	NELFB	0.0176331	-0.679599	-0.698979	7.2194e-08
ENSG00000142227.6	EMP3	0.02776	-0.332493	-0.360646	7.2194e-08
ENSG00000164024.7	METAP1	-0.0693633	-0.811097	-0.744055	7.33831e-08
ENSG00000105953.10	OGDH	0.129896	-0.257854	-0.388086	7.38939e-08
ENSG00000102524.7	TNFSF13B	0.633523	-0.520831	-1.15794	7.41319e-08
ENSG00000105254.7	TBCB	0.0305316	-0.594007	-0.625949	7.42114e-08
ENSG00000021355.8	SERPINB1	0.160499	-0.352881	-0.513575	7.49298e-08
ENSG00000104133.10	SPG11	0.125806	-0.442518	-0.569273	7.68703e-08
ENSG00000114779.15	ABHD14B	-0.0443109	-0.949016	-0.908451	7.83694e-08
ENSG00000127586.12	CHTF18	-0.285598	-1.24005	-0.958918	8.05802e-08
ENSG00000047849.17	MAP4	-0.0651342	-0.526342	-0.462001	8.11113e-08
ENSG00000100220.7	RTCB	-0.0530656	-0.52447	-0.471795	8.387e-08
ENSG00000156471.8	PTDSS1	-0.120436	-0.608046	-0.488132	8.39622e-08
ENSG00000164430.11	MB21D1	0.0748558	-0.588628	-0.665063	8.47196e-08
ENSG00000184432.5	COPB2	-0.0825545	-0.443606	-0.361201	8.47735e-08
ENSG00000141526.10	SLC16A3	-0.0599541	-0.36944	-0.309833	8.63993e-08
ENSG00000168758.6	SEMA4C	0.0670982	-0.93029	-1.00193	8.64913e-08
ENSG00000149485.12	FADS1	-0.283392	-0.775162	-0.492957	8.81765e-08
ENSG00000155189.7	AGPAT5	-0.0327663	-0.587559	-0.555902	8.82275e-08
ENSG00000176783.10	RUFY1	0.0169178	-0.778973	-0.797867	8.88065e-08
ENSG00000151465.9	CDC123	0.0360083	-0.3283	-0.364506	9.07116e-08
ENSG00000104325.2	DECR1	0.139406	-0.397453	-0.537643	9.17487e-08
ENSG00000167553.10	TUBA1C	-0.232142	-0.695145	-0.46381	9.17954e-08
ENSG00000175220.7	ARHGAP1	0.0952403	-0.333168	-0.428966	9.26423e-08
ENSG00000117133.6	RPF1	-0.0168139	-0.695145	-0.6796	9.3059e-08
ENSG00000104518.6	GSDMD	-0.0208383	-0.609485	-0.589992	9.41881e-08
ENSG00000163655.11	GMPS	-0.0568523	-0.463273	-0.407063	9.41881e-08
ENSG00000100650.11	SRSF5	-0.0192184	-0.329177	-0.309946	9.45339e-08
ENSG00000185883.6	ATP6V0C	0.460025	-0.287098	-0.747756	9.62436e-08
ENSG00000013364.14	MVP	0.695486	0.0727566	-0.622662	9.85751e-08
ENSG00000138385.11	SSB	-0.157722	-0.726981	-0.570743	9.88388e-08
ENSG00000133112.12	TPT1	0.0938012	-0.385377	-0.479476	9.9132e-08
ENSG00000121749.11	TBC1D15	0.0426414	-0.614915	-0.658616	9.99979e-08
ENSG00000162517.8	PEF1	0.0202899	-0.833538	-0.856603	1.01446e-07
ENSG00000115307.12	AUP1	0.000144323	-0.643856	-0.645505	1.01549e-07
ENSG00000078618.15	NRD1	0.0267795	-0.382682	-0.410026	1.06211e-07
ENSG00000100462.11	PRMT5	0.0850425	-0.356816	-0.442467	1.06932e-07
ENSG00000142798.12	HSPG2	0.419292	0.0643595	-0.354695	1.08081e-07
ENSG00000174791.6	RIN1	-0.0236861	-1.04264	-1.02324	1.12669e-07
ENSG00000068697.6	LAPTM4A	0.206107	-0.408696	-0.61526	1.12669e-07
ENSG00000077152.5	UBE2T	-0.219438	-1.00817	-0.79155	1.14129e-07
ENSG00000132792.14	CTNNBL1	0.0516343	-0.708951	-0.762562	1.14129e-07
ENSG00000169021.4	UQCRFS1	0.0171858	-0.623067	-0.641551	1.16175e-07
ENSG00000127445.9	PIN1	-0.0221531	-0.859822	-0.840587	1.19002e-07
ENSG00000125991.14	ERGIC3	0.0858744	-0.424139	-0.510848	1.2047e-07
ENSG00000103335.15	PIEZO1	0.0463249	-0.373458	-0.420075	1.21067e-07
ENSG00000182511.7	FES	0.4498	-0.00432572	-0.454072	1.2181e-07
ENSG00000163535.13	SGOL2	-0.106411	-0.820775	-0.71677	1.22988e-07
ENSG00000143753.8	DEGS1	0.121677	-0.460156	-0.58255	1.2675e-07
ENSG00000180596.7	HIST1H2BC	-0.277794	-0.536109	-0.258562	1.2675e-07
ENSG00000169385.2	RNASE2	-0.0486661	-0.609048	-0.561168	1.29624e-07
ENSG00000161011.15	SQSTM1	-0.0961757	-0.522102	-0.42652	1.38806e-07
ENSG00000100296.9	THOC5	-0.0203381	-0.787696	-0.769426	1.39699e-07
ENSG00000148943.7	LIN7C	0.13259	-0.671767	-0.80656	1.40631e-07
ENSG00000147140.11	NONO	-0.156781	-0.463375	-0.306901	1.41039e-07
ENSG00000100442.6	FKBP3	0.0105407	-0.699421	-0.711404	1.43102e-07
ENSG00000161671.12	EMC10	0.0858031	-0.442274	-0.528837	1.43102e-07
ENSG00000117593.8	DARS2	-0.305591	-0.928107	-0.624323	1.51145e-07
ENSG00000047315.10	POLR2B	0.0145966	-0.325005	-0.339633	1.51556e-07
ENSG00000065518.7	NDUFB4	0.0291821	-0.517399	-0.54713	1.5491e-07
ENSG00000137161.12	CNPY3	0.12988	-0.62293	-0.754568	1.56035e-07
ENSG00000152291.9	TGOLN2	0.0579732	-0.325468	-0.383763	1.56035e-07
ENSG00000004059.6	ARF5	0.0944888	-0.704175	-0.800961	1.61756e-07
ENSG00000169032.5	MAP2K1	0.0658962	-0.93029	-0.999919	1.66195e-07
ENSG00000239264.4	TXNDC5	-0.29991	-0.890549	-0.591934	1.70884e-07
ENSG00000165916.4	PSMC3	-0.197684	-0.587439	-0.390309	1.76723e-07
ENSG00000213563.2	C8orf82	0.0524746	-1.08746	-1.14659	1.7745e-07
ENSG00000161800.8	RACGAP1	-0.297792	-0.87044	-0.57385	1.80645e-07
ENSG00000101224.13	CDC25B	-0.254964	-1.18641	-0.936339	1.80996e-07
ENSG00000124813.16	RUNX2	0.125692	-0.45435	-0.581076	1.80996e-07
ENSG00000086598.6	TMED2	-0.124867	-0.923037	-0.802778	1.85557e-07
ENSG00000103876.7	FAH	0.23274	-0.348486	-0.581594	1.89126e-07
ENSG00000103319.7	EEF2K	0.15571	-0.732895	-0.891082	1.92078e-07
ENSG00000134308.9	YWHAQ	-0.100138	-0.571488	-0.471904	2.00725e-07
ENSG00000076248.6	UNG	-0.356398	-1.11075	-0.756799	2.04328e-07
ENSG00000101367.8	MAPRE1	-0.0241705	-0.548983	-0.525644	2.05924e-07
ENSG00000105171.5	POP4	-0.0645689	-0.652866	-0.589172	2.09375e-07
ENSG00000196154.7	S100A4	0.364058	0.0831019	-0.280984	2.12366e-07
ENSG00000069275.12	NUCKS1	-0.169797	-0.545824	-0.376723	2.12949e-07
ENSG00000100644.12	HIF1A	0.125375	-0.638491	-0.766039	2.12974e-07
ENSG00000103932.7	RPAP1	-0.0387474	-0.771522	-0.735024	2.14898e-07
ENSG00000113649.7	TCERG1	-0.0187884	-0.536288	-0.518193	2.24815e-07
ENSG00000100055.16	CYTH4	0.324123	-0.265811	-0.590353	2.30653e-07
ENSG00000083312.13	TNPO1	-0.0800548	-0.598901	-0.519604	2.31991e-07
ENSG00000123562.12	MORF4L2	-0.108433	-0.620477	-0.513217	2.35152e-07
ENSG00000138326.14	RPS24	-0.688317	-1.08283	-0.395587	2.35311e-07
ENSG00000094916.9	CBX5	-0.0313259	-0.614346	-0.584537	2.36199e-07
ENSG00000143442.17	POGZ	-0.0441359	-0.706641	-0.664229	2.3828e-07
ENSG00000119041.6	GTF3C3	0.0175396	-0.645716	-0.664512	2.42562e-07
ENSG00000129911.4	KLF16	-0.13863	-1.11103	-0.977966	2.42964e-07
ENSG00000168385.13	SEPT2	0.02303	-0.417506	-0.441134	2.45393e-07
ENSG00000157191.15	NECAP2	0.114692	-0.748461	-0.865905	2.46769e-07
ENSG00000156515.17	HK1	0.138991	-0.440996	-0.581071	2.48374e-07
ENSG00000143337.14	TOR1AIP1	0.0455408	-0.405156	-0.450971	2.48374e-07
ENSG00000146247.13	PHIP	0.128735	-0.580543	-0.710748	2.48607e-07
ENSG00000167721.6	TSR1	-0.0742041	-0.574139	-0.500855	2.48607e-07
ENSG00000069424.10	KCNAB2	-0.0238424	-0.490051	-0.466861	2.48607e-07
ENSG00000160999.8	SH2B2	1.54432	-1.09311	-2.65281	2.49293e-07
ENSG00000068654.11	POLR1A	0.0810525	-0.357997	-0.439326	2.51186e-07
ENSG00000152270.4	PDE3B	0.0419693	-0.565333	-0.608295	2.57313e-07
ENSG00000135655.9	USP15	0.226963	-0.372371	-0.599903	2.57379e-07
ENSG00000198730.3	CTR9	0.09337	-0.474538	-0.568838	2.65037e-07
ENSG00000109180.10	OCIAD1	0.0111765	-0.564905	-0.57698	2.66682e-07
ENSG00000014164.6	ZC3H3	0.0771432	-0.661414	-0.74023	2.66779e-07
ENSG00000128016.4	ZFP36	-0.00359693	-0.617095	-0.614639	2.6998e-07
ENSG00000102978.8	POLR2C	-0.0184516	-0.751179	-0.734459	2.70135e-07
ENSG00000188976.6	NOC2L	0.0561988	-0.422065	-0.478539	2.70135e-07
ENSG00000134684.6	YARS	-0.300816	-0.73597	-0.435943	2.78357e-07
ENSG00000060688.8	SNRNP40	-0.05374	-0.575594	-0.522859	2.82069e-07
ENSG00000175130.6	MARCKSL1	0.33246	-0.401362	-0.734836	2.83011e-07
ENSG00000156709.9	AIFM1	-0.0216986	-0.515174	-0.49423	2.83606e-07
ENSG00000141349.4	G6PC3	0.0227251	-0.67974	-0.704175	2.87906e-07
ENSG00000013810.14	TACC3	-0.254994	-0.646691	-0.392387	2.89917e-07
ENSG00000038274.12	MAT2B	0.00828799	-0.590961	-0.600596	2.90511e-07
ENSG00000260916.1	CCPG1	-0.205912	-0.764187	-0.559477	2.90933e-07
ENSG00000126777.13	KTN1	-0.0397079	-0.807354	-0.769876	2.93321e-07
ENSG00000123146.15	CD97	0.111834	-0.145274	-0.257098	2.96589e-07
ENSG00000151876.8	FBXO4	-0.215674	-1.3297	-1.12136	2.96675e-07
ENSG00000188186.6	LAMTOR4	0.0667013	-0.574393	-0.64268	2.97014e-07
ENSG00000138964.12	PARVG	0.176603	-0.177104	-0.353711	2.97014e-07
ENSG00000100393.9	EP300	-0.0387287	-0.519238	-0.481074	2.97789e-07
ENSG00000160633.8	SAFB	-0.15309	-0.57586	-0.423561	3.03921e-07
ENSG00000125676.15	THOC2	0.138169	-0.349098	-0.487515	3.05434e-07
ENSG00000076685.14	NT5C2	-0.0363546	-0.633677	-0.598224	3.0947e-07
ENSG00000120533.8	ENY2	0.0646576	-0.551174	-0.616753	3.10687e-07
ENSG00000172292.10	CERS6	0.186646	-0.600392	-0.789155	3.11618e-07
ENSG00000129824.11	RPS4Y1	-0.626651	-0.994279	-0.368256	3.1973e-07
ENSG00000100227.13	POLDIP3	0.0693941	-0.518131	-0.588408	3.2156e-07
ENSG00000104973.10	MED25	0.0778647	-0.371747	-0.450183	3.24917e-07
ENSG00000198900.5	TOP1	-0.0158818	-0.456788	-0.441302	3.24917e-07
ENSG00000150593.11	PDCD4	0.0482621	-0.308122	-0.3564	3.2797e-07
ENSG00000162695.7	SLC30A7	0.163868	-0.732716	-0.899696	3.28995e-07
ENSG00000091947.5	TMEM101	-0.0360256	-1.01355	-0.982255	3.33145e-07
ENSG00000087302.4	C14orf166	-0.0143874	-0.748461	-0.736207	3.42006e-07
ENSG00000137944.12	CCBL2	0.0714794	-0.665264	-0.738329	3.43243e-07
ENSG00000074842.3	C19orf10	-0.159343	-0.609327	-0.450759	3.50233e-07
ENSG00000125257.9	ABCC4	0.179971	-0.595158	-0.777324	3.53666e-07
ENSG00000179862.5	CITED4	-0.148328	-1.12199	-0.978949	3.58837e-07
ENSG00000101557.10	USP14	-0.0903062	-0.574515	-0.484907	3.61524e-07
ENSG00000114021.7	NIT2	-0.00154843	-0.573467	-0.572962	3.62788e-07
ENSG00000169692.8	AGPAT2	-0.0312848	-1.05889	-1.03316	3.65221e-07
ENSG00000135476.7	ESPL1	-0.354947	-1.11681	-0.76542	3.71297e-07
ENSG00000033800.9	PIAS1	0.135167	-0.484033	-0.620265	3.71916e-07
ENSG00000125944.14	HNRNPR	-0.259671	-0.612847	-0.353543	3.73789e-07
ENSG00000136807.7	CDK9	0.031631	-0.632268	-0.665293	3.74124e-07
ENSG00000102977.9	ACD	-0.188648	-0.982722	-0.796823	3.77726e-07
ENSG00000149100.8	EIF3M	0.0156743	-0.312227	-0.328306	3.79993e-07
ENSG00000143294.10	PRCC	0.0292775	-0.665015	-0.696346	3.86915e-07
ENSG00000166902.4	MRPL16	-0.00915666	-0.64261	-0.634437	3.91775e-07
ENSG00000213614.5	HEXA	0.090527	-0.534776	-0.6261	3.95896e-07
ENSG00000125651.9	GTF2F1	-0.0796813	-0.540238	-0.461463	3.96738e-07
ENSG00000114573.5	ATP6V1A	0.257162	-0.26976	-0.527428	4.0192e-07
ENSG00000158290.12	CUL4B	0.220072	-0.584962	-0.806904	4.02579e-07
ENSG00000137752.18	CASP1	0.205589	-0.584962	-0.792147	4.05375e-07
ENSG00000112584.9	FAM120B	0.174206	-0.550552	-0.726548	4.05375e-07
ENSG00000127527.9	EPS15L1	0.0936563	-0.558628	-0.653631	4.06934e-07
ENSG00000139192.7	TAPBPL	0.27557	-1.08406	-1.36959	4.15063e-07
ENSG00000160049.7	DFFA	0.0336024	-1.29956	-1.34381	4.15063e-07
ENSG00000182168.10	UNC5C	-0.108131	-0.57911	-0.471873	4.15516e-07
ENSG00000119414.7	PPP6C	-0.0233972	-0.63743	-0.615426	4.18819e-07
ENSG00000132463.9	GRSF1	0.014737	-0.498069	-0.513527	4.19829e-07
ENSG00000136240.5	KDELR2	-0.111122	-0.868356	-0.760204	4.21183e-07
ENSG00000090861.11	AARS	-0.332425	-0.619255	-0.287246	4.23374e-07
ENSG00000011422.7	PLAUR	-0.205472	-0.670982	-0.466355	4.37766e-07
ENSG00000112742.5	TTK	-0.0539584	-0.786169	-0.734141	4.39364e-07
ENSG00000204120.10	GIGYF2	0.0463833	-0.433821	-0.480992	4.43338e-07
ENSG00000147649.5	MTDH	-0.145989	-0.629109	-0.484229	4.45162e-07
ENSG00000054277.8	OPN3	0.307372	-0.449525	-0.758725	4.48988e-07
ENSG00000048828.12	FAM120A	-0.0570764	-0.497499	-0.441125	4.59123e-07
ENSG00000166200.10	COPS2	0.0846335	-0.56528	-0.651608	4.59652e-07
ENSG00000119392.10	GLE1	-0.104043	-0.647698	-0.544487	4.6199e-07
ENSG00000169299.9	PGM2	0.0976062	-0.474602	-0.572986	4.69674e-07
ENSG00000138399.13	FASTKD1	0.146042	-0.803307	-0.952968	4.84592e-07
ENSG00000178921.9	PFAS	-0.175884	-0.609709	-0.434479	4.97596e-07
ENSG00000145833.11	DDX46	-0.163055	-0.651496	-0.489378	4.98219e-07
ENSG00000106211.8	HSPB1	-0.190009	-0.660758	-0.471744	4.98219e-07
ENSG00000069011.11	PITX1	0.122671	-0.489655	-0.613109	5.11651e-07
ENSG00000196510.8	ANAPC7	0.0190859	-0.539073	-0.558811	5.1853e-07
ENSG00000116001.11	TIA1	0.109205	-0.584962	-0.695546	5.20922e-07
ENSG00000110711.5	AIP	0.134171	-0.413196	-0.548069	5.25009e-07
ENSG00000155368.12	DBI	0.23438	-0.195256	-0.429584	5.34261e-07
ENSG00000103197.12	TSC2	0.256119	-0.377701	-0.634434	5.34467e-07
ENSG00000171634.12	BPTF	0.0353486	-0.578076	-0.614634	5.47256e-07
ENSG00000160201.7	U2AF1	-0.0766736	-0.543486	-0.467632	5.49566e-07
ENSG00000140105.13	WARS	-0.209392	-0.594106	-0.385357	5.57338e-07
ENSG00000113161.11	HMGCR	-0.13156	-0.422532	-0.291044	5.58532e-07
ENSG00000114030.8	KPNA1	0.0405376	-0.571542	-0.61304	5.83552e-07
ENSG00000136271.6	DDX56	0.0403073	-0.45659	-0.497557	5.89672e-07
ENSG00000140688.12	C16orf58	0.178785	-0.600729	-0.781296	6.05904e-07
ENSG00000065000.11	AP3D1	0.0164506	-0.408084	-0.425257	6.13378e-07
ENSG00000178913.5	TAF7	0.0917826	-0.459431	-0.552305	6.17301e-07
ENSG00000117410.9	ATP6V0B	0.00747514	-0.546634	-0.554769	6.26964e-07
ENSG00000146083.7	RNF44	0.0278079	-1.25873	-1.29584	6.28532e-07
ENSG00000011007.8	TCEB3	0.485647	-0.369233	-0.85634	6.29854e-07
ENSG00000147471.7	PROSC	0.0742018	-0.721898	-0.798301	6.30368e-07
ENSG00000185811.12	IKZF1	0.0282285	-0.403722	-0.432427	6.35097e-07
ENSG00000027697.8	IFNGR1	0.153405	-0.590124	-0.745688	6.40059e-07
ENSG00000135776.4	ABCB10	-0.000690799	-0.588102	-0.588836	6.40059e-07
ENSG00000135390.13	ATP5G2	0.0617048	-0.20141	-0.26335	6.40059e-07
ENSG00000143653.9	SCCPDH	0.0126593	-0.889441	-0.905372	6.52088e-07
ENSG00000100883.7	SRP54	-0.121581	-0.689493	-0.569348	6.52088e-07
ENSG00000163714.13	U2SURP	-0.0192966	-0.467126	-0.448639	6.65929e-07
ENSG00000132002.3	DNAJB1	-0.258143	-0.945552	-0.68963	6.6683e-07
ENSG00000147010.13	SH3KBP1	0.0742519	-0.370767	-0.445437	6.81088e-07
ENSG00000108061.7	SHOC2	0.0952728	-0.938599	-1.03863	6.83114e-07
ENSG00000125445.6	MRPS7	0.0121568	-0.716207	-0.730413	6.83114e-07
ENSG00000104529.13	EEF1D	0.0701423	-0.304334	-0.374616	6.83114e-07
ENSG00000126581.8	BECN1	0.0256498	-1.05311	-1.08434	6.8536e-07
ENSG00000179262.5	RAD23A	-0.0369898	-0.629162	-0.593695	6.87997e-07
ENSG00000145386.5	CCNA2	-0.342283	-0.870717	-0.529743	7.0117e-07
ENSG00000079616.8	KIF22	-0.232354	-0.652959	-0.421588	7.08809e-07
ENSG00000117385.11	LEPRE1	0.0480943	-0.574978	-0.624343	7.22096e-07
ENSG00000163156.7	SCNM1	0.34981	-0.367057	-0.717817	7.23971e-07
ENSG00000103254.5	FAM173A	0.135602	-1.1822	-1.32753	7.25602e-07
ENSG00000106305.5	AIMP2	0.0714776	-0.42279	-0.494578	7.29366e-07
ENSG00000089154.6	GCN1L1	0.147343	-0.191951	-0.339363	7.30809e-07
ENSG00000185905.3	C16orf54	0.200924	-0.79468	-1.00014	7.34866e-07
ENSG00000117592.8	PRDX6	0.00146542	-0.461512	-0.463808	7.41016e-07
ENSG00000244754.4	N4BP2L2	0.169256	-0.719099	-0.891599	7.50485e-07
ENSG00000132394.6	EEFSEC	0.0725952	-0.999999	-1.07774	7.57602e-07
ENSG00000026297.11	RNASET2	0.268666	-0.293292	-0.562582	7.70174e-07
ENSG00000149480.2	MTA2	-0.0148487	-0.40188	-0.387366	7.87456e-07
ENSG00000136930.8	PSMB7	-0.0225338	-0.438884	-0.416559	7.93061e-07
ENSG00000161057.6	PSMC2	-0.0331668	-0.490139	-0.457347	7.96034e-07
ENSG00000116830.7	TTF2	-0.15236	-0.729198	-0.578511	8.13873e-07
ENSG00000122482.16	ZNF644	0.128727	-0.610588	-0.741168	8.20968e-07
ENSG00000113758.9	DBN1	0.0876181	-0.707446	-0.797721	8.28146e-07
ENSG00000011114.10	BTBD7	0.104919	-1.23132	-1.34766	8.36104e-07
ENSG00000103313.7	MEFV	0.507219	-0.693896	-1.20575	8.37017e-07
ENSG00000162909.13	CAPN2	0.141935	-0.344876	-0.487602	8.40315e-07
ENSG00000014919.8	COX15	0.0516399	-0.597453	-0.650477	8.48669e-07
ENSG00000013441.11	CLK1	0.0716097	-1.19264	-1.27242	8.48958e-07
ENSG00000133318.9	RTN3	-0.0223662	-0.535789	-0.514595	8.74455e-07
ENSG00000029364.7	SLC39A9	0.17475	-0.563429	-0.740198	8.99804e-07
ENSG00000138802.7	SEC24B	0.0612892	-0.757143	-0.821594	9.10161e-07
ENSG00000113812.9	ACTR8	0.0374536	-0.759866	-0.799792	9.23695e-07
ENSG00000114978.13	MOB1A	0.106672	-0.522146	-0.629693	9.24496e-07
ENSG00000115392.7	FANCL	0.0581875	-1.18641	-1.25343	9.38099e-07
ENSG00000175602.2	CCDC85B	-0.0418509	-1.32193	-1.29146	9.83428e-07
ENSG00000062716.6	VMP1	0.232054	-0.384663	-0.617778	9.83428e-07
ENSG00000149091.11	DGKZ	0.114676	-0.658383	-0.775201	9.87445e-07
ENSG00000144354.9	CDCA7	-0.065221	-0.638733	-0.574451	9.89558e-07
ENSG00000122359.13	ANXA11	0.085108	-0.369756	-0.455554	9.90603e-07
ENSG00000166747.8	AP1G1	-0.0575854	-0.555025	-0.498403	9.91087e-07
ENSG00000167775.6	CD320	0.0254536	-0.74366	-0.771759	9.97291e-07
ENSG00000085449.10	WDFY1	0.130657	-0.42365	-0.55526	1.02937e-06
ENSG00000086504.11	MRPL28	-0.0058003	-0.492704	-0.48761	1.0395e-06
ENSG00000140553.12	UNC45A	0.222623	-0.318822	-0.541686	1.04007e-06
ENSG00000116679.11	IVNS1ABP	-0.029743	-1.08539	-1.06153	1.05291e-06
ENSG00000106628.6	POLD2	-0.0110779	-0.634128	-0.624134	1.0633e-06
ENSG00000196083.5	IL1RAP	0.0132719	-0.422942	-0.436593	1.06845e-06
ENSG00000116539.6	ASH1L	0.0896335	-0.932885	-1.02719	1.08476e-06
ENSG00000130725.3	UBE2M	0.144314	-0.431552	-0.576997	1.1108e-06
ENSG00000155957.12	TMBIM4	0.0077774	-1.14136	-1.15677	1.11117e-06
ENSG00000147274.10	RBMX	-0.100373	-0.72556	-0.626748	1.12133e-06
ENSG00000188641.8	DPYD	0.175881	-0.482016	-0.659202	1.12242e-06
ENSG00000128050.4	PAICS	-0.246457	-0.562714	-0.316639	1.13576e-06
ENSG00000059573.4	ALDH18A1	-0.00274785	-0.393107	-0.39084	1.14911e-06
ENSG00000198824.4	CHAMP1	0.0519081	-0.575744	-0.629038	1.15316e-06
ENSG00000102900.8	NUP93	-0.0939063	-0.498806	-0.405502	1.157e-06
ENSG00000130638.11	ATXN10	0.0886756	-0.363748	-0.452767	1.15845e-06
ENSG00000151726.9	ACSL1	-0.146768	-0.567929	-0.421809	1.17387e-06
ENSG00000134153.5	EMC7	-0.0377819	-0.678072	-0.642184	1.18654e-06
ENSG00000117676.9	RPS6KA1	0.10613	-0.269266	-0.375771	1.23394e-06
ENSG00000115457.5	IGFBP2	-0.510259	-1.12199	-0.614328	1.24672e-06
ENSG00000165283.11	STOML2	-0.00675655	-0.575744	-0.570006	1.2503e-06
ENSG00000080986.8	NDC80	-0.245458	-1.00899	-0.766459	1.26453e-06
ENSG00000125354.18	SEPT6	0.277928	-0.182203	-0.460652	1.27471e-06
ENSG00000100596.2	SPTLC2	-0.0606429	-0.468709	-0.40835	1.28329e-06
ENSG00000197713.10	RPE	0.0231536	-1.31034	-1.3434	1.30185e-06
ENSG00000144381.12	HSPD1	-0.21801	-0.491992	-0.274283	1.30971e-06
ENSG00000119397.12	CNTRL	0.0449017	-0.481968	-0.527714	1.31757e-06
ENSG00000176978.9	DPP7	0.149902	-0.24616	-0.396111	1.32914e-06
ENSG00000095059.11	DHPS	-0.138617	-0.675997	-0.538731	1.3292e-06
ENSG00000160211.11	G6PD	0.346873	-0.0706766	-0.417502	1.33e-06
ENSG00000033867.12	SLC4A7	0.242547	-0.951089	-1.20177	1.34283e-06
ENSG00000163510.9	CWC22	0.0238404	-0.696931	-0.723024	1.35061e-06
ENSG00000137947.7	GTF2B	0.0277287	-0.595609	-0.624365	1.35906e-06
ENSG00000184445.7	KNTC1	-0.154337	-0.752072	-0.599276	1.38081e-06
ENSG00000136381.8	IREB2	0.125926	-0.400316	-0.52672	1.38339e-06
ENSG00000087086.9	FTL	0.18942	-0.62449	-0.816599	1.39799e-06
ENSG00000115970.14	THADA	0.0671575	-0.462972	-0.530953	1.39971e-06
ENSG00000055044.6	NOP58	-0.105366	-0.55334	-0.448805	1.40018e-06
ENSG00000123200.12	ZC3H13	0.0437817	-0.477853	-0.522435	1.42151e-06
ENSG00000108774.10	RAB5C	0.158857	-0.788495	-0.950057	1.42336e-06
ENSG00000125534.5	PPDPF	-0.0345361	-0.715023	-0.682518	1.42461e-06
ENSG00000060982.10	BCAT1	-0.159613	-0.999999	-0.84439	1.47252e-06
ENSG00000084652.11	TXLNA	-0.00056876	-0.464403	-0.464197	1.47252e-06
ENSG00000129933.16	MAU2	0.117361	-0.403355	-0.521709	1.47754e-06
ENSG00000119640.4	ACYP1	-0.145093	-2.078	-1.96692	1.49099e-06
ENSG00000073792.11	IGF2BP2	0.0195769	-0.740613	-0.762588	1.51654e-06
ENSG00000082516.8	GEMIN5	-0.0376189	-0.62293	-0.586825	1.5187e-06
ENSG00000163479.9	SSR2	-0.0451988	-0.37672	-0.331925	1.52524e-06
ENSG00000138768.10	USO1	-0.0109747	-0.570315	-0.560283	1.53012e-06
ENSG00000114737.11	CISH	0.0173292	-0.776103	-0.796187	1.55546e-06
ENSG00000143149.8	ALDH9A1	-0.00634815	-0.532874	-0.527396	1.56198e-06
ENSG00000187109.9	NAP1L1	-0.0765349	-0.483357	-0.407657	1.56761e-06
ENSG00000105851.6	PIK3CG	0.167437	-0.415037	-0.583095	1.57671e-06
ENSG00000018510.8	AGPS	0.0379961	-0.483267	-0.521753	1.60225e-06
ENSG00000107566.9	ERLIN1	-0.0542267	-0.717964	-0.665297	1.62439e-06
ENSG00000197457.5	STMN3	0.0914361	-1.1193	-1.21854	1.65762e-06
ENSG00000141141.10	DDX52	0.0217894	-0.723938	-0.747835	1.76151e-06
ENSG00000153147.5	SMARCA5	0.0589362	-0.331206	-0.390285	1.76591e-06
ENSG00000075539.9	FRYL	0.134664	-0.491388	-0.626924	1.77204e-06
ENSG00000149262.12	INTS4	0.055784	-1.05889	-1.12082	1.77916e-06
ENSG00000108839.7	ALOX12	0.0411608	-1.19264	-1.24267	1.80802e-06
ENSG00000080815.14	PSEN1	0.102583	-0.571416	-0.675861	1.80802e-06
ENSG00000196712.12	NF1	0.109003	-0.534336	-0.644787	1.82291e-06
ENSG00000161533.7	ACOX1	0.260486	-0.36257	-0.623628	1.82291e-06
ENSG00000184207.8	PGP	-0.0827618	-0.935294	-0.85635	1.82357e-06
ENSG00000178950.12	GAK	0.110759	-0.347923	-0.459294	1.82482e-06
ENSG00000137106.13	GRHPR	0.203864	-0.349807	-0.554465	1.84701e-06
ENSG00000156970.8	BUB1B	-0.308544	-0.828519	-0.521522	1.88313e-06
ENSG00000172009.10	THOP1	-0.148105	-0.665581	-0.518641	1.8871e-06
ENSG00000214078.7	CPNE1	0.295686	-0.0783709	-0.374122	1.90607e-06
ENSG00000163131.6	CTSS	0.221722	-0.284525	-0.506442	1.91112e-06
ENSG00000163050.12	ADCK3	0.181217	-0.302927	-0.484556	1.9137e-06
ENSG00000076924.7	XAB2	-0.0628447	-0.456378	-0.393767	1.9137e-06
ENSG00000025796.9	SEC63	-0.0935422	-0.814133	-0.72264	1.91494e-06
ENSG00000048544.5	MRPS10	-0.08834	-1.24793	-1.16846	1.91938e-06
ENSG00000011600.7	TYROBP	0.447232	-0.0164878	-0.464034	1.93414e-06
ENSG00000182325.6	FBXL6	0.232397	-0.600729	-0.834915	1.96866e-06
ENSG00000130254.7	SAFB2	-0.0689866	-0.607417	-0.539802	1.97177e-06
ENSG00000143614.7	GATAD2B	0.0801376	-0.593679	-0.675211	1.99313e-06
ENSG00000142546.9	NOSIP	0.131102	-0.301464	-0.43282	1.99416e-06
ENSG00000105879.7	CBLL1	0.0187209	-0.786293	-0.807485	2.01291e-06
ENSG00000188846.9	RPL14	-0.0246907	-0.377423	-0.352997	2.04216e-06
ENSG00000163811.7	WDR43	0.0874813	-0.373561	-0.461291	2.07116e-06
ENSG00000007923.11	DNAJC11	0.00918122	-0.581342	-0.59204	2.0747e-06
ENSG00000146143.13	PRIM2	-0.0697753	-1.20353	-1.14108	2.08084e-06
ENSG00000168496.3	FEN1	-0.464251	-0.875455	-0.412056	2.08084e-06
ENSG00000138778.7	CENPE	-0.105179	-0.760812	-0.657914	2.08924e-06
ENSG00000073060.11	SCARB1	0.0862803	-0.434403	-0.521509	2.10103e-06
ENSG00000138085.12	ATRAID	0.0461356	-0.592955	-0.640518	2.11444e-06
ENSG00000136731.8	UGGT1	-0.0927806	-0.520504	-0.42829	2.13195e-06
ENSG00000171960.6	PPIH	-0.0418566	-0.720382	-0.680464	2.17096e-06
ENSG00000196975.10	ANXA4	0.428768	-0.295984	-0.725972	2.25087e-06
ENSG00000089327.10	FXYD5	-0.306112	-1.02333	-0.720343	2.25087e-06
ENSG00000117335.14	CD46	0.0895086	-0.519867	-0.610375	2.25087e-06
ENSG00000112029.5	FBXO5	-0.233486	-1.09163	-0.862796	2.28206e-06
ENSG00000140395.4	WDR61	0.0644584	-0.45435	-0.519601	2.28604e-06
ENSG00000138757.10	G3BP2	-0.0849144	-0.440572	-0.356292	2.31216e-06
ENSG00000090060.13	PAPOLA	-0.0833461	-0.678072	-0.596246	2.32062e-06
ENSG00000130382.7	MLLT1	-0.00748205	-0.515357	-0.508466	2.32062e-06
ENSG00000104299.10	INTS9	0.14513	-0.383843	-0.529553	2.33828e-06
ENSG00000116863.10	ADPRHL2	-0.117207	-1.11042	-0.998993	2.34722e-06
ENSG00000084463.3	WBP11	-0.14716	-0.83289	-0.687784	2.35536e-06
ENSG00000173418.7	NAA20	0.0201779	-0.788495	-0.811785	2.36472e-06
ENSG00000147955.12	SIGMAR1	-0.115918	-0.931828	-0.819398	2.38069e-06
ENSG00000058272.11	PPP1R12A	0.0957907	-0.397335	-0.493527	2.42461e-06
ENSG00000108588.9	CCDC47	-0.0465073	-0.477098	-0.430924	2.43298e-06
ENSG00000114302.11	PRKAR2A	0.0367533	-0.95109	-0.99328	2.45134e-06
ENSG00000065911.7	MTHFD2	-0.230477	-0.87092	-0.642626	2.46477e-06
ENSG00000102753.5	KPNA3	-0.0297218	-0.77444	-0.747426	2.47036e-06
ENSG00000140264.15	SERF2	0.0698312	-0.261508	-0.331518	2.48964e-06
ENSG00000130204.8	TOMM40	-0.107053	-0.814785	-0.710467	2.49412e-06
ENSG00000164916.9	FOXK1	-0.0270737	-0.683264	-0.658257	2.50357e-06
ENSG00000100030.10	MAPK1	0.0819271	-0.424071	-0.506422	2.53392e-06
ENSG00000112983.13	BRD8	-0.0247523	-0.688056	-0.665262	2.595e-06
ENSG00000154723.8	ATP5J	0.0515336	-0.509253	-0.561878	2.59999e-06
ENSG00000130741.6	EIF2S3	-0.192322	-0.631669	-0.440331	2.6203e-06
ENSG00000136270.9	TBRG4	0.0353945	-0.450661	-0.486503	2.62829e-06
ENSG00000123064.8	DDX54	0.031017	-0.460071	-0.492074	2.66785e-06
ENSG00000177613.7	CSTF2T	0.017356	-0.503432	-0.521715	2.69542e-06
ENSG00000049860.9	HEXB	0.174103	-0.452068	-0.626939	2.70745e-06
ENSG00000177971.7	IMP3	-0.105365	-0.683327	-0.579228	2.70793e-06
ENSG00000135297.11	MTO1	0.0780407	-0.473171	-0.552049	2.71723e-06
ENSG00000104976.7	SNAPC2	-0.0799311	-1.49032	-1.42384	2.75709e-06
ENSG00000115268.5	RPS15	-0.842744	-1.16467	-0.32254	2.7638e-06
ENSG00000124214.15	STAU1	0.0643979	-0.519867	-0.585435	2.7849e-06
ENSG00000080819.2	CPOX	0.0463013	-0.703018	-0.751818	2.79371e-06
ENSG00000040341.13	STAU2	0.0834596	-0.814967	-0.902717	2.93212e-06
ENSG00000068724.11	TTC7A	0.106357	-0.364007	-0.47085	2.99617e-06
ENSG00000075785.8	RAB7A	0.0521093	-0.309263	-0.361929	3.01221e-06
ENSG00000067167.3	TRAM1	-0.165282	-0.743363	-0.579329	3.10177e-06
ENSG00000138629.11	UBL7	0.219308	-0.437808	-0.65803	3.11315e-06
ENSG00000065183.11	WDR3	-0.00454152	-0.507794	-0.504053	3.12477e-06
ENSG00000138074.10	SLC5A6	-0.145982	-0.813585	-0.67005	3.13463e-06
ENSG00000136824.14	SMC2	-0.310356	-0.754423	-0.444888	3.13591e-06
ENSG00000080371.4	RAB21	-0.0302484	-1.20811	-1.18715	3.22203e-06
ENSG00000141994.11	DUS3L	-0.113533	-0.773229	-0.661668	3.22203e-06
ENSG00000167136.6	ENDOG	0.0167683	-0.758991	-0.778587	3.23736e-06
ENSG00000132153.10	DHX30	-0.0544369	-0.52951	-0.475726	3.23736e-06
ENSG00000112200.12	ZNF451	0.130283	-0.560957	-0.692955	3.2487e-06
ENSG00000108479.7	GALK1	-0.00267798	-0.417584	-0.415545	3.2487e-06
ENSG00000197943.5	PLCG2	0.368273	-0.0664514	-0.435044	3.26169e-06
ENSG00000066084.8	DIP2B	0.0657687	-0.506591	-0.573129	3.28362e-06
ENSG00000152558.10	TMEM123	0.0593342	-0.629816	-0.691384	3.29511e-06
ENSG00000103490.13	PYCARD	0.224527	-0.133076	-0.357583	3.2993e-06
ENSG00000087274.12	ADD1	0.0714385	-0.391111	-0.463411	3.31029e-06
ENSG00000023516.7	AKAP11	0.101868	-0.476438	-0.579255	3.50123e-06
ENSG00000198700.5	IPO9	-0.0932218	-0.647893	-0.555734	3.52141e-06
ENSG00000136940.9	PDCL	-0.0484151	-1.16992	-1.12925	3.5738e-06
ENSG00000136068.10	FLNB	0.364797	2.30827e-07	-0.364531	3.58616e-06
ENSG00000204519.6	ZNF551	0.0648238	-1.03847	-1.10959	3.60599e-06
ENSG00000003756.12	RBM5	0.133379	-0.346973	-0.48089	3.63491e-06
ENSG00000150995.13	ITPR1	0.174205	-0.265838	-0.440591	3.6857e-06
ENSG00000114054.9	PCCB	0.326675	-0.0512685	-0.378107	3.6857e-06
ENSG00000107874.6	CUEDC2	0.153116	-0.652076	-0.8075	3.72791e-06
ENSG00000174004.5	NRROS	-0.122104	-0.55175	-0.430148	3.75517e-06
ENSG00000197961.7	ZNF121	0.192889	-0.725824	-0.922355	3.76415e-06
ENSG00000163382.7	APOA1BP	0.0887062	-0.741687	-0.833506	3.76415e-06
ENSG00000196331.5	HIST1H2BO	-0.36429	-0.652309	-0.288422	3.78137e-06
ENSG00000161267.7	BDH1	-0.0447761	-0.746881	-0.704071	3.84614e-06
ENSG00000060749.10	QSER1	-0.160109	-1.28758	-1.13538	3.86887e-06
ENSG00000167674.10	HDGFRP2	0.0329668	-0.419539	-0.453352	3.90462e-06
ENSG00000133872.9	TMEM66	0.00610446	-0.399217	-0.405866	3.90495e-06
ENSG00000141030.8	COPS3	-0.0991148	-0.573299	-0.475003	3.91551e-06
ENSG00000133316.11	WDR74	-0.00592723	-0.632268	-0.627735	4.04434e-06
ENSG00000108094.10	CUL2	0.00867566	-0.676211	-0.687043	4.06984e-06
ENSG00000149313.6	AASDHPPT	0.0595491	-0.603341	-0.664403	4.0776e-06
ENSG00000165609.8	NUDT5	0.112849	-0.221941	-0.334822	4.07781e-06
ENSG00000136877.10	FPGS	0.115404	-0.38405	-0.500227	4.1511e-06
ENSG00000119977.16	TCTN3	0.0325298	-0.700439	-0.735065	4.15882e-06
ENSG00000117877.6	CD3EAP	-0.0474853	-0.797012	-0.75226	4.16574e-06
ENSG00000136463.7	TACO1	-0.0712051	-1.33342	-1.27351	4.18321e-06
ENSG00000248487.4	ABHD14A	0.0900102	-2.04439	-2.17036	4.20341e-06
ENSG00000103549.17	RNF40	0.0214207	-0.474818	-0.496823	4.32597e-06
ENSG00000213983.7	AP1G2	0.324905	-0.611929	-0.939523	4.32863e-06
ENSG00000186416.8	NKRF	-0.0070894	-0.751501	-0.747402	4.37591e-06
ENSG00000135905.14	DOCK10	0.0288296	-0.467779	-0.497482	4.38628e-06
ENSG00000108639.3	SYNGR2	0.0268256	-0.688056	-0.716828	4.40685e-06
ENSG00000115548.12	KDM3A	0.111201	-0.364764	-0.476393	4.47933e-06
ENSG00000211456.6	SACM1L	0.190734	-0.370715	-0.561872	4.72796e-06
ENSG00000156304.10	SCAF4	-0.038413	-0.521285	-0.483671	4.72796e-06
ENSG00000134851.8	TMEM165	0.157032	-0.726434	-0.886612	4.73275e-06
ENSG00000031698.8	SARS	0.131956	-0.307258	-0.439699	4.73338e-06
ENSG00000198356.7	ASNA1	-0.010738	-0.497801	-0.487925	4.74055e-06
ENSG00000100578.10	KIAA0586	0.0359172	-0.589212	-0.626856	4.75545e-06
ENSG00000184470.15	TXNRD2	0.216343	-0.525091	-0.743652	4.82841e-06
ENSG00000132142.15	ACACA	-0.0817457	-0.493893	-0.412704	4.82841e-06
ENSG00000239306.4	RBM14	-0.177556	-0.543142	-0.36597	4.88062e-06
ENSG00000185862.5	EVI2B	0.158327	-0.295007	-0.454037	4.9956e-06
ENSG00000116957.8	TBCE	0.0195915	-0.949959	-0.974238	5.09415e-06
ENSG00000167470.8	MIDN	0.0796976	-0.489805	-0.570749	5.13403e-06
ENSG00000115233.7	PSMD14	-0.0142555	-0.515357	-0.501935	5.13403e-06
ENSG00000129315.5	CCNT1	-0.0274555	-0.804275	-0.780265	5.22005e-06
ENSG00000196743.4	GM2A	0.390982	-0.132307	-0.523668	5.25124e-06
ENSG00000139613.7	SMARCC2	0.0286042	-0.398549	-0.427971	5.36421e-06
ENSG00000196226.2	HIST1H2BB	-0.314478	-0.653371	-0.339568	5.411e-06
ENSG00000139842.10	CUL4A	0.0143746	-0.560539	-0.576038	5.42548e-06
ENSG00000111843.9	TMEM14C	0.143996	-0.629162	-0.775089	5.43498e-06
ENSG00000173821.15	RNF213	0.240428	-0.281514	-0.522347	5.64137e-06
ENSG00000140750.12	ARHGAP17	0.0878027	-0.384962	-0.473206	5.67538e-06
ENSG00000150977.9	RILPL2	-0.03217	-0.816037	-0.786702	5.689e-06
ENSG00000131116.7	ZNF428	0.225911	-0.783188	-1.01324	5.69171e-06
ENSG00000142669.9	SH3BGRL3	0.253112	-0.0789881	-0.33208	5.70894e-06
ENSG00000177830.13	CHID1	0.00181378	-0.573907	-0.576986	5.72859e-06
ENSG00000111237.14	VPS29	-0.0496617	-0.644772	-0.596845	5.74752e-06
ENSG00000198301.7	SDAD1	0.103094	-0.615082	-0.720189	5.74907e-06
ENSG00000090316.11	MAEA	0.00796957	-0.49114	-0.499832	5.92788e-06
ENSG00000138279.11	ANXA7	0.0128027	-0.525558	-0.539423	5.9516e-06
ENSG00000179041.2	RRS1	-0.228664	-0.738734	-0.511359	5.96688e-06
ENSG00000108294.4	PSMB3	0.0729445	-0.193631	-0.266681	6.01003e-06
ENSG00000163389.6	POGLUT1	0.148109	-0.975752	-1.13071	6.06386e-06
ENSG00000025708.8	TYMP	0.653354	0.200299	-0.45305	6.07597e-06
ENSG00000141968.3	VAV1	0.234838	-0.155014	-0.390211	6.10088e-06
ENSG00000117868.11	ESYT2	-0.0744058	-0.392768	-0.318521	6.10088e-06
ENSG00000166986.8	MARS	-0.180954	-0.526173	-0.34587	6.19304e-06
ENSG00000105677.7	TMEM147	-0.120222	-1.1481	-1.03536	6.22997e-06
ENSG00000198366.5	HIST1H3A	-0.399193	-0.814667	-0.417128	6.22997e-06
ENSG00000011485.10	PPP5C	-0.0990024	-0.579837	-0.481545	6.24246e-06
ENSG00000167863.7	ATP5H	0.0917217	-0.424966	-0.51742	6.28972e-06
ENSG00000197386.6	HTT	0.178259	-0.342392	-0.521284	6.39567e-06
ENSG00000117054.9	ACADM	0.0789269	-0.446886	-0.526414	6.4185e-06
ENSG00000168883.15	USP39	-0.0946497	-0.645504	-0.552101	6.4208e-06
ENSG00000044115.16	CTNNA1	-0.0456335	-0.384962	-0.33986	6.4393e-06
ENSG00000099875.10	MKNK2	0.102679	-0.791413	-0.897778	6.48793e-06
ENSG00000167670.11	CHAF1A	-0.326473	-0.851242	-0.526335	6.49832e-06
ENSG00000177556.7	ATOX1	0.0384021	-0.931287	-0.974248	6.51071e-06
ENSG00000135763.5	URB2	-0.0718049	-0.774707	-0.70518	6.61099e-06
ENSG00000170581.9	STAT2	0.353187	-0.136265	-0.489889	6.66595e-06
ENSG00000136875.8	PRPF4	-0.0940362	-0.756443	-0.664409	6.73554e-06
ENSG00000196290.10	NIF3L1	-0.160212	-0.975752	-0.819785	6.75115e-06
ENSG00000116455.9	WDR77	-0.00310054	-0.694191	-0.693185	6.8005e-06
ENSG00000060237.12	WNK1	-0.0682896	-0.523851	-0.456029	6.97002e-06
ENSG00000105514.3	RAB3D	0.0462369	-0.594007	-0.641676	6.98431e-06
ENSG00000114354.8	TFG	-0.102862	-0.676651	-0.575213	6.98431e-06
ENSG00000163636.6	PSMD6	-0.075154	-0.527629	-0.453376	6.9864e-06
ENSG00000060339.9	CCAR1	0.067964	-0.339403	-0.407718	6.99395e-06
ENSG00000166851.10	PLK1	-0.312514	-0.67752	-0.36593	7.03704e-06
ENSG00000088832.10	FKBP1A	0.1242	-0.881355	-1.01088	7.03742e-06
ENSG00000167657.7	DAPK3	0.117009	-0.596103	-0.715451	7.10734e-06
ENSG00000213339.4	QTRT1	0.0462047	-0.468618	-0.51575	7.10734e-06
ENSG00000133313.10	CNDP2	0.251565	-0.0866839	-0.338304	7.28208e-06
ENSG00000198171.8	DDRGK1	0.0785609	-0.600392	-0.680498	7.32229e-06
ENSG00000173145.7	NOC3L	0.11345	-0.522421	-0.63752	7.42833e-06
ENSG00000113273.11	ARSB	0.0399117	-0.736965	-0.779272	7.47212e-06
ENSG00000067955.9	CBFB	-0.0430833	-0.698173	-0.657361	7.51554e-06
ENSG00000102316.12	MAGED2	0.0116878	-0.617752	-0.631116	7.63889e-06
ENSG00000074356.12	C17orf85	-0.101966	-0.882642	-0.784107	7.6923e-06
ENSG00000257923.5	CUX1	0.247212	-0.611929	-0.862246	7.76574e-06
ENSG00000198677.6	TTC37	0.220689	-0.358047	-0.579831	7.77177e-06
ENSG00000109519.8	GRPEL1	0.055428	-0.408084	-0.464173	7.77302e-06
ENSG00000164096.10	C4orf3	0.0290478	-0.501477	-0.531913	7.85207e-06
ENSG00000138073.9	PREB	-0.0315121	-0.435871	-0.404827	7.89487e-06
ENSG00000120948.11	TARDBP	-0.166349	-0.695419	-0.530304	8.02849e-06
ENSG00000178927.12	C17orf62	0.121854	-0.38037	-0.502672	8.07696e-06
ENSG00000001036.9	FUCA2	-0.0592891	-0.629888	-0.572016	8.08933e-06
ENSG00000133835.10	HSD17B4	-0.0280331	-0.455798	-0.428617	8.20801e-06
ENSG00000165025.10	SYK	0.0716271	-0.363255	-0.435159	8.25172e-06
ENSG00000101856.8	PGRMC1	-0.130823	-0.986824	-0.860243	8.27611e-06
ENSG00000100226.11	GTPBP1	-0.0503767	-0.775959	-0.72878	8.31597e-06
ENSG00000140262.13	TCF12	-0.146052	-1.01306	-0.871581	8.41185e-06
ENSG00000137409.14	MTCH1	0.130407	-0.590609	-0.723369	8.44659e-06
ENSG00000187796.9	CARD9	0.235024	-0.347165	-0.583129	8.53451e-06
ENSG00000172893.11	DHCR7	0.0199636	-0.316332	-0.336689	8.57024e-06
ENSG00000134697.8	GNL2	-0.0381128	-0.445734	-0.408317	8.5723e-06
ENSG00000124126.9	PREX1	0.305323	-0.149576	-0.455374	8.57234e-06
ENSG00000068903.15	SIRT2	0.141085	-0.54432	-0.68691	8.57735e-06
ENSG00000100949.10	RABGGTA	0.124333	-0.532668	-0.658866	8.61101e-06
ENSG00000168092.9	PAFAH1B2	-0.0438636	-0.706268	-0.664365	8.62388e-06
ENSG00000198408.9	MGEA5	0.123735	-0.407806	-0.532323	8.73697e-06
ENSG00000136630.11	HLX	-0.038446	-0.690516	-0.653629	8.82032e-06
ENSG00000136960.8	ENPP2	0.419312	-0.0331666	-0.452725	8.89706e-06
ENSG00000198728.6	LDB1	0.139084	-0.620411	-0.762038	9.18484e-06
ENSG00000141480.13	ARRB2	0.0906128	-0.705552	-0.799545	9.19859e-06
ENSG00000175606.6	TMEM70	-0.0625378	-0.683026	-0.622452	9.19859e-06
ENSG00000143379.8	SETDB1	0.100348	-0.406909	-0.50822	9.30649e-06
ENSG00000112531.12	QKI	0.157339	-0.341468	-0.499524	9.35376e-06
ENSG00000164818.11	HEATR2	-0.0447091	-0.52522	-0.481713	9.44659e-06
ENSG00000142634.8	EFHD2	-0.0105627	-0.631355	-0.622376	9.5353e-06
ENSG00000124702.13	KLHDC3	-0.0335098	-0.787455	-0.756748	9.55121e-06
ENSG00000123609.6	NMI	0.00818942	-0.489924	-0.498861	9.55256e-06
ENSG00000078808.12	SDF4	0.0725525	-0.425133	-0.498422	9.86239e-06
ENSG00000205302.2	SNX2	0.0769034	-0.341616	-0.418975	1.00057e-05
ENSG00000105402.3	NAPA	0.0905217	-0.30889	-0.399596	1.0096e-05
ENSG00000132300.14	PTCD3	0.0727899	-0.415037	-0.488582	1.01444e-05
ENSG00000087263.12	OGFOD1	-0.0744149	-0.746881	-0.674507	1.03589e-05
ENSG00000148296.5	SURF6	0.297266	-0.720845	-1.02164	1.03608e-05
ENSG00000120159.7	CAAP1	0.0392145	-1.21412	-1.26307	1.04388e-05
ENSG00000143933.12	CALM2	0.121517	-0.204233	-0.326117	1.06479e-05
ENSG00000100034.9	PPM1F	0.109584	-1.078	-1.19638	1.06557e-05
ENSG00000198558.2	HIST1H4L	-0.459661	-0.733826	-0.274741	1.07014e-05
ENSG00000198042.6	MAK16	-0.0876339	-0.787591	-0.702157	1.07242e-05
ENSG00000108055.9	SMC3	-0.159808	-0.581171	-0.422091	1.07773e-05
ENSG00000123144.6	C19orf43	-0.164148	-0.648388	-0.485387	1.08193e-05
ENSG00000117899.6	MESDC2	-0.0875576	-0.999999	-0.917369	1.08653e-05
ENSG00000100603.9	SNW1	-0.0729149	-0.520436	-0.448148	1.08653e-05
ENSG00000198431.11	TXNRD1	-0.0815822	-0.527385	-0.44662	1.08653e-05
ENSG00000159322.13	ADPGK	0.104145	-0.384664	-0.489843	1.09212e-05
ENSG00000179918.15	SEPHS2	-0.00404448	-0.454378	-0.450923	1.09226e-05
ENSG00000146094.9	DOK3	0.226386	-0.296774	-0.523605	1.09709e-05
ENSG00000196747.3	HIST1H2AI	-0.278458	-0.938599	-0.66253	1.10542e-05
ENSG00000167005.9	NUDT21	-0.0912441	-0.638204	-0.548227	1.10542e-05
ENSG00000196531.6	NACA	-0.414398	-0.739937	-0.326095	1.10959e-05
ENSG00000065135.7	GNAI3	-0.0784249	-0.521459	-0.443924	1.12106e-05
ENSG00000083444.12	PLOD1	0.0887766	-0.338934	-0.42838	1.14344e-05
ENSG00000101210.6	EEF1A2	-0.242995	-0.629205	-0.386748	1.14505e-05
ENSG00000100519.7	PSMC6	0.0103782	-0.602664	-0.614662	1.16067e-05
ENSG00000185432.10	METTL7A	0.870133	0.171767	-0.697269	1.16332e-05
ENSG00000137845.10	ADAM10	0.118115	-0.254695	-0.37291	1.16341e-05
ENSG00000092108.16	SCFD1	0.130534	-0.604071	-0.737221	1.17697e-05
ENSG00000107290.9	SETX	0.131091	-0.379848	-0.512039	1.17697e-05
ENSG00000177764.6	ZCCHC3	-0.0565835	-0.878693	-0.825514	1.18012e-05
ENSG00000142945.8	KIF2C	-0.329313	-0.734761	-0.406436	1.18331e-05
ENSG00000103066.8	PLA2G15	0.243196	-0.700439	-0.946852	1.18366e-05
ENSG00000128815.13	WDFY4	0.199432	-0.224873	-0.424756	1.18366e-05
ENSG00000165416.10	SUGT1	-0.0827238	-0.89503	-0.816168	1.18903e-05
ENSG00000119723.11	COQ6	0.0795674	-1.152	-1.24002	1.18938e-05
ENSG00000138107.7	ACTR1A	-0.00666713	-0.564784	-0.559105	1.19474e-05
ENSG00000112339.10	HBS1L	0.0305122	-0.619969	-0.652312	1.23912e-05
ENSG00000174718.7	KIAA1551	0.137513	-0.436099	-0.574462	1.24975e-05
ENSG00000145216.11	FIP1L1	-0.018436	-0.617202	-0.600565	1.28474e-05
ENSG00000138594.8	TMOD3	-0.140326	-0.76471	-0.626761	1.28875e-05
ENSG00000187522.9	HSPA14	-0.130606	-0.800391	-0.671976	1.29866e-05
ENSG00000099804.4	CDC34	-0.052719	-1.05733	-1.0106	1.30977e-05
ENSG00000131263.8	RLIM	0.00700161	-0.621488	-0.630365	1.31047e-05
ENSG00000163823.3	CCR1	0.122333	-0.320598	-0.443128	1.31069e-05
ENSG00000107745.12	MICU1	0.0332625	-0.671767	-0.707532	1.31572e-05
ENSG00000059588.5	TARBP1	0.246274	-0.293731	-0.540672	1.32313e-05
ENSG00000171155.7	C1GALT1C1	0.0421786	-0.619969	-0.663587	1.32851e-05
ENSG00000061794.8	MRPS35	-0.0126621	-0.620152	-0.609431	1.35333e-05
ENSG00000165219.17	GAPVD1	-0.0190484	-0.467566	-0.449507	1.35378e-05
ENSG00000187840.4	EIF4EBP1	-0.189591	-0.799406	-0.612011	1.35714e-05
ENSG00000105875.9	WDR91	0.127819	-0.646363	-0.777104	1.36054e-05
ENSG00000120725.8	SIL1	0.072589	-0.732519	-0.808558	1.36549e-05
ENSG00000117525.9	F3	0.101891	-1.23266	-1.34788	1.3776e-05
ENSG00000179387.5	ELMOD2	0.127705	-0.999999	-1.13652	1.38089e-05
ENSG00000163939.14	PBRM1	0.0409997	-0.45785	-0.499527	1.38089e-05
ENSG00000198000.7	NOL8	0.0588272	-0.611146	-0.67199	1.39036e-05
ENSG00000076242.10	MLH1	-0.271538	-0.797639	-0.527384	1.39411e-05
ENSG00000183765.16	CHEK2	-0.03778	-0.835613	-0.800713	1.39607e-05
ENSG00000066455.8	GOLGA5	-0.0821711	-1.47999	-1.41199	1.40985e-05
ENSG00000052749.9	RRP12	-0.0143078	-0.450815	-0.437087	1.41623e-05
ENSG00000173638.14	SLC19A1	-0.0439496	-0.556393	-0.513646	1.45775e-05
ENSG00000114316.8	USP4	0.113192	-0.364274	-0.478085	1.45775e-05
ENSG00000152457.13	DCLRE1C	0.129956	-1.05445	-1.1941	1.46192e-05
ENSG00000077420.11	APBB1IP	0.17584	-0.314586	-0.490725	1.46192e-05
ENSG00000100365.10	NCF4	0.299542	-0.111217	-0.410749	1.46573e-05
ENSG00000171861.6	RNMTL1	-0.0346945	-0.733485	-0.701199	1.48826e-05
ENSG00000105483.12	CARD8	0.118922	-0.499232	-0.619638	1.49659e-05
ENSG00000008988.5	RPS20	0.0768318	-0.523562	-0.602011	1.515e-05
ENSG00000164111.10	ANXA5	0.0279528	-0.473601	-0.50213	1.55927e-05
ENSG00000144485.6	HES6	0.148486	-1.11548	-1.27383	1.56797e-05
ENSG00000160877.5	NACC1	-0.114196	-0.999999	-0.890239	1.5814e-05
ENSG00000086827.4	ZW10	-0.140505	-0.905535	-0.768553	1.5814e-05
ENSG00000174903.10	RAB1B	-0.0968642	-0.646984	-0.551818	1.5814e-05
ENSG00000075426.7	FOSL2	0.0465371	-0.534061	-0.581649	1.58472e-05
ENSG00000162704.11	ARPC5	0.162736	-0.189105	-0.352111	1.58472e-05
ENSG00000137563.7	GGH	-0.356925	-0.9855	-0.631109	1.59471e-05
ENSG00000116691.6	MIIP	0.101294	-0.775293	-0.880319	1.59741e-05
ENSG00000115365.7	LANCL1	0.0259592	-0.732716	-0.761439	1.59741e-05
ENSG00000114450.5	GNB4	-0.0823247	-0.999999	-0.92252	1.60491e-05
ENSG00000115286.15	NDUFS7	0.00817896	-0.339801	-0.348448	1.62992e-05
ENSG00000196535.10	MYO18A	0.26342	-0.287802	-0.55213	1.648e-05
ENSG00000064490.9	RFXANK	0.139534	-0.412548	-0.552779	1.65431e-05
ENSG00000069248.9	NUP133	-0.0393633	-0.456176	-0.417689	1.65803e-05
ENSG00000168476.7	REEP4	-0.0656346	-0.563901	-0.499484	1.6793e-05
ENSG00000103245.9	NARFL	-0.130322	-1.29956	-1.18077	1.68386e-05
ENSG00000124422.7	USP22	-0.117405	-0.484056	-0.366986	1.68386e-05
ENSG00000138190.12	EXOC6	0.142722	-0.725824	-0.872643	1.70084e-05
ENSG00000107798.13	LIPA	0.264948	-0.124755	-0.389714	1.75008e-05
ENSG00000110075.10	PPP6R3	0.0274998	-0.408373	-0.436396	1.76803e-05
ENSG00000148229.8	POLE3	-0.145311	-0.999999	-0.859035	1.77192e-05
ENSG00000188816.3	HMX2	0.193494	-0.427748	-0.622511	1.7754e-05
ENSG00000100109.12	TFIP11	0.0289209	-0.546894	-0.577023	1.77623e-05
ENSG00000103657.9	HERC1	0.237514	-0.17603	-0.413715	1.77894e-05
ENSG00000111897.6	SERINC1	0.0972268	-0.284799	-0.38229	1.7845e-05
ENSG00000136709.7	WDR33	0.0352007	-0.420181	-0.455796	1.79377e-05
ENSG00000109133.8	TMEM33	0.0464142	-0.561878	-0.609937	1.80568e-05
ENSG00000069998.8	CECR5	-0.0468481	-0.636563	-0.591298	1.81904e-05
ENSG00000114491.9	UMPS	-0.144723	-0.653675	-0.509932	1.82816e-05
ENSG00000104064.12	GABPB1	-0.00971786	-0.883186	-0.87822	1.83355e-05
ENSG00000131462.3	TUBG1	-0.302077	-1.1635	-0.86609	1.85915e-05
ENSG00000137804.8	NUSAP1	-0.340011	-0.692314	-0.352752	1.85976e-05
ENSG00000244462.3	RBM12	-0.0715718	-0.429481	-0.35848	1.86787e-05
ENSG00000080503.15	SMARCA2	0.0311728	-0.405514	-0.4371	1.87994e-05
ENSG00000188636.3	LDOC1L	0.00860174	-2.09953	-2.14864	1.8831e-05
ENSG00000109107.9	ALDOC	0.212572	-0.208901	-0.421653	1.8955e-05
ENSG00000171298.8	GAA	0.515931	0.0147218	-0.501301	1.90177e-05
ENSG00000126226.17	PCID2	0.0125926	-0.628905	-0.643307	1.92917e-05
ENSG00000119844.10	AFTPH	0.0555477	-0.781819	-0.841064	1.93405e-05
ENSG00000099219.9	ERMP1	0.0975886	-0.373975	-0.472471	1.95052e-05
ENSG00000112159.7	MDN1	0.0514805	-0.312939	-0.364817	1.95052e-05
ENSG00000139372.10	TDG	-0.040847	-0.78958	-0.752199	1.95218e-05
ENSG00000196365.7	LONP1	-0.102582	-0.376563	-0.274282	1.97095e-05
ENSG00000132432.9	SEC61G	-0.0469129	-0.685489	-0.640201	2.00217e-05
ENSG00000088812.13	ATRN	0.230232	-0.0519276	-0.282088	2.00217e-05
ENSG00000131374.10	TBC1D5	0.149804	-0.40439	-0.555297	2.00723e-05
ENSG00000140718.14	FTO	0.0246382	-0.666756	-0.693207	2.02226e-05
ENSG00000108064.6	TFAM	-0.170936	-0.927243	-0.759768	2.03947e-05
ENSG00000163956.6	LRPAP1	0.153768	-0.137503	-0.291549	2.04325e-05
ENSG00000225921.2	NOL7	-0.123545	-0.739472	-0.617713	2.06676e-05
ENSG00000122958.10	VPS26A	-0.0731288	-0.60514	-0.533528	2.06676e-05
ENSG00000175550.3	DRAP1	-0.0199219	-0.900464	-0.885592	2.08304e-05
ENSG00000181929.7	PRKAG1	-0.0523703	-0.66025	-0.609856	2.08504e-05
ENSG00000163453.7	IGFBP7	0.397144	-0.253756	-0.65163	2.09225e-05
ENSG00000163541.7	SUCLG1	0.0390488	-0.436099	-0.475971	2.09246e-05
ENSG00000060971.13	ACAA1	0.234465	-0.430144	-0.665799	2.12574e-05
ENSG00000113558.14	SKP1	0.0542129	-0.468387	-0.523618	2.12574e-05
ENSG00000099899.10	TRMT2A	-0.0158232	-0.635427	-0.621464	2.1712e-05
ENSG00000103266.6	STUB1	-0.0132407	-0.772048	-0.761987	2.17322e-05
ENSG00000136718.5	IMP4	-0.0409953	-0.541146	-0.501221	2.18549e-05
ENSG00000185359.8	HGS	0.0329693	-0.422127	-0.455909	2.18793e-05
ENSG00000185728.12	YTHDF3	0.0568843	-0.392317	-0.449554	2.20007e-05
ENSG00000147889.12	CDKN2A	-0.0434275	-0.650925	-0.609432	2.20485e-05
ENSG00000181026.13	AEN	0.289489	-0.410464	-0.701377	2.20995e-05
ENSG00000146386.7	ABRACL	0.0374747	-0.641105	-0.680472	2.23242e-05
ENSG00000114767.6	RRP9	0.0571716	-0.485426	-0.543876	2.23596e-05
ENSG00000159216.14	RUNX1	-0.0259321	-0.441567	-0.416441	2.24236e-05
ENSG00000120727.8	PAIP2	0.0587674	-0.621488	-0.682526	2.27898e-05
ENSG00000099624.3	ATP5D	-0.00624081	-0.304854	-0.298845	2.28857e-05
ENSG00000156990.10	RPUSD3	0.0386616	-0.584962	-0.625058	2.29189e-05
ENSG00000159692.11	CTBP1	0.0835822	-0.568283	-0.654135	2.29276e-05
ENSG00000125656.4	CLPP	-0.0485279	-0.463797	-0.415833	2.29939e-05
ENSG00000070061.10	IKBKAP	0.0692042	-0.501821	-0.572427	2.31871e-05
ENSG00000198604.6	BAZ1A	0.0409444	-0.330362	-0.371732	2.3203e-05
ENSG00000147475.10	ERLIN2	0.107766	-0.366943	-0.475291	2.34046e-05
ENSG00000087269.11	NOP14	-0.0827947	-0.510738	-0.42863	2.3911e-05
ENSG00000168242.3	HIST1H2BI	-0.423505	-0.696371	-0.273162	2.39218e-05
ENSG00000155463.8	OXA1L	-0.0541295	-0.390051	-0.33617	2.39316e-05
ENSG00000075218.14	GTSE1	-0.299624	-1.03103	-0.734997	2.41028e-05
ENSG00000025156.8	HSF2	-0.00268403	-1.62149	-1.64077	2.45225e-05
ENSG00000124562.5	SNRPC	-0.0938144	-0.569195	-0.476636	2.48083e-05
ENSG00000105229.2	PIAS4	0.0167774	-0.589288	-0.60731	2.483e-05
ENSG00000167548.10	KMT2D	-0.0553592	-0.549338	-0.494735	2.49266e-05
ENSG00000160294.6	MCM3AP	0.079449	-0.428334	-0.508464	2.49571e-05
ENSG00000153395.5	LPCAT1	0.0224797	-0.356792	-0.379986	2.5388e-05
ENSG00000205220.7	PSMB10	0.21655	-0.0637522	-0.280461	2.55886e-05
ENSG00000122257.14	RBBP6	0.0244126	-0.614108	-0.639973	2.56807e-05
ENSG00000163950.8	SLBP	-0.181435	-0.579249	-0.398604	2.57379e-05
ENSG00000120254.11	MTHFD1L	-0.028597	-0.530514	-0.502866	2.59322e-05
ENSG00000196576.10	PLXNB2	0.331521	0.0718329	-0.259533	2.59595e-05
ENSG00000198951.7	NAGA	0.0614398	-0.366128	-0.428	2.60568e-05
ENSG00000120008.11	WDR11	0.252565	-0.352516	-0.606067	2.64002e-05
ENSG00000101457.8	DNTTIP1	0.0356239	-0.55141	-0.588759	2.68649e-05
ENSG00000109920.8	FNBP4	-0.0360124	-0.810522	-0.777304	2.68964e-05
ENSG00000064933.12	PMS1	-0.00932778	-1.0199	-1.01758	2.68988e-05
ENSG00000125652.3	ALKBH7	0.0615037	-0.463711	-0.526065	2.72202e-05
ENSG00000130193.7	THEM6	-0.00413971	-0.874468	-0.875505	2.74901e-05
ENSG00000140391.10	TSPAN3	-0.0895362	-0.999999	-0.915643	2.75466e-05
ENSG00000074071.9	MRPS34	-0.015013	-0.43272	-0.418335	2.79417e-05
ENSG00000170266.11	GLB1	0.190411	-0.289506	-0.480334	2.79883e-05
ENSG00000171763.13	SPATA5L1	-0.0648038	-0.908851	-0.848936	2.80243e-05
ENSG00000100726.10	TELO2	-0.129515	-0.601082	-0.472472	2.80986e-05
ENSG00000100225.13	FBXO7	-0.00964925	-0.53211	-0.523553	2.84441e-05
ENSG00000168078.5	PBK	-0.237734	-0.902303	-0.667569	2.86277e-05
ENSG00000064545.10	TMEM161A	0.105905	-0.307025	-0.41313	2.89927e-05
ENSG00000167202.7	TBC1D2B	0.0097453	-0.828233	-0.841764	2.90691e-05
ENSG00000009844.11	VTA1	0.016214	-0.552541	-0.570284	2.91246e-05
ENSG00000132591.7	ERAL1	-0.0348893	-0.621488	-0.588675	2.92739e-05
ENSG00000096401.7	CDC5L	0.0372611	-0.398772	-0.436449	2.92919e-05
ENSG00000086589.7	RBM22	0.100712	-0.386549	-0.487667	2.95877e-05
ENSG00000171522.5	PTGER4	0.046863	-0.714245	-0.76369	2.96267e-05
ENSG00000143851.11	PTPN7	-0.0866866	-0.559427	-0.473639	2.96372e-05
ENSG00000011258.11	MBTD1	0.177141	-0.74366	-0.925888	2.96465e-05
ENSG00000197714.4	ZNF460	-0.00846969	-0.515497	-0.507889	2.96465e-05
ENSG00000175662.13	TOM1L2	0.234386	-1.34395	-1.59695	2.96932e-05
ENSG00000168297.11	PXK	-0.0544246	-0.611228	-0.558504	2.9902e-05
ENSG00000087502.13	ERGIC2	-0.0341447	-0.921144	-0.89187	3.00219e-05
ENSG00000177565.11	TBL1XR1	0.103159	-0.464841	-0.569451	3.00683e-05
ENSG00000177105.9	RHOG	0.126143	-0.392317	-0.519663	3.00683e-05
ENSG00000143183.12	TMCO1	0.0203253	-0.447981	-0.469152	3.00683e-05
ENSG00000157456.3	CCNB2	-0.337609	-0.775718	-0.439207	3.01956e-05
ENSG00000041802.6	LSG1	-0.107831	-0.780687	-0.675131	3.01958e-05
ENSG00000099331.9	MYO9B	0.208691	-0.36804	-0.577573	3.02378e-05
ENSG00000160949.12	TONSL	-0.133894	-0.55613	-0.423203	3.02557e-05
ENSG00000138028.10	CGREF1	0.072298	-1.16992	-1.25528	3.03283e-05
ENSG00000163171.6	CDC42EP3	-0.404027	-1.41504	-1.02076	3.03756e-05
ENSG00000176595.3	KBTBD11	0.0605642	-0.556948	-0.618841	3.05482e-05
ENSG00000130332.10	LSM7	0.0429132	-0.256548	-0.299877	3.08048e-05
ENSG00000167881.10	SRP68	0.0110603	-0.423681	-0.435229	3.1316e-05
ENSG00000130749.5	ZC3H4	-0.141051	-0.580096	-0.440213	3.14602e-05
ENSG00000116750.9	UCHL5	-0.0713321	-0.588573	-0.518844	3.14707e-05
ENSG00000102763.11	VWA8	0.196257	-0.495325	-0.692955	3.1629e-05
ENSG00000171766.11	GATM	-0.0567071	-0.922832	-0.871061	3.17482e-05
ENSG00000069345.7	DNAJA2	0.0327976	-0.371969	-0.405213	3.18051e-05
ENSG00000005007.8	UPF1	0.0745443	-0.221577	-0.296245	3.18849e-05
ENSG00000132485.8	ZRANB2	0.0269756	-0.404695	-0.432252	3.19703e-05
ENSG00000126254.7	RBM42	-0.167744	-0.508213	-0.340773	3.19703e-05
ENSG00000140320.7	BAHD1	-0.0183936	-0.669851	-0.65325	3.20253e-05
ENSG00000135317.8	SNX14	0.159448	-0.405992	-0.566399	3.20569e-05
ENSG00000099968.13	BCL2L13	0.0901652	-0.607682	-0.700061	3.23532e-05
ENSG00000103275.14	UBE2I	-0.00332687	-0.433458	-0.430594	3.23532e-05
ENSG00000166130.10	IKBIP	-0.126875	-0.938599	-0.816272	3.23849e-05
ENSG00000166411.9	IDH3A	-0.0219592	-0.629816	-0.609565	3.25122e-05
ENSG00000182095.10	TNRC18	-0.0982541	-0.662965	-0.565897	3.26202e-05
ENSG00000161513.7	FDXR	0.878671	0.342687	-0.535401	3.34474e-05
ENSG00000198755.6	RPL10A	-0.485351	-0.816894	-0.332557	3.34821e-05
ENSG00000132424.10	PNISR	0.217689	-0.342887	-0.561146	3.36502e-05
ENSG00000012660.9	ELOVL5	-0.183765	-0.675801	-0.493252	3.36502e-05
ENSG00000143756.7	FBXO28	0.0968259	-0.95109	-1.05558	3.37431e-05
ENSG00000091009.6	RBM27	-0.0627179	-0.614709	-0.553792	3.37431e-05
ENSG00000148841.11	ITPRIP	-0.1653	-1.4245	-1.27273	3.40008e-05
ENSG00000144218.14	AFF3	0.136226	-0.298341	-0.43502	3.40013e-05
ENSG00000177084.12	POLE	-0.227254	-0.710493	-0.484583	3.40316e-05
ENSG00000170515.9	PA2G4	-0.157273	-0.642017	-0.48603	3.42341e-05
ENSG00000147813.11	NAPRT1	0.211198	-0.15953	-0.370813	3.42985e-05
ENSG00000143106.8	PSMA5	-0.033326	-0.389832	-0.356763	3.43385e-05
ENSG00000162769.8	FLVCR1	0.0419403	-1.44057	-1.50258	3.45498e-05
ENSG00000108559.7	NUP88	-0.0659619	-0.522901	-0.457959	3.46389e-05
ENSG00000102034.12	ELF4	0.0348948	-0.63005	-0.666711	3.5032e-05
ENSG00000076108.7	BAZ2A	0.0465062	-0.424966	-0.472465	3.52171e-05
ENSG00000109046.10	WSB1	-0.0754459	-0.557826	-0.483184	3.5268e-05
ENSG00000096080.7	MRPS18A	-0.114763	-0.93029	-0.819937	3.52864e-05
ENSG00000187688.10	TRPV2	0.137363	-0.294743	-0.432545	3.53218e-05
ENSG00000182220.9	ATP6AP2	0.158175	-0.262036	-0.420855	3.53218e-05
ENSG00000103253.13	HAGHL	0.272478	-0.752072	-1.0295	3.53567e-05
ENSG00000131069.15	ACSS2	0.110367	-0.392317	-0.503256	3.54321e-05
ENSG00000101191.12	DIDO1	-0.0521631	-0.430634	-0.379073	3.54321e-05
ENSG00000085832.12	EPS15	0.057356	-0.819427	-0.881561	3.54482e-05
ENSG00000144744.12	UBA3	0.10255	-0.430634	-0.534416	3.54976e-05
ENSG00000116044.11	NFE2L2	0.0332568	-0.41889	-0.452701	3.56671e-05
ENSG00000103510.15	KAT8	0.0533602	-0.675377	-0.731368	3.60147e-05
ENSG00000000419.8	DPM1	-0.0111096	-0.513623	-0.503409	3.62052e-05
ENSG00000154174.7	TOMM70A	-0.0574294	-0.50696	-0.450636	3.63137e-05
ENSG00000159842.10	ABR	0.0719908	-0.306103	-0.378233	3.63531e-05
ENSG00000075945.8	KIFAP3	0.132083	-0.925999	-1.06494	3.63704e-05
ENSG00000138002.10	IFT172	0.112425	-0.758991	-0.875265	3.64475e-05
ENSG00000156599.6	ZDHHC5	0.0808412	-0.672425	-0.755689	3.64475e-05
ENSG00000146457.10	WTAP	-0.0606922	-0.871992	-0.81599	3.68495e-05
ENSG00000203485.8	INF2	0.116743	-0.354008	-0.471669	3.68872e-05
ENSG00000129084.13	PSMA1	-0.0396707	-0.483374	-0.444596	3.725e-05
ENSG00000066777.4	ARFGEF1	0.119511	-0.390952	-0.511052	3.76641e-05
ENSG00000148488.11	ST8SIA6	0.646098	-0.736964	-1.39419	3.78779e-05
ENSG00000149308.12	NPAT	0.0467542	-0.890375	-0.942278	3.78779e-05
ENSG00000115685.10	PPP1R7	0.023531	-0.415037	-0.439239	3.80845e-05
ENSG00000122140.6	MRPS2	-0.0540933	-0.551303	-0.498322	3.81726e-05
ENSG00000104872.6	PIH1D1	0.0497092	-0.479609	-0.530474	3.82548e-05
ENSG00000100836.6	PABPN1	-0.122212	-0.911772	-0.793112	3.85393e-05
ENSG00000109066.9	TMEM104	0.286762	-0.438573	-0.726555	3.85393e-05
ENSG00000114686.4	MRPL3	0.00646604	-0.423937	-0.43088	3.91498e-05
ENSG00000141232.4	TOB1	0.333737	-0.553935	-0.890627	3.92861e-05
ENSG00000105063.14	PPP6R1	0.0187203	-0.255402	-0.274291	3.94774e-05
ENSG00000119705.5	SLIRP	-0.0503119	-0.441126	-0.391498	3.96619e-05
ENSG00000156017.8	C9orf41	0.0101713	-1.39232	-1.4194	3.9786e-05
ENSG00000123992.14	DNPEP	0.0168997	-0.556393	-0.574504	3.98276e-05
ENSG00000166887.11	VPS39	0.0591842	-0.614346	-0.676046	3.98384e-05
ENSG00000168002.7	POLR2G	0.171521	-0.250543	-0.42252	4.00374e-05
ENSG00000043462.7	LCP2	0.0748703	-0.341037	-0.416342	4.01112e-05
ENSG00000126107.10	HECTD3	0.0472826	-0.641546	-0.690883	4.02081e-05
ENSG00000085415.11	SEH1L	-0.0858374	-0.541075	-0.45652	4.0484e-05
ENSG00000122861.11	PLAU	0.157757	-0.395928	-0.554523	4.06323e-05
ENSG00000198492.10	YTHDF2	-0.0234209	-0.475733	-0.452998	4.06392e-05
ENSG00000042753.7	AP2S1	0.0143294	-0.389152	-0.403963	4.06392e-05
ENSG00000137207.7	YIPF3	0.0815125	-0.628031	-0.711783	4.06656e-05
ENSG00000132361.12	CLUH	-0.0762611	-0.398681	-0.322943	4.07363e-05
ENSG00000198265.7	HELZ	0.0783911	-0.490747	-0.570647	4.08271e-05
ENSG00000122068.8	FYTTD1	0.108011	-0.632942	-0.743658	4.08326e-05
ENSG00000099246.12	RAB18	0.174902	-0.555518	-0.732503	4.08326e-05
ENSG00000176055.9	MBLAC2	0.0870094	-1.32193	-1.42417	4.09167e-05
ENSG00000185900.5	POMK	-0.0472548	-0.836501	-0.793503	4.13839e-05
ENSG00000109919.5	MTCH2	0.0184385	-0.479993	-0.499083	4.1424e-05
ENSG00000183520.7	UTP11L	-0.0637533	-0.603201	-0.540971	4.16624e-05
ENSG00000182810.5	DDX28	0.0653632	-0.551904	-0.618822	4.16719e-05
ENSG00000075239.9	ACAT1	0.0436692	-0.256636	-0.300419	4.2133e-05
ENSG00000090266.8	NDUFB2	0.166841	-0.431488	-0.599701	4.26311e-05
ENSG00000163938.12	GNL3	-0.0148284	-0.382857	-0.36864	4.28766e-05
ENSG00000079277.15	MKNK1	0.168517	-0.437208	-0.606954	4.33823e-05
ENSG00000116459.6	ATP5F1	0.0695183	-0.284799	-0.354491	4.3686e-05
ENSG00000186074.14	CD300LF	0.348839	-0.351472	-0.701314	4.4852e-05
ENSG00000095015.5	MAP3K1	0.0907557	-0.376015	-0.467387	4.49449e-05
ENSG00000171824.9	EXOSC10	-0.109536	-0.551499	-0.442607	4.50372e-05
ENSG00000198189.6	HSD17B11	0.00213226	-0.419775	-0.42278	4.52698e-05
ENSG00000116161.13	CACYBP	-0.168676	-0.870716	-0.705165	4.54099e-05
ENSG00000144895.7	EIF2A	-0.0991196	-0.540081	-0.44197	4.58695e-05
ENSG00000095787.17	WAC	-0.0179198	-0.630766	-0.615019	4.65437e-05
ENSG00000116209.7	TMEM59	0.153292	-0.239779	-0.393232	4.67998e-05
ENSG00000175305.12	CCNE2	-0.114102	-0.985785	-0.876218	4.73227e-05
ENSG00000136504.7	KAT7	0.0662968	-0.554588	-0.62249	4.73852e-05
ENSG00000160213.5	CSTB	0.150477	-0.506352	-0.658226	4.74226e-05
ENSG00000115419.8	GLS	0.163522	-0.289506	-0.453693	4.86844e-05
ENSG00000111540.11	RAB5B	0.166616	-0.681823	-0.851937	4.88424e-05
ENSG00000171204.8	TMEM126B	-0.0662211	-0.981852	-0.920809	4.92443e-05
ENSG00000040633.8	PHF23	0.0999246	-0.611434	-0.713856	4.92443e-05
ENSG00000148334.10	PTGES2	0.0625509	-0.549085	-0.61321	4.96879e-05
ENSG00000085117.7	CD82	0.40613	-0.0386457	-0.444734	5.03686e-05
ENSG00000100813.10	ACIN1	0.14139	-0.140925	-0.282372	5.0506e-05
ENSG00000177700.5	POLR2L	-0.0258325	-0.58111	-0.556925	5.10515e-05
ENSG00000214160.5	ALG3	-0.114793	-0.634544	-0.521218	5.12452e-05
ENSG00000100664.6	EIF5	-0.0382193	-0.601172	-0.564423	5.20978e-05
ENSG00000076201.10	PTPN23	0.100475	-0.485426	-0.587072	5.27213e-05
ENSG00000129103.13	SUMF2	0.0946771	-0.359896	-0.455189	5.29603e-05
ENSG00000092148.8	HECTD1	0.0270519	-0.397592	-0.425186	5.29603e-05
ENSG00000205339.5	IPO7	-0.00938476	-0.418225	-0.409243	5.29663e-05
ENSG00000176953.6	NFATC2IP	-0.126397	-0.984892	-0.862815	5.2985e-05
ENSG00000198954.4	KIAA1279	-0.193392	-1.35908	-1.17798	5.31585e-05
ENSG00000136143.9	SUCLA2	0.227845	-0.462972	-0.692426	5.40904e-05
ENSG00000100243.16	CYB5R3	0.0900161	-0.28808	-0.378233	5.41381e-05
ENSG00000196843.11	ARID5A	0.123755	-0.930737	-1.06182	5.42058e-05
ENSG00000164548.6	TRA2A	0.027434	-0.42701	-0.455181	5.46828e-05
ENSG00000065413.12	ANKRD44	0.236344	-0.506185	-0.744568	5.60629e-05
ENSG00000213965.3	NUDT19	-0.0282	-0.61728	-0.590492	5.6169e-05
ENSG00000178814.11	OPLAH	0.909235	-0.455679	-1.36921	5.62955e-05
ENSG00000137575.7	SDCBP	0.0687871	-0.549834	-0.620475	5.63426e-05
ENSG00000149311.13	ATM	0.224054	-0.199937	-0.424026	5.64205e-05
ENSG00000126264.5	HCST	0.182224	-0.29956	-0.482318	5.66376e-05
ENSG00000113407.9	TARS	-0.214061	-0.470733	-0.256905	5.67321e-05
ENSG00000143819.8	EPHX1	0.11624	-0.662964	-0.781798	5.73851e-05
ENSG00000136754.12	ABI1	-0.0298365	-0.655088	-0.627119	5.81209e-05
ENSG00000206053.8	HN1L	-0.205108	-0.999999	-0.799395	5.87484e-05
ENSG00000171223.4	JUNB	-0.167132	-0.542213	-0.375756	5.94031e-05
ENSG00000182179.6	UBA7	0.314414	-0.124391	-0.438869	5.98417e-05
ENSG00000196313.7	POM121	0.902703	-1.05889	-1.98227	6.00509e-05
ENSG00000100348.5	TXN2	0.03989	-0.564352	-0.605799	6.08097e-05
ENSG00000164190.12	NIPBL	0.0800597	-0.402098	-0.483176	6.08097e-05
ENSG00000161091.8	MFSD12	-0.0831762	-0.548893	-0.466647	6.0961e-05
ENSG00000125870.6	SNRPB2	-0.0509969	-0.483322	-0.432939	6.11231e-05
ENSG00000070495.10	JMJD6	-0.0828321	-0.871992	-0.793391	6.18595e-05
ENSG00000160209.14	PDXK	0.0446638	-0.525319	-0.571139	6.18861e-05
ENSG00000105755.3	ETHE1	0.103254	-0.481708	-0.586102	6.21385e-05
ENSG00000090686.11	USP48	0.0650562	-0.336525	-0.402146	6.2535e-05
ENSG00000171174.9	RBKS	0.139647	-0.812914	-0.958224	6.2667e-05
ENSG00000164332.6	UBLCP1	0.129084	-0.546488	-0.677532	6.29602e-05
ENSG00000124299.9	PEPD	0.154044	-0.305559	-0.460127	6.29602e-05
ENSG00000185187.8	SIGIRR	0.294743	-0.472068	-0.768827	6.29814e-05
ENSG00000101901.6	ALG13	0.266103	-0.673771	-0.943824	6.40539e-05
ENSG00000111596.7	CNOT2	0.105901	-0.456176	-0.562975	6.43993e-05
ENSG00000106591.3	MRPL32	-0.0850427	-0.807354	-0.725357	6.49211e-05
ENSG00000181555.15	SETD2	-0.0198275	-0.603699	-0.585253	6.49282e-05
ENSG00000170322.10	NFRKB	0.0052227	-0.658383	-0.666242	6.51377e-05
ENSG00000141971.8	MVB12A	-0.00761986	-0.697437	-0.691922	6.5582e-05
ENSG00000162402.8	USP24	0.0530071	-0.468844	-0.522822	6.58071e-05
ENSG00000135596.13	MICAL1	0.0889845	-0.24364	-0.332789	6.61082e-05
ENSG00000130748.6	TMEM160	-0.159608	-0.874469	-0.717908	6.62086e-05
ENSG00000087008.11	ACOX3	0.22187	-0.47045	-0.693772	6.63963e-05
ENSG00000164597.9	COG5	0.197218	-0.386278	-0.58445	6.64541e-05
ENSG00000146278.10	PNRC1	0.32677	-0.532873	-0.862294	6.66984e-05
ENSG00000156030.8	ELMSAN1	0.0968457	-0.503432	-0.601758	6.71678e-05
ENSG00000157916.14	RER1	0.013941	-0.612976	-0.629239	6.74413e-05
ENSG00000197969.7	VPS13A	0.106868	-0.652076	-0.761459	6.79036e-05
ENSG00000184677.12	ZBTB40	0.025624	-0.815575	-0.845377	6.80202e-05
ENSG00000087088.15	BAX	0.367055	0.00451572	-0.3625	6.80457e-05
ENSG00000170836.7	PPM1D	0.246873	-0.488499	-0.736986	6.83564e-05
ENSG00000103415.7	HMOX2	0.141588	-0.447459	-0.590648	6.89875e-05
ENSG00000163754.13	GYG1	0.0996253	-0.710493	-0.813936	6.95311e-05
ENSG00000171566.7	PLRG1	-0.0698546	-0.535493	-0.466379	6.95311e-05
ENSG00000123297.12	TSFM	-0.0644807	-0.716927	-0.655139	6.99066e-05
ENSG00000103423.9	DNAJA3	-0.0299935	-0.572362	-0.543569	6.99489e-05
ENSG00000106397.7	PLOD3	0.0509524	-0.547487	-0.600186	7.03761e-05
ENSG00000100266.13	PACSIN2	0.0688316	-0.427421	-0.496925	7.09829e-05
ENSG00000069869.11	NEDD4	-0.305032	-2.41503	-2.15971	7.13629e-05
ENSG00000112893.5	MAN2A1	-0.109497	-0.879145	-0.773438	7.14642e-05
ENSG00000151304.5	SRFBP1	0.0777705	-0.780218	-0.861823	7.1561e-05
ENSG00000095066.7	HOOK2	0.102841	-1.09516	-1.20959	7.16708e-05
ENSG00000131558.10	EXOC4	0.131748	-0.293196	-0.425374	7.22719e-05
ENSG00000171720.5	HDAC3	0.0807128	-0.631612	-0.714899	7.23764e-05
ENSG00000111011.13	RSRC2	-0.0355101	-0.675871	-0.642953	7.23764e-05
ENSG00000170684.4	ZNF296	0.101727	-0.483424	-0.586424	7.23764e-05
ENSG00000128731.11	HERC2	0.224238	-0.267772	-0.492274	7.23764e-05
ENSG00000134602.11	MST4	0.12398	-0.361555	-0.486116	7.24666e-05
ENSG00000105053.6	VRK3	0.0191506	-0.521537	-0.541609	7.28754e-05
ENSG00000074695.5	LMAN1	-0.215641	-0.623196	-0.408498	7.3597e-05
ENSG00000113569.11	NUP155	-0.185643	-0.533521	-0.348442	7.38564e-05
ENSG00000115816.9	CEBPZ	-0.014861	-0.469063	-0.455067	7.46329e-05
ENSG00000164244.16	PRRC1	-0.119155	-0.597086	-0.478856	7.53822e-05
ENSG00000139436.16	GIT2	0.209303	-0.248743	-0.458785	7.53822e-05
ENSG00000175054.10	ATR	0.0995185	-0.489384	-0.590638	7.56653e-05
ENSG00000111300.5	NAA25	0.0554107	-0.753839	-0.812558	7.5875e-05
ENSG00000188352.8	FOCAD	-0.0257474	-0.510796	-0.486083	7.5875e-05
ENSG00000100354.16	TNRC6B	0.112452	-0.404149	-0.517891	7.60629e-05
ENSG00000123485.7	HJURP	-0.353668	-0.926751	-0.575714	7.62875e-05
ENSG00000151702.12	FLI1	0.0935723	-0.436099	-0.531082	7.63623e-05
ENSG00000087206.12	UIMC1	-0.0661588	-1.04307	-0.984081	7.65958e-05
ENSG00000175203.11	DCTN2	-0.0517875	-0.592698	-0.542246	7.65958e-05
ENSG00000134996.11	OSTF1	0.0935489	-0.528176	-0.623413	7.67281e-05
ENSG00000129518.4	EAPP	0.0636043	-0.625604	-0.691325	7.68312e-05
ENSG00000108788.7	MLX	0.0694495	-0.689659	-0.762444	7.73623e-05
ENSG00000198015.8	MRPL42	0.0510316	-0.767339	-0.822139	7.74585e-05
ENSG00000028116.12	VRK2	0.0215462	-0.917537	-0.945135	7.865e-05
ENSG00000070831.11	CDC42	0.0726815	-0.42303	-0.496888	7.8727e-05
ENSG00000164466.8	SFXN1	-0.141219	-0.81516	-0.676984	7.88415e-05
ENSG00000131966.9	ACTR10	0.109654	-0.599462	-0.711538	7.90069e-05
ENSG00000171222.6	SCAND1	0.0586732	-0.384823	-0.444494	7.91283e-05
ENSG00000151835.9	SACS	-0.0416965	-0.642678	-0.603126	7.96798e-05
ENSG00000137413.11	TAF8	0.0179388	-1.02308	-1.04855	7.99812e-05
ENSG00000162104.5	ADCY9	0.215383	-0.284143	-0.500068	8.00202e-05
ENSG00000099917.13	MED15	0.00394258	-0.464164	-0.468662	8.07207e-05
ENSG00000166333.9	ILK	0.554589	-0.337772	-0.893466	8.08825e-05
ENSG00000105793.11	GTPBP10	0.102713	-0.754887	-0.861795	8.09859e-05
ENSG00000121390.13	PSPC1	-0.0708979	-0.507537	-0.437735	8.19266e-05
ENSG00000126067.7	PSMB2	-0.101927	-0.452512	-0.351033	8.21467e-05
ENSG00000132963.7	POMP	-0.0857221	-0.4411	-0.355633	8.21748e-05
ENSG00000121210.11	KIAA0922	0.171655	-0.421463	-0.594061	8.2358e-05
ENSG00000175221.10	MED16	0.00070861	-0.430144	-0.431553	8.24285e-05
ENSG00000133961.15	NUMB	-0.0689294	-0.562936	-0.495313	8.26173e-05
ENSG00000152082.9	MZT2B	0.095185	-0.578536	-0.676261	8.28523e-05
ENSG00000163154.5	TNFAIP8L2	0.136062	-0.418143	-0.555223	8.35633e-05
ENSG00000185420.14	SMYD3	0.207857	-0.215337	-0.423331	8.42245e-05
ENSG00000213079.5	SCAF8	0.0318186	-0.476099	-0.509321	8.42454e-05
ENSG00000147854.12	UHRF2	0.0844981	-0.59136	-0.678539	8.56162e-05
ENSG00000160285.10	LSS	0.150805	-0.216004	-0.366889	8.71057e-05
ENSG00000100612.9	DHRS7	0.149004	-0.635588	-0.787893	8.76507e-05
ENSG00000119396.6	RAB14	0.0612917	-0.415037	-0.476992	8.89095e-05
ENSG00000176438.8	SYNE3	-0.0356452	-0.64075	-0.607005	8.9024e-05
ENSG00000137259.2	HIST1H2AB	-0.274162	-0.573356	-0.299808	8.9024e-05
ENSG00000068366.15	ACSL4	0.10452	-0.228874	-0.33337	8.9278e-05
ENSG00000149781.8	FERMT3	0.193901	-0.122187	-0.316131	8.97618e-05
ENSG00000138756.13	BMP2K	-0.00978099	-1.09115	-1.09145	9.04461e-05
ENSG00000156976.10	EIF4A2	0.115594	-0.357552	-0.473607	9.08655e-05
ENSG00000108278.7	ZNHIT3	0.310788	-0.742842	-1.05796	9.13783e-05
ENSG00000132388.8	UBE2G1	0.0331516	-0.650253	-0.685654	9.23043e-05
ENSG00000036054.8	TBC1D23	0.0730195	-0.708951	-0.785336	9.26026e-05
ENSG00000206560.6	ANKRD28	-0.122296	-0.921144	-0.803984	9.31884e-05
ENSG00000101474.7	APMAP	0.0682314	-0.447459	-0.516539	9.32038e-05
ENSG00000126804.9	ZBTB1	0.143182	-0.530514	-0.676077	9.40377e-05
ENSG00000103363.10	TCEB2	0.19252	-0.168471	-0.36125	9.40377e-05
ENSG00000163507.9	KIAA1524	-0.349098	-1.15966	-0.816304	9.42782e-05
ENSG00000112096.12	SOD2	-0.111874	-0.798366	-0.689985	9.45702e-05
ENSG00000091039.12	OSBPL8	0.0379018	-0.660911	-0.701294	9.46177e-05
ENSG00000049656.9	CLPTM1L	0.0228082	-0.657112	-0.682142	9.46177e-05
ENSG00000118193.7	KIF14	-0.336525	-1.12433	-0.79267	9.52925e-05
ENSG00000168827.10	GFM1	0.0258907	-0.405711	-0.432247	9.56638e-05
ENSG00000167543.11	TP53I13	0.0994966	-0.792194	-0.896871	9.57749e-05
ENSG00000010165.15	METTL13	-0.0296034	-0.618571	-0.590484	9.58236e-05
ENSG00000166847.5	DCTN5	0.0453012	-0.672425	-0.720249	9.60518e-05
ENSG00000100154.10	TTC28	0.266857	-0.115919	-0.382936	9.68672e-05
ENSG00000136937.8	NCBP1	-0.0626151	-0.404596	-0.342455	9.70827e-05
ENSG00000115415.14	STAT1	0.0284148	-0.384962	-0.413704	9.85751e-05
ENSG00000186153.12	WWOX	0.0548272	-1.12553	-1.19278	9.89276e-05
ENSG00000168071.17	CCDC88B	0.300915	-0.372809	-0.675293	9.89315e-05
ENSG00000064961.14	HMG20B	0.00189266	-0.483985	-0.486848	9.96858e-05
ENSG00000139131.8	YARS2	-0.141089	-0.789433	-0.650641	9.98048e-05
ENSG00000130005.7	GAMT	0.193869	-0.415037	-0.610548	9.99067e-05
ENSG00000116005.7	PCYOX1	0.229169	-0.321928	-0.551933	0.000100195
ENSG00000138796.11	HADH	0.0531317	-0.408805	-0.462385	0.000100717
ENSG00000145241.6	CENPC	0.0696317	-0.95109	-1.02845	0.000101473
ENSG00000121741.12	ZMYM2	0.201572	-0.505235	-0.709013	0.000101562
ENSG00000146842.12	TMEM209	-0.0955133	-0.557128	-0.462519	0.000101564
ENSG00000183605.12	SFXN4	-0.100083	-0.981852	-0.887643	0.000101737
ENSG00000139505.10	MTMR6	-0.0674629	-0.947532	-0.884949	0.000101907
ENSG00000165688.7	PMPCA	0.061816	-0.29768	-0.360005	0.000102205
ENSG00000164151.7	KIAA0947	0.00142878	-0.851477	-0.857789	0.000103341
ENSG00000213585.6	VDAC1	-0.0100888	-0.543621	-0.534774	0.000105596
ENSG00000077254.10	USP33	0.0680157	-0.443301	-0.512575	0.000106255
ENSG00000109674.3	NEIL3	-0.421278	-1.44931	-1.03842	0.000106949
ENSG00000114395.6	CYB561D2	0.0720814	-0.687212	-0.762843	0.000107154
ENSG00000111641.6	NOP2	-0.0197491	-0.410406	-0.391229	0.000107194
ENSG00000120705.8	ETF1	-0.0317583	-0.635235	-0.605111	0.000107605
ENSG00000146540.10	C7orf50	0.183683	-0.874468	-1.06456	0.000111193
ENSG00000243646.4	IL10RB	0.231035	-0.686841	-0.922847	0.000111364
ENSG00000241973.6	PI4KA	0.166913	-0.236067	-0.403441	0.000111815
ENSG00000115919.10	KYNU	0.326475	-0.131911	-0.458809	0.000111929
ENSG00000132953.12	XPO4	-0.12555	-0.662304	-0.538166	0.000112124
ENSG00000136045.7	PWP1	-0.000268411	-0.525461	-0.526064	0.000112843
ENSG00000141985.5	SH3GL1	-0.069197	-0.69773	-0.631295	0.000113565
ENSG00000206503.7	HLA-A	0.339594	-0.00773539	-0.347359	0.000113565
ENSG00000178074.5	C2orf69	-0.122939	-1.83007	-1.73933	0.00011364
ENSG00000196890.3	HIST3H2BB	-0.711152	-1.922	-1.22658	0.000114006
ENSG00000100983.5	GSS	0.111658	-0.406817	-0.519664	0.000115599
ENSG00000100888.8	CHD8	0.0266888	-0.428334	-0.4558	0.00011601
ENSG00000198901.9	PRC1	-0.295331	-0.650508	-0.356155	0.000116136
ENSG00000143314.8	MRPL24	-0.0276905	-0.598901	-0.572859	0.000117063
ENSG00000137486.12	ARRB1	0.206957	-0.282399	-0.489894	0.000118403
ENSG00000137074.14	APTX	0.0559442	-0.823121	-0.883756	0.000118477
ENSG00000068831.14	RASGRP2	-0.121326	-0.557376	-0.436867	0.000118775
ENSG00000107938.13	C10orf137	0.0337604	-0.824428	-0.862193	0.000118809
ENSG00000103978.11	TMEM87A	0.00473675	-0.542149	-0.548534	0.000118809
ENSG00000117751.13	PPP1R8	-0.207833	-0.854569	-0.65	0.000119381
ENSG00000111845.4	PAK1IP1	-0.0608504	-0.76296	-0.704735	0.000120912
ENSG00000148396.14	SEC16A	0.0439634	-0.250696	-0.294688	0.000122687
ENSG00000100258.13	LMF2	-0.193465	-0.881944	-0.691827	0.000122843
ENSG00000144136.6	SLC20A1	-0.456694	-0.974689	-0.520245	0.000123182
ENSG00000126001.11	CEP250	0.0255592	-0.655665	-0.683563	0.000123541
ENSG00000135069.9	PSAT1	-0.47357	-0.915935	-0.443923	0.000124474
ENSG00000166946.9	CCNDBP1	0.161779	-0.284096	-0.446753	0.000124563
ENSG00000161203.9	AP2M1	0.0523284	-0.221964	-0.274302	0.000124705
ENSG00000101193.6	GID8	-0.0485447	-0.895663	-0.852713	0.000126476
ENSG00000130640.9	TUBGCP2	0.105263	-0.316368	-0.421943	0.000127858
ENSG00000128928.4	IVD	0.351246	-0.10103	-0.4524	0.000128468
ENSG00000135218.13	CD36	0.520142	-0.187627	-0.708294	0.000129107
ENSG00000127084.13	FGD3	0.305822	-0.306331	-0.613321	0.000129393
ENSG00000001167.10	NFYA	-0.0136501	-0.657112	-0.646183	0.000131227
ENSG00000186635.10	ARAP1	0.188324	-0.188445	-0.376821	0.000131227
ENSG00000146463.7	ZMYM4	0.127167	-0.43244	-0.560986	0.000131693
ENSG00000105771.9	SMG9	-0.122375	-0.550767	-0.42946	0.000131693
ENSG00000083520.10	DIS3	0.0421508	-0.391281	-0.4343	0.00013273
ENSG00000037474.10	NSUN2	-0.0395283	-0.474243	-0.435415	0.000133038
ENSG00000130164.7	LDLR	-0.137868	-0.401798	-0.264138	0.000133038
ENSG00000130303.8	BST2	0.0219593	-0.280536	-0.302668	0.000133119
ENSG00000146729.5	GBAS	0.0204104	-0.802553	-0.82784	0.000133975
ENSG00000145604.11	SKP2	-0.222736	-1.06559	-0.847902	0.000134237
ENSG00000091164.8	TXNL1	0.0296729	-0.408805	-0.439074	0.000134302
ENSG00000130489.8	SCO2	0.0719218	-0.652076	-0.726509	0.000134668
ENSG00000087191.8	PSMC5	-0.0684784	-0.422773	-0.355025	0.000134668
ENSG00000160194.13	NDUFV3	0.170236	-0.257936	-0.428886	0.000135381
ENSG00000123444.9	KBTBD4	0.134352	-0.724365	-0.862145	0.000136482
ENSG00000132357.9	CARD6	0.150436	-0.888968	-1.04789	0.000136852
ENSG00000137200.8	CMTR1	0.0987031	-0.652076	-0.753767	0.000138827
ENSG00000109103.7	UNC119	0.140615	-1.14439	-1.30215	0.000138927
ENSG00000196455.3	PIK3R4	-0.0206376	-0.558967	-0.539544	0.000142037
ENSG00000141279.11	NPEPPS	0.0626674	-0.385431	-0.449009	0.000142593
ENSG00000146834.9	MEPCE	0.00257904	-0.485426	-0.489074	0.00014283
ENSG00000132475.4	H3F3B	0.0411851	-0.247062	-0.288238	0.000143451
ENSG00000178691.6	SUZ12	-0.125787	-0.795859	-0.672748	0.000144093
ENSG00000124198.8	ARFGEF2	0.0322099	-0.640457	-0.674936	0.000146219
ENSG00000188566.7	NDOR1	-0.0376502	-0.851477	-0.818223	0.000147799
[truncated: 2,423 more rows]
