# Supplementary material for: Ribosome subunit attrition and activation of the p53–MDM4 axis dominate the response of MLL-rearranged cancer cells to WDR5 WIN site inhibition
Source: eLife. 2024 Apr 29;12:RP90683. doi: 10.7554/eLife.90683 (PMC11057873; doi:10.7554/eLife.90683)
Supplement: Figure 4—source data 1. [file elife-90683-fig4-data1.xlsx]

## Sheet: Tier I Screen
id	num	neg|score	neg|p-value	neg|fdr	neg|rank	neg|goodsgrna	neg|lfc	pos|score	pos|p-value	pos|fdr	pos|rank	pos|goodsgrna	pos|lfc	status_of_mirna_in_mirbase	tier_II_screen
TP53	6	1	1	1	21708	0	11.313	2.0837e-24	2.2805e-07	0.00019	1	6	11.313
RPL22	6	1	1	1	21687	0	7.1529	1.6072e-14	2.2805e-07	0.00019	2	6	7.1529
BAX	6	1	1	1	21705	0	4.3085	6.9912e-13	2.2805e-07	0.00019	3	6	4.3085		Included
KDM6A	6	1	1	1	21707	0	3.2563	1.1101e-12	2.2805e-07	0.00019	4	6	3.2563		Included
SPOP	6	1	1	1	21706	0	2.6943	4.8385e-12	2.2805e-07	0.00019	5	6	2.6943		Included
UBE2A	6	1	1	1	21704	0	3.0689	1.738e-11	2.2805e-07	0.00019	6	6	3.0689		Included
FBXO42	6	1	1	1	21703	0	3.7935	2.6267e-11	2.2805e-07	0.00019	7	6	3.7935		Included
FOXM1	6	1	1	1	21702	0	2.3555	4.9448e-11	2.2805e-07	0.00019	8	6	2.3555		Included
LARP4B	6	1	1	1	21701	0	2.4784	1.0164e-10	2.2805e-07	0.00019	9	6	2.4784		Included
NBN	6	1	1	1	21700	0	2.2006	1.4079e-10	2.2805e-07	0.00019	10	6	2.2006		Included
PMAIP1	6	1	1	1	21699	0	2.7711	1.7664e-10	2.2805e-07	0.00019	11	6	2.7711		Included
CCDC6	6	1	1	1	21688	0	3.4632	2.9584e-10	2.2805e-07	0.00019	12	6	3.4632		Included
ZC3HC1	6	1	1	1	21698	0	2.5935	4.993e-10	2.2805e-07	0.00019	13	6	2.5935		Included
CDKN2A	6	0.99652	0.99656	1	21471	0	4.6699	7.6443e-10	2.2805e-07	0.00019	14	5	4.6699		Included
SENP1	6	1	1	1	21697	0	1.9949	1.3671e-09	2.2805e-07	0.00019	15	6	1.9949		Included
CHEK2	6	0.99331	0.99334	1	21331	0	2.5859	4.2152e-09	2.2805e-07	0.00019	16	5	2.5859		Included
EPC1	6	1	1	1	21696	0	2.3432	4.2923e-09	2.2805e-07	0.00019	17	6	2.3432		Included
GPS2	6	0.99244	0.99246	1	21291	0	2.4566	4.6996e-09	2.2805e-07	0.00019	18	5	2.4566		Included
NCOA6	6	1	1	1	21693	0	2.8041	4.8175e-09	2.2805e-07	0.00019	19	6	2.8041		Included
ZNF367	6	1	1	1	21695	0	1.9772	6.3366e-09	2.2805e-07	0.00019	20	6	1.9772		Included
ARID4A	6	1	1	1	21694	0	1.8988	1.3192e-08	2.2805e-07	0.00019	21	6	1.8988		Included
UBA6	6	0.89036	0.89047	1	17782	0	2.4429	2.263e-08	2.2805e-07	0.00019	22	5	2.4429		Included
BIRC6	6	0.99989	0.9999	1	21661	0	3.3539	2.6918e-08	2.2805e-07	0.00019	23	6	3.3539		Included
VDAC2	6	0.89954	0.89968	1	18047	0	3.1948	2.7473e-08	2.2805e-07	0.00019	24	4	3.1948		Included
ETFDH	6	1	1	1	21692	0	1.8743	3.0107e-08	2.2805e-07	0.00019	25	6	1.8743		Included
KCMF1	6	0.93867	0.93892	1	19348	0	2.7463	4.6604e-08	2.2805e-07	0.00019	26	5	2.7463		Included
ATM	6	0.99952	0.99952	1	21624	0	2.8145	5.8628e-08	6.8415e-07	0.00053	27	6	2.8145		Included
ATAD1	6	0.99322	0.99325	1	21328	0	2.4165	7.5723e-08	6.8415e-07	0.00053	28	5	2.4165		Included
WAC	6	1	1	1	21691	0	2.8451	8.1011e-08	1.1402e-06	0.000825	29	6	2.8451		Included
GMEB1	6	0.98583	0.98593	1	21024	0	2.5605	9.8971e-08	1.1402e-06	0.000825	30	4	2.5605		Included
UBR4	6	1	1	1	21690	0	2.1199	1.3873e-07	1.5963e-06	0.001118	31	6	2.1199		Included
THRA	6	0.98384	0.98395	1	20936	0	2.2827	1.7758e-07	2.0524e-06	0.00135	32	5	2.2827		Included
ZBTB14	6	1	1	1	21689	0	2.5588	1.7841e-07	2.0524e-06	0.00135	33	6	2.5588		Included
CAPRIN1	6	1	1	1	21686	0	2.3785	4.7693e-07	3.4207e-06	0.002184	34	6	2.3785		Included
ZMYM3	6	1	1	1	21683	0	1.8652	5.3893e-07	3.8768e-06	0.002405	35	6	1.8652		Included
PTPN1	6	1	1	1	21685	0	1.7797	9.1307e-07	7.2976e-06	0.004299	36	6	1.7797		Included
JARID2	6	1	1	1	21680	0	2.2519	9.2127e-07	7.5256e-06	0.004299	37	6	2.2519		Included
PTPN2	6	1	1	1	21684	0	1.8831	9.959e-07	7.5256e-06	0.004299	38	6	1.8831		Included
CDK8	6	0.99792	0.99793	1	21532	0	2.1912	1.1855e-06	7.9817e-06	0.004443	39	6	2.1912		Included
UBE2E1	6	0.99986	0.99986	1	21655	0	2.0374	1.4503e-06	8.4378e-06	0.004468	40	6	2.0374		Included
METAP1	6	0.99994	0.99994	1	21666	0	1.7268	1.4611e-06	8.4378e-06	0.004468	41	6	1.7268		Included
EPC2	6	0.993	0.99304	1	21315	0	2.2366	1.5026e-06	8.8939e-06	0.004597	42	5	2.2366		Included
ATXN3	6	0.99983	0.99984	1	21653	0	2.1314	1.7166e-06	1.1174e-05	0.005641	43	6	2.1314		Included
IPO5	6	0.99621	0.99626	1	21456	0	2.3867	1.8594e-06	1.1631e-05	0.005738	44	5	2.3867		Included
SAMHD1	6	0.99728	0.9973	1	21508	0	2.0568	2.1639e-06	1.3455e-05	0.006491	45	6	2.0568		Included
FBXO28	6	1	1	1	21682	0	1.3124	2.7741e-06	1.8472e-05	0.008717	46	6	1.3124		Included
NSUN2	6	0.99649	0.99653	1	21469	0	2.2699	2.8695e-06	2.0296e-05	0.009374	47	5	2.2699		Included
SEZ6	6	1	1	1	21681	0	1.3742	2.8768e-06	2.0752e-05	0.009385	48	6	1.3742		Included
GET4	6	0.99949	0.9995	1	21622	0	1.9536	3.2679e-06	2.3945e-05	0.010608	49	6	1.9536		Included
ZMAT3	6	0.99233	0.99236	1	21286	0	2.8049	3.4461e-06	2.4857e-05	0.010792	50	5	2.8049		Included
BRMS1	6	1	1	1	21679	0	1.1636	3.775e-06	2.6226e-05	0.011163	51	6	1.1636		Included
NUP98	6	0.99999	1	1	21678	0	1.2803	5.2234e-06	3.8084e-05	0.015899	52	6	1.2803		Included
GPATCH8	6	0.99935	0.99936	1	21614	0	1.9583	6.1218e-06	4.4926e-05	0.018401	53	6	1.9583		Included
SFI1	6	0.41954	0.56161	1	9030	1	0.29267	6.4667e-06	4.7662e-05	0.01916	54	3	0.29267		Included
D2HGDH	6	0.9911	0.99112	1	21239	0	1.9018	7.2032e-06	5.0855e-05	0.020072	55	5	1.9018		Included
PCIF1	6	0.99972	0.99973	1	21640	0	1.4223	8.0397e-06	5.8153e-05	0.022147	56	6	1.4223		Included
SENP3	6	0.86466	0.86462	1	17006	0	1.9262	8.5321e-06	6.0889e-05	0.022789	57	4	1.9262		Included
UBQLN4	6	0.99647	0.99651	1	21465	0	1.8256	9.1743e-06	6.4538e-05	0.023746	58	5	1.8256		Included
ZGPAT	6	0.99999	0.99999	1	21677	0	1.6346	1.2863e-05	8.9167e-05	0.032261	59	6	1.6346		Included
XPNPEP1	6	0.61769	0.67882	1	11674	1	2.0378	1.4107e-05	9.6465e-05	0.034095	60	4	2.0378		Included
THRAP3	6	0.99999	0.99999	1	21676	0	1.623	1.4325e-05	9.7377e-05	0.034095	61	6	1.623		Included
RBM10	6	0.83389	0.83375	1	16079	0	1.7808	1.5292e-05	9.9658e-05	0.034339	62	4	1.7808		Included
CHUK	6	0.99998	0.99999	1	21675	0	1.2093	1.6166e-05	0.00010376	0.035195	63	6	1.2093		Included
CELF2	6	0.99998	0.99999	1	21674	0	1.4485	1.7469e-05	0.0001106	0.036529	64	6	1.4485		Included
KLF16	6	0.99826	0.99827	1	21557	0	1.9995	1.7628e-05	0.00011106	0.036529	65	6	1.9995		Included
CREBBP	6	0.99998	0.99998	1	21673	0	1.4343	1.8235e-05	0.0001138	0.03687	66	6	1.4343		Included
SLTM	3	0.99998	0.99999	1	21672	0	2.5326	1.8312e-05	5.496e-05	0.021305	67	3	2.5326		Included
KMT2D	6	0.99995	0.99996	1	21669	0	1.6735	2.1405e-05	0.00013022	0.04157	68	6	1.6735		Included
ETFA	6	0.99996	0.99996	1	21670	0	1.2669	2.3308e-05	0.00014344	0.045128	69	6	1.2669		Included
IRX3	6	0.98441	0.98453	1	20963	0	1.7876	2.7256e-05	0.00016442	0.05099	70	5	1.7876
ID2	6	0.97505	0.97518	1	20590	0	1.7048	2.8781e-05	0.00017355	0.053061	71	5	1.7048
SBNO2	6	0.95339	0.95351	1	19853	0	1.7829	3.0005e-05	0.00018084	0.054524	72	4	1.7829
C6orf226	6	0.99997	0.99997	1	21671	0	1.0038	3.4867e-05	0.00021231	0.063136	73	6	1.0038
BRINP3	6	0.84006	0.83996	1	16254	0	0.59219	3.9191e-05	0.00023238	0.06817	74	4	0.59219
PAN3	6	0.99707	0.99711	1	21495	0	1.9632	4.4023e-05	0.00025564	0.073993	75	5	1.9632
GNG13	6	0.97121	0.97124	1	20472	0	1.6765	4.6409e-05	0.00026887	0.076798	76	5	1.6765
INO80D	6	0.99982	0.99981	1	21648	0	1.5265	4.8961e-05	0.0002789	0.078536	77	6	1.5265
C2orf72	6	0.99995	0.99995	1	21668	0	1.0029	5.0001e-05	0.00028483	0.078536	78	6	1.0029
ZNF292	6	0.99995	0.99995	1	21667	0	1.3177	5.0303e-05	0.00028666	0.078536	79	6	1.3177
SLC44A5	6	0.97542	0.97555	1	20608	0	1.64	5.2248e-05	0.00029304	0.078536	80	5	1.64
FAM83F	6	0.98833	0.98839	1	21131	0	1.1486	5.2281e-05	0.00029304	0.078536	81	5	1.1486
ZER1	6	0.99802	0.99803	1	21537	0	1.8701	6.102e-05	0.00033044	0.086488	82	6	1.8701
SNX27	6	0.98261	0.98276	1	20892	0	1.2559	6.1582e-05	0.00033227	0.086488	83	5	1.2559
ANKRD11	6	0.17941	0.33567	1	5438	1	1.6758	6.8096e-05	0.00036556	0.092275	84	4	1.6758
NUDCD1	6	0.97485	0.97497	1	20585	0	1.5409	7.5503e-05	0.00040251	0.100432	85	5	1.5409
hsa-mir-215	4	0.97925	0.97933	1	20769	0	2.2956	8.3787e-05	0.000335	0.086488	86	3	2.2956	Active
hsa-mir-548l	4	0.99992	0.99991	1	21665	0	1.4929	8.4583e-05	0.00033865	0.086488	87	4	1.4929	Active
ADCK3	6	0.99991	0.99991	1	21664	0	1.3672	8.9666e-05	0.00048666	0.115207	88	6	1.3672
ZBTB33	6	0.97334	0.97339	1	20543	0	1.442	8.9733e-05	0.00048689	0.115207	89	4	1.442
PREP	6	0.99871	0.99871	1	21572	0	1.3449	9.4819e-05	0.00051471	0.120129	90	6	1.3449
UBE2W	6	0.8419	0.84181	1	16309	0	1.552	9.5579e-05	0.00052018	0.120129	91	4	1.552
HDAC4	6	0.99792	0.99793	1	21531	0	1.3381	0.00010125	0.00055028	0.124579	92	6	1.3381
UBLCP1	6	0.9999	0.9999	1	21663	0	1.3269	0.00010262	0.00055667	0.124579	93	6	1.3269
ATF6B	6	0.99989	0.9999	1	21662	0	0.96516	0.00010525	0.00057218	0.126463	94	6	0.96516
RB1	6	0.89337	0.89354	1	17872	0	1.6646	0.00010584	0.00057674	0.126463	95	5	1.6646
hsa-mir-665	4	0.93057	0.9305	1	19089	0	1.6908	0.00010644	0.00042987	0.106042	96	3	1.6908	Active
MZT2B	4	0.22723	0.34228	1	5991	1	1.7403	0.0001111	0.00044949	0.109634	97	3	1.7403
EIF2A	6	0.96441	0.96439	1	20231	0	1.1793	0.0001128	0.00061733	0.132879	98	5	1.1793
ELAVL1	6	0.99989	0.99989	1	21660	0	1.4322	0.00011325	0.00061824	0.132879	99	6	1.4322
ARHGEF19	6	0.99988	0.99989	1	21659	0	0.99958	0.00011602	0.00063375	0.134144	100	6	0.99958
GMEB2	6	0.96839	0.96836	1	20369	0	1.4558	0.00011629	0.00063649	0.134144	101	5	1.4558
LZTR1	6	0.99988	0.99989	1	21658	0	1.0502	0.00011949	0.00065199	0.136021	102	6	1.0502
DARC	6	0.95519	0.95525	1	19905	0	1.5604	0.00012072	0.00065792	0.136021	103	4	1.5604
hsa-mir-4652	4	0.99988	0.99988	1	21657	0	1.3911	0.00012155	0.00048825	0.115207	104	4	1.3911	Active
C7orf55-LUC7L2	5	0.99988	0.99989	1	21656	0	1.7342	0.00012165	0.00055621	0.124579	105	5	1.7342
HNRNPF	6	0.98646	0.98653	1	21053	0	1.4673	0.00012469	0.00067297	0.13782	106	4	1.4673
ZDHHC4	6	0.99945	0.99946	1	21619	0	1.2215	0.00012659	0.00068438	0.138845	107	6	1.2215
TLE3	6	0.93546	0.93566	1	19247	0	1.4722	0.00013624	0.00073728	0.148194	108	5	1.4722
PAIP2	6	0.98318	0.98331	1	20912	0	1.3779	0.00014144	0.00076419	0.152194	109	5	1.3779
CRAMP1L	6	0.99986	0.99986	1	21654	0	0.91538	0.00014255	0.00077195	0.15234	110	6	0.91538
CCNB1	6	0.95217	0.9523	1	19811	0	1.4332	0.00016004	0.00087001	0.167134	111	4	1.4332
SP3	6	0.38824	0.53134	1	8434	1	1.1541	0.00016936	0.00092064	0.170624	112	5	1.1541
FAM50A	6	0.99983	0.99983	1	21652	0	1.2677	0.00016937	0.00092064	0.170624	113	6	1.2677
HCFC2	6	0.85294	0.85283	1	16632	0	1.6993	0.00017	0.00092337	0.170624	114	5	1.6993
USP14	6	0.99971	0.99972	1	21639	0	1.269	0.00017046	0.00092748	0.170624	115	6	1.269
LMO7	6	0.99983	0.99983	1	21651	0	0.89143	0.00017232	0.00093705	0.170938	116	6	0.89143
LUZP4	6	0.99982	0.99982	1	21650	0	1.0957	0.00017892	0.00097856	0.17564	117	6	1.0957
UXS1	6	0.99962	0.99962	1	21632	0	1.3353	0.00017903	0.00097902	0.17564	118	6	1.3353
PAPD4	6	0.99982	0.99981	1	21649	0	0.834	0.00018394	0.0010105	0.1798	119	6	0.834
POGZ	6	0.99933	0.99934	1	21612	0	1.2651	0.00018808	0.0010301	0.180238	120	6	1.2651
UTY	6	0.9938	0.99383	1	21350	0	1.6696	0.00019003	0.0010374	0.180238	121	4	1.6696
UBE2V2	6	0.99981	0.99981	1	21647	0	1.2942	0.00019023	0.0010379	0.180238	122	6	1.2942
GFI1B	6	0.99648	0.99651	1	21466	0	1.5218	0.00019382	0.0010561	0.181921	123	5	1.5218
CXorf27	6	0.98038	0.98052	1	20806	0	1.1732	0.00019559	0.0010643	0.181921	124	5	1.1732
PKNOX1	6	0.99027	0.9903	1	21200	0	1.3516	0.00020094	0.0010853	0.184058	125	5	1.3516
UBAC1	6	0.99979	0.99979	1	21646	0	0.91733	0.00020592	0.0011117	0.185644	126	6	0.91733
UBE2D2	6	0.019307	0.06011	0.565917	2271	2	1.3802	0.00020971	0.0011336	0.187505	127	4	1.3802
GPATCH1	6	0.30638	0.45332	1	7067	1	1.1516	0.00021196	0.0011455	0.187505	128	4	1.1516
GRIK2	6	0.99979	0.99978	1	21645	0	0.84844	0.00021427	0.0011592	0.187505	129	6	0.84844
BCL2L12	6	0.94678	0.9469	1	19617	0	1.3767	0.00021599	0.0011692	0.187505	130	4	1.3767
MEMO1	6	0.73746	0.7515	1	13717	1	1.3625	0.00021744	0.0011756	0.187505	131	5	1.3625
APBB2	6	0.99279	0.99281	1	21306	0	0.95325	0.00021839	0.0011804	0.187505	132	5	0.95325
FHL3	6	0.99978	0.99978	1	21644	0	0.83303	0.00021898	0.0011833	0.187505	133	6	0.83303
ATP2B1	6	0.99883	0.99883	1	21578	0	1.3751	0.00022331	0.0011989	0.18787	134	6	1.3751
BRD2	6	0.99977	0.99977	1	21643	0	0.72017	0.00022809	0.0012239	0.189781	135	6	0.72017
TEAD3	6	0.99977	0.99977	1	21642	0	1.2631	0.00023047	0.0012358	0.190261	136	6	1.2631
C1GALT1	6	0.72295	0.74139	1	13417	1	1.1166	0.00024826	0.0013311	0.20207	137	5	1.1166
PATL1	6	0.86445	0.86441	1	16994	0	1.3175	0.00025678	0.0013745	0.207199	138	5	1.3175
HDAC2	6	0.9921	0.99211	1	21275	0	1.004	0.00026366	0.0014164	0.212052	139	5	1.004
CCNL2	6	0.99271	0.99273	1	21301	0	1.3277	0.00026752	0.0014351	0.21338	140	4	1.3277
DCP2	6	0.99883	0.99883	1	21577	0	1.37	0.00027091	0.0014511	0.214286	141	6	1.37
ZNF280C	6	0.99972	0.99973	1	21641	0	1.0711	0.00027871	0.0014999	0.219996	142	6	1.0711
VDAC3	6	0.9932	0.99324	1	21326	0	1.436	0.00030445	0.0016244	0.23666	143	4	1.436
hsa-mir-488	4	0.99969	0.99967	1	21638	0	1.0475	0.00031348	0.001203	0.18787	144	4	1.0475	Active
SGMS1	6	0.99969	0.99969	1	21637	0	1.335	0.00031432	0.0016746	0.241899	145	6	1.335
POU2F3	6	0.99968	0.99969	1	21636	0	0.84321	0.00031791	0.0016896	0.241899	146	6	0.84321
NKTR	6	0.99558	0.99563	1	21427	0	1.3884	0.00032022	0.0017019	0.241899	147	5	1.3884
PATE3	6	0.46981	0.61107	1	10038	1	0.96367	0.00032229	0.0017161	0.241899	148	3	0.96367
EMC6	6	0.99966	0.99967	1	21635	0	1.0976	0.00033555	0.0017831	0.248128	149	6	1.0976
EP400	6	0.50029	0.6241	1	10299	1	1.063	0.00035308	0.0018759	0.259381	150	3	1.063
PRSS48	6	0.39249	0.53552	1	8519	2	0.90366	0.00035735	0.001899	0.259636	151	3	0.90366
ILKAP	6	0.99964	0.99965	1	21634	0	0.92918	0.00035781	0.0019017	0.259636	152	6	0.92918
PAX8	6	0.99963	0.99963	1	21633	0	0.99194	0.00037242	0.0019742	0.266189	153	6	0.99194
SNX31	6	0.92904	0.92929	1	19038	0	0.31014	0.00037666	0.0019966	0.267541	154	3	0.31014
EIF1AY	6	0.99559	0.99565	1	21428	0	1.3554	0.00038119	0.0020226	0.269362	155	5	1.3554
ARL14EP	6	0.54994	0.64576	1	10788	1	1.1686	0.00038852	0.0020581	0.271977	156	4	1.1686
SEC14L3	6	0.99961	0.99961	1	21631	0	0.862	0.00039042	0.0020673	0.271977	157	6	0.862
NAT9	6	0.9996	0.9996	1	21630	0	0.73374	0.0003992	0.0021028	0.274352	158	6	0.73374
TMEM182	6	0.87496	0.87504	1	17311	0	1.3997	0.00040082	0.0021106	0.274352	159	4	1.3997
BCAR1	6	0.99016	0.9902	1	21194	0	1.0627	0.00040385	0.0021298	0.275194	160	5	1.0627
UGDH	6	0.99959	0.99959	1	21629	0	0.73178	0.00041057	0.0021699	0.27552	161	6	0.73178
ASB8	6	0.99959	0.99959	1	21628	0	0.90021	0.00041064	0.0021703	0.27552	162	6	0.90021
IDO1	6	0.99913	0.99914	1	21600	0	1.1239	0.00041355	0.0021863	0.275933	163	6	1.1239
LOC100132146	6	0.95099	0.9511	1	19772	0	0.8956	0.00042687	0.0022495	0.281467	164	4	0.8956
APPL1	6	0.14562	0.28742	1	4830	2	1.3519	0.0004285	0.0022561	0.281467	165	4	1.3519
PPP1R3C	6	0.99956	0.99956	1	21627	0	0.85511	0.00043817	0.002299	0.284919	166	6	0.85511
BBS7	6	0.19109	0.3463	1	5585	2	0.10194	0.00044109	0.0023117	0.284919	167	3	0.10194
MAP4K4	6	0.99584	0.99589	1	21437	0	1.2295	0.00044683	0.0023382	0.285154	168	5	1.2295
GCAT	6	0.99955	0.99955	1	21626	0	0.94432	0.00045167	0.0023619	0.286437	169	6	0.94432
TPP2	6	0.99955	0.99955	1	21625	0	0.91358	0.00045479	0.0023774	0.286716	170	6	0.91358
ZBTB24	6	0.77025	0.7763	1	14422	1	1.3258	0.00045852	0.0023938	0.287101	171	5	1.3258
ISL1	6	0.72704	0.74415	1	13515	1	1.0421	0.00046558	0.0024317	0.290039	172	4	1.0421
OPRL1	6	0.80485	0.80558	1	15273	1	0.23242	0.00047708	0.0024851	0.294312	173	1	0.23242
ABCB8	6	0.40637	0.54884	1	8779	2	0.080366	0.00047946	0.0024946	0.294312	174	2	0.080366
OTUD4	6	0.85908	0.85903	1	16819	0	1.3559	0.00048645	0.0025311	0.295566	175	5	1.3559
RSBN1L	6	0.99729	0.99731	1	21509	0	1.2338	0.00048685	0.0025325	0.295566	176	6	1.2338
FAM120A	6	0.99702	0.99707	1	21491	0	1.2582	0.00049521	0.0025817	0.299703	177	5	1.2582
RERGL	6	0.99949	0.9995	1	21623	0	0.95917	0.00051158	0.0026684	0.303538	178	6	0.95917
ABCC5	6	0.98079	0.98094	1	20822	0	1.4732	0.00051574	0.0026848	0.303538	179	5	1.4732
hsa-mir-548ae-1	4	0.99948	0.99947	1	21621	0	1.054	0.00051773	0.0019455	0.263954	180	4	1.054	Active
BMP3	6	0.95831	0.95829	1	20018	0	0.63774	0.00051795	0.0026935	0.303538	181	4	0.63774
SNAP29	6	0.97502	0.97516	1	20588	0	1.2716	0.00052018	0.0027026	0.303538	182	5	1.2716
AZI2	6	0.99702	0.99707	1	21490	0	0.91269	0.00052673	0.0027332	0.303538	183	5	0.91269
DISP2	6	0.72629	0.74364	1	13495	1	0.73806	0.00052729	0.0027368	0.303538	184	4	0.73806
ANO1	6	0.98277	0.98291	1	20898	0	1.2568	0.00052817	0.0027418	0.303538	185	5	1.2568
GPR34	6	0.99822	0.99823	1	21555	0	1.1031	0.00052957	0.0027482	0.303538	186	6	1.1031
SEC23IP	6	0.18697	0.34254	1	5523	1	1.1116	0.00053078	0.0027537	0.303538	187	5	1.1116
PCOLCE	6	0.46592	0.60726	1	9955	2	0.19715	0.00053111	0.0027546	0.303538	188	3	0.19715
IFT74	6	0.99946	0.99946	1	21620	0	0.82268	0.00054345	0.0028148	0.308606	189	6	0.82268
CBFA2T3	6	0.96275	0.96273	1	20167	0	1.2138	0.00055585	0.0028855	0.314767	190	5	1.2138
SND1	6	0.999	0.999	1	21593	0	1.0704	0.00056862	0.0029621	0.32151	191	6	1.0704
hsa-mir-34a	4	0.99943	0.99943	1	21618	0	1.0716	0.00057055	0.0021503	0.27552	192	4	1.0716	Active
NF1	6	0.99555	0.9956	1	21425	0	1.0281	0.00057436	0.0029909	0.32264	193	5	1.0281
GPNMB	6	0.8083	0.80875	1	15363	1	0.018886	0.0005775	0.0030023	0.32264	194	2	0.018886
hsa-mir-548i-4	3	0.71668	0.71652	1	13306	0	0.4779	0.00059008	0.0017129	0.241899	195	2	0.4779	Active
ZNF768	6	0.54616	0.64407	1	10751	1	1.1685	0.00059445	0.0030912	0.330561	196	5	1.1685
POU5F2	6	0.9994	0.99941	1	21617	0	1.105	0.00059859	0.0031095	0.330882	197	6	1.105
MNX1	6	0.6185	0.67926	1	11689	1	1.1881	0.00061387	0.0031861	0.337382	198	5	1.1881
PABPC1L	6	0.68011	0.71386	1	12669	1	1.1986	0.0006253	0.0032413	0.34156	199	5	1.1986
IKBKB	6	0.99936	0.99937	1	21616	0	1.0368	0.00063904	0.003306	0.345942	200	6	1.0368
KIAA1211	6	0.99936	0.99937	1	21615	0	0.81885	0.00064123	0.0033206	0.345942	201	6	0.81885
LRP5L	6	0.57466	0.65733	1	11100	1	1.0674	0.00064368	0.0033307	0.345942	202	5	1.0674
BCL2L14	6	0.99934	0.99935	1	21613	0	0.89724	0.00066359	0.003431	0.354019	203	6	0.89724
GANAB	6	0.99405	0.99408	1	21367	0	1.3154	0.00066607	0.003441	0.354019	204	4	1.3154
STMN3	6	0.76569	0.77257	1	14319	1	1.1801	0.00067004	0.0034638	0.354684	205	4	1.1801
INSL5	6	0.95963	0.95959	1	20054	0	1.1703	0.00070147	0.0036358	0.367096	206	4	1.1703
MTHFR	6	0.99929	0.99931	1	21611	0	1.0561	0.00070575	0.0036559	0.367414	207	6	1.0561
HNRNPK	6	0.34553	0.49044	1	7679	1	1.0747	0.00072367	0.0037535	0.37057	208	5	1.0747
OR5L1	6	0.51173	0.6289	1	10404	1	1.0011	0.00072735	0.0037699	0.37057	209	5	1.0011
LTA4H	6	0.93715	0.93737	1	19299	0	0.96026	0.00072804	0.0037713	0.37057	210	5	0.96026
WDR20	6	0.78235	0.78614	1	14718	1	-0.046725	0.00072811	0.0037713	0.37057	211	1	-0.046725
CD180	6	0.99927	0.99928	1	21610	0	0.69515	0.00072838	0.0037726	0.37057	212	6	0.69515
PEX2	6	0.99844	0.99845	1	21561	0	1.2876	0.00074108	0.003841	0.374217	213	6	1.2876
MICU1	6	0.99926	0.99927	1	21609	0	1.1719	0.00074177	0.0038442	0.374217	214	6	1.1719
FAM117B	6	0.99925	0.99926	1	21608	0	0.89455	0.00074512	0.0038638	0.374235	215	6	0.89455
NUDT5	6	0.7374	0.75145	1	13713	1	1.1724	0.00076247	0.0039459	0.37735	216	5	1.1724
LGALS1	6	0.99922	0.99923	1	21607	0	1.0146	0.00077752	0.0040253	0.379629	217	6	1.0146
PRKACB	6	0.97988	0.98003	1	20791	0	1.4181	0.0007856	0.0040673	0.379629	218	5	1.4181
B3GNT1	6	0.075595	0.17396	1	3537	3	0.46807	0.00078725	0.0040746	0.379629	219	3	0.46807
CCDC124	6	0.74952	0.76028	1	13980	1	0.97786	0.00078946	0.0040855	0.379629	220	3	0.97786
ABCF2	6	0.88179	0.88185	1	17529	0	1.219	0.00079265	0.0041001	0.379629	221	4	1.219
ESCO1	6	0.99201	0.99203	1	21271	0	1.0082	0.00079375	0.0041074	0.379629	222	5	1.0082
PTGIS	6	0.89009	0.8902	1	17770	0	1.1903	0.00079443	0.0041097	0.379629	223	4	1.1903
TLE4	6	0.95819	0.95817	1	20014	0	1.2935	0.00080164	0.0041434	0.380335	224	5	1.2935
PPP1CC	6	0.99858	0.99859	1	21567	0	0.98554	0.0008042	0.0041548	0.380335	225	6	0.98554
RIBC1	6	0.99919	0.99921	1	21606	0	0.68626	0.00080695	0.0041699	0.380335	226	6	0.68626
hsa-mir-1252	3	0.80591	0.80571	1	15298	0	2.4055	0.00080984	0.0023231	0.284919	227	2	2.4055	Active
DGAT2L6	6	0.95101	0.95113	1	19774	0	1.2387	0.00081158	0.0041941	0.38094	228	4	1.2387
C8orf34	6	0.99918	0.99919	1	21604	0	0.82648	0.00082329	0.0042561	0.382655	230	6	0.82648
SPSB1	6	0.99917	0.99919	1	21603	0	0.76784	0.00082518	0.0042675	0.382655	231	6	0.76784
ZSWIM7	6	0.57817	0.65901	1	11142	1	0.29266	0.0008285	0.0042835	0.382655	232	3	0.29266
CAMSAP1	6	0.99916	0.99917	1	21602	0	0.8224	0.00084459	0.0043674	0.387492	233	6	0.8224
CHD1	6	0.999	0.999	1	21594	0	0.99753	0.00084573	0.0043733	0.387492	234	6	0.99753
TOX4	6	0.19093	0.34616	1	5583	1	1.2516	0.00086333	0.0044755	0.392523	236	4	1.2516
YIPF6	6	0.44797	0.58953	1	9572	2	0.3255	0.00087869	0.0045498	0.392523	237	3	0.3255
FUNDC1	6	0.99912	0.99913	1	21599	0	0.57197	0.00087982	0.0045557	0.392523	238	6	0.57197
IKZF5	6	0.084074	0.18804	1	3687	2	0.91817	0.00088012	0.0045567	0.392523	239	4	0.91817
FNDC3B	6	0.99886	0.99885	1	21581	0	1.0253	0.00089074	0.0046159	0.396059	240	6	1.0253
LCE3C	6	0.99909	0.9991	1	21597	0	0.75347	0.00091332	0.004725	0.402233	242	6	0.75347
NME5	6	0.99908	0.99909	1	21596	0	0.80349	0.00092219	0.0047674	0.404258	243	6	0.80349
ATF7	6	0.8072	0.80776	1	15335	1	0.48081	0.00092888	0.0047979	0.404578	244	4	0.48081
MAF1	6	0.93504	0.93524	1	19227	0	1.2037	0.00093086	0.0048084	0.404578	245	4	1.2037
FAM50B	6	0.1724	0.32909	1	5365	1	1.1267	0.00094649	0.0048905	0.408321	246	5	1.1267
hsa-mir-1587	4	0.9911	0.99113	1	21240	0	1.4955	0.00094734	0.0034862	0.355297	247	4	1.4955	Active
RHOC	6	0.82447	0.82435	1	15813	1	0.8339	0.00095488	0.0049311	0.410132	248	5	0.8339
MTCH1	6	0.87073	0.87076	1	17194	0	1.0215	0.00096479	0.0049726	0.41136	249	5	1.0215
CRCT1	6	0.99903	0.99903	1	21595	0	0.9122	0.00097058	0.0050027	0.41136	250	6	0.9122
TBC1D7	6	0.30642	0.45337	1	7069	2	-0.034358	0.00097907	0.0050401	0.412871	251	2	-0.034358
SUSD4	6	0.93085	0.93108	1	19098	0	0.38122	0.00099072	0.0050944	0.414191	252	3	0.38122
FRA10AC1	5	0.99899	0.99901	1	21592	0	0.82646	0.0010066	0.0044896	0.392523	253	5	0.82646
TRMT10B	6	0.92999	0.93022	1	19070	0	0.38368	0.0010293	0.0052782	0.423459	254	3	0.38368
DEGS1	6	0.91654	0.91677	1	18605	0	0.98745	0.001031	0.0052864	0.423459	255	5	0.98745
NCOA5	6	0.99644	0.99647	1	21464	0	1.192	0.0010383	0.0053265	0.424564	256	5	1.192
DYNAP	6	0.99896	0.99896	1	21591	0	1.2724	0.0010416	0.0053393	0.424564	257	6	1.2724
hsa-mir-548aj-2	4	0.99894	0.99895	1	21590	0	1.67	0.0010551	0.0038789	0.374235	258	4	1.67	Active
UBP1	6	0.9916	0.9916	1	21262	0	1.3067	0.0010606	0.0054287	0.430097	259	4	1.3067
hsa-mir-3912	4	0.99893	0.99893	1	21589	0	0.95383	0.0010732	0.0039441	0.37735	260	4	0.95383	Active
HOMER3	6	0.87143	0.87144	1	17215	0	1.1393	0.0010757	0.0055172	0.435518	261	5	1.1393
CHD9	6	0.99883	0.99882	1	21576	0	1.2089	0.001088	0.0055797	0.435522	262	6	1.2089
LOC100288814	6	0.99891	0.99892	1	21588	0	0.67133	0.0010883	0.0055829	0.435522	263	6	0.67133
TSPAN6	6	0.99891	0.99892	1	21587	0	0.86559	0.0010888	0.0055856	0.435522	264	6	0.86559
TAPT1	6	0.86152	0.86144	1	16909	0	0.97189	0.001099	0.0056321	0.435522	265	5	0.97189
FEZF2	6	0.9989	0.9989	1	21586	0	0.70469	0.0010996	0.0056344	0.435522	266	6	0.70469
DDX42	6	0.44263	0.5843	1	9463	2	-0.32713	0.0011014	0.005644	0.435522	267	2	-0.32713
NRGN	6	0.66482	0.70476	1	12415	1	1.0957	0.0011063	0.0056695	0.435522	268	4	1.0957
CATSPER3	6	0.97326	0.9733	1	20542	0	1.1348	0.0011176	0.005727	0.435522	270	5	1.1348
PPP1R37	6	0.99888	0.99888	1	21584	0	0.79853	0.0011178	0.0057279	0.435522	271	6	0.79853
SERPINB10	6	0.99888	0.99888	1	21583	0	0.97144	0.0011179	0.0057284	0.435522	272	6	0.97144
VPS13A	6	0.99888	0.99887	1	21582	0	0.86253	0.0011202	0.0057379	0.435522	273	6	0.86253
SUV420H2	6	0.77216	0.77782	1	14464	1	0.35549	0.0011296	0.005784	0.436864	274	3	0.35549
SMCHD1	6	0.92579	0.92603	1	18921	0	1.2925	0.0011321	0.0057959	0.436864	275	5	1.2925
RNASE10	6	0.99885	0.99884	1	21580	0	0.70422	0.0011543	0.0058953	0.442821	276	6	0.70422
hsa-mir-548av	4	0.99884	0.99884	1	21579	0	1.1336	0.0011591	0.0042584	0.382655	277	4	1.1336	Active
RABGAP1	6	0.98975	0.98981	1	21183	0	0.99888	0.0011642	0.0059432	0.444484	278	5	0.99888
OTUD5	6	0.99057	0.99058	1	21216	0	1.1923	0.0011719	0.0059756	0.444484	279	5	1.1923
TMEM39B	6	0.39134	0.53436	1	8490	2	0.80926	0.001174	0.0059847	0.444484	280	3	0.80926
PVALB	6	0.26056	0.4105	1	6435	2	1.4755	0.0011786	0.0060102	0.444484	281	4	1.4755
PTAFR	6	0.9983	0.99831	1	21560	0	1.0879	0.0011811	0.0060198	0.444484	282	6	1.0879
EXD2	6	0.97927	0.9794	1	20770	0	1.4182	0.0011898	0.0060659	0.446367	283	5	1.4182
FAM47A	6	0.99613	0.99617	1	21447	0	1.1117	0.0012007	0.0061161	0.446712	284	5	1.1117
AKR7A3	6	0.65272	0.69784	1	12204	1	0.60907	0.0012046	0.0061316	0.446712	285	4	0.60907
LOC100130370	6	0.99879	0.99879	1	21575	0	0.82834	0.001205	0.0061325	0.446712	286	6	0.82834
AQP6	6	0.99879	0.99878	1	21574	0	0.88301	0.00121	0.0061598	0.446712	287	6	0.88301
SYN2	6	0.97801	0.97814	1	20707	0	1.1075	0.0012134	0.0061753	0.446712	288	5	1.1075
RELB	6	0.65902	0.70139	1	12302	1	1.1186	0.001217	0.006194	0.446712	289	5	1.1186
NRG2	6	0.94518	0.94531	1	19570	0	1.1775	0.0012275	0.0062419	0.448012	290	4	1.1775
EMC9	6	0.88088	0.88095	1	17505	0	0.46331	0.00123	0.0062533	0.448012	291	3	0.46331
CXCL16	6	0.27571	0.42467	1	6636	2	0.87087	0.0012346	0.0062793	0.448394	292	3	0.87087
ASCC2	6	0.9748	0.97492	1	20583	0	0.94462	0.0012495	0.0063582	0.450269	293	5	0.94462
RASA2	6	0.3339	0.47935	1	7485	1	0.86184	0.0012511	0.0063669	0.450269	294	5	0.86184
hsa-mir-1200	4	0.99858	0.99858	1	21566	0	1.2615	0.0012686	0.0046442	0.396917	296	4	1.2615	Active
DRD2	6	0.63224	0.68649	1	11876	1	0.92203	0.0012802	0.0065074	0.456223	297	5	0.92203
DNAJB4	6	0.37396	0.51756	1	8191	1	0.86777	0.0012879	0.006548	0.456223	298	5	0.86777
TPR	6	0.94073	0.94095	1	19417	0	0.70841	0.0012895	0.0065571	0.456223	299	3	0.70841
HCFC1R1	6	0.99547	0.99553	1	21421	0	0.98924	0.0012983	0.0065982	0.457612	300	5	0.98924
SAFB2	6	0.99869	0.99869	1	21571	0	0.72344	0.0013062	0.0066301	0.458362	301	6	0.72344
GHRL	6	0.71482	0.73597	1	13276	1	1.131	0.0013113	0.0066584	0.45872	302	4	1.131
PIGA	6	0.44298	0.58466	1	9472	1	1.1456	0.0013152	0.0066775	0.45872	303	5	1.1456
hsa-mir-223	4	0.99868	0.99867	1	21570	0	1.1468	0.0013237	0.004839	0.405577	304	4	1.1468	Active
TSHZ1	6	0.292	0.43984	1	6854	1	1.1171	0.001328	0.0067423	0.461708	305	5	1.1171
FAM134A	6	0.99789	0.9979	1	21529	0	1.0851	0.0013453	0.0068248	0.465891	306	6	1.0851
GSE1	6	0.99863	0.99864	1	21569	0	0.8953	0.0013697	0.0069256	0.47129	307	6	0.8953
HSPA4	6	0.12394	0.25289	1	4408	1	-0.26028	0.0013805	0.0069781	0.473166	308	1	-0.26028
RGS4	6	0.65914	0.70147	1	12304	1	1.0057	0.0013847	0.0069968	0.473166	309	5	1.0057
DOM3Z	4	0.31905	0.41838	1	7260	1	0.56676	0.001389	0.0050684	0.413627	310	2	0.56676
GABRP	6	0.96511	0.9651	1	20256	0	0.99308	0.0013936	0.0070383	0.474494	311	4	0.99308
ITGB2	6	0.99858	0.9986	1	21568	0	0.72412	0.0014153	0.0071546	0.479717	312	6	0.72412
MYOD1	6	0.99858	0.99858	1	21565	0	0.7727	0.0014213	0.007181	0.479717	313	6	0.7727
TRAPPC3L	4	0.82919	0.82907	1	15940	0	0.52532	0.0014224	0.0051888	0.420293	314	2	0.52532
C2orf66	6	0.99678	0.99683	1	21483	0	0.94895	0.0014254	0.0071993	0.479717	315	5	0.94895
ITFG1	6	0.72162	0.7405	1	13391	1	0.047683	0.0014307	0.0072276	0.479717	316	2	0.047683
AGPAT4	6	0.98674	0.98679	1	21063	0	1.0164	0.0014348	0.0072476	0.479717	317	5	1.0164
LSM14A	6	0.99012	0.99016	1	21191	0	1.2212	0.0014361	0.0072531	0.479717	318	5	1.2212
ART3	6	0.90221	0.90233	1	18131	0	0.84563	0.0014396	0.0072704	0.479717	319	5	0.84563
F9	6	0.99855	0.99856	1	21564	0	0.86223	0.0014483	0.0073092	0.480813	320	6	0.86223
NACA	6	0.99854	0.99854	1	21563	0	1.1882	0.00146	0.0073603	0.482711	321	6	1.1882
PLA2G5	6	0.99455	0.99458	1	21383	0	1.0209	0.0014806	0.0074602	0.486442	322	5	1.0209
OR5A1	6	0.1666	0.32022	1	5230	3	-0.1253	0.0014809	0.007462	0.486442	323	2	-0.1253
AOC3	6	0.1337	0.26848	1	4602	2	1.2479	0.0014925	0.0075135	0.487971	324	4	1.2479
SPATA7	6	0.78564	0.78894	1	14794	1	1.2173	0.0015044	0.0075696	0.489053	325	5	1.2173
EMC7	6	0.34609	0.49096	1	7693	1	1.1148	0.0015213	0.0076549	0.493096	326	4	1.1148
DDX10	6	0.0027422	0.011509	0.179868	1377	4	-1.2341	0.001531	0.0077024	0.494425	327	2	-1.2341
ZFP91	6	0.93509	0.93529	1	19231	0	1.1572	0.0015377	0.0077347	0.494425	328	5	1.1572
USP45	6	0.99846	0.99847	1	21562	0	0.53169	0.0015404	0.0077503	0.494425	329	6	0.53169
DNAJB3	6	0.69329	0.72191	1	12874	1	1.1291	0.0015435	0.0077667	0.494425	330	4	1.1291
FABP3	6	0.87998	0.88001	1	17478	0	1.2196	0.0015636	0.007857	0.498712	331	5	1.2196
CTDSP1	6	0.68936	0.71948	1	12801	1	1.0967	0.0015782	0.0079395	0.501799	332	5	1.0967
TAGLN	6	0.31018	0.45691	1	7124	2	0.51977	0.0015812	0.0079519	0.501799	333	3	0.51977
C17orf97	6	0.43954	0.58124	1	9400	1	1.3021	0.0016226	0.0081425	0.511489	334	5	1.3021
ADCY9	6	0.95233	0.95245	1	19818	0	1.0916	0.0016243	0.0081525	0.511489	335	5	1.0916
CHMP4C	6	0.86458	0.86453	1	17000	0	0.089881	0.0016313	0.0081858	0.512098	336	2	0.089881
RAB12	6	0.99806	0.99806	1	21540	0	1.0656	0.0016394	0.0082246	0.513045	337	6	1.0656
NAGA	6	0.94055	0.94077	1	19409	0	0.17206	0.0016815	0.0084422	0.521942	338	1	0.17206
C1orf52	6	0.36908	0.51289	1	8091	1	1.1404	0.0016938	0.0085033	0.521942	339	4	1.1404
MBLAC1	6	0.99649	0.99653	1	21468	0	0.87022	0.0016944	0.0085051	0.521942	340	5	0.87022
MBD1	6	0.44196	0.58365	1	9447	1	1.2285	0.0016958	0.0085115	0.521942	341	4	1.2285
ANKRD54	6	0.99827	0.99828	1	21559	0	0.54464	0.0017298	0.0086752	0.528994	342	6	0.54464
SLC4A10	6	0.99826	0.99827	1	21558	0	0.96177	0.0017396	0.0087259	0.530365	343	6	0.96177
NFKBIL1	6	0.7776	0.78219	1	14601	1	0.24688	0.0017453	0.0087555	0.530365	344	3	0.24688
SAMD13	6	0.99282	0.99284	1	21308	0	0.86835	0.0017485	0.008771	0.530365	345	5	0.86835
hsa-mir-876	4	0.99824	0.99825	1	21556	0	1.1481	0.0017635	0.0063678	0.450269	346	4	1.1481	Active
RNASE3	6	0.81304	0.8132	1	15496	1	1.2374	0.0017655	0.0088458	0.533303	347	4	1.2374
GKAP1	6	0.73213	0.74771	1	13615	1	0.057991	0.0017718	0.0088723	0.533303	348	2	0.057991
ZFYVE27	6	0.97367	0.97375	1	20551	0	0.46033	0.0017818	0.0089156	0.533303	349	4	0.46033
CPSF7	6	0.99822	0.99823	1	21554	0	0.72179	0.0017823	0.0089179	0.533303	350	6	0.72179
CSNK2A2	6	0.9982	0.99821	1	21553	0	0.86858	0.001803	0.0090164	0.535359	351	6	0.86858
TAS2R20	6	0.99819	0.9982	1	21551	0	0.58435	0.00181	0.009057	0.535359	353	6	0.58435
CIDEB	6	0.99819	0.9982	1	21550	0	0.6955	0.0018108	0.0090611	0.535359	354	6	0.6955
hsa-mir-3122	4	0.95755	0.95745	1	19989	0	1.2971	0.0018122	0.0065284	0.456223	355	3	1.2971	Active
MAN2C1	6	0.99819	0.9982	1	21549	0	1.0157	0.0018126	0.0090716	0.535359	356	6	1.0157
FGD1	6	0.99819	0.99819	1	21548	0	0.62144	0.001815	0.0090848	0.535359	357	6	0.62144
ABCD1	6	0.99818	0.99819	1	21547	0	0.58827	0.0018194	0.0091076	0.535359	358	6	0.58827
TBPL1	6	0.99817	0.99818	1	21546	0	0.61531	0.001826	0.0091441	0.535359	359	6	0.61531
GPM6B	6	0.99817	0.99818	1	21545	0	0.83322	0.0018278	0.0091532	0.535359	360	6	0.83322
SBF1	6	0.96498	0.96496	1	20252	0	1.0597	0.0018318	0.0091742	0.535359	361	4	1.0597
MLL2	2	0.99817	0.99814	1	21544	0	1.7604	0.001834	0.0035624	0.361363	362	2	1.7604
CASP9	6	0.99815	0.99815	1	21543	0	0.92692	0.0018502	0.0092595	0.538887	363	6	0.92692
OGFOD2	6	0.98416	0.98429	1	20950	0	0.80768	0.0018651	0.0093347	0.54037	364	5	0.80768
EIF4G3	6	0.73781	0.75174	1	13732	1	0.88805	0.0018766	0.0093886	0.54076	365	4	0.88805
NLRP13	6	0.95132	0.95145	1	19784	0	0.88383	0.0018768	0.0093913	0.54076	366	5	0.88383
UBE2D1	6	0.9981	0.99811	1	21542	0	1.0612	0.0018963	0.0094916	0.544799	367	6	1.0612
CCNL1	6	0.99809	0.9981	1	21541	0	0.74589	0.0019118	0.009566	0.544799	368	6	0.74589
NFKB1	6	0.99622	0.99626	1	21457	0	0.82147	0.001912	0.0095664	0.544799	369	5	0.82147
HSBP1L1	6	0.59466	0.66716	1	11373	1	0.65184	0.0019176	0.0095906	0.544799	370	3	0.65184
MAMDC4	6	0.95581	0.95582	1	19929	0	0.5779	0.0019259	0.0096298	0.544799	371	3	0.5779
PPM1J	6	0.98684	0.98689	1	21068	0	0.45818	0.0019323	0.0096622	0.544799	372	4	0.45818
C5orf52	6	0.99805	0.99806	1	21539	0	0.56627	0.001947	0.009732	0.547312	373	6	0.56627
FBXO30	6	0.98077	0.98091	1	20821	0	1.0829	0.0019582	0.0097858	0.54842	374	5	1.0829
PRG3	6	0.99804	0.99804	1	21538	0	1.0898	0.0019611	0.0098022	0.54842	375	6	1.0898
NCKAP5L	6	0.99783	0.99785	1	21528	0	1.1387	0.0019782	0.0098953	0.549038	376	6	1.1387
LGR5	6	0.85598	0.85591	1	16725	0	0.010787	0.0019824	0.0099144	0.549038	377	2	0.010787
OR1A2	6	0.9953	0.99535	1	21414	0	0.86359	0.0019912	0.0099491	0.549555	378	5	0.86359
ZNF547	6	0.37624	0.51974	1	8229	2	-0.13556	0.0020293	0.010132	0.556824	379	2	-0.13556
TMPRSS5	6	0.8514	0.85128	1	16586	0	1.136	0.0020362	0.010161	0.557018	380	4	1.136
ZSCAN16	6	0.99795	0.99796	1	21536	0	0.70008	0.0020519	0.010234	0.558821	381	6	0.70008
OTUB1	6	0.99795	0.99796	1	21535	0	0.9342	0.0020545	0.010246	0.558821	382	6	0.9342
FAM9C	6	0.99794	0.99795	1	21534	0	0.72264	0.0020647	0.010288	0.559592	383	6	0.72264
NNT	6	0.99792	0.99794	1	21533	0	0.86135	0.0020778	0.010349	0.560083	384	6	0.86135
ARF3	6	0.48244	0.61677	1	10156	1	1.0101	0.0020832	0.010372	0.560083	385	5	1.0101
SLC25A29	6	0.96494	0.96493	1	20250	0	1.0753	0.0020895	0.010402	0.56029	386	5	1.0753
KIAA1217	6	0.9979	0.99791	1	21530	0	0.64638	0.0020978	0.010438	0.560864	387	6	0.64638
LAGE3	6	0.015044	0.048507	0.490678	2110	3	-0.66501	0.0021179	0.010527	0.562155	388	2	-0.66501
PRDX3	6	0.5169	0.63117	1	10458	1	0.56912	0.0021208	0.01054	0.562155	389	3	0.56912
APOBEC3H	6	0.86295	0.86289	1	16951	0	1.0292	0.0021356	0.010617	0.564902	390	5	1.0292
PKNOX2	6	0.78855	0.79143	1	14871	1	0.78467	0.0021528	0.010693	0.566561	391	4	0.78467
ITIH4	6	0.79943	0.80072	1	15122	1	1.2028	0.0021559	0.010706	0.566561	392	4	1.2028
MID1	6	0.92893	0.92917	1	19033	0	0.84148	0.0021605	0.010727	0.566561	393	5	0.84148
AGBL4	6	0.71321	0.73489	1	13249	1	1.1894	0.002188	0.010856	0.571986	394	5	1.1894
DTNB	6	0.8569	0.85684	1	16748	0	1.0694	0.0021997	0.010919	0.573555	395	4	1.0694
FBXL16	6	0.3684	0.51223	1	8074	1	0.96525	0.0022163	0.01099	0.573555	396	5	0.96525
SMEK1	6	0.67799	0.71259	1	12627	1	1.1193	0.0022167	0.010991	0.573555	397	5	1.1193
OSTM1	6	0.99484	0.99487	1	21395	0	1.1696	0.0022314	0.011067	0.575122	398	5	1.1696
AP3M1	6	0.68056	0.71413	1	12674	1	0.31618	0.0022331	0.011074	0.575122	399	3	0.31618
CTSO	6	0.88479	0.88482	1	17621	0	1.0353	0.0022461	0.011135	0.575336	400	4	1.0353
MS4A14	6	0.39007	0.53313	1	8469	1	1.1584	0.0022547	0.011172	0.575336	401	4	1.1584
ANKRD46	6	0.99774	0.99777	1	21527	0	0.62531	0.0022613	0.011205	0.575336	402	6	0.62531
OR6C1	6	0.72723	0.74428	1	13523	1	0.97593	0.002272	0.011256	0.575336	403	4	0.97593
LACC1	6	0.64069	0.6911	1	12008	1	0.021686	0.0022833	0.011309	0.575336	404	2	0.021686
AAR2	6	0.99771	0.99775	1	21526	0	0.73483	0.0022852	0.011317	0.575336	405	6	0.73483
hsa-mir-494	4	0.97081	0.97075	1	20457	0	1.3935	0.0022918	0.0082556	0.513504	406	3	1.3935	Active
C9orf24	6	0.97906	0.9792	1	20758	0	0.83032	0.0022962	0.011374	0.575893	407	5	0.83032
CD99_X	6	0.99768	0.99772	1	21525	0	0.80789	0.0023173	0.01147	0.575893	408	6	0.80789
CACHD1	6	0.99768	0.99772	1	21524	0	0.82009	0.0023234	0.011491	0.575893	409	6	0.82009
KLHL24	6	0.99767	0.99771	1	21523	0	0.50508	0.0023266	0.011503	0.575893	410	6	0.50508
CLCC1	6	0.033299	0.096845	0.757859	2721	3	-0.53388	0.0023334	0.011534	0.575893	411	2	-0.53388
ASB3	6	0.99766	0.9977	1	21522	0	0.65155	0.0023414	0.011567	0.575893	412	6	0.65155
TAB3	6	0.99017	0.99021	1	21195	0	1.0465	0.0023517	0.011623	0.575893	413	5	1.0465
CEBPD	6	0.99763	0.99768	1	21521	0	0.86398	0.0023661	0.011695	0.575893	414	6	0.86398
MR1	6	0.99763	0.99767	1	21520	0	0.62267	0.0023693	0.011706	0.575893	415	6	0.62267
TPCN1	6	0.97865	0.97879	1	20736	0	1.0067	0.0023798	0.011755	0.575893	416	5	1.0067
PSG8	6	0.99762	0.99766	1	21519	0	0.98117	0.0023817	0.011761	0.575893	417	6	0.98117
CYP27C1	6	0.58686	0.6633	1	11259	1	0.10419	0.0023835	0.011768	0.575893	418	2	0.10419
KLC2	6	0.99761	0.99765	1	21518	0	0.61642	0.0023886	0.011794	0.575893	419	6	0.61642
ZNF410	6	0.19878	0.35337	1	5676	2	0.08976	0.0023887	0.011794	0.575893	420	3	0.08976
CLGN	6	0.77761	0.7822	1	14602	1	0.83864	0.0023914	0.011805	0.575893	421	5	0.83864
hsa-mir-4753	4	0.80692	0.80681	1	15324	0	0.66779	0.0023921	0.0086032	0.526077	422	3	0.66779	Active
LRRN4	6	0.10363	0.22025	1	4027	3	-0.32412	0.0024337	0.012018	0.583484	423	2	-0.32412
VN1R5	6	0.99754	0.99757	1	21517	0	0.59243	0.0024587	0.01214	0.585644	424	6	0.59243
CDK20	6	0.91975	0.91995	1	18709	0	0.44011	0.0024838	0.012267	0.590347	425	3	0.44011
ASPA	6	0.99751	0.99754	1	21516	0	0.61664	0.0024905	0.012292	0.590347	426	6	0.61664
IL2RG	6	0.99507	0.99511	1	21407	0	0.83052	0.0025034	0.012361	0.592322	427	5	0.83052
HPS6	6	0.64199	0.69181	1	12033	1	1.2362	0.0025085	0.012388	0.592347	428	4	1.2362
TAGLN3	6	0.98189	0.98205	1	20862	0	1.2632	0.0025163	0.012433	0.593156	429	4	1.2632
TMEM216	6	0.76429	0.77146	1	14285	1	0.36562	0.0025339	0.012528	0.596415	430	3	0.36562
NTMT1	6	0.99743	0.99745	1	21515	0	0.5174	0.0025693	0.012698	0.596782	431	6	0.5174
MAMLD1	6	0.72426	0.74227	1	13445	1	0.77952	0.0025725	0.012711	0.596782	432	5	0.77952
GABRA6	6	0.95747	0.95746	1	19987	0	0.72577	0.0025804	0.01275	0.596782	433	5	0.72577
DNTT	6	0.99742	0.99744	1	21514	0	0.59136	0.0025815	0.012753	0.596782	434	6	0.59136
OR1L6	6	0.91464	0.91483	1	18545	0	1.0454	0.002582	0.012755	0.596782	435	4	1.0454
DGCR6	6	0.9123	0.91251	1	18472	0	0.38583	0.002584	0.012767	0.596782	436	2	0.38583
INADL	6	0.61014	0.67492	1	11577	1	0.89262	0.0025846	0.012772	0.596782	437	5	0.89262
C16orf52	6	0.96109	0.96107	1	20101	0	0.99657	0.0025913	0.012804	0.596782	438	4	0.99657
MEP1A	6	0.9974	0.99742	1	21513	0	0.68512	0.0026023	0.012851	0.596782	439	6	0.68512
APH1A	6	0.89827	0.8984	1	18006	0	1.0177	0.0026104	0.012894	0.596782	440	4	1.0177
ZFP92	6	0.92073	0.92096	1	18746	0	0.83288	0.0026109	0.012896	0.596782	441	4	0.83288
CCNJL	6	0.99739	0.99741	1	21512	0	0.58882	0.0026111	0.012898	0.596782	442	6	0.58882
USP20	6	0.9942	0.99423	1	21370	0	0.79053	0.0026189	0.012937	0.596782	443	5	0.79053
CASK	6	0.98153	0.98168	1	20845	0	0.84169	0.0026301	0.012987	0.596791	444	5	0.84169
PPIF	6	0.97549	0.97562	1	20611	0	0.89686	0.0026341	0.013004	0.596791	445	5	0.89686
hsa-mir-152	4	0.84652	0.84627	1	16439	0	1.4792	0.0026581	0.0095163	0.544799	446	3	1.4792	Active
VSIG1	6	0.99734	0.99736	1	21511	0	0.7219	0.0026588	0.013117	0.598088	447	6	0.7219
CCL19	6	0.75489	0.76424	1	14088	1	1.0515	0.0026608	0.013127	0.598088	448	4	1.0515
GNAS	6	0.75568	0.76484	1	14110	1	0.80299	0.0026702	0.013167	0.598088	449	5	0.80299
C3orf22	6	0.99733	0.99735	1	21510	0	0.70092	0.0026707	0.01317	0.598088	450	6	0.70092
ZMYM5	6	0.50601	0.62652	1	10352	1	0.27657	0.0026843	0.013238	0.599961	451	2	0.27657
MBNL2	6	0.96523	0.96521	1	20260	0	0.54592	0.0027108	0.013364	0.601666	452	3	0.54592
HELT	6	0.99438	0.99441	1	21375	0	0.78792	0.0027156	0.013383	0.601666	453	5	0.78792
HSPA6	6	0.99727	0.9973	1	21507	0	0.54658	0.0027262	0.013428	0.601666	454	6	0.54658
LY6G6D	6	0.99727	0.9973	1	21506	0	0.58376	0.0027273	0.013431	0.601666	455	6	0.58376
NFIL3	6	0.65015	0.69637	1	12165	1	0.75689	0.0027344	0.01346	0.601666	456	4	0.75689
OSBPL3	6	0.99725	0.99728	1	21505	0	0.64189	0.0027476	0.013523	0.601666	457	6	0.64189
DEFB126	6	0.93593	0.93612	1	19261	0	1.2169	0.0027521	0.013546	0.601666	458	4	1.2169
MSANTD3	6	0.99723	0.99727	1	21504	0	0.52774	0.0027675	0.013606	0.601666	459	6	0.52774
PLA2G12A	6	0.99723	0.99727	1	21503	0	0.63025	0.0027694	0.013614	0.601666	460	6	0.63025
PRR23C	6	0.9892	0.98924	1	21163	0	1.0405	0.0027729	0.013625	0.601666	461	5	1.0405
hsa-mir-1911	4	0.61301	0.61883	1	11610	1	1.3657	0.0027744	0.0099126	0.549038	462	3	1.3657	Active
TMEM253	6	0.93432	0.93456	1	19200	0	0.80409	0.0027823	0.01367	0.601666	463	5	0.80409
SAPCD2	6	0.37062	0.51434	1	8123	1	0.82363	0.0027845	0.01368	0.601666	464	5	0.82363
SMPD4	6	0.68912	0.71933	1	12796	1	1.148	0.0027879	0.013691	0.601666	465	5	1.148
MLL3	4	0.97034	0.97027	1	20444	0	1.5182	0.0027975	0.0099947	0.550673	466	3	1.5182
ZNF510	6	0.9972	0.99724	1	21502	0	0.57155	0.0028022	0.013759	0.60341	467	6	0.57155
RORA	6	0.99717	0.9972	1	21501	0	0.5655	0.0028339	0.01391	0.605892	468	6	0.5655
FIS1	6	0.31011	0.45684	1	7123	2	-0.12222	0.0028346	0.013912	0.605892	469	2	-0.12222
SERPINE3	6	0.99715	0.99719	1	21500	0	0.52845	0.002846	0.013959	0.605892	470	6	0.52845
CIZ1	6	0.3918	0.53482	1	8500	1	0.9568	0.0028462	0.013959	0.605892	471	5	0.9568
BCO2	6	0.93685	0.93708	1	19292	0	1.0555	0.0028593	0.014002	0.605892	472	4	1.0555
PRDX4	6	0.98249	0.98265	1	20886	0	0.75335	0.0028618	0.014015	0.605892	473	5	0.75335
TRPC1	6	0.98973	0.98979	1	21181	0	0.86682	0.0028775	0.014067	0.605892	474	5	0.86682
DIS3L2	6	0.99538	0.99543	1	21417	0	0.78007	0.0028801	0.014076	0.605892	475	5	0.78007
TMEM87A	6	0.85133	0.85121	1	16585	0	0.32952	0.0028847	0.014095	0.605892	476	2	0.32952
DACT2	6	0.98261	0.98276	1	20891	0	0.84846	0.0028953	0.014132	0.606279	477	5	0.84846
CCDC41	6	0.63005	0.6853	1	11848	1	0.75674	0.0029282	0.014255	0.610356	478	5	0.75674
SERP2	6	0.1192	0.24536	1	4307	2	0.2118	0.0029348	0.014284	0.610382	479	3	0.2118
ANKRD12	6	0.94237	0.94257	1	19475	0	0.98473	0.0029519	0.014344	0.611731	480	5	0.98473
CXCL12	6	0.95024	0.95036	1	19745	0	1.082	0.0029596	0.014375	0.611871	481	4	1.082
GABRG1	6	0.91018	0.91032	1	18405	0	0.18858	0.0029849	0.014476	0.613118	482	2	0.18858
C19orf21	6	0.88776	0.88781	1	17706	0	0.44336	0.003035	0.014667	0.616131	483	3	0.44336
NEXN	6	0.32927	0.47495	1	7417	1	0.84251	0.0030355	0.014668	0.616131	484	4	0.84251
SLC13A3	6	0.83357	0.83343	1	16070	0	0.79297	0.0030378	0.014674	0.616131	485	5	0.79297
MRRF	6	0.090068	0.19798	1	3796	2	0.54468	0.0030851	0.014862	0.620428	486	3	0.54468
CORO1C	6	0.97502	0.97515	1	20587	0	0.79684	0.003096	0.014909	0.620428	487	5	0.79684
SYTL5	6	0.52576	0.63502	1	10551	1	0.73441	0.0031095	0.014956	0.620428	488	5	0.73441
DZIP1	6	0.46098	0.60235	1	9851	2	0.67335	0.0031268	0.015023	0.620428	489	3	0.67335
TADA2A	6	0.99303	0.99307	1	21316	0	0.90488	0.0031317	0.015045	0.620428	490	5	0.90488
ATOH1	6	0.51649	0.63099	1	10453	1	0.45848	0.0031352	0.015056	0.620428	491	3	0.45848
RBM45	6	0.78177	0.78569	1	14705	1	0.79193	0.0031376	0.015062	0.620428	492	5	0.79193
DEPDC1	6	0.94132	0.94157	1	19443	0	1.0142	0.0031481	0.015096	0.62064	493	5	1.0142
CCT6B	6	0.94092	0.94113	1	19428	0	1.0692	0.0031616	0.015147	0.621563	494	5	1.0692
RNF20	6	0.25159	0.40192	1	6307	1	1.1112	0.003171	0.015186	0.621929	495	4	1.1112
GALNT14	6	0.89854	0.89866	1	18020	0	0.76907	0.0031853	0.015234	0.621929	496	4	0.76907
SIPA1L2	6	0.67174	0.70887	1	12519	1	0.95505	0.0031879	0.015242	0.621929	497	5	0.95505
hsa-mir-548s	4	0.99678	0.99679	1	21482	0	0.79962	0.0032239	0.011467	0.575893	498	4	0.79962	Active
CXorf48	6	0.94199	0.9422	1	19464	0	0.74795	0.0032306	0.015398	0.626571	499	4	0.74795
NBR1	6	0.37854	0.52197	1	8268	1	1.0388	0.0032354	0.015413	0.626571	500	5	1.0388
CCNI	6	0.034877	0.10084	0.775421	2772	4	-0.6985	0.0032855	0.015584	0.63234	501	1	-0.6985
PCTP	6	0.97693	0.97706	1	20671	0	1.0779	0.0033062	0.01566	0.634227	502	5	1.0779
PRPS1L1	6	0.53515	0.63917	1	10637	1	0.76562	0.0033221	0.015721	0.634464	503	5	0.76562
HPCAL4	6	0.71692	0.73736	1	13312	1	0.22717	0.0033356	0.015764	0.634903	504	3	0.22717
NOMO3	2	0.99666	0.99665	1	21475	0	1.5297	0.0033381	0.0065028	0.456223	505	2	1.5297
TRAPPC2L	6	0.90827	0.90841	1	18339	0	0.98058	0.0033485	0.015813	0.635689	506	4	0.98058
CLEC17A	6	0.38477	0.52796	1	8382	2	1.0082	0.0033616	0.015865	0.635792	507	4	1.0082
PRKCSH	6	0.73779	0.75173	1	13731	1	1.0568	0.0033646	0.015874	0.635792	508	4	1.0568
hsa-mir-649	4	0.99663	0.99664	1	21474	0	1.182	0.003369	0.011954	0.581839	509	4	1.182	Active
ZNF620	6	0.77576	0.78067	1	14551	1	0.889	0.0033829	0.015938	0.636216	510	4	0.889
NOL3	6	0.89334	0.89351	1	17871	0	0.53014	0.0033857	0.015953	0.636216	511	4	0.53014
FAM86A	5	0.81899	0.81913	1	15657	0	0.68372	0.0033909	0.014412	0.612224	512	3	0.68372
SLCO4A1	6	0.86642	0.86641	1	17059	0	1.1973	0.0033913	0.015973	0.636216	513	4	1.1973
hsa-mir-561	4	0.46635	0.50819	1	9964	1	0.0024533	0.0033945	0.012042	0.583484	514	1	0.0024533	Active
LPO	6	0.95323	0.95333	1	19847	0	1.0841	0.0033991	0.016003	0.636266	515	4	1.0841
GLB1L3	5	0.86605	0.86602	1	17047	0	1.2307	0.0034075	0.014489	0.613118	516	3	1.2307
hsa-mir-5700	4	0.9476	0.94746	1	19638	0	1.3944	0.0034125	0.012106	0.585272	517	3	1.3944	Active
ANXA4	6	0.99388	0.99391	1	21355	0	0.9245	0.0034829	0.016317	0.64352	518	5	0.9245
NPEPL1	6	0.72505	0.74278	1	13470	1	0.20297	0.0034859	0.016326	0.64352	519	2	0.20297
CHMP2B	6	0.98412	0.98424	1	20948	0	0.80884	0.0035178	0.01644	0.64352	520	5	0.80884
SHE	6	0.9888	0.98887	1	21148	0	0.83149	0.0035303	0.016482	0.64352	521	5	0.83149
LPCAT3	6	0.87954	0.87957	1	17458	0	1.0216	0.0035356	0.016503	0.64352	522	5	1.0216
HBE1	6	0.90657	0.9067	1	18279	0	0.64906	0.003536	0.016506	0.64352	523	4	0.64906
hsa-mir-7844	4	0.99016	0.99017	1	21193	0	1.2867	0.0035495	0.012581	0.596782	524	4	1.2867	Active
SAMD10	6	0.91949	0.91969	1	18699	0	1.0845	0.0035886	0.016699	0.648294	525	5	1.0845
CCDC170	6	0.9919	0.9919	1	21269	0	1.0887	0.0035961	0.016724	0.648294	526	4	1.0887
SRCIN1	6	0.85942	0.85935	1	16828	0	0.12188	0.0036361	0.016867	0.648815	527	3	0.12188
GIPC2	6	0.68465	0.71657	1	12729	1	0.91401	0.0036424	0.016886	0.648815	528	5	0.91401
NSD1	6	0.84449	0.84438	1	16389	0	0.94656	0.0036475	0.016903	0.648815	529	4	0.94656
SKAP2	6	0.99089	0.99089	1	21229	0	1.1408	0.0036528	0.01692	0.648815	530	5	1.1408
hsa-mir-514b	4	0.90415	0.90397	1	18195	0	1.227	0.0036579	0.012948	0.596782	531	3	1.227	Active
KLF13	6	0.94827	0.94841	1	19670	0	1.1878	0.0036597	0.016941	0.648815	532	5	1.1878
POU1F1	6	0.55249	0.64692	1	10814	1	1.0191	0.0036623	0.016953	0.648815	533	5	1.0191
hsa-mir-4471	4	0.99632	0.99631	1	21459	0	0.76333	0.0036833	0.013032	0.596827	534	4	0.76333	Active
IGFL2	6	0.27207	0.42124	1	6586	1	0.30248	0.0036862	0.01705	0.648815	535	2	0.30248
TMEM14E	6	0.95183	0.95196	1	19803	0	0.82709	0.0036964	0.017089	0.648815	536	5	0.82709
C15orf39	6	0.78778	0.79075	1	14855	1	0.96548	0.0037	0.017101	0.648815	537	4	0.96548
CMSS1	6	0.50234	0.62496	1	10319	1	1.0333	0.0037036	0.017113	0.648815	538	4	1.0333
BIK	6	0.618	0.67898	1	11678	1	1.1305	0.0037044	0.017117	0.648815	539	4	1.1305
DPY19L3	6	0.76485	0.77189	1	14302	1	1.0801	0.0037245	0.017193	0.648815	540	4	1.0801
OSTF1	6	0.9732	0.97325	1	20541	0	1.0931	0.0037291	0.017212	0.648815	541	5	1.0931
ADSSL1	6	0.31958	0.46582	1	7268	2	0.37967	0.0037363	0.017234	0.648815	542	3	0.37967
IL13RA1	6	0.94687	0.94699	1	19621	0	0.95088	0.0037451	0.017266	0.648815	543	5	0.95088
UNG	6	0.31055	0.45728	1	7131	2	0.30214	0.0037482	0.017275	0.648815	544	3	0.30214
hsa-mir-8065	4	0.92449	0.92442	1	18878	0	1.3535	0.0037557	0.013291	0.601104	545	3	1.3535	Active
CAPZA3	6	0.99335	0.99338	1	21334	0	0.90318	0.0037694	0.017356	0.650279	546	4	0.90318
CASZ1	6	0.57066	0.6554	1	11045	1	0.23078	0.0037863	0.017417	0.650279	547	2	0.23078
SUMO4	6	0.99335	0.99338	1	21335	0	0.68143	0.0038094	0.017508	0.650279	548	5	0.68143
XXYLT1	6	0.85471	0.8546	1	16693	0	0.57363	0.0038208	0.017544	0.650279	549	4	0.57363
OR6K6	6	0.86378	0.86373	1	16977	0	0.91833	0.0038283	0.017565	0.650279	550	4	0.91833
FAM166A	6	0.68773	0.71846	1	12780	1	-0.18111	0.0038364	0.017602	0.650279	551	1	-0.18111
OR5H2	6	0.99705	0.9971	1	21493	0	0.68979	0.0038449	0.017636	0.650279	552	5	0.68979
LANCL3	6	0.37634	0.51984	1	8230	1	1.1376	0.00385	0.017654	0.650279	553	5	1.1376
ABCA10	6	0.99448	0.99451	1	21379	0	0.76124	0.0038513	0.017657	0.650279	554	5	0.76124
EDC4	6	0.78256	0.78633	1	14721	1	0.10176	0.0038708	0.017724	0.650279	555	2	0.10176
TUBAL3	6	0.96115	0.96114	1	20106	0	0.83017	0.0038736	0.017734	0.650279	556	5	0.83017
hsa-mir-4636	4	0.99612	0.99611	1	21446	0	0.95674	0.0038773	0.013692	0.601666	557	4	0.95674	Active
CD40LG	6	0.99126	0.99127	1	21248	0	0.72476	0.0038865	0.017783	0.650907	558	5	0.72476
RBMXL2	6	0.9962	0.99625	1	21452	0	1.1766	0.0038955	0.017811	0.650907	559	5	1.1766
OR1L4	6	0.59456	0.66712	1	11372	1	0.70018	0.0039122	0.017876	0.650924	560	5	0.70018
RSBN1	6	0.94301	0.94319	1	19494	0	0.99681	0.0039185	0.017901	0.650924	561	5	0.99681
PDLIM5	6	0.98756	0.98761	1	21096	0	0.76383	0.0039277	0.017931	0.650924	562	5	0.76383
PHIP	6	0.80754	0.80806	1	15342	1	1.0409	0.0039449	0.017997	0.652217	563	5	1.0409
NEUROG3	6	0.9669	0.96689	1	20318	0	0.78897	0.0039751	0.018114	0.654124	564	5	0.78897
C1orf229	6	0.92854	0.92877	1	19014	0	0.28898	0.0039866	0.018155	0.654124	565	2	0.28898
CTSW	6	0.82843	0.82834	1	15922	0	1.0407	0.0040039	0.018211	0.654124	566	4	1.0407
NOX5	6	0.20055	0.355	1	5693	2	0.73003	0.0040164	0.018256	0.654124	567	3	0.73003
YY2	6	0.50503	0.6261	1	10341	1	1.1036	0.0040182	0.018262	0.654124	568	4	1.1036
OR3A2	6	0.95854	0.95852	1	20026	0	0.26274	0.0040367	0.01832	0.654124	569	1	0.26274
GINM1	6	0.98658	0.98664	1	21058	0	1.0001	0.0040729	0.018458	0.656866	571	5	1.0001
TRERF1	6	0.19909	0.35364	1	5680	1	0.40991	0.0040867	0.018505	0.65746	572	4	0.40991
FGFR3	6	0.96905	0.96904	1	20400	0	0.19846	0.0041368	0.018677	0.661423	573	2	0.19846
ENTPD6	6	0.76549	0.77241	1	14313	1	1.0354	0.0041396	0.018689	0.661423	574	4	1.0354
PLCD3	6	0.33849	0.48368	1	7560	2	1.201	0.0041437	0.018708	0.661423	575	4	1.201
C1QC	6	0.99107	0.9911	1	21236	0	1.1472	0.00417	0.018813	0.662255	576	4	1.1472
HDAC1	6	0.99712	0.99717	1	21498	0	1.0597	0.0041836	0.01886	0.662255	577	5	1.0597
SLC41A3	6	0.96448	0.96447	1	20234	0	0.60542	0.0041854	0.018866	0.662255	578	4	0.60542
RNMTL1	6	0.025938	0.077803	0.666307	2482	4	-0.556	0.0041868	0.018874	0.662255	579	1	-0.556
DBN1	6	0.42797	0.56985	1	9172	1	1.1426	0.0041906	0.018884	0.662255	580	4	1.1426
hsa-mir-613	4	0.19296	0.29968	1	5603	1	0.25116	0.0041959	0.014767	0.61886	581	2	0.25116	Active
ZMAT1	6	0.98471	0.98482	1	20977	0	0.75983	0.0042117	0.018962	0.662753	582	3	0.75983
LOC100506688	6	0.96486	0.96485	1	20248	0	1.0444	0.0042142	0.01897	0.662753	583	5	1.0444
SMARCC2	6	0.99541	0.99547	1	21420	0	0.95404	0.0042195	0.01899	0.662753	584	4	0.95404
SPA17	6	0.97144	0.97147	1	20479	0	0.26863	0.0042369	0.019043	0.663168	585	2	0.26863
CRHR1	6	0.97277	0.9728	1	20527	0	1.0981	0.0042437	0.019076	0.663168	586	4	1.0981
C1orf35	6	0.94808	0.94822	1	19659	0	0.89304	0.0042473	0.019093	0.663168	587	5	0.89304
hsa-mir-432	4	0.99575	0.99573	1	21436	0	0.71539	0.0042506	0.01495	0.620428	588	4	0.71539	Active
hsa-mir-151b	4	0.53001	0.553	1	10594	1	1.1589	0.0042704	0.015011	0.620428	589	3	1.1589	Active
CAPN8	5	0.83809	0.83806	1	16198	0	1.304	0.0042745	0.01793	0.650924	590	4	1.304
IDH1	6	0.94337	0.94354	1	19505	0	0.26705	0.0042862	0.019248	0.665455	591	2	0.26705
GNRHR	6	0.61495	0.67738	1	11638	1	1.0373	0.0042876	0.019251	0.665455	592	4	1.0373
OR2S2	6	0.7151	0.73616	1	13281	1	0.6855	0.0043157	0.019354	0.66617	593	3	0.6855
RGL3	6	0.7821	0.78594	1	14714	1	0.80849	0.0043239	0.019382	0.66617	594	3	0.80849
IGHMBP2	6	0.99556	0.99561	1	21426	0	0.98695	0.0043354	0.019417	0.66617	595	5	0.98695
AP5B1	6	0.33658	0.48188	1	7527	2	0.17899	0.004337	0.019425	0.66617	596	3	0.17899
ACAP2	6	0.64268	0.69217	1	12048	1	0.94118	0.0043379	0.019429	0.66617	597	5	0.94118
FBXL20	6	0.96316	0.96314	1	20186	0	0.70233	0.0043449	0.019456	0.66617	598	5	0.70233
APOBR	6	0.99674	0.99678	1	21480	0	0.84994	0.0043687	0.019549	0.668301	599	5	0.84994
PLXDC1	6	0.81307	0.81324	1	15497	1	0.13756	0.004387	0.019619	0.669178	600	2	0.13756
MST4	6	0.80266	0.8036	1	15216	1	0.82522	0.0044363	0.019798	0.669862	601	4	0.82522
NDUFB1	6	0.018414	0.057661	0.552918	2236	3	-0.7665	0.0044371	0.019799	0.669862	602	2	-0.7665
TMEM201	6	0.46729	0.6086	1	9986	1	0.92439	0.0044413	0.019815	0.669862	603	4	0.92439
HECW1	6	0.77492	0.78001	1	14530	1	0.78972	0.0044463	0.019835	0.669862	604	3	0.78972
ARHGAP5	6	0.98561	0.98573	1	21011	0	0.89013	0.0044843	0.019976	0.6723	605	5	0.89013
MAPK6	6	0.18849	0.34393	1	5541	1	0.198	0.0045372	0.020164	0.673627	606	2	0.198
COL4A1	6	0.88234	0.88239	1	17542	0	0.96406	0.0045739	0.020287	0.673627	607	5	0.96406
hsa-mir-548a-1	4	0.77786	0.77775	1	14607	0	1.3883	0.0045762	0.016034	0.636315	608	3	1.3883	Active
DTWD1	6	0.94971	0.94981	1	19721	0	0.23572	0.0045872	0.020343	0.673627	609	2	0.23572
MAP4K3	6	0.99549	0.99555	1	21422	0	0.93183	0.0045907	0.020352	0.673627	610	5	0.93183
hsa-mir-4328	4	0.61105	0.61715	1	11588	1	1.0044	0.0045938	0.016098	0.637701	612	3	1.0044	Active
ALPK2	6	0.9408	0.94103	1	19421	0	1.0475	0.0046082	0.02041	0.673627	613	5	1.0475
ELAVL2	6	0.70739	0.73104	1	13150	1	0.79719	0.0046372	0.020521	0.673627	615	4	0.79719
SOCS5	6	0.80474	0.80547	1	15269	1	0.84605	0.0046435	0.02055	0.673627	616	5	0.84605
UBC	6	0.98812	0.98819	1	21117	0	0.80511	0.0046538	0.02059	0.673627	617	5	0.80511
GPATCH2L	6	0.55231	0.64684	1	10811	1	0.089782	0.0046624	0.02062	0.673627	618	2	0.089782
ARHGAP36	6	0.74766	0.75893	1	13934	1	0.75908	0.0046626	0.02062	0.673627	619	5	0.75908
EOGT	6	0.9013	0.90138	1	18105	0	0.26149	0.0046873	0.020715	0.673627	620	2	0.26149
SPEF2	6	0.94376	0.94392	1	19522	0	0.93259	0.0046958	0.020739	0.673627	621	5	0.93259
GABRB3	6	0.98704	0.98708	1	21078	0	0.88354	0.0046988	0.02075	0.673627	622	5	0.88354
FRMD4A	6	0.99649	0.99653	1	21467	0	0.8745	0.0047049	0.020772	0.673627	623	5	0.8745
ARHGEF6	6	0.90232	0.90244	1	18134	0	0.3994	0.0047131	0.020809	0.673627	624	3	0.3994
TESK1	6	0.94579	0.94593	1	19584	0	0.76978	0.0047252	0.020857	0.673627	625	3	0.76978
TCP11L2	6	0.98696	0.98701	1	21073	0	0.87434	0.0047301	0.020878	0.673627	626	5	0.87434
HFM1	6	0.79383	0.79591	1	14990	1	1.1433	0.0047322	0.020884	0.673627	627	4	1.1433
ZNF354B	6	0.73761	0.7516	1	13724	1	0.10773	0.0047373	0.020898	0.673627	628	1	0.10773
CLINT1	6	0.23791	0.38923	1	6136	2	0.64451	0.0047426	0.020913	0.673627	629	3	0.64451
FABP1	6	0.3529	0.49744	1	7800	1	0.95381	0.0047438	0.020915	0.673627	630	5	0.95381
MSS51	6	0.84718	0.84705	1	16463	0	0.70475	0.0047564	0.020962	0.67414	631	5	0.70475
LGSN	6	0.68075	0.71424	1	12676	1	0.88971	0.004768	0.021009	0.674189	632	5	0.88971
DTX3L	6	0.73551	0.75009	1	13676	1	0.93924	0.0047764	0.021035	0.674189	633	4	0.93924
IGF2	6	0.771	0.77688	1	14438	1	0.12344	0.0047873	0.021067	0.674189	634	2	0.12344
C1orf174	6	0.95631	0.95632	1	19946	0	0.81823	0.0048054	0.021142	0.674189	635	3	0.81823
TMC6	6	0.98359	0.9837	1	20928	0	0.89698	0.0048061	0.021145	0.674189	636	5	0.89698
KCNK17	6	0.96535	0.96534	1	20266	0	1.0128	0.0048099	0.021157	0.674189	637	5	1.0128
ZFPM1	6	0.70233	0.72774	1	13041	1	1.0622	0.0048167	0.021181	0.674189	638	5	1.0622
F2RL2	6	0.98393	0.98403	1	20940	0	1.1027	0.0048353	0.021253	0.675272	639	5	1.1027
SULF2	6	0.99123	0.99124	1	21247	0	1.0997	0.0048426	0.021277	0.675272	640	5	1.0997
SPIN3	6	0.99243	0.99245	1	21290	0	0.84393	0.004883	0.021419	0.676156	641	5	0.84393
USP6	6	0.35283	0.49738	1	7799	1	0.30768	0.0049057	0.021501	0.676156	642	3	0.30768
hsa-mir-3609	4	0.98541	0.98541	1	21004	0	1.3096	0.0049181	0.017219	0.648815	643	4	1.3096	Active
KCND1	6	0.99515	0.99519	1	21410	0	0.95311	0.0049206	0.021548	0.676156	644	5	0.95311
PI4K2B	6	0.96113	0.96112	1	20104	0	0.36342	0.0049273	0.021578	0.676156	645	3	0.36342
NIPAL4	6	0.92392	0.92411	1	18854	0	0.73983	0.0049314	0.021591	0.676156	646	5	0.73983
EMC8	6	0.97957	0.97971	1	20778	0	0.81625	0.0049368	0.021612	0.676156	647	5	0.81625
DPY30	6	0.026897	0.080293	0.677944	2518	3	-0.6074	0.0049374	0.021617	0.676156	648	2	-0.6074
KLF8	6	0.98406	0.98417	1	20947	0	0.94717	0.0049534	0.021671	0.676893	649	5	0.94717
hsa-mir-518a-2	3	0.99497	0.99506	1	21401	0	0.90185	0.005032	0.013848	0.605892	650	3	0.90185	Active
KRBOX4	6	0.74196	0.75475	1	13820	1	0.90742	0.0050372	0.021983	0.684884	651	5	0.90742
ZNF280B	6	0.7801	0.78428	1	14657	1	1.0072	0.0050511	0.02203	0.684884	652	4	1.0072
hsa-mir-335	4	0.99495	0.99495	1	21400	0	0.95736	0.0050534	0.017654	0.650279	653	4	0.95736	Active
TBC1D3H	1	0.99493	0.99496	1	21398	0	3.5402	0.005069	0.0049982	0.41136	654	1	3.5402
PPIC	6	0.92865	0.92889	1	19019	0	0.83737	0.0050734	0.02211	0.684884	655	5	0.83737
C1orf141	6	0.93118	0.9314	1	19105	0	0.31646	0.0050756	0.022116	0.684884	656	3	0.31646
ARID1B	6	0.98875	0.98882	1	21143	0	0.97556	0.0050842	0.022152	0.685009	657	4	0.97556
KIAA0556	6	0.67933	0.71339	1	12656	1	0.73266	0.0051108	0.022235	0.686612	658	4	0.73266
PEG10	6	0.83935	0.83926	1	16230	0	0.47252	0.0051284	0.022306	0.686841	659	3	0.47252
ARG1	6	0.96102	0.96101	1	20097	0	0.90191	0.0051416	0.022357	0.687439	660	5	0.90191
CDH20	6	0.81289	0.81305	1	15491	1	0.30038	0.0051875	0.022523	0.688347	661	2	0.30038
HNF1B	6	0.96278	0.96276	1	20169	0	0.86931	0.0052064	0.02259	0.688347	662	5	0.86931
UTS2R	6	0.97295	0.97299	1	20534	0	0.90345	0.00521	0.0226	0.688347	663	4	0.90345
KIAA0513	6	0.90627	0.90639	1	18266	0	1.1242	0.0052104	0.022602	0.688347	664	5	1.1242
TEC	6	0.9875	0.98755	1	21094	0	0.8162	0.0052257	0.022654	0.688347	665	5	0.8162
RNF32	6	0.35664	0.50096	1	7853	2	0.74484	0.0052375	0.022689	0.688347	666	4	0.74484
hsa-mir-4718	4	0.99401	0.99405	1	21363	0	1.4253	0.0052613	0.01834	0.654124	667	4	1.4253	Active
AKAP2	6	0.65558	0.69945	1	12238	1	0.050295	0.0052875	0.022854	0.690652	668	2	0.050295
C5orf30	6	0.79956	0.80084	1	15125	1	0.77743	0.0052996	0.022902	0.690652	669	5	0.77743
CPNE2	6	0.61525	0.67754	1	11645	1	0.85344	0.0053108	0.022936	0.690652	670	5	0.85344
CDC42EP3	6	0.93538	0.93559	1	19244	0	0.95318	0.0053141	0.022948	0.690652	671	4	0.95318
C1orf227	6	0.8925	0.89264	1	17852	0	0.4589	0.0053332	0.023011	0.690652	673	3	0.4589
SCN1A	6	0.94938	0.9495	1	19709	0	0.011684	0.0053375	0.023021	0.690652	674	2	0.011684
LOC154872	6	0.87037	0.87039	1	17184	0	0.76302	0.0053446	0.02305	0.690652	675	5	0.76302
RPS6KA6	6	0.99553	0.99558	1	21424	0	0.99002	0.0053517	0.023078	0.690652	676	4	0.99002
DVL3	6	0.90784	0.90797	1	18326	0	0.98121	0.0053642	0.023128	0.690652	677	4	0.98121
GPR137B	6	0.9766	0.97673	1	20656	0	0.60287	0.0053648	0.02313	0.690652	678	5	0.60287
MSRB3	6	0.92096	0.92117	1	18753	0	1.0347	0.0054173	0.02333	0.695026	679	4	1.0347
HOXC11	6	0.90098	0.90107	1	18093	0	0.89657	0.0054302	0.023372	0.695026	680	4	0.89657
HEY2	6	0.71737	0.73766	1	13319	1	0.9108	0.0054359	0.023396	0.695026	681	4	0.9108
HSPA1A	6	0.97662	0.97675	1	20658	0	0.45708	0.0054375	0.023404	0.695026	682	3	0.45708
SMIM4	6	0.9962	0.99624	1	21451	0	0.88418	0.0054463	0.023437	0.695051	683	5	0.88418
GIMAP7	6	0.92666	0.9269	1	18952	0	0.29494	0.0054689	0.023521	0.695078	684	2	0.29494
MMP1	6	0.93767	0.93791	1	19316	0	0.99301	0.0054694	0.023524	0.695078	685	4	0.99301
TMEM2	6	0.79075	0.79327	1	14918	1	0.55883	0.0054875	0.023586	0.695078	686	5	0.55883
PLAC1	6	0.36252	0.50661	1	7962	2	0.61678	0.0054909	0.023598	0.695078	687	3	0.61678
hsa-mir-377	4	0.66384	0.66452	1	12395	1	0.32585	0.0054971	0.019129	0.663327	688	2	0.32585	Active
FNDC4	6	0.78891	0.79171	1	14880	1	0.97968	0.00551	0.023665	0.695953	689	5	0.97968
GABRA3	6	0.9639	0.9639	1	20214	0	1.0125	0.0055234	0.023713	0.695953	690	4	1.0125
OR7E24	6	0.99107	0.99109	1	21235	0	0.82327	0.0055267	0.023724	0.695953	691	5	0.82327
C10orf68	6	0.98182	0.98198	1	20858	0	0.99953	0.0055444	0.023792	0.696532	692	4	0.99953
SMIM20	6	0.97881	0.97895	1	20747	0	0.94557	0.0055571	0.023844	0.696634	693	5	0.94557
ARMC4	6	0.98656	0.98661	1	21056	0	0.7941	0.0055786	0.023921	0.697023	694	5	0.7941
NFE2L2	6	0.88395	0.88401	1	17596	0	0.66015	0.0055875	0.023955	0.697084	695	5	0.66015
ATP11A	6	0.20176	0.35614	1	5709	2	0.62759	0.0056015	0.024005	0.69728	696	4	0.62759
ZYG11A	6	0.6315	0.68609	1	11865	1	0.98834	0.0056138	0.024048	0.69728	697	4	0.98834
RPL22L1	6	0.99162	0.99163	1	21265	0	0.84091	0.0056166	0.024059	0.69728	698	5	0.84091
SYT6	6	0.91172	0.91189	1	18456	0	0.4015	0.0056246	0.024092	0.697327	699	3	0.4015
OR51B4	6	0.67768	0.71239	1	12621	1	0.84063	0.0056482	0.024174	0.698151	700	5	0.84063
THRB	6	0.95235	0.95246	1	19819	0	0.91811	0.005653	0.024191	0.698151	701	5	0.91811
hsa-mir-6855	4	0.252	0.37296	1	6314	2	-0.14821	0.0056639	0.019649	0.669178	702	1	-0.14821	Active
hsa-mir-3182	4	0.99306	0.99307	1	21319	0	1.1537	0.0056683	0.019667	0.669178	703	4	1.1537	Active
ZNF772	6	0.79096	0.79344	1	14924	1	0.68948	0.0056875	0.024327	0.699803	704	4	0.68948
TXNDC8	6	0.90695	0.90709	1	18297	0	0.65425	0.0056903	0.024339	0.699803	705	5	0.65425
LRRTM1	6	0.48311	0.61704	1	10165	1	0.75039	0.0057024	0.02438	0.700056	706	5	0.75039
TMEM150C	6	0.87796	0.87799	1	17403	0	0.64803	0.0057217	0.024444	0.700456	707	4	0.64803
RAD50	6	0.74888	0.75983	1	13967	1	1.1064	0.0057264	0.024459	0.700456	708	5	1.1064
hsa-mir-2053	4	0.71896	0.7189	1	13341	0	-0.24077	0.0057305	0.019866	0.669862	709	1	-0.24077	Active
hsa-mir-495	4	0.99427	0.99429	1	21372	0	1.0351	0.0057325	0.019872	0.669862	710	4	1.0351	Active
ZNF747	6	0.83257	0.8324	1	16042	0	1.136	0.0057362	0.024495	0.70059	711	5	1.136
MTRNR2L5	4	0.46231	0.50557	1	9882	1	0.016821	0.0058306	0.020193	0.673627	712	1	0.016821
ZDHHC6	6	0.94782	0.94797	1	19645	0	0.35358	0.0058375	0.024866	0.709326	713	2	0.35358
TBC1D13	6	0.62402	0.68216	1	11762	1	0.66359	0.0058559	0.024937	0.710422	714	5	0.66359
ZNF652	6	0.41261	0.55487	1	8901	2	0.52928	0.0058807	0.025036	0.711195	715	3	0.52928
OR4D11	6	0.82844	0.82835	1	15923	0	0.5808	0.0058854	0.025053	0.711195	716	4	0.5808
RBMXL1	6	0.92484	0.92508	1	18894	0	0.43318	0.0058875	0.025063	0.711195	717	3	0.43318
LPPR1	6	0.97909	0.97923	1	20760	0	0.98888	0.0059222	0.025181	0.711414	718	5	0.98888
CFHR5	6	0.12529	0.25505	1	4439	1	0.97752	0.0059241	0.025188	0.711414	719	4	0.97752
ABHD12B	6	0.894	0.89416	1	17889	0	0.84792	0.0059258	0.025193	0.711414	720	5	0.84792
hsa-mir-4669	4	0.82713	0.827	1	15884	0	1.1275	0.0059364	0.020545	0.673627	721	2	1.1275	Active
AMPD1	6	0.58437	0.66207	1	11226	1	0.092303	0.0059374	0.025233	0.711414	722	1	0.092303
MSI2	6	0.95176	0.95189	1	19800	0	1.1304	0.005945	0.025259	0.711414	723	5	1.1304
SLC36A1	6	0.63602	0.68853	1	11939	1	1.1636	0.0059475	0.025267	0.711414	724	4	1.1636
OR52E2	6	0.73021	0.74634	1	13573	1	0.3682	0.0059705	0.025355	0.711438	725	3	0.3682
hsa-mir-5708	3	0.2468	0.30967	1	6240	1	0.59924	0.0059779	0.016356	0.64352	726	2	0.59924	Active
MARVELD3	6	0.15951	0.30923	1	5077	3	-0.10791	0.0059874	0.025419	0.711438	727	2	-0.10791
CST2	6	0.78864	0.79151	1	14874	1	0.95716	0.0059883	0.025421	0.711438	728	5	0.95716
BTG2	6	0.26688	0.4164	1	6521	1	0.74508	0.005999	0.025455	0.711438	729	5	0.74508
ANKRD22	6	0.87513	0.87519	1	17315	0	0.9449	0.006002	0.025465	0.711438	730	4	0.9449
hsa-mir-6864	4	0.94072	0.94058	1	19416	0	1.0016	0.0060166	0.020825	0.673627	731	3	1.0016	Active
UTRN	6	0.72345	0.74174	1	13429	1	0.52445	0.0060374	0.025601	0.712903	732	4	0.52445
ZNF157	6	0.9321	0.93233	1	19135	0	1.0781	0.0060427	0.025616	0.712903	733	4	1.0781
TFCP2L1	6	0.98485	0.98497	1	20984	0	1.0567	0.006068	0.025696	0.713743	734	5	1.0567
ARL14EPL	6	0.50276	0.62515	1	10322	1	0.56529	0.0060792	0.025736	0.713743	735	3	0.56529
ZNF33A	6	0.84459	0.84447	1	16391	0	0.046861	0.0060874	0.025771	0.713743	736	1	0.046861
UGP2	6	0.022147	0.067775	0.615844	2351	3	-0.20837	0.0061087	0.025854	0.713743	737	3	-0.20837
MYOZ3	6	0.92895	0.92919	1	19034	0	0.18695	0.0061373	0.025965	0.713743	738	2	0.18695
LRRTM2	6	0.96104	0.96103	1	20098	0	0.86571	0.0061394	0.025973	0.713743	739	5	0.86571
FANK1	6	0.89746	0.89758	1	17990	0	0.76074	0.0061464	0.025993	0.713743	740	3	0.76074
SLC22A1	6	0.93925	0.93948	1	19369	0	0.71972	0.0061522	0.026017	0.713743	741	5	0.71972
ZNF624	6	0.79051	0.79307	1	14911	1	0.72375	0.0061632	0.026068	0.713743	742	5	0.72375
EPB41L1	6	0.42288	0.56489	1	9086	1	0.58108	0.0061873	0.026144	0.713743	743	4	0.58108
hsa-mir-8053	4	0.49671	0.52897	1	10266	1	-0.072746	0.0061972	0.021441	0.676156	744	1	-0.072746	Active
TNKS1BP1	6	0.78902	0.79181	1	14885	1	0.89125	0.0062046	0.0262	0.713743	745	5	0.89125
TBC1D16	6	0.38075	0.52409	1	8310	2	1.1719	0.0062107	0.026221	0.713743	746	4	1.1719
hsa-mir-3164	4	0.99377	0.99379	1	21348	0	1.0354	0.006233	0.021554	0.676156	747	4	1.0354	Active
NDRG2	6	0.34982	0.49455	1	7750	1	0.91453	0.0062373	0.02633	0.713743	748	4	0.91453
VAMP1	6	0.98131	0.98146	1	20837	0	0.54964	0.0062921	0.026515	0.713743	749	5	0.54964
MPZL3	6	0.78642	0.78959	1	14816	1	0.6568	0.0062981	0.026538	0.713743	750	5	0.6568
PPIP5K1	6	0.84835	0.84825	1	16489	0	0.99358	0.0062989	0.02654	0.713743	751	4	0.99358
OCRL	6	0.97655	0.97667	1	20652	0	0.97987	0.0063053	0.026567	0.713743	752	5	0.97987
CAMK1	6	0.88503	0.88506	1	17629	0	0.98875	0.0063131	0.026594	0.713743	753	5	0.98875
LMNA	6	0.82784	0.82773	1	15900	0	0.72076	0.0063177	0.02661	0.713743	754	5	0.72076
MMP11	6	0.44757	0.58911	1	9562	2	0.64362	0.0063372	0.026681	0.713743	755	3	0.64362
DHRS4L1	6	0.97157	0.97161	1	20480	0	0.82046	0.0063589	0.026759	0.713743	756	5	0.82046
RAB3IL1	6	0.64255	0.6921	1	12044	1	0.85747	0.0063613	0.026767	0.713743	757	4	0.85747
PPM1N	6	0.44513	0.58676	1	9511	1	0.66649	0.0063872	0.026868	0.713743	758	4	0.66649
MYBPC1	6	0.8864	0.88645	1	17670	0	0.68312	0.00639	0.026879	0.713743	759	5	0.68312
OSER1	4	0.99361	0.99364	1	21343	0	0.70994	0.0063904	0.022065	0.684884	760	4	0.70994
CSTA	6	0.84033	0.84023	1	16259	0	0.78536	0.0064013	0.026917	0.713743	761	5	0.78536
DPF3	6	0.57301	0.65653	1	11074	1	0.93241	0.006414	0.026969	0.713743	762	4	0.93241
ZBTB26	6	0.99633	0.99637	1	21460	0	0.89248	0.0064211	0.026996	0.713743	763	5	0.89248
UBTD1	6	0.61513	0.67748	1	11641	1	1.0402	0.0064239	0.027002	0.713743	764	5	1.0402
KCNK1	6	0.90139	0.90147	1	18109	0	0.77166	0.0064284	0.027015	0.713743	765	4	0.77166
LARP1	6	0.1876	0.34314	1	5530	1	0.86557	0.0064297	0.027019	0.713743	766	4	0.86557
CCL20	6	0.9962	0.99625	1	21453	0	0.72428	0.0064325	0.027033	0.713743	767	5	0.72428
ASB5	6	0.83573	0.83563	1	16122	0	0.44898	0.0064371	0.027051	0.713743	768	4	0.44898
KLF11	6	0.96927	0.96927	1	20406	0	0.80481	0.0064372	0.027052	0.713743	769	5	0.80481
CRLF1	6	0.72913	0.74557	1	13554	1	0.1479	0.0064386	0.02706	0.713743	770	2	0.1479
hsa-mir-9-3	4	0.59867	0.60677	1	11423	1	1.0241	0.0064649	0.022296	0.686841	771	3	1.0241	Active
HNRNPLL	6	0.99714	0.99718	1	21499	0	0.81654	0.0064819	0.027216	0.716305	772	5	0.81654
PPAP2A	6	0.79824	0.79969	1	15092	1	0.45224	0.0064871	0.027233	0.716305	773	3	0.45224
ODF2	6	0.9579	0.9579	1	20000	0	0.68394	0.0064924	0.027256	0.716305	774	5	0.68394
TNFRSF18	6	0.84726	0.84714	1	16464	0	0.79198	0.0065107	0.02732	0.717115	775	3	0.79198
KRTAP4-4	6	0.099324	0.21325	1	3937	3	-0.29815	0.0065371	0.027425	0.718216	776	1	-0.29815
SLC22A10	6	0.83219	0.83202	1	16030	0	0.59004	0.0065553	0.027486	0.718877	777	3	0.59004
AKR1C3	6	0.98823	0.9883	1	21124	0	0.74744	0.0065766	0.027568	0.719024	778	4	0.74744
hsa-mir-5697	4	0.99342	0.99345	1	21337	0	0.78287	0.0065802	0.022667	0.688347	779	4	0.78287	Active
GOLGA3	6	0.3893	0.5324	1	8453	2	-0.33131	0.006587	0.027604	0.719024	780	2	-0.33131
TNFSF13B	6	0.84836	0.84826	1	16490	0	0.83473	0.0065932	0.027632	0.719024	781	5	0.83473
VGLL4	6	0.99331	0.99334	1	21330	0	0.75786	0.0066096	0.02769	0.719024	782	5	0.75786
LRFN4	6	0.66872	0.70712	1	12480	1	0.92499	0.0066541	0.027846	0.721337	783	4	0.92499
SLC36A3	6	0.57135	0.65573	1	11055	1	1.0191	0.0066795	0.027934	0.721402	784	4	1.0191
TBC1D24	6	0.95554	0.95556	1	19918	0	0.73406	0.0066869	0.027962	0.721402	785	5	0.73406
MON1A	6	0.74455	0.75665	1	13872	1	0.92385	0.0066881	0.027966	0.721402	786	4	0.92385
DNAJC7	6	0.98432	0.98444	1	20957	0	0.79937	0.0066922	0.027981	0.721402	787	5	0.79937
KHK	6	0.95511	0.95517	1	19903	0	1.0106	0.0067108	0.028041	0.722073	788	5	1.0106
ZDHHC12	6	0.90954	0.90967	1	18386	0	0.91641	0.0067235	0.028087	0.722414	789	5	0.91641
BBC3	6	0.99268	0.9927	1	21299	0	0.79414	0.0067566	0.028208	0.724665	790	5	0.79414
CCL16	6	0.99278	0.99279	1	21305	0	0.90102	0.0067868	0.028322	0.725885	791	5	0.90102
KPNA5	6	0.84319	0.84309	1	16354	0	0.89787	0.0068049	0.028383	0.725885	792	4	0.89787
DHX40	6	0.61706	0.67851	1	11666	1	0.79294	0.0068117	0.028409	0.725885	793	4	0.79294
NRIP1	6	0.80151	0.80254	1	15183	1	0.49282	0.006817	0.028432	0.725885	794	3	0.49282
FGF11	6	0.85646	0.85639	1	16739	0	0.72353	0.006826	0.028456	0.725885	795	5	0.72353
MARK2	6	0.38861	0.5317	1	8441	1	0.43964	0.0068368	0.028493	0.725962	796	3	0.43964
GOLIM4	4	0.99315	0.99317	1	21323	0	0.92529	0.0068472	0.02356	0.695078	797	4	0.92529
LOC100129924	6	0.95488	0.95493	1	19894	0	0.27433	0.0068867	0.02867	0.72883	798	3	0.27433
TMPRSS11F	6	0.99503	0.99506	1	21402	0	0.62473	0.0069057	0.028741	0.729715	799	5	0.62473
CSN1S1	6	0.85692	0.85687	1	16749	0	0.87673	0.0069366	0.028855	0.731235	800	4	0.87673
LRRTM3	6	0.30489	0.45192	1	7038	1	0.79693	0.006941	0.028868	0.731235	801	3	0.79693
CYTH3	6	0.57533	0.65765	1	11104	1	1.0514	0.0069631	0.02894	0.732047	802	5	1.0514
ARHGEF5	6	0.31923	0.46549	1	7264	2	-0.059204	0.0069866	0.02902	0.732047	803	2	-0.059204
GMNC	6	0.29583	0.4434	1	6911	2	0.33342	0.0069896	0.029026	0.732047	804	3	0.33342
OR51B6	6	0.99202	0.99204	1	21272	0	0.9337	0.006994	0.029035	0.732047	805	5	0.9337
KDM4B	6	0.82522	0.82511	1	15834	0	0.90215	0.0070038	0.029076	0.732231	806	5	0.90215
CDCA8	6	0.0047967	0.019403	0.256362	1622	4	-1.347	0.0070365	0.029188	0.732931	807	1	-1.347
PTER	6	0.84906	0.84896	1	16506	0	0.57879	0.0070696	0.02931	0.733213	808	3	0.57879
C12orf61	6	0.42185	0.56386	1	9071	2	-0.023141	0.0070864	0.029371	0.733213	809	2	-0.023141
ITGA9	6	0.5243	0.63438	1	10541	1	0.84679	0.0070886	0.029379	0.733213	810	5	0.84679
PFN3	6	0.99666	0.9967	1	21476	0	0.96652	0.0070915	0.02939	0.733213	811	5	0.96652
MXRA5	6	0.84603	0.8459	1	16429	0	0.76793	0.0070978	0.029419	0.733213	812	5	0.76793
RAD54L2	6	0.96266	0.96265	1	20161	0	0.44614	0.0071435	0.029571	0.734169	813	4	0.44614
ISM2	6	0.93789	0.93814	1	19326	0	0.89768	0.0071538	0.0296	0.734169	814	5	0.89768
ARHGEF39	6	0.92205	0.92224	1	18784	0	0.74124	0.007159	0.029618	0.734169	815	3	0.74124
hsa-mir-193b	4	0.99088	0.99091	1	21228	0	1.2111	0.00716	0.024564	0.701635	816	4	1.2111	Active
KDR	6	0.8754	0.87546	1	17320	0	1.0686	0.0071602	0.02962	0.734169	817	4	1.0686
ZYG11B	6	0.062143	0.15122	0.97903	3298	1	0.97755	0.0071729	0.02966	0.734169	818	4	0.97755
CHRNE	6	0.417	0.55909	1	8984	2	0.70805	0.0071863	0.029707	0.734494	819	4	0.70805
VPS13B	6	0.33979	0.48492	1	7579	1	0.61059	0.0072055	0.029773	0.73497	820	4	0.61059
ADAM18	6	0.95562	0.95565	1	19922	0	0.84063	0.007213	0.029799	0.73497	821	5	0.84063
FUT11	6	0.94089	0.94111	1	19424	0	0.51993	0.0072362	0.02989	0.73497	822	3	0.51993
FAM194B	6	0.99321	0.99325	1	21327	0	0.74401	0.0072368	0.029892	0.73497	823	5	0.74401
NARR	5	0.98457	0.98463	1	20971	0	0.48575	0.0072413	0.029398	0.733213	824	4	0.48575
ETFB	6	0.87929	0.87934	1	17448	0	1.0457	0.0072621	0.029975	0.73497	825	4	1.0457
HIST3H2A	6	0.13285	0.26713	1	4584	1	0.80567	0.0072631	0.029981	0.73497	826	3	0.80567
GSS	6	0.088354	0.19518	1	3767	2	0.50294	0.0072676	0.029997	0.73497	827	3	0.50294
C1orf151-NBL1	6	0.83309	0.83295	1	16057	0	0.60776	0.0073097	0.030156	0.73626	828	5	0.60776
MAGEA10-MAGEA5	6	0.83107	0.83092	1	15995	0	0.84283	0.0073205	0.030196	0.73626	829	5	0.84283
SLC46A2	6	0.89077	0.89086	1	17800	0	0.42409	0.0073361	0.030249	0.73626	830	4	0.42409
P2RX7	6	0.94576	0.9459	1	19583	0	0.91987	0.0073473	0.03028	0.73626	831	4	0.91987
CD40	6	0.94799	0.94813	1	19653	0	1.0311	0.0073496	0.030287	0.73626	832	4	1.0311
LAMTOR1	6	0.024797	0.074844	0.655575	2432	4	-0.65296	0.007386	0.03042	0.73833	833	1	-0.65296
HDGF	6	0.57896	0.65939	1	11148	1	0.68922	0.0073954	0.030452	0.73833	834	3	0.68922
RBM5	6	0.79767	0.7992	1	15079	1	0.87279	0.0074092	0.0305	0.73833	835	5	0.87279
CNNM2	6	0.70993	0.73269	1	13193	1	0.54668	0.0074115	0.030509	0.73833	836	3	0.54668
hsa-mir-3186	4	0.99258	0.99261	1	21296	0	0.84892	0.0074157	0.025356	0.711438	837	4	0.84892	Active
ADCY2	6	0.62948	0.68502	1	11840	1	0.42393	0.0074359	0.030589	0.73946	838	3	0.42393
GPBP1	6	0.95502	0.95508	1	19899	0	0.91672	0.0074558	0.030655	0.739575	839	4	0.91672
hsa-mir-4321	4	0.94316	0.94303	1	19499	0	0.22729	0.0074632	0.025513	0.71186	840	1	0.22729	Active
ACRC	5	0.97443	0.9745	1	20574	0	1.0745	0.0074646	0.030257	0.73626	841	4	1.0745
STC2	6	0.98403	0.98414	1	20944	0	1.0058	0.0074775	0.030728	0.739575	842	5	1.0058
PTGER3	6	0.34199	0.48701	1	7620	1	0.51453	0.0074858	0.030752	0.739575	843	3	0.51453
ZFPM2	6	0.96753	0.96752	1	20340	0	0.72647	0.0074891	0.030765	0.739575	844	5	0.72647
STK16	6	0.89123	0.89133	1	17812	0	0.6267	0.0075008	0.030812	0.739626	845	5	0.6267
SLC4A9	6	0.17583	0.33237	1	5401	1	0.7432	0.0075061	0.030835	0.739626	846	5	0.7432
CGGBP1	6	0.83123	0.83108	1	15999	0	1.0215	0.0075362	0.030943	0.740593	847	4	1.0215
hsa-mir-1825	4	0.45881	0.50325	1	9794	1	0.63711	0.0075631	0.025827	0.713743	848	3	0.63711	Active
STAM2	6	0.17831	0.33463	1	5428	2	0.1075	0.0075857	0.031118	0.742909	850	2	0.1075
hsa-mir-6512	4	0.40104	0.4665	1	8670	1	0.97107	0.0075979	0.025937	0.713743	851	2	0.97107	Active
CELA3A	6	0.94892	0.94903	1	19698	0	0.73099	0.007599	0.031162	0.742909	852	3	0.73099
PTPN21	6	0.93779	0.93802	1	19321	0	0.90269	0.0076148	0.031212	0.742909	853	4	0.90269
ZDHHC15	6	0.95593	0.95594	1	19933	0	0.90915	0.007627	0.031252	0.742909	854	4	0.90915
ARNT2	6	0.96977	0.96977	1	20428	0	0.94975	0.0076545	0.031341	0.742909	855	4	0.94975
CFC1	5	0.81197	0.81218	1	15462	0	0.65024	0.0076573	0.030882	0.739935	856	4	0.65024
CNIH4	6	0.74357	0.75592	1	13852	1	0.89555	0.0076622	0.031377	0.742909	857	4	0.89555
CEP41	6	0.97733	0.97745	1	20684	0	0.85678	0.0076723	0.031412	0.742909	858	5	0.85678
PPP1R16B	6	0.77285	0.77837	1	14482	1	0.41692	0.0076855	0.031463	0.742909	859	3	0.41692
hsa-mir-548a-2	4	0.50757	0.53665	1	10361	1	0.79597	0.0076963	0.026228	0.713743	860	2	0.79597	Active
hsa-mir-302f	3	0.99229	0.99238	1	21285	0	0.80648	0.0077084	0.020875	0.673627	861	3	0.80648	Active
TNKS	6	0.98943	0.98949	1	21173	0	0.88255	0.007712	0.031554	0.742909	862	5	0.88255
SLC26A1	6	0.55457	0.64789	1	10838	1	0.94766	0.007728	0.031612	0.742909	863	5	0.94766
KRTAP17-1	6	0.92161	0.92183	1	18771	0	0.29774	0.0077354	0.03164	0.742909	864	2	0.29774
TTC36	6	0.83122	0.83106	1	15998	0	0.86183	0.0077371	0.031645	0.742909	865	5	0.86183
RFX4	6	0.66469	0.70468	1	12412	1	0.72006	0.0077422	0.031664	0.742909	866	3	0.72006
BTBD9	6	0.97963	0.97978	1	20781	0	0.8468	0.0077481	0.031688	0.742909	867	5	0.8468
RBM20	6	0.95728	0.95726	1	19982	0	0.9321	0.0077557	0.031712	0.742909	868	5	0.9321
CCDC122	6	0.94315	0.94332	1	19497	0	0.75016	0.0077682	0.031758	0.742909	869	3	0.75016
LOC100129361	6	0.95235	0.95247	1	19821	0	0.48851	0.0078017	0.03189	0.742909	870	3	0.48851
IQCF3	6	0.92006	0.92027	1	18721	0	1.019	0.0078108	0.031918	0.742909	871	5	1.019
TET1	6	0.43582	0.5775	1	9321	2	0.97328	0.0078322	0.031987	0.742909	872	4	0.97328
hsa-mir-5088	4	0.99217	0.99217	1	21278	0	0.68783	0.0078347	0.026667	0.713743	873	4	0.68783	Active
ASGR1	6	0.12427	0.2534	1	4420	3	-0.33178	0.0078352	0.032001	0.742909	874	2	-0.33178
HIST1H1C	6	0.91804	0.91825	1	18646	0	0.92571	0.0078375	0.032008	0.742909	875	5	0.92571
WT1	6	0.98432	0.98444	1	20958	0	0.78044	0.0078447	0.032036	0.742909	876	4	0.78044
hsa-mir-4678	4	0.30308	0.40955	1	7013	1	1.0437	0.0078601	0.026745	0.713743	877	3	1.0437	Active
RSRC1	6	0.96751	0.9675	1	20339	0	0.90153	0.0078609	0.03209	0.742909	878	5	0.90153
TSPAN32	6	0.95324	0.95335	1	19848	0	0.69061	0.0078812	0.032151	0.742909	879	5	0.69061
KBTBD13	6	0.20007	0.35455	1	5688	2	0.49212	0.0078851	0.032162	0.742909	880	3	0.49212
PUM1	6	0.80538	0.80606	1	15284	1	0.78317	0.0078918	0.032186	0.742909	881	4	0.78317
TNFRSF17	6	0.99439	0.99442	1	21376	0	0.51102	0.0079149	0.032266	0.742909	882	5	0.51102
PARL	6	0.38133	0.52465	1	8325	2	0.47515	0.0079258	0.032307	0.742909	883	3	0.47515
hsa-mir-7106	4	0.99207	0.99208	1	21273	0	0.68869	0.0079277	0.026968	0.713743	884	4	0.68869	Active
HSD17B8	6	0.77982	0.78404	1	14650	1	0.95344	0.0079279	0.032314	0.742909	885	4	0.95344
TGFA	6	0.5877	0.66371	1	11274	1	0.90295	0.00793	0.032318	0.742909	886	4	0.90295
POLH	6	0.4676	0.60889	1	9995	2	-0.099416	0.007935	0.032332	0.742909	887	1	-0.099416
GK2	6	0.89284	0.89299	1	17860	0	0.82563	0.0079396	0.032355	0.742909	888	4	0.82563
LILRB4	6	0.78571	0.789	1	14799	1	0.13388	0.0079691	0.032451	0.742909	889	3	0.13388
N4BP2L1	6	0.88436	0.8844	1	17605	0	0.91905	0.0079756	0.032475	0.742909	890	4	0.91905
FCRLA	6	0.93728	0.93751	1	19305	0	0.85326	0.0080071	0.032581	0.742909	891	5	0.85326
IFI44	6	0.36439	0.50838	1	8000	2	0.83692	0.0080072	0.032581	0.742909	892	4	0.83692
FXYD4	6	0.75621	0.76524	1	14123	1	0.71429	0.0080286	0.032656	0.742909	893	3	0.71429
LGR6	6	0.88385	0.88392	1	17592	0	0.33751	0.0080348	0.032677	0.742909	894	3	0.33751
LAMP2	6	0.78047	0.78459	1	14668	1	0.98089	0.0080358	0.03268	0.742909	895	4	0.98089
MOB3C	6	0.96366	0.96367	1	20207	0	0.97301	0.008045	0.032715	0.742909	896	4	0.97301
OR8A1	6	0.98206	0.98222	1	20868	0	0.91517	0.0080673	0.032794	0.742909	897	4	0.91517
OPRD1	6	0.18081	0.33696	1	5454	2	0.55195	0.008077	0.032824	0.742909	898	3	0.55195
THAP2	6	0.93806	0.93831	1	19329	0	0.91214	0.0080817	0.032842	0.742909	899	4	0.91214
CCDC67	6	0.75505	0.76435	1	14095	1	0.94674	0.0080867	0.032854	0.742909	900	4	0.94674
hsa-mir-3190	4	0.97236	0.97236	1	20513	0	1.0444	0.0081333	0.027631	0.719024	901	3	1.0444	Active
CHRM3	6	0.41212	0.55439	1	8893	2	-0.14899	0.0081346	0.03303	0.745304	902	1	-0.14899
hsa-mir-1302-8	4	0.85535	0.85508	1	16710	0	1.0932	0.0081513	0.027689	0.719024	903	3	1.0932	Active
CUEDC2	6	0.96989	0.96988	1	20431	0	0.95119	0.0081555	0.033104	0.745455	904	5	0.95119
AACS	6	0.83629	0.83618	1	16143	0	0.4824	0.0081845	0.033193	0.745921	905	4	0.4824
PEX16	6	0.57377	0.6569	1	11085	1	0.9398	0.0082158	0.033305	0.74599	906	4	0.9398
BGLAP	6	0.33269	0.47822	1	7467	1	0.78434	0.0082316	0.033364	0.74599	907	4	0.78434
MAML2	6	0.79923	0.80053	1	15113	1	0.64836	0.0082407	0.033401	0.74599	908	5	0.64836
MMP10	6	0.20746	0.36138	1	5769	1	0.88284	0.0082422	0.033406	0.74599	909	4	0.88284
CD5	6	0.81964	0.81959	1	15679	1	0.73866	0.0082625	0.03348	0.74599	910	5	0.73866
ELTD1	6	0.98625	0.98633	1	21044	0	0.65285	0.0082648	0.033487	0.74599	911	5	0.65285
USP19	6	0.76651	0.77322	1	14339	1	0.86217	0.0082751	0.033524	0.74599	912	5	0.86217
C11orf80	6	0.8713	0.87131	1	17210	0	0.19662	0.0082842	0.033558	0.74599	913	2	0.19662
TMEM59L	6	0.41325	0.55548	1	8911	1	0.30019	0.0082868	0.033565	0.74599	914	3	0.30019
APCS	6	0.73703	0.7512	1	13705	1	0.71934	0.0083224	0.033688	0.74599	915	5	0.71934
FAM47E	6	0.8738	0.87387	1	17283	0	0.056973	0.0083341	0.033717	0.74599	916	1	0.056973
TRAK2	6	0.92096	0.92118	1	18754	0	0.72188	0.0083559	0.033793	0.74599	917	5	0.72188
PRR23B	6	0.20883	0.36262	1	5783	1	0.78134	0.0083663	0.033826	0.74599	918	5	0.78134
GALM	6	0.81917	0.81915	1	15666	1	0.85362	0.0084128	0.033984	0.74599	919	5	0.85362
ZCCHC11	6	0.97891	0.97905	1	20750	0	0.87311	0.0084339	0.034051	0.74599	921	4	0.87311
USMG5	6	0.96632	0.96632	1	20300	0	1.0763	0.0084481	0.034106	0.74599	922	5	1.0763
OTOA	6	0.86091	0.86082	1	16886	0	0.89917	0.0084492	0.03411	0.74599	923	4	0.89917
hsa-mir-4486	4	0.98333	0.98333	1	20917	0	1.1255	0.0084618	0.028672	0.72883	924	4	1.1255	Active
RNF115	6	0.99453	0.99456	1	21382	0	0.91984	0.0084666	0.034172	0.74599	925	5	0.91984
CAMKK1	6	0.98237	0.98253	1	20880	0	0.73759	0.0084689	0.034181	0.74599	926	5	0.73759
DNMBP	6	0.72096	0.74004	1	13377	1	1.0324	0.0085055	0.034297	0.74599	927	4	1.0324
PDGFRL	6	0.6957	0.72344	1	12918	1	0.10405	0.0085373	0.034398	0.74599	928	2	0.10405
GPR32	6	0.72563	0.74318	1	13485	1	0.77137	0.0085381	0.034401	0.74599	929	5	0.77137
VPS33B	6	0.66324	0.70384	1	12383	1	0.84783	0.008562	0.034489	0.74599	930	5	0.84783
CYP8B1	6	0.9627	0.96268	1	20164	0	0.63292	0.0085653	0.034501	0.74599	931	5	0.63292
TBC1D22A	6	0.92075	0.92099	1	18747	0	0.85164	0.0085684	0.034511	0.74599	932	4	0.85164
FNDC3A	6	0.46461	0.60597	1	9927	1	0.71632	0.0085757	0.034538	0.74599	933	3	0.71632
TMEM209	6	0.31437	0.4609	1	7184	1	1.0122	0.0085984	0.034617	0.74599	934	5	1.0122
hsa-mir-363	4	0.74961	0.74955	1	13982	0	1.282	0.0086025	0.029115	0.732369	935	3	1.282	Active
CXorf58	6	0.96068	0.96066	1	20082	0	0.78993	0.0086043	0.034639	0.74599	936	5	0.78993
KMT2C	6	0.78507	0.78847	1	14777	1	0.89618	0.008611	0.034665	0.74599	937	5	0.89618
FAM151B	6	0.41204	0.55432	1	8890	2	0.77453	0.0086135	0.034676	0.74599	938	4	0.77453
NCDN	6	0.40474	0.54728	1	8744	1	0.96113	0.0086185	0.034691	0.74599	939	5	0.96113
SENP2	6	0.93516	0.93536	1	19233	0	0.50477	0.0086215	0.0347	0.74599	940	4	0.50477
MARK3	6	0.95185	0.95197	1	19804	0	0.73781	0.0086221	0.034701	0.74599	941	5	0.73781
RCC2	6	0.90457	0.90467	1	18211	0	1.0399	0.0086261	0.034721	0.74599	942	4	1.0399
SH2D1A	6	0.88243	0.88248	1	17547	0	0.78198	0.0086261	0.034721	0.74599	943	3	0.78198
hsa-mir-4307	4	0.17484	0.277	1	5392	2	0.10352	0.0086281	0.029205	0.732931	944	2	0.10352	Active
TRMT44	6	0.74276	0.75533	1	13839	1	0.27907	0.0086333	0.034744	0.74599	945	3	0.27907
POPDC2	6	0.63355	0.6872	1	11897	1	0.92427	0.0086373	0.034754	0.74599	946	4	0.92427
ARGFX	6	0.81404	0.81415	1	15521	1	0.80848	0.0086459	0.034784	0.74599	947	5	0.80848
TNFSF14	6	0.96354	0.96353	1	20203	0	0.97263	0.0086716	0.034876	0.74599	948	4	0.97263
TMEM218	6	0.43563	0.57731	1	9317	1	0.88538	0.0086741	0.034885	0.74599	949	4	0.88538
PNMT	6	0.97683	0.97697	1	20667	0	0.76877	0.0086828	0.03491	0.74599	950	5	0.76877
NOSIP	6	0.98469	0.98481	1	20976	0	1.0866	0.008684	0.034915	0.74599	951	4	1.0866
GABRD	6	0.35404	0.4985	1	7813	2	0.17916	0.0087571	0.035178	0.74941	952	3	0.17916
CYHR1	6	0.46473	0.60609	1	9930	1	0.8804	0.0087714	0.035226	0.749594	953	4	0.8804
FAM120C	6	0.87326	0.87332	1	17267	0	0.90822	0.0087909	0.035298	0.749594	954	4	0.90822
CHL1	6	0.77036	0.77638	1	14424	1	0.96299	0.0088245	0.035411	0.749594	955	5	0.96299
CAMKK2	6	0.73685	0.75105	1	13701	1	0.23928	0.0088328	0.035435	0.749594	956	1	0.23928
CTNND1	6	0.85924	0.85918	1	16822	0	0.80887	0.0088511	0.035483	0.749594	957	5	0.80887
hsa-mir-6502	3	0.99114	0.99121	1	21245	0	0.78268	0.00886	0.023808	0.696532	958	3	0.78268	Active
hsa-mir-6722	4	0.26218	0.38561	1	6457	1	0.32175	0.008861	0.029952	0.73497	959	2	0.32175	Active
C2orf68	6	0.63302	0.68692	1	11890	1	0.9581	0.0088708	0.035554	0.749594	960	4	0.9581
UTS2	6	0.76013	0.76825	1	14198	1	0.60928	0.0088731	0.035563	0.749594	961	3	0.60928
LPCAT1	6	0.087062	0.19299	1	3739	3	-0.50527	0.0088827	0.035595	0.749594	962	2	-0.50527
OAZ3	6	0.72781	0.74467	1	13533	1	0.39148	0.0089223	0.035743	0.749594	963	3	0.39148
PLCB1	6	0.60586	0.67278	1	11521	1	0.64931	0.008924	0.035748	0.749594	964	5	0.64931
ASF1A	6	0.99458	0.99461	1	21385	0	0.90018	0.0089249	0.035749	0.749594	965	5	0.90018
PTAR1	6	0.87223	0.87226	1	17240	0	0.056302	0.0089325	0.035774	0.749594	966	2	0.056302
DUPD1	6	0.47477	0.61368	1	10101	1	0.84955	0.0089513	0.035845	0.749696	967	4	0.84955
IFNA8	6	0.98606	0.98616	1	21034	0	0.85695	0.0089679	0.035918	0.749696	968	5	0.85695
GDPD2	6	0.59174	0.66573	1	11335	1	0.87686	0.0089814	0.03596	0.749696	969	4	0.87686
SORBS2	6	0.97712	0.97724	1	20679	0	0.81999	0.0089826	0.035964	0.749696	970	5	0.81999
SLIT3	6	0.99458	0.99461	1	21386	0	0.98615	0.0089887	0.035986	0.749696	971	5	0.98615
P4HTM	6	0.9277	0.92794	1	18990	0	0.79078	0.0090047	0.03604	0.750107	972	5	0.79078
MAU2	6	0.066996	0.15936	1	3391	3	-0.72711	0.0090322	0.036139	0.750947	973	2	-0.72711
MDGA1	6	0.62429	0.6823	1	11764	1	0.72109	0.0090391	0.036159	0.750947	974	5	0.72109
TRAPPC13	6	0.30382	0.4509	1	7027	2	0.87634	0.0090592	0.036224	0.751052	975	4	0.87634
RAB11FIP3	6	0.55901	0.64989	1	10894	1	0.97157	0.0090804	0.036312	0.752159	976	4	0.97157
hsa-mir-487b	4	0.72557	0.72557	1	13481	0	0.12497	0.0090938	0.030688	0.739575	977	1	0.12497	Active
CNGA4	6	0.75251	0.76252	1	14038	1	0.48027	0.0091319	0.036487	0.753668	978	4	0.48027
USP24	6	0.86512	0.86509	1	17020	0	0.99677	0.0091404	0.036515	0.753668	979	5	0.99677
EML6	6	0.9409	0.94112	1	19425	0	0.69911	0.0091409	0.036516	0.753668	980	4	0.69911
SNAP91	5	0.98046	0.98056	1	20812	0	0.96051	0.0091534	0.035178	0.74941	981	4	0.96051
NCCRP1	6	0.20703	0.36102	1	5763	2	0.16479	0.0091641	0.036595	0.753668	982	2	0.16479
PEX14	6	0.94277	0.94297	1	19487	0	0.70218	0.0091925	0.036694	0.753668	983	3	0.70218
CDH12	6	0.92684	0.9271	1	18961	0	0.36073	0.0091988	0.036718	0.753668	984	3	0.36073
FAM196A	6	0.98514	0.98526	1	20994	0	0.56437	0.0092039	0.036732	0.753668	985	5	0.56437
GUSB	6	0.73189	0.74754	1	13609	1	0.55187	0.0092316	0.036823	0.754304	986	3	0.55187
KLB	6	0.96207	0.96207	1	20138	0	0.92759	0.009282	0.037003	0.754304	987	4	0.92759
DOK4	6	0.93995	0.94019	1	19397	0	0.67469	0.0092899	0.03703	0.754304	988	3	0.67469
AP5M1	6	0.97282	0.97285	1	20530	0	0.67088	0.0092916	0.037035	0.754304	989	5	0.67088
PCDHGA10	2	0.81878	0.81854	1	15650	0	1.7209	0.0093292	0.017694	0.650279	990	1	1.7209
FGF10	6	0.57373	0.65688	1	11084	1	0.15096	0.0093313	0.037166	0.754304	991	2	0.15096
TCP10L	6	0.70262	0.72793	1	13043	1	0.48439	0.0093444	0.037217	0.754304	992	3	0.48439
PCYT1B	6	0.98282	0.98296	1	20899	0	0.8898	0.0093482	0.037228	0.754304	994	4	0.8898
GCC2	6	0.79036	0.79294	1	14909	1	0.99815	0.0093596	0.037269	0.754304	995	4	0.99815
CDH18	6	0.83992	0.83981	1	16249	0	0.85341	0.0093613	0.037273	0.754304	996	5	0.85341
GUCA1C	6	0.74164	0.75451	1	13812	1	0.4762	0.009362	0.037275	0.754304	997	4	0.4762
EID3	6	0.54271	0.64255	1	10723	1	0.35847	0.0093678	0.037299	0.754304	998	3	0.35847
hsa-mir-148b	4	0.99063	0.99065	1	21219	0	0.70328	0.009369	0.031583	0.742909	999	4	0.70328	Active
KCNJ6	6	0.30649	0.45343	1	7070	1	0.26381	0.0093811	0.037341	0.754304	1000	2	0.26381
GIF	6	0.87182	0.87184	1	17228	0	0.65581	0.0094293	0.03751	0.754304	1001	5	0.65581
BROX	6	0.96386	0.96385	1	20211	0	0.68526	0.009431	0.037513	0.754304	1002	4	0.68526
APOL6	6	0.91642	0.91665	1	18600	0	0.91832	0.0094413	0.037549	0.754304	1003	4	0.91832
PLSCR4	6	0.93097	0.9312	1	19102	0	0.87622	0.0094449	0.037561	0.754304	1004	4	0.87622
C20orf195	6	0.57641	0.65816	1	11118	1	0.7649	0.0094497	0.037575	0.754304	1005	5	0.7649
KCNG1	6	0.38029	0.52366	1	8297	1	0.82196	0.0094573	0.037608	0.754304	1006	4	0.82196
TCEAL8	6	0.78286	0.78658	1	14727	1	0.83747	0.009465	0.037637	0.754304	1007	5	0.83747
HDDC3	6	0.8776	0.8776	1	17389	0	0.94444	0.009474	0.037672	0.754304	1008	4	0.94444
IFNL3	6	0.047575	0.12605	0.880085	3051	3	-0.264	0.0094808	0.037689	0.754304	1009	2	-0.264
MATN4	6	0.97722	0.97733	1	20681	0	0.61826	0.0094879	0.037714	0.754304	1010	5	0.61826
RGL2	6	0.99237	0.99239	1	21288	0	0.65885	0.0094943	0.037744	0.754304	1011	5	0.65885
TRIO	6	0.98901	0.98908	1	21157	0	0.65595	0.0095289	0.037858	0.754304	1012	5	0.65595
RBM44	6	0.21093	0.36451	1	5813	1	0.63342	0.0095306	0.037865	0.754304	1013	3	0.63342
FAM43A	6	0.70326	0.72836	1	13057	1	0.99325	0.0095341	0.037876	0.754304	1014	4	0.99325
DISP1	6	0.98581	0.98592	1	21023	0	0.79676	0.0095417	0.037902	0.754304	1015	5	0.79676
hsa-mir-762	4	0.76778	0.76775	1	14364	0	1.0102	0.0095636	0.032203	0.742909	1016	3	1.0102	Active
KCTD16	6	0.93518	0.93537	1	19236	0	0.92198	0.0095726	0.038001	0.754397	1017	4	0.92198
ANXA11	6	0.48207	0.61662	1	10153	1	0.95455	0.0095738	0.038006	0.754397	1018	4	0.95455
RNF166	6	0.79218	0.79448	1	14950	1	0.26544	0.0095805	0.038031	0.754397	1019	2	0.26544
TENM3	6	0.97111	0.97115	1	20469	0	0.93937	0.0096135	0.038147	0.755519	1020	4	0.93937
MICALL2	6	0.69534	0.7232	1	12911	1	-0.083114	0.0096303	0.038207	0.755519	1021	2	-0.083114
CHD7	6	0.79217	0.79447	1	14949	1	0.69778	0.0096551	0.0383	0.755837	1022	5	0.69778
BLMH	6	0.88808	0.88812	1	17718	0	0.7327	0.0096732	0.038354	0.75584	1023	5	0.7327
H2AFB3	2	0.62442	0.62436	1	11767	0	1.5312	0.0096791	0.018351	0.654124	1024	1	1.5312
HDAC9	6	0.99518	0.99522	1	21412	0	0.75963	0.0096927	0.038413	0.75584	1025	5	0.75963
SLC39A14	6	0.087777	0.19419	1	3756	3	-0.62627	0.0097219	0.038521	0.75584	1027	2	-0.62627
LINS	6	0.99283	0.99285	1	21309	0	0.86309	0.0097231	0.038524	0.75584	1028	5	0.86309
SPERT	6	0.77714	0.78182	1	14589	1	0.74222	0.0097279	0.038541	0.75584	1029	4	0.74222
WDR17	6	0.93362	0.93384	1	19178	0	0.93571	0.0097283	0.038541	0.75584	1030	4	0.93571
CCDC71L	6	0.050802	0.13166	0.902771	3108	2	0.071085	0.0097299	0.038549	0.75584	1031	2	0.071085
hsa-mir-4800	4	0.99027	0.99029	1	21199	0	0.5193	0.0097311	0.032751	0.742909	1032	4	0.5193	Active
TEX264	6	0.9689	0.96888	1	20397	0	0.87169	0.0097371	0.038579	0.75584	1033	5	0.87169
H2AFJ	6	0.46228	0.60359	1	9880	1	-0.12019	0.0097798	0.038738	0.758265	1034	2	-0.12019
hsa-mir-761	3	0.13362	0.21701	1	4600	1	1.0339	0.0098002	0.026269	0.713743	1035	2	1.0339	Active
CCDC78	6	0.3021	0.44929	1	7000	2	0.1287	0.0098296	0.038914	0.759107	1036	3	0.1287
hsa-mir-3913-1	4	0.7581	0.75801	1	14161	0	0.91623	0.0098585	0.033153	0.745791	1037	3	0.91623	Active
MICALCL	6	0.92692	0.92717	1	18966	0	0.63922	0.0098705	0.039064	0.759715	1038	5	0.63922
TLR10	6	0.84117	0.84109	1	16289	0	0.91651	0.009877	0.039087	0.759715	1039	4	0.91651
ABCA13	6	0.94833	0.94847	1	19674	0	1.067	0.0098776	0.039088	0.759715	1040	4	1.067
PLA2G2A	6	0.82544	0.82534	1	15841	0	0.19489	0.0098794	0.039094	0.759715	1041	2	0.19489
SLC12A8	6	0.9947	0.99473	1	21391	0	0.62819	0.009889	0.039127	0.759715	1042	5	0.62819
ANKRD44	6	0.99429	0.99433	1	21373	0	0.6951	0.0099273	0.039247	0.759861	1043	5	0.6951
ARHGAP40	6	0.99328	0.99331	1	21329	0	0.83244	0.009965	0.039363	0.759861	1045	4	0.83244
PPIL3	6	0.98841	0.98847	1	21133	0	0.65227	0.0099829	0.039423	0.759861	1046	5	0.65227
WWTR1	6	0.96391	0.96391	1	20215	0	0.57813	0.010004	0.039504	0.759861	1047	3	0.57813
DZIP1L	6	0.97974	0.97989	1	20786	0	0.87824	0.010017	0.039554	0.759861	1048	5	0.87824
RNF128	6	0.88504	0.88507	1	17630	0	0.95179	0.01002	0.039561	0.759861	1049	5	0.95179
BPNT1	6	0.79907	0.80041	1	15108	1	0.59178	0.010028	0.039584	0.759861	1050	4	0.59178
AKR1C2	5	0.93267	0.93299	1	19154	0	0.72048	0.010042	0.037727	0.754304	1051	4	0.72048
MUC4	6	0.96053	0.96051	1	20080	0	0.89291	0.010061	0.039678	0.759861	1052	5	0.89291
NT5DC3	6	0.97123	0.97127	1	20473	0	0.56867	0.010071	0.03972	0.759861	1053	5	0.56867
DXO	4	0.66502	0.6657	1	12422	1	0.93453	0.01008	0.033872	0.74599	1054	3	0.93453
TRAF3IP1	6	0.90139	0.90147	1	18110	0	0.90998	0.010084	0.039767	0.759861	1055	5	0.90998
CHST12	6	0.98222	0.98237	1	20873	0	0.88828	0.01012	0.039894	0.759861	1056	5	0.88828
hsa-mir-3713	4	0.95117	0.95101	1	19780	0	0.65571	0.010124	0.034009	0.74599	1057	3	0.65571	Active
TMEM14C	6	0.92884	0.92908	1	19028	0	0.92346	0.01013	0.039931	0.759861	1058	4	0.92346
SIN3A	6	0.96121	0.9612	1	20109	0	0.92549	0.010145	0.03999	0.759861	1059	5	0.92549
TNRC18	6	0.97091	0.97094	1	20462	0	0.94392	0.010161	0.04004	0.759861	1060	4	0.94392
SECISBP2L	6	0.74823	0.75935	1	13942	1	0.67612	0.010173	0.040082	0.759861	1061	3	0.67612
SPANXN2	6	0.77688	0.78162	1	14583	1	0.38439	0.010178	0.040098	0.759861	1062	3	0.38439
C11orf24	6	0.96126	0.96127	1	20112	0	0.8442	0.010185	0.04012	0.759861	1063	5	0.8442
AIG1	6	0.61895	0.6795	1	11692	1	0.62534	0.010236	0.040292	0.759861	1064	5	0.62534
PRB2	3	0.64686	0.64677	1	12114	0	-0.12688	0.010249	0.027428	0.718216	1065	1	-0.12688
ZFYVE19	6	0.67497	0.71076	1	12577	1	0.19697	0.010264	0.040379	0.759861	1066	3	0.19697
HCAR1	6	0.8772	0.87724	1	17379	0	0.4237	0.010271	0.040394	0.759861	1067	3	0.4237
HCRT	6	0.047191	0.12541	0.878385	3040	3	-0.57358	0.010278	0.040418	0.759861	1068	1	-0.57358
IL11RA	6	0.99105	0.99106	1	21234	0	0.7351	0.010278	0.040419	0.759861	1069	5	0.7351
CACNA1H	6	0.66063	0.70232	1	12338	1	0.66356	0.010296	0.040485	0.759861	1070	5	0.66356
CCDC15	6	0.98878	0.98885	1	21146	0	0.75806	0.010297	0.04049	0.759861	1071	5	0.75806
SNTG1	6	0.85177	0.85165	1	16597	0	0.71029	0.010299	0.040497	0.759861	1072	3	0.71029
TNRC6B	6	0.96886	0.96884	1	20394	0	0.9033	0.010322	0.040572	0.759861	1073	5	0.9033
IL17D	6	0.12439	0.2536	1	4422	2	0.3744	0.010328	0.040598	0.759861	1074	3	0.3744
SH3GL1	6	0.47159	0.61239	1	10073	1	0.90723	0.01035	0.040685	0.759861	1075	5	0.90723
DOK1	6	0.018318	0.0574	0.551591	2231	2	0.96999	0.010353	0.040697	0.759861	1076	4	0.96999
GPR22	6	0.66218	0.70322	1	12367	1	0.89696	0.010359	0.040718	0.759861	1077	4	0.89696
RANBP9	6	0.99515	0.99519	1	21409	0	0.90466	0.01036	0.040724	0.759861	1078	5	0.90466
WBSCR22	6	0.069553	0.1637	1	3433	2	0.15592	0.010377	0.040787	0.759861	1080	3	0.15592
OR5M9	6	0.53568	0.63939	1	10643	1	0.32393	0.010381	0.0408	0.759861	1081	3	0.32393
CXCR5	6	0.99675	0.99679	1	21481	0	0.70031	0.010393	0.040843	0.759861	1082	5	0.70031
SPANXD	3	0.98959	0.98972	1	21177	0	0.71988	0.010409	0.027836	0.721337	1083	3	0.71988
ATP1B2	6	0.75969	0.7679	1	14191	1	0.21088	0.010427	0.040941	0.759861	1084	2	0.21088
METTL21A	6	0.89778	0.89791	1	17996	0	0.77125	0.010434	0.040962	0.759861	1085	5	0.77125
STX19	6	0.95211	0.95224	1	19809	0	0.86342	0.010441	0.040985	0.759861	1086	4	0.86342
hsa-mir-7158	4	0.98039	0.98042	1	20809	0	1.2179	0.010457	0.035101	0.749228	1087	4	1.2179	Active
SYPL2	6	0.55913	0.64994	1	10895	1	-0.096311	0.010477	0.041108	0.759861	1088	1	-0.096311
MORN2	6	0.28647	0.4347	1	6779	2	0.55854	0.010484	0.04113	0.759861	1089	3	0.55854
COX7A2L	6	0.80578	0.80643	1	15294	1	0.73758	0.010486	0.041139	0.759861	1090	3	0.73758
DUSP23	6	0.87801	0.87804	1	17405	0	0.789	0.010506	0.041208	0.759861	1091	5	0.789
BCDIN3D	6	0.24625	0.39696	1	6235	1	0.71151	0.010514	0.041238	0.759861	1092	5	0.71151
FER1L6	6	0.89262	0.89275	1	17855	0	0.87491	0.010526	0.041277	0.759861	1093	4	0.87491
CRIPAK	6	0.70185	0.72746	1	13030	1	0.11196	0.010527	0.041279	0.759861	1094	2	0.11196
KRTAP19-2	6	0.92269	0.9229	1	18810	0	1.0539	0.010529	0.041291	0.759861	1095	5	1.0539
MECOM	6	0.56949	0.65483	1	11032	1	0.83733	0.010533	0.041305	0.759861	1096	4	0.83733
ATP8B1	4	0.50832	0.53718	1	10371	1	0.31433	0.010556	0.035429	0.749594	1098	2	0.31433
GC	6	0.99261	0.99263	1	21297	0	0.58962	0.01056	0.041391	0.759861	1099	5	0.58962
ACP5	6	0.12964	0.26196	1	4520	3	0.3123	0.010561	0.041394	0.759861	1100	3	0.3123
SYCP3	6	0.61448	0.67712	1	11633	1	0.94977	0.010564	0.041402	0.759861	1101	5	0.94977
OAF	6	0.94406	0.94421	1	19528	0	0.99514	0.010566	0.041409	0.759861	1102	4	0.99514
CCDC66	6	0.7513	0.76158	1	14017	1	-0.055167	0.010621	0.041588	0.759983	1103	2	-0.055167
ATP9B	6	0.79414	0.79618	1	14996	1	0.916	0.010624	0.041595	0.759983	1104	4	0.916
ING1	6	0.12825	0.25976	1	4491	1	0.66945	0.010646	0.04167	0.759983	1105	4	0.66945
hsa-mir-657	4	0.98934	0.98938	1	21167	0	0.65589	0.010657	0.035732	0.749594	1106	4	0.65589	Active
LHFPL3	6	0.16191	0.31296	1	5141	3	0.052899	0.010658	0.041711	0.759983	1107	3	0.052899
PRKD1	6	0.85999	0.85991	1	16851	0	0.57516	0.01067	0.041742	0.759983	1108	3	0.57516
ASIC3	6	0.99062	0.99064	1	21218	0	0.87875	0.01067	0.041745	0.759983	1109	5	0.87875
ABCD2	6	0.33229	0.47784	1	7461	1	0.67103	0.010685	0.041794	0.759983	1110	5	0.67103
FAM47C	6	0.98233	0.9825	1	20878	0	0.68028	0.010719	0.041909	0.759983	1111	5	0.68028
NSUN5	6	0.54203	0.64223	1	10714	1	0.46007	0.010726	0.041934	0.759983	1112	3	0.46007
APEH	6	0.98863	0.98869	1	21140	0	0.83661	0.010794	0.042152	0.759983	1113	4	0.83661
ST6GALNAC6	6	0.92191	0.92211	1	18777	0	-0.0056938	0.010826	0.042265	0.759983	1114	2	-0.0056938
GLTSCR1L	6	0.96208	0.96208	1	20140	0	0.52199	0.010827	0.042268	0.759983	1115	5	0.52199
MLPH	6	0.99473	0.99476	1	21392	0	0.8895	0.010839	0.0423	0.759983	1116	5	0.8895
CRTAP	6	0.93999	0.94023	1	19399	0	0.67078	0.010869	0.042393	0.759983	1117	3	0.67078
ZNF346	6	0.94735	0.94748	1	19632	0	0.37767	0.010875	0.042413	0.759983	1118	3	0.37767
PPHLN1	6	0.97802	0.97815	1	20709	0	0.8225	0.010879	0.042422	0.759983	1119	4	0.8225
OR1J1	6	0.28392	0.43223	1	6752	1	0.82987	0.010884	0.042437	0.759983	1120	4	0.82987
C2orf71	6	0.12653	0.25701	1	4465	2	0.71273	0.010898	0.042481	0.759983	1121	3	0.71273
GPALPP1	6	0.99157	0.99157	1	21260	0	0.59234	0.010904	0.042499	0.759983	1122	5	0.59234
TPMT	6	0.66687	0.70598	1	12450	1	0.47934	0.010904	0.0425	0.759983	1123	3	0.47934
OLFM2	6	0.76284	0.77032	1	14248	1	0.36896	0.010925	0.042572	0.759983	1124	3	0.36896
IL1RN	6	0.76246	0.77003	1	14243	1	0.94143	0.010928	0.04258	0.759983	1125	4	0.94143
hsa-mir-126	4	0.98905	0.9891	1	21159	0	0.7887	0.010952	0.036624	0.753668	1126	4	0.7887	Active
CDH2	6	0.91654	0.91676	1	18604	0	0.2301	0.010971	0.042728	0.759983	1127	2	0.2301
PIP5K1B	6	0.68824	0.71878	1	12785	1	0.94618	0.010979	0.042754	0.759983	1128	4	0.94618
FKBP5	6	0.92735	0.9276	1	18979	0	0.92593	0.011009	0.042862	0.759983	1129	5	0.92593
SLC16A13	6	0.69008	0.71992	1	12814	1	0.63241	0.011025	0.042906	0.759983	1130	4	0.63241
ZBTB37	6	0.68346	0.71584	1	12717	1	0.91649	0.011027	0.042913	0.759983	1131	4	0.91649
COL4A3	6	0.99221	0.99223	1	21281	0	0.86094	0.011036	0.042944	0.759983	1132	5	0.86094
PNISR	6	0.47029	0.61155	1	10047	1	0.66078	0.011047	0.042975	0.759983	1133	3	0.66078
NUMB	6	0.99333	0.99336	1	21332	0	0.82845	0.011048	0.042977	0.759983	1134	4	0.82845
MN1	6	0.80876	0.80917	1	15372	1	0.65296	0.011061	0.043021	0.759983	1136	5	0.65296
TTC30A	6	0.14558	0.28735	1	4828	1	0.98125	0.011061	0.043021	0.759983	1137	4	0.98125
GLIS2	6	0.991	0.99101	1	21233	0	0.65471	0.011066	0.043042	0.759983	1138	5	0.65471
LDHA	6	0.96169	0.96169	1	20125	0	0.6971	0.011074	0.043066	0.759983	1139	5	0.6971
OPTC	6	0.70189	0.72748	1	13031	1	0.64701	0.011074	0.043068	0.759983	1140	3	0.64701
NR2E3	6	0.08542	0.19031	1	3712	1	0.61736	0.011074	0.04307	0.759983	1141	4	0.61736
RPRD1B	6	0.32251	0.4686	1	7322	2	0.54513	0.011083	0.043096	0.759983	1142	3	0.54513
hsa-mir-4801	3	0.98889	0.98902	1	21153	0	0.85159	0.011108	0.029629	0.734169	1143	3	0.85159	Active
hsa-mir-1184-1	4	0.83853	0.83833	1	16214	0	0.45491	0.011121	0.037169	0.754304	1144	2	0.45491	Active
TFG	6	0.42854	0.5704	1	9188	1	0.84324	0.011126	0.043253	0.762131	1145	4	0.84324
HTR6	6	0.91011	0.91025	1	18404	0	0.16356	0.011154	0.043355	0.762676	1146	2	0.16356
CTDNEP1	6	0.00012367	0.00066887	0.027452	520	3	-1.2559	0.011192	0.043485	0.762676	1147	3	-1.2559		Included
HIST1H2AL	6	0.70631	0.73035	1	13127	1	0.072648	0.011224	0.043591	0.763105	1148	3	0.072648
P2RY10	6	0.99442	0.99445	1	21377	0	0.68549	0.011241	0.043657	0.763105	1150	5	0.68549
ZNF91	6	0.82795	0.82785	1	15905	0	0.69499	0.011243	0.043662	0.763105	1151	3	0.69499
EPO	6	0.95593	0.95595	1	19934	0	0.69188	0.011252	0.043695	0.763105	1152	5	0.69188
OCLN	6	0.7107	0.7332	1	13206	1	0.68656	0.011306	0.043875	0.765299	1153	5	0.68656
EFHB	6	0.73114	0.74701	1	13588	1	1.0452	0.011311	0.043892	0.765299	1154	4	1.0452
HELZ2	6	0.36243	0.50653	1	7959	2	0.94082	0.011364	0.044073	0.766233	1156	4	0.94082
RFPL1	6	0.41754	0.55963	1	8995	2	0.89746	0.011368	0.044086	0.766233	1157	4	0.89746
hsa-mir-6858	4	0.92256	0.92245	1	18806	0	1.0808	0.011407	0.038053	0.754397	1159	3	1.0808	Active
ESRRG	6	0.57594	0.65793	1	11114	1	0.3223	0.011423	0.04427	0.767532	1160	3	0.3223
C1GALT1C1	6	0.99695	0.997	1	21486	0	0.85611	0.01144	0.044316	0.767532	1161	5	0.85611
RNF2	6	0.96449	0.96448	1	20235	0	0.67565	0.011448	0.044344	0.767532	1162	5	0.67565
COX7B2	6	0.9934	0.99343	1	21336	0	1.0424	0.011458	0.044373	0.767532	1163	5	1.0424
FOSL1	6	0.59624	0.66796	1	11391	1	0.22831	0.011472	0.044423	0.767731	1164	3	0.22831
IP6K2	6	0.95175	0.95187	1	19799	0	0.84809	0.011487	0.044481	0.767731	1165	4	0.84809
MFSD6	6	0.83944	0.83936	1	16235	0	0.31567	0.011493	0.044499	0.767731	1166	3	0.31567
APOL3	6	0.52401	0.63425	1	10538	1	0.81391	0.011507	0.04455	0.767731	1167	5	0.81391
CIC	6	0.42211	0.56414	1	9072	2	0.035539	0.011512	0.044562	0.767731	1168	2	0.035539
DEFB113	6	0.37383	0.51743	1	8187	1	0.70855	0.011552	0.044686	0.768664	1169	5	0.70855
RILP	6	0.028956	0.085666	0.701486	2597	3	-0.42227	0.011572	0.044769	0.769467	1170	2	-0.42227
TRIM11	6	0.97136	0.97139	1	20477	0	0.79064	0.01161	0.044892	0.769615	1172	5	0.79064
PDIA5	6	0.29669	0.4442	1	6923	1	0.61287	0.011622	0.044927	0.769615	1173	4	0.61287
CANT1	6	0.99221	0.99223	1	21280	0	0.75308	0.01165	0.045011	0.769615	1174	5	0.75308
ZNF79	6	0.96721	0.9672	1	20328	0	0.67891	0.011653	0.04502	0.769615	1175	5	0.67891
CABP1	6	0.99153	0.99153	1	21258	0	0.77335	0.011654	0.045025	0.769615	1176	5	0.77335
hsa-mir-4648	4	0.98832	0.98837	1	21130	0	0.73417	0.011685	0.03892	0.759107	1177	4	0.73417	Active
CAPNS2	6	0.4357	0.57739	1	9318	2	0.87104	0.011703	0.045181	0.770901	1178	4	0.87104
RAMP2	6	0.90546	0.90557	1	18234	0	0.20763	0.011738	0.045299	0.770901	1179	3	0.20763
RASGRP3	6	0.89346	0.89364	1	17877	0	0.77682	0.011745	0.045324	0.770901	1180	4	0.77682
KRTAP22-2	6	0.97911	0.97925	1	20761	0	0.8499	0.011752	0.045349	0.770901	1181	4	0.8499
RAB3C	6	0.9757	0.97583	1	20617	0	0.64462	0.011806	0.045522	0.772236	1182	5	0.64462
SLC38A10	6	0.94497	0.94512	1	19562	0	0.8257	0.011808	0.045529	0.772236	1183	5	0.8257
CLCN6	6	0.7498	0.76049	1	13985	1	0.36982	0.011821	0.045572	0.772236	1184	3	0.36982
hsa-mir-3926-1	4	0.59181	0.60107	1	11336	1	0.80886	0.011854	0.039445	0.759861	1185	3	0.80886	Active
SOX13	6	0.89956	0.89969	1	18048	0	0.045163	0.01187	0.045739	0.772236	1187	2	0.045163
GABRG2	6	0.37681	0.52028	1	8235	2	0.48529	0.011881	0.045767	0.772236	1188	3	0.48529
OGFOD1	6	0.73345	0.74864	1	13639	1	0.8778	0.011885	0.04578	0.772236	1189	5	0.8778
ANKRD40	6	0.91927	0.91949	1	18691	0	0.63299	0.011905	0.04584	0.772236	1190	5	0.63299
CECR2	6	0.34132	0.48637	1	7608	1	0.90677	0.011933	0.045927	0.772236	1191	5	0.90677
hsa-mir-4483	4	0.98806	0.98812	1	21115	0	0.79437	0.011937	0.039702	0.759861	1192	4	0.79437	Active
HNRPLL	4	0.87088	0.87064	1	17201	0	1.0409	0.011958	0.039768	0.759861	1193	3	1.0409
SULT6B1	6	0.82731	0.8272	1	15889	0	0.62929	0.01196	0.046023	0.772236	1194	3	0.62929
TMEM89	6	0.74498	0.75696	1	13880	1	0.96841	0.011961	0.046024	0.772236	1195	4	0.96841
THOC2	6	0.11713	0.24204	1	4265	2	-0.20778	0.01197	0.046051	0.772236	1196	1	-0.20778
TINAG	6	0.97529	0.97542	1	20601	0	1.0323	0.011979	0.046087	0.772236	1197	4	1.0323
MKNK1	6	0.92205	0.92225	1	18786	0	0.85098	0.011989	0.04612	0.772236	1198	4	0.85098
ARHGAP27	6	0.69966	0.72605	1	12995	1	0.83439	0.011999	0.046151	0.772236	1199	4	0.83439
SPATA31E1	6	0.59447	0.66707	1	11371	1	0.75196	0.012008	0.046177	0.772236	1200	5	0.75196
SYNGR1	6	0.73432	0.74923	1	13653	1	0.48369	0.012025	0.046238	0.772236	1201	3	0.48369
OR2B11	6	0.92195	0.92215	1	18779	0	0.86411	0.012027	0.046244	0.772236	1202	4	0.86411
SPIN4	6	0.98949	0.98955	1	21175	0	0.74808	0.012039	0.04628	0.772236	1203	5	0.74808
DPYD	6	0.99269	0.99271	1	21300	0	0.99732	0.012047	0.0463	0.772236	1204	5	0.99732
ARPP21	6	0.8308	0.83066	1	15985	0	0.60901	0.012062	0.046357	0.772236	1205	5	0.60901
EIF4H	6	0.36751	0.51137	1	8058	2	-0.32695	0.012069	0.046382	0.772236	1206	1	-0.32695
TSPYL6	6	0.97465	0.97476	1	20580	0	0.78539	0.012102	0.046491	0.772236	1207	5	0.78539
hsa-mir-6818	4	0.61411	0.61976	1	11627	1	0.98448	0.012102	0.040212	0.759861	1208	3	0.98448	Active
LDOC1L	6	0.9621	0.9621	1	20141	0	0.7315	0.012109	0.046515	0.772236	1209	3	0.7315
RSU1	6	0.96551	0.96549	1	20273	0	0.48373	0.012111	0.046522	0.772236	1210	4	0.48373
RIC8A	6	0.948	0.94814	1	19654	0	0.38609	0.012119	0.04655	0.772236	1211	3	0.38609
hsa-mir-5691	4	0.98786	0.98791	1	21109	0	0.70169	0.012143	0.040328	0.759861	1212	4	0.70169	Active
SNAI1	6	0.73662	0.7509	1	13697	1	0.63076	0.012146	0.046638	0.772236	1213	3	0.63076
NACC2	6	0.87316	0.87321	1	17266	0	0.90204	0.012159	0.046675	0.772236	1214	4	0.90204
PRX	6	0.10024	0.21474	1	3959	1	0.91242	0.012181	0.046745	0.772236	1215	4	0.91242
C1QTNF7	6	0.63691	0.689	1	11954	1	0.94736	0.012187	0.046766	0.772236	1216	5	0.94736
CD1B	6	0.98372	0.98382	1	20931	0	0.659	0.012191	0.046777	0.772236	1217	5	0.659
INPP1	6	0.95232	0.95243	1	19817	0	0.68628	0.012218	0.046862	0.772236	1218	4	0.68628
hsa-mir-4695	4	0.070186	0.1445	0.953838	3443	1	0.11239	0.01225	0.04067	0.759861	1219	1	0.11239	Active
ZNF675	6	0.73154	0.74729	1	13602	1	0.83149	0.01225	0.046965	0.772236	1220	4	0.83149
TMEM144	6	0.40076	0.54344	1	8667	2	0.81718	0.012256	0.046977	0.772236	1221	4	0.81718
DPEP2	6	0.99507	0.99511	1	21406	0	0.68227	0.012256	0.046982	0.772236	1222	5	0.68227
ABI1	6	0.99604	0.99607	1	21443	0	0.79038	0.012261	0.047001	0.772236	1223	5	0.79038
KRT34	6	0.67238	0.70925	1	12532	1	0.5211	0.012268	0.047027	0.772236	1224	3	0.5211
MBOAT2	6	0.98113	0.98127	1	20831	0	0.95617	0.012275	0.047053	0.772236	1225	5	0.95617
C1orf233	6	0.97865	0.97878	1	20735	0	0.94748	0.012303	0.047159	0.772236	1226	4	0.94748
OSGEPL1	6	0.98499	0.98511	1	20989	0	0.55173	0.012303	0.047159	0.772236	1227	5	0.55173
IQCK	6	0.16701	0.32084	1	5240	3	0.31157	0.012312	0.04719	0.772236	1228	3	0.31157
BLOC1S4	6	0.75302	0.76289	1	14050	1	0.43901	0.012318	0.047211	0.772236	1229	3	0.43901
PASD1	6	0.9416	0.94184	1	19451	0	0.62878	0.012322	0.047224	0.772236	1230	3	0.62878
CCL4L1	5	0.76248	0.76268	1	14244	1	0.8132	0.012335	0.04419	0.767418	1231	3	0.8132
C2orf16	6	0.29358	0.44129	1	6876	2	0.36832	0.012337	0.047278	0.772236	1232	3	0.36832
hsa-mir-4782	4	0.98766	0.9877	1	21098	0	0.59699	0.012342	0.040967	0.759861	1233	4	0.59699	Active
ABCD3	6	0.92262	0.92283	1	18807	0	0.81646	0.012347	0.047305	0.772236	1234	4	0.81646
FGF13	6	0.36167	0.50579	1	7941	2	0.1969	0.012362	0.047354	0.772236	1235	3	0.1969
MRPL44	6	0.0017894	0.0076686	0.137238	1203	4	-1.3798	0.012368	0.047372	0.772236	1236	1	-1.3798
MOGS	6	0.86676	0.86678	1	17069	0	0.6008	0.012378	0.047403	0.772236	1237	5	0.6008
OR5B12	6	0.63141	0.68603	1	11864	1	0.79346	0.012392	0.047455	0.772236	1238	4	0.79346
MYF5	6	0.97639	0.97652	1	20646	0	0.25884	0.012417	0.047541	0.772474	1239	2	0.25884
hsa-mir-29b-2	4	0.66944	0.66994	1	12488	1	0.90172	0.012439	0.04127	0.759861	1240	2	0.90172	Active
NFAT5	6	0.36995	0.5137	1	8110	2	0.15151	0.012467	0.047716	0.773673	1241	2	0.15151
KRT72	6	0.96747	0.96746	1	20336	0	0.63008	0.012486	0.047794	0.773673	1242	3	0.63008
TDRD1	6	0.60422	0.67196	1	11499	1	0.94138	0.012505	0.047861	0.773673	1243	4	0.94138
LOC200726	6	0.42927	0.57108	1	9203	1	0.70103	0.012505	0.047863	0.773673	1244	5	0.70103
SIKE1	6	0.99688	0.99693	1	21485	0	0.97819	0.012508	0.047871	0.773673	1245	5	0.97819
LCE1B	6	0.58997	0.66483	1	11314	1	0.2914	0.012517	0.0479	0.773673	1246	3	0.2914
IL1RAPL1	6	0.9945	0.99453	1	21381	0	0.6608	0.012539	0.047969	0.77421	1247	5	0.6608
hsa-mir-194-1	4	0.98745	0.98748	1	21092	0	0.79709	0.012554	0.041595	0.759983	1248	4	0.79709	Active
hsa-mir-6503	4	0.98744	0.98748	1	21091	0	0.73196	0.012557	0.041601	0.759983	1249	4	0.73196	Active
SLC30A3	6	0.87717	0.8772	1	17377	0	0.81192	0.012565	0.048064	0.774573	1250	3	0.81192
ZNF117	6	0.030031	0.088418	0.716183	2625	1	0.24654	0.012569	0.048074	0.774573	1251	3	0.24654
ASRGL1	6	0.89509	0.89523	1	17922	0	0.093214	0.012576	0.048099	0.774573	1252	3	0.093214
GNB1	6	0.23602	0.3875	1	6108	2	0.37517	0.012616	0.048242	0.775732	1253	3	0.37517
IL26	6	0.39004	0.53311	1	8467	1	0.85965	0.012632	0.048297	0.776048	1254	4	0.85965
SPATS2	6	0.18443	0.34023	1	5491	1	0.65213	0.012648	0.048346	0.77625	1255	5	0.65213
HKDC1	6	0.88697	0.88702	1	17690	0	0.80629	0.012661	0.04839	0.776386	1256	4	0.80629
DAB1	6	0.52619	0.6352	1	10556	1	0.78418	0.012694	0.048504	0.77706	1257	4	0.78418
AP1S3	6	0.73003	0.74621	1	13569	1	-0.1167	0.012715	0.048577	0.777495	1258	2	-0.1167
CALB2	6	0.98248	0.98264	1	20885	0	0.97127	0.012755	0.048728	0.777495	1259	4	0.97127
RASA1	6	0.095414	0.20682	1	3873	2	0.35834	0.012765	0.048765	0.777495	1260	3	0.35834
hsa-mir-519e	3	0.98723	0.98736	1	21083	0	0.88709	0.012771	0.033783	0.74599	1261	3	0.88709	Active
PSORS1C1	6	0.2763	0.42521	1	6642	1	0.8708	0.012791	0.048841	0.777495	1262	5	0.8708
MAN1C1	6	0.84796	0.84785	1	16483	0	0.75635	0.012815	0.048922	0.777495	1263	4	0.75635
SCRN3	6	0.66657	0.70579	1	12446	1	0.8903	0.012817	0.048927	0.777495	1264	4	0.8903
DVL1	6	0.90263	0.90274	1	18143	0	0.84016	0.012818	0.048931	0.777495	1265	5	0.84016
KIAA0907	6	0.99704	0.99709	1	21492	0	0.86063	0.012843	0.049015	0.777495	1266	5	0.86063
SLC35D1	6	0.80528	0.80596	1	15280	1	0.6827	0.012858	0.049064	0.777495	1267	5	0.6827
CECR5	6	0.55959	0.65014	1	10900	1	0.39138	0.012865	0.049083	0.777495	1268	3	0.39138
DUSP10	6	0.98602	0.98612	1	21030	0	0.72179	0.012869	0.049099	0.777495	1269	5	0.72179
PLCL1	6	0.68273	0.71541	1	12703	1	0.56639	0.012886	0.049157	0.777495	1270	3	0.56639
NUDT6	6	0.89532	0.89545	1	17930	0	0.54294	0.012887	0.049159	0.777495	1271	5	0.54294
HSD17B4	6	0.89615	0.8963	1	17949	0	0.87321	0.012892	0.049172	0.777495	1272	5	0.87321
KLHL34	6	0.79179	0.79415	1	14940	1	0.77072	0.012893	0.049175	0.777495	1273	4	0.77072
CLEC2A	6	0.99569	0.99574	1	21432	0	0.90793	0.012914	0.049248	0.777825	1274	5	0.90793
C10orf11	6	0.36993	0.51369	1	8109	2	0.55551	0.01292	0.049268	0.777825	1275	3	0.55551
NCF2	6	0.93969	0.93991	1	19384	0	0.97557	0.012931	0.049306	0.777865	1276	4	0.97557
SMPD3	6	0.87835	0.87838	1	17419	0	0.31319	0.012964	0.049427	0.778304	1277	3	0.31319
hsa-mir-4763	4	0.91909	0.91893	1	18683	0	1.1241	0.012968	0.042849	0.759983	1278	3	1.1241	Active
TM9SF3	6	0.99621	0.99626	1	21455	0	0.75782	0.012969	0.049445	0.778304	1279	5	0.75782
FXYD1	6	0.49357	0.62131	1	10243	1	0.87909	0.012987	0.049504	0.778304	1280	4	0.87909
PAF1	6	0.18819	0.34365	1	5536	2	0.28447	0.013001	0.049549	0.778304	1281	3	0.28447
PTGDS	6	0.60399	0.67183	1	11496	1	1.0275	0.013015	0.04959	0.778304	1282	4	1.0275
ALLC	6	0.88679	0.88684	1	17684	0	0.76134	0.013021	0.049608	0.778304	1283	4	0.76134
CLN5	6	0.17779	0.33418	1	5422	1	0.8903	0.013025	0.049621	0.778304	1284	4	0.8903
hsa-mir-3927	4	0.39663	0.46376	1	8590	1	0.90594	0.013033	0.043052	0.759983	1285	2	0.90594	Active
hsa-mir-4682	4	0.90647	0.9063	1	18273	0	0.85171	0.013051	0.043097	0.759983	1286	3	0.85171	Active
FAM20C	6	0.18484	0.34062	1	5494	2	0.23673	0.013062	0.049748	0.779196	1287	2	0.23673
CLASP1	6	0.76192	0.76961	1	14230	1	0.6477	0.013063	0.04975	0.779196	1288	4	0.6477
LPGAT1	6	0.14324	0.28368	1	4781	1	0.71644	0.013093	0.049847	0.779592	1289	5	0.71644
ADH1A	6	0.31843	0.46474	1	7245	2	0.50501	0.013113	0.049915	0.779767	1290	4	0.50501
LOXL1	6	0.97386	0.97394	1	20555	0	0.67728	0.013136	0.049988	0.779767	1291	5	0.67728
EFNB1	6	0.96589	0.96588	1	20283	0	0.89523	0.013144	0.050011	0.779767	1292	4	0.89523
hsa-mir-6839	4	0.98685	0.98685	1	21069	0	0.57946	0.013151	0.043396	0.762676	1293	4	0.57946	Active
LCN2	6	0.85064	0.85054	1	16564	0	0.061644	0.013163	0.05007	0.779767	1294	2	0.061644
MMP7	6	0.9834	0.98353	1	20918	0	0.59812	0.013164	0.050072	0.779767	1295	5	0.59812
HSPB2	6	0.96075	0.96074	1	20084	0	0.44309	0.013165	0.050073	0.779767	1296	4	0.44309
hsa-mir-23a	4	0.78084	0.78072	1	14680	0	1.0334	0.013187	0.043495	0.762676	1297	3	1.0334	Active
AHSP	6	0.57687	0.65839	1	11123	1	0.71614	0.013191	0.050172	0.779843	1298	5	0.71614
DIP2A	6	0.23114	0.38297	1	6040	2	0.40056	0.013204	0.050209	0.779843	1299	3	0.40056
CNN3	6	0.99255	0.99256	1	21294	0	0.79571	0.01321	0.050224	0.779843	1300	5	0.79571
CTTNBP2	6	0.9645	0.96449	1	20236	0	0.85572	0.013226	0.050276	0.779843	1301	4	0.85572
HSPB9	6	0.28863	0.4367	1	6803	2	0.75335	0.013245	0.05033	0.779843	1302	4	0.75335
SCN9A	6	0.9099	0.91003	1	18395	0	0.8423	0.013271	0.050417	0.780079	1303	4	0.8423
GYLTL1B	6	0.75828	0.76684	1	14164	1	0.70619	0.013283	0.050456	0.78013	1304	3	0.70619
OCM	6	0.93422	0.93445	1	19196	0	0.8026	0.013296	0.050503	0.780293	1305	4	0.8026
KRTAP13-1	6	0.33805	0.48325	1	7553	2	0.3667	0.013312	0.050552	0.780506	1306	3	0.3667
ROBO1	6	0.86981	0.86983	1	17167	0	0.62109	0.013336	0.050633	0.780721	1307	3	0.62109
CBFA2T2	6	0.80128	0.80232	1	15175	1	0.95688	0.013347	0.050665	0.780721	1308	5	0.95688
BTG1	6	0.1381	0.27548	1	4685	3	0.25578	0.013352	0.050681	0.780721	1309	3	0.25578
TTC22	6	0.061954	0.15088	0.977732	3294	2	0.24574	0.013361	0.05071	0.780721	1310	2	0.24574
CLCN5	6	0.97636	0.97648	1	20645	0	0.88334	0.013399	0.050828	0.781174	1311	5	0.88334
DOLPP1	6	0.0032689	0.013542	0.201071	1449	4	-1.1064	0.013411	0.050874	0.781174	1312	1	-1.1064
MSANTD1	6	0.98083	0.98097	1	20824	0	0.75947	0.013418	0.050895	0.781174	1313	5	0.75947
RBMS1	6	0.51239	0.62918	1	10416	1	-0.0028267	0.013426	0.05092	0.781174	1314	2	-0.0028267
PLA2G2F	6	0.86667	0.86669	1	17068	0	0.17882	0.013461	0.051034	0.782328	1315	3	0.17882
SLC6A5	6	0.8739	0.87396	1	17284	0	0.72686	0.013485	0.051115	0.782328	1316	5	0.72686
KCNC4	6	0.98039	0.98053	1	20808	0	0.84262	0.013489	0.051128	0.782328	1317	5	0.84262
hsa-mir-556	3	0.9865	0.98664	1	21055	0	0.83424	0.013495	0.035591	0.749594	1318	3	0.83424	Active
GNG3	6	0.9946	0.99463	1	21387	0	0.4763	0.01351	0.051201	0.782328	1319	3	0.4763
KIAA1551	6	0.95529	0.95534	1	19907	0	0.84776	0.013511	0.051203	0.782328	1320	4	0.84776
PPEF1	6	0.40293	0.54554	1	8705	1	0.82762	0.01352	0.051231	0.782328	1321	4	0.82762
AMTN	6	0.70191	0.72748	1	13032	1	0.7844	0.013524	0.051247	0.782328	1322	4	0.7844
C3orf52	6	0.99402	0.99405	1	21365	0	0.75725	0.01356	0.051365	0.783134	1323	5	0.75725
PLEKHG1	6	0.99349	0.99352	1	21339	0	0.84381	0.013591	0.051476	0.783465	1324	4	0.84381
MOV10	6	0.69263	0.7215	1	12861	1	0.5693	0.013595	0.051488	0.783465	1325	5	0.5693
CLN6	6	0.98974	0.9898	1	21182	0	0.82804	0.013626	0.051583	0.783595	1326	5	0.82804
OR13J1	6	0.5447	0.64345	1	10740	1	0.88007	0.013648	0.051661	0.783675	1327	4	0.88007
JAKMIP2	6	0.96537	0.96535	1	20267	0	0.74921	0.013653	0.051674	0.783675	1328	5	0.74921
MOBP	6	0.93692	0.93714	1	19294	0	0.38289	0.013659	0.051696	0.783675	1329	2	0.38289
MET	6	0.75545	0.76467	1	14106	1	0.073303	0.013709	0.051856	0.785546	1330	1	0.073303
UTS2B	6	0.098583	0.21199	1	3928	1	0.77022	0.013739	0.051942	0.78588	1331	4	0.77022
TICAM1	6	0.51569	0.63062	1	10444	1	0.76669	0.013778	0.052072	0.786173	1332	5	0.76669
PRDM2	6	0.99391	0.99394	1	21356	0	0.64502	0.013802	0.052154	0.786173	1333	5	0.64502
TGFB1	6	0.70145	0.72719	1	13023	1	0.83747	0.013808	0.052177	0.786173	1334	4	0.83747
ART1	6	0.20812	0.36196	1	5776	2	0.48685	0.013836	0.052266	0.786173	1335	3	0.48685
SETX	6	0.9439	0.94406	1	19524	0	0.70381	0.013841	0.052282	0.786173	1336	5	0.70381
MAT2B	6	0.97982	0.97997	1	20790	0	0.59045	0.013844	0.052286	0.786173	1337	5	0.59045
B4GALT6	6	0.85111	0.851	1	16579	0	0.86831	0.01387	0.05237	0.786173	1338	5	0.86831
THNSL2	6	0.84013	0.84002	1	16256	0	0.0094689	0.013908	0.052505	0.786173	1339	2	0.0094689
EXOSC1	6	0.80103	0.80212	1	15168	1	0.58776	0.013941	0.052623	0.786173	1340	3	0.58776
EXT1	6	0.45228	0.5938	1	9650	2	0.50469	0.013941	0.052623	0.786173	1341	3	0.50469
SOX5	6	0.99053	0.99055	1	21214	0	0.88518	0.013949	0.052645	0.786173	1342	5	0.88518
FAM206A	6	0.99225	0.99228	1	21282	0	0.88165	0.013955	0.052662	0.786173	1343	4	0.88165
GPR157	6	0.48874	0.61932	1	10203	1	0.64285	0.013957	0.05267	0.786173	1344	4	0.64285
COL2A1	6	0.95864	0.95862	1	20030	0	0.8272	0.013969	0.052706	0.786173	1345	4	0.8272
GDAP1	6	0.70559	0.72989	1	13110	1	0.45764	0.013969	0.052706	0.786173	1346	3	0.45764
STX11	6	0.91893	0.91915	1	18677	0	0.98974	0.013978	0.05273	0.786173	1347	4	0.98974
AHCYL1	6	0.0022932	0.009711	0.15886	1309	4	-1.3136	0.014007	0.052822	0.786406	1348	1	-1.3136
NLRP7	6	0.9481	0.94824	1	19662	0	0.54253	0.014011	0.052836	0.786406	1349	3	0.54253
CCDC88A	6	0.97404	0.97412	1	20560	0	0.861	0.014023	0.052868	0.786406	1350	4	0.861
hsa-mir-548e	4	0.77658	0.77651	1	14574	0	0.83949	0.01404	0.0461	0.772236	1351	3	0.83949	Active
PDLIM2	6	0.88893	0.88899	1	17745	0	0.77269	0.01406	0.052988	0.78726	1352	3	0.77269
TTC38	6	0.76671	0.77338	1	14345	1	0.63952	0.014075	0.053047	0.78726	1353	4	0.63952
hsa-mir-548f-2	4	0.8691	0.86887	1	17140	0	0.92413	0.014088	0.04626	0.772236	1354	3	0.92413	Active
AGAP11	6	0.79911	0.80044	1	15109	1	0.77321	0.014106	0.053129	0.78726	1355	4	0.77321
ZNF831	6	0.99489	0.99492	1	21397	0	0.60774	0.014111	0.053146	0.78726	1356	5	0.60774
ABO	6	0.89662	0.89677	1	17961	0	0.64174	0.014121	0.053181	0.78726	1357	3	0.64174
ITGB4	6	0.99041	0.99044	1	21206	0	0.58973	0.014138	0.053238	0.78726	1358	5	0.58973
CNOT6	6	0.60962	0.67463	1	11570	1	0.52142	0.014149	0.053273	0.78726	1359	5	0.52142
SUV39H1	6	0.99711	0.99715	1	21497	0	0.92188	0.014159	0.053311	0.78726	1360	5	0.92188
PHYHIP	6	0.99353	0.99356	1	21341	0	0.86578	0.014203	0.053466	0.788162	1361	5	0.86578
KIF16B	6	0.88092	0.88098	1	17507	0	0.38042	0.014205	0.053472	0.788162	1362	3	0.38042
PLAGL1	6	0.44917	0.59074	1	9590	2	0.85956	0.014216	0.053505	0.788162	1363	4	0.85956
hsa-mir-944	3	0.98577	0.9859	1	21018	0	0.96197	0.014235	0.037422	0.754304	1364	3	0.96197	Active
RABEP2	6	0.49902	0.62356	1	10287	1	0.98286	0.014239	0.053577	0.788162	1365	4	0.98286
NUDCD2	6	0.89529	0.89542	1	17929	0	0.85537	0.014241	0.053582	0.788162	1366	4	0.85537
PSMD13	6	0.021193	0.065221	0.599339	2321	4	-0.85946	0.014255	0.053626	0.788162	1367	2	-0.85946
DEAF1	6	0.96501	0.96501	1	20253	0	0.86783	0.014259	0.053638	0.788162	1368	4	0.86783
KLF12	6	0.99288	0.99291	1	21313	0	0.91959	0.014273	0.053688	0.788162	1369	5	0.91959
TMEM206	6	0.33591	0.4812	1	7516	2	0.67541	0.014287	0.053735	0.788162	1370	4	0.67541
SLC25A47	6	0.81193	0.81211	1	15460	1	1.0475	0.014344	0.053921	0.789307	1371	5	1.0475
CASP10	6	0.94183	0.94204	1	19459	0	0.74149	0.014354	0.053958	0.789307	1372	4	0.74149
QKI	6	0.99562	0.99566	1	21431	0	0.74407	0.014354	0.053959	0.789307	1373	5	0.74407
HIST1H3C	6	0.1339	0.26878	1	4606	2	0.3854	0.014372	0.054021	0.789364	1374	3	0.3854
FAM98A	6	0.48684	0.61855	1	10189	1	0.87731	0.014378	0.054035	0.789364	1375	4	0.87731
PCDHB12	6	0.91085	0.91099	1	18427	0	0.67629	0.014395	0.054097	0.789694	1376	5	0.67629
RTP1	6	0.53038	0.63709	1	10598	1	0.61482	0.014404	0.05413	0.789694	1377	3	0.61482
CASC1	6	0.361	0.50514	1	7926	1	0.96201	0.014415	0.054169	0.789722	1378	5	0.96201
LZTS1	6	0.32852	0.47424	1	7408	1	0.63997	0.014429	0.054213	0.789843	1379	3	0.63997
RNF111	6	0.303	0.45013	1	7012	2	0.18816	0.014454	0.054293	0.790159	1380	3	0.18816
hsa-mir-6863	4	0.49173	0.5255	1	10230	1	0.88389	0.014461	0.047404	0.772236	1381	2	0.88389	Active
LSM1	6	0.92606	0.92629	1	18933	0	0.77224	0.014465	0.054323	0.790159	1382	4	0.77224
DISC1	4	0.97864	0.97871	1	20734	0	0.75381	0.014471	0.047431	0.772236	1383	3	0.75381
PTH	6	0.84437	0.84425	1	16387	0	0.21061	0.014472	0.054344	0.790159	1384	3	0.21061
POU5F1B	6	0.73425	0.74919	1	13652	1	0.37249	0.014486	0.054395	0.790373	1385	3	0.37249
AP1AR	4	0.7327	0.73267	1	13626	0	0.52912	0.014503	0.047532	0.772474	1386	2	0.52912
EHBP1	6	0.80548	0.80614	1	15289	1	0.80988	0.014504	0.054445	0.790566	1387	5	0.80988
CDH26	6	0.72462	0.7425	1	13458	1	0.81091	0.014548	0.054592	0.790738	1388	4	0.81091
GPT2	6	0.97732	0.97744	1	20683	0	0.7371	0.014551	0.054601	0.790738	1389	5	0.7371
USP32	6	0.42241	0.56444	1	9079	2	0.86172	0.01456	0.05463	0.790738	1390	4	0.86172
SULT1E1	6	0.75579	0.76493	1	14115	1	0.78617	0.014567	0.054651	0.790738	1391	4	0.78617
MAPK11	6	0.99129	0.9913	1	21250	0	0.58056	0.014577	0.054685	0.790738	1392	5	0.58056
FAH	6	0.98301	0.98314	1	20903	0	0.82384	0.014602	0.054761	0.790738	1393	4	0.82384
LCA5	6	0.85212	0.852	1	16609	0	0.03458	0.014602	0.054763	0.790738	1394	2	0.03458
CNBP	6	0.16589	0.31915	1	5215	3	-0.033904	0.014652	0.054937	0.790738	1395	3	-0.033904
B4GALT4	6	0.34884	0.49361	1	7735	2	0.72352	0.014676	0.055023	0.790738	1396	4	0.72352
CLDN10	6	0.96482	0.96481	1	20246	0	0.57531	0.014688	0.055061	0.790738	1397	3	0.57531
TMEM136	6	0.55298	0.64716	1	10821	1	0.30553	0.014702	0.055109	0.790738	1399	3	0.30553
ADK	6	0.81448	0.81459	1	15536	1	-0.18757	0.014723	0.055179	0.790738	1400	2	-0.18757
TIMM8A	6	0.99667	0.9967	1	21477	0	0.64293	0.014724	0.055183	0.790738	1401	5	0.64293
E2F1	6	0.6232	0.68174	1	11750	1	0.5658	0.01473	0.055201	0.790738	1402	3	0.5658
RNFT2	6	0.74745	0.75879	1	13929	1	0.80774	0.014748	0.055256	0.790738	1403	4	0.80774
C6orf89	6	0.91628	0.9165	1	18590	0	0.61236	0.014749	0.055258	0.790738	1404	5	0.61236
PRAMEF1	6	0.73603	0.75047	1	13686	1	0.83757	0.014762	0.055299	0.790791	1405	5	0.83757
hsa-mir-147a	4	0.75641	0.75637	1	14127	0	0.88764	0.014808	0.048469	0.77706	1406	2	0.88764	Active
CR2	6	0.82969	0.82953	1	15955	0	0.44295	0.014824	0.055492	0.79207	1407	3	0.44295
HNF1A	6	0.37115	0.51484	1	8130	2	0.30847	0.014839	0.055529	0.79207	1408	3	0.30847
TCEA2	6	0.25001	0.40045	1	6292	2	-0.015606	0.014851	0.055564	0.79207	1409	2	-0.015606
ZNF454	6	0.94991	0.95002	1	19728	0	0.85252	0.014856	0.055583	0.79207	1410	4	0.85252
hsa-mir-181b-1	4	0.87929	0.87915	1	17449	0	0.81031	0.014878	0.048707	0.777495	1411	2	0.81031	Active
RHCE	6	0.32467	0.4706	1	7353	2	0.48346	0.014896	0.055731	0.79207	1412	3	0.48346
CHSY3	6	0.7851	0.78849	1	14780	1	0.18392	0.0149	0.055745	0.79207	1413	1	0.18392
TTC12	6	0.93173	0.93196	1	19125	0	0.31652	0.014925	0.055821	0.79207	1414	3	0.31652
OR1L1	6	0.91133	0.9115	1	18444	0	0.60367	0.014927	0.055826	0.79207	1415	3	0.60367
hsa-mir-4694	4	0.92242	0.92231	1	18801	0	0.69865	0.014934	0.048872	0.777495	1416	2	0.69865	Active
CORT	6	0.92518	0.92542	1	18906	0	0.75683	0.01495	0.055899	0.792257	1417	4	0.75683
NUP85	6	0.017015	0.053854	0.529463	2184	4	-0.95414	0.014954	0.055912	0.792257	1418	2	-0.95414
DBX2	6	0.63374	0.6873	1	11903	1	0.46735	0.014998	0.056063	0.792721	1419	3	0.46735
LOC440335	5	0.10483	0.22041	1	4045	2	0.16323	0.014998	0.051548	0.783595	1420	2	0.16323
RASAL1	6	0.86701	0.86702	1	17079	0	0.85433	0.015004	0.056087	0.792721	1421	4	0.85433
TMEM260	6	0.64446	0.69319	1	12079	1	0.93692	0.015005	0.056088	0.792721	1422	4	0.93692
BICD1	6	0.94805	0.9482	1	19657	0	0.92898	0.015026	0.056161	0.793076	1423	4	0.92898
ZSCAN21	6	0.97189	0.97194	1	20493	0	0.68184	0.015049	0.056235	0.793076	1424	5	0.68184
BAIAP2L2	6	0.8125	0.81267	1	15475	1	0.84027	0.015049	0.056236	0.793076	1425	4	0.84027
DRP2	6	0.99635	0.99639	1	21461	0	0.97182	0.015072	0.056307	0.793076	1426	4	0.97182
NPVF	6	0.77917	0.78352	1	14639	1	0.16798	0.015078	0.056326	0.793076	1427	2	0.16798
ZNF382	6	0.72379	0.74196	1	13435	1	0.55956	0.015087	0.056356	0.793076	1428	5	0.55956
CCDC89	6	0.97906	0.97919	1	20757	0	0.72128	0.015112	0.056432	0.793076	1429	5	0.72128
RPUSD1	6	0.96966	0.96968	1	20422	0	0.77301	0.015116	0.056445	0.793076	1430	5	0.77301
hsa-mir-4268	4	0.98486	0.98485	1	20985	0	0.60675	0.015144	0.049517	0.778304	1431	4	0.60675	Active
SH3D21	6	0.30948	0.45624	1	7114	2	0.3285	0.015158	0.056598	0.793173	1432	3	0.3285
TUSC5	6	0.58536	0.66256	1	11243	1	0.77751	0.015191	0.056708	0.793173	1433	5	0.77751
hsa-mir-4659a	3	0.98479	0.98495	1	20982	0	0.63894	0.015206	0.039826	0.759861	1434	3	0.63894	Active
LEPREL4	6	0.94343	0.94358	1	19508	0	0.57896	0.01522	0.056792	0.793173	1435	5	0.57896
HLA-DMB	6	0.14879	0.29238	1	4874	1	0.59336	0.015229	0.056818	0.793173	1436	3	0.59336
KIF3A	6	0.44921	0.59077	1	9593	1	0.62982	0.015236	0.056837	0.793173	1437	3	0.62982
USP3	6	0.78548	0.7888	1	14787	1	0.7971	0.015239	0.056844	0.793173	1438	5	0.7971
ZNF408	6	0.78023	0.78439	1	14661	1	0.6895	0.01524	0.056846	0.793173	1439	5	0.6895
LXN	6	0.80238	0.80334	1	15208	1	0.59798	0.015247	0.056867	0.793173	1440	4	0.59798
NEU3	6	0.4539	0.5954	1	9682	2	0.83201	0.015251	0.056882	0.793173	1441	4	0.83201
hsa-mir-450b	4	0.98474	0.98475	1	20980	0	0.82827	0.015255	0.049825	0.779592	1442	4	0.82827	Active
hsa-mir-4536-1	3	0.89517	0.89526	1	17926	0	1.1512	0.015265	0.039972	0.759861	1443	2	1.1512	Active
BBIP1	6	0.94626	0.94639	1	19603	0	0.593	0.015296	0.057028	0.793173	1444	5	0.593
SCNN1A	6	0.92353	0.92373	1	18838	0	0.46929	0.015297	0.057031	0.793173	1445	3	0.46929
SMARCA1	6	0.98259	0.98274	1	20889	0	0.7718	0.015301	0.057044	0.793173	1446	5	0.7718
TXLNB	6	0.85236	0.85224	1	16614	0	0.73792	0.015308	0.057063	0.793173	1447	3	0.73792
CES5A	6	0.81947	0.81944	1	15673	1	0.88212	0.015308	0.057065	0.793173	1448	5	0.88212
C5orf20	6	0.97126	0.97129	1	20475	0	0.81649	0.015311	0.057073	0.793173	1449	4	0.81649
UBE2V1	6	0.41131	0.55361	1	8876	1	0.70267	0.015329	0.057121	0.793337	1450	3	0.70267
RMDN1	6	0.94594	0.94607	1	19591	0	0.54222	0.01534	0.057159	0.793361	1451	5	0.54222
GTF2IRD1	6	0.99352	0.99355	1	21340	0	0.52757	0.015382	0.0573	0.794058	1452	5	0.52757
FAM21B	6	0.28167	0.43015	1	6720	2	0.3893	0.015397	0.057353	0.794058	1453	3	0.3893
SCLT1	6	0.98632	0.9864	1	21045	0	0.65349	0.015404	0.057377	0.794058	1454	5	0.65349
ST7	6	0.99637	0.99641	1	21462	0	0.65312	0.01541	0.057392	0.794058	1455	5	0.65312
hsa-mir-3910-1	4	0.96675	0.96669	1	20314	0	0.89193	0.015437	0.050384	0.780079	1456	3	0.89193	Active
NTAN1	6	0.9583	0.95828	1	20017	0	0.67928	0.015478	0.057617	0.794556	1457	5	0.67928
EIF3E	6	0.87344	0.8735	1	17272	0	0.56066	0.015495	0.057675	0.794556	1458	3	0.56066
OR10AD1	6	0.89598	0.89614	1	17939	0	0.84742	0.015516	0.057756	0.794556	1459	4	0.84742
SPCS1	6	0.040046	0.11289	0.825714	2919	2	0.52216	0.015524	0.057784	0.794556	1460	4	0.52216
ATP6V1B1	6	0.9456	0.94574	1	19580	0	0.28558	0.015594	0.058011	0.794556	1461	3	0.28558
ABI3	6	0.2761	0.42503	1	6641	1	0.4576	0.015607	0.058055	0.794556	1462	3	0.4576
MT1X	5	0.21153	0.33637	1	5814	2	-0.17974	0.015619	0.053299	0.78726	1463	1	-0.17974
OAZ2	6	0.9649	0.96489	1	20249	0	0.7244	0.015643	0.058163	0.794556	1464	3	0.7244
TRAM2	6	0.98748	0.98753	1	21093	0	0.34495	0.015672	0.058259	0.794556	1465	2	0.34495
TRPM7	6	0.91221	0.91242	1	18468	0	0.80376	0.015674	0.058263	0.794556	1466	4	0.80376
TRA2A	6	0.93269	0.93292	1	19155	0	0.74577	0.01568	0.05828	0.794556	1467	5	0.74577
UBALD1	6	0.45714	0.59858	1	9757	1	0.89377	0.015688	0.058301	0.794556	1468	4	0.89377
TRIM32	6	0.90931	0.90944	1	18375	0	0.71274	0.015694	0.058316	0.794556	1469	4	0.71274
BLID	6	0.84234	0.84225	1	16326	0	0.83744	0.015703	0.058348	0.794556	1470	4	0.83744
GNAI2	6	0.64285	0.69227	1	12049	1	0.83209	0.015705	0.058354	0.794556	1471	4	0.83209
OTOP3	6	0.8098	0.81013	1	15405	1	0.27543	0.015743	0.058466	0.794556	1472	2	0.27543
hsa-mir-3650	4	0.98425	0.98425	1	20956	0	0.64177	0.015746	0.051372	0.783134	1473	4	0.64177	Active
P4HA2	6	0.80971	0.81004	1	15403	1	0.58507	0.015753	0.058504	0.794556	1474	5	0.58507
FOXN2	6	0.41707	0.55916	1	8986	1	0.94996	0.015759	0.058524	0.794556	1475	4	0.94996
TBC1D5	6	0.9127	0.9129	1	18484	0	0.87538	0.01577	0.058571	0.794556	1476	5	0.87538
HABP4	6	0.99617	0.99621	1	21449	0	0.81892	0.015805	0.058675	0.794556	1477	4	0.81892
hsa-mir-548ba	1	0.98419	0.98421	1	20953	0	2.1704	0.01581	0.015724	0.634464	1478	1	2.1704	Active
HDHD1	6	0.94774	0.94789	1	19643	0	0.81818	0.015827	0.058734	0.794556	1479	5	0.81818
JMY	6	0.98018	0.98032	1	20798	0	0.63615	0.015835	0.058763	0.794556	1480	3	0.63615
HIST1H4F	6	0.81666	0.81669	1	15591	1	0.018944	0.015842	0.058783	0.794556	1481	2	0.018944
LEAP2	6	0.98815	0.98821	1	21120	0	0.85254	0.015858	0.058837	0.794556	1482	4	0.85254
SEPHS1	6	0.6975	0.72463	1	12949	1	0.73118	0.015862	0.058851	0.794556	1483	5	0.73118
ARHGAP29	6	0.5828	0.66128	1	11202	1	0.59098	0.015884	0.058924	0.794556	1484	3	0.59098
VAMP4	6	0.92876	0.929	1	19026	0	0.70816	0.015887	0.058935	0.794556	1485	3	0.70816
FGF5	6	0.87557	0.87563	1	17323	0	0.40361	0.015892	0.058948	0.794556	1486	3	0.40361
BCL7B	6	0.46449	0.60585	1	9924	1	0.84297	0.015899	0.058971	0.794556	1487	4	0.84297
AP1G2	6	0.99613	0.99617	1	21448	0	0.63676	0.015908	0.05901	0.794556	1488	5	0.63676
ELOVL6	6	0.98329	0.98342	1	20915	0	0.6277	0.015929	0.059073	0.794556	1489	5	0.6277
BPIFB1	6	0.71769	0.73788	1	13323	1	0.94648	0.015935	0.059095	0.794556	1490	4	0.94648
SPACA1	6	0.99077	0.99078	1	21226	0	0.66006	0.015946	0.059125	0.794556	1491	5	0.66006
TRIM68	6	0.95038	0.95049	1	19752	0	0.3012	0.015947	0.059127	0.794556	1492	3	0.3012
WWC3	6	0.9349	0.93512	1	19220	0	0.57767	0.015969	0.059205	0.794556	1493	5	0.57767
UQCRFS1	6	0.0079849	0.028733	0.340455	1806	3	-0.46091	0.015991	0.059271	0.794556	1494	2	-0.46091
hsa-mir-1539	4	0.90777	0.90759	1	18323	0	0.75344	0.015991	0.052141	0.786173	1495	2	0.75344	Active
ADPRHL2	6	0.93946	0.93968	1	19379	0	0.65335	0.015995	0.059285	0.794556	1496	5	0.65335
ALDH3A2	6	0.93231	0.93255	1	19142	0	0.70706	0.016001	0.059304	0.794556	1497	5	0.70706
CLK4	6	0.69074	0.72034	1	12832	1	0.38239	0.016007	0.059321	0.794556	1498	3	0.38239
MTX1	6	0.67748	0.71228	1	12618	1	0.80979	0.016039	0.059429	0.794556	1499	5	0.80979
GTPBP2	6	0.41809	0.56018	1	8999	2	-0.26031	0.01604	0.059432	0.794556	1500	1	-0.26031
CSTB	6	0.99113	0.99115	1	21244	0	0.68362	0.016051	0.059464	0.794556	1501	5	0.68362
SLC28A3	6	0.8106	0.81089	1	15421	1	0.83043	0.016064	0.059503	0.794556	1502	4	0.83043
GIMAP8	6	0.55559	0.64836	1	10845	1	0.53742	0.01609	0.059575	0.794556	1503	4	0.53742
CA1	6	0.77373	0.77906	1	14499	1	0.92183	0.016098	0.059596	0.794556	1504	4	0.92183
ZNF423	6	0.93456	0.93479	1	19209	0	0.7463	0.016119	0.059665	0.794556	1505	4	0.7463
hsa-mir-4691	4	0.78564	0.78555	1	14793	0	0.70912	0.016131	0.052557	0.786173	1506	2	0.70912	Active
hsa-mir-3133	3	0.98386	0.98398	1	20938	0	0.71374	0.016145	0.042141	0.759983	1507	3	0.71374	Active
SH3TC1	6	0.93007	0.93031	1	19073	0	0.67612	0.016156	0.059781	0.794556	1508	5	0.67612
OR4C13	6	0.35055	0.49526	1	7764	1	0.46256	0.016157	0.059785	0.794556	1509	3	0.46256
RILPL2	6	0.68114	0.71446	1	12679	1	1.0091	0.016158	0.059792	0.794556	1510	4	1.0091
ITGA4	6	0.74001	0.75333	1	13776	1	0.50427	0.016172	0.059832	0.794556	1511	3	0.50427
CCDC102B	6	0.94414	0.94429	1	19533	0	0.75705	0.016175	0.059841	0.794556	1512	5	0.75705
PRELP	6	0.94605	0.94617	1	19595	0	0.58541	0.016189	0.059884	0.794556	1513	4	0.58541
EDC3	6	0.94884	0.94895	1	19693	0	0.68559	0.01619	0.059888	0.794556	1514	4	0.68559
DCAF16	6	0.96416	0.96415	1	20221	0	0.84485	0.016201	0.059917	0.794556	1515	4	0.84485
MYO18B	6	0.83543	0.83532	1	16112	0	0.81827	0.016203	0.059925	0.794556	1516	4	0.81827
B3GNT6	6	0.77213	0.77779	1	14462	1	0.87443	0.016227	0.060001	0.794556	1517	4	0.87443
SMIM15	6	0.76376	0.77105	1	14266	1	0.7851	0.016233	0.060017	0.794556	1518	4	0.7851
ATP12A	6	0.47948	0.61556	1	10134	1	0.79249	0.016236	0.060022	0.794556	1519	4	0.79249
NOL4	6	0.92825	0.92847	1	19004	0	0.36189	0.016239	0.060031	0.794556	1520	3	0.36189
DOCK10	6	0.82407	0.82395	1	15801	1	0.64364	0.016264	0.06011	0.794687	1521	3	0.64364
EMC2	6	0.85626	0.85619	1	16735	0	0.64167	0.016288	0.060197	0.794829	1522	3	0.64167
KCTD13	6	0.61647	0.67818	1	11661	1	0.8475	0.016321	0.060304	0.794829	1523	4	0.8475
hsa-mir-2116	4	0.44216	0.49227	1	9454	1	0.87196	0.016322	0.053102	0.78726	1524	3	0.87196	Active
COLQ	6	0.81788	0.81789	1	15628	1	0.32122	0.016338	0.06037	0.795212	1525	3	0.32122
PTPRZ1	6	0.8485	0.84841	1	16494	0	0.43938	0.016395	0.060566	0.796907	1526	3	0.43938
ZSWIM3	6	0.91677	0.917	1	18612	0	0.77017	0.016454	0.060761	0.798094	1527	4	0.77017
MROH6	6	0.99286	0.99288	1	21311	0	0.98669	0.016469	0.060813	0.798094	1528	5	0.98669
XCR1	6	0.93959	0.9398	1	19381	0	0.71862	0.016482	0.060857	0.798094	1530	5	0.71862
RNF125	6	0.52186	0.63332	1	10513	1	-0.011553	0.016486	0.060868	0.798094	1531	2	-0.011553
AMPD2	6	0.9407	0.94092	1	19415	0	0.65299	0.0165	0.060913	0.798094	1532	3	0.65299
STX2	6	0.97242	0.97245	1	20516	0	0.80659	0.01653	0.061014	0.798094	1533	4	0.80659
SH3RF3	6	0.20641	0.36042	1	5756	2	-0.038041	0.016536	0.06103	0.798094	1534	2	-0.038041
FGF1	6	0.97064	0.97066	1	20452	0	0.58891	0.016564	0.061105	0.798591	1536	4	0.58891
LOC100507003	6	0.32627	0.47209	1	7379	2	-0.35604	0.016585	0.061179	0.799018	1537	2	-0.35604
SCYL3	6	0.98926	0.98929	1	21164	0	0.81328	0.016596	0.061211	0.799018	1538	5	0.81328
NEGR1	6	0.81807	0.81807	1	15632	1	0.8947	0.016631	0.061324	0.799452	1539	5	0.8947
ATP5L2	6	0.55061	0.64607	1	10793	1	0.84228	0.016654	0.061398	0.799452	1540	5	0.84228
SUN1	6	0.75671	0.76561	1	14129	1	0.75584	0.016666	0.061432	0.799452	1541	4	0.75584
LOC643355	6	0.070125	0.16467	1	3442	3	-0.69957	0.016685	0.061488	0.799452	1542	1	-0.69957
RARRES2	6	0.25384	0.4041	1	6337	2	0.74759	0.016688	0.0615	0.799452	1543	3	0.74759
PIK3CA	6	0.80253	0.80347	1	15211	1	0.49044	0.016709	0.061563	0.799452	1545	3	0.49044
RASSF9	6	0.18158	0.33766	1	5460	1	0.53449	0.016722	0.061607	0.799452	1546	3	0.53449
LOC643037	6	0.99481	0.99484	1	21393	0	0.82438	0.016733	0.061643	0.799452	1547	5	0.82438
FCN2	6	0.40107	0.54373	1	8672	2	0.36852	0.016734	0.061649	0.799452	1548	3	0.36852
NUPR1	6	0.71517	0.7362	1	13283	1	0.76315	0.016777	0.061801	0.800726	1549	4	0.76315
FOXA3	6	0.55254	0.64695	1	10815	1	0.044316	0.016784	0.061824	0.800726	1550	2	0.044316
TRAPPC5	6	0.40378	0.54639	1	8724	2	0.52473	0.016833	0.061978	0.801794	1552	3	0.52473
EXOC3L1	6	0.69856	0.72531	1	12970	1	0.76021	0.016863	0.062068	0.801806	1553	4	0.76021
OR10W1	6	0.85154	0.8514	1	16593	0	0.69153	0.01687	0.062089	0.801806	1554	3	0.69153
IL5RA	6	0.85703	0.85695	1	16755	0	0.51344	0.016883	0.062131	0.801865	1555	4	0.51344
hsa-mir-6834	4	0.98154	0.98152	1	20846	0	0.94144	0.016915	0.054855	0.790738	1556	4	0.94144	Active
TRPM8	6	0.9246	0.92483	1	18884	0	0.81303	0.016919	0.062246	0.802582	1557	4	0.81303
XIRP2	6	0.94119	0.94142	1	19437	0	0.38871	0.016932	0.062287	0.802582	1558	3	0.38871
ZNF534	6	0.42348	0.56548	1	9097	1	0.67513	0.016935	0.062297	0.802582	1559	3	0.67513
C7	6	0.99277	0.99278	1	21304	0	0.73808	0.016965	0.062395	0.803369	1560	5	0.73808
hsa-mir-2114	4	0.983	0.983	1	20902	0	0.58872	0.016998	0.055104	0.790738	1561	4	0.58872	Active
hsa-mir-183	4	0.63883	0.64147	1	11982	1	0.60758	0.017003	0.055114	0.790738	1562	2	0.60758	Active
CLVS1	6	0.9152	0.91539	1	18558	0	0.57266	0.017007	0.062549	0.80351	1563	4	0.57266
FAM24B	6	0.40181	0.54445	1	8686	2	0.87932	0.017009	0.062553	0.80351	1564	4	0.87932
MAGEL2	6	0.77457	0.77972	1	14517	1	0.79834	0.017029	0.062617	0.80351	1565	5	0.79834
NTM	6	0.80192	0.80289	1	15197	1	0.53545	0.017031	0.062629	0.80351	1566	4	0.53545
ADAM17	6	0.7645	0.77162	1	14291	1	0.57378	0.017057	0.062711	0.804094	1567	3	0.57378
PXDNL	5	0.80254	0.80273	1	15212	0	1.1025	0.017063	0.057314	0.794058	1568	4	1.1025
KIAA1683	6	0.33469	0.48008	1	7496	1	0.26877	0.017068	0.062752	0.804146	1569	3	0.26877
RDX	6	0.94892	0.94904	1	19699	0	0.75059	0.017081	0.062794	0.804203	1570	5	0.75059
hsa-mir-1298	4	0.97272	0.97273	1	20525	0	0.87062	0.017129	0.055505	0.79207	1571	3	0.87062	Active
HMGA1	6	0.024097	0.072995	0.645972	2412	3	-0.54809	0.01713	0.06295	0.805138	1572	2	-0.54809
OR4N4	6	0.99031	0.99034	1	21202	0	0.50149	0.017139	0.062978	0.805138	1573	5	0.50149
ELAVL3	6	0.32103	0.46719	1	7298	2	0.070864	0.01718	0.0631	0.806015	1574	2	0.070864
ING2	6	0.86547	0.86545	1	17031	0	0.86635	0.017216	0.063214	0.806015	1575	4	0.86635
hsa-mir-3130-1	4	0.98277	0.98277	1	20897	0	0.64081	0.017231	0.055808	0.79207	1576	4	0.64081	Active
CDR1	6	0.60375	0.67171	1	11492	1	0.1278	0.017238	0.063284	0.806015	1577	2	0.1278
RPS6KA5	6	0.9839	0.98401	1	20939	0	0.65221	0.017251	0.06333	0.806015	1578	5	0.65221
CXorf57	6	0.89341	0.8936	1	17876	0	0.84494	0.017257	0.063345	0.806015	1579	5	0.84494
TMEM33	6	0.93283	0.93307	1	19160	0	0.73898	0.017269	0.063376	0.806015	1580	4	0.73898
WNT5A	6	0.31264	0.45927	1	7159	2	0.081212	0.017279	0.063404	0.806015	1581	2	0.081212
PSME4	6	0.94649	0.94664	1	19611	0	0.64854	0.017284	0.063418	0.806015	1582	4	0.64854
SPRN	6	0.24251	0.39352	1	6191	1	0.79155	0.017297	0.063453	0.806015	1583	4	0.79155
TEPP	6	0.99113	0.99114	1	21242	0	0.82763	0.017298	0.063455	0.806015	1584	5	0.82763
hsa-mir-135a-2	4	0.98268	0.98268	1	20893	0	0.66744	0.017316	0.056091	0.792721	1585	4	0.66744	Active
THOC6	6	0.0060792	0.023187	0.292476	1700	3	-0.83908	0.017328	0.063557	0.806037	1586	1	-0.83908
ARHGAP12	6	0.36902	0.51282	1	8088	1	0.34866	0.017331	0.063564	0.806037	1587	3	0.34866
CCDC93	6	0.93281	0.93304	1	19159	0	0.51741	0.017361	0.063665	0.806037	1588	3	0.51741
FUBP3	6	0.75506	0.76437	1	14096	1	0.93001	0.017369	0.063689	0.806037	1589	4	0.93001
UFL1	6	0.14425	0.28526	1	4803	3	-0.36928	0.017378	0.063716	0.806037	1590	1	-0.36928
TMEM39A	6	0.99393	0.99396	1	21357	0	0.84004	0.017383	0.063734	0.806037	1591	4	0.84004
DOCK9	6	0.82208	0.82195	1	15756	1	0.81156	0.017388	0.063754	0.806037	1592	4	0.81156
WNT3A	6	0.85565	0.85556	1	16717	0	0.13667	0.017408	0.06382	0.806295	1593	2	0.13667
STK38	6	0.73126	0.74708	1	13594	1	0.79521	0.017425	0.063875	0.806295	1594	4	0.79521
RNF207	6	0.44556	0.58716	1	9522	2	-0.025972	0.017427	0.063886	0.806295	1595	3	-0.025972
SERTAD3	6	0.9356	0.93579	1	19251	0	0.3008	0.017463	0.064011	0.806945	1596	3	0.3008
hsa-mir-6078	4	0.97192	0.97193	1	20495	0	0.99513	0.017467	0.056505	0.793173	1597	3	0.99513	Active
TNKS2	6	0.94551	0.94565	1	19579	0	0.65773	0.01749	0.064102	0.807146	1598	5	0.65773
CUBN	6	0.84978	0.84969	1	16529	0	0.91285	0.017491	0.064102	0.807146	1599	4	0.91285
LSP1	6	0.90396	0.90408	1	18191	0	0.64432	0.017509	0.064165	0.807235	1600	3	0.64432
TBX3	6	0.94547	0.94562	1	19578	0	0.56598	0.017515	0.064188	0.807235	1601	5	0.56598
LRP2	6	0.90294	0.90304	1	18157	0	0.21477	0.017526	0.064224	0.807235	1602	3	0.21477
PTPRH	6	0.85	0.84991	1	16537	0	0.087383	0.017576	0.064388	0.807235	1603	3	0.087383
BCMO1	6	0.41666	0.55876	1	8980	1	0.53919	0.01758	0.064408	0.807235	1604	5	0.53919
ZBTB6	6	0.96525	0.96523	1	20262	0	0.62603	0.017588	0.064434	0.807235	1605	5	0.62603
DCUN1D4	6	0.91657	0.9168	1	18606	0	0.96929	0.017593	0.064451	0.807235	1606	4	0.96929
DZIP3	6	0.93253	0.93276	1	19149	0	-0.038196	0.017625	0.064561	0.807235	1607	2	-0.038196
CTSA	6	0.97374	0.97383	1	20553	0	0.62569	0.017629	0.064573	0.807235	1608	5	0.62569
RCOR2	6	0.85152	0.85139	1	16592	0	0.861	0.017633	0.064585	0.807235	1609	4	0.861
OR2D3	6	0.46018	0.60159	1	9832	1	0.67759	0.01766	0.064664	0.807235	1610	5	0.67759
SPEN	6	0.092191	0.20147	1	3827	2	0.68453	0.01766	0.064665	0.807235	1611	3	0.68453
ARL8B	6	0.16726	0.32121	1	5247	3	-0.42174	0.017675	0.064716	0.807235	1612	1	-0.42174
OR6M1	6	0.83641	0.8363	1	16151	0	0.8128	0.017678	0.064725	0.807235	1613	4	0.8128
FGF16	6	0.95701	0.957	1	19970	0	0.50961	0.017693	0.064778	0.807235	1614	5	0.50961
DLG1	6	0.86104	0.86096	1	16891	0	0.77787	0.017704	0.064816	0.807249	1615	4	0.77787
NXPH1	6	0.93367	0.9339	1	19180	0	0.66561	0.017774	0.065025	0.808336	1617	4	0.66561
hsa-mir-1279	2	0.9822	0.9823	1	20872	0	1.0297	0.017799	0.033063	0.745304	1618	2	1.0297	Active
hsa-mir-195	4	0.75026	0.75022	1	13996	0	0.43199	0.017812	0.057478	0.794419	1619	2	0.43199	Active
OR8G5	5	0.55777	0.60734	1	10880	1	0.69011	0.017813	0.059382	0.794556	1620	4	0.69011
hsa-mir-99a	4	0.52942	0.55259	1	10590	1	0.8947	0.017821	0.057502	0.794419	1621	3	0.8947	Active
DNAJC6	6	0.78618	0.7894	1	14811	1	-0.0367	0.017823	0.065187	0.808336	1622	2	-0.0367
PRSS42	6	0.83778	0.83769	1	16191	0	0.75398	0.017856	0.065284	0.808336	1623	4	0.75398
SMYD1	6	0.24048	0.3916	1	6167	1	0.76629	0.017858	0.065293	0.808336	1624	4	0.76629
SCN2B	6	0.9912	0.99122	1	21246	0	0.85921	0.01786	0.065297	0.808336	1625	5	0.85921
CD44	6	0.78542	0.78876	1	14786	1	-0.049406	0.017873	0.065335	0.808336	1626	1	-0.049406
GPR64	6	0.98624	0.98633	1	21043	0	0.83811	0.01788	0.065361	0.808336	1627	4	0.83811
RARS	6	0.15949	0.3092	1	5076	2	0.20407	0.017892	0.065401	0.808336	1628	3	0.20407
PHF7	6	0.93749	0.93772	1	19312	0	0.67583	0.017903	0.065434	0.808336	1629	5	0.67583
IQCG	6	0.8597	0.85963	1	16839	0	0.78737	0.017912	0.065462	0.808336	1630	4	0.78737
hsa-mir-4253	4	0.98194	0.98193	1	20863	0	0.97975	0.017913	0.057751	0.794556	1631	4	0.97975	Active
hsa-mir-492	4	0.88408	0.88387	1	17597	0	0.95183	0.017933	0.057808	0.794556	1632	3	0.95183	Active
MAPK10	6	0.79509	0.79698	1	15025	1	0.58718	0.01794	0.065554	0.808544	1633	4	0.58718
ZNF384	6	0.77551	0.78048	1	14543	1	0.53531	0.017943	0.065562	0.808544	1634	5	0.53531
CACNA1D	6	0.93505	0.93526	1	19229	0	0.48868	0.017966	0.065647	0.808544	1635	5	0.48868
C21orf91	6	0.94488	0.94502	1	19558	0	0.80431	0.017982	0.065693	0.808544	1636	5	0.80431
TMOD4	6	0.28587	0.4341	1	6772	1	0.79845	0.018001	0.065753	0.808544	1637	5	0.79845
VIL1	6	0.72916	0.74559	1	13555	1	0.64903	0.018021	0.065813	0.808544	1638	4	0.64903
CCDC39	6	0.9337	0.93392	1	19182	0	0.54036	0.018022	0.065814	0.808544	1639	5	0.54036
UGT3A1	6	0.71232	0.7343	1	13229	1	0.76462	0.018069	0.06596	0.8094	1640	4	0.76462
SLC16A1	6	0.68792	0.71857	1	12781	1	-0.014119	0.018071	0.065964	0.8094	1641	2	-0.014119
RYR3	6	0.99032	0.99035	1	21203	0	0.78426	0.01808	0.065996	0.8094	1642	4	0.78426
GALP	6	0.097262	0.20983	1	3907	3	-0.32258	0.01812	0.06613	0.809723	1643	2	-0.32258
AKT1S1	6	0.049407	0.1292	0.892622	3087	2	0.56628	0.018121	0.066134	0.809723	1644	3	0.56628
ZNF625	5	0.54528	0.59987	1	10745	1	0.36567	0.018136	0.060262	0.794829	1645	2	0.36567
hsa-mir-4260	4	0.86763	0.86739	1	17100	0	1.1042	0.01814	0.058426	0.794556	1646	3	1.1042	Active
KLK3	6	0.32	0.46623	1	7277	2	0.72307	0.018141	0.066192	0.809981	1647	3	0.72307
hsa-mir-3975	4	0.98185	0.98185	1	20860	0	0.76615	0.018145	0.058443	0.794556	1648	4	0.76615	Active
SIGIRR	6	0.57207	0.6561	1	11063	1	0.025551	0.01817	0.066283	0.810172	1649	2	0.025551
AKAP4	6	0.91089	0.91102	1	18429	0	0.72617	0.018202	0.066383	0.810508	1650	4	0.72617
DENND2C	6	0.81316	0.8133	1	15499	1	0.12232	0.018219	0.066434	0.810508	1651	2	0.12232
SHCBP1	6	0.97296	0.973	1	20535	0	0.83901	0.018223	0.066448	0.810508	1652	4	0.83901
MFGE8	6	0.87336	0.87343	1	17270	0	0.47637	0.018268	0.066601	0.810508	1655	3	0.47637
CPLX2	6	0.65118	0.69696	1	12178	1	0.94131	0.018285	0.066653	0.810542	1656	4	0.94131
MYO3A	6	0.86311	0.86304	1	16957	0	0.82369	0.018296	0.066686	0.810542	1657	4	0.82369
ZNF714	5	0.33774	0.47367	1	7549	1	0.94907	0.018361	0.060867	0.798094	1658	3	0.94907
KRT76	6	0.6207	0.68041	1	11717	1	0.21443	0.018417	0.067077	0.813815	1659	2	0.21443
FEZF1	6	0.89901	0.89912	1	18033	0	0.23934	0.018446	0.067185	0.813815	1660	3	0.23934
MON2	6	0.0199	0.061765	0.576818	2287	1	0.88229	0.018457	0.067223	0.813815	1661	4	0.88229
ADI1	6	0.99378	0.99381	1	21349	0	0.55598	0.01847	0.067262	0.813815	1662	5	0.55598
UBTD2	6	0.74004	0.75336	1	13778	1	0.54844	0.018472	0.067267	0.813815	1663	3	0.54844
TTC26	6	0.64033	0.69092	1	12004	1	0.73915	0.018479	0.067293	0.813815	1664	4	0.73915
UMOD	6	0.36324	0.50729	1	7975	2	0.4424	0.018516	0.067407	0.814734	1665	4	0.4424
hsa-mir-376b	4	0.98148	0.98146	1	20843	0	0.56675	0.018521	0.059576	0.794556	1666	4	0.56675	Active
ACAD10	6	0.98456	0.98469	1	20970	0	0.89328	0.01858	0.067602	0.81563	1667	4	0.89328
ACTR3	6	0.77458	0.77973	1	14518	1	0.63573	0.018585	0.067619	0.81563	1668	3	0.63573
PKN2	6	0.89031	0.89042	1	17780	0	0.6453	0.018589	0.067631	0.81563	1669	5	0.6453
OR5M10	6	0.29419	0.44186	1	6885	2	0.5627	0.018615	0.067718	0.815689	1670	3	0.5627
ZNF638	6	0.54169	0.64208	1	10711	1	0.62888	0.018619	0.06773	0.815689	1671	5	0.62888
C3orf80	6	0.27291	0.42202	1	6596	2	0.92552	0.018623	0.067749	0.815689	1672	4	0.92552
NTHL1	6	0.99041	0.99044	1	21205	0	0.56077	0.018645	0.067816	0.81605	1673	5	0.56077
hsa-mir-548f-5	4	0.9813	0.98129	1	20836	0	0.61315	0.018696	0.060064	0.794556	1674	4	0.61315	Active
CLEC4A	6	0.77089	0.7768	1	14436	1	0.65691	0.018713	0.068032	0.816973	1675	5	0.65691
CHFR	6	0.98173	0.98187	1	20852	0	0.7811	0.018718	0.068052	0.816973	1676	4	0.7811
NOD2	6	0.8778	0.87781	1	17396	0	0.8144	0.018741	0.068122	0.816973	1677	5	0.8144
AREG	6	0.9723	0.97233	1	20512	0	0.83798	0.018803	0.068321	0.816973	1678	4	0.83798
ACSL3	6	0.71947	0.73905	1	13352	1	0.38468	0.018806	0.068327	0.816973	1679	3	0.38468
AUH	6	0.86391	0.86387	1	16981	0	0.79898	0.018819	0.068375	0.816973	1680	4	0.79898
CXorf22	6	0.76959	0.77574	1	14408	1	0.53246	0.01882	0.068384	0.816973	1681	5	0.53246
PRSS8	6	0.67638	0.71164	1	12605	1	0.7085	0.018838	0.068443	0.816973	1682	4	0.7085
FA2H	6	0.51214	0.62907	1	10411	1	0.72486	0.018851	0.068481	0.816973	1683	5	0.72486
GUCY2D	6	0.7861	0.78933	1	14807	1	0.44665	0.018862	0.068514	0.816973	1684	3	0.44665
SNX30	6	0.70749	0.7311	1	13152	1	0.54215	0.01887	0.06854	0.816973	1685	4	0.54215
RHBDD3	6	0.55791	0.64943	1	10882	1	0.78148	0.018883	0.06858	0.816973	1686	5	0.78148
NOL10	6	0.32936	0.47504	1	7419	2	0.57171	0.018886	0.068592	0.816973	1687	3	0.57171
HP	6	0.81045	0.81073	1	15415	1	0.57849	0.018887	0.068593	0.816973	1688	5	0.57849
FANCI	6	0.021602	0.066313	0.606884	2332	4	-0.67472	0.018911	0.068672	0.816973	1689	1	-0.67472
PRSS21	6	0.34493	0.48988	1	7667	1	0.63735	0.018915	0.068683	0.816973	1690	5	0.63735
WSCD2	6	0.97949	0.97962	1	20776	0	0.7655	0.018941	0.068771	0.817009	1691	4	0.7655
SLC22A12	6	0.80382	0.80465	1	15243	1	0.62663	0.018958	0.068835	0.817009	1692	3	0.62663
SMCO2	6	0.92455	0.92478	1	18882	0	0.65698	0.018967	0.068867	0.817009	1693	5	0.65698
YIPF4	6	0.97917	0.9793	1	20765	0	0.5721	0.019009	0.068986	0.817009	1694	5	0.5721
ITGA2	6	0.8967	0.89684	1	17966	0	0.3628	0.01901	0.068991	0.817009	1695	3	0.3628
SAMD12	6	0.5339	0.63863	1	10621	1	0.55189	0.019064	0.069173	0.817009	1696	4	0.55189
ASB10	6	0.85698	0.85691	1	16752	0	0.74338	0.019065	0.069176	0.817009	1697	5	0.74338
CCL3	6	0.55385	0.64756	1	10832	1	0.60634	0.019076	0.069215	0.817009	1698	5	0.60634
MTERFD3	6	0.97463	0.97473	1	20579	0	0.78816	0.01908	0.069227	0.817009	1699	4	0.78816
FOXN4	6	0.93024	0.93046	1	19079	0	0.84916	0.019104	0.069308	0.817009	1700	4	0.84916
SDHAF2	6	0.044385	0.12053	0.862926	2981	3	-0.7593	0.019109	0.06933	0.817009	1701	1	-0.7593
PSORS1C2	6	0.37996	0.52334	1	8294	2	0.46466	0.019158	0.069464	0.817009	1702	3	0.46466
C7orf25	6	0.35092	0.49561	1	7770	2	-0.095365	0.019158	0.069465	0.817009	1703	2	-0.095365
WNT9A	6	0.70676	0.73063	1	13133	1	0.63193	0.019196	0.069592	0.817009	1704	5	0.63193
GAK	6	0.0017165	0.007384	0.133244	1194	4	-1.4705	0.019208	0.069632	0.817009	1705	2	-1.4705
ANKRD13C	6	0.5938	0.66673	1	11362	1	0.85194	0.019234	0.069725	0.817009	1706	4	0.85194
MAP6D1	6	0.91476	0.91495	1	18549	0	0.13281	0.019257	0.069809	0.817009	1707	1	0.13281
CLEC6A	6	0.97492	0.97505	1	20586	0	0.77766	0.019259	0.069813	0.817009	1708	4	0.77766
RUNDC3A	6	0.97577	0.9759	1	20622	0	0.42927	0.019299	0.069942	0.817009	1709	4	0.42927
ZNF812	6	0.056213	0.14111	0.941058	3205	3	-0.59283	0.019307	0.069967	0.817009	1710	2	-0.59283
hsa-mir-4684	4	0.98069	0.9807	1	20817	0	0.63499	0.019312	0.061858	0.800726	1711	4	0.63499	Active
C14orf182	6	0.78588	0.78914	1	14801	1	0.85558	0.019318	0.070001	0.817009	1712	4	0.85558
PRR14L	6	0.97968	0.97982	1	20783	0	0.71357	0.019347	0.070101	0.817009	1713	5	0.71357
SEC24D	6	0.63228	0.68652	1	11879	1	0.58675	0.019356	0.07013	0.817009	1714	4	0.58675
SSR4	6	0.98611	0.98621	1	21035	0	0.88752	0.019362	0.070148	0.817009	1715	5	0.88752
ZNF75D	6	0.98585	0.98596	1	21025	0	0.52439	0.019404	0.070277	0.817009	1716	5	0.52439
HP1BP3	6	0.93123	0.93145	1	19107	0	0.28646	0.019406	0.07028	0.817009	1717	2	0.28646
NAT8	6	0.687	0.71803	1	12771	1	0.79053	0.019439	0.070394	0.817009	1718	4	0.79053
CDH23	6	0.86306	0.863	1	16956	0	0.38986	0.019455	0.070436	0.817009	1719	2	0.38986
TMEM110	6	0.47226	0.61267	1	10084	1	0.72126	0.019468	0.070478	0.817009	1720	4	0.72126
RPL3L	6	0.92153	0.92175	1	18769	0	0.71333	0.019476	0.070509	0.817009	1721	4	0.71333
IQCF2	6	0.95165	0.95177	1	19793	0	0.88181	0.019501	0.07059	0.817009	1722	5	0.88181
WDR7	6	0.45092	0.5925	1	9621	1	0.55365	0.019504	0.070595	0.817009	1723	5	0.55365
FAM72B	2	0.80049	0.80017	1	15151	0	1.3837	0.019552	0.036184	0.750947	1724	1	1.3837
hsa-mir-4687	4	0.8486	0.84835	1	16496	0	0.83629	0.019568	0.062576	0.80351	1725	3	0.83629	Active
USP15	6	0.96286	0.96284	1	20174	0	0.75018	0.019581	0.070856	0.817009	1726	5	0.75018
HIGD1B	6	0.77241	0.77802	1	14469	1	0.67219	0.019613	0.070955	0.817009	1727	3	0.67219
ADAM21	6	0.99698	0.99703	1	21487	0	0.50919	0.019619	0.070973	0.817009	1728	5	0.50919
NR3C1	6	0.38573	0.52891	1	8395	1	0.60572	0.019628	0.071005	0.817009	1729	5	0.60572
ICOSLG	6	0.98596	0.98607	1	21028	0	0.73378	0.019634	0.071025	0.817009	1730	5	0.73378
STON1	6	0.93615	0.93635	1	19268	0	0.6608	0.019638	0.071037	0.817009	1731	3	0.6608
SOGA1	6	0.035782	0.1031	0.785055	2803	3	-0.060166	0.01965	0.071076	0.817009	1732	3	-0.060166
ZNF277	6	0.44644	0.58802	1	9543	2	0.27811	0.019653	0.071081	0.817009	1733	2	0.27811
hsa-mir-3606	4	0.95425	0.95411	1	19872	0	0.73111	0.019693	0.062931	0.805138	1734	3	0.73111	Active
CXorf64	6	0.7937	0.79578	1	14987	1	0.8127	0.019695	0.071234	0.817009	1735	5	0.8127
SERPINA4	6	0.96286	0.96283	1	20173	0	0.74847	0.019699	0.071251	0.817009	1736	4	0.74847
EFNB3	6	0.80795	0.80843	1	15354	1	0.36707	0.019702	0.07126	0.817009	1737	3	0.36707
GIGYF2	6	0.96866	0.96865	1	20384	0	0.54764	0.01971	0.071288	0.817009	1738	5	0.54764
HOXC8	6	0.2278	0.37994	1	5999	2	0.68637	0.019715	0.071301	0.817009	1739	4	0.68637
IRAK4	6	0.9957	0.99575	1	21433	0	0.74088	0.019744	0.071396	0.817009	1740	5	0.74088
ATP11B	6	0.37496	0.51851	1	8207	1	0.65438	0.019757	0.071438	0.817009	1741	5	0.65438
MEOX2	6	0.88312	0.88319	1	17569	0	0.58241	0.019801	0.071586	0.817009	1742	4	0.58241
METRN	6	0.41415	0.55632	1	8926	1	0.56894	0.019834	0.071698	0.817009	1743	3	0.56894
BGN	6	0.40613	0.54862	1	8772	1	0.8832	0.019846	0.071741	0.817009	1744	5	0.8832
MAN1A1	6	0.68868	0.71906	1	12789	1	0.39589	0.01985	0.07175	0.817009	1745	4	0.39589
DUSP5	6	0.92343	0.92363	1	18834	0	0.52131	0.019873	0.071824	0.817009	1746	5	0.52131
CCDC97	6	0.994	0.99403	1	21360	0	0.78273	0.01988	0.071844	0.817009	1747	4	0.78273
PCDHGA1	6	0.59667	0.66817	1	11396	1	0.525	0.019898	0.071897	0.817009	1748	5	0.525
TMEM56	6	0.54245	0.64243	1	10719	1	0.42893	0.0199	0.071903	0.817009	1749	3	0.42893
OR2B3	6	0.85225	0.85213	1	16611	0	0.63267	0.0199	0.071905	0.817009	1750	5	0.63267
SLC28A1	6	0.90814	0.90828	1	18333	0	0.31368	0.019949	0.072076	0.817009	1751	3	0.31368
FAM228A	6	0.97672	0.97684	1	20659	0	0.79538	0.019952	0.072085	0.817009	1752	4	0.79538
SLC12A1	6	0.92379	0.92399	1	18851	0	0.89564	0.01996	0.07211	0.817009	1753	4	0.89564
ODF3B	6	0.22778	0.37992	1	5998	2	-0.21324	0.019979	0.072164	0.817009	1754	2	-0.21324
ARL6	6	0.91418	0.91437	1	18533	0	0.75509	0.019984	0.07218	0.817009	1755	4	0.75509
RGR	6	0.43628	0.57796	1	9332	1	0.61466	0.019998	0.072235	0.817009	1756	4	0.61466
QSER1	6	0.86242	0.86232	1	16935	0	0.76603	0.02001	0.072279	0.817009	1757	4	0.76603
SRRM4	6	0.63117	0.6859	1	11861	1	0.66965	0.020017	0.0723	0.817009	1758	5	0.66965
TRIM56	6	0.97019	0.97019	1	20437	0	0.63437	0.020029	0.072342	0.817009	1759	5	0.63437
SRSF4	6	0.44041	0.58211	1	9417	2	-0.19373	0.020048	0.072399	0.817009	1760	2	-0.19373
MTPN	6	0.64114	0.69134	1	12015	1	0.76209	0.020056	0.072421	0.817009	1761	4	0.76209
CHRAC1	6	0.99585	0.9959	1	21438	0	0.66909	0.020074	0.072472	0.817009	1762	5	0.66909
SMIM21	6	0.95443	0.9545	1	19876	0	0.57658	0.020078	0.072487	0.817009	1763	5	0.57658
DEPTOR	6	0.24386	0.39479	1	6210	2	0.45591	0.020097	0.072542	0.817009	1764	4	0.45591
GTDC1	6	0.96999	0.96998	1	20433	0	0.85641	0.020102	0.07256	0.817009	1765	4	0.85641
PHACTR2	6	0.96019	0.96016	1	20071	0	0.36193	0.020102	0.072561	0.817009	1766	3	0.36193
TGFBRAP1	6	0.64687	0.69454	1	12115	1	0.70417	0.020103	0.072563	0.817009	1767	5	0.70417
ZNF691	6	0.94823	0.94836	1	19669	0	0.79897	0.020111	0.072585	0.817009	1768	4	0.79897
C7orf66	6	0.77678	0.78153	1	14582	1	0.87668	0.020146	0.072683	0.817009	1769	4	0.87668
GDPD5	6	0.73591	0.75038	1	13684	1	0.5198	0.020147	0.072685	0.817009	1770	4	0.5198
ZNF184	6	0.92588	0.92613	1	18928	0	0.77326	0.020158	0.072719	0.817009	1771	4	0.77326
HCAR2	6	0.98885	0.98892	1	21151	0	0.56398	0.020169	0.072753	0.817009	1772	5	0.56398
hsa-mir-4749	4	0.53922	0.55984	1	10677	1	0.45019	0.020221	0.064353	0.807235	1773	2	0.45019	Active
BAI3	6	0.99062	0.99064	1	21217	0	0.47817	0.020221	0.072904	0.817009	1774	5	0.47817
MANEAL	6	0.86187	0.86179	1	16914	0	0.62417	0.020227	0.072924	0.817009	1775	4	0.62417
ACSF3	6	0.8868	0.88685	1	17686	0	0.52137	0.020245	0.072982	0.817009	1776	4	0.52137
C15orf48	6	0.96176	0.96177	1	20128	0	0.74728	0.020255	0.073012	0.817009	1777	5	0.74728
CYP7B1	6	0.31896	0.46524	1	7254	2	0.80805	0.020282	0.073089	0.817009	1778	4	0.80805
FAM114A1	6	0.8976	0.89773	1	17993	0	0.71005	0.02029	0.073118	0.817009	1779	4	0.71005
METTL25	6	0.73665	0.75093	1	13698	1	0.69005	0.020292	0.073125	0.817009	1780	5	0.69005
UBAP1	6	0.54022	0.64141	1	10691	1	-0.0079113	0.020295	0.073137	0.817009	1781	2	-0.0079113
SCYL1	6	0.82393	0.8238	1	15800	1	0.5525	0.020301	0.073156	0.817009	1782	5	0.5525
ACBD7	6	0.33226	0.47781	1	7459	1	0.26444	0.020302	0.073158	0.817009	1783	3	0.26444
GPATCH2	6	0.80664	0.80724	1	15319	1	0.33945	0.020344	0.073302	0.817009	1785	3	0.33945
TRPC7	6	0.6258	0.68308	1	11786	1	0.69579	0.020345	0.073308	0.817009	1786	4	0.69579
hsa-mir-10a	4	0.58922	0.59891	1	11303	1	0.67659	0.020352	0.0646	0.807235	1787	2	0.67659	Active
GDPD3	6	0.76963	0.77577	1	14409	1	0.65711	0.020358	0.073346	0.817009	1788	3	0.65711
ZC3H10	6	0.93942	0.93965	1	19376	0	0.65236	0.020363	0.073361	0.817009	1789	5	0.65236
CDYL	6	0.85852	0.85845	1	16804	0	0.64108	0.020371	0.073389	0.817009	1790	3	0.64108
HSPB8	6	0.98901	0.98907	1	21156	0	0.58088	0.020443	0.073617	0.817009	1793	5	0.58088
TSHZ2	6	0.98859	0.98865	1	21137	0	0.31508	0.020443	0.073617	0.817009	1794	2	0.31508
PICALM	6	0.92834	0.92857	1	19007	0	0.59574	0.020447	0.073633	0.817009	1795	5	0.59574
CYS1	6	0.95853	0.95851	1	20025	0	0.42894	0.020451	0.073641	0.817009	1796	3	0.42894
GPR125	6	0.77301	0.77849	1	14485	1	0.79117	0.020454	0.073651	0.817009	1797	4	0.79117
HIST1H1E	6	0.97879	0.97893	1	20746	0	0.85666	0.020476	0.073721	0.817009	1798	4	0.85666
DNAJC27	6	0.2675	0.41701	1	6534	1	0.64118	0.020492	0.073775	0.817009	1799	4	0.64118
RPRD2	6	0.24374	0.39468	1	6209	2	-0.18707	0.02051	0.073834	0.817009	1800	2	-0.18707
GALNT2	6	0.47691	0.61455	1	10119	1	0.59276	0.020528	0.073882	0.817009	1801	5	0.59276
NR4A3	6	0.93716	0.93737	1	19300	0	0.14467	0.020542	0.073928	0.817009	1802	2	0.14467
TRIM65	6	0.026783	0.079999	0.676253	2513	4	-0.70421	0.020568	0.074015	0.817009	1803	2	-0.70421
KCNAB2	6	0.57085	0.6555	1	11048	1	0.88015	0.020576	0.074038	0.817009	1804	4	0.88015
SLA2	6	0.83728	0.83719	1	16176	0	0.82058	0.020586	0.074065	0.817009	1805	5	0.82058
YPEL2	6	0.88024	0.88029	1	17489	0	0.71066	0.020589	0.074072	0.817009	1806	4	0.71066
hsa-mir-5739	4	0.78454	0.78444	1	14767	0	0.76975	0.02059	0.065108	0.808336	1807	3	0.76975	Active
AWAT2	6	0.52947	0.63668	1	10592	1	0.58866	0.020591	0.074076	0.817009	1808	4	0.58866
SPACA5	6	0.95892	0.9589	1	20039	0	0.52695	0.020594	0.07409	0.817009	1809	5	0.52695
LRSAM1	6	0.9201	0.92032	1	18723	0	0.67845	0.02061	0.074135	0.817009	1810	3	0.67845
HPR	6	0.64099	0.69126	1	12012	1	0.74215	0.020613	0.074148	0.817009	1811	5	0.74215
hsa-mir-3146	4	0.86708	0.86683	1	17082	0	1.1438	0.020627	0.065182	0.808336	1812	3	1.1438	Active
MSH6	6	0.59652	0.6681	1	11394	1	0.81829	0.020642	0.074237	0.817009	1813	4	0.81829
DMRTB1	6	0.88865	0.88871	1	17741	0	0.86015	0.020651	0.074267	0.817009	1814	4	0.86015
MALT1	6	0.98854	0.98861	1	21135	0	0.48432	0.020664	0.074312	0.817009	1815	5	0.48432
FAM122B	6	0.75171	0.76191	1	14024	1	0.64005	0.020673	0.074336	0.817009	1816	5	0.64005
ZNF684	6	0.82057	0.82051	1	15708	1	0.37156	0.02069	0.074389	0.817009	1817	3	0.37156
CENPB	6	0.9173	0.91753	1	18630	0	0.62647	0.020696	0.074407	0.817009	1818	5	0.62647
ACE2	6	0.9936	0.99365	1	21342	0	0.62543	0.020733	0.074522	0.817009	1820	5	0.62543
KRTAP21-3	4	0.73458	0.73451	1	13659	0	0.88833	0.020736	0.065393	0.808336	1821	3	0.88833
LOC100130357	6	0.37901	0.52244	1	8277	1	0.72474	0.020752	0.074577	0.817009	1822	3	0.72474
GARS	6	0.023905	0.072467	0.642616	2407	3	-0.45134	0.020752	0.07458	0.817009	1823	2	-0.45134
ZBTB7A	6	0.026842	0.080147	0.677239	2516	3	-0.19019	0.020761	0.074607	0.817009	1824	3	-0.19019
HRH4	6	0.24997	0.40041	1	6291	1	0.84433	0.020813	0.074759	0.817009	1825	4	0.84433
SNX4	6	0.93908	0.93933	1	19363	0	0.48986	0.02082	0.074777	0.817009	1826	4	0.48986
ASCL4	6	0.91296	0.91316	1	18492	0	0.77723	0.020822	0.074783	0.817009	1827	4	0.77723
DUSP22	6	0.066142	0.15791	0.995529	3378	3	-0.32474	0.020838	0.074831	0.817009	1828	2	-0.32474
KPNA3	6	0.46138	0.60274	1	9862	1	0.23977	0.020862	0.074906	0.817009	1829	3	0.23977
ADAM29	6	0.98573	0.98585	1	21016	0	0.84571	0.020869	0.074926	0.817009	1830	5	0.84571
MYH6	6	0.98346	0.98358	1	20920	0	0.53342	0.02087	0.074929	0.817009	1831	3	0.53342
BRINP2	6	0.97844	0.97857	1	20723	0	0.75262	0.020877	0.07495	0.817009	1832	4	0.75262
hsa-mir-4326	4	0.089877	0.16966	1	3794	1	1.085	0.020877	0.065682	0.808544	1833	3	1.085	Active
TRIM17	6	0.89213	0.89227	1	17846	0	0.41398	0.020887	0.074976	0.817009	1834	3	0.41398
TULP1	6	0.45757	0.599	1	9767	2	0.57857	0.020887	0.074978	0.817009	1835	3	0.57857
hsa-mir-6748	4	0.82952	0.8294	1	15947	0	0.89964	0.02092	0.065763	0.808544	1836	2	0.89964	Active
BATF2	6	0.78152	0.78546	1	14699	1	0.46443	0.020937	0.075149	0.817009	1837	3	0.46443
KIAA1009	6	0.39723	0.54003	1	8606	2	0.78674	0.020938	0.075149	0.817009	1838	4	0.78674
ALDH18A1	6	0.94709	0.94721	1	19626	0	0.55888	0.020938	0.075149	0.817009	1839	5	0.55888
CMTM2	6	0.81388	0.814	1	15518	1	0.41331	0.020954	0.0752	0.817009	1840	3	0.41331
PCDH20	6	0.76477	0.77184	1	14300	1	0.77068	0.020988	0.07531	0.817009	1841	5	0.77068
SNX32	6	0.83006	0.82992	1	15966	0	0.72375	0.021011	0.075386	0.817009	1842	3	0.72375
SERTM1	6	0.76391	0.77117	1	14272	1	0.96681	0.021024	0.075439	0.817009	1843	4	0.96681
EYA1	6	0.77276	0.7783	1	14479	1	0.50688	0.021024	0.075439	0.817009	1844	5	0.50688
EIF2AK1	6	0.74627	0.75791	1	13902	1	0.63815	0.021084	0.075638	0.817009	1845	3	0.63815
FNBP1L	6	0.84665	0.84653	1	16445	0	0.70736	0.021088	0.075646	0.817009	1846	5	0.70736
PRRG1	6	0.02217	0.067827	0.616059	2352	1	0.86106	0.021098	0.075682	0.817009	1847	4	0.86106
TMEM202	6	0.81592	0.81601	1	15571	1	0.4272	0.021134	0.075798	0.817009	1848	4	0.4272
UIMC1	6	0.2797	0.42837	1	6696	1	0.62971	0.021182	0.075955	0.817009	1849	5	0.62971
THSD7A	6	0.61012	0.67491	1	11576	1	0.35783	0.021191	0.075985	0.817009	1850	3	0.35783
PHF16	6	0.86709	0.86708	1	17083	0	0.81678	0.021194	0.075995	0.817009	1851	4	0.81678
CCDC81	6	0.87569	0.87575	1	17328	0	0.5703	0.021198	0.076008	0.817009	1852	3	0.5703
CD164L2	6	0.86516	0.86514	1	17022	0	0.56351	0.021212	0.076057	0.817009	1853	5	0.56351
TMEM117	6	0.10259	0.21857	1	4001	2	-0.043388	0.021216	0.076064	0.817009	1854	2	-0.043388
APIP	6	0.91206	0.91226	1	18463	0	0.37065	0.021233	0.076118	0.817009	1855	3	0.37065
SLC7A3	6	0.93994	0.94018	1	19396	0	0.92063	0.021257	0.076196	0.817009	1856	4	0.92063
CPLX3	6	0.59782	0.66873	1	11413	1	0.5584	0.021262	0.076212	0.817009	1857	5	0.5584
AGL	6	0.91444	0.91464	1	18544	0	0.58484	0.021267	0.076228	0.817009	1858	5	0.58484
KRTAP9-4	6	0.43335	0.57504	1	9279	1	0.81263	0.021278	0.076268	0.817009	1859	4	0.81263
C20orf96	6	0.22725	0.37943	1	5992	2	0.070269	0.021282	0.07628	0.817009	1860	2	0.070269
CLEC16A	6	0.87994	0.87998	1	17475	0	0.52407	0.021301	0.076344	0.817009	1861	4	0.52407
ZNF500	6	0.69954	0.72596	1	12990	1	0.88954	0.021309	0.076365	0.817009	1862	4	0.88954
NFIB	6	0.47241	0.61273	1	10086	1	0.52544	0.021311	0.076371	0.817009	1863	3	0.52544
hsa-mir-8082	4	0.97635	0.97644	1	20644	0	0.86778	0.021311	0.066562	0.810508	1864	3	0.86778	Active
PLEKHG7	6	0.9872	0.98725	1	21081	0	0.55189	0.021323	0.076405	0.817009	1865	5	0.55189
KEL	6	0.9846	0.98472	1	20973	0	0.93027	0.021324	0.076407	0.817009	1866	4	0.93027
GNRH1	6	0.30083	0.44812	1	6977	2	0.4909	0.021331	0.076433	0.817009	1867	3	0.4909
KIAA0825	6	0.83652	0.83642	1	16156	0	0.80883	0.021345	0.07648	0.817009	1868	4	0.80883
ONECUT1	6	0.33216	0.47771	1	7456	2	0.71914	0.021351	0.076499	0.817009	1869	3	0.71914
CLDN12	6	0.40397	0.54656	1	8727	2	0.66995	0.021357	0.076519	0.817009	1870	4	0.66995
ULBP1	6	0.99609	0.99613	1	21445	0	0.74648	0.021439	0.076778	0.817009	1871	5	0.74648
ZNF561	6	0.577	0.65845	1	11125	1	0.54548	0.021479	0.076908	0.817009	1872	3	0.54548
CEP290	6	0.75766	0.76635	1	14152	1	0.87851	0.021483	0.076923	0.817009	1873	4	0.87851
FGD3	6	0.37696	0.52041	1	8238	2	0.33433	0.021488	0.076936	0.817009	1874	3	0.33433
TBX6	6	0.78596	0.7892	1	14804	1	0.72833	0.021493	0.076947	0.817009	1875	4	0.72833
HOMEZ	6	0.066776	0.15898	0.999159	3389	1	0.82125	0.021535	0.077076	0.817009	1876	5	0.82125
KCTD3	4	0.12389	0.21283	1	4405	2	0.18342	0.021556	0.06706	0.813815	1877	2	0.18342
PIK3CG	6	0.95569	0.95571	1	19925	0	0.74025	0.021561	0.077163	0.817009	1878	4	0.74025
CYB5RL	6	0.67149	0.70874	1	12516	1	0.54227	0.021578	0.077213	0.817009	1880	5	0.54227
EVC2	6	0.98831	0.98838	1	21129	0	0.46499	0.02158	0.077221	0.817009	1881	5	0.46499
MPPED2	6	0.98603	0.98613	1	21032	0	0.65567	0.021601	0.077287	0.817009	1882	3	0.65567
EFHC2	6	0.69167	0.7209	1	12846	1	0.77427	0.021602	0.077288	0.817009	1883	4	0.77427
CCDC27	6	0.29572	0.44329	1	6907	1	0.73286	0.021604	0.077296	0.817009	1884	5	0.73286
PLCB2	6	0.99052	0.99054	1	21212	0	0.69035	0.021618	0.077347	0.817009	1885	5	0.69035
BMPR2	6	0.7206	0.73982	1	13372	1	0.87634	0.021653	0.077468	0.817009	1886	4	0.87634
EN1	6	0.98418	0.9843	1	20952	0	0.57208	0.021671	0.077528	0.817009	1887	5	0.57208
SAA2	6	0.83267	0.83251	1	16047	0	0.63017	0.021672	0.077532	0.817009	1888	4	0.63017
RCVRN	6	0.31151	0.45821	1	7146	2	0.20581	0.021676	0.077549	0.817009	1889	3	0.20581
DGCR2	6	0.461	0.60237	1	9853	2	0.85438	0.021813	0.077974	0.817009	1890	4	0.85438
VPS37D	6	0.9844	0.98452	1	20962	0	0.4086	0.021824	0.078009	0.817009	1891	3	0.4086
PILRA	6	0.97712	0.97724	1	20678	0	0.78074	0.021825	0.07801	0.817009	1892	5	0.78074
ISG15	6	0.92522	0.92546	1	18907	0	0.26307	0.02183	0.078029	0.817009	1893	2	0.26307
NYX	6	0.81834	0.81833	1	15638	1	0.9186	0.02183	0.078031	0.817009	1894	4	0.9186
ZNF667	6	0.85449	0.85438	1	16686	0	0.50909	0.021832	0.078039	0.817009	1895	5	0.50909
BMP7	6	0.88328	0.88335	1	17574	0	0.65817	0.021841	0.078064	0.817009	1896	5	0.65817
LIMD1	6	0.99216	0.99218	1	21277	0	0.68916	0.021849	0.078084	0.817009	1897	4	0.68916
NCOA1	6	0.64216	0.6919	1	12036	1	0.15044	0.021874	0.07816	0.817009	1898	2	0.15044
RNASE13	6	0.98178	0.98193	1	20855	0	0.77387	0.021916	0.078288	0.817009	1899	4	0.77387
CDK14	6	0.16677	0.32047	1	5235	1	0.40544	0.021916	0.078288	0.817009	1900	3	0.40544
ARMCX1	6	0.35258	0.49714	1	7794	2	0.21898	0.021923	0.07831	0.817009	1901	2	0.21898
GLTPD2	6	0.87309	0.87315	1	17264	0	0.12296	0.021925	0.078313	0.817009	1902	3	0.12296
ALOX15B	6	0.83597	0.83588	1	16130	0	0.73951	0.021929	0.07833	0.817009	1903	4	0.73951
MRPS5	6	0.42221	0.56424	1	9074	1	0.83043	0.021971	0.078472	0.817009	1904	4	0.83043
RHOF	6	0.51355	0.62969	1	10424	1	0.86821	0.021974	0.07848	0.817009	1905	4	0.86821
GFAP	6	0.94574	0.94587	1	19582	0	0.57012	0.021993	0.078537	0.817009	1906	3	0.57012
GIN1	6	0.96983	0.96983	1	20429	0	0.80818	0.022003	0.078569	0.817009	1907	5	0.80818
MYLIP	6	0.99026	0.99029	1	21197	0	0.63837	0.022013	0.0786	0.817009	1908	5	0.63837
GLRA3	6	0.87475	0.87482	1	17300	0	0.44619	0.022019	0.078622	0.817009	1909	3	0.44619
TMEM67	6	0.54266	0.64252	1	10722	1	0.11911	0.022022	0.078631	0.817009	1910	3	0.11911
SSX7	5	0.62265	0.64885	1	11745	1	0.97653	0.022023	0.070665	0.817009	1911	3	0.97653
P2RY1	6	0.23447	0.38604	1	6086	2	0.1815	0.022028	0.07865	0.817009	1912	3	0.1815
OR13C8	6	0.94361	0.94377	1	19517	0	0.51264	0.022071	0.07878	0.817009	1913	3	0.51264
ANGPTL3	6	0.91365	0.91386	1	18513	0	0.75752	0.022103	0.078887	0.817009	1914	5	0.75752
ZNF577	6	0.47259	0.6128	1	10087	1	0.58572	0.02211	0.078908	0.817009	1915	5	0.58572
UBXN4	6	0.8	0.80123	1	15137	1	0.88149	0.022111	0.07891	0.817009	1916	4	0.88149
TCERG1L	6	0.44771	0.58925	1	9566	1	0.63868	0.022122	0.078938	0.817009	1917	4	0.63868
JAM2	6	0.86936	0.86939	1	17152	0	0.66084	0.022143	0.079004	0.817009	1919	4	0.66084
HTR2C	6	0.89192	0.89205	1	17839	0	0.54224	0.022186	0.079121	0.817009	1920	5	0.54224
CCR1	6	0.2154	0.36855	1	5866	2	0.27963	0.022188	0.079127	0.817009	1921	3	0.27963
UBN2	6	0.72143	0.74037	1	13388	1	0.57631	0.022192	0.079142	0.817009	1922	4	0.57631
DSG3	6	0.78668	0.78982	1	14825	1	0.62924	0.022212	0.079202	0.817009	1923	5	0.62924
RANBP3	6	0.027364	0.081502	0.683311	2534	4	-0.61386	0.022219	0.079227	0.817009	1924	2	-0.61386
EIF2AK2	6	0.53486	0.63904	1	10635	1	0.61088	0.022268	0.079383	0.817009	1925	3	0.61088
MRPL35	6	0.040603	0.11388	0.830136	2930	2	0.36102	0.022278	0.079419	0.817009	1926	3	0.36102
C17orf107	6	0.99401	0.99404	1	21362	0	0.77548	0.022302	0.079495	0.817009	1927	5	0.77548
PSG2	6	0.71992	0.73936	1	13359	1	0.58895	0.022318	0.079549	0.817009	1928	5	0.58895
hsa-mir-4525	4	0.33904	0.42963	1	7565	1	0.62167	0.02233	0.068667	0.816973	1929	2	0.62167	Active
MTRNR2L2	6	0.98828	0.98835	1	21127	0	0.77801	0.022333	0.079594	0.817009	1930	4	0.77801
BEGAIN	6	0.47664	0.61444	1	10116	1	0.46433	0.022335	0.079602	0.817009	1931	5	0.46433
RRP12	6	0.62267	0.68146	1	11746	1	0.73912	0.022336	0.079604	0.817009	1932	4	0.73912
hsa-mir-941-2	2	0.97766	0.97784	1	20698	0	0.99868	0.022336	0.0413	0.759861	1933	2	0.99868	Active
TTC9	6	0.57036	0.65526	1	11042	1	0.89339	0.022361	0.079676	0.817009	1934	4	0.89339
OR8B4	6	0.98725	0.9873	1	21084	0	0.61682	0.022364	0.079687	0.817009	1935	5	0.61682
ZSWIM2	6	0.99552	0.99558	1	21423	0	0.63906	0.022379	0.079727	0.817009	1936	5	0.63906
SPAG7	6	0.95104	0.95116	1	19776	0	0.44716	0.022391	0.079773	0.817009	1937	5	0.44716
KRTAP4-3	6	0.85771	0.85763	1	16779	0	0.71479	0.022408	0.079823	0.817009	1938	3	0.71479
AP4B1	6	0.37989	0.52327	1	8293	1	0.36186	0.022416	0.079848	0.817009	1939	3	0.36186
OR8B12	6	0.9878	0.98785	1	21104	0	0.58523	0.02247	0.080011	0.817009	1940	5	0.58523
ACAN	6	0.63261	0.68669	1	11885	1	0.8815	0.022482	0.080051	0.817009	1941	4	0.8815
FERMT3	6	0.12377	0.25263	1	4400	2	0.69332	0.022488	0.080068	0.817009	1942	4	0.69332
LOX	6	0.97125	0.97128	1	20474	0	0.63117	0.02249	0.080072	0.817009	1943	5	0.63117
EMD	6	0.97059	0.97061	1	20449	0	0.63183	0.022514	0.080156	0.817009	1944	5	0.63183
RARG	6	0.64782	0.69507	1	12131	1	-0.14928	0.022515	0.080157	0.817009	1945	2	-0.14928
AMER3	6	0.90844	0.90859	1	18345	0	0.3434	0.02253	0.08021	0.817009	1946	2	0.3434
MED28	6	0.00018589	0.0010223	0.036688	598	4	-1.353	0.022564	0.080313	0.817009	1948	1	-1.353
HSPB3	6	0.41797	0.56006	1	8997	2	0.70774	0.022573	0.080334	0.817009	1949	4	0.70774
KBTBD4	6	0.91592	0.91613	1	18580	0	0.76663	0.022576	0.080346	0.817009	1950	5	0.76663
GPR110	6	0.8355	0.8354	1	16114	0	0.80145	0.022582	0.080375	0.817009	1951	4	0.80145
BAG6	6	0.98895	0.98902	1	21155	0	0.90208	0.022583	0.080378	0.817009	1953	5	0.90208
DDR2	6	0.99448	0.99452	1	21380	0	0.50863	0.022606	0.080453	0.817009	1954	5	0.50863
ARHGEF9	6	0.30545	0.45245	1	7051	1	0.7546	0.022626	0.08052	0.817009	1955	4	0.7546
FIGF	6	0.99698	0.99703	1	21488	0	0.87669	0.02263	0.080534	0.817009	1956	5	0.87669
MAGEB6	6	0.73901	0.75262	1	13757	1	0.52865	0.022672	0.080659	0.817009	1957	5	0.52865
hsa-mir-1471	4	0.62508	0.62935	1	11773	1	0.80127	0.022729	0.069483	0.817009	1958	3	0.80127	Active
CACNA1G	6	0.79987	0.80111	1	15134	1	0.28157	0.022761	0.080962	0.817009	1960	2	0.28157
SLC25A40	6	0.1183	0.24392	1	4290	2	0.79071	0.022774	0.081002	0.817009	1961	4	0.79071
CCL15	6	0.77945	0.78374	1	14643	1	0.71274	0.022783	0.081029	0.817009	1962	4	0.71274
B3GNT5	6	0.54548	0.6438	1	10750	1	0.68181	0.022789	0.081044	0.817009	1963	5	0.68181
OR8K5	6	0.80031	0.80149	1	15146	1	0.52567	0.022799	0.08107	0.817009	1964	5	0.52567
DUSP6	6	0.95171	0.95184	1	19797	0	0.50235	0.02281	0.081107	0.817009	1965	3	0.50235
SLC22A8	6	0.8692	0.86922	1	17145	0	0.49487	0.022832	0.081175	0.817009	1966	5	0.49487
FAM71B	6	0.9705	0.97051	1	20448	0	0.66275	0.02286	0.081275	0.817009	1967	4	0.66275
hsa-mir-4665	4	0.82594	0.8258	1	15859	0	0.79678	0.022894	0.069816	0.817009	1969	2	0.79678	Active
LRRIQ1	6	0.99638	0.99643	1	21463	0	0.66658	0.022914	0.081458	0.817009	1970	5	0.66658
FN3KRP	6	0.48779	0.61895	1	10196	1	0.79154	0.022925	0.081495	0.817009	1971	4	0.79154
GFOD2	6	0.30755	0.45441	1	7089	2	0.43032	0.022949	0.081573	0.817009	1972	3	0.43032
KLHL9	6	0.84924	0.84915	1	16511	0	0.48047	0.022958	0.081599	0.817009	1973	4	0.48047
OSR2	6	0.12779	0.25901	1	4485	3	-0.26379	0.022984	0.081679	0.817009	1974	2	-0.26379
BTAF1	6	0.014828	0.047906	0.485956	2105	4	-0.89489	0.023007	0.081754	0.817009	1975	1	-0.89489
TTC39B	6	0.8813	0.88136	1	17516	0	0.45908	0.023011	0.081769	0.817009	1976	3	0.45908
hsa-mir-4667	4	0.13699	0.22939	1	4661	1	0.45398	0.023019	0.070062	0.817009	1977	2	0.45398	Active
TMEM165	6	0.035308	0.10192	0.779211	2789	3	0.19894	0.023025	0.081808	0.817009	1978	3	0.19894
ARHGAP23	6	0.84053	0.84041	1	16267	0	0.12224	0.023028	0.081815	0.817009	1979	2	0.12224
AFF2	6	0.89031	0.89042	1	17779	0	0.77669	0.023039	0.081848	0.817009	1980	4	0.77669
SLC25A22	6	0.62005	0.68006	1	11706	1	0.623	0.023057	0.081903	0.817009	1981	4	0.623
CYBB	6	0.99585	0.9959	1	21439	0	0.54853	0.023058	0.081908	0.817009	1982	5	0.54853
AP1M2	6	0.74482	0.75685	1	13877	1	0.79326	0.023062	0.08192	0.817009	1983	4	0.79326
CCBE1	6	0.68182	0.71487	1	12689	1	0.82905	0.023087	0.081989	0.817009	1984	4	0.82905
C1QL1	6	0.097454	0.21012	1	3910	1	0.75753	0.02309	0.081998	0.817009	1985	4	0.75753
GATA2	6	0.94503	0.94518	1	19566	0	0.82536	0.023096	0.08202	0.817009	1986	4	0.82536
ZNF692	6	0.60552	0.67261	1	11516	1	0.4421	0.023099	0.082032	0.817009	1987	5	0.4421
SGMS2	6	0.84733	0.84721	1	16466	0	0.73867	0.023103	0.082044	0.817009	1988	4	0.73867
LRRC14	6	0.44007	0.58175	1	9412	1	0.3091	0.023106	0.082051	0.817009	1989	3	0.3091
PCDHB5	6	0.19564	0.35051	1	5633	2	0.98135	0.023112	0.082076	0.817009	1990	4	0.98135
hsa-mir-181a-1	4	0.67574	0.67604	1	12587	1	-0.22613	0.02312	0.070275	0.817009	1991	1	-0.22613	Active
ZEB1	6	0.92696	0.92721	1	18968	0	0.49874	0.02314	0.082164	0.817009	1992	3	0.49874
PMFBP1	6	0.44476	0.58639	1	9505	1	0.61983	0.023143	0.082176	0.817009	1993	4	0.61983
TMEM160	6	0.39716	0.53995	1	8604	1	0.75638	0.023144	0.08218	0.817009	1994	4	0.75638
UBE2N	6	0.24307	0.39402	1	6201	2	0.082868	0.023151	0.082201	0.817009	1995	3	0.082868
KLHL21	6	0.97816	0.97829	1	20712	0	0.47847	0.023182	0.082298	0.817009	1996	5	0.47847
TRDN	6	0.80063	0.80178	1	15157	1	-0.25391	0.023204	0.082358	0.817009	1997	2	-0.25391
SHROOM4	6	0.99086	0.99086	1	21227	0	0.82908	0.023211	0.082382	0.817009	1998	4	0.82908
PLP1	6	0.9743	0.97438	1	20570	0	0.73027	0.023214	0.08239	0.817009	1999	4	0.73027
TRIM39-RPP21	2	0.97676	0.97692	1	20663	0	1.1148	0.023241	0.042889	0.759983	2000	2	1.1148
EDA	6	0.90704	0.90718	1	18302	0	0.53101	0.023245	0.082485	0.817009	2001	5	0.53101
TMEM41A	6	0.75525	0.76452	1	14100	1	0.49573	0.023281	0.082591	0.817009	2002	5	0.49573
PDIA3	6	0.92204	0.92223	1	18783	0	0.28374	0.023303	0.082659	0.817009	2003	3	0.28374
ZFYVE9	6	0.8604	0.86032	1	16866	0	0.53627	0.023309	0.082674	0.817009	2004	5	0.53627
RAB5A	6	0.59288	0.66628	1	11348	1	0.41048	0.023314	0.082692	0.817009	2005	5	0.41048
PDE6C	6	0.9957	0.99575	1	21434	0	0.57129	0.023316	0.082701	0.817009	2006	5	0.57129
ANK3	6	0.75616	0.76521	1	14121	1	0.73105	0.023333	0.082757	0.817009	2007	4	0.73105
XRCC6BP1	6	0.29927	0.44665	1	6956	1	-0.017269	0.023352	0.08283	0.817009	2008	1	-0.017269
GNA13	6	0.38458	0.52779	1	8378	2	0.84593	0.023364	0.082866	0.817009	2009	4	0.84593
EBLN1	6	0.98887	0.98894	1	21152	0	0.7064	0.023367	0.082874	0.817009	2010	5	0.7064
HNRNPAB	6	0.078938	0.17951	1	3598	3	-0.20159	0.023372	0.082897	0.817009	2011	2	-0.20159
SLC17A5	6	0.76755	0.77408	1	14359	1	0.15779	0.023401	0.082992	0.817009	2012	2	0.15779
PYDC1	6	0.57123	0.65568	1	11053	1	0.77602	0.023432	0.08309	0.817009	2013	4	0.77602
ASPH	6	0.9894	0.98946	1	21171	0	0.48726	0.023435	0.083102	0.817009	2014	5	0.48726
PRR3	6	0.99308	0.99312	1	21320	0	0.58715	0.023438	0.083115	0.817009	2015	5	0.58715
MTR	6	0.92125	0.92147	1	18761	0	0.76282	0.023449	0.083149	0.817009	2016	4	0.76282
SLC12A3	6	0.91233	0.91254	1	18475	0	0.05778	0.023451	0.083154	0.817009	2017	2	0.05778
CERS3	6	0.98034	0.98048	1	20804	0	0.74152	0.023458	0.083175	0.817009	2018	5	0.74152
ATP8B4	6	0.98819	0.98825	1	21122	0	0.72705	0.023458	0.083176	0.817009	2019	5	0.72705
C7orf33	6	0.94272	0.94292	1	19485	0	0.71084	0.023479	0.083244	0.817302	2020	5	0.71084
HMX1	6	0.60626	0.67299	1	11526	1	0.13852	0.023549	0.083454	0.817821	2021	1	0.13852
TAF2	6	0.15927	0.30885	1	5073	3	-0.044137	0.023549	0.083454	0.817821	2022	3	-0.044137
PALM2	6	0.81021	0.81051	1	15412	1	0.80403	0.02358	0.083554	0.817821	2023	4	0.80403
PRRG3	6	0.96766	0.96765	1	20344	0	0.38391	0.023598	0.083614	0.817821	2024	3	0.38391
FAM83D	6	0.90741	0.90754	1	18311	0	0.80814	0.023602	0.083629	0.817821	2025	4	0.80814
BPIFB3	6	0.9835	0.98362	1	20922	0	0.49434	0.023619	0.083679	0.817821	2026	5	0.49434
WRAP73	6	0.70424	0.72899	1	13081	1	0.38083	0.023648	0.083755	0.817821	2027	3	0.38083
LGI1	6	0.87679	0.87685	1	17361	0	0.89005	0.023648	0.083758	0.817821	2028	4	0.89005
ALDH1A2	6	0.70477	0.72934	1	13091	1	0.5148	0.023652	0.08377	0.817821	2029	5	0.5148
TM4SF18	6	0.87921	0.87926	1	17447	0	0.59164	0.023655	0.083776	0.817821	2030	5	0.59164
RERG	6	0.80871	0.80912	1	15371	1	0.74689	0.023674	0.083829	0.817821	2031	4	0.74689
NPHP4	6	0.93451	0.93475	1	19208	0	0.38487	0.023697	0.083909	0.817821	2032	3	0.38487
TMEM18	6	0.90834	0.90848	1	18342	0	0.51755	0.023714	0.083963	0.817821	2033	5	0.51755
PIGG	6	0.91536	0.91555	1	18564	0	0.50885	0.023721	0.083979	0.817821	2034	5	0.50885
PPIP5K2	6	0.076665	0.17575	1	3553	3	0.099967	0.023727	0.083997	0.817821	2035	3	0.099967
PATZ1	6	0.72991	0.74613	1	13566	1	0.59145	0.02376	0.084098	0.817821	2036	3	0.59145
MLNR	6	0.77279	0.77832	1	14481	1	0.71833	0.023769	0.08412	0.817821	2037	4	0.71833
HELB	6	0.95802	0.95801	1	20006	0	0.7851	0.023778	0.084145	0.817821	2038	5	0.7851
WDR78	6	0.9026	0.90271	1	18142	0	0.4409	0.023795	0.084197	0.817821	2039	3	0.4409
PDZD11	6	0.35899	0.5032	1	7890	1	0.077579	0.023845	0.084357	0.817821	2040	2	0.077579
[truncated: 18,709 more rows]
