# Supplementary material for: Ribosome subunit attrition and activation of the p53–MDM4 axis dominate the response of MLL-rearranged cancer cells to WDR5 WIN site inhibition
Source: eLife. 2024 Apr 29;12:RP90683. doi: 10.7554/eLife.90683 (PMC11057873; doi:10.7554/eLife.90683)
Supplement: Figure 5—source data 2. [file elife-90683-fig5-data2.xlsx]

## Sheet: C16_vs_DMSO
Feature	Feature_gene_name	log2FoldChange	padj
ENSG00000163584.13	RPL22L1	-1.48742	1.54888e-82
ENSG00000109475.12	RPL34	-0.811352	5.77461e-46
ENSG00000147604.9	RPL7	-0.822945	6.53921e-46
ENSG00000115484.10	CCT4	-0.807951	6.7262e-46
ENSG00000137812.15	CASC5	-0.75562	6.53876e-42
ENSG00000172667.6	ZMAT3	1.08762	1.39535e-41
ENSG00000172716.12	SLFN11	-1.30119	5.36445e-37
ENSG00000089009.11	RPL6	-0.879405	5.71354e-35
ENSG00000134419.11	RPS15A	-0.676799	6.98094e-35
ENSG00000145425.5	RPS3A	-0.639461	4.31491e-34
ENSG00000213923.6	CSNK1E	-1.04526	7.57313e-32
ENSG00000146223.10	RPL7L1	-0.6547	8.78133e-32
ENSG00000135624.11	CCT7	-1.01824	4.06099e-29
ENSG00000124767.6	GLO1	-0.59763	2.65688e-28
ENSG00000159388.5	BTG2	0.778286	1.01062e-26
ENSG00000171863.8	RPS7	-0.658134	2.27519e-26
ENSG00000174748.14	RPL15	-0.5444	7.25772e-26
ENSG00000130723.13	PRRC2B	-0.685036	8.90198e-26
ENSG00000122406.8	RPL5	-0.741146	3.71811e-24
ENSG00000138778.7	CENPE	-0.686654	1.45912e-22
ENSG00000163682.11	RPL9	-0.625945	1.67679e-22
ENSG00000164938.9	TP53INP1	0.88569	3.03236e-22
ENSG00000120802.9	TMPO	-0.553055	6.02016e-22
ENSG00000182899.10	RPL35A	-0.746128	7.42125e-22
ENSG00000148303.12	RPL7A	-0.763797	9.62096e-22
ENSG00000171320.10	ESCO2	-0.609119	3.56153e-21
ENSG00000118193.7	KIF14	-0.702205	3.98051e-21
ENSG00000140525.13	FANCI	-0.50205	6.63937e-21
ENSG00000124614.9	RPS10	-1.3238	9.22466e-21
ENSG00000066279.12	ASPM	-0.656908	9.22631e-21
ENSG00000149554.8	CHEK1	-0.527079	1.20486e-20
ENSG00000143228.8	NUF2	-0.628221	5.4806e-20
ENSG00000058804.10	NDC1	-0.501024	1.84363e-19
ENSG00000101003.8	GINS1	-0.678754	2.89876e-19
ENSG00000125835.13	SNRPB	-0.804921	4.11008e-19
ENSG00000075391.12	RASAL2	0.404441	8.14667e-19
ENSG00000024526.12	DEPDC1	-0.707392	1.24283e-18
ENSG00000168078.5	PBK	-0.639495	4.88508e-18
ENSG00000184661.9	CDCA2	-0.637262	3.6268e-17
ENSG00000138160.4	KIF11	-0.564414	5.57474e-17
ENSG00000142731.6	PLK4	-0.575837	5.57474e-17
ENSG00000139734.13	DIAPH3	-0.684708	1.08547e-16
ENSG00000092621.7	PHGDH	-1.37748	1.31035e-16
ENSG00000135069.9	PSAT1	-0.695571	5.27413e-16
ENSG00000097046.8	CDC7	-0.552032	7.51191e-16
ENSG00000146192.10	FGD2	0.756286	1.56688e-15
ENSG00000163808.12	KIF15	-0.60921	1.64251e-15
ENSG00000198034.6	RPS4X	-0.597713	2.01103e-15
ENSG00000134644.11	PUM1	-0.38863	2.35024e-15
ENSG00000131747.10	TOP2A	-0.600658	2.91852e-15
ENSG00000170312.11	CDK1	-0.547656	2.91852e-15
ENSG00000117724.8	CENPF	-0.625944	3.19593e-15
ENSG00000117650.8	NEK2	-0.706886	4.78553e-15
ENSG00000182578.9	CSF1R	0.58599	5.11054e-15
ENSG00000132274.11	TRIM22	0.608272	1.01038e-14
ENSG00000139618.10	BRCA2	-0.487202	1.2511e-14
ENSG00000131080.10	EDA2R	0.832279	1.59874e-14
ENSG00000114391.8	RPL24	-0.579415	1.7118e-14
ENSG00000080546.9	SESN1	0.658835	2.08094e-14
ENSG00000112742.5	TTK	-0.604177	2.39545e-14
ENSG00000148019.8	CEP78	-0.498263	2.51981e-14
ENSG00000136824.14	SMC2	-0.525418	3.28765e-14
ENSG00000112367.6	FIG4	0.477922	3.74649e-14
ENSG00000156802.8	ATAD2	-0.473471	3.74649e-14
ENSG00000072571.15	HMMR	-0.580478	4.5134e-14
ENSG00000171848.9	RRM2	-0.628809	5.80552e-14
ENSG00000138182.10	KIF20B	-0.534905	8.30815e-14
ENSG00000169607.8	CKAP2L	-0.59019	8.64659e-14
ENSG00000079819.12	EPB41L2	-0.622502	9.12106e-14
ENSG00000124795.10	DEK	-0.441018	1.39711e-13
ENSG00000111670.10	GNPTAB	0.388309	1.52265e-13
ENSG00000163507.9	KIAA1524	-0.474667	1.67741e-13
ENSG00000189091.8	SF3B3	-0.596758	1.99482e-13
ENSG00000124942.9	AHNAK	0.472669	2.50264e-13
ENSG00000164754.8	RAD21	-0.38759	2.70559e-13
ENSG00000109674.3	NEIL3	-0.646746	2.92536e-13
ENSG00000136982.5	DSCC1	-0.576319	3.00178e-13
ENSG00000137807.9	KIF23	-0.576181	3.59274e-13
ENSG00000126787.8	DLGAP5	-0.673491	4.04274e-13
ENSG00000070081.11	NUCB2	-0.340335	4.43969e-13
ENSG00000035499.8	DEPDC1B	-0.618151	4.93647e-13
ENSG00000080986.8	NDC80	-0.549443	1.00539e-12
ENSG00000051341.9	POLQ	-0.611428	1.03108e-12
ENSG00000110628.9	SLC22A18	0.862722	1.12222e-12
ENSG00000129173.8	E2F8	-0.617052	1.61928e-12
ENSG00000125089.12	SH3TC1	0.934261	1.76935e-12
ENSG00000142864.10	SERBP1	-0.500796	1.81205e-12
ENSG00000164587.7	RPS14	-0.670554	2.57523e-12
ENSG00000075151.15	EIF4G3	-0.479788	2.60411e-12
ENSG00000144554.6	FANCD2	-0.495354	2.60411e-12
ENSG00000147874.6	HAUS6	-0.366509	2.63531e-12
ENSG00000040275.12	SPDL1	-0.558886	2.91963e-12
ENSG00000189403.10	HMGB1	-0.309996	2.93446e-12
ENSG00000129566.8	TEP1	0.372861	3.33847e-12
ENSG00000153044.5	CENPH	-0.654523	3.92321e-12
ENSG00000011426.6	ANLN	-0.45709	4.93891e-12
ENSG00000171241.4	SHCBP1	-0.513804	5.20079e-12
ENSG00000165304.3	MELK	-0.59676	5.79046e-12
ENSG00000107796.8	ACTA2	1.16555	6.11303e-12
ENSG00000160200.13	CBS	-1.08586	7.59996e-12
ENSG00000093000.14	NUP50	-0.307538	8.40089e-12
ENSG00000129810.10	SGOL1	-0.671468	1.16393e-11
ENSG00000114346.9	ECT2	-0.447824	1.20871e-11
ENSG00000175832.8	ETV4	-0.914242	1.24847e-11
ENSG00000077684.11	PHF17	-0.5484	1.55942e-11
ENSG00000162244.6	RPL29	-0.820617	1.60624e-11
ENSG00000145386.5	CCNA2	-0.701571	1.94831e-11
ENSG00000164109.9	MAD2L1	-0.503831	2.15194e-11
ENSG00000125885.9	MCM8	-0.5263	2.35391e-11
ENSG00000265681.2	RPL17	-0.841062	2.49887e-11
ENSG00000121621.6	KIF18A	-0.498063	2.57184e-11
ENSG00000135679.17	MDM2	0.7564	2.95512e-11
ENSG00000137563.7	GGH	-0.514215	3.00239e-11
ENSG00000109805.5	NCAPG	-0.538025	3.29915e-11
ENSG00000055163.14	CYFIP2	0.873552	3.39553e-11
ENSG00000088812.13	ATRN	0.319399	3.81218e-11
ENSG00000088854.11	C20orf194	0.309926	3.81218e-11
ENSG00000133119.8	RFC3	-0.545048	5.09384e-11
ENSG00000229117.4	RPL41	-0.645384	5.47642e-11
ENSG00000176208.4	ATAD5	-0.483119	5.7297e-11
ENSG00000146918.15	NCAPG2	-0.520722	6.36733e-11
ENSG00000167325.10	RRM1	-0.501378	7.47978e-11
ENSG00000101347.7	SAMHD1	0.476488	7.9866e-11
ENSG00000100889.7	PCK2	-0.462261	8.31558e-11
ENSG00000137841.7	PLCB2	0.493574	1.08556e-10
ENSG00000115268.5	RPS15	-0.808949	1.53579e-10
ENSG00000186638.11	KIF24	-0.460683	1.58925e-10
ENSG00000213983.7	AP1G2	0.435166	1.58925e-10
ENSG00000115163.10	CENPA	-0.707741	1.62101e-10
ENSG00000166803.6	KIAA0101	-0.650734	1.65717e-10
ENSG00000137804.8	NUSAP1	-0.605864	1.66835e-10
ENSG00000060982.10	BCAT1	-0.569302	1.69207e-10
ENSG00000101868.6	POLA1	-0.442372	1.72393e-10
ENSG00000165490.8	C11orf82	-0.595468	1.88934e-10
ENSG00000113810.11	SMC4	-0.357963	2.19054e-10
ENSG00000161800.8	RACGAP1	-0.568709	2.34584e-10
ENSG00000064687.8	ABCA7	0.574942	2.39424e-10
ENSG00000174371.12	EXO1	-0.488797	2.48969e-10
ENSG00000000460.12	C1orf112	-0.561789	2.68627e-10
ENSG00000130775.11	THEMIS2	0.541144	2.82313e-10
ENSG00000121211.3	MND1	-0.813746	3.03627e-10
ENSG00000006756.11	ARSD	0.431617	3.42558e-10
ENSG00000125124.7	BBS2	0.392552	3.48782e-10
ENSG00000143476.13	DTL	-0.426435	4.07995e-10
ENSG00000112312.5	GMNN	-0.494984	4.87341e-10
ENSG00000094804.5	CDC6	-0.585701	5.14299e-10
ENSG00000149273.10	RPS3	-0.544022	5.14299e-10
ENSG00000100526.15	CDKN3	-0.608432	5.98006e-10
ENSG00000162607.8	USP1	-0.357285	5.98006e-10
ENSG00000169679.10	BUB1	-0.55764	6.31152e-10
ENSG00000088325.11	TPX2	-0.636362	6.86645e-10
ENSG00000132359.9	RAP1GAP2	0.500329	6.86645e-10
ENSG00000166483.6	WEE1	-0.428779	7.06767e-10
ENSG00000117632.16	STMN1	-0.444241	7.79358e-10
ENSG00000123933.10	MXD4	0.49574	9.82444e-10
ENSG00000215784.4	FAM72D	-0.867225	1.01616e-09
ENSG00000152253.4	SPC25	-0.666564	1.02627e-09
ENSG00000092853.9	CLSPN	-0.535019	1.10222e-09
ENSG00000151725.7	MLF1IP	-0.441448	1.1165e-09
ENSG00000197299.6	BLM	-0.404157	1.17821e-09
ENSG00000102054.13	RBBP7	-0.308091	1.19581e-09
ENSG00000104626.10	ERI1	-0.388253	1.20604e-09
ENSG00000063177.8	RPL18	-0.616871	1.28238e-09
ENSG00000071082.6	RPL31	-0.650693	1.2877e-09
ENSG00000138376.6	BARD1	-0.371795	1.68777e-09
ENSG00000112029.5	FBXO5	-0.438723	1.70642e-09
ENSG00000110324.5	IL10RA	0.60813	1.82149e-09
ENSG00000124575.5	HIST1H1D	-0.795732	2.0181e-09
ENSG00000166432.10	ZMAT1	0.887317	2.02603e-09
ENSG00000198826.6	ARHGAP11A	-0.376132	2.03936e-09
ENSG00000197756.5	RPL37A	-0.749809	2.50832e-09
ENSG00000009790.10	TRAF3IP3	0.428165	2.93866e-09
ENSG00000184939.11	ZFP90	0.455794	2.93866e-09
ENSG00000151474.15	FRMD4A	0.631599	3.72056e-09
ENSG00000160013.4	PTGIR	0.736021	3.77409e-09
ENSG00000198901.9	PRC1	-0.550749	4.02959e-09
ENSG00000123360.7	PDE1B	0.605294	4.28691e-09
ENSG00000166881.5	TMEM194A	-0.455649	4.28691e-09
ENSG00000163918.6	RFC4	-0.409975	5.72963e-09
ENSG00000165480.11	SKA3	-0.609611	6.70234e-09
ENSG00000131171.8	SH3BGRL	0.40312	7.50496e-09
ENSG00000102384.9	CENPI	-0.494062	8.00753e-09
ENSG00000159873.5	CCDC117	-0.321437	8.02627e-09
ENSG00000228716.2	DHFR	-0.42946	8.61355e-09
ENSG00000198554.7	WDHD1	-0.416702	9.20035e-09
ENSG00000070950.5	RAD18	-0.476452	9.43764e-09
ENSG00000120694.15	HSPH1	-0.40319	9.43764e-09
ENSG00000153029.10	MR1	0.43583	9.43764e-09
ENSG00000132386.6	SERPINF1	0.588866	9.70912e-09
ENSG00000124762.9	CDKN1A	0.856438	1.09024e-08
ENSG00000138180.11	CEP55	-0.499088	1.09024e-08
ENSG00000159259.7	CHAF1B	-0.553144	1.09024e-08
ENSG00000198563.9	DDX39B	-0.478078	1.10609e-08
ENSG00000188987.2	HIST1H4D	-0.836021	1.17132e-08
ENSG00000156970.8	BUB1B	-0.616864	1.27351e-08
ENSG00000119711.8	ALDH6A1	0.427683	1.33429e-08
ENSG00000131469.8	RPL27	-0.918453	1.33429e-08
ENSG00000108953.12	YWHAE	-0.311959	1.46724e-08
ENSG00000130255.8	RPL36	-1.05289	1.50509e-08
ENSG00000156509.9	FBXO43	-0.662284	1.50693e-08
ENSG00000125944.14	HNRNPR	-0.380066	1.59387e-08
ENSG00000136010.9	ALDH1L2	-0.797707	1.6112e-08
ENSG00000154839.5	SKA1	-0.631538	1.62587e-08
ENSG00000134057.10	CCNB1	-0.639215	1.66574e-08
ENSG00000145936.4	KCNMB1	1.48164	1.77994e-08
ENSG00000173848.14	NET1	-0.474969	1.79696e-08
ENSG00000121152.5	NCAPH	-0.557173	1.82558e-08
ENSG00000173530.5	TNFRSF10D	0.459826	1.82558e-08
ENSG00000196839.8	ADA	0.689102	1.82558e-08
ENSG00000196584.2	XRCC2	-0.486021	2.21285e-08
ENSG00000138326.14	RPS24	-0.649828	2.22223e-08
ENSG00000145882.6	PCYOX1L	0.448802	2.22223e-08
ENSG00000109323.4	MANBA	0.363844	2.2642e-08
ENSG00000110077.10	MS4A6A	0.396433	2.27966e-08
ENSG00000140534.9	TICRR	-0.638415	2.30479e-08
ENSG00000163535.13	SGOL2	-0.453588	2.42692e-08
ENSG00000101447.9	FAM83D	-0.655485	2.50675e-08
ENSG00000178202.8	KDELC2	-0.462011	2.62327e-08
ENSG00000187147.13	RNF220	-0.537061	2.92648e-08
ENSG00000123473.11	STIL	-0.394904	3.19476e-08
ENSG00000089685.10	BIRC5	-0.59062	3.22534e-08
ENSG00000142856.12	ITGB3BP	-0.456537	3.44059e-08
ENSG00000029993.10	HMGB3	-0.553218	3.98769e-08
ENSG00000182179.6	UBA7	0.337772	3.98769e-08
ENSG00000163947.7	ARHGEF3	0.402764	4.08479e-08
ENSG00000167658.11	EEF2	-0.553257	4.35747e-08
ENSG00000135476.7	ESPL1	-0.703965	4.41672e-08
ENSG00000161929.10	SCIMP	0.843037	4.5024e-08
ENSG00000127663.10	KDM4B	0.343586	5.07815e-08
ENSG00000163781.8	TOPBP1	-0.371237	5.18321e-08
ENSG00000196743.4	GM2A	0.361493	5.19064e-08
ENSG00000172809.8	RPL38	-0.76833	6.46595e-08
ENSG00000198918.7	RPL39	-0.402371	7.06036e-08
ENSG00000136942.10	RPL35	-0.716454	7.16207e-08
ENSG00000205784.2	ARRDC5	1.81197	7.16207e-08
ENSG00000139597.12	N4BP2L1	0.499001	7.42012e-08
ENSG00000145375.7	SPATA5	-0.353406	7.85571e-08
ENSG00000050438.12	SLC4A8	0.908022	7.96626e-08
ENSG00000141337.8	ARSG	0.588965	8.29232e-08
ENSG00000076003.4	MCM6	-0.549394	8.37256e-08
ENSG00000116062.10	MSH6	-0.340689	8.37256e-08
ENSG00000154359.8	LONRF1	-0.416903	8.37256e-08
ENSG00000162511.7	LAPTM5	0.464265	9.06059e-08
ENSG00000205208.4	C4orf46	-0.514109	1.02895e-07
ENSG00000174442.7	ZWILCH	-0.516968	1.24756e-07
ENSG00000075218.14	GTSE1	-0.702302	1.26942e-07
ENSG00000170581.9	STAT2	0.39233	1.26942e-07
ENSG00000144713.8	RPL32	-0.62012	1.32409e-07
ENSG00000185753.8	CXorf38	0.378934	1.32409e-07
ENSG00000006634.3	DBF4	-0.39108	1.33776e-07
ENSG00000148290.5	SURF1	0.50395	1.35085e-07
ENSG00000143226.9	FCGR2A	0.554001	1.35222e-07
ENSG00000182481.4	KPNA2	-0.498367	1.41287e-07
ENSG00000121957.8	GPSM2	-0.398227	1.42886e-07
ENSG00000160593.13	AMICA1	1.05629	1.45318e-07
ENSG00000148773.8	MKI67	-0.715512	1.47729e-07
ENSG00000164032.7	H2AFZ	-0.415424	1.57962e-07
ENSG00000136492.4	BRIP1	-0.437178	1.66789e-07
ENSG00000196081.5	ZNF724P	-0.434098	1.8876e-07
ENSG00000129824.11	RPS4Y1	-0.474291	1.93268e-07
ENSG00000125691.8	RPL23	-0.510113	1.97823e-07
ENSG00000135677.6	GNS	0.315239	1.97942e-07
ENSG00000213462.4	ERV3-1	0.558175	2.07056e-07
ENSG00000100055.16	CYTH4	0.390743	2.26076e-07
ENSG00000182628.8	SKA2	-0.375152	2.44775e-07
ENSG00000254415.3	SIGLEC14	0.698768	2.54606e-07
ENSG00000166123.9	GPT2	-0.31895	2.56621e-07
ENSG00000111445.9	RFC5	-0.465195	2.60737e-07
ENSG00000112984.7	KIF20A	-0.696851	2.64316e-07
ENSG00000065328.12	MCM10	-0.544596	2.73696e-07
ENSG00000165244.6	ZNF367	-0.491485	3.06939e-07
ENSG00000127415.8	IDUA	0.473056	3.32689e-07
ENSG00000119969.10	HELLS	-0.436177	3.33699e-07
ENSG00000152926.10	ZNF117	0.624107	3.46074e-07
ENSG00000068489.8	PRR11	-0.507374	3.63122e-07
ENSG00000175643.7	RMI2	-0.422865	4.22871e-07
ENSG00000157456.3	CCNB2	-0.521539	4.32245e-07
ENSG00000100298.11	APOBEC3H	1.1975	4.41511e-07
ENSG00000198150.2	AC135178.1	1.39832	4.41511e-07
ENSG00000091651.4	ORC6	-0.469779	4.70119e-07
ENSG00000196975.10	ANXA4	0.349127	4.73527e-07
ENSG00000142945.8	KIF2C	-0.553212	4.74699e-07
ENSG00000103522.11	IL21R	0.672716	4.83277e-07
ENSG00000007237.14	GAS7	0.504763	4.89855e-07
ENSG00000156876.8	SASS6	-0.47369	5.00395e-07
ENSG00000112697.11	TMEM30A	0.403967	5.17415e-07
ENSG00000166341.6	DCHS1	0.8248	5.37808e-07
ENSG00000197506.6	SLC28A3	0.57246	5.41053e-07
ENSG00000012048.15	BRCA1	-0.477207	5.52073e-07
ENSG00000205937.7	RNPS1	-0.449167	5.69886e-07
ENSG00000086200.12	IPO11	-0.347218	5.73296e-07
ENSG00000090861.11	AARS	-0.485662	5.81543e-07
ENSG00000137310.7	TCF19	-0.474997	5.91555e-07
ENSG00000127084.13	FGD3	0.433981	6.38414e-07
ENSG00000122483.13	CCDC18	-0.349528	6.6646e-07
ENSG00000142937.7	RPS8	-0.402243	6.69268e-07
ENSG00000111581.5	NUP107	-0.357989	7.25332e-07
ENSG00000128272.10	ATF4	-0.410044	7.48223e-07
ENSG00000127423.6	AUNIP	-0.669908	7.5303e-07
ENSG00000069275.12	NUCKS1	-0.27428	7.56779e-07
ENSG00000103313.7	MEFV	0.528467	7.56779e-07
ENSG00000165891.11	E2F7	-0.404523	7.56779e-07
ENSG00000089847.8	ANKRD24	0.859759	7.6478e-07
ENSG00000198056.9	PRIM1	-0.501295	7.92859e-07
ENSG00000213390.6	ARHGAP19	-0.366943	8.13469e-07
ENSG00000169252.4	ADRB2	0.453926	8.41563e-07
ENSG00000090889.10	KIF4A	-0.504433	8.41866e-07
ENSG00000189308.6	LIN54	-0.356763	8.7398e-07
ENSG00000064547.9	LPAR2	0.509369	9.01362e-07
ENSG00000143401.10	ANP32E	-0.403787	9.19922e-07
ENSG00000048392.7	RRM2B	0.396531	9.41052e-07
ENSG00000078900.10	TP73	-0.426058	9.74256e-07
ENSG00000168496.3	FEN1	-0.575481	9.74256e-07
ENSG00000172167.3	MTBP	-0.398936	9.74256e-07
ENSG00000161513.7	FDXR	0.667442	9.80481e-07
ENSG00000147536.7	GINS4	-0.510329	1.07125e-06
ENSG00000103222.14	ABCC1	0.285248	1.07235e-06
ENSG00000095002.8	MSH2	-0.375717	1.13835e-06
ENSG00000101224.13	CDC25B	-0.590925	1.13835e-06
ENSG00000100284.16	TOM1	0.37712	1.15713e-06
ENSG00000186185.9	KIF18B	-0.708302	1.17492e-06
ENSG00000184445.7	KNTC1	-0.394499	1.20834e-06
ENSG00000189362.7	TMEM194B	-0.549898	1.21431e-06
ENSG00000099998.13	GGT5	0.897143	1.23731e-06
ENSG00000185215.4	TNFAIP2	0.325422	1.27508e-06
ENSG00000161533.7	ACOX1	0.268283	1.34277e-06
ENSG00000123505.10	AMD1	-0.269823	1.53863e-06
ENSG00000176225.8	RTTN	-0.49944	1.59568e-06
ENSG00000100749.3	VRK1	-0.350116	1.67667e-06
ENSG00000149548.10	CCDC15	-0.500332	1.70707e-06
ENSG00000164104.7	HMGB2	-0.596886	1.75542e-06
ENSG00000151849.10	CENPJ	-0.391541	1.77801e-06
ENSG00000107738.15	C10orf54	0.462859	1.84445e-06
ENSG00000185480.7	PARPBP	-0.391136	1.89644e-06
ENSG00000173207.8	CKS1B	-0.526631	2.06504e-06
ENSG00000167703.10	SLC43A2	0.475088	2.08198e-06
ENSG00000074966.6	TXK	0.662566	2.15637e-06
ENSG00000113456.14	RAD1	-0.343728	2.18284e-06
ENSG00000183814.11	LIN9	-0.509775	2.23752e-06
ENSG00000014257.11	ACPP	0.539958	2.27035e-06
ENSG00000149636.11	DSN1	-0.362185	2.57712e-06
ENSG00000080824.14	HSP90AA1	-0.342009	2.58527e-06
ENSG00000177602.4	GSG2	-0.618165	2.59042e-06
ENSG00000117616.13	C1orf63	0.314156	2.65025e-06
ENSG00000112773.11	FAM46A	0.425344	2.73833e-06
ENSG00000167566.12	NCKAP5L	0.49989	2.87103e-06
ENSG00000132436.7	FIGNL1	-0.46709	2.8837e-06
ENSG00000076242.10	MLH1	-0.304685	2.90451e-06
ENSG00000171298.8	GAA	0.490579	2.92772e-06
ENSG00000166965.8	RCCD1	-0.4709	3.05002e-06
ENSG00000163803.8	PLB1	0.623831	3.05757e-06
ENSG00000087586.13	AURKA	-0.563895	3.14534e-06
ENSG00000111247.10	RAD51AP1	-0.356671	3.20932e-06
ENSG00000109881.12	CCDC34	-0.46932	3.23171e-06
ENSG00000138029.9	HADHB	0.223657	3.42732e-06
ENSG00000112242.10	E2F3	-0.383219	3.50276e-06
ENSG00000131153.4	GINS2	-0.47321	3.61721e-06
ENSG00000113407.9	TARS	-0.254243	3.74277e-06
ENSG00000113368.7	LMNB1	-0.464828	3.98961e-06
ENSG00000127586.12	CHTF18	-0.498615	4.08242e-06
ENSG00000099785.6	MARCH2	0.499661	4.19116e-06
ENSG00000136108.10	CKAP2	-0.278406	4.26996e-06
ENSG00000175063.12	UBE2C	-0.688006	4.33519e-06
ENSG00000156504.12	FAM122B	-0.311109	4.3371e-06
ENSG00000123485.7	HJURP	-0.584304	4.34434e-06
ENSG00000106105.9	GARS	-0.364384	4.48161e-06
ENSG00000186871.5	ERCC6L	-0.548748	4.78136e-06
ENSG00000122861.11	PLAU	0.306443	5.37162e-06
ENSG00000172954.9	LCLAT1	-0.36595	5.58146e-06
ENSG00000128944.9	KNSTRN	-0.593694	5.60576e-06
ENSG00000140678.12	ITGAX	0.600255	5.82874e-06
ENSG00000146410.7	MTFR2	-0.539061	5.82874e-06
ENSG00000160298.13	C21orf58	-0.499145	5.90265e-06
ENSG00000152455.11	SUV39H2	-0.296737	6.02358e-06
ENSG00000146670.5	CDCA5	-0.600635	6.0742e-06
ENSG00000196531.6	NACA	-0.410066	6.0742e-06
ENSG00000187790.6	FANCM	-0.369893	6.60408e-06
ENSG00000166851.10	PLK1	-0.687601	6.6327e-06
ENSG00000123219.8	CENPK	-0.462293	6.78662e-06
ENSG00000164985.10	PSIP1	-0.288451	6.78662e-06
ENSG00000124207.12	CSE1L	-0.321434	6.80534e-06
ENSG00000136518.12	ACTL6A	-0.264586	6.92728e-06
ENSG00000158402.14	CDC25C	-0.507183	7.1173e-06
ENSG00000014138.4	POLA2	-0.463575	7.38791e-06
ENSG00000214140.6	PRCD	1.10836	7.48949e-06
ENSG00000203814.5	HIST2H2BF	-0.743924	7.63388e-06
ENSG00000166451.9	CENPN	-0.430953	7.79572e-06
ENSG00000073146.11	MOV10L1	0.755435	7.91325e-06
ENSG00000111206.8	FOXM1	-0.671222	8.09852e-06
ENSG00000123338.8	NCKAP1L	0.309364	8.49269e-06
ENSG00000076382.12	SPAG5	-0.509548	8.69574e-06
ENSG00000091592.11	NLRP1	0.444609	8.82124e-06
ENSG00000141540.6	TTYH2	0.616131	9.13146e-06
ENSG00000105968.14	H2AFV	-0.284451	9.66637e-06
ENSG00000166508.13	MCM7	-0.56074	9.6776e-06
ENSG00000059588.5	TARBP1	0.330416	1.01019e-05
ENSG00000175216.10	CKAP5	-0.31635	1.07471e-05
ENSG00000203760.4	CENPW	-0.593618	1.08998e-05
ENSG00000127951.5	FGL2	0.380945	1.0969e-05
ENSG00000144136.6	SLC20A1	-0.274207	1.16423e-05
ENSG00000128928.4	IVD	0.332455	1.28335e-05
ENSG00000171115.3	GIMAP8	0.531907	1.33e-05
ENSG00000137462.6	TLR2	0.280983	1.49255e-05
ENSG00000197380.6	DACT3	0.516557	1.5544e-05
ENSG00000134684.6	YARS	-0.374363	1.61941e-05
ENSG00000123374.6	CDK2	-0.412406	1.62471e-05
ENSG00000167670.11	CHAF1A	-0.480976	1.69987e-05
ENSG00000173456.4	RNF26	-0.455034	1.78675e-05
ENSG00000117399.9	CDC20	-0.634797	1.86622e-05
ENSG00000117593.8	DARS2	-0.367664	1.86622e-05
ENSG00000127507.13	EMR2	0.281261	1.89887e-05
ENSG00000249437.3	NAIP	0.668699	1.92714e-05
ENSG00000154767.10	XPC	0.424575	1.959e-05
ENSG00000105223.14	PLD3	0.463558	2.01616e-05
ENSG00000092470.7	WDR76	-0.403671	2.04547e-05
ENSG00000151503.8	NCAPD3	-0.356515	2.1033e-05
ENSG00000127561.10	SYNGR3	1.11847	2.38617e-05
ENSG00000166927.8	MS4A7	0.451683	2.41855e-05
ENSG00000058091.12	CDK14	-0.679755	2.46089e-05
ENSG00000182287.9	AP1S2	0.347296	2.46919e-05
ENSG00000073910.15	FRY	0.358791	2.50867e-05
ENSG00000127585.7	FBXL16	0.948548	2.60212e-05
ENSG00000180694.9	TMEM64	-0.507626	2.60917e-05
ENSG00000116237.11	ICMT	-0.315595	2.61631e-05
ENSG00000120253.9	NUP43	-0.230559	2.61631e-05
ENSG00000163009.4	C2orf48	-0.844696	2.6322e-05
ENSG00000085999.7	RAD54L	-0.521778	2.71244e-05
ENSG00000178966.11	RMI1	-0.308821	2.79168e-05
ENSG00000170144.14	HNRNPA3	-0.258851	2.80825e-05
ENSG00000107077.13	KDM4C	0.265614	2.8094e-05
ENSG00000237649.3	KIFC1	-0.623292	3.01523e-05
ENSG00000166004.10	KIAA1731	-0.21346	3.0291e-05
ENSG00000196550.6	FAM72A	-0.624791	3.07458e-05
ENSG00000122566.16	HNRNPA2B1	-0.266185	3.21995e-05
ENSG00000182511.7	FES	0.415329	3.27053e-05
ENSG00000142676.8	RPL11	-0.779384	3.28024e-05
ENSG00000123737.8	EXOSC9	-0.335396	3.28789e-05
ENSG00000197122.7	SRC	0.40486	3.30399e-05
ENSG00000179163.11	FUCA1	0.462077	3.39602e-05
ENSG00000156253.2	RWDD2B	0.366335	3.41865e-05
ENSG00000188554.9	NBR1	0.258663	3.45296e-05
ENSG00000164045.7	CDC25A	-0.497186	3.4995e-05
ENSG00000178999.8	AURKB	-0.677492	3.4995e-05
ENSG00000042445.9	RETSAT	0.253676	3.5455e-05
ENSG00000174307.5	PHLDA3	0.476432	3.5455e-05
ENSG00000166801.11	FAM111A	-0.27312	3.58977e-05
ENSG00000197930.8	ERO1L	-0.315404	3.72204e-05
ENSG00000010292.8	NCAPD2	-0.437985	3.72946e-05
ENSG00000188229.5	TUBB4B	-0.376169	3.78891e-05
ENSG00000176890.11	TYMS	-0.353769	3.9494e-05
ENSG00000063046.13	EIF4B	-0.230917	3.96753e-05
ENSG00000105011.4	ASF1B	-0.553148	4.0256e-05
ENSG00000188243.8	COMMD6	0.316071	4.04642e-05
ENSG00000135778.7	NTPCR	0.317742	4.13542e-05
ENSG00000177000.6	MTHFR	0.307344	4.14403e-05
ENSG00000130517.9	PGPEP1	0.309693	4.17167e-05
ENSG00000141232.4	TOB1	0.321818	4.1834e-05
ENSG00000155974.7	GRIP1	0.681186	4.1834e-05
ENSG00000109685.13	WHSC1	-0.416558	4.22794e-05
ENSG00000066294.10	CD84	0.873988	4.27073e-05
ENSG00000145819.11	ARHGAP26	0.25761	4.32037e-05
ENSG00000104093.9	DMXL2	0.277375	4.43725e-05
ENSG00000103257.4	SLC7A5	-0.569042	4.49325e-05
ENSG00000134222.12	PSRC1	-0.673126	4.49325e-05
ENSG00000196220.11	SRGAP3	0.419831	4.75018e-05
ENSG00000086061.11	DNAJA1	-0.232706	4.77049e-05
ENSG00000198830.6	HMGN2	-0.355109	4.85265e-05
ENSG00000151062.10	CACNA2D4	0.328189	4.85597e-05
ENSG00000138780.10	GSTCD	-0.348287	5.24571e-05
ENSG00000109667.7	SLC2A9	0.349771	5.54818e-05
ENSG00000116717.7	GADD45A	0.520255	5.60236e-05
ENSG00000136122.11	BORA	-0.359214	5.63389e-05
ENSG00000124635.7	HIST1H2BJ	-0.603337	5.6343e-05
ENSG00000161217.7	PCYT1A	0.238951	5.66831e-05
ENSG00000146263.7	MMS22L	-0.369719	5.6947e-05
ENSG00000197872.7	FAM49A	0.337274	5.70423e-05
ENSG00000142798.12	HSPG2	0.429109	5.79605e-05
ENSG00000176533.8	GNG7	0.447559	5.79605e-05
ENSG00000115548.12	KDM3A	0.22481	5.82799e-05
ENSG00000104738.12	MCM4	-0.456048	5.86616e-05
ENSG00000166037.6	CEP57	-0.254075	5.86616e-05
ENSG00000111665.7	CDCA3	-0.636627	6.0699e-05
ENSG00000159055.3	MIS18A	-0.507933	6.0699e-05
ENSG00000164087.3	POC1A	-0.541141	6.0699e-05
ENSG00000172890.7	NADSYN1	0.381751	6.25176e-05
ENSG00000185432.10	METTL7A	0.660594	6.2822e-05
ENSG00000074696.8	PTPLAD1	-0.274937	6.7014e-05
ENSG00000186193.7	SAPCD2	-0.562847	6.92726e-05
ENSG00000100316.11	RPL3	-0.433964	7.08137e-05
ENSG00000123453.12	SARDH	0.423803	7.63085e-05
ENSG00000181938.9	GINS3	-0.506171	7.88896e-05
ENSG00000134627.7	PIWIL4	0.226779	7.90533e-05
ENSG00000004700.11	RECQL	-0.252663	7.91915e-05
ENSG00000171469.6	ZNF561	0.405906	7.96785e-05
ENSG00000025708.8	TYMP	0.390849	7.96859e-05
ENSG00000187741.10	FANCA	-0.45611	8.68397e-05
ENSG00000149503.8	INCENP	-0.50102	9.03318e-05
ENSG00000051180.12	RAD51	-0.501087	9.06308e-05
ENSG00000117139.12	KDM5B	0.20269	9.06546e-05
ENSG00000135045.6	C9orf40	-0.476089	9.27854e-05
ENSG00000124529.3	HIST1H4B	-0.605085	9.42022e-05
ENSG00000175711.4	B3GNTL1	0.321387	9.43952e-05
ENSG00000054277.8	OPN3	0.404925	9.44127e-05
ENSG00000135486.13	HNRNPA1	-0.338375	9.54633e-05
ENSG00000080839.7	RBL1	-0.343417	9.60347e-05
ENSG00000101945.12	SUV39H1	-0.564435	9.68888e-05
ENSG00000167380.12	ZNF226	0.33653	9.77267e-05
ENSG00000158406.2	HIST1H4H	-0.607826	9.79112e-05
ENSG00000082074.11	FYB	0.631156	9.83554e-05
ENSG00000111602.7	TIMELESS	-0.436003	9.9784e-05
ENSG00000072274.8	TFRC	-0.214352	0.000100693
ENSG00000128951.9	DUT	-0.33006	0.000103224
ENSG00000101574.10	METTL4	-0.458348	0.000103566
ENSG00000093072.11	CECR1	0.496759	0.000105076
ENSG00000197275.8	RAD54B	-0.510758	0.000105554
ENSG00000171724.2	VAT1L	-0.847546	0.000106272
ENSG00000206053.8	HN1L	-0.242522	0.000106965
ENSG00000171208.5	NETO2	-0.27095	0.000108355
ENSG00000148680.11	HTR7	0.475997	0.000108542
ENSG00000182611.3	HIST1H2AJ	-0.677662	0.000109188
ENSG00000118855.14	MFSD1	0.328455	0.000115365
ENSG00000148835.9	TAF5	-0.455577	0.000115935
ENSG00000185130.4	HIST1H2BL	-0.716896	0.000118916
ENSG00000196176.7	HIST1H4A	-0.648434	0.000119353
ENSG00000168528.7	SERINC2	0.393053	0.000119615
ENSG00000148488.11	ST8SIA6	0.460164	0.000120711
ENSG00000146278.10	PNRC1	0.35705	0.000128472
ENSG00000188610.8	FAM72B	-0.654492	0.000129824
ENSG00000183763.4	TRAIP	-0.501856	0.000130175
ENSG00000122952.12	ZWINT	-0.508376	0.000130926
ENSG00000137713.11	PPP2R1B	-0.225756	0.000131826
ENSG00000122966.9	CIT	-0.459111	0.000133307
ENSG00000095485.12	CWF19L1	-0.309782	0.000140037
ENSG00000148158.12	SNX30	0.262217	0.00014093
ENSG00000175198.10	PCCA	0.287871	0.000143573
ENSG00000103995.9	CEP152	-0.347839	0.000143834
ENSG00000120539.10	MASTL	-0.3335	0.000143834
ENSG00000197459.2	HIST1H2BH	-0.736502	0.000148384
ENSG00000114796.11	KLHL24	0.353748	0.000149751
ENSG00000042832.7	TG	0.893529	0.000151406
ENSG00000162063.8	CCNF	-0.542856	0.000152815
ENSG00000102974.10	CTCF	-0.267387	0.000153714
ENSG00000198300.8	PEG3	0.743722	0.000158835
ENSG00000255833.1	TIFAB	0.397288	0.000158835
ENSG00000108055.9	SMC3	-0.298198	0.000160384
ENSG00000131042.9	LILRB2	0.616849	0.000160384
ENSG00000136161.8	RCBTB2	0.38064	0.000161969
ENSG00000136854.13	STXBP1	0.365336	0.000165403
ENSG00000137154.8	RPS6	-0.371462	0.000168278
ENSG00000167005.9	NUDT21	-0.217648	0.000169199
ENSG00000112249.9	ASCC3	0.247023	0.000169896
ENSG00000213551.4	DNAJC9	-0.333885	0.000169896
ENSG00000145087.8	STXBP5L	-0.729388	0.000173584
ENSG00000139354.6	GAS2L3	-0.405766	0.00017407
ENSG00000185347.13	C14orf80	-0.535271	0.000174214
ENSG00000127311.5	HELB	0.317702	0.000175114
ENSG00000117305.10	HMGCL	0.370965	0.000176733
ENSG00000196331.5	HIST1H2BO	-0.654995	0.000176733
ENSG00000013573.12	DDX11	-0.379332	0.000181715
ENSG00000174125.3	TLR1	0.671263	0.000182305
ENSG00000204628.7	GNB2L1	-0.453388	0.000182305
ENSG00000089060.7	SLC8B1	0.333116	0.000183595
ENSG00000132016.7	C19orf57	-0.520836	0.000183963
ENSG00000146143.13	PRIM2	-0.293221	0.00019128
ENSG00000167528.8	ZNF641	0.33846	0.00019583
ENSG00000187650.3	VMAC	0.485748	0.00019583
ENSG00000007255.6	TRAPPC6A	0.470688	0.00019674
ENSG00000106399.7	RPA3	-0.349102	0.000197313
ENSG00000196715.5	VKORC1L1	-0.256904	0.000197313
ENSG00000127603.19	MACF1	0.178057	0.000198324
ENSG00000140743.3	CDR2	-0.401347	0.000202463
ENSG00000107960.6	OBFC1	0.333549	0.000208229
ENSG00000140451.8	PIF1	-0.681412	0.00021023
ENSG00000138346.10	DNA2	-0.355747	0.000210953
ENSG00000123836.10	PFKFB2	0.369415	0.000211559
ENSG00000134291.7	TMEM106C	-0.348312	0.000213412
ENSG00000184357.3	HIST1H1B	-0.666632	0.000218773
ENSG00000054965.6	FAM168A	0.235059	0.000220646
ENSG00000074660.11	SCARF1	0.685974	0.000220646
ENSG00000093009.5	CDC45	-0.53901	0.000234599
ENSG00000114850.2	SSR3	-0.229859	0.000235752
ENSG00000099337.3	KCNK6	0.35497	0.000238186
ENSG00000162897.10	FCAMR	0.67573	0.000245448
ENSG00000135862.5	LAMC1	-0.262845	0.000247137
ENSG00000172349.12	IL16	0.403833	0.000262888
ENSG00000164611.8	PTTG1	-0.455243	0.000262981
ENSG00000197061.3	HIST1H4C	-0.61642	0.000262981
ENSG00000162613.12	FUBP1	-0.173333	0.00026454
ENSG00000175662.13	TOM1L2	0.279219	0.00026454
ENSG00000196890.3	HIST3H2BB	-0.943638	0.00026454
ENSG00000152240.8	HAUS1	-0.313761	0.000265005
ENSG00000035928.10	RFC1	-0.187322	0.000265753
ENSG00000145592.9	RPL37	-0.558536	0.000267153
ENSG00000168071.17	CCDC88B	0.461722	0.000274653
ENSG00000135451.8	TROAP	-0.614209	0.000278269
ENSG00000143630.5	HCN3	-0.663962	0.000279604
ENSG00000213186.3	TRIM59	-0.317305	0.000280051
ENSG00000178996.8	SNX18	0.278801	0.00028234
ENSG00000064201.11	TSPAN32	0.36366	0.000282496
ENSG00000164070.7	HSPA4L	-0.261381	0.000288157
ENSG00000198382.4	UVRAG	0.224078	0.000291545
ENSG00000076248.6	UNG	-0.389098	0.00029274
ENSG00000080345.13	RIF1	-0.242454	0.00029274
ENSG00000139880.15	CDH24	-0.72124	0.00029274
ENSG00000162923.10	WDR26	0.211953	0.00029274
ENSG00000183044.7	ABAT	0.545262	0.000300796
ENSG00000136286.10	MYO1G	0.361619	0.000301868
ENSG00000168411.9	RFWD3	-0.323633	0.000301868
ENSG00000133302.8	ANKRD32	-0.379409	0.000302714
ENSG00000161888.7	SPC24	-0.55925	0.000305575
ENSG00000189298.9	ZKSCAN3	0.308825	0.000310232
ENSG00000135365.11	PHF21A	0.231307	0.000311789
ENSG00000197746.9	PSAP	0.37024	0.000311789
ENSG00000166813.10	KIF7	-0.641888	0.000312484
ENSG00000123975.4	CKS2	-0.47488	0.00033799
ENSG00000129667.8	RHBDF2	0.269546	0.000351838
ENSG00000143815.10	LBR	-0.290963	0.00035456
ENSG00000164010.9	ERMAP	0.330243	0.000369119
ENSG00000072501.13	SMC1A	-0.365779	0.000376005
ENSG00000204388.5	HSPA1B	-0.337957	0.000377449
ENSG00000197409.6	HIST1H3D	-0.741007	0.000377908
ENSG00000075702.12	WDR62	-0.537433	0.000402635
ENSG00000100433.11	KCNK10	0.518494	0.000402966
ENSG00000106462.6	EZH2	-0.331527	0.000402966
ENSG00000166845.9	C18orf54	-0.481584	0.000402966
ENSG00000172578.7	KLHL6	0.214858	0.000402966
ENSG00000101057.11	MYBL2	-0.631225	0.000403512
ENSG00000160219.7	GAB3	0.280195	0.00042128
ENSG00000124151.14	NCOA3	0.297935	0.000427989
ENSG00000240038.2	AMY2B	0.517243	0.000433823
ENSG00000109606.8	DHX15	-0.169763	0.000443081
ENSG00000185633.6	NDUFA4L2	-0.758829	0.000443081
ENSG00000043143.16	PHF15	-0.246836	0.000451958
ENSG00000268798.1	AC027307.3	-0.975116	0.000453754
ENSG00000079387.9	SENP1	-0.281869	0.00045873
ENSG00000167553.10	TUBA1C	-0.486478	0.000460739
ENSG00000133059.12	DSTYK	0.276619	0.000463145
ENSG00000181191.11	PJA1	-0.473427	0.000463175
ENSG00000012822.11	CALCOCO1	0.330346	0.000464818
ENSG00000168242.3	HIST1H2BI	-0.777543	0.000471242
ENSG00000183955.8	SETD8	-0.335317	0.000471242
ENSG00000197943.5	PLCG2	0.286977	0.000485808
ENSG00000005961.13	ITGA2B	0.681679	0.000486437
ENSG00000112118.13	MCM3	-0.430626	0.000486437
ENSG00000096063.10	SRPK1	-0.241384	0.000487509
ENSG00000125827.4	TMX4	-0.23333	0.000487509
ENSG00000139626.11	ITGB7	0.45162	0.000488932
ENSG00000130766.4	SESN2	0.496493	0.000489681
ENSG00000100271.12	TTLL1	0.4358	0.000501019
ENSG00000144401.10	METTL21A	-0.261152	0.000501421
ENSG00000235863.2	B3GALT4	0.468019	0.000514524
ENSG00000127220.5	ABHD8	0.41088	0.000515143
ENSG00000152795.13	HNRNPDL	-0.210516	0.000536
ENSG00000161970.8	RPL26	-0.765655	0.000536123
ENSG00000128595.12	CALU	-0.213807	0.000536927
ENSG00000168003.12	SLC3A2	-0.353153	0.000544979
ENSG00000198366.5	HIST1H3A	-0.628107	0.000545977
ENSG00000071539.9	TRIP13	-0.494403	0.000563831
ENSG00000120334.11	CENPL	-0.378654	0.000563831
ENSG00000173614.9	NMNAT1	0.399261	0.000563831
ENSG00000175155.4	YPEL2	0.360994	0.000563831
ENSG00000185189.11	NRBP2	0.47777	0.000578207
ENSG00000127564.12	PKMYT1	-0.572329	0.000578397
ENSG00000178104.15	PDE4DIP	0.434857	0.00057926
ENSG00000085840.8	ORC1	-0.488256	0.000579558
ENSG00000134690.6	CDCA8	-0.528787	0.000583401
ENSG00000162073.9	PAQR4	-0.401167	0.000583401
ENSG00000181544.9	FANCB	-0.461008	0.000584822
ENSG00000113569.11	NUP155	-0.278952	0.000590193
ENSG00000168274.3	HIST1H2AE	-0.687186	0.000594135
ENSG00000148655.10	C10orf11	0.411861	0.000595352
ENSG00000125977.6	EIF2S2	-0.264807	0.000596701
ENSG00000267106.1	C19orf82	0.468888	0.000603753
ENSG00000165233.13	C9orf89	0.321705	0.000606502
ENSG00000256655.1	TMEM75	0.551758	0.000607033
ENSG00000108960.3	MMD	-0.343403	0.000611682
ENSG00000144354.9	CDCA7	-0.253834	0.000611682
ENSG00000013364.14	MVP	0.326194	0.000620361
ENSG00000010610.5	CD4	0.358872	0.000622013
ENSG00000107551.16	RASSF4	0.331308	0.000622013
ENSG00000120008.11	WDR11	0.195523	0.000622013
ENSG00000196230.8	TUBB	-0.467706	0.000622338
ENSG00000204256.8	BRD2	-0.247459	0.000647982
ENSG00000221914.4	PPP2R2A	-0.226087	0.000649944
ENSG00000100599.11	RIN3	0.323118	0.000656077
ENSG00000118655.4	DCLRE1B	-0.366893	0.000656077
ENSG00000166619.8	BLCAP	0.199503	0.000663483
ENSG00000005238.15	FAM214B	0.353726	0.000665796
ENSG00000204389.8	HSPA1A	-0.312597	0.000667126
ENSG00000188613.5	NANOS1	-0.311437	0.000667476
ENSG00000256316.1	HIST1H3F	-0.630753	0.000675414
ENSG00000104324.11	CPQ	0.293103	0.000680668
ENSG00000108424.5	KPNB1	-0.2359	0.000720582
ENSG00000145604.11	SKP2	-0.320886	0.000720582
ENSG00000145569.5	FAM105A	0.29479	0.000731976
ENSG00000204406.7	MBD5	0.385256	0.000741777
ENSG00000196374.5	HIST1H2BM	-0.744338	0.000752582
ENSG00000118007.8	STAG1	-0.220361	0.000777327
ENSG00000167513.4	CDT1	-0.520901	0.000790589
ENSG00000169660.11	HEXDC	0.268112	0.000801244
ENSG00000175489.9	LRRC25	0.571289	0.00081668
ENSG00000198327.3	HIST1H4F	-0.559978	0.00081668
ENSG00000198755.6	RPL10A	-0.350764	0.000823146
ENSG00000100162.10	CENPM	-0.543072	0.000826403
ENSG00000137710.10	RDX	-0.24924	0.000826403
ENSG00000198223.10	CSF2RA	0.321058	0.000826771
ENSG00000166888.6	STAT6	0.245617	0.000835932
ENSG00000092036.12	HAUS4	-0.235474	0.00083813
ENSG00000075131.5	TIPIN	-0.378017	0.000860754
ENSG00000188486.3	H2AFX	-0.539024	0.000865472
ENSG00000185697.12	MYBL1	-0.403581	0.000870793
ENSG00000095970.12	TREM2	0.740427	0.000877082
ENSG00000100154.10	TTC28	0.255813	0.000888638
ENSG00000011600.7	TYROBP	0.535853	0.000890062
ENSG00000020922.8	MRE11A	-0.188901	0.000890062
ENSG00000070669.12	ASNS	-0.313683	0.000897397
ENSG00000077514.4	POLD3	-0.314406	0.000897397
ENSG00000116161.13	CACYBP	-0.349269	0.000897397
ENSG00000169813.12	HNRNPF	-0.289576	0.000898009
ENSG00000125726.6	CD70	0.789365	0.000899208
ENSG00000163006.7	CCDC138	-0.377501	0.000899208
ENSG00000149212.6	SESN3	0.449472	0.00091779
ENSG00000120699.8	EXOSC8	-0.326893	0.000930102
ENSG00000044574.7	HSPA5	-0.299967	0.000937782
ENSG00000079739.11	PGM1	-0.381023	0.000940723
ENSG00000166086.8	JAM3	-0.44838	0.000940723
ENSG00000116273.5	PHF13	-0.309549	0.000943701
ENSG00000187951.6	ARHGAP11B	-0.368164	0.000969182
ENSG00000122224.13	LY9	0.542659	0.000974652
ENSG00000155792.5	DEPTOR	0.331534	0.000974652
ENSG00000137404.10	NRM	-0.529702	0.000974731
ENSG00000131351.10	HAUS8	-0.455058	0.000982564
ENSG00000167004.8	PDIA3	-0.177538	0.000985203
ENSG00000084070.7	SMAP2	0.278072	0.000989788
ENSG00000100297.11	MCM5	-0.520426	0.00100252
ENSG00000168995.9	SIGLEC7	0.535226	0.00101864
ENSG00000183856.6	IQGAP3	-0.420199	0.00102733
ENSG00000185187.8	SIGIRR	0.296939	0.00102792
ENSG00000185818.7	NAT8L	-0.405993	0.00104436
ENSG00000197837.3	HIST4H4	-0.607114	0.00104436
ENSG00000073111.9	MCM2	-0.491592	0.00105231
ENSG00000078237.4	C12orf5	0.431515	0.00105231
ENSG00000101773.12	RBBP8	-0.296395	0.00105231
ENSG00000114841.13	DNAH1	0.288941	0.00107205
ENSG00000107521.14	HPS1	0.272237	0.00107903
ENSG00000137259.2	HIST1H2AB	-0.648678	0.00107903
ENSG00000110756.13	HPS5	0.257093	0.0010884
ENSG00000125657.3	TNFSF9	0.52262	0.0010884
ENSG00000149294.12	NCAM1	-1.09008	0.00109227
ENSG00000173846.8	PLK3	0.429003	0.0010931
ENSG00000124693.2	HIST1H3B	-0.628355	0.00109772
ENSG00000135829.12	DHX9	-0.201504	0.00111165
ENSG00000197153.3	HIST1H3J	-0.767671	0.00113482
ENSG00000106261.12	ZKSCAN1	0.180453	0.00115218
ENSG00000183401.7	CCDC159	0.364162	0.00115218
ENSG00000167842.11	MIS12	-0.312109	0.00116561
ENSG00000172936.8	MYD88	0.193214	0.00118193
ENSG00000158169.7	FANCC	-0.348303	0.00119722
ENSG00000120526.6	NUDCD1	-0.236493	0.00119832
ENSG00000133739.11	LRRCC1	-0.445932	0.00121661
ENSG00000142197.8	DOPEY2	0.237115	0.00124655
ENSG00000138594.8	TMOD3	-0.191415	0.00127308
ENSG00000184575.7	XPOT	-0.222728	0.00127308
ENSG00000139668.7	WDFY2	0.251904	0.00128048
ENSG00000077238.9	IL4R	0.246461	0.00130876
ENSG00000174083.13	PIK3R6	0.612905	0.00130876
ENSG00000141376.16	BCAS3	0.294622	0.00132684
ENSG00000165195.9	PIGA	-0.359643	0.00134093
ENSG00000071205.7	ARHGAP10	0.43276	0.00138609
ENSG00000135749.14	PCNXL2	0.502652	0.00138609
ENSG00000103196.7	CRISPLD2	1.09125	0.00140179
ENSG00000107798.13	LIPA	0.306638	0.00140463
ENSG00000125772.8	GPCPD1	0.330506	0.00140463
ENSG00000178685.9	PARP10	0.290835	0.00140463
ENSG00000181218.4	HIST3H2A	-0.563792	0.00140463
ENSG00000187676.7	B3GALTL	-0.50007	0.00144898
ENSG00000169093.10	ASMTL	0.314435	0.00145522
ENSG00000112343.8	TRIM38	0.31601	0.00146191
ENSG00000102524.7	TNFSF13B	0.383309	0.00147126
ENSG00000266714.2	MYO15B	0.355362	0.00148248
ENSG00000108379.5	WNT3	-0.947952	0.00150427
ENSG00000146281.5	PM20D2	-0.409538	0.00150527
ENSG00000167526.9	RPL13	-0.427152	0.0015135
ENSG00000149476.10	DAK	0.279396	0.00152097
ENSG00000180198.11	RCC1	-0.411079	0.00152287
ENSG00000079277.15	MKNK1	0.315852	0.00156227
ENSG00000033030.9	ZCCHC8	-0.231887	0.00157594
ENSG00000096060.10	FKBP5	-0.229608	0.00157594
ENSG00000204899.5	MZT1	-0.3474	0.00157851
ENSG00000115271.6	GCA	0.299288	0.0015938
ENSG00000142235.4	LMTK3	0.398255	0.0016257
ENSG00000148180.12	GSN	0.358571	0.00163767
ENSG00000129003.11	VPS13C	0.270392	0.00164151
ENSG00000143727.11	ACP1	-0.199692	0.00164151
ENSG00000075568.12	TMEM131	0.201529	0.00164392
ENSG00000137185.7	ZSCAN9	0.285403	0.00164392
ENSG00000196535.10	MYO18A	0.181454	0.00164392
ENSG00000173559.8	NABP1	0.425204	0.00166049
ENSG00000125845.6	BMP2	-0.560136	0.00167633
ENSG00000142657.16	PGD	0.266946	0.0016839
ENSG00000196576.10	PLXNB2	0.299289	0.00172581
ENSG00000122565.14	CBX3	-0.188911	0.00173184
ENSG00000141542.6	RAB40B	0.413183	0.00173184
ENSG00000164742.10	ADCY1	-0.41016	0.00173653
ENSG00000163867.12	ZMYM6	0.381304	0.00176209
ENSG00000164649.15	CDCA7L	-0.387447	0.0017628
ENSG00000196747.3	HIST1H2AI	-0.678278	0.0017628
ENSG00000079616.8	KIF22	-0.434969	0.00176915
ENSG00000136870.6	ZNF189	0.196326	0.00177069
ENSG00000132002.3	DNAJB1	-0.286802	0.00178487
ENSG00000087253.7	LPCAT2	0.30424	0.0017917
ENSG00000138834.8	MAPK8IP3	0.278906	0.00179918
ENSG00000176531.6	PHLDB3	0.36649	0.00179918
ENSG00000075826.12	SEC31B	0.493032	0.00179974
ENSG00000121774.13	KHDRBS1	-0.179264	0.00179974
ENSG00000197535.10	MYO5A	0.243626	0.00183805
ENSG00000152620.8	NADK2	-0.255625	0.00184018
ENSG00000147996.12	CBWD5	-0.463353	0.00185027
ENSG00000157240.2	FZD1	-0.37646	0.00185523
ENSG00000124126.9	PREX1	0.263315	0.00187704
ENSG00000130958.7	SLC35D2	0.558353	0.00187704
ENSG00000198185.7	ZNF334	0.339001	0.00188018
ENSG00000196226.2	HIST1H2BB	-0.678114	0.00188929
ENSG00000171132.9	PRKCE	0.442811	0.00190421
ENSG00000038210.9	PI4K2B	-0.276662	0.00193103
ENSG00000140044.8	JDP2	-0.334999	0.00195711
ENSG00000105483.12	CARD8	0.184697	0.00196001
ENSG00000011295.11	TTC19	0.232802	0.00196437
ENSG00000130158.9	DOCK6	0.294425	0.00196437
ENSG00000150995.13	ITPR1	0.269467	0.00196437
ENSG00000162631.14	NTNG1	1.28364	0.0019867
ENSG00000145050.11	MANF	-0.353912	0.00202178
ENSG00000179294.5	C17orf96	-0.659009	0.00203934
ENSG00000066135.8	KDM4A	0.237062	0.00204248
ENSG00000163002.8	NUP35	-0.291424	0.00205378
ENSG00000184270.3	HIST2H2AB	-0.550779	0.00205665
ENSG00000108852.10	MPP2	-0.808096	0.00206106
ENSG00000163257.6	DCAF16	-0.25173	0.00206106
ENSG00000107863.12	ARHGAP21	-0.326485	0.00206548
ENSG00000155660.6	PDIA4	-0.319994	0.00208042
ENSG00000166164.11	BRD7	-0.185316	0.00208733
ENSG00000124313.8	IQSEC2	0.358116	0.00209923
ENSG00000187990.4	HIST1H2BG	-0.628057	0.00211782
ENSG00000204469.8	PRRC2A	-0.405145	0.00211782
ENSG00000132780.12	NASP	-0.312519	0.00212651
ENSG00000116830.7	TTF2	-0.291781	0.00212892
ENSG00000180596.7	HIST1H2BC	-0.539792	0.00212892
ENSG00000105967.11	TFEC	0.311698	0.00215019
ENSG00000177084.12	POLE	-0.353569	0.00215019
ENSG00000119333.7	WDR34	-0.332883	0.00217369
ENSG00000169220.13	RGS14	0.301008	0.00218102
ENSG00000173218.10	VANGL1	-0.256581	0.00222672
ENSG00000128708.8	HAT1	-0.274853	0.00223033
ENSG00000128408.7	RIBC2	-0.416586	0.00224065
ENSG00000239713.3	APOBEC3G	0.292096	0.00224065
ENSG00000013810.14	TACC3	-0.443916	0.00230066
ENSG00000118557.11	PMFBP1	-0.486693	0.00230163
ENSG00000144034.10	TPRKB	-0.349372	0.00230163
ENSG00000143575.10	HAX1	-0.292215	0.0023017
ENSG00000256018.1	HIST1H3G	-0.623194	0.0023017
ENSG00000078070.7	MCCC1	0.259229	0.00231848
ENSG00000104043.10	ATP8B4	0.258453	0.00234197
ENSG00000178074.5	C2orf69	-0.256286	0.00234197
ENSG00000170222.11	ADPRM	0.364239	0.00238795
ENSG00000249115.4	HAUS5	-0.382051	0.00240291
ENSG00000087008.11	ACOX3	0.282255	0.00242909
ENSG00000132514.9	CLEC10A	0.68976	0.00242909
ENSG00000105849.5	TWISTNB	-0.342367	0.00246144
ENSG00000117407.12	ARTN	0.499474	0.00248308
ENSG00000121579.8	NAA50	-0.177086	0.00252095
ENSG00000147251.11	DOCK11	0.210398	0.00252095
ENSG00000173692.8	PSMD1	-0.190382	0.00252095
ENSG00000136367.12	ZFHX2	0.467717	0.00252437
ENSG00000100811.6	YY1	-0.180304	0.00255193
ENSG00000105327.11	BBC3	0.405051	0.00256639
ENSG00000125510.11	OPRL1	0.423072	0.00257659
ENSG00000188157.9	AGRN	0.188026	0.00257968
ENSG00000151466.7	SCLT1	-0.276533	0.00259313
ENSG00000052841.10	TTC17	0.202612	0.0026082
ENSG00000109971.9	HSPA8	-0.304495	0.00262832
ENSG00000165704.10	HPRT1	-0.236076	0.00262832
ENSG00000154920.10	EME1	-0.492737	0.00266104
ENSG00000153207.10	AHCTF1	-0.195267	0.002665
ENSG00000139410.10	SDSL	0.539262	0.00266616
ENSG00000267041.1	ZNF850	-0.305697	0.00267995
ENSG00000112290.8	WASF1	-0.651086	0.002748
ENSG00000165409.11	TSHR	0.682659	0.002748
ENSG00000102763.11	VWA8	0.199258	0.0028265
ENSG00000112081.12	SRSF3	-0.185831	0.0028265
ENSG00000213694.3	S1PR3	-0.641866	0.00283536
ENSG00000141858.7	SAMD1	-0.367654	0.00284548
ENSG00000181790.6	BAI1	0.441573	0.00284734
ENSG00000187837.2	HIST1H1C	-0.561856	0.00286115
ENSG00000178921.9	PFAS	-0.355634	0.00289389
ENSG00000175305.12	CCNE2	-0.285316	0.00290357
ENSG00000121064.8	SCPEP1	0.256416	0.00291306
ENSG00000168393.8	DTYMK	-0.44144	0.00291482
ENSG00000169258.6	GPRIN1	-0.475617	0.00293594
ENSG00000123416.11	TUBA1B	-0.415651	0.00294398
ENSG00000131944.5	C19orf40	-0.455453	0.00294768
ENSG00000074855.6	ANO8	0.318441	0.00297214
ENSG00000139350.7	NEDD1	-0.321561	0.00297214
ENSG00000170035.11	UBE2E3	-0.246537	0.00299866
ENSG00000138092.6	CENPO	-0.403383	0.00299918
ENSG00000221829.5	FANCG	-0.378166	0.00300742
ENSG00000177426.16	TGIF1	0.236189	0.00302102
ENSG00000105383.10	CD33	0.2726	0.00305122
ENSG00000167701.9	GPT	0.433809	0.00313534
ENSG00000177917.6	ARL6IP6	-0.278195	0.00313962
ENSG00000137337.10	MDC1	-0.36217	0.00317146
ENSG00000118363.7	SPCS2	-0.230512	0.00317148
ENSG00000130714.11	POMT1	0.319954	0.00317148
ENSG00000183598.3	HIST2H3D	-0.616475	0.00318026
ENSG00000105204.9	DYRK1B	0.366327	0.00330571
ENSG00000086827.4	ZW10	-0.247758	0.00331217
ENSG00000160131.9	VMA21	-0.205312	0.00331217
ENSG00000168538.11	TRAPPC11	0.195992	0.00331328
ENSG00000110958.11	PTGES3	-0.196005	0.00337545
ENSG00000181523.8	SGSH	0.546053	0.00341343
ENSG00000100714.11	MTHFD1	-0.363263	0.00341991
ENSG00000225830.6	ERCC6	0.324033	0.00347006
ENSG00000172803.13	SNX32	0.416362	0.00348676
ENSG00000137802.9	MAPKBP1	0.248262	0.00351184
ENSG00000155561.10	NUP205	-0.251267	0.00351184
ENSG00000167103.7	PIP5KL1	0.477156	0.00351567
ENSG00000115457.5	IGFBP2	-0.244944	0.00352418
ENSG00000144746.6	ARL6IP5	0.237782	0.00352418
ENSG00000241343.5	RPL36A	-0.311	0.00352418
ENSG00000104147.4	OIP5	-0.501037	0.00353511
ENSG00000101255.6	TRIB3	-0.559603	0.0035394
ENSG00000171502.10	COL24A1	0.426732	0.0035394
ENSG00000077152.5	UBE2T	-0.438378	0.00361024
ENSG00000095209.7	TMEM38B	-0.237533	0.00361367
ENSG00000182504.6	CEP97	-0.284126	0.00361367
ENSG00000120889.8	TNFRSF10B	0.452659	0.00362057
ENSG00000007968.6	E2F2	-0.471346	0.00362412
ENSG00000184348.2	HIST1H2AK	-0.650617	0.00365383
ENSG00000089486.12	CDIP1	0.314648	0.00366039
ENSG00000179152.14	TCAIM	0.254475	0.00366692
ENSG00000100479.8	POLE2	-0.359612	0.00370401
ENSG00000083642.14	PDS5B	-0.187504	0.00370418
ENSG00000197375.8	SLC22A5	0.359919	0.00370685
ENSG00000197846.3	HIST1H2BF	-0.630622	0.00372117
ENSG00000137168.7	PPIL1	-0.236623	0.00374239
ENSG00000114573.5	ATP6V1A	0.240531	0.00374549
ENSG00000234745.5	HLA-B	0.221505	0.00374874
ENSG00000026103.15	FAS	0.461955	0.00375046
ENSG00000183828.10	NUDT14	0.295315	0.00375046
ENSG00000011028.9	MRC2	0.238918	0.00376631
ENSG00000197343.6	ZNF655	0.214728	0.0037802
ENSG00000166159.6	LRTM2	0.521769	0.00383725
ENSG00000205592.9	MUC19	0.39259	0.00383725
ENSG00000166226.8	CCT2	-0.215142	0.00388828
ENSG00000069399.8	BCL3	0.395536	0.00389088
ENSG00000184825.4	HIST1H2AH	-0.596047	0.00389785
ENSG00000231500.2	RPS18	-0.486991	0.00390511
ENSG00000203813.4	HIST1H3H	-0.629562	0.00391207
ENSG00000008869.7	HEATR5B	0.215043	0.00394531
ENSG00000169994.14	MYO7B	0.733764	0.00397367
ENSG00000006025.7	OSBPL7	0.319606	0.00402049
ENSG00000178409.9	BEND3	-0.487454	0.00402983
ENSG00000082153.13	BZW1	-0.245254	0.00406969
ENSG00000149485.12	FADS1	-0.402336	0.00409707
ENSG00000051596.5	THOC3	-0.317751	0.00410165
ENSG00000213762.6	ZNF134	0.282106	0.00410723
ENSG00000141551.10	CSNK1D	-0.182021	0.00411766
ENSG00000171174.9	RBKS	0.324902	0.00411766
ENSG00000170852.6	KBTBD2	-0.180547	0.00413683
ENSG00000166928.6	MS4A14	0.652012	0.00414497
ENSG00000144395.13	CCDC150	-0.43863	0.00415661
ENSG00000198339.3	HIST1H4I	-0.656903	0.00417426
ENSG00000074695.5	LMAN1	-0.178176	0.0041757
ENSG00000123104.7	ITPR2	0.230577	0.00417911
ENSG00000137135.13	ARHGEF39	-0.488618	0.00424054
ENSG00000101412.9	E2F1	-0.439021	0.00427259
ENSG00000244462.3	RBM12	-0.176485	0.00427416
ENSG00000168890.9	TMEM150A	0.388015	0.00429956
ENSG00000131876.12	SNRPA1	-0.226559	0.00431586
ENSG00000188878.12	FBF1	-0.366553	0.00432702
ENSG00000104889.4	RNASEH2A	-0.430737	0.00433029
ENSG00000150540.9	HNMT	0.223626	0.00434635
ENSG00000100629.12	CEP128	-0.28769	0.00441223
ENSG00000113460.8	BRIX1	-0.219234	0.00441223
ENSG00000136938.8	ANP32B	-0.340502	0.00443923
ENSG00000138658.11	C4orf21	-0.303024	0.00445765
ENSG00000122085.12	MTERFD2	0.227802	0.00447803
ENSG00000123080.6	CDKN2C	-0.465013	0.00449758
ENSG00000242732.3	RGAG4	0.402159	0.00452433
ENSG00000082397.11	EPB41L3	0.401752	0.00455487
ENSG00000108671.5	PSMD11	-0.244327	0.00455487
ENSG00000197965.7	MPZL1	0.310338	0.00455487
ENSG00000160957.8	RECQL4	-0.337069	0.00459834
ENSG00000160447.6	PKN3	-0.352919	0.00460711
ENSG00000160602.9	NEK8	-0.615689	0.00460711
ENSG00000187210.8	GCNT1	0.250238	0.00460711
ENSG00000106355.5	LSM5	-0.272835	0.00460999
ENSG00000170540.10	ARL6IP1	-0.189026	0.00462804
ENSG00000188312.9	CENPP	-0.294102	0.00469883
ENSG00000215271.6	HOMEZ	0.301939	0.00478552
ENSG00000135316.13	SYNCRIP	-0.163986	0.00483007
ENSG00000132141.9	CCT6B	0.529697	0.00483984
ENSG00000100647.7	KIAA0247	0.199849	0.00491788
ENSG00000177150.8	FAM210A	-0.25281	0.00494891
ENSG00000185928.7	PAGR1	-0.463014	0.0049885
ENSG00000184465.11	WDR27	0.3406	0.0049991
ENSG00000152192.6	POU4F1	-1.26612	0.00500987
ENSG00000094880.6	CDC23	-0.19623	0.00502185
ENSG00000139133.2	ALG10	-0.461986	0.00503736
ENSG00000189339.7	SLC35E2B	0.164205	0.00505851
ENSG00000112208.10	BAG2	-0.276696	0.00506674
ENSG00000166436.11	TRIM66	0.269355	0.00506674
ENSG00000110172.7	CHORDC1	-0.218877	0.00509319
ENSG00000118960.8	HS1BP3	0.280249	0.00511632
ENSG00000185088.8	RPS27L	0.297488	0.00517197
ENSG00000065150.14	IPO5	-0.227607	0.00519139
ENSG00000196532.4	HIST1H3C	-0.657653	0.00524699
ENSG00000113269.9	RNF130	0.242055	0.0052507
ENSG00000159348.8	CYB5R1	0.231152	0.00525525
ENSG00000128050.4	PAICS	-0.318477	0.00528931
ENSG00000054219.9	LY75	0.382861	0.00529139
ENSG00000184937.8	WT1	-0.41341	0.00531024
ENSG00000083799.13	CYLD	0.262735	0.00536758
ENSG00000147324.6	MFHAS1	-0.230644	0.00546471
ENSG00000030582.12	GRN	0.287272	0.00551734
ENSG00000132549.14	VPS13B	0.222877	0.00552576
ENSG00000110934.6	BIN2	0.287061	0.00553662
ENSG00000133460.15	SLC2A11	0.473003	0.00556843
ENSG00000157212.14	PAXIP1	-0.260545	0.00559408
ENSG00000144283.17	PKP4	-0.203761	0.0056188
ENSG00000197697.3	HIST1H2BE	-0.613761	0.00562094
ENSG00000128294.11	TPST2	0.275154	0.00566862
ENSG00000188938.11	FAM120AOS	0.26259	0.00570507
ENSG00000112799.4	LY86	0.45334	0.00571019
ENSG00000139514.8	SLC7A1	-0.317025	0.0057762
ENSG00000120837.3	NFYB	-0.304293	0.00582984
ENSG00000173674.6	EIF1AX	-0.194795	0.00584945
ENSG00000100360.10	IFT27	0.221744	0.00586439
ENSG00000159147.13	DONSON	-0.225617	0.00588242
ENSG00000166428.8	PLD4	0.390678	0.00599842
ENSG00000145354.5	CISD2	-0.294114	0.00602722
ENSG00000114999.7	TTL	-0.226261	0.00602807
ENSG00000171603.12	CLSTN1	0.140009	0.00604465
ENSG00000130713.11	EXOSC2	-0.322043	0.00612209
ENSG00000182950.2	ODF3L1	0.598321	0.0061768
ENSG00000171914.10	TLN2	0.437018	0.00618707
ENSG00000141140.12	MYO19	-0.287837	0.00622311
ENSG00000089916.13	GPATCH2L	0.194479	0.00622498
ENSG00000096968.8	JAK2	0.269611	0.00626095
ENSG00000121671.7	CRY2	0.260816	0.0062755
ENSG00000040933.11	INPP4A	0.260692	0.00628217
ENSG00000087589.12	CASS4	0.86761	0.00630088
ENSG00000204131.6	NHSL2	0.862613	0.0063096
ENSG00000112685.9	EXOC2	0.199694	0.00636377
ENSG00000143119.8	CD53	0.187515	0.00637605
ENSG00000233822.3	HIST1H2BN	-0.530596	0.00638994
ENSG00000152422.11	XRCC4	-0.306128	0.00640546
ENSG00000187231.9	SESTD1	-0.403446	0.00645769
ENSG00000113108.13	APBB3	0.320854	0.00647877
ENSG00000116985.6	BMP8B	-0.347571	0.00653132
ENSG00000181722.11	ZBTB20	0.663243	0.00667761
ENSG00000101439.4	CST3	0.403821	0.00670436
ENSG00000166598.8	HSP90B1	-0.206405	0.00675189
ENSG00000129450.4	SIGLEC9	0.749353	0.00677319
ENSG00000121644.14	DESI2	-0.204923	0.00677624
ENSG00000205476.4	CCDC85C	-0.249928	0.00677624
ENSG00000119686.5	FLVCR2	0.397645	0.00678902
ENSG00000108106.9	UBE2S	-0.540529	0.00680111
ENSG00000127337.2	YEATS4	-0.287222	0.00684563
ENSG00000099958.10	DERL3	-0.386503	0.00685102
ENSG00000010310.4	GIPR	0.55484	0.00688653
ENSG00000115541.6	HSPE1	-0.336147	0.00689387
ENSG00000127824.9	TUBA4A	-0.414354	0.00690042
ENSG00000135605.8	TEC	0.211309	0.00690042
ENSG00000148832.10	PAOX	0.397568	0.00690042
ENSG00000163362.6	C1orf106	-0.322643	0.00690042
ENSG00000166046.6	TCP11L2	0.548786	0.00690042
ENSG00000130684.9	ZNF337	0.436632	0.00691374
ENSG00000144712.7	CAND2	-0.740219	0.00696096
ENSG00000164237.4	CMBL	0.544025	0.00699564
ENSG00000151065.9	DCP1B	0.385505	0.00716296
ENSG00000110455.9	ACCS	0.318942	0.00718012
ENSG00000105993.10	DNAJB6	-0.156665	0.0072119
ENSG00000196663.11	TECPR2	0.20951	0.00721548
ENSG00000178209.10	PLEC	0.211776	0.00724511
ENSG00000151176.3	PLBD2	0.321495	0.00727416
ENSG00000012963.9	UBR7	-0.220464	0.00729389
ENSG00000142733.10	MAP3K6	-0.340467	0.00729389
ENSG00000185278.10	ZBTB37	0.272815	0.00732773
ENSG00000143870.8	PDIA6	-0.225793	0.00734857
ENSG00000004897.7	CDC27	-0.144611	0.00739339
ENSG00000125319.10	C17orf53	-0.477483	0.00739339
ENSG00000054282.11	SDCCAG8	0.201068	0.00744838
ENSG00000114867.15	EIF4G1	-0.313148	0.00744838
ENSG00000128965.7	CHAC1	-0.618771	0.00744838
ENSG00000108064.6	TFAM	-0.221638	0.00755989
ENSG00000130294.10	KIF1A	0.901955	0.00757473
ENSG00000186635.10	ARAP1	0.22062	0.00760607
ENSG00000157873.13	TNFRSF14	0.311145	0.00762048
ENSG00000179981.9	TSHZ1	-0.266443	0.00787759
ENSG00000104888.5	SLC17A7	-0.953559	0.0079249
ENSG00000110074.6	FOXRED1	-0.306376	0.00795951
ENSG00000254827.1	SLC22A18AS	0.808902	0.00798201
ENSG00000011523.9	CEP68	0.226946	0.00800168
ENSG00000104472.5	CHRAC1	-0.293037	0.00800168
ENSG00000134962.6	KLB	-0.790104	0.00800168
ENSG00000167900.7	TK1	-0.449528	0.00800168
ENSG00000177675.4	CD163L1	0.40619	0.00800168
ENSG00000197302.6	ZNF720	0.280948	0.00800168
ENSG00000148688.9	RPP30	-0.210117	0.00801602
ENSG00000076351.8	SLC46A1	0.616697	0.0081072
ENSG00000186074.14	CD300LF	0.370664	0.00822482
ENSG00000114450.5	GNB4	-0.207439	0.00823188
ENSG00000048471.9	SNX29	0.192512	0.00843724
ENSG00000134955.7	SLC37A2	0.347513	0.00845427
ENSG00000139624.8	CERS5	0.291045	0.00852157
ENSG00000137364.4	TPMT	0.270721	0.00853078
ENSG00000116497.13	S100PBP	-0.19681	0.00856687
ENSG00000166986.8	MARS	-0.255514	0.00857998
ENSG00000162623.11	TYW3	-0.245287	0.00865095
ENSG00000140450.7	ARRDC4	0.438732	0.0086577
ENSG00000168944.11	CEP120	-0.200656	0.00867778
ENSG00000171236.9	LRG1	0.298198	0.00875696
ENSG00000178752.11	FAM132B	-0.617926	0.00876965
ENSG00000180233.9	ZNRF2	0.178623	0.0087952
ENSG00000033627.10	ATP6V0A1	0.280306	0.00888214
ENSG00000128059.4	PPAT	-0.216801	0.00888214
ENSG00000184588.13	PDE4B	0.772459	0.00888633
ENSG00000204859.7	ZBTB48	0.268998	0.0089164
ENSG00000164284.10	GRPEL2	-0.218446	0.00891841
ENSG00000184635.9	ZNF93	-0.354069	0.00899043
ENSG00000101342.5	TLDC2	0.421753	0.00900682
ENSG00000173198.4	CYSLTR1	0.324391	0.00901024
ENSG00000198937.8	CCDC167	-0.483343	0.00906088
ENSG00000103091.10	WDR59	0.205399	0.00906179
ENSG00000043462.7	LCP2	0.221652	0.00908528
ENSG00000146842.12	TMEM209	-0.237139	0.00910839
ENSG00000178226.6	PRSS36	0.672846	0.00912657
ENSG00000006638.7	TBXA2R	-0.897842	0.00913698
ENSG00000111271.10	ACAD10	0.259457	0.00915132
ENSG00000145833.11	DDX46	-0.235522	0.00915475
ENSG00000107036.7	KIAA1432	0.176311	0.00918624
ENSG00000138463.8	DIRC2	0.448982	0.00925649
ENSG00000160271.10	RALGDS	0.237902	0.00925649
ENSG00000165501.12	LRR1	-0.319347	0.00925649
ENSG00000198740.4	ZNF652	0.20726	0.00925649
ENSG00000184261.4	KCNK12	-0.816484	0.00933838
ENSG00000197142.6	ACSL5	-0.367689	0.00940401
ENSG00000100612.9	DHRS7	0.209199	0.00941539
ENSG00000113504.15	SLC12A7	0.253379	0.00941539
ENSG00000198558.2	HIST1H4L	-0.893306	0.00944119
ENSG00000198677.6	TTC37	0.206563	0.00957381
ENSG00000025770.14	NCAPH2	-0.37453	0.00968281
ENSG00000109184.10	DCUN1D4	-0.292406	0.00971801
ENSG00000159423.12	ALDH4A1	0.328399	0.00971801
ENSG00000178397.8	FAM220A	0.232426	0.00975104
ENSG00000148450.8	MSRB2	0.377145	0.00990369
ENSG00000132906.13	CASP9	0.248222	0.00994329
ENSG00000122484.8	RPAP2	0.224735	0.00998759
ENSG00000110665.7	C11orf21	0.341423	0.0100004
ENSG00000174776.6	WDR49	0.30787	0.0100004
ENSG00000161911.7	TREML1	0.829221	0.0100804
ENSG00000115738.5	ID2	0.270362	0.0101128
ENSG00000105750.10	ZNF85	-0.365423	0.0101235
ENSG00000173992.4	CCS	0.295796	0.0101553
ENSG00000125735.6	TNFSF14	0.434234	0.010215
ENSG00000149428.14	HYOU1	-0.287537	0.0103308
ENSG00000075399.8	VPS9D1	0.264448	0.0103458
ENSG00000090238.7	YPEL3	0.426194	0.0103458
ENSG00000101608.8	MYL12A	0.171287	0.0103458
ENSG00000131558.10	EXOC4	0.15718	0.0103458
ENSG00000132718.7	SYT11	-0.882105	0.0103458
ENSG00000135823.9	STX6	0.197584	0.0103458
ENSG00000155926.9	SLA	0.437374	0.0103458
ENSG00000135617.3	PRADC1	0.371013	0.0103621
ENSG00000158106.8	RHPN1	0.336964	0.0103621
ENSG00000205356.5	TECPR1	0.237701	0.0103621
ENSG00000137574.6	TGS1	-0.184748	0.0104339
ENSG00000196547.10	MAN2A2	0.256515	0.0105659
ENSG00000117411.12	B4GALT2	-0.389527	0.0106011
ENSG00000130826.11	DKC1	-0.205693	0.0106011
ENSG00000131069.15	ACSS2	0.215225	0.0106643
ENSG00000103121.4	CMC2	-0.246917	0.0106778
ENSG00000124610.3	HIST1H1A	-0.597292	0.0107103
ENSG00000158805.7	ZNF276	0.255234	0.0107242
ENSG00000160325.10	CACFD1	0.342647	0.0108225
ENSG00000130304.12	SLC27A1	0.18384	0.0108596
ENSG00000151876.8	FBXO4	-0.258893	0.0108605
ENSG00000010295.15	IFFO1	0.27675	0.0109429
ENSG00000185420.14	SMYD3	0.262258	0.0109429
ENSG00000010322.11	NISCH	0.234184	0.0109626
ENSG00000134308.9	YWHAQ	-0.180759	0.0109714
ENSG00000196372.8	ASB13	0.224565	0.0109723
ENSG00000198860.7	TSEN15	-0.189803	0.0109962
ENSG00000153879.4	CEBPG	-0.130871	0.0110849
ENSG00000012817.11	KDM5D	0.231964	0.01109
ENSG00000123562.12	MORF4L2	-0.161087	0.0112176
ENSG00000111196.5	MAGOHB	-0.231624	0.011232
ENSG00000099338.18	CATSPERG	0.505185	0.0112344
ENSG00000184863.6	RBM33	0.177968	0.01131
ENSG00000161692.13	DBF4B	-0.382476	0.0113401
ENSG00000225190.4	PLEKHM1	0.249302	0.0113401
ENSG00000151461.15	UPF2	-0.196298	0.0113426
ENSG00000164597.9	COG5	0.183217	0.0113426
ENSG00000196154.7	S100A4	0.284861	0.0113426
ENSG00000161016.11	RPL8	-0.441475	0.0113629
ENSG00000108306.7	FBXL20	0.229882	0.0113736
ENSG00000151929.5	BAG3	-0.248265	0.0113736
ENSG00000168556.5	ING2	-0.439322	0.0114205
ENSG00000158985.9	CDC42SE2	0.209262	0.0114233
ENSG00000178537.5	SLC25A20	0.326933	0.0114293
ENSG00000214021.11	TTLL3	0.269988	0.0114517
ENSG00000005801.12	ZNF195	0.216611	0.0114853
ENSG00000143369.10	ECM1	-0.552792	0.0114853
ENSG00000019582.10	CD74	0.340046	0.0115405
ENSG00000186567.8	CEACAM19	0.625388	0.0116777
ENSG00000103249.13	CLCN7	0.248402	0.0118141
ENSG00000204287.9	HLA-DRA	0.447023	0.011884
ENSG00000253729.3	PRKDC	-0.219865	0.0118973
ENSG00000103187.6	COTL1	0.29826	0.0120378
ENSG00000140403.8	DNAJA4	-0.196897	0.0120378
ENSG00000140564.6	FURIN	0.217922	0.0121966
ENSG00000196290.10	NIF3L1	-0.231189	0.0121996
ENSG00000136068.10	FLNB	0.22415	0.0122453
ENSG00000073464.7	CLCN4	0.570778	0.0122494
ENSG00000015171.14	ZMYND11	-0.198218	0.0123321
ENSG00000004478.5	FKBP4	-0.391471	0.0124089
ENSG00000197386.6	HTT	0.206499	0.0124741
ENSG00000088305.14	DNMT3B	-0.42211	0.0125474
ENSG00000177272.7	KCNA3	-0.66208	0.0125602
ENSG00000170860.3	LSM3	-0.282125	0.0126703
ENSG00000213160.5	KLHL23	-0.781632	0.0126718
ENSG00000115310.13	RTN4	-0.141181	0.0126827
ENSG00000163072.10	NOSTRIN	-0.473071	0.012725
ENSG00000183558.5	HIST2H2AA3	-1.37835	0.0127957
ENSG00000136169.12	SETDB2	0.179415	0.012804
ENSG00000138757.10	G3BP2	-0.141124	0.0128111
ENSG00000181666.13	HKR1	0.253434	0.0129521
ENSG00000205531.8	NAP1L4	-0.170078	0.0129521
ENSG00000235568.2	NFAM1	0.301578	0.0129598
ENSG00000134759.9	ELP2	0.15743	0.0129717
ENSG00000101236.12	RNF24	0.20858	0.0129863
ENSG00000102893.11	PHKB	0.185245	0.0129864
ENSG00000127884.4	ECHS1	0.255083	0.0129905
ENSG00000187554.7	TLR5	0.565773	0.012999
ENSG00000109906.9	ZBTB16	-0.452476	0.0130743
ENSG00000066044.9	ELAVL1	-0.21044	0.0132316
ENSG00000130816.10	DNMT1	-0.317736	0.0133781
ENSG00000104774.8	MAN2B1	0.332074	0.0134552
ENSG00000066697.10	MSANTD3	-0.399406	0.0134646
ENSG00000184566.2	AC132216.1	0.329652	0.0134935
ENSG00000139990.13	DCAF5	0.156282	0.0134991
ENSG00000165948.6	IFI27L1	-0.366896	0.0136124
ENSG00000145907.10	G3BP1	-0.175972	0.0136127
ENSG00000165675.12	ENOX2	-0.21192	0.0136127
ENSG00000213967.6	ZNF726	-0.508745	0.0136127
ENSG00000167785.4	ZNF558	0.278575	0.0136174
ENSG00000120438.7	TCP1	-0.198588	0.0138074
ENSG00000162994.11	CLHC1	0.386589	0.0138763
ENSG00000164338.5	UTP15	-0.226717	0.0139624
ENSG00000171566.7	PLRG1	-0.16289	0.0140641
ENSG00000117289.7	TXNIP	0.416097	0.0140695
ENSG00000120647.5	CCDC77	-0.307572	0.0142024
ENSG00000188818.8	ZDHHC11	-0.392132	0.014334
ENSG00000168298.4	HIST1H1E	-0.542763	0.0144007
ENSG00000118971.3	CCND2	0.512251	0.0144488
ENSG00000083312.13	TNPO1	-0.186765	0.014522
ENSG00000181418.7	DDN	-1.12502	0.014522
ENSG00000139055.2	ERP27	0.562179	0.0145409
ENSG00000161544.5	CYGB	1.00442	0.0147675
ENSG00000082068.4	WDR70	0.171032	0.014768
ENSG00000128322.6	IGLL1	-1.42844	0.0147685
ENSG00000135916.11	ITM2C	0.357819	0.0147685
ENSG00000108578.10	BLMH	-0.19537	0.0147982
ENSG00000166501.8	PRKCB	0.223639	0.0147982
ENSG00000170779.10	CDCA4	-0.373658	0.0147982
ENSG00000185591.5	SP1	-0.144699	0.0148003
ENSG00000256043.2	CTSO	0.484584	0.0148547
ENSG00000114054.9	PCCB	0.309362	0.0148847
ENSG00000149781.8	FERMT3	0.307252	0.0148847
ENSG00000214050.3	FBXO16	0.548963	0.014918
ENSG00000167771.5	RCOR2	0.353401	0.0150716
ENSG00000179218.9	CALR	-0.33863	0.0151063
ENSG00000120800.4	UTP20	-0.203963	0.0151804
ENSG00000120948.11	TARDBP	-0.157602	0.0153161
ENSG00000197852.8	FAM212B	0.381791	0.0153209
ENSG00000059377.11	TBXAS1	0.382645	0.0154065
ENSG00000111664.6	GNB3	-0.834739	0.0154065
ENSG00000131462.3	TUBG1	-0.397475	0.0154065
ENSG00000178719.12	GRINA	0.296723	0.0154065
ENSG00000184678.8	HIST2H2BE	-0.480223	0.0154987
ENSG00000017483.10	SLC38A5	-0.433476	0.0155444
ENSG00000165732.8	DDX21	-0.243357	0.0155519
ENSG00000178691.6	SUZ12	-0.19379	0.0155922
ENSG00000162946.16	DISC1	0.247197	0.0155975
ENSG00000104974.6	LILRA1	0.335827	0.0156518
ENSG00000175482.4	POLD4	0.409681	0.0156518
ENSG00000055044.6	NOP58	-0.214605	0.0156666
ENSG00000147174.7	ACRC	0.464132	0.0157114
ENSG00000147475.10	ERLIN2	0.16108	0.0157114
ENSG00000149577.11	SIDT2	0.231582	0.0157114
ENSG00000135776.4	ABCB10	-0.276781	0.0157122
ENSG00000153944.6	MSI2	0.251737	0.0157204
ENSG00000176974.13	SHMT1	-0.287632	0.0157667
ENSG00000112039.3	FANCE	-0.338855	0.0157805
ENSG00000166938.8	DIS3L	-0.218754	0.0158413
ENSG00000157445.10	CACNA2D3	0.381085	0.0159019
ENSG00000173821.15	RNF213	0.253394	0.0159284
ENSG00000147224.6	PRPS1	-0.231228	0.0159424
ENSG00000162572.15	SCNN1D	0.455561	0.0159439
ENSG00000163386.16	NBPF10	0.342404	0.0159746
ENSG00000119403.9	PHF19	-0.344896	0.0160082
ENSG00000160305.13	DIP2A	0.175116	0.0160102
ENSG00000139278.5	GLIPR1	0.391472	0.0161552
ENSG00000182199.6	SHMT2	-0.307491	0.0163835
ENSG00000164002.7	EXO5	-0.361038	0.0165281
ENSG00000168175.10	MAPK1IP1L	-0.193558	0.0165281
ENSG00000042088.9	TDP1	-0.250106	0.0165957
ENSG00000133111.3	RFXAP	-0.255489	0.0165957
ENSG00000203812.2	HIST2H2AA4	-2.50743	0.0165957
ENSG00000165417.7	GTF2A1	-0.185298	0.0166414
ENSG00000103657.9	HERC1	0.160755	0.0167475
ENSG00000136279.14	DBNL	0.219608	0.0168259
ENSG00000152684.10	PELO	-0.264899	0.0168697
ENSG00000172172.3	MRPL13	-0.185152	0.0168697
ENSG00000111666.6	CHPT1	-0.383382	0.0170454
ENSG00000197381.11	ADARB1	0.177452	0.0170454
ENSG00000130935.5	NOL11	-0.167039	0.0170529
ENSG00000132773.7	TOE1	-0.331532	0.0170733
ENSG00000104946.6	TBC1D17	0.23663	0.0170794
ENSG00000154511.7	FAM69A	-0.619414	0.0170794
ENSG00000184381.14	PLA2G6	0.336413	0.0170794
ENSG00000132423.6	COQ3	-0.352765	0.0170945
ENSG00000100221.6	JOSD1	-0.240975	0.0171375
ENSG00000033327.8	GAB2	0.223726	0.0171512
ENSG00000057252.8	SOAT1	-0.225211	0.0171512
ENSG00000126749.10	EMG1	-0.254852	0.0171512
ENSG00000155755.14	TMEM237	-0.440827	0.0172161
ENSG00000171791.10	BCL2	-0.216176	0.0173536
ENSG00000181163.9	NPM1	-0.24077	0.0174617
ENSG00000143110.7	C1orf162	0.350606	0.0174996
ENSG00000152439.8	ZNF773	0.297178	0.0175934
ENSG00000075856.7	SART3	-0.215923	0.0177072
ENSG00000164620.4	RELL2	0.407499	0.0177437
ENSG00000197933.8	ZNF823	-0.526796	0.017746
ENSG00000082898.12	XPO1	-0.192507	0.0179011
ENSG00000163807.4	KIAA1143	-0.158724	0.0179011
ENSG00000186314.7	PRELID2	-0.35997	0.0179011
ENSG00000186815.8	TPCN1	0.18221	0.0179011
ENSG00000107736.15	CDH23	0.693523	0.0179396
ENSG00000164463.8	CREBRF	0.267917	0.018032
ENSG00000114626.13	ABTB1	0.33427	0.0180361
ENSG00000184619.3	KRBA2	0.851831	0.0182412
ENSG00000049449.4	RCN1	-0.262636	0.0183079
ENSG00000065989.11	PDE4A	-0.351084	0.0183265
ENSG00000104325.2	DECR1	0.16841	0.0184317
ENSG00000129534.9	MIS18BP1	-0.196762	0.0184396
ENSG00000136450.8	SRSF1	-0.186331	0.0185043
ENSG00000070814.13	TCOF1	-0.311955	0.018525
ENSG00000119185.8	ITGB1BP1	-0.21039	0.0186929
ENSG00000164466.8	SFXN1	-0.243934	0.0186929
ENSG00000185238.8	PRMT3	-0.21944	0.0186929
ENSG00000166788.5	SAAL1	-0.318818	0.0187602
ENSG00000001461.12	NIPAL3	0.212245	0.0189049
ENSG00000126453.5	BCL2L12	-0.360143	0.0190361
ENSG00000244509.3	APOBEC3C	0.28325	0.0191018
ENSG00000135378.3	PRRG4	-0.24645	0.0191768
ENSG00000117266.11	CDK18	0.280854	0.0193007
ENSG00000169087.6	HSPBAP1	0.229351	0.0193183
ENSG00000094914.8	AAAS	-0.330874	0.0193489
ENSG00000156931.11	VPS8	0.253267	0.0193489
ENSG00000172115.4	CYCS	-0.208694	0.0193489
ENSG00000172888.7	ZNF621	0.185137	0.0193489
ENSG00000136436.10	CALCOCO2	0.168943	0.0194585
ENSG00000179583.13	CIITA	0.428969	0.0195583
ENSG00000177614.5	PGBD5	-0.566681	0.0195617
ENSG00000134278.10	SPIRE1	-0.247784	0.0195655
ENSG00000074201.4	CLNS1A	-0.192741	0.0196151
ENSG00000004864.9	SLC25A13	-0.19037	0.0196279
ENSG00000163357.6	DCST1	-0.887455	0.0196279
ENSG00000168778.7	TCTN2	-0.33324	0.0196279
ENSG00000081237.14	PTPRC	0.264108	0.0196395
ENSG00000133466.9	C1QTNF6	0.36092	0.0196395
ENSG00000171224.7	C10orf35	0.535425	0.0196395
ENSG00000124766.4	SOX4	0.249738	0.0196521
ENSG00000154727.6	GABPA	-0.207012	0.0196521
ENSG00000181472.4	ZBTB2	-0.248054	0.0196521
ENSG00000101782.10	RIOK3	0.225149	0.0196643
ENSG00000198270.8	TMEM116	0.241144	0.0196823
ENSG00000165140.5	FBP1	0.301639	0.0196844
ENSG00000126561.12	STAT5A	0.22288	0.0198288
ENSG00000100299.13	ARSA	0.213008	0.0198626
ENSG00000184730.6	APOBR	0.387752	0.0202183
ENSG00000108829.9	LRRC59	-0.286407	0.0203536
ENSG00000139531.8	SUOX	0.211919	0.020484
ENSG00000204653.5	ASPDH	0.839025	0.020484
ENSG00000163156.7	SCNM1	0.325256	0.0205127
ENSG00000175309.10	PHYKPL	0.207531	0.0205365
ENSG00000106868.12	SUSD1	0.223201	0.0205935
ENSG00000183248.7	CTD-3193O13.9	0.681016	0.0206353
ENSG00000196189.8	SEMA4A	0.236389	0.0207321
ENSG00000136699.15	SMPD4	-0.350151	0.0207631
ENSG00000188529.10	SRSF10	-0.272231	0.0207631
ENSG00000222009.4	BTBD19	0.607658	0.0207631
ENSG00000050748.13	MAPK9	-0.184252	0.0207852
ENSG00000253320.1	KB-1507C5.2	0.551688	0.0207852
ENSG00000183513.4	COA5	0.21389	0.0208044
ENSG00000124789.7	NUP153	-0.21157	0.020819
ENSG00000003756.12	RBM5	0.13087	0.0209142
ENSG00000188981.6	MSANTD1	0.804695	0.0209444
ENSG00000187954.8	CYHR1	0.244963	0.0210575
ENSG00000162753.10	SLC9C2	1.00722	0.0210925
ENSG00000179409.6	GEMIN4	-0.28988	0.0212096
ENSG00000102098.13	SCML2	-0.267497	0.0212363
ENSG00000163961.4	RNF168	-0.211771	0.0212396
ENSG00000213918.6	DNASE1	0.224873	0.021485
ENSG00000182400.10	TRAPPC6B	0.220012	0.0214886
ENSG00000105281.8	SLC1A5	-0.293914	0.0216043
ENSG00000181035.9	SLC25A42	0.318767	0.0217545
ENSG00000129484.9	PARP2	-0.252742	0.0218875
ENSG00000168291.8	PDHB	0.182372	0.0218875
ENSG00000164713.5	BRI3	0.241223	0.0219672
ENSG00000052795.8	FNIP2	-0.354522	0.0223022
ENSG00000096746.13	HNRNPH3	-0.226258	0.0223566
ENSG00000066583.7	ISOC1	-0.384339	0.0223919
ENSG00000071655.13	MBD3	-0.242731	0.0224058
ENSG00000172748.8	ZNF596	0.431476	0.0224058
ENSG00000138668.14	HNRNPD	-0.165903	0.0224957
ENSG00000065600.8	TMEM206	0.205107	0.0225293
ENSG00000198168.4	SVIP	-0.312512	0.0225293
ENSG00000115687.9	PASK	-0.227099	0.0225311
ENSG00000113742.8	CPEB4	0.262955	0.0227075
ENSG00000168769.8	TET2	0.207848	0.0227601
ENSG00000153885.10	KCTD15	-0.248966	0.0228943
ENSG00000136811.12	ODF2	-0.258347	0.0229626
ENSG00000062822.8	POLD1	-0.336506	0.0230056
ENSG00000092140.10	G2E3	-0.227107	0.0230585
ENSG00000156804.3	FBXO32	0.380627	0.0230888
ENSG00000101811.9	CSTF2	-0.238497	0.0231202
ENSG00000147162.9	OGT	0.191373	0.0231897
ENSG00000187239.12	FNBP1	0.19462	0.0232493
ENSG00000128487.12	SPECC1	0.255593	0.0232528
ENSG00000044090.4	CUL7	0.27347	0.0233229
ENSG00000166704.7	ZNF606	0.26837	0.0233229
ENSG00000161996.13	WDR90	-0.297413	0.0234455
ENSG00000137770.9	CTDSPL2	-0.157818	0.0238078
ENSG00000104081.9	BMF	0.349668	0.0239225
ENSG00000164975.11	SNAPC3	0.192554	0.0241958
ENSG00000197774.8	EME2	0.268548	0.0242186
ENSG00000233280.2	CRYBG3	0.239523	0.0243502
ENSG00000044459.10	CNTLN	-0.302877	0.0245114
ENSG00000198435.2	NRARP	-0.346079	0.0245114
ENSG00000156469.4	MTERFD1	-0.220448	0.0245601
ENSG00000163346.12	PBXIP1	0.270558	0.0246308
ENSG00000179855.5	GIPC3	-0.706779	0.0246367
ENSG00000086475.10	SEPHS1	-0.231993	0.0246992
ENSG00000148248.9	SURF4	-0.296691	0.0246996
ENSG00000172534.9	HCFC1	-0.344183	0.0246996
ENSG00000123329.13	ARHGAP9	0.280825	0.0247623
ENSG00000111653.15	ING4	0.216196	0.0247982
ENSG00000105808.13	RASA4	0.641387	0.024859
ENSG00000155304.4	HSPA13	-0.256089	0.0248802
ENSG00000197056.5	ZMYM1	-0.228743	0.0248919
ENSG00000221821.2	C6orf226	0.455106	0.0250426
ENSG00000101935.5	AMMECR1	-0.200942	0.0251564
ENSG00000172456.12	FGGY	0.280834	0.0251564
ENSG00000176619.6	LMNB2	-0.286041	0.0252214
ENSG00000087338.4	GMCL1	-0.221752	0.0253044
ENSG00000101974.10	ATP11C	-0.265789	0.0255746
ENSG00000090470.10	PDCD7	-0.235393	0.0256078
ENSG00000090581.5	GNPTG	0.230731	0.0256078
ENSG00000119630.9	PGF	0.370201	0.0257115
ENSG00000166348.13	USP54	-0.224629	0.0257365
ENSG00000136710.5	CCDC115	0.250843	0.0257525
ENSG00000214456.4	PLIN5	0.842255	0.0257812
ENSG00000169504.10	CLIC4	-0.238356	0.0258072
ENSG00000107672.10	NSMCE4A	-0.20002	0.0258658
ENSG00000162869.11	PPP1R21	0.187599	0.0258742
ENSG00000120915.9	EPHX2	0.440161	0.025969
ENSG00000022267.12	FHL1	-0.608248	0.0261008
ENSG00000137814.5	HAUS2	-0.214898	0.0263866
ENSG00000139174.6	PRICKLE1	-0.431471	0.0263866
ENSG00000114126.13	TFDP2	-0.268648	0.0264724
ENSG00000168283.9	BMI1	-0.234958	0.0264724
ENSG00000125484.7	GTF3C4	-0.173349	0.0265319
ENSG00000226524.2	RP1-102H19.8	0.627132	0.0266212
ENSG00000117245.8	KIF17	0.376487	0.0266803
ENSG00000100353.13	EIF3D	-0.274458	0.0270907
ENSG00000197363.5	ZNF517	0.301685	0.0270907
ENSG00000154059.5	IMPACT	0.212601	0.0271428
ENSG00000104055.10	TGM5	0.510532	0.0272049
ENSG00000108582.7	CPD	0.178183	0.0272049
ENSG00000156042.13	TTC18	0.690774	0.0272914
ENSG00000145220.9	LYAR	-0.316772	0.02733
ENSG00000103056.7	SMPD3	0.239728	0.0273899
ENSG00000118518.11	RNF146	0.201001	0.0273921
ENSG00000243646.4	IL10RB	0.233523	0.0274012
ENSG00000144580.9	RQCD1	-0.195881	0.0274244
ENSG00000049541.6	RFC2	-0.3351	0.0276464
ENSG00000214787.4	MS4A4E	0.378502	0.027647
ENSG00000147649.5	MTDH	-0.162657	0.0276503
ENSG00000087245.8	MMP2	0.544535	0.027673
ENSG00000136861.13	CDK5RAP2	-0.222376	0.027673
ENSG00000137103.12	TMEM8B	0.379873	0.027673
ENSG00000184162.10	NR2C2AP	-0.367894	0.027673
ENSG00000183077.11	AFMID	0.245581	0.0279895
ENSG00000184702.13	SEPT5	-0.505027	0.0283864
ENSG00000168610.10	STAT3	0.206292	0.0284413
ENSG00000233436.3	BTBD18	0.333655	0.0285068
ENSG00000127481.10	UBR4	0.154156	0.0285532
ENSG00000267680.1	ZNF224	0.327553	0.0285532
ENSG00000090520.6	DNAJB11	-0.217299	0.0285585
ENSG00000204947.4	ZNF425	0.370856	0.0286124
ENSG00000182378.8	PLCXD1	-0.335136	0.0286724
ENSG00000104894.7	CD37	0.287483	0.0288128
ENSG00000135736.5	CCDC102A	-0.347452	0.0288128
ENSG00000026652.9	AGPAT4	0.337654	0.0288463
ENSG00000166147.9	FBN1	-0.381133	0.0288463
ENSG00000160352.11	ZNF714	-0.216883	0.0292859
ENSG00000119318.8	RAD23B	-0.157595	0.0293121
ENSG00000155849.11	ELMO1	0.274417	0.0295361
ENSG00000161542.12	PRPSAP1	-0.197549	0.0295575
ENSG00000103343.8	ZNF174	0.249599	0.0296398
ENSG00000151136.10	BTBD11	0.447673	0.0296818
ENSG00000185379.16	RAD51D	-0.30603	0.0296818
ENSG00000138380.13	CARF	0.297064	0.0297344
ENSG00000062598.13	ELMO2	0.166772	0.029785
ENSG00000047056.10	WDR37	0.171002	0.029804
ENSG00000213420.3	GPC2	0.445793	0.029804
ENSG00000071051.9	NCK2	-0.182993	0.0299337
ENSG00000215009.5	ACSM4	0.475039	0.0301487
ENSG00000009954.6	BAZ1B	-0.202408	0.0305091
ENSG00000085871.4	MGST2	0.197853	0.0305091
ENSG00000012660.9	ELOVL5	-0.157807	0.0305918
ENSG00000170855.3	TRIAP1	0.245818	0.0305918
ENSG00000184260.4	HIST2H2AC	-0.416605	0.0305933
ENSG00000167747.9	C19orf48	-0.355635	0.030625
ENSG00000165916.4	PSMC3	-0.301295	0.0307797
ENSG00000006282.15	SPATA20	0.242894	0.0310057
ENSG00000154146.8	NRGN	-0.416481	0.0310057
ENSG00000167614.9	TTYH1	0.282181	0.0310057
ENSG00000132879.9	FBXO44	0.323519	0.0311119
ENSG00000197905.4	TEAD4	-0.510339	0.031146
ENSG00000158882.8	TOMM40L	-0.224982	0.0311695
ENSG00000099194.5	SCD	-0.3613	0.0312754
ENSG00000100365.10	NCF4	0.285889	0.0312754
ENSG00000147206.12	NXF3	0.241142	0.0313832
ENSG00000104714.9	ERICH1	0.238454	0.0314873
ENSG00000137216.14	TMEM63B	0.219854	0.0314873
ENSG00000162775.10	RBM15	-0.202769	0.0314873
ENSG00000164687.6	FABP5	-0.281676	0.0314873
ENSG00000180871.3	CXCR2	0.344404	0.0314873
ENSG00000182118.5	FAM89A	-0.427742	0.0314873
ENSG00000169891.13	REPS2	0.631239	0.0315458
ENSG00000137642.8	SORL1	0.375431	0.0317911
ENSG00000148187.13	MRRF	-0.206061	0.0318296
ENSG00000100031.14	GGT1	0.313131	0.0319222
ENSG00000115165.5	CYTIP	0.49973	0.0320111
ENSG00000198374.3	HIST1H2AL	-0.739663	0.0320427
ENSG00000138777.15	PPA2	0.148726	0.0322811
ENSG00000028116.12	VRK2	-0.192762	0.0323197
ENSG00000143674.6	MLK4	-0.321485	0.0323197
ENSG00000171206.9	TRIM8	0.181086	0.0323197
ENSG00000083838.11	ZNF446	0.291162	0.0325924
ENSG00000167208.10	SNX20	0.311589	0.0327342
ENSG00000126759.8	CFP	0.521001	0.0327601
ENSG00000005187.7	ACSM3	0.333997	0.0328044
ENSG00000029364.7	SLC39A9	0.121197	0.0328044
ENSG00000036672.11	USP2	-0.338649	0.0328113
ENSG00000169118.11	CSNK1G1	0.15939	0.0329685
ENSG00000135549.10	PKIB	0.39258	0.0330021
ENSG00000145217.9	SLC26A1	0.257647	0.0332167
ENSG00000221968.4	FADS3	0.298259	0.0332861
ENSG00000104419.10	NDRG1	0.184764	0.0335632
ENSG00000103642.7	LACTB	0.24045	0.0335755
ENSG00000179750.11	APOBEC3B	-0.345456	0.0337501
ENSG00000127191.13	TRAF2	-0.223507	0.0337974
ENSG00000128891.11	C15orf57	0.226137	0.0337974
ENSG00000166946.9	CCNDBP1	0.17122	0.0337974
ENSG00000167261.9	DPEP2	0.373382	0.0338335
ENSG00000102699.5	PARP4	0.112589	0.0338846
ENSG00000091436.12	MLTK	-0.147029	0.0339268
ENSG00000015479.13	MATR3	-0.117905	0.0339309
ENSG00000174574.11	AKIRIN1	0.128528	0.0339309
ENSG00000100281.9	HMGXB4	-0.178674	0.0339399
ENSG00000172301.6	COPRS	-0.253107	0.0339399
ENSG00000148730.6	EIF4EBP2	-0.155385	0.0339807
ENSG00000158636.12	C11orf30	-0.174124	0.0340056
ENSG00000134824.9	FADS2	-0.468789	0.0345377
ENSG00000154889.12	MPPE1	0.233134	0.034571
ENSG00000118263.10	KLF7	0.237607	0.0345925
ENSG00000154429.6	CCSAP	-0.175132	0.0345925
ENSG00000174437.12	ATP2A2	-0.121009	0.0347335
ENSG00000168461.8	RAB31	0.323125	0.0348598
ENSG00000165861.9	ZFYVE1	0.217126	0.0348672
ENSG00000068745.10	IP6K2	0.184287	0.0351115
ENSG00000182217.7	HIST2H4B	-0.841158	0.0351115
ENSG00000151650.7	VENTX	0.235997	0.0352507
ENSG00000183773.11	AIFM3	0.282042	0.0352685
ENSG00000170776.15	AKAP13	0.16087	0.0353158
ENSG00000163219.7	ARHGAP25	0.29762	0.0353327
ENSG00000256525.2	POLG2	0.179187	0.0353327
ENSG00000196811.7	CHRNG	0.25903	0.0355555
ENSG00000110660.10	SLC35F2	-0.355326	0.0357318
ENSG00000115993.7	TRAK2	-0.245425	0.0358425
ENSG00000198887.7	SMC5	-0.167216	0.0358425
ENSG00000140749.7	IGSF6	0.642686	0.0360816
ENSG00000135913.6	USP37	-0.168587	0.0365767
ENSG00000064393.11	HIPK2	0.291953	0.036608
ENSG00000179639.6	FCER1A	1.14234	0.0367174
ENSG00000084463.3	WBP11	-0.24618	0.0370671
ENSG00000099901.12	RANBP1	-0.299445	0.037112
ENSG00000139496.11	NUPL1	-0.185486	0.0371301
ENSG00000196605.3	ZNF846	0.388253	0.0373188
ENSG00000167393.12	PPP2R3B	-0.330082	0.0373409
ENSG00000198856.8	OSTC	-0.14138	0.0373409
ENSG00000166130.10	IKBIP	-0.213791	0.0375752
ENSG00000198873.10	GRK5	-0.287343	0.0379092
ENSG00000139436.16	GIT2	0.178193	0.0379215
ENSG00000117758.9	STX12	0.193459	0.038056
ENSG00000167315.13	ACAA2	-0.30953	0.0381278
ENSG00000198556.9	ZNF789	0.189235	0.0381324
ENSG00000113328.14	CCNG1	0.177898	0.0383932
ENSG00000163923.5	RPL39L	-0.418739	0.0383932
ENSG00000183048.7	SLC25A10	-0.315615	0.0383932
ENSG00000170909.9	OSCAR	0.299097	0.038435
ENSG00000155189.7	AGPAT5	-0.128072	0.0385083
ENSG00000133313.10	CNDP2	0.172069	0.0385121
ENSG00000169926.5	KLF13	0.190143	0.0386002
ENSG00000171497.4	PPID	-0.265813	0.0386002
ENSG00000067334.9	DNTTIP2	-0.14983	0.0386607
ENSG00000239665.4	RP11-295P9.3	0.262092	0.0387044
ENSG00000143178.8	TBX19	0.468256	0.0387752
ENSG00000138138.9	ATAD1	0.205823	0.0388458
ENSG00000143390.13	RFX5	0.1694	0.0389402
ENSG00000120437.7	ACAT2	-0.221856	0.0392054
ENSG00000180549.7	FUT7	-0.311414	0.0394077
ENSG00000167702.7	KIFC2	0.271935	0.0395739
ENSG00000149136.3	SSRP1	-0.283725	0.0395821
ENSG00000167207.7	NOD2	0.223806	0.0395835
ENSG00000173480.6	ZNF417	0.197586	0.0398935
ENSG00000167107.8	ACSF2	0.310484	0.0399969
ENSG00000228672.2	PROB1	-0.350945	0.0399969
ENSG00000187187.9	ZNF546	0.278434	0.0400063
ENSG00000085117.7	CD82	0.25866	0.04003
ENSG00000110042.3	DTX4	0.226252	0.0400942
ENSG00000187801.10	ZFP69B	0.314406	0.0401487
ENSG00000152749.7	GPR180	-0.246636	0.0401537
ENSG00000170296.5	GABARAP	0.362622	0.0401746
ENSG00000198700.5	IPO9	-0.184127	0.0401764
ENSG00000166887.11	VPS39	0.143799	0.0402118
ENSG00000085511.15	MAP3K4	-0.162992	0.0402877
ENSG00000100350.10	FOXRED2	-0.270496	0.0402885
ENSG00000137101.8	CD72	0.578226	0.0402885
ENSG00000198176.8	TFDP1	-0.243042	0.0402885
ENSG00000167700.4	MFSD3	0.266826	0.040299
ENSG00000183943.5	PRKX	0.196259	0.0403738
ENSG00000196177.8	ACADSB	0.225357	0.0403738
ENSG00000071626.12	DAZAP1	-0.252352	0.0405452
ENSG00000160299.12	PCNT	-0.216349	0.0407975
ENSG00000167716.14	WDR81	0.261296	0.0408575
ENSG00000043355.6	ZIC2	-0.330155	0.0408865
ENSG00000184117.7	NIPSNAP1	0.215105	0.0408894
ENSG00000175115.7	PACS1	-0.242446	0.0408976
ENSG00000112584.9	FAM120B	0.175538	0.0410304
ENSG00000108423.10	TUBD1	-0.249749	0.0410412
ENSG00000176390.10	CRLF3	0.205873	0.0412206
ENSG00000174227.11	PIGG	0.1977	0.0413346
ENSG00000099783.7	HNRNPM	-0.213518	0.0415282
ENSG00000114784.3	EIF1B	-0.167154	0.0415477
ENSG00000140987.15	ZSCAN32	0.189477	0.0415972
ENSG00000197622.8	CDC42SE1	0.120605	0.0416711
ENSG00000105352.6	CEACAM4	0.398832	0.0416889
ENSG00000108559.7	NUP88	-0.159599	0.0416889
ENSG00000204257.10	HLA-DMA	0.38094	0.0418645
ENSG00000124486.8	USP9X	0.15514	0.0419354
ENSG00000170734.7	POLH	0.277598	0.0419354
ENSG00000244405.3	ETV5	-0.24088	0.0419354
ENSG00000135763.5	URB2	-0.199278	0.0419874
ENSG00000099308.6	MAST3	0.254757	0.0421614
ENSG00000108840.11	HDAC5	0.205994	0.0421842
ENSG00000171877.15	FRMD5	-0.426983	0.0424556
ENSG00000156966.6	B3GNT7	0.293488	0.0424744
ENSG00000107281.5	NPDC1	0.293944	0.0426025
ENSG00000010803.12	SCMH1	-0.220635	0.0428882
ENSG00000103051.14	COG4	0.242284	0.0429719
ENSG00000101336.8	HCK	0.372008	0.0429719
ENSG00000104361.5	NIPAL2	0.186398	0.0429719
ENSG00000109107.9	ALDOC	0.328118	0.0429719
ENSG00000175193.8	PARL	0.162909	0.0429719
ENSG00000143740.10	SNAP47	0.219206	0.043062
ENSG00000123136.10	DDX39A	-0.315858	0.043102
ENSG00000130707.13	ASS1	-0.26144	0.0431785
ENSG00000153560.7	UBP1	-0.107056	0.0431785
ENSG00000189042.9	ZNF567	0.248159	0.0431785
ENSG00000185658.9	BRWD1	0.192543	0.0432993
ENSG00000185800.7	DMWD	0.176415	0.0433562
ENSG00000106070.13	GRB10	-0.276771	0.0434468
ENSG00000124177.10	CHD6	0.153994	0.0434468
ENSG00000134242.11	PTPN22	0.300753	0.0434468
ENSG00000136628.13	EPRS	-0.160752	0.0435679
ENSG00000090376.4	IRAK3	0.133485	0.0436338
ENSG00000148672.7	GLUD1	0.152896	0.043699
ENSG00000005189.15	AC004381.6	-0.228396	0.0437084
ENSG00000112659.9	CUL9	0.181289	0.0437172
ENSG00000122547.6	EEPD1	0.306206	0.0437172
ENSG00000081665.9	ZNF506	0.200678	0.0440859
ENSG00000146858.7	ZC3HAV1L	-0.22173	0.0441246
ENSG00000165416.10	SUGT1	-0.143787	0.0441319
ENSG00000174428.12	GTF2IRD2B	0.408932	0.0441943
ENSG00000176209.7	SMIM19	0.196851	0.0442042
ENSG00000106804.6	C5	0.259213	0.0443412
ENSG00000162783.8	IER5	0.225211	0.0443412
ENSG00000197170.5	PSMD12	-0.165645	0.0443412
ENSG00000105516.6	DBP	0.242395	0.0443751
ENSG00000173230.11	GOLGB1	0.160914	0.0443756
ENSG00000116396.9	KCNC4	-0.368688	0.0444745
ENSG00000035681.3	NSMAF	0.160221	0.0446686
ENSG00000130669.13	PAK4	-0.170695	0.0448016
ENSG00000135119.10	RNFT2	-0.585166	0.0448016
ENSG00000174996.7	KLC2	-0.284606	0.0449803
ENSG00000158373.7	HIST1H2BD	-0.473451	0.0450676
ENSG00000112893.5	MAN2A1	-0.189535	0.0452592
ENSG00000128245.10	YWHAH	-0.239369	0.0456321
ENSG00000136205.12	TNS3	0.193389	0.0456358
ENSG00000175463.7	TBC1D10C	0.446452	0.0459098
ENSG00000081148.11	IMPG2	0.736487	0.0459491
ENSG00000144320.9	KIAA1715	-0.210492	0.0459491
ENSG00000144815.10	NXPE3	0.164305	0.0459491
ENSG00000162804.9	SNED1	0.281878	0.0459793
ENSG00000188177.9	ZC3H6	0.206955	0.0461068
ENSG00000197472.10	ZNF695	-0.636417	0.0467549
ENSG00000184154.8	LRTOMT	0.227787	0.046831
ENSG00000132749.6	MTL5	0.210689	0.0470938
ENSG00000198585.7	NUDT16	0.19163	0.0471267
ENSG00000106617.9	PRKAG2	0.189445	0.0476155
ENSG00000147140.11	NONO	-0.215266	0.0476562
ENSG00000100330.11	MTMR3	0.155489	0.0478553
ENSG00000129675.11	ARHGEF6	0.171934	0.0478553
ENSG00000185875.8	THNSL1	0.252418	0.0478553
ENSG00000165028.7	NIPSNAP3B	0.395691	0.0479247
ENSG00000204536.9	CCHCR1	-0.253181	0.0479798
ENSG00000104972.10	LILRB1	0.30051	0.0481519
ENSG00000114646.5	CSPG5	-0.67629	0.0482499
ENSG00000117984.8	CTSD	0.186548	0.0482499
ENSG00000138439.10	FAM117B	0.158525	0.0482499
ENSG00000213930.7	GALT	0.241385	0.0482499
ENSG00000242419.1	PCDHGC4	0.571983	0.0482499
ENSG00000040199.14	PHLPP2	-0.31248	0.0482854
ENSG00000115866.6	DARS	-0.159089	0.0482854
ENSG00000146463.7	ZMYM4	0.169554	0.0482854
ENSG00000119638.8	NEK9	0.127744	0.0483825
ENSG00000148229.8	POLE3	-0.218481	0.0483825
ENSG00000104756.11	KCTD9	-0.215658	0.0484308
ENSG00000164134.8	NAA15	-0.133891	0.0484308
ENSG00000112473.12	SLC39A7	-0.208398	0.048527
ENSG00000137070.13	IL11RA	0.415472	0.0485408
ENSG00000168234.8	TTC39C	-0.188388	0.0486079
ENSG00000075188.4	NUP37	-0.164349	0.0486527
ENSG00000196072.7	BLOC1S2	0.234177	0.0486527
ENSG00000177989.9	ODF3B	0.25809	0.0488674
ENSG00000187522.9	HSPA14	-0.172499	0.0488674
ENSG00000132603.9	NIP7	-0.178097	0.0489105
ENSG00000176659.5	C20orf197	0.212915	0.0491205
ENSG00000140259.6	MFAP1	-0.206606	0.0493155
ENSG00000157538.9	DSCR3	0.116344	0.0493876
ENSG00000006114.11	SYNRG	0.142491	0.0497122
ENSG00000102317.13	RBM3	0.10429	0.0497122
ENSG00000219626.4	FAM228B	0.339282	0.0497122
ENSG00000126822.11	PLEKHG3	0.190563	0.0497513
ENSG00000181588.15	MEX3D	-0.230225	0.0500401
ENSG00000180573.8	HIST1H2AC	-0.457458	0.0500784
ENSG00000185340.11	GAS2L1	-0.329455	0.0503709
ENSG00000197903.6	HIST1H2BK	-0.363373	0.0503709
ENSG00000198954.4	KIAA1279	-0.255604	0.0505123
ENSG00000114993.11	RTKN	0.321302	0.0505832
ENSG00000198825.7	INPP5F	0.157518	0.0510221
ENSG00000163950.8	SLBP	-0.215677	0.0510268
ENSG00000134285.6	FKBP11	0.224456	0.0511531
ENSG00000047410.9	TPR	-0.159273	0.0512807
ENSG00000077380.11	DYNC1I2	-0.138874	0.0515944
ENSG00000118762.3	PKD2	0.156942	0.0515944
ENSG00000107959.11	PITRM1	0.176031	0.0516269
ENSG00000218672.1	AC008060.7	0.36415	0.051664
ENSG00000132341.7	RAN	-0.171671	0.0519027
ENSG00000130635.11	COL5A1	0.687204	0.0519046
ENSG00000205593.7	DENND6B	0.230969	0.0519775
ENSG00000101306.6	MYLK2	-0.789583	0.0520232
ENSG00000120913.19	PDLIM2	0.223097	0.0521483
ENSG00000089639.6	GMIP	0.247531	0.0522499
ENSG00000123685.4	BATF3	-0.798125	0.0522499
ENSG00000197119.8	SLC25A29	0.182863	0.0522499
ENSG00000213865.3	C8orf44	0.29643	0.0522499
ENSG00000105173.9	CCNE1	-0.221727	0.0522981
ENSG00000122778.5	KIAA1549	-0.485575	0.0524231
ENSG00000166311.5	SMPD1	0.219616	0.0524231
ENSG00000160695.10	VPS11	0.206976	0.0529852
ENSG00000160991.11	ORAI2	0.125307	0.0530791
ENSG00000011304.12	PTBP1	-0.261311	0.0531314
ENSG00000141968.3	VAV1	0.253125	0.0531314
ENSG00000196670.9	ZFP62	0.166924	0.0532509
ENSG00000177058.7	SLC38A9	0.17296	0.053359
ENSG00000156381.4	ANKRD9	-0.289838	0.0534448
ENSG00000124120.6	TTPAL	0.16825	0.053503
ENSG00000175322.7	ZNF519	-0.366338	0.053503
ENSG00000116539.6	ASH1L	0.130452	0.0535133
ENSG00000060971.13	ACAA1	0.23565	0.0538507
ENSG00000140876.7	NUDT7	0.320592	0.0538507
ENSG00000171824.9	EXOSC10	-0.200895	0.0538507
ENSG00000184182.14	UBE2F	0.26822	0.0538507
ENSG00000057019.11	DCBLD2	-0.225573	0.0539195
ENSG00000067955.9	CBFB	-0.13591	0.0539195
ENSG00000149231.7	CCDC82	-0.266252	0.0539195
ENSG00000163516.9	ANKZF1	0.188019	0.0539195
ENSG00000171988.13	JMJD1C	0.181326	0.0539828
ENSG00000204569.5	PPP1R10	0.186205	0.0541389
ENSG00000127022.10	CANX	-0.169707	0.0543477
ENSG00000156374.10	PCGF6	-0.199622	0.0544576
ENSG00000154415.3	PPP1R3A	0.642465	0.0546142
ENSG00000070610.10	GBA2	0.180891	0.0548025
ENSG00000111530.8	CAND1	-0.14701	0.0548025
ENSG00000144381.12	HSPD1	-0.236589	0.0548025
ENSG00000214655.6	ZSWIM8	0.210148	0.0548025
ENSG00000119326.10	CTNNAL1	-0.345967	0.0549175
ENSG00000109534.12	GAR1	-0.216028	0.0550245
ENSG00000110367.7	DDX6	-0.13112	0.0550245
ENSG00000174100.5	MRPL45	-0.181448	0.0551316
ENSG00000197530.8	MIB2	0.256741	0.0551316
ENSG00000160072.15	ATAD3B	-0.28929	0.0553198
ENSG00000184886.3	PIGW	-0.273335	0.055491
ENSG00000135845.5	PIGC	-0.205429	0.0555147
ENSG00000197958.8	RPL12	-0.357137	0.0556821
ENSG00000139645.9	ANKRD52	-0.25372	0.05571
ENSG00000101407.8	TTI1	-0.216199	0.055976
ENSG00000253485.1	PCDHGA5	0.378059	0.055976
ENSG00000107968.5	MAP3K8	0.282859	0.0560413
ENSG00000157303.6	SUSD3	0.219885	0.0560811
ENSG00000167088.6	SNRPD1	-0.231521	0.0561174
ENSG00000183019.3	C19orf59	-0.367028	0.0561174
ENSG00000251192.3	ZNF674	0.388835	0.0561514
ENSG00000154945.6	ANKRD40	-0.235573	0.0561727
ENSG00000158517.9	NCF1	0.429652	0.0564674
ENSG00000196591.7	HDAC2	-0.12007	0.0564699
ENSG00000017427.11	IGF1	0.875254	0.0564815
ENSG00000101605.8	MYOM1	0.580242	0.0564815
ENSG00000143507.13	DUSP10	0.222632	0.0564815
ENSG00000164626.8	KCNK5	-0.325069	0.0564815
ENSG00000180921.6	FAM83H	0.15473	0.0564815
ENSG00000111843.9	TMEM14C	0.15689	0.0566706
ENSG00000006047.8	YBX2	-0.873254	0.0567887
ENSG00000141506.9	PIK3R5	0.28007	0.0567887
ENSG00000117115.8	PADI2	0.547106	0.0569029
ENSG00000131591.13	C1orf159	-0.265678	0.0569567
ENSG00000095303.10	PTGS1	0.302161	0.0570545
ENSG00000135090.9	TAOK3	0.175427	0.0571001
ENSG00000187266.9	EPOR	-0.353357	0.0571311
ENSG00000135334.8	AKIRIN2	-0.195682	0.0572274
ENSG00000136536.10	MARCH7	0.187196	0.0572274
ENSG00000205930.4	C21orf49	0.650898	0.0572274
ENSG00000164758.3	MED30	-0.294071	0.0572322
ENSG00000203832.6	NBPF20	0.40155	0.0572322
ENSG00000065615.9	CYB5R4	0.163288	0.0572673
ENSG00000143751.9	SDE2	-0.157756	0.0572673
ENSG00000188822.6	CNR2	0.8446	0.0572673
ENSG00000173542.4	MOB1B	0.275438	0.0573635
ENSG00000180773.10	SLC36A4	-0.223115	0.057394
ENSG00000197914.2	HIST1H4K	-1.17375	0.057394
ENSG00000034693.10	PEX3	-0.300045	0.0576036
ENSG00000112877.6	CEP72	-0.244408	0.0576036
ENSG00000178852.11	EFCAB13	0.326154	0.0576036
ENSG00000103540.12	CCP110	-0.140405	0.0576675
ENSG00000184990.8	SIVA1	-0.282384	0.0576808
ENSG00000100983.5	GSS	0.162383	0.0577401
ENSG00000186399.8	GOLGA8R	-0.267517	0.0578686
ENSG00000205464.7	ATP6AP1L	0.419907	0.0579551
ENSG00000135018.9	UBQLN1	-0.133996	0.0580907
ENSG00000013523.5	ANGEL1	0.201956	0.0581192
ENSG00000115875.14	SRSF7	-0.168223	0.0584072
ENSG00000128604.14	IRF5	0.207835	0.0584072
ENSG00000157353.12	FUK	0.249228	0.0584072
ENSG00000268852.1	AC132872.2	-0.430539	0.0587059
ENSG00000135404.7	CD63	0.18125	0.0587726
ENSG00000129195.11	FAM64A	-0.395607	0.0588532
ENSG00000163067.10	ZNF2	0.254884	0.0588603
ENSG00000204592.5	HLA-E	0.184807	0.05914
ENSG00000004468.8	CD38	0.259022	0.0592405
ENSG00000119801.8	YPEL5	0.313036	0.0592731
ENSG00000130544.7	ZNF557	0.145517	0.0593331
ENSG00000101213.5	PTK6	0.32508	0.0594131
ENSG00000143466.9	IKBKE	0.158916	0.0594131
ENSG00000126215.9	XRCC3	-0.271727	0.0594714
ENSG00000035115.17	SH3YL1	0.228315	0.0595121
ENSG00000142303.9	ADAMTS10	0.484225	0.0595144
ENSG00000058056.4	USP13	-0.183501	0.0596078
ENSG00000170791.13	CHCHD7	0.165878	0.0596078
ENSG00000172766.14	NAA16	-0.22957	0.0599012
ENSG00000186818.8	LILRB4	0.350898	0.0604049
ENSG00000132912.8	DCTN4	0.145433	0.0606535
ENSG00000074706.9	IPCEF1	0.448595	0.0607126
ENSG00000123146.15	CD97	0.205789	0.06073
ENSG00000124788.13	ATXN1	0.165639	0.06073
ENSG00000162849.11	KIF26B	0.298244	0.06073
ENSG00000167554.10	ZNF610	0.529053	0.06073
ENSG00000186603.4	HPDL	-0.447357	0.06073
ENSG00000250565.2	ATP6V1E2	-0.359125	0.060752
ENSG00000126070.14	AGO3	0.176746	0.060859
ENSG00000116198.8	CEP104	0.13755	0.0609597
ENSG00000221855.1	TAS2R41	0.826905	0.0611563
ENSG00000157734.9	SNX22	-0.408561	0.0613207
ENSG00000196378.7	ZNF34	0.338939	0.0615535
ENSG00000158019.16	BRE	0.194616	0.0617422
ENSG00000066557.5	LRRC40	-0.228312	0.0624078
ENSG00000111725.6	PRKAB1	0.146675	0.0624348
ENSG00000125871.9	MGME1	-0.17546	0.0626359
ENSG00000186862.13	PDZD7	0.269443	0.0626359
ENSG00000213047.7	DENND1B	0.229414	0.06266
ENSG00000090863.7	GLG1	0.158398	0.0627102
ENSG00000172292.10	CERS6	0.14788	0.0627586
ENSG00000102221.9	PHF16	-0.204162	0.0632891
ENSG00000128973.7	CLN6	-0.299296	0.0632891
ENSG00000157796.13	WDR19	0.209184	0.0632891
ENSG00000066427.17	ATXN3	0.176045	0.0634534
ENSG00000090273.9	NUDC	-0.212651	0.0639114
ENSG00000136104.14	RNASEH2B	-0.138508	0.064122
ENSG00000167740.5	CYB5D2	0.224918	0.064122
ENSG00000254087.3	LYN	0.139237	0.064122
ENSG00000179941.6	BBS10	0.291201	0.064305
ENSG00000122034.8	GTF3A	0.243826	0.0643547
ENSG00000271605.1	MILR1	0.341908	0.0647118
ENSG00000121289.13	CEP89	-0.217499	0.064914
ENSG00000249992.1	TMEM158	-0.956255	0.0650136
ENSG00000148308.13	GTF3C5	-0.259266	0.0652055
ENSG00000213240.7	NOTCH2NL	0.338171	0.0652055
ENSG00000001497.12	LAS1L	-0.230171	0.0652386
ENSG00000164118.8	CEP44	-0.215657	0.0652386
ENSG00000108861.4	DUSP3	0.16743	0.0652496
ENSG00000112941.8	PAPD7	-0.269974	0.0653061
ENSG00000164105.3	SAP30	-0.311152	0.0653061
ENSG00000187609.11	EXD3	0.271694	0.0654676
ENSG00000203852.3	HIST2H3A	-0.841825	0.0654678
ENSG00000119242.4	CCDC92	0.259545	0.0655041
ENSG00000047597.5	XK	-0.397029	0.065636
ENSG00000087088.15	BAX	0.311921	0.065636
ENSG00000157045.4	NTAN1	-0.227979	0.065636
ENSG00000187486.5	KCNJ11	-0.841797	0.065636
ENSG00000143067.4	ZNF697	0.234055	0.0656445
ENSG00000155380.7	SLC16A1	-0.192377	0.0656445
ENSG00000164691.12	TAGAP	0.246922	0.0656445
ENSG00000198081.6	ZBTB14	-0.182679	0.0656445
ENSG00000185787.10	MORF4L1	-0.110627	0.0657789
ENSG00000132964.7	CDK8	-0.17829	0.0658032
ENSG00000166340.10	TPP1	0.222095	0.0660322
ENSG00000198663.12	C6orf89	0.123762	0.0660336
ENSG00000053438.7	NNAT	0.354222	0.0664934
ENSG00000064607.12	SUGP2	0.15967	0.0664934
ENSG00000186088.11	GSAP	0.222513	0.0664934
ENSG00000165801.5	ARHGEF40	0.187681	0.0665734
ENSG00000117425.9	PTCH2	0.6735	0.0665785
ENSG00000183323.8	CCDC125	0.192945	0.0665785
ENSG00000256683.2	ZNF350	0.218753	0.0665785
ENSG00000027697.8	IFNGR1	0.206364	0.0666139
ENSG00000173706.8	HEG1	-0.271514	0.0668692
ENSG00000011258.11	MBTD1	0.117089	0.0669012
ENSG00000144677.10	CTDSPL	-0.278891	0.0669893
ENSG00000198815.4	FOXJ3	0.148317	0.0674418
ENSG00000186812.8	ZNF397	0.230879	0.0676413
ENSG00000188559.9	RALGAPA2	0.234364	0.0676413
ENSG00000165115.10	KIF27	0.246754	0.0678513
ENSG00000214078.7	CPNE1	0.196162	0.0678966
ENSG00000013288.4	MAN2B2	0.264637	0.068073
ENSG00000181788.3	SIAH2	-0.237316	0.0681152
ENSG00000185869.9	ZNF829	-0.320199	0.0681152
ENSG00000100439.6	ABHD4	0.386136	0.0683717
ENSG00000197771.8	MCMBP	-0.116733	0.0684135
ENSG00000174405.9	LIG4	0.209308	0.068438
ENSG00000198498.5	TMA16	-0.164356	0.0686425
ENSG00000119812.14	FAM98A	-0.178312	0.068691
ENSG00000162086.10	ZNF75A	0.198814	0.0689954
ENSG00000173548.8	SNX33	0.132342	0.0690153
ENSG00000092108.16	SCFD1	0.208556	0.0691012
ENSG00000105136.15	ZNF419	0.268863	0.0691012
ENSG00000128165.7	ADM2	-0.520045	0.0691012
ENSG00000170266.11	GLB1	0.142737	0.0692282
ENSG00000164329.9	PAPD4	0.152384	0.0692355
ENSG00000133619.13	KRBA1	0.245407	0.0695929
ENSG00000128881.12	TTBK2	0.129916	0.0697378
ENSG00000188321.9	ZNF559	0.285835	0.0697378
ENSG00000144406.14	UNC80	0.549393	0.0698218
ENSG00000164796.13	CSMD3	0.264014	0.0698415
ENSG00000130023.11	ERMARD	0.173045	0.0699823
ENSG00000149177.8	PTPRJ	0.159287	0.070043
ENSG00000184640.13	SEPT9	0.194431	0.0701331
ENSG00000186352.4	ANKRD37	-0.474645	0.0704588
ENSG00000006534.11	ALDH3B1	0.184727	0.0704896
ENSG00000120053.9	GOT1	-0.247532	0.0704896
ENSG00000134574.7	DDB2	0.320557	0.0704896
ENSG00000138398.11	PPIG	-0.184737	0.0704896
ENSG00000142687.13	KIAA0319L	0.139048	0.0704896
ENSG00000185477.4	GPRIN3	-0.813076	0.0704896
ENSG00000198890.6	PRMT6	-0.207183	0.0704896
[truncated: 12,076 more rows]

## Sheet: Mivebresib_vs_DMSO
Feature	Feature_gene_name	log2FoldChange	padj
ENSG00000166123.9	GPT2	-0.839458	1.15885e-47
ENSG00000100448.3	CTSG	-2.27761	2.7233e-45
ENSG00000119547.5	ONECUT2	-1.0794	1.41351e-41
ENSG00000156966.6	B3GNT7	-1.28789	5.5754e-31
ENSG00000161681.11	SHANK1	-0.949242	5.5754e-31
ENSG00000105223.14	PLD3	1.11362	7.01093e-30
ENSG00000043143.16	PHF15	-0.686985	2.34251e-28
ENSG00000132514.9	CLEC10A	-2.33533	3.93142e-27
ENSG00000155974.7	GRIP1	-1.66586	3.93142e-27
ENSG00000198520.6	C1orf228	-1.20184	4.53712e-27
ENSG00000040608.9	RTN4R	-1.87255	9.26493e-27
ENSG00000253293.3	HOXA10	0.688173	1.21512e-25
ENSG00000205592.9	MUC19	-1.26446	7.90245e-25
ENSG00000148154.5	UGCG	-0.471742	2.1916e-24
ENSG00000100099.16	HPS4	-0.7743	2.7958e-23
ENSG00000168685.10	IL7R	-3.32375	3.96841e-23
ENSG00000101307.11	SIRPB1	-0.985584	3.25718e-22
ENSG00000177485.6	ZBTB33	-0.813963	2.01595e-21
ENSG00000015171.14	ZMYND11	-0.62533	3.38869e-21
ENSG00000171791.10	BCL2	-0.697383	3.38869e-21
ENSG00000005381.6	MPO	-1.67083	6.3582e-21
ENSG00000197629.5	MPEG1	-1.50669	7.88558e-20
ENSG00000059804.11	SLC2A3	-1.33958	8.29342e-20
ENSG00000122641.9	INHBA	-2.3013	8.34822e-20
ENSG00000017483.10	SLC38A5	-1.33701	1.37181e-19
ENSG00000104055.10	TGM5	-1.68185	2.26914e-19
ENSG00000122223.8	CD244	-1.81398	2.33949e-19
ENSG00000144218.14	AFF3	-0.945538	2.77751e-19
ENSG00000058668.10	ATP2B4	-0.453441	6.49149e-19
ENSG00000173546.7	CSPG4	-2.8983	6.81984e-19
ENSG00000121807.5	CCR2	-3.03615	8.48458e-19
ENSG00000099998.13	GGT5	-1.71899	8.79087e-19
ENSG00000100427.11	MLC1	-0.926545	3.54573e-18
ENSG00000132912.8	DCTN4	0.513257	3.54573e-18
ENSG00000152056.12	AP1S3	-0.963336	4.53512e-18
ENSG00000115232.9	ITGA4	-0.437042	1.0044e-17
ENSG00000004399.8	PLXND1	-1.07601	1.07343e-17
ENSG00000060558.3	GNA15	-0.71005	7.06845e-17
ENSG00000070081.11	NUCB2	-0.385797	1.24281e-16
ENSG00000128322.6	IGLL1	-5.59766	2.01353e-16
ENSG00000112701.13	SENP6	-0.428559	2.07911e-16
ENSG00000197256.6	KANK2	0.604283	2.39772e-16
ENSG00000157445.10	CACNA2D3	-1.16681	2.74905e-16
ENSG00000105492.11	SIGLEC6	-2.62901	5.30365e-16
ENSG00000198933.5	TBKBP1	-0.682699	9.42192e-16
ENSG00000185127.5	C6orf120	0.524387	1.19526e-15
ENSG00000130449.5	ZSWIM6	0.677317	2.13766e-15
ENSG00000124942.9	AHNAK	-0.505154	4.41791e-15
ENSG00000178726.6	THBD	-0.927828	4.41791e-15
ENSG00000171502.10	COL24A1	-1.03415	1.47897e-14
ENSG00000168675.14	LDLRAD4	-1.20929	1.52104e-14
ENSG00000108001.9	EBF3	-0.93052	1.64598e-14
ENSG00000169660.11	HEXDC	0.54085	1.77342e-14
ENSG00000197694.9	SPTAN1	0.509641	1.82401e-14
ENSG00000178773.10	CPNE7	-1.34036	2.54925e-14
ENSG00000087495.12	PHACTR3	-0.758279	4.42423e-14
ENSG00000182557.3	SPNS3	-0.995031	4.59276e-14
ENSG00000167207.7	NOD2	-0.684098	5.01706e-14
ENSG00000162434.7	JAK1	0.399043	6.83844e-14
ENSG00000046651.10	OFD1	-0.450788	1.17789e-13
ENSG00000079308.12	TNS1	-1.02335	1.3851e-13
ENSG00000127824.9	TUBA4A	-0.967293	2.05855e-13
ENSG00000105810.5	CDK6	-0.39346	3.11805e-13
ENSG00000151650.7	VENTX	-0.699048	3.11805e-13
ENSG00000198848.8	CES1	-0.945364	3.36782e-13
ENSG00000145287.6	PLAC8	-0.849209	4.20145e-13
ENSG00000185518.7	SV2B	-1.74929	5.03804e-13
ENSG00000075240.12	GRAMD4	-0.640452	5.5387e-13
ENSG00000183019.3	C19orf59	-1.15822	5.63799e-13
ENSG00000084710.9	EFR3B	2.29732	5.66642e-13
ENSG00000263264.1	CTB-133G6.1	-0.996574	5.66642e-13
ENSG00000113532.8	ST8SIA4	-0.453388	6.0998e-13
ENSG00000105967.11	TFEC	-0.654297	6.35092e-13
ENSG00000073910.15	FRY	-0.574512	6.58842e-13
ENSG00000158714.6	SLAMF8	-2.9079	6.81723e-13
ENSG00000197142.6	ACSL5	-0.882125	7.15034e-13
ENSG00000256235.1	SMIM3	0.983444	1.18088e-12
ENSG00000134242.11	PTPN22	-0.884492	1.20244e-12
ENSG00000185198.7	PRSS57	-1.1435	2.1943e-12
ENSG00000110042.3	DTX4	-0.627707	2.31251e-12
ENSG00000130590.9	SAMD10	-1.13809	2.31412e-12
ENSG00000203666.8	EFCAB2	-0.578574	2.37464e-12
ENSG00000057252.8	SOAT1	0.538792	2.66498e-12
ENSG00000005249.8	PRKAR2B	1.02918	2.72403e-12
ENSG00000119638.8	NEK9	0.3563	2.74077e-12
ENSG00000069188.12	SDK2	-2.10843	2.90396e-12
ENSG00000111670.10	GNPTAB	0.369642	3.1749e-12
ENSG00000020922.8	MRE11A	0.346758	6.61973e-12
ENSG00000160767.16	FAM189B	-0.761151	6.61973e-12
ENSG00000077984.4	CST7	-2.16984	8.28917e-12
ENSG00000113758.9	DBN1	-0.853087	8.32789e-12
ENSG00000156052.6	GNAQ	-0.588485	8.4598e-12
ENSG00000204472.8	AIF1	-0.998094	8.70933e-12
ENSG00000124151.14	NCOA3	0.521649	9.63175e-12
ENSG00000134986.9	NREP	-0.517244	9.64593e-12
ENSG00000075420.8	FNDC3B	-0.552583	9.74306e-12
ENSG00000254726.2	MEX3A	-1.263	9.86325e-12
ENSG00000186767.5	SPIN4	-0.553822	1.12085e-11
ENSG00000004809.9	SLC22A16	-0.915683	1.23568e-11
ENSG00000100373.5	UPK3A	-1.77997	1.30756e-11
ENSG00000133169.5	BEX1	-1.01486	1.53323e-11
ENSG00000188818.8	ZDHHC11	-0.943599	1.54046e-11
ENSG00000178878.8	APOLD1	0.637211	1.56808e-11
ENSG00000064687.8	ABCA7	0.607443	1.80565e-11
ENSG00000149328.10	GLB1L2	-0.848557	2.26861e-11
ENSG00000164402.9	SEPT8	-0.524144	2.26861e-11
ENSG00000182568.12	SATB1	0.468648	2.35347e-11
ENSG00000184937.8	WT1	-0.862581	3.04596e-11
ENSG00000172349.12	IL16	-0.699525	3.4915e-11
ENSG00000171914.10	TLN2	0.89836	3.7403e-11
ENSG00000144354.9	CDCA7	-0.443922	4.58996e-11
ENSG00000205221.8	VIT	-2.42492	5.06139e-11
ENSG00000119866.16	BCL11A	-1.12797	5.31835e-11
ENSG00000117616.13	C1orf63	0.41981	6.30753e-11
ENSG00000006756.11	ARSD	0.448199	6.64672e-11
ENSG00000070501.7	POLB	0.656829	8.05225e-11
ENSG00000106443.10	PHF14	-0.540115	8.39479e-11
ENSG00000106868.12	SUSD1	-0.524084	8.39479e-11
ENSG00000049239.8	H6PD	0.431451	8.83546e-11
ENSG00000105409.11	ATP1A3	-1.11653	1.1894e-10
ENSG00000147145.8	LPAR4	-1.83087	1.29006e-10
ENSG00000165476.8	REEP3	-0.516713	1.35729e-10
ENSG00000117245.8	KIF17	-0.950696	1.37486e-10
ENSG00000104783.7	KCNN4	-1.01333	1.57849e-10
ENSG00000166428.8	PLD4	-0.79092	1.78185e-10
ENSG00000096996.11	IL12RB1	-0.832378	1.89631e-10
ENSG00000115839.13	RAB3GAP1	0.452807	1.89631e-10
ENSG00000153885.10	KCTD15	-0.581404	1.91772e-10
ENSG00000186834.2	HEXIM1	0.52893	2.27672e-10
ENSG00000249437.3	NAIP	-0.997957	2.68092e-10
ENSG00000005893.11	LAMP2	0.440623	2.73716e-10
ENSG00000134627.7	PIWIL4	-0.342469	4.07581e-10
ENSG00000136960.8	ENPP2	-1.26052	4.19029e-10
ENSG00000152104.7	PTPN14	-0.67253	4.8485e-10
ENSG00000136732.10	GYPC	-1.819	5.09769e-10
ENSG00000185697.12	MYBL1	0.635016	5.44138e-10
ENSG00000122859.4	NEUROG3	-0.902944	5.50299e-10
ENSG00000109756.4	RAPGEF2	0.49347	6.24659e-10
ENSG00000177119.11	ANO6	0.381584	6.36454e-10
ENSG00000104814.8	MAP4K1	-1.05745	6.43194e-10
ENSG00000166927.8	MS4A7	-0.660646	6.50896e-10
ENSG00000152580.8	IGSF10	-1.38085	7.15994e-10
ENSG00000175711.4	B3GNTL1	-0.488925	7.34994e-10
ENSG00000164066.8	INTU	-0.67776	7.94713e-10
ENSG00000198720.8	ANKRD13B	-0.882775	8.04963e-10
ENSG00000198879.7	SFMBT2	-0.446183	8.04963e-10
ENSG00000155592.11	ZKSCAN2	0.601978	1.07277e-09
ENSG00000197746.9	PSAP	0.573362	1.57036e-09
ENSG00000167930.11	ITFG3	0.572473	1.6899e-09
ENSG00000120913.19	PDLIM2	-0.569796	1.70054e-09
ENSG00000034713.3	GABARAPL2	0.384525	1.70165e-09
ENSG00000167851.9	CD300A	-1.05969	1.80002e-09
ENSG00000175591.7	P2RY2	-0.828494	2.08473e-09
ENSG00000087053.14	MTMR2	-0.413733	2.16542e-09
ENSG00000132334.12	PTPRE	-0.554636	2.66574e-09
ENSG00000185760.11	KCNQ5	-0.863478	2.72875e-09
ENSG00000138821.8	SLC39A8	-0.37571	2.89613e-09
ENSG00000148019.8	CEP78	0.385926	2.94386e-09
ENSG00000157227.8	MMP14	-0.354111	4.00112e-09
ENSG00000060982.10	BCAT1	-0.530554	4.17918e-09
ENSG00000133317.10	LGALS12	-1.14184	4.56013e-09
ENSG00000169397.3	RNASE3	-1.34913	4.68724e-09
ENSG00000005379.11	BZRAP1	-0.598086	4.79684e-09
ENSG00000211455.3	STK38L	0.63712	5.47556e-09
ENSG00000109323.4	MANBA	0.378528	6.0007e-09
ENSG00000184156.11	KCNQ3	-1.71421	6.0007e-09
ENSG00000129951.14	LPPR3	-0.696219	6.02424e-09
ENSG00000104728.11	ARHGEF10	-0.70852	6.10473e-09
ENSG00000136010.9	ALDH1L2	-0.821621	6.10473e-09
ENSG00000155115.6	GTF3C6	-0.438922	7.19005e-09
ENSG00000254087.3	LYN	0.343888	7.44482e-09
ENSG00000185818.7	NAT8L	-0.657792	7.44795e-09
ENSG00000134594.4	RAB33A	-0.6612	7.5528e-09
ENSG00000171794.3	UTF1	-1.60011	7.62195e-09
ENSG00000204482.6	LST1	-0.886254	8.45098e-09
ENSG00000204634.8	TBC1D8	0.405648	8.58725e-09
ENSG00000121064.8	SCPEP1	0.440763	9.79822e-09
ENSG00000115457.5	IGFBP2	-0.429722	1.02652e-08
ENSG00000122484.8	RPAP2	0.430921	1.06564e-08
ENSG00000130518.12	KIAA1683	0.838101	1.10333e-08
ENSG00000069482.6	GAL	-1.40411	1.13616e-08
ENSG00000072210.14	ALDH3A2	0.518472	1.14365e-08
ENSG00000143924.14	EML4	0.285434	1.15725e-08
ENSG00000110665.7	C11orf21	-0.668186	1.15891e-08
ENSG00000114686.4	MRPL3	-0.468766	1.18419e-08
ENSG00000005961.13	ITGA2B	-1.12297	1.18648e-08
ENSG00000063438.12	AHRR	-0.771166	1.54662e-08
ENSG00000130707.13	ASS1	-0.59688	1.54823e-08
ENSG00000160200.13	CBS	-0.91409	1.54823e-08
ENSG00000171509.11	RXFP1	-1.55721	1.54823e-08
ENSG00000173621.8	LRFN4	-0.637713	1.55047e-08
ENSG00000126259.15	KIRREL2	-0.853381	1.64586e-08
ENSG00000256229.3	ZNF486	-0.727252	1.64603e-08
ENSG00000160447.6	PKN3	-0.628341	1.64991e-08
ENSG00000160593.13	AMICA1	-1.27116	1.64993e-08
ENSG00000166501.8	PRKCB	0.440575	1.86976e-08
ENSG00000137474.15	MYO7A	-1.05529	1.89934e-08
ENSG00000033327.8	GAB2	-0.45371	1.90116e-08
ENSG00000197019.4	SERTAD1	0.626936	1.90116e-08
ENSG00000136854.13	STXBP1	0.507101	2.22074e-08
ENSG00000242732.3	RGAG4	0.693062	2.22641e-08
ENSG00000084110.6	HAL	-1.15471	2.41968e-08
ENSG00000179598.5	PLD6	-0.639188	2.41968e-08
ENSG00000184575.7	XPOT	-0.351845	2.47216e-08
ENSG00000158473.6	CD1D	0.65637	2.51942e-08
ENSG00000143493.8	INTS7	0.366223	2.64418e-08
ENSG00000104419.10	NDRG1	0.396498	3.13772e-08
ENSG00000099330.4	OCEL1	0.606872	3.16392e-08
ENSG00000135677.6	GNS	0.333415	3.18217e-08
ENSG00000086015.16	MAST2	0.487412	3.28985e-08
ENSG00000095970.12	TREM2	-1.18824	3.29558e-08
ENSG00000114933.11	INO80D	-0.323835	3.35095e-08
ENSG00000196209.8	SIRPB2	-1.04393	3.43104e-08
ENSG00000197283.8	SYNGAP1	-0.519771	3.93253e-08
ENSG00000100596.2	SPTLC2	-0.234983	4.12742e-08
ENSG00000124780.9	KCNK17	-2.5733	4.40031e-08
ENSG00000148158.12	SNX30	-0.363318	4.55068e-08
ENSG00000188042.5	ARL4C	-1.06481	4.58283e-08
ENSG00000163975.7	MFI2	-0.558485	4.7841e-08
ENSG00000167815.7	PRDX2	-0.655074	5.09975e-08
ENSG00000154359.8	LONRF1	-0.424349	5.25188e-08
ENSG00000143870.8	PDIA6	-0.402935	5.49678e-08
ENSG00000170791.13	CHCHD7	0.381522	5.69708e-08
ENSG00000197461.9	PDGFA	-1.359	5.69708e-08
ENSG00000181908.4	AP003774.4	-0.920915	5.77684e-08
ENSG00000122707.7	RECK	0.594815	5.82937e-08
ENSG00000133816.9	MICAL2	-0.47126	6.09214e-08
ENSG00000101188.4	NTSR1	-0.934322	7.33942e-08
ENSG00000008294.16	SPAG9	0.262507	7.67841e-08
ENSG00000174842.12	GLMN	0.586156	8.16477e-08
ENSG00000180549.7	FUT7	-0.671721	8.45275e-08
ENSG00000137101.8	CD72	-1.38796	8.68966e-08
ENSG00000170325.10	PRDM10	-0.482565	9.29339e-08
ENSG00000142197.8	DOPEY2	0.358934	9.625e-08
ENSG00000133104.8	SPG20	-0.259869	1.22138e-07
ENSG00000169896.12	ITGAM	0.81104	1.25582e-07
ENSG00000122068.8	FYTTD1	0.353263	1.35592e-07
ENSG00000136161.8	RCBTB2	0.502697	1.36578e-07
ENSG00000167202.7	TBC1D2B	-0.351024	1.42927e-07
ENSG00000171757.11	LRRC34	-0.766752	1.44521e-07
ENSG00000133704.5	IPO8	-0.355276	1.50212e-07
ENSG00000019102.7	VSIG2	0.713184	1.50547e-07
ENSG00000196428.8	TSC22D2	0.3987	1.51726e-07
ENSG00000198815.4	FOXJ3	-0.34138	1.65308e-07
ENSG00000130294.10	KIF1A	-1.97598	1.7788e-07
ENSG00000064201.11	TSPAN32	-0.501973	2.16079e-07
ENSG00000144401.10	METTL21A	-0.367164	2.16079e-07
ENSG00000164604.8	GPR85	-0.701503	2.16079e-07
ENSG00000145569.5	FAM105A	-0.433531	2.17956e-07
ENSG00000085449.10	WDFY1	-0.408282	2.23856e-07
ENSG00000128578.5	STRIP2	0.479281	2.23856e-07
ENSG00000198408.9	MGEA5	0.367184	2.23856e-07
ENSG00000110881.7	ASIC1	-0.813718	2.2416e-07
ENSG00000157388.9	CACNA1D	-1.40319	2.37984e-07
ENSG00000154027.14	AK5	-1.12825	2.65194e-07
ENSG00000167103.7	PIP5KL1	0.746591	2.74744e-07
ENSG00000153395.5	LPCAT1	-0.433777	2.79703e-07
ENSG00000084234.12	APLP2	0.289938	2.81843e-07
ENSG00000184730.6	APOBR	-0.748708	2.87075e-07
ENSG00000130592.9	LSP1	-0.898377	2.92078e-07
ENSG00000135776.4	ABCB10	-0.508325	2.96988e-07
ENSG00000227268.3	KLLN	-0.664416	3.0158e-07
ENSG00000129675.11	ARHGEF6	-0.365741	3.27938e-07
ENSG00000068831.14	RASGRP2	-0.563503	3.39645e-07
ENSG00000117289.7	TXNIP	0.749288	3.51898e-07
ENSG00000184254.12	ALDH1A3	0.642568	3.51898e-07
ENSG00000166295.4	ANAPC16	0.393276	3.62736e-07
ENSG00000101040.15	ZMYND8	-0.316128	3.77648e-07
ENSG00000107890.12	ANKRD26	0.427035	3.84874e-07
ENSG00000104970.6	KIR3DX1	-1.21311	4.17291e-07
ENSG00000074706.9	IPCEF1	-1.03942	4.52516e-07
ENSG00000112276.9	BVES	0.841407	4.52516e-07
ENSG00000135900.3	MRPL44	-0.413299	4.60055e-07
ENSG00000105374.5	NKG7	-1.15899	4.65943e-07
ENSG00000086475.10	SEPHS1	-0.44202	5.33492e-07
ENSG00000143819.8	EPHX1	0.483408	5.73414e-07
ENSG00000156239.7	N6AMT1	0.533052	6.25089e-07
ENSG00000166432.10	ZMAT1	0.7613	6.25089e-07
ENSG00000110925.2	CSRNP2	0.389904	6.25112e-07
ENSG00000149428.14	HYOU1	-0.49214	6.27565e-07
ENSG00000196305.13	IARS	-0.334439	6.40531e-07
ENSG00000162378.8	ZYG11B	0.471594	6.44815e-07
ENSG00000104687.8	GSR	0.323383	7.22968e-07
ENSG00000185920.11	PTCH1	-0.877013	7.83014e-07
ENSG00000007264.9	MATK	-0.800117	7.96287e-07
ENSG00000062524.11	LTK	-0.996424	8.09642e-07
ENSG00000076641.4	PAG1	0.356618	8.09642e-07
ENSG00000172322.9	CLEC12A	-2.0687	8.09642e-07
ENSG00000203392.2	AC105020.1	-1.56115	8.30792e-07
ENSG00000050438.12	SLC4A8	0.850341	8.49411e-07
ENSG00000204366.3	ZBTB12	-0.506658	8.57106e-07
ENSG00000100344.6	PNPLA3	-0.506737	9.14708e-07
ENSG00000188177.9	ZC3H6	0.417248	9.56854e-07
ENSG00000092445.7	TYRO3	-0.994943	9.62296e-07
ENSG00000184675.5	AMER1	-0.549693	9.8916e-07
ENSG00000120437.7	ACAT2	-0.439294	1.13813e-06
ENSG00000186810.7	CXCR3	-1.36941	1.15883e-06
ENSG00000014257.11	ACPP	-0.568876	1.18294e-06
ENSG00000113070.6	HBEGF	0.609353	1.19903e-06
ENSG00000145362.12	ANK2	-1.67165	1.20087e-06
ENSG00000164877.14	MICALL2	0.441154	1.21371e-06
ENSG00000152377.8	SPOCK1	-0.870641	1.27057e-06
ENSG00000113742.8	CPEB4	0.478101	1.27477e-06
ENSG00000070371.11	CLTCL1	-0.341242	1.27721e-06
ENSG00000113494.12	PRLR	-2.7642	1.27721e-06
ENSG00000133121.16	STARD13	-1.01011	1.29207e-06
ENSG00000171163.11	ZNF692	-0.430578	1.31118e-06
ENSG00000196126.6	HLA-DRB1	-0.627873	1.35212e-06
ENSG00000120063.5	GNA13	-0.264259	1.38084e-06
ENSG00000166341.6	DCHS1	-0.899973	1.4113e-06
ENSG00000198663.12	C6orf89	0.262353	1.43626e-06
ENSG00000131650.9	KREMEN2	-0.881587	1.4522e-06
ENSG00000138604.5	GLCE	0.41698	1.52083e-06
ENSG00000127022.10	CANX	-0.347878	1.55455e-06
ENSG00000159674.7	SPON2	-0.64822	1.56643e-06
ENSG00000164292.8	RHOBTB3	0.47611	1.6429e-06
ENSG00000158882.8	TOMM40L	-0.429592	1.67966e-06
ENSG00000140678.12	ITGAX	0.630013	1.71052e-06
ENSG00000123411.10	IKZF4	-0.650442	1.75567e-06
ENSG00000106804.6	C5	0.510616	1.78318e-06
ENSG00000094916.9	CBX5	0.418801	1.80274e-06
ENSG00000107104.14	KANK1	-0.57789	1.87223e-06
ENSG00000004700.11	RECQL	0.28996	1.92812e-06
ENSG00000160791.12	CCR5	-1.96494	1.93455e-06
ENSG00000078399.11	HOXA9	0.321246	2.02662e-06
ENSG00000108292.12	MLLT6	-0.26254	2.02662e-06
ENSG00000164111.10	ANXA5	0.433533	2.06651e-06
ENSG00000070915.5	SLC12A3	-0.851585	2.07669e-06
ENSG00000099958.10	DERL3	-0.614821	2.09128e-06
ENSG00000184588.13	PDE4B	-1.4652	2.10133e-06
ENSG00000174885.8	NLRP6	-0.593959	2.20032e-06
ENSG00000106327.8	TFR2	-0.638093	2.21275e-06
ENSG00000106785.10	TRIM14	-0.380277	2.25561e-06
ENSG00000175662.13	TOM1L2	0.344894	2.44086e-06
ENSG00000110090.8	CPT1A	-0.430177	2.48195e-06
ENSG00000114841.13	DNAH1	0.388305	2.6497e-06
ENSG00000135541.16	AHI1	0.345248	2.77326e-06
ENSG00000125124.7	BBS2	0.306335	2.95372e-06
ENSG00000169750.4	RAC3	-0.845911	2.99617e-06
ENSG00000065989.11	PDE4A	-0.611964	3.13183e-06
ENSG00000118503.10	TNFAIP3	-0.36267	3.25037e-06
ENSG00000196663.11	TECPR2	0.324497	3.36098e-06
ENSG00000111790.9	FGFR1OP2	0.334972	3.37156e-06
ENSG00000137575.7	SDCBP	0.417166	3.42865e-06
ENSG00000182759.3	MAFA	1.96553	3.51369e-06
ENSG00000166401.9	SERPINB8	-0.353949	3.58226e-06
ENSG00000214787.4	MS4A4E	-0.700272	3.6067e-06
ENSG00000089177.13	KIF16B	-0.509484	3.63976e-06
ENSG00000224940.4	PRRT4	-1.11413	3.66726e-06
ENSG00000177732.6	SOX12	-0.594933	3.67831e-06
ENSG00000171724.2	VAT1L	-0.994188	3.70836e-06
ENSG00000106484.10	MEST	-0.516954	3.72377e-06
ENSG00000134313.10	KIDINS220	0.310983	3.90178e-06
ENSG00000244165.1	P2RY11	-0.559931	3.92144e-06
ENSG00000124357.8	NAGK	0.618313	4.5317e-06
ENSG00000141424.8	SLC39A6	-0.27448	4.54617e-06
ENSG00000116574.4	RHOU	-0.369914	4.60905e-06
ENSG00000112195.8	TREML2	-1.25152	4.66029e-06
ENSG00000172828.8	CES3	-0.818389	4.707e-06
ENSG00000162723.5	SLAMF9	-1.69941	4.75398e-06
ENSG00000197696.5	NMB	-0.597712	4.86071e-06
ENSG00000152620.8	NADK2	-0.35016	5.1024e-06
ENSG00000158158.7	CNNM4	0.376349	5.21884e-06
ENSG00000181830.7	SLC35C1	-0.452738	5.22411e-06
ENSG00000197043.9	ANXA6	-0.546175	5.50151e-06
ENSG00000170004.12	CHD3	-0.331453	5.50486e-06
ENSG00000196371.2	FUT4	-0.389426	5.54666e-06
ENSG00000178199.9	ZC3H12D	-0.697707	5.59815e-06
ENSG00000185252.13	ZNF74	-0.406477	5.71954e-06
ENSG00000170581.9	STAT2	0.345136	5.87886e-06
ENSG00000035681.3	NSMAF	-0.304051	6.02084e-06
ENSG00000116005.7	PCYOX1	0.239173	6.06101e-06
ENSG00000135744.7	AGT	-0.915456	6.15007e-06
ENSG00000153575.6	TUBGCP5	0.297234	6.24285e-06
ENSG00000178764.6	ZHX2	-0.49222	6.31112e-06
ENSG00000133619.13	KRBA1	-0.508661	6.32512e-06
ENSG00000117151.8	CTBS	0.442236	6.42641e-06
ENSG00000183307.3	CECR6	-0.462135	6.448e-06
ENSG00000070759.12	TESK2	0.488147	6.84193e-06
ENSG00000117407.12	ARTN	0.685622	7.21511e-06
ENSG00000198399.10	ITSN2	0.250297	7.33909e-06
ENSG00000157426.9	AASDH	0.396659	7.43098e-06
ENSG00000166598.8	HSP90B1	-0.309032	7.62533e-06
ENSG00000083720.8	OXCT1	-0.307607	8.08123e-06
ENSG00000073921.13	PICALM	0.268204	8.28847e-06
ENSG00000125354.18	SEPT6	-0.485423	8.34705e-06
ENSG00000196411.5	EPHB4	0.425692	8.55178e-06
ENSG00000187554.7	TLR5	0.887472	8.59378e-06
ENSG00000197343.6	ZNF655	0.303474	8.65712e-06
ENSG00000169413.2	RNASE6	-0.846632	8.7069e-06
ENSG00000104951.11	IL4I1	-0.853758	8.83205e-06
ENSG00000074416.9	MGLL	-0.606591	8.94444e-06
ENSG00000132600.12	PRMT7	-0.514534	8.94444e-06
ENSG00000182218.5	HHIPL1	-0.643687	8.94444e-06
ENSG00000136104.14	RNASEH2B	-0.27428	9.02193e-06
ENSG00000122591.7	FAM126A	0.405412	9.03666e-06
ENSG00000127419.12	TMEM175	0.536916	9.07148e-06
ENSG00000103257.4	SLC7A5	-0.609361	9.46504e-06
ENSG00000196739.10	COL27A1	-0.697788	9.75255e-06
ENSG00000172000.3	ZNF556	-1.19598	9.96959e-06
ENSG00000013364.14	MVP	0.401485	1.01672e-05
ENSG00000107036.7	KIAA1432	0.268137	1.02097e-05
ENSG00000106123.7	EPHB6	-0.506922	1.04347e-05
ENSG00000163964.9	PIGX	0.351263	1.04347e-05
ENSG00000196187.7	TMEM63A	0.299793	1.05624e-05
ENSG00000251322.3	SHANK3	-0.679263	1.05919e-05
ENSG00000100599.11	RIN3	-0.406723	1.07069e-05
ENSG00000134256.8	CD101	-1.11592	1.07227e-05
ENSG00000145214.9	DGKQ	0.355662	1.07227e-05
ENSG00000204856.7	FAM216A	-0.586564	1.07227e-05
ENSG00000244405.3	ETV5	0.429394	1.08267e-05
ENSG00000197965.7	MPZL1	-0.447718	1.09592e-05
ENSG00000164509.9	IL31RA	-1.17306	1.10794e-05
ENSG00000075790.6	BCAP29	0.53427	1.16329e-05
ENSG00000123104.7	ITPR2	0.324349	1.18306e-05
ENSG00000059573.4	ALDH18A1	-0.346603	1.24362e-05
ENSG00000178996.8	SNX18	0.324262	1.24945e-05
ENSG00000129667.8	RHBDF2	0.317391	1.25217e-05
ENSG00000166313.14	APBB1	-0.463464	1.27692e-05
ENSG00000140450.7	ARRDC4	0.655882	1.3023e-05
ENSG00000110080.14	ST3GAL4	-0.690592	1.36033e-05
ENSG00000182578.9	CSF1R	-0.356316	1.36388e-05
ENSG00000135678.7	CPM	0.349295	1.36822e-05
ENSG00000196505.6	GDAP2	0.315443	1.40592e-05
ENSG00000230453.5	ANKRD18B	-0.546495	1.43504e-05
ENSG00000134769.17	DTNA	0.326748	1.4385e-05
ENSG00000005108.11	THSD7A	-0.877766	1.44242e-05
ENSG00000183688.4	FAM101B	-0.355137	1.44242e-05
ENSG00000171574.13	ZNF584	-0.417784	1.59178e-05
ENSG00000099364.12	FBXL19	-0.474868	1.65868e-05
ENSG00000157557.7	ETS2	-0.411341	1.86667e-05
ENSG00000213047.7	DENND1B	-0.44016	1.87306e-05
ENSG00000135828.7	RNASEL	0.342679	1.88448e-05
ENSG00000188641.8	DPYD	0.346522	1.88761e-05
ENSG00000134802.13	SLC43A3	-0.408923	1.88976e-05
ENSG00000124067.12	SLC12A4	0.37652	1.92631e-05
ENSG00000104375.11	STK3	0.409181	1.9295e-05
ENSG00000104998.2	IL27RA	-0.651402	1.93775e-05
ENSG00000140931.15	CMTM3	-0.401739	1.95205e-05
ENSG00000197971.10	MBP	-0.263967	1.97166e-05
ENSG00000141971.8	MVB12A	-0.535385	1.97563e-05
ENSG00000170801.5	HTRA3	-0.955503	2.04419e-05
ENSG00000196189.8	SEMA4A	-0.385353	2.11174e-05
ENSG00000130826.11	DKC1	-0.308726	2.11766e-05
ENSG00000109906.9	ZBTB16	-0.700562	2.22524e-05
ENSG00000121957.8	GPSM2	0.321926	2.35088e-05
ENSG00000259517.1	RP11-324D17.1	-0.688892	2.35418e-05
ENSG00000167703.10	SLC43A2	0.432554	2.37597e-05
ENSG00000168610.10	STAT3	0.344682	2.37597e-05
ENSG00000179583.13	CIITA	-0.695197	2.37597e-05
ENSG00000167895.10	TMC8	-0.589953	2.37944e-05
ENSG00000132694.14	ARHGEF11	0.405218	2.46244e-05
ENSG00000161944.12	ASGR2	-0.947262	2.50699e-05
ENSG00000173272.9	MZT2A	-0.724606	2.50699e-05
ENSG00000182923.12	CEP63	0.304655	2.54037e-05
ENSG00000197892.8	KIF13B	0.447948	2.659e-05
ENSG00000161217.7	PCYT1A	0.247471	2.68554e-05
ENSG00000168538.11	TRAPPC11	0.260329	2.84511e-05
ENSG00000125648.10	SLC25A23	-0.41786	2.85612e-05
ENSG00000108773.6	KAT2A	-0.479069	2.89749e-05
ENSG00000173511.5	VEGFB	-0.52403	2.92811e-05
ENSG00000140526.12	ABHD2	0.272201	2.9578e-05
ENSG00000166025.13	AMOTL1	0.365465	2.9578e-05
ENSG00000186918.9	ZNF395	-0.464085	2.96429e-05
ENSG00000186088.11	GSAP	-0.438867	2.96914e-05
ENSG00000143222.7	UFC1	-0.308736	3.04441e-05
ENSG00000100290.2	BIK	-0.576479	3.08826e-05
ENSG00000146858.7	ZC3HAV1L	-0.393426	3.10044e-05
ENSG00000051825.10	MPHOSPH9	0.287719	3.16835e-05
ENSG00000184635.9	ZNF93	-0.514889	3.16835e-05
ENSG00000125966.8	MMP24	0.421461	3.20235e-05
ENSG00000164938.9	TP53INP1	0.422929	3.23402e-05
ENSG00000079462.3	PAFAH1B3	-0.532765	3.2998e-05
ENSG00000173852.9	DPY19L1	0.402631	3.35957e-05
ENSG00000112343.8	TRIM38	0.390648	3.38143e-05
ENSG00000169710.6	FASN	-0.597804	3.44275e-05
ENSG00000164010.9	ERMAP	0.372989	3.44661e-05
ENSG00000101210.6	EEF1A2	-0.954053	3.48413e-05
ENSG00000134824.9	FADS2	-0.789747	3.61892e-05
ENSG00000122026.6	RPL21	-0.298001	3.73835e-05
ENSG00000187688.10	TRPV2	-0.502631	3.85455e-05
ENSG00000081760.12	AACS	0.289828	3.85964e-05
ENSG00000140992.14	PDPK1	0.27056	3.89753e-05
ENSG00000168421.8	RHOH	-0.968663	3.89753e-05
ENSG00000163393.8	SLC22A15	-0.26956	3.9432e-05
ENSG00000235568.2	NFAM1	-0.46394	3.95311e-05
ENSG00000131400.3	NAPSA	0.684949	4.00944e-05
ENSG00000151876.8	FBXO4	-0.381082	4.0216e-05
ENSG00000173641.13	HSPB7	-1.49639	4.04068e-05
ENSG00000157796.13	WDR19	0.382607	4.13897e-05
ENSG00000169385.2	RNASE2	-0.99268	4.14484e-05
ENSG00000173681.12	CXorf23	0.434578	4.18187e-05
ENSG00000114631.10	PODXL2	-0.70725	4.21928e-05
ENSG00000167799.5	NUDT8	-0.811498	4.22475e-05
ENSG00000054523.12	KIF1B	0.409054	4.32336e-05
ENSG00000173597.4	SULT1B1	-1.106	4.37429e-05
ENSG00000039319.12	ZFYVE16	0.593372	4.39807e-05
ENSG00000271605.1	MILR1	-0.655633	4.40325e-05
ENSG00000018699.7	TTC27	-0.373578	4.43612e-05
ENSG00000142188.12	TMEM50B	0.344274	4.61983e-05
ENSG00000034053.10	APBA2	-0.779338	4.69755e-05
ENSG00000185507.15	IRF7	0.447371	4.80473e-05
ENSG00000150961.10	SEC24D	-0.29623	4.97662e-05
ENSG00000138028.10	CGREF1	-0.583551	5.01691e-05
ENSG00000071246.6	VASH1	0.31025	5.02957e-05
ENSG00000074657.9	ZNF532	-0.599878	5.02957e-05
ENSG00000066230.6	SLC9A3	0.81514	5.1239e-05
ENSG00000100433.11	KCNK10	-0.583375	5.16561e-05
ENSG00000171522.5	PTGER4	-0.424171	5.16561e-05
ENSG00000117411.12	B4GALT2	-0.560319	5.33397e-05
ENSG00000165424.6	ZCCHC24	0.348739	5.34212e-05
ENSG00000151461.15	UPF2	-0.284266	5.35701e-05
ENSG00000154102.6	C16orf74	-0.608081	5.40137e-05
ENSG00000070961.10	ATP2B1	0.307631	5.49334e-05
ENSG00000147155.6	EBP	-0.479759	5.66158e-05
ENSG00000111196.5	MAGOHB	-0.336122	5.78968e-05
ENSG00000141569.6	TRIM65	-0.414759	5.81428e-05
ENSG00000163590.9	PPM1L	0.377672	5.85985e-05
ENSG00000011422.7	PLAUR	-0.336444	5.91727e-05
ENSG00000185201.12	IFITM2	-0.719456	6.00115e-05
ENSG00000174004.5	NRROS	-0.701913	6.0136e-05
ENSG00000178425.9	NT5DC1	0.472484	6.0679e-05
ENSG00000231389.3	HLA-DPA1	-1.0506	6.0679e-05
ENSG00000184922.9	FMNL1	-0.540196	6.08715e-05
ENSG00000033627.10	ATP6V0A1	0.391412	6.11273e-05
ENSG00000155849.11	ELMO1	-0.445752	6.11273e-05
ENSG00000103657.9	HERC1	0.240714	6.13492e-05
ENSG00000163803.8	PLB1	-0.565769	6.13492e-05
ENSG00000203879.7	GDI1	0.328574	6.13492e-05
ENSG00000156127.6	BATF	-0.517036	6.31021e-05
ENSG00000148218.11	ALAD	0.315047	6.38887e-05
ENSG00000167004.8	PDIA3	-0.207165	6.50959e-05
ENSG00000151117.4	TMEM86A	1.34389	6.53363e-05
ENSG00000130720.8	FIBCD1	-0.842788	6.54463e-05
ENSG00000132256.14	TRIM5	0.351824	6.54463e-05
ENSG00000178295.10	GEN1	0.236315	6.69006e-05
ENSG00000163029.11	SMC6	0.274599	6.80704e-05
ENSG00000143401.10	ANP32E	-0.338759	6.89329e-05
ENSG00000143384.8	MCL1	0.30161	6.9007e-05
ENSG00000138286.10	FAM149B1	0.316145	7.1205e-05
ENSG00000181007.7	ZFP82	-0.463367	7.1205e-05
ENSG00000103591.8	AAGAB	0.246763	7.25932e-05
ENSG00000112419.10	PHACTR2	0.359068	7.73108e-05
ENSG00000144802.7	NFKBIZ	0.694054	7.96343e-05
ENSG00000072818.7	ACAP1	-0.350262	8.05339e-05
ENSG00000063046.13	EIF4B	-0.222742	8.06719e-05
ENSG00000266208.1	CTD-2267D19.3	-0.460492	8.06719e-05
ENSG00000145246.9	ATP10D	0.62769	8.1837e-05
ENSG00000186354.6	C9orf47	-1.01099	8.25558e-05
ENSG00000137145.16	DENND4C	0.426821	8.26435e-05
ENSG00000196814.10	MVB12B	-0.45724	8.41595e-05
ENSG00000135241.12	PNPLA8	0.381862	8.45288e-05
ENSG00000219481.6	NBPF1	0.483337	8.65252e-05
ENSG00000108448.16	TRIM16L	-0.45975	8.66265e-05
ENSG00000170915.8	PAQR8	0.495644	8.69966e-05
ENSG00000161911.7	TREML1	-1.4261	8.81276e-05
ENSG00000172086.7	KRCC1	0.493908	8.87973e-05
ENSG00000141458.8	NPC1	0.28122	9.10472e-05
ENSG00000179855.5	GIPC3	-1.10279	9.2427e-05
ENSG00000079215.9	SLC1A3	-0.575263	9.243e-05
ENSG00000107815.3	C10orf2	-0.40064	9.243e-05
ENSG00000147649.5	MTDH	-0.253923	9.2472e-05
ENSG00000109466.9	KLHL2	0.338821	9.54695e-05
ENSG00000165406.11	MARCH8	-0.419048	9.54695e-05
ENSG00000143324.9	XPR1	0.311414	9.71463e-05
ENSG00000177854.7	TMEM187	0.458692	9.80785e-05
ENSG00000162711.12	NLRP3	0.283174	9.86451e-05
ENSG00000138336.8	TET1	-0.88542	0.000100473
ENSG00000165731.13	RET	-1.01341	0.000101681
ENSG00000144357.12	UBR3	0.257208	0.000104114
ENSG00000113296.10	THBS4	-0.789182	0.000104161
ENSG00000181656.6	GPR88	-1.04278	0.000108048
ENSG00000196591.7	HDAC2	-0.206668	0.000109256
ENSG00000072364.8	AFF4	0.26159	0.000109966
ENSG00000186792.11	HYAL3	-0.591276	0.000110024
ENSG00000181192.7	DHTKD1	-0.263148	0.000110115
ENSG00000171115.3	GIMAP8	-0.504331	0.000111725
ENSG00000213983.7	AP1G2	0.284653	0.000112632
ENSG00000179152.14	TCAIM	0.317828	0.000115751
ENSG00000184465.11	WDR27	0.436838	0.000118637
ENSG00000160161.5	CILP2	-1.30141	0.000120719
ENSG00000139289.9	PHLDA1	0.603473	0.000121507
ENSG00000233280.2	CRYBG3	0.361723	0.000121507
ENSG00000172785.14	CBWD1	0.434658	0.000124228
ENSG00000099785.6	MARCH2	0.431001	0.000124488
ENSG00000103723.8	AP3B2	1.24852	0.000126049
ENSG00000132749.6	MTL5	-0.359403	0.000126049
ENSG00000180263.9	FGD6	0.904405	0.000126951
ENSG00000163113.10	OTUD7B	0.341176	0.000127176
ENSG00000102226.5	USP11	0.34952	0.000130119
ENSG00000083807.5	SLC27A5	-0.609574	0.000133526
ENSG00000090006.13	LTBP4	-0.237418	0.000133784
ENSG00000092931.7	MFSD11	0.451644	0.000135903
ENSG00000011454.12	RABGAP1	0.334532	0.000136759
ENSG00000138593.4	SECISBP2L	0.385323	0.000136839
ENSG00000159217.5	IGF2BP1	-0.36789	0.000137485
ENSG00000107130.6	NCS1	-0.511126	0.000138235
ENSG00000012822.11	CALCOCO1	0.352559	0.000140903
ENSG00000104635.9	SLC39A14	-0.369274	0.000140903
ENSG00000020633.14	RUNX3	-0.479004	0.000141983
ENSG00000165609.8	NUDT5	-0.34174	0.000143439
ENSG00000100284.16	TOM1	0.308196	0.000143776
ENSG00000204287.9	HLA-DRA	-0.626831	0.000145826
ENSG00000120594.12	PLXDC2	0.609711	0.000146092
ENSG00000185404.12	SP140L	0.441305	0.000146092
ENSG00000127561.10	SYNGR3	-1.10393	0.000147576
ENSG00000080200.5	CRYBG3	0.365409	0.000148981
ENSG00000117528.7	ABCD3	0.338405	0.000149716
ENSG00000075407.13	ZNF37A	-0.39316	0.000150643
ENSG00000181284.2	TMEM102	-0.533871	0.000151602
ENSG00000137274.8	BPHL	0.564271	0.000155867
ENSG00000093167.13	LRRFIP2	0.288768	0.000156821
ENSG00000091490.6	SEL1L3	0.312083	0.000158172
ENSG00000167208.10	SNX20	-0.48599	0.000159112
ENSG00000120896.9	SORBS3	-0.495485	0.000159387
ENSG00000133731.5	IMPA1	0.394042	0.000162348
ENSG00000078967.8	UBE2D4	0.394706	0.000162929
ENSG00000143303.7	RRNAD1	0.415765	0.000165853
ENSG00000110013.8	SIAE	0.359022	0.000165884
ENSG00000010319.2	SEMA3G	-0.673121	0.000166258
ENSG00000189050.10	RNFT1	0.45621	0.000166668
ENSG00000237693.4	IRGM	0.799601	0.000166703
ENSG00000079246.11	XRCC5	-0.231784	0.000167772
ENSG00000157240.2	FZD1	0.420715	0.000170403
ENSG00000115484.10	CCT4	-0.243924	0.00017045
ENSG00000260027.3	HOXB7	-1.76809	0.000172306
ENSG00000153317.10	ASAP1	0.334052	0.000178627
ENSG00000127528.5	KLF2	0.856796	0.000179151
ENSG00000100031.14	GGT1	-0.485626	0.000181893
ENSG00000129219.9	PLD2	0.454859	0.000181893
ENSG00000130598.11	TNNI2	-1.41096	0.000181893
ENSG00000185238.8	PRMT3	-0.315878	0.000181893
ENSG00000072274.8	TFRC	-0.206788	0.000186127
ENSG00000131187.5	F12	-1.15743	0.000186127
ENSG00000158201.5	ABHD3	0.334853	0.000187159
ENSG00000152465.13	NMT2	0.537301	0.000189756
ENSG00000110079.12	MS4A4A	-0.59753	0.000190084
ENSG00000171812.6	COL8A2	-0.570594	0.00019065
ENSG00000107282.5	APBA1	-0.402254	0.000190654
ENSG00000173638.14	SLC19A1	-0.497943	0.000192497
ENSG00000105048.12	TNNT1	-0.87832	0.000193501
ENSG00000138594.8	TMOD3	0.211478	0.000194473
ENSG00000177380.9	PPFIA3	-0.399611	0.000194473
ENSG00000099194.5	SCD	-0.549981	0.000195118
ENSG00000011405.9	PIK3C2A	0.373928	0.000195341
ENSG00000104093.9	DMXL2	0.256358	0.000197247
ENSG00000112144.11	ICK	-0.275191	0.000197247
ENSG00000124222.17	STX16	0.286218	0.000197247
ENSG00000154146.8	NRGN	0.625397	0.00019864
ENSG00000107537.9	PHYH	0.320193	0.00019952
ENSG00000005156.7	LIG3	-0.391662	0.000200087
ENSG00000101096.15	NFATC2	-0.530115	0.000202862
ENSG00000119906.7	FAM178A	0.277751	0.000203485
ENSG00000165140.5	FBP1	-0.441584	0.000203485
ENSG00000182168.10	UNC5C	-0.333618	0.000203485
ENSG00000100330.11	MTMR3	0.250206	0.000206755
ENSG00000067208.10	EVI5	0.330884	0.000208341
ENSG00000105122.8	RASAL3	-0.460346	0.000210026
ENSG00000147383.6	NSDHL	-0.367047	0.000213158
ENSG00000069509.5	FUNDC1	-0.427026	0.000214149
ENSG00000113273.11	ARSB	-0.425989	0.000214405
ENSG00000166900.10	STX3	0.290632	0.000219239
ENSG00000214706.6	IFRD2	-0.546644	0.000219239
ENSG00000079459.8	FDFT1	-0.389556	0.000222061
ENSG00000149516.9	MS4A3	-0.304724	0.000228409
ENSG00000267041.1	ZNF850	-0.358834	0.000229739
ENSG00000101194.13	SLC17A9	-0.510255	0.000231933
ENSG00000152503.5	TRIM36	0.540887	0.000234977
ENSG00000185477.4	GPRIN3	-1.45215	0.000234977
ENSG00000119772.12	DNMT3A	-0.342599	0.000242619
ENSG00000044574.7	HSPA5	-0.324223	0.000247639
ENSG00000198756.6	COLGALT2	-0.466922	0.00024876
ENSG00000169738.3	DCXR	0.466217	0.000250459
ENSG00000107816.13	LZTS2	-0.386731	0.00025641
ENSG00000135763.5	URB2	-0.311925	0.000257694
ENSG00000125900.8	SIRPD	-1.06841	0.000258477
ENSG00000141314.8	RHBDL3	0.657594	0.000258477
ENSG00000198300.8	PEG3	-0.76095	0.000265435
ENSG00000225663.3	FAM195B	0.632125	0.000265435
ENSG00000124788.13	ATXN1	0.273515	0.000266451
ENSG00000137364.4	TPMT	0.347682	0.000266812
ENSG00000175866.11	BAIAP2	0.38976	0.000266812
ENSG00000119878.5	CRIPT	0.404793	0.00027029
ENSG00000124006.10	OBSL1	-0.33546	0.00027029
ENSG00000198420.5	FAM115A	0.588824	0.00027029
ENSG00000105968.14	H2AFV	0.240574	0.000270674
ENSG00000196405.8	EVL	-0.367687	0.000272949
ENSG00000103326.6	CAPN15	-0.391875	0.000274298
ENSG00000151689.8	INPP1	0.33764	0.000274298
ENSG00000159388.5	BTG2	0.304237	0.000274298
ENSG00000161642.13	ZNF385A	-0.463109	0.000274298
ENSG00000173457.6	PPP1R14B	-0.576729	0.000274298
ENSG00000188452.9	CERKL	-0.300395	0.000274962
ENSG00000179240.4	RP11-111M22.2	0.454743	0.0002762
ENSG00000141753.5	IGFBP4	-0.474424	0.000276545
ENSG00000125810.9	CD93	-0.999769	0.000279787
ENSG00000129055.8	ANAPC13	-0.290818	0.000279787
ENSG00000167748.6	KLK1	-1.10347	0.000279787
ENSG00000147206.12	NXF3	-0.362288	0.000284004
ENSG00000109689.10	STIM2	0.461858	0.000285181
ENSG00000104064.12	GABPB1	0.248967	0.000285439
ENSG00000160570.9	DEDD2	-0.337305	0.000285439
ENSG00000176490.4	DIRAS1	-0.663986	0.000287461
ENSG00000130827.5	PLXNA3	0.347658	0.000289097
ENSG00000115935.12	WIPF1	-0.508805	0.000289868
ENSG00000178150.4	ZNF114	-0.767615	0.000289868
ENSG00000169330.4	KIAA1024	-0.552031	0.000292429
ENSG00000178623.7	GPR35	-0.498555	0.000295154
ENSG00000197771.8	MCMBP	-0.195959	0.000295154
ENSG00000101104.8	PABPC1L	0.427868	0.000295812
ENSG00000184261.4	KCNK12	-1.0819	0.000298158
ENSG00000163449.6	TMEM169	1.46425	0.000298471
ENSG00000078269.9	SYNJ2	-0.392281	0.000300249
ENSG00000103174.7	NAGPA	-0.447568	0.000300249
ENSG00000162745.6	OLFML2B	-1.3122	0.000300249
ENSG00000221923.4	ZNF880	-0.569231	0.000304441
ENSG00000034677.7	RNF19A	0.242864	0.000304541
ENSG00000198668.6	CALM1	0.265053	0.000309166
ENSG00000189233.7	NUGGC	1.8046	0.000310412
ENSG00000113719.11	ERGIC1	-0.254707	0.000310692
ENSG00000091073.15	DTX2	-0.398922	0.000321324
ENSG00000079950.9	STX7	0.387455	0.000323049
ENSG00000091317.7	CMTM6	0.399524	0.000327541
ENSG00000151376.12	ME3	-0.59075	0.000327557
ENSG00000180871.3	CXCR2	-0.526384	0.000327557
ENSG00000151116.12	UEVLD	0.343933	0.000328269
ENSG00000130649.5	CYP2E1	-0.722062	0.000336566
ENSG00000149292.12	TTC12	0.504973	0.000336566
ENSG00000101782.10	RIOK3	0.312338	0.000340902
ENSG00000076864.15	RAP1GAP	-0.623845	0.000350662
ENSG00000092929.7	UNC13D	-0.385679	0.000354799
ENSG00000115738.5	ID2	0.347018	0.000355317
ENSG00000179981.9	TSHZ1	-0.334404	0.000358942
ENSG00000071242.7	RPS6KA2	0.492533	0.000364319
ENSG00000124641.10	MED20	0.306845	0.000364319
ENSG00000197217.8	ENTPD4	0.236392	0.000364319
ENSG00000048028.7	USP28	0.306416	0.000365953
ENSG00000108669.12	CYTH1	0.262491	0.000365953
ENSG00000170128.2	GPR25	-1.51149	0.000365953
ENSG00000163728.6	TTC14	0.352415	0.000367747
ENSG00000169379.11	ARL13B	0.443099	0.000368321
ENSG00000172889.11	EGFL7	-0.585183	0.000371993
ENSG00000221890.2	NPTXR	0.562429	0.000371993
ENSG00000112041.8	TULP1	-0.877393	0.000373703
ENSG00000167619.7	TMEM145	-0.683114	0.000374907
ENSG00000077684.11	PHF17	-0.314515	0.000375504
ENSG00000143801.12	PSEN2	0.478638	0.000379638
ENSG00000157657.10	ZNF618	-0.376257	0.000384723
ENSG00000173517.6	PEAK1	0.265015	0.000384723
ENSG00000186517.9	ARHGAP30	-0.343534	0.000392661
ENSG00000133315.6	MACROD1	-0.526799	0.000392784
ENSG00000225830.6	ERCC6	0.374393	0.000399209
ENSG00000164985.10	PSIP1	0.23252	0.000402072
ENSG00000174791.6	RIN1	-0.510147	0.000403343
ENSG00000035141.3	FAM136A	-0.344389	0.000407018
ENSG00000253320.1	KB-1507C5.2	0.753053	0.000413028
ENSG00000114573.5	ATP6V1A	0.279282	0.000416754
ENSG00000067182.3	TNFRSF1A	-0.265023	0.000417306
ENSG00000127418.10	FGFRL1	-0.391003	0.000418952
ENSG00000105672.10	ETV2	-1.03783	0.000419584
ENSG00000110400.6	PVRL1	-0.229976	0.000440366
ENSG00000214194.4	LINC00998	-0.31886	0.000441568
ENSG00000174373.11	RALGAPA1	0.323871	0.000441887
ENSG00000145979.13	TBC1D7	0.354833	0.000443767
ENSG00000168487.13	BMP1	-0.387041	0.000449683
ENSG00000092330.11	TINF2	0.24948	0.000450768
ENSG00000106070.13	GRB10	-0.42043	0.000457429
ENSG00000159433.7	STARD9	0.389859	0.000457429
ENSG00000234444.5	ZNF736	-0.273029	0.00046097
ENSG00000141977.5	CIB3	-1.66721	0.000467192
ENSG00000152904.7	GGPS1	0.33055	0.000469253
ENSG00000145908.8	ZNF300	0.749715	0.000469321
ENSG00000175348.6	TMEM9B	0.25174	0.000470053
ENSG00000159131.12	GART	-0.256019	0.000479005
ENSG00000102882.7	MAPK3	-0.301929	0.000481083
ENSG00000138363.10	ATIC	-0.330026	0.000485147
ENSG00000260001.2	TGFBR3L	-0.85545	0.000491291
ENSG00000103047.3	TANGO6	-0.331077	0.000494739
ENSG00000166436.11	TRIM66	0.317651	0.000495346
ENSG00000198805.7	PNP	-0.458178	0.000499141
ENSG00000031003.6	FAM13B	0.260188	0.00050344
ENSG00000123360.7	PDE1B	0.392129	0.000509458
ENSG00000074803.13	SLC12A1	1.10834	0.000510562
ENSG00000124491.11	F13A1	-0.638819	0.00051119
ENSG00000129493.10	HEATR5A	0.368335	0.000511662
ENSG00000007237.14	GAS7	-0.3841	0.000512019
ENSG00000099985.3	OSM	-0.784131	0.000512019
ENSG00000138756.13	BMP2K	0.282051	0.000514527
ENSG00000156345.13	CDK20	-0.347384	0.000514527
ENSG00000122986.9	HVCN1	-0.455606	0.000523046
ENSG00000138600.5	SPPL2A	0.302989	0.000524607
ENSG00000125148.6	MT2A	0.399422	0.000527274
ENSG00000130544.7	ZNF557	0.229217	0.000527707
ENSG00000136827.11	TOR1A	-0.342971	0.000529156
ENSG00000133318.9	RTN3	0.255823	0.000529942
ENSG00000112079.8	STK38	0.330258	0.000546325
ENSG00000138081.15	FBXO11	0.199408	0.000555875
ENSG00000109475.12	RPL34	-0.227166	0.00056357
ENSG00000214046.4	SMIM7	0.262004	0.00056994
ENSG00000171603.12	CLSTN1	0.166035	0.000583874
ENSG00000168961.12	LGALS9	-0.407089	0.000587362
ENSG00000055163.14	CYFIP2	-0.506735	0.000594105
ENSG00000137547.4	MRPL15	-0.305507	0.000602498
ENSG00000169508.6	GPR183	-0.883561	0.000618329
ENSG00000099622.9	CIRBP	0.318523	0.000621118
ENSG00000220008.2	LINGO3	-0.338198	0.000621118
ENSG00000204304.7	PBX2	-0.275294	0.000626239
ENSG00000142459.4	EVI5L	0.337053	0.000628534
ENSG00000171840.7	NINJ2	-0.563504	0.000629142
ENSG00000149927.13	DOC2A	-0.693602	0.000638936
ENSG00000164512.13	ANKRD55	-1.14082	0.0006462
ENSG00000196177.8	ACADSB	0.329544	0.000646327
ENSG00000177674.11	AGTRAP	-0.311777	0.000648824
ENSG00000205476.4	CCDC85C	-0.29891	0.000649293
ENSG00000171045.10	TSNARE1	-0.350543	0.000651505
ENSG00000239998.1	LILRA2	-0.588012	0.000653913
ENSG00000066084.8	DIP2B	0.176503	0.000654183
ENSG00000186480.8	INSIG1	-0.413465	0.000654183
ENSG00000150681.5	RGS18	-1.41436	0.000655205
ENSG00000116771.5	AGMAT	-0.508611	0.000656447
ENSG00000128604.14	IRF5	-0.324263	0.000657388
ENSG00000119950.16	MXI1	-0.268505	0.000658187
ENSG00000176593.3	CTD-2368P22.1	-0.442306	0.000658198
ENSG00000155307.13	SAMSN1	-1.0075	0.000660958
ENSG00000163219.7	ARHGAP25	-0.443777	0.000663381
ENSG00000122224.13	LY9	-0.601437	0.000663567
ENSG00000188211.4	NCR3LG1	-0.39974	0.000663567
ENSG00000188001.5	TPRG1	-1.18437	0.000664072
ENSG00000102524.7	TNFSF13B	-0.410094	0.000664731
ENSG00000160961.7	ZNF333	0.333008	0.000665258
ENSG00000121281.8	ADCY7	-0.318792	0.0006669
ENSG00000166896.3	XRCC6BP1	-0.425901	0.000673868
ENSG00000130810.15	PPAN	-0.522422	0.000686984
ENSG00000167693.12	NXN	0.656628	0.000691246
ENSG00000137478.10	FCHSD2	-0.284944	0.000692124
ENSG00000121417.9	ZNF211	0.329669	0.000692223
ENSG00000172508.6	CARNS1	0.461327	0.000699871
ENSG00000143842.10	SOX13	0.435941	0.00070247
ENSG00000187980.6	PLA2G2C	-0.966078	0.00070247
ENSG00000131080.10	EDA2R	-0.427264	0.000704183
ENSG00000263053.3	RP11-1055B8.6	0.273045	0.000708596
ENSG00000111676.10	ATN1	-0.195922	0.000722732
ENSG00000103489.7	XYLT1	-0.279631	0.000733127
ENSG00000004478.5	FKBP4	-0.490795	0.000736047
ENSG00000113648.12	H2AFY	-0.268172	0.000737477
ENSG00000132763.10	MMACHC	-0.408491	0.000737477
ENSG00000169641.9	LUZP1	0.210523	0.000742237
ENSG00000137124.6	ALDH1B1	-0.392828	0.000753998
ENSG00000000938.8	FGR	-0.814247	0.0007641
ENSG00000101695.4	RNF125	-0.362133	0.000779777
ENSG00000106780.7	MEGF9	0.350363	0.000781563
ENSG00000136527.13	TRA2B	0.198876	0.000803884
ENSG00000070182.13	SPTB	-0.476193	0.000805256
ENSG00000068793.13	CYFIP1	0.279064	0.000805474
ENSG00000103319.7	EEF2K	-0.276105	0.000818822
ENSG00000120697.4	ALG5	-0.30324	0.000820964
ENSG00000130881.9	LRP3	-0.423543	0.000823864
ENSG00000005175.5	RPAP3	0.283528	0.000835625
ENSG00000158869.6	FCER1G	-0.752615	0.000840558
ENSG00000156931.11	VPS8	0.330439	0.000851724
ENSG00000118971.3	CCND2	-0.647795	0.000852154
ENSG00000147604.9	RPL7	-0.225202	0.000860402
ENSG00000123124.9	WWP1	0.237463	0.000860904
ENSG00000132423.6	COQ3	-0.457846	0.000861664
ENSG00000198624.8	CCDC69	0.31643	0.000868022
ENSG00000100294.8	MCAT	-0.422917	0.00087444
ENSG00000203883.5	SOX18	-1.58034	0.000875877
ENSG00000100154.10	TTC28	0.253915	0.000877827
ENSG00000101000.4	PROCR	0.598635	0.000889812
ENSG00000123562.12	MORF4L2	-0.197442	0.000893893
ENSG00000196950.9	SLC39A10	-0.265919	0.000900923
ENSG00000117148.6	ACTL8	-2.31715	0.000905099
ENSG00000126822.11	PLEKHG3	-0.284545	0.000905099
ENSG00000175182.9	FAM131A	0.41215	0.000909053
ENSG00000047597.5	XK	-0.627189	0.000914554
ENSG00000123329.13	ARHGAP9	-0.380581	0.000917772
ENSG00000112031.11	MTRF1L	0.274404	0.000929329
ENSG00000070610.10	GBA2	0.270574	0.000931726
ENSG00000184897.4	H1FX	0.346707	0.000942962
ENSG00000256525.2	POLG2	0.250504	0.000955312
ENSG00000155858.5	LSM11	-0.354403	0.000970484
ENSG00000080503.15	SMARCA2	0.187351	0.000983901
ENSG00000113013.8	HSPA9	-0.335961	0.000984849
ENSG00000173200.8	PARP15	-0.592083	0.000984849
ENSG00000174238.10	PITPNA	0.164314	0.000984849
ENSG00000080815.14	PSEN1	0.1773	0.000988921
ENSG00000092758.11	COL9A3	-0.644616	0.000993095
ENSG00000099840.9	IZUMO4	0.554171	0.000993095
ENSG00000162923.10	WDR26	0.194951	0.000994468
ENSG00000183726.6	TMEM50A	0.234501	0.000994468
ENSG00000116741.6	RGS2	1.15844	0.000995918
ENSG00000145545.7	SRD5A1	0.605397	0.000995918
ENSG00000159256.8	MORC3	0.241331	0.000995918
ENSG00000163823.3	CCR1	-0.324366	0.000995918
ENSG00000090447.7	TFAP4	-0.477929	0.000999684
ENSG00000149564.7	ESAM	1.1844	0.00100755
ENSG00000104870.8	FCGRT	-0.643226	0.00101081
ENSG00000132510.6	KDM6B	-0.355725	0.00101265
ENSG00000120254.11	MTHFD1L	-0.379783	0.00101265
ENSG00000142687.13	KIAA0319L	0.216003	0.00101758
ENSG00000149257.9	SERPINH1	-0.453449	0.00101758
ENSG00000140368.8	PSTPIP1	-0.495344	0.00104873
ENSG00000016864.12	GLT8D1	-0.286104	0.00105025
ENSG00000132670.16	PTPRA	0.184611	0.00105818
ENSG00000134508.8	CABLES1	-0.384195	0.00105818
ENSG00000136628.13	EPRS	-0.230282	0.00105818
ENSG00000197321.10	SVIL	-0.35559	0.00105932
ENSG00000160325.10	CACFD1	0.411968	0.00106375
ENSG00000145675.10	PIK3R1	0.220039	0.00106378
ENSG00000126243.4	LRFN3	-0.449713	0.00106655
ENSG00000086289.7	EPDR1	-0.447326	0.00107402
ENSG00000161133.12	USP41	-1.93093	0.00107402
ENSG00000145220.9	LYAR	-0.42492	0.00109288
ENSG00000125869.5	LAMP5	-0.321773	0.00109317
ENSG00000183023.14	SLC8A1	1.11185	0.00109317
ENSG00000115902.6	SLC1A4	-0.314234	0.00109489
ENSG00000122729.14	ACO1	0.211201	0.00109621
ENSG00000166224.12	SGPL1	-0.245467	0.00110449
ENSG00000163584.13	RPL22L1	-0.285422	0.00111506
ENSG00000090238.7	YPEL3	0.507731	0.00112745
ENSG00000198216.6	CACNA1E	-1.00769	0.00112836
ENSG00000169598.11	DFFB	-0.387159	0.00112865
ENSG00000143162.7	CREG1	0.173726	0.00113085
ENSG00000167123.14	CERCAM	-0.437321	0.00113085
ENSG00000188157.9	AGRN	-0.198802	0.00113085
ENSG00000184164.10	CRELD2	-0.399491	0.00113409
ENSG00000165682.10	CLEC1B	-2.36598	0.00113425
ENSG00000188130.9	MAPK12	-0.38123	0.00113425
ENSG00000184232.4	OAF	-0.579507	0.0011381
ENSG00000204590.8	GNL1	-0.272191	0.00114022
ENSG00000006607.9	FARP2	0.258339	0.001144
ENSG00000103196.7	CRISPLD2	1.09588	0.00114795
ENSG00000197860.5	SGTB	0.536039	0.00116145
ENSG00000134684.6	YARS	-0.294275	0.00117396
ENSG00000175352.6	NRIP3	0.422038	0.00118418
ENSG00000106105.9	GARS	-0.272188	0.00118613
ENSG00000103042.4	SLC38A7	-0.464537	0.00119646
ENSG00000124120.6	TTPAL	0.245718	0.00120343
ENSG00000154654.10	NCAM2	-0.686162	0.00120343
ENSG00000124783.8	SSR1	-0.206203	0.00121058
ENSG00000172893.11	DHCR7	-0.538035	0.00121058
ENSG00000156968.8	MPV17L	-0.288399	0.00121658
ENSG00000143614.7	GATAD2B	0.237455	0.00122354
ENSG00000049089.9	COL9A2	-0.41779	0.00122424
ENSG00000136051.9	KIAA1033	0.365706	0.00122424
ENSG00000125772.8	GPCPD1	0.330313	0.00122866
ENSG00000172269.12	DPAGT1	-0.378851	0.00122961
ENSG00000139318.7	DUSP6	0.308457	0.00123199
ENSG00000107554.11	DNMBP	0.340278	0.00123257
ENSG00000163013.7	FBXO41	-0.347713	0.00123883
ENSG00000144118.9	RALB	0.287715	0.0012536
ENSG00000156299.8	TIAM1	-0.48791	0.0012536
ENSG00000125656.4	CLPP	-0.580887	0.00125544
ENSG00000071564.10	TCF3	-0.457866	0.00125627
ENSG00000180921.6	FAM83H	-0.22903	0.00125627
ENSG00000181418.7	DDN	-1.39237	0.00125627
ENSG00000164818.11	HEATR2	-0.444367	0.00126142
ENSG00000139131.8	YARS2	-0.296223	0.00126323
ENSG00000197375.8	SLC22A5	-0.404819	0.00127011
ENSG00000095370.15	SH2D3C	-0.512777	0.00127134
ENSG00000142657.16	PGD	0.269435	0.00127134
ENSG00000169371.9	SNUPN	-0.328178	0.00127488
ENSG00000139946.5	PELI2	0.385044	0.00127765
ENSG00000196182.6	STK40	0.239395	0.00127765
ENSG00000108839.7	ALOX12	-0.374196	0.00127848
ENSG00000175305.12	CCNE2	0.293205	0.00127848
ENSG00000076685.14	NT5C2	0.214311	0.00128401
ENSG00000123405.9	NFE2	-0.848606	0.00129051
ENSG00000115350.7	POLE4	0.383026	0.00129326
ENSG00000256087.2	ZNF432	-0.417159	0.00129326
ENSG00000144485.6	HES6	-0.349046	0.00129961
ENSG00000197471.7	SPN	-0.320151	0.00129961
ENSG00000051620.6	HEBP2	-0.224126	0.00130497
ENSG00000148341.13	SH3GLB2	0.282062	0.00130561
ENSG00000103707.5	MTFMT	0.495794	0.00131526
ENSG00000110756.13	HPS5	0.250928	0.00133349
ENSG00000188522.10	FAM83G	-0.400446	0.00133425
ENSG00000178921.9	PFAS	-0.372877	0.00133609
ENSG00000164654.11	MIOS	0.276009	0.00134474
ENSG00000107140.11	TESK1	-0.31837	0.00134808
ENSG00000063241.3	ISOC2	-0.467664	0.00136105
ENSG00000136878.8	USP20	-0.342499	0.00136105
ENSG00000168275.10	COA6	-0.380312	0.00136105
ENSG00000186591.7	UBE2H	0.329226	0.00136105
ENSG00000139517.6	LNX2	0.363699	0.00136521
ENSG00000110076.14	NRXN2	-1.34111	0.00136769
ENSG00000070814.13	TCOF1	-0.390881	0.00137337
ENSG00000138814.12	PPP3CA	0.248273	0.00138474
ENSG00000169733.7	RFNG	-0.395329	0.00138629
ENSG00000198001.9	IRAK4	0.200913	0.00138629
ENSG00000109881.12	CCDC34	-0.339679	0.00138793
ENSG00000133943.16	C14orf159	-0.322695	0.00140328
ENSG00000197323.6	TRIM33	0.221069	0.00140328
ENSG00000128872.5	TMOD2	0.804655	0.00143149
ENSG00000253910.1	PCDHGB2	-0.504451	0.00143149
ENSG00000120008.11	WDR11	0.182911	0.0014405
ENSG00000102908.16	NFAT5	0.304028	0.00144513
ENSG00000214063.6	TSPAN4	-0.472283	0.00144513
ENSG00000142453.7	CARM1	-0.442844	0.00144906
ENSG00000072062.9	PRKACA	0.280274	0.00145892
ENSG00000163602.9	RYBP	0.418773	0.00146117
ENSG00000196843.11	ARID5A	-0.34597	0.00146117
ENSG00000174915.7	PTDSS2	-0.316569	0.00146726
ENSG00000173581.3	CCDC106	-0.506573	0.0014743
ENSG00000158828.5	PINK1	-0.328996	0.00149181
ENSG00000169139.7	UBE2V2	0.211946	0.00151451
ENSG00000105610.4	KLF1	-1.76305	0.00153017
ENSG00000214050.3	FBXO16	-0.740322	0.00154268
ENSG00000173141.4	MRP63	-0.47418	0.00154721
ENSG00000107242.13	PIP5K1B	0.610248	0.0015629
ENSG00000068724.11	TTC7A	-0.400394	0.00156583
ENSG00000046653.10	GPM6B	-0.5718	0.00156928
ENSG00000132142.15	ACACA	-0.293133	0.00157135
ENSG00000078124.7	ACER3	0.313853	0.00157286
ENSG00000143369.10	ECM1	-0.655298	0.00157354
ENSG00000144355.10	DLX1	-0.728171	0.00158497
ENSG00000174547.9	MRPL11	-0.418848	0.00160537
ENSG00000072786.8	STK10	-0.353382	0.00161631
ENSG00000188626.5	GOLGA8M	0.267652	0.0016406
ENSG00000267060.1	PTGES3L	-1.04489	0.00164124
ENSG00000079332.10	SAR1A	0.197813	0.00167417
ENSG00000112992.12	NNT	-0.226852	0.00168001
ENSG00000160752.10	FDPS	-0.300089	0.00170986
ENSG00000115271.6	GCA	0.294569	0.00171089
ENSG00000101849.11	TBL1X	-0.267227	0.0017165
ENSG00000109084.9	TMEM97	-0.375391	0.0017165
ENSG00000183010.12	PYCR1	-0.504451	0.00173137
ENSG00000172081.9	MOB3A	-0.380505	0.00173781
ENSG00000108551.4	RASD1	1.15323	0.00175929
ENSG00000114853.9	ZBTB47	-0.253912	0.00175929
ENSG00000135778.7	NTPCR	-0.257016	0.00175929
ENSG00000163110.10	PDLIM5	0.48634	0.00176581
ENSG00000154914.12	USP43	-0.413635	0.00176975
ENSG00000197872.7	FAM49A	0.272996	0.0017799
ENSG00000170540.10	ARL6IP1	0.200854	0.00178498
ENSG00000128050.4	PAICS	-0.343945	0.00179418
ENSG00000066697.10	MSANTD3	-0.477224	0.00182099
ENSG00000163251.3	FZD5	0.357614	0.00188121
ENSG00000117758.9	STX12	0.259148	0.00188848
ENSG00000153574.8	RPIA	-0.251175	0.00188848
ENSG00000168297.11	PXK	-0.238883	0.00188848
ENSG00000182327.7	GLTPD2	0.979196	0.00188848
ENSG00000182899.10	RPL35A	-0.277854	0.00189367
ENSG00000025293.11	PHF20	0.19147	0.00191415
ENSG00000120451.6	SNX19	0.196575	0.00191415
ENSG00000173418.7	NAA20	-0.186371	0.00191831
ENSG00000204209.6	DAXX	-0.338312	0.00192065
ENSG00000053501.8	USE1	-0.485204	0.00192903
ENSG00000115596.3	WNT6	-0.547752	0.00196219
ENSG00000113504.15	SLC12A7	-0.288572	0.00196368
ENSG00000137760.10	ALKBH8	-0.361967	0.00196368
ENSG00000163792.5	TCF23	-0.709617	0.00198501
ENSG00000125538.7	IL1B	-0.742584	0.00202951
ENSG00000130270.12	ATP8B3	-0.376052	0.0020353
ENSG00000139579.8	NABP2	-0.360314	0.0020353
ENSG00000139644.8	TMBIM6	0.149179	0.0020353
ENSG00000166822.8	TMEM170A	0.268818	0.0020353
ENSG00000170425.3	ADORA2B	-0.350833	0.0020353
ENSG00000136021.13	SCYL2	0.258456	0.00203664
ENSG00000163444.7	TMEM183A	-0.22693	0.00203664
ENSG00000204394.8	VARS	-0.383141	0.00203843
ENSG00000182307.8	C8orf33	-0.380982	0.00204192
ENSG00000107949.12	BCCIP	-0.232903	0.00206039
ENSG00000155363.14	MOV10	0.501123	0.00206039
ENSG00000116133.7	DHCR24	-0.246557	0.00209859
ENSG00000179294.5	C17orf96	-0.649804	0.00209859
ENSG00000166329.2	AC007431.1	-1.00076	0.00210179
ENSG00000051128.14	HOMER3	-0.705276	0.00212
ENSG00000179886.4	TIGD5	-0.4264	0.00213059
ENSG00000051108.10	HERPUD1	-0.287105	0.002132
ENSG00000173198.4	CYSLTR1	-0.369977	0.00214906
ENSG00000204217.8	BMPR2	0.474816	0.00215023
ENSG00000196465.6	MYL6B	-0.475428	0.00215081
ENSG00000188282.8	RUFY4	-1.08387	0.00216734
ENSG00000177706.8	FAM20C	0.372528	0.00218463
ENSG00000032742.13	IFT88	0.431084	0.00218879
ENSG00000171813.10	PWWP2B	-0.310557	0.00219687
ENSG00000169994.14	MYO7B	-0.822733	0.00221767
ENSG00000139631.14	CSAD	0.33821	0.00224278
ENSG00000189298.9	ZKSCAN3	0.26873	0.00224278
ENSG00000158793.9	NIT1	0.282459	0.00226354
ENSG00000132357.9	CARD6	-0.368277	0.00226588
ENSG00000059377.11	TBXAS1	-0.477983	0.00227418
ENSG00000155660.6	PDIA4	-0.313847	0.00228743
ENSG00000117724.8	CENPF	-0.275004	0.00229864
ENSG00000189007.11	ADAT2	-0.288687	0.00229864
ENSG00000110888.13	CAPRIN2	0.535715	0.00231346
ENSG00000139597.12	N4BP2L1	-0.318571	0.00236783
ENSG00000137692.7	DCUN1D5	-0.262606	0.00237912
ENSG00000134247.9	PTGFRN	-0.275431	0.00240084
ENSG00000161267.7	BDH1	-0.381627	0.00242278
ENSG00000069943.5	PIGB	-0.340863	0.00244501
ENSG00000083097.10	DOPEY1	0.366961	0.00244501
ENSG00000104765.10	BNIP3L	0.503506	0.00244501
ENSG00000007866.14	TEAD3	-0.301948	0.00245795
ENSG00000149485.12	FADS1	-0.414483	0.00246536
ENSG00000165730.10	STOX1	0.743658	0.00248975
ENSG00000140538.12	NTRK3	-2.30988	0.00250933
ENSG00000148814.13	LRRC27	-0.291765	0.00251271
ENSG00000105641.3	SLC5A5	-0.947899	0.00252506
ENSG00000197429.6	IPP	0.537601	0.002549
ENSG00000109113.13	RAB34	-0.451573	0.00255268
ENSG00000185915.4	KLHL34	-2.45705	0.00255268
ENSG00000069974.11	RAB27A	-0.389733	0.00255712
ENSG00000145050.11	MANF	-0.343109	0.00258474
ENSG00000126561.12	STAT5A	-0.271299	0.00261047
ENSG00000159200.13	RCAN1	-0.342021	0.00261047
ENSG00000168010.6	ATG16L2	0.321518	0.00261239
ENSG00000181555.15	SETD2	0.163611	0.00261239
ENSG00000107874.6	CUEDC2	-0.354649	0.00262825
ENSG00000179639.6	FCER1A	-1.59699	0.00263909
ENSG00000142544.6	CTU1	-0.359263	0.00265426
ENSG00000186603.4	HPDL	-0.630777	0.00265426
ENSG00000147364.12	FBXO25	-0.331502	0.00267035
ENSG00000100368.9	CSF2RB	-0.279638	0.00267469
ENSG00000198792.8	TMEM184B	0.255478	0.00269605
ENSG00000183785.10	TUBA8	-0.777704	0.00272237
ENSG00000169398.15	PTK2	-0.187587	0.00272483
ENSG00000104689.5	TNFRSF10A	-0.34996	0.00273262
ENSG00000171596.6	NMUR1	-0.365713	0.00273399
ENSG00000198019.8	FCGR1B	-1.28442	0.00273399
ENSG00000010803.12	SCMH1	-0.292949	0.00274733
ENSG00000182004.8	SNRPE	-0.338346	0.00274733
ENSG00000080709.10	KCNN2	-0.351264	0.00275226
ENSG00000089248.6	ERP29	-0.423427	0.00275472
ENSG00000136108.10	CKAP2	0.192753	0.00275846
ENSG00000167378.4	IRGQ	-0.195035	0.00275846
ENSG00000183155.4	RABIF	0.247951	0.00275846
ENSG00000169220.13	RGS14	-0.296179	0.00276357
ENSG00000173376.9	NDNF	-0.630642	0.00276411
ENSG00000118495.14	PLAGL1	0.389617	0.00279641
ENSG00000160360.7	GPSM1	-0.359485	0.00279684
ENSG00000108523.11	RNF167	-0.339078	0.00280533
ENSG00000114982.13	KANSL3	0.251273	0.00281092
ENSG00000156671.8	SAMD8	0.35066	0.00281092
ENSG00000011021.17	CLCN6	-0.298004	0.00281271
ENSG00000108829.9	LRRC59	-0.343205	0.00281271
ENSG00000172006.7	ZNF554	0.359657	0.00281271
ENSG00000241978.5	AKAP2	-0.789799	0.00281271
ENSG00000075539.9	FRYL	0.23347	0.00281479
ENSG00000100271.12	TTLL1	0.382844	0.00281694
ENSG00000090659.13	CD209	-0.910873	0.00281942
ENSG00000167685.10	ZNF444	-0.34994	0.00281942
ENSG00000184489.7	PTP4A3	-0.567831	0.00282154
ENSG00000112659.9	CUL9	0.240161	0.00283519
ENSG00000177728.10	KIAA0195	-0.238521	0.00284041
ENSG00000135297.11	MTO1	-0.299293	0.00285363
ENSG00000087077.7	TRIP6	-0.384311	0.00287693
ENSG00000145685.9	LHFPL2	-0.42196	0.00288503
ENSG00000130309.6	COLGALT1	-0.417714	0.00292184
ENSG00000001084.6	GCLC	0.376938	0.00292769
ENSG00000145794.12	MEGF10	-1.60972	0.00294172
ENSG00000107551.16	RASSF4	-0.29483	0.00296841
ENSG00000179941.6	BBS10	0.407995	0.00296841
ENSG00000187097.8	ENTPD5	0.323745	0.00298476
ENSG00000107789.11	MINPP1	0.305549	0.00298543
ENSG00000138592.9	USP8	0.170236	0.00298543
ENSG00000130962.13	PRRG1	0.360308	0.00300637
ENSG00000198794.7	SCAMP5	-0.583118	0.00301359
ENSG00000090382.2	LYZ	-1.27081	0.00303402
ENSG00000107821.10	KAZALD1	-0.59392	0.00303402
ENSG00000237440.4	ZNF737	-0.451622	0.00305924
ENSG00000148730.6	EIF4EBP2	0.19687	0.00306482
ENSG00000175193.8	PARL	-0.215617	0.00308534
ENSG00000104980.3	TIMM44	-0.391984	0.00308816
ENSG00000178789.4	CD300LB	-0.912975	0.00308864
ENSG00000068354.11	TBC1D25	-0.343968	0.0030957
ENSG00000163479.9	SSR2	-0.269603	0.00312074
ENSG00000204131.6	NHSL2	-1.02201	0.00316323
ENSG00000152475.6	ZNF837	0.480739	0.00316765
ENSG00000172216.4	CEBPB	0.359294	0.00318385
ENSG00000153029.10	MR1	0.24932	0.00319118
ENSG00000067334.9	DNTTIP2	-0.193301	0.00319289
ENSG00000154864.7	PIEZO2	-0.548066	0.00321794
ENSG00000154930.10	ACSS1	-0.268346	0.00321896
ENSG00000186350.8	RXRA	-0.302427	0.00323718
ENSG00000205060.6	SLC35B4	-0.243188	0.00324851
ENSG00000086200.12	IPO11	-0.221733	0.00324889
ENSG00000126088.8	UROD	-0.420917	0.00325288
ENSG00000103544.10	C16orf62	-0.219813	0.00326276
ENSG00000170634.8	ACYP2	0.375382	0.00326276
ENSG00000188559.9	RALGAPA2	0.32952	0.00327299
ENSG00000059728.6	MXD1	0.325403	0.00327812
ENSG00000119471.10	HSDL2	0.234744	0.00327812
ENSG00000152520.9	PAN3	0.177403	0.00327812
ENSG00000157823.12	AP3S2	0.335716	0.00327812
ENSG00000143321.14	HDGF	-0.333178	0.00334238
ENSG00000048162.15	NOP16	-0.486994	0.00334911
ENSG00000116544.7	DLGAP3	-1.45059	0.00335609
ENSG00000180061.5	TMEM150B	-0.685591	0.0033565
ENSG00000059691.7	PET112	-0.389963	0.0034004
ENSG00000204592.5	HLA-E	0.253076	0.00342465
ENSG00000165322.13	ARHGAP12	0.393518	0.0034428
ENSG00000100300.13	TSPO	-0.399045	0.00345015
ENSG00000177272.7	KCNA3	-0.739745	0.00345015
ENSG00000213516.5	RBMXL1	-0.252305	0.00345015
ENSG00000064393.11	HIPK2	0.370059	0.0034683
ENSG00000130363.7	RSPH3	0.384419	0.00347612
ENSG00000163320.6	CGGBP1	0.241084	0.00348029
ENSG00000120694.15	HSPH1	-0.227407	0.00349005
ENSG00000170396.6	ZNF804A	-0.377891	0.00349536
ENSG00000154229.7	PRKCA	0.342789	0.00350512
ENSG00000100628.7	ASB2	-0.753499	0.00351752
ENSG00000101126.11	ADNP	-0.185523	0.00353029
ENSG00000121940.11	CLCC1	0.399942	0.00353029
ENSG00000142798.12	HSPG2	-0.32791	0.00354483
ENSG00000058063.11	ATP11B	0.229011	0.00354652
ENSG00000164989.11	CCDC171	-0.438282	0.00354652
ENSG00000205213.9	LGR4	-0.347007	0.0035534
ENSG00000104613.7	INTS10	-0.178194	0.00357678
ENSG00000084774.9	CAD	-0.375474	0.00358569
ENSG00000143622.6	RIT1	0.321703	0.00359519
ENSG00000074319.8	TSG101	0.196949	0.00359794
ENSG00000135164.14	DMTF1	0.252651	0.00359794
ENSG00000180818.4	HOXC10	-1.2515	0.00364181
ENSG00000164076.12	CAMKV	-1.55925	0.00365452
ENSG00000060749.10	QSER1	-0.214876	0.00366609
ENSG00000062598.13	ELMO2	0.20464	0.00366609
ENSG00000166743.5	ACSM1	-0.571778	0.00366836
ENSG00000163322.9	FAM175A	0.329281	0.00369558
ENSG00000089009.11	RPL6	-0.245279	0.00370901
ENSG00000117013.10	KCNQ4	-0.951456	0.00370901
ENSG00000183621.11	ZNF438	-0.441204	0.00370901
ENSG00000205930.4	C21orf49	0.868346	0.00371404
ENSG00000037042.8	TUBG2	0.557119	0.00372306
ENSG00000161929.10	SCIMP	-0.513086	0.00372682
ENSG00000170271.6	FAXDC2	-0.358947	0.00373216
ENSG00000139514.8	SLC7A1	-0.324387	0.00375187
ENSG00000163528.8	CHCHD4	-0.39295	0.00375206
ENSG00000188706.8	ZDHHC9	-0.301071	0.00376404
ENSG00000163659.8	TIPARP	0.479771	0.00378251
ENSG00000147533.12	GOLGA7	0.178918	0.00379298
ENSG00000100299.13	ARSA	0.247743	0.00381402
ENSG00000133027.13	PEMT	-0.509736	0.003849
ENSG00000157500.6	APPL1	0.218745	0.003849
ENSG00000213339.4	QTRT1	-0.453461	0.00386202
ENSG00000115364.9	MRPL19	-0.227851	0.00388377
ENSG00000072071.12	LPHN1	0.261877	0.00390904
ENSG00000138380.13	CARF	0.36192	0.00391403
ENSG00000141646.9	SMAD4	0.24129	0.00391403
ENSG00000132603.9	NIP7	-0.233807	0.00394933
ENSG00000121966.6	CXCR4	-0.449647	0.0039645
ENSG00000138686.5	BBS7	0.359494	0.00397508
ENSG00000160685.9	ZBTB7B	-0.277191	0.00398075
ENSG00000123179.9	EBPL	-0.282349	0.0039985
ENSG00000126500.3	FLRT1	-0.556725	0.00399969
ENSG00000184634.11	MED12	-0.265968	0.00399969
ENSG00000119929.8	CUTC	-0.295892	0.00408653
ENSG00000174233.7	ADCY6	0.614459	0.00409694
ENSG00000011258.11	MBTD1	-0.163131	0.00409804
ENSG00000100321.10	SYNGR1	-0.303986	0.00411818
ENSG00000089847.8	ANKRD24	0.552618	0.00414871
ENSG00000127533.3	F2RL3	-0.899474	0.00415373
ENSG00000167615.12	LENG8	0.305842	0.00415373
ENSG00000177000.6	MTHFR	0.228073	0.00415373
ENSG00000019144.12	PHLDB1	-0.400535	0.00416891
ENSG00000009724.12	MASP2	0.523402	0.00422518
ENSG00000124486.8	USP9X	0.197186	0.00422518
ENSG00000158104.7	HPD	-0.569039	0.00423737
ENSG00000136158.6	SPRY2	0.370845	0.00436794
ENSG00000163864.10	NMNAT3	-0.334047	0.0043699
ENSG00000124444.11	ZNF576	-0.265308	0.00439446
ENSG00000149136.3	SSRP1	-0.356279	0.00439446
ENSG00000170832.8	USP32	-0.209288	0.00439446
ENSG00000075234.12	TTC38	0.22409	0.00440198
ENSG00000134955.7	SLC37A2	0.363527	0.00441431
ENSG00000101945.12	SUV39H1	-0.431664	0.00443885
ENSG00000163682.11	RPL9	-0.213555	0.00445935
ENSG00000133316.11	WDR74	-0.383359	0.00446568
ENSG00000198576.2	ARC	1.96025	0.0044822
ENSG00000101290.9	CDS2	0.22113	0.00450548
ENSG00000164442.8	CITED2	-0.317674	0.00450548
ENSG00000197961.7	ZNF121	-0.201414	0.00450548
ENSG00000173614.9	NMNAT1	0.338682	0.00450742
ENSG00000136159.3	NUDT15	0.319227	0.00451503
ENSG00000198482.6	ZNF808	-0.307676	0.00452825
ENSG00000132950.14	ZMYM5	0.241564	0.00453388
ENSG00000166233.8	ARIH1	0.170846	0.00453388
ENSG00000136754.12	ABI1	0.180022	0.00453529
ENSG00000065615.9	CYB5R4	0.216583	0.00453718
ENSG00000160131.9	VMA21	-0.196797	0.00453718
ENSG00000187650.3	VMAC	0.387384	0.00453718
ENSG00000135148.7	TRAFD1	0.24666	0.00456849
ENSG00000268759.1	AC135983.2	0.33883	0.00456903
ENSG00000167695.10	FAM57A	-0.374243	0.00457143
ENSG00000137168.7	PPIL1	-0.229253	0.00457531
ENSG00000110768.7	GTF2H1	-0.205205	0.00457728
ENSG00000130733.6	YIPF2	-0.3111	0.00459127
ENSG00000092036.12	HAUS4	0.198893	0.00461613
ENSG00000103202.8	NME4	-0.55466	0.00462415
ENSG00000130997.12	POLN	0.519826	0.00464707
ENSG00000184014.3	DENND5A	0.249759	0.00470878
ENSG00000137275.9	RIPK1	0.209839	0.00471165
ENSG00000092108.16	SCFD1	0.284671	0.00472086
ENSG00000107281.5	NPDC1	-0.373097	0.00472517
ENSG00000085433.11	WDR47	0.247662	0.00480525
ENSG00000205784.2	ARRDC5	1.08798	0.00482493
ENSG00000064652.6	SNX24	0.617949	0.00484447
ENSG00000073536.13	NLE1	-0.341958	0.00485394
ENSG00000162972.6	C2orf47	-0.310723	0.00485394
ENSG00000108179.9	PPIF	-0.379832	0.00485522
ENSG00000100139.9	MICALL1	-0.290832	0.00486186
ENSG00000135482.2	ZC3H10	0.337146	0.00487476
ENSG00000243477.1	NAT6	-0.510863	0.00487476
ENSG00000075914.8	EXOSC7	-0.297186	0.00487717
ENSG00000166855.5	CLPX	-0.200219	0.00487847
ENSG00000132382.10	MYBBP1A	-0.409352	0.0049006
ENSG00000070614.10	NDST1	-0.397332	0.00492394
ENSG00000081177.14	EXD2	-0.319592	0.00493189
ENSG00000103222.14	ABCC1	-0.182163	0.00493189
ENSG00000100714.11	MTHFD1	-0.346055	0.0049512
ENSG00000170876.7	TMEM43	-0.254669	0.0049512
ENSG00000181026.13	AEN	-0.386543	0.00495675
ENSG00000106367.9	AP1S1	-0.324608	0.00502151
ENSG00000110031.8	LPXN	-0.295703	0.00502566
ENSG00000138758.7	SEPT11	-0.227939	0.00502804
ENSG00000039650.5	PNKP	0.242767	0.00503466
ENSG00000175198.10	PCCA	0.223185	0.00504492
ENSG00000105516.6	DBP	-0.312668	0.00506573
ENSG00000182162.5	P2RY8	-0.412524	0.0050838
ENSG00000006534.11	ALDH3B1	0.251245	0.00510336
ENSG00000113318.9	MSH3	0.258664	0.00510336
ENSG00000155254.8	MARVELD1	-0.342576	0.00510336
ENSG00000162869.11	PPP1R21	0.219358	0.00510336
ENSG00000163362.6	C1orf106	-0.326582	0.00510336
ENSG00000182308.5	DCAF4L1	-0.889821	0.00510336
ENSG00000144867.7	SRPRB	-0.227687	0.00511892
ENSG00000073060.11	SCARB1	-0.41977	0.00515603
ENSG00000167701.9	GPT	0.40949	0.00518169
ENSG00000101187.11	SLCO4A1	-0.40685	0.00524157
ENSG00000143847.11	PPFIA4	0.328005	0.00524157
ENSG00000150756.9	FAM173B	0.230251	0.00524157
ENSG00000171282.9	RP11-1055B8.7	0.250402	0.00524157
ENSG00000123136.10	DDX39A	-0.395026	0.00524394
ENSG00000168255.14	POLR2J3	0.279669	0.00524394
ENSG00000146223.10	RPL7L1	-0.184941	0.00525783
ENSG00000100380.8	ST13	-0.179087	0.00527224
ENSG00000138074.10	SLC5A6	-0.367538	0.00527224
ENSG00000074201.4	CLNS1A	-0.217004	0.00531355
ENSG00000040633.8	PHF23	-0.298006	0.0053205
ENSG00000006114.11	SYNRG	0.181762	0.00535309
ENSG00000053702.10	NRIP2	0.327989	0.00535309
ENSG00000113763.6	UNC5A	-0.559352	0.00536227
ENSG00000144711.9	IQSEC1	-0.276217	0.00538304
ENSG00000174939.6	ASPHD1	-0.501562	0.0053915
ENSG00000171208.5	NETO2	-0.204543	0.00540679
ENSG00000198937.8	CCDC167	-0.499534	0.00540679
ENSG00000227051.4	C14orf132	0.932095	0.00540679
ENSG00000107719.8	PALD1	-0.986743	0.00544867
ENSG00000072401.10	UBE2D1	0.393516	0.00546515
ENSG00000126467.6	TSKS	-0.714629	0.00546599
ENSG00000126351.8	THRA	-0.373344	0.00552132
ENSG00000267260.1	CTD-2162K18.4	-1.16977	0.00554103
ENSG00000155629.10	PIK3AP1	-0.204954	0.00554397
ENSG00000221926.7	TRIM16	-0.218145	0.00554397
ENSG00000167721.6	TSR1	-0.312063	0.00558468
ENSG00000174010.9	KLHL15	0.209156	0.00558468
ENSG00000141873.6	SLC39A3	-0.439853	0.00561277
ENSG00000151233.6	GXYLT1	0.272372	0.00563383
ENSG00000019169.9	MARCO	-1.90931	0.00564349
ENSG00000108176.10	DNAJC12	-1.21174	0.00565362
ENSG00000119900.7	OGFRL1	0.297553	0.00565362
ENSG00000129993.10	CBFA2T3	-0.350792	0.00565988
ENSG00000123552.13	USP45	0.364016	0.00572146
ENSG00000110104.7	CCDC86	-0.46531	0.00572741
ENSG00000135951.10	TSGA10	0.551848	0.00574675
ENSG00000123131.8	PRDX4	-0.256831	0.00575831
ENSG00000068438.10	FTSJ1	-0.338089	0.00579308
ENSG00000107968.5	MAP3K8	0.364209	0.00580132
ENSG00000140043.7	PTGR2	0.478523	0.00580132
ENSG00000197603.9	C5orf42	0.455066	0.00583918
ENSG00000139531.8	SUOX	0.237596	0.00586682
ENSG00000138303.13	ASCC1	0.235671	0.00590723
ENSG00000163820.10	FYCO1	-0.207018	0.00592106
ENSG00000138073.9	PREB	-0.375182	0.00593232
ENSG00000140691.12	ARMC5	-0.35476	0.00593558
ENSG00000166159.6	LRTM2	-0.537083	0.00594481
ENSG00000124766.4	SOX4	-0.279508	0.00595932
ENSG00000165732.8	DDX21	-0.263334	0.00601228
ENSG00000075340.18	ADD2	-0.289906	0.00601891
ENSG00000164077.9	MON1A	-0.433478	0.0060658
ENSG00000138459.4	SLC35A5	0.295756	0.00607231
ENSG00000160214.8	RRP1	-0.363029	0.00608112
ENSG00000205544.3	TMEM256	0.35121	0.00608112
ENSG00000249459.4	ZNF286B	-0.594447	0.00608112
ENSG00000120162.9	MOB3B	0.442706	0.0060986
ENSG00000163960.7	UBXN7	0.203057	0.00613094
ENSG00000069424.10	KCNAB2	-0.340161	0.00613859
ENSG00000182827.8	ACBD3	0.202358	0.00615045
ENSG00000126091.15	ST3GAL3	-0.347529	0.00615796
ENSG00000159884.7	CCDC107	-0.574689	0.0061708
ENSG00000005844.13	ITGAL	-0.396777	0.00620938
ENSG00000125875.9	TBC1D20	0.214303	0.00621883
ENSG00000186998.11	EMID1	-0.484058	0.0062729
ENSG00000198521.7	ZNF43	-0.402947	0.00633691
ENSG00000135537.12	LACE1	-0.287231	0.00634287
ENSG00000156869.8	FRRS1	0.417257	0.00634287
ENSG00000183605.12	SFXN4	-0.242583	0.00634287
ENSG00000162894.7	FAIM3	-0.933382	0.00637429
ENSG00000166128.8	RAB8B	0.385661	0.00639765
ENSG00000077420.11	APBB1IP	-0.577857	0.00639958
ENSG00000126773.8	PCNXL4	0.208782	0.00641988
ENSG00000118058.16	KMT2A	-0.196237	0.00647518
ENSG00000144040.8	SFXN5	0.343388	0.00648774
ENSG00000132356.7	PRKAA1	0.255775	0.00651519
ENSG00000125166.8	GOT2	-0.259725	0.0065169
ENSG00000182771.13	GRID1	-1.35965	0.0065169
ENSG00000103404.10	USP31	-0.244946	0.00651971
ENSG00000126070.14	AGO3	0.22883	0.00651971
ENSG00000131042.9	LILRB2	0.470594	0.00651971
ENSG00000134954.10	ETS1	0.515662	0.00651971
ENSG00000188280.7	FAM230A	-1.34679	0.00651971
ENSG00000114554.7	PLXNA1	-0.254917	0.00652306
ENSG00000184566.2	AC132216.1	0.348513	0.00652306
ENSG00000135048.9	TMEM2	0.570611	0.00656055
ENSG00000184293.3	CLECL1	-0.336631	0.00659747
ENSG00000163961.4	RNF168	0.233393	0.00660641
ENSG00000232859.5	LYRM9	0.823065	0.0066099
ENSG00000147465.7	STAR	-0.411114	0.0066101
ENSG00000101082.9	SLA2	-0.649655	0.00662612
ENSG00000149100.8	EIF3M	-0.13212	0.00662612
ENSG00000116711.8	PLA2G4A	0.294382	0.00666918
ENSG00000166986.8	MARS	-0.256715	0.00670253
ENSG00000197798.4	FAM118B	0.271767	0.00670253
ENSG00000196793.9	ZNF239	-0.629048	0.00670819
ENSG00000105186.10	ANKRD27	-0.30835	0.00674235
ENSG00000145741.11	BTF3	-0.133684	0.00679186
ENSG00000135821.12	GLUL	-0.224496	0.0068476
ENSG00000157873.13	TNFRSF14	-0.313626	0.0068476
ENSG00000166398.8	KIAA0355	0.362144	0.0068476
ENSG00000166439.5	RNF169	-0.197405	0.0068476
ENSG00000233198.2	RNF224	0.723964	0.0068724
ENSG00000103056.7	SMPD3	-0.27878	0.00689811
ENSG00000148700.9	ADD3	0.455963	0.00690549
ENSG00000145882.6	PCYOX1L	0.24419	0.00692259
ENSG00000129450.4	SIGLEC9	-0.85729	0.00693553
ENSG00000055118.10	KCNH2	-1.0675	0.0069641
ENSG00000155111.10	CDK19	0.199911	0.00696779
ENSG00000114439.14	BBX	-0.222127	0.00697171
ENSG00000206560.6	ANKRD28	-0.227148	0.00700621
ENSG00000175832.8	ETV4	-0.404176	0.00702606
ENSG00000161010.10	C5orf45	0.329587	0.00702713
ENSG00000092621.7	PHGDH	-0.519123	0.00703846
ENSG00000135317.8	SNX14	0.235828	0.00703846
ENSG00000170439.5	METTL7B	-0.861014	0.00703846
ENSG00000064490.9	RFXANK	-0.464464	0.00705547
ENSG00000147130.10	ZMYM3	-0.23443	0.00707
ENSG00000163633.6	C4orf36	-0.335742	0.00707
ENSG00000102178.8	UBL4A	-0.341597	0.00712265
ENSG00000106397.7	PLOD3	-0.418904	0.00712265
ENSG00000083223.13	ZCCHC6	0.179809	0.00712766
ENSG00000214022.7	REPIN1	-0.269766	0.00720889
ENSG00000113460.8	BRIX1	-0.205912	0.00722748
ENSG00000119397.12	CNTRL	-0.136706	0.00724767
ENSG00000110063.4	DCPS	-0.434775	0.0073916
ENSG00000105197.6	TIMM50	-0.351816	0.0074215
ENSG00000119326.10	CTNNAL1	0.420124	0.00742617
ENSG00000149218.4	ENDOD1	0.299429	0.00743874
ENSG00000150455.9	TIRAP	0.484238	0.00744461
ENSG00000183431.7	SF3A3	-0.319555	0.00744951
ENSG00000005882.7	PDK2	-0.354318	0.00746921
ENSG00000129292.16	PHF20L1	0.244421	0.00747591
ENSG00000188243.8	COMMD6	0.221463	0.00749348
ENSG00000179300.3	ZCCHC5	-1.97877	0.00751545
ENSG00000138095.14	LRPPRC	-0.169644	0.00753158
ENSG00000148481.9	FAM188A	0.296352	0.00753828
ENSG00000136828.14	RALGPS1	0.401383	0.00758622
ENSG00000161664.2	ASB16	0.420214	0.00762679
ENSG00000058262.5	SEC61A1	-0.274927	0.00769079
ENSG00000121274.8	PAPD5	0.25169	0.00770422
ENSG00000141956.9	PRDM15	-0.280468	0.00770708
ENSG00000141524.11	TMC6	-0.276528	0.00771153
ENSG00000185614.4	FAM212A	-0.562468	0.00771153
ENSG00000168792.4	ABHD15	-0.306277	0.00771987
ENSG00000188997.3	KCTD21	0.413236	0.00771987
ENSG00000161048.7	NAPEPLD	0.28424	0.00772125
ENSG00000081014.6	AP4E1	0.25653	0.00772163
ENSG00000100994.7	PYGB	0.21346	0.00772163
ENSG00000105821.10	DNAJC2	-0.222434	0.00772163
ENSG00000139629.11	GALNT6	-0.280168	0.00772163
ENSG00000214160.5	ALG3	-0.500337	0.00772163
ENSG00000250317.4	SMIM20	0.293988	0.00772163
ENSG00000100592.11	DAAM1	0.342183	0.00773655
ENSG00000203832.6	NBPF20	0.50341	0.00773981
ENSG00000170917.9	NUDT6	0.360945	0.00776528
ENSG00000165282.9	PIGO	-0.273041	0.00777183
ENSG00000112514.11	CUTA	-0.326004	0.00782467
ENSG00000130775.11	THEMIS2	0.262837	0.00782467
ENSG00000136098.12	NEK3	-0.382478	0.00782467
ENSG00000162576.12	MXRA8	0.383965	0.00782467
ENSG00000215712.6	TMEM242	0.32695	0.00782467
ENSG00000113657.8	DPYSL3	0.74099	0.00783195
ENSG00000137098.9	SPAG8	0.642317	0.00785763
ENSG00000128228.4	SDF2L1	-0.529767	0.00787672
ENSG00000166562.4	SEC11C	-0.43486	0.00787672
ENSG00000134897.9	BIVM	-0.278365	0.00790266
ENSG00000101109.7	STK4	0.181387	0.00791412
ENSG00000007255.6	TRAPPC6A	0.353794	0.00792355
ENSG00000170759.10	KIF5B	0.146752	0.00794391
ENSG00000179195.11	ZNF664	0.244495	0.00794957
ENSG00000197183.8	C20orf112	-0.329281	0.00795509
ENSG00000181029.7	TRAPPC5	-0.98661	0.00798544
ENSG00000003756.12	RBM5	0.142513	0.00800022
ENSG00000003249.9	DBNDD1	-0.738796	0.00801746
ENSG00000089902.8	RCOR1	0.152332	0.0081005
ENSG00000109107.9	ALDOC	0.391695	0.00810374
ENSG00000148225.11	WDR31	0.429902	0.00810374
ENSG00000118707.5	TGIF2	-0.307904	0.00811635
ENSG00000136819.10	C9orf78	-0.324624	0.00818905
ENSG00000114796.11	KLHL24	0.261201	0.00819291
ENSG00000181856.10	SLC2A4	-0.904673	0.00819291
ENSG00000164038.10	SLC9B2	-0.362517	0.00821112
ENSG00000183624.9	HMCES	0.23201	0.00821112
ENSG00000174684.6	B3GNT1	-0.450181	0.00822071
ENSG00000099377.9	HSD3B7	-0.449848	0.00823539
ENSG00000182400.10	TRAPPC6B	0.239561	0.0082618
ENSG00000120656.7	TAF12	0.395653	0.00829922
ENSG00000105576.11	TNPO2	-0.338514	0.00830029
ENSG00000131188.7	PRR7	-0.461519	0.00830903
ENSG00000053372.4	MRTO4	-0.397032	0.00835389
ENSG00000170515.9	PA2G4	-0.384939	0.00835389
ENSG00000180340.5	FZD2	-0.442093	0.00841074
ENSG00000155313.11	USP25	0.244119	0.00841329
ENSG00000153786.8	ZDHHC7	0.218983	0.00846694
ENSG00000119004.10	CYP20A1	0.221986	0.00853235
ENSG00000198945.3	L3MBTL3	-0.30553	0.00854161
ENSG00000127507.13	EMR2	-0.189276	0.0085848
ENSG00000070718.7	AP3M2	0.275765	0.00860198
ENSG00000099284.9	H2AFY2	-0.414797	0.00862482
ENSG00000138614.10	VWA9	-0.19012	0.00863483
ENSG00000008516.12	MMP25	-0.474016	0.00869095
ENSG00000180008.8	SOCS4	0.238144	0.00874956
ENSG00000214026.6	MRPL23	-0.500268	0.00875483
ENSG00000167232.9	ZNF91	-0.24217	0.00875651
ENSG00000179218.9	CALR	-0.351104	0.00876187
ENSG00000133048.8	CHI3L1	-1.25612	0.00878748
ENSG00000113621.10	TXNDC15	-0.27933	0.0088329
ENSG00000169895.5	SYAP1	0.227419	0.00884793
ENSG00000143367.11	TUFT1	0.574237	0.00885196
ENSG00000145506.9	NKD2	-0.305667	0.0088586
ENSG00000152518.5	ZFP36L2	-0.270945	0.0088586
ENSG00000171863.8	RPS7	-0.193581	0.00888878
ENSG00000106991.9	ENG	-0.390297	0.00889097
ENSG00000126602.6	TRAP1	-0.358923	0.00891912
ENSG00000146083.7	RNF44	-0.275175	0.00892797
ENSG00000120963.7	ZNF706	-0.168202	0.00892905
ENSG00000023892.9	DEF6	-0.298854	0.00896107
ENSG00000160305.13	DIP2A	0.1825	0.00898079
ENSG00000185869.9	ZNF829	-0.411691	0.00898079
ENSG00000188811.8	NHLRC3	0.306657	0.00898317
ENSG00000145782.8	ATG12	0.267534	0.00898955
ENSG00000254521.2	SIGLEC12	-0.569713	0.00898955
ENSG00000122965.6	RBM19	-0.340467	0.00905364
ENSG00000129003.11	VPS13C	0.228642	0.00905364
ENSG00000129187.10	DCTD	-0.1802	0.00905364
ENSG00000125630.11	POLR1B	-0.235571	0.00905469
ENSG00000092531.5	SNAP23	0.231549	0.00906723
ENSG00000008838.13	MED24	-0.300584	0.00907045
ENSG00000176978.9	DPP7	-0.415307	0.00907634
ENSG00000143543.10	JTB	-0.252145	0.00908667
ENSG00000160445.6	ZER1	0.235379	0.00908667
ENSG00000112367.6	FIG4	0.193807	0.00914903
ENSG00000122042.9	UBL3	0.265795	0.00916406
ENSG00000101445.5	PPP1R16B	-0.293105	0.00921414
ENSG00000110628.9	SLC22A18	0.370326	0.00923396
ENSG00000136997.10	MYC	-0.493448	0.00923396
ENSG00000143164.11	DCAF6	-0.216578	0.00923396
ENSG00000175105.5	ZNF654	0.273562	0.00923396
ENSG00000161533.7	ACOX1	0.160404	0.00928832
ENSG00000100485.7	SOS2	0.223498	0.00929484
ENSG00000136205.12	TNS3	-0.231191	0.00929484
ENSG00000152192.6	POU4F1	-1.16124	0.00929484
ENSG00000123130.12	ACOT9	0.30908	0.00931631
ENSG00000171766.11	GATM	-0.316419	0.00931869
ENSG00000134910.8	STT3A	-0.31358	0.00932616
ENSG00000168528.7	SERINC2	-0.285464	0.00935876
ENSG00000136938.8	ANP32B	-0.310753	0.00936039
ENSG00000172795.11	DCP2	0.226884	0.00942538
ENSG00000065485.13	PDIA5	-0.3666	0.00942611
ENSG00000162337.7	LRP5	-0.300725	0.00942611
ENSG00000182134.11	TDRKH	0.354644	0.00949264
ENSG00000116793.11	PHTF1	0.242064	0.00950267
ENSG00000080189.10	SLC35C2	-0.271572	0.00953657
ENSG00000175592.4	FOSL1	-0.559196	0.00953657
ENSG00000213694.3	S1PR3	-0.562266	0.00953657
ENSG00000116670.10	MAD2L2	-0.353479	0.00954368
ENSG00000126895.9	AVPR2	-0.42307	0.00954368
ENSG00000204682.5	CASC10	-0.88192	0.00954368
ENSG00000162783.8	IER5	0.26568	0.0095831
ENSG00000176148.11	TCP11L1	-0.302757	0.00965062
ENSG00000213918.6	DNASE1	0.240576	0.00968361
ENSG00000095637.16	SORBS1	1.33359	0.00968426
ENSG00000122140.6	MRPS2	-0.436795	0.00978382
ENSG00000141580.11	WDR45B	0.158572	0.00979176
ENSG00000126249.3	PDCD2L	-0.456582	0.00981676
ENSG00000116649.5	SRM	-0.444916	0.00983959
ENSG00000133265.6	HSPBP1	-0.285138	0.00984147
ENSG00000170921.10	TANC2	0.224804	0.00985641
ENSG00000160818.12	GPATCH4	-0.371961	0.00987648
ENSG00000198915.7	RASGEF1A	-0.954432	0.00989085
ENSG00000151422.8	FER	0.298236	0.0098966
ENSG00000105698.11	USF2	-0.307329	0.00990244
ENSG00000107290.9	SETX	0.165809	0.00993834
ENSG00000147416.6	ATP6V1B2	0.144918	0.00997979
ENSG00000122203.10	KIAA1191	0.209512	0.0100318
ENSG00000224420.3	ADM5	-0.651579	0.0100318
ENSG00000183273.2	CCDC60	0.577847	0.0100353
ENSG00000118292.4	C1orf54	-0.505422	0.0100509
ENSG00000184216.7	IRAK1	-0.342543	0.0101149
ENSG00000138175.8	ARL3	0.446009	0.010132
ENSG00000166387.7	PPFIBP2	0.254536	0.0101488
ENSG00000118985.10	ELL2	0.371599	0.0101538
ENSG00000107404.13	DVL1	-0.253459	0.0101964
ENSG00000111885.5	MAN1A1	0.287782	0.0101964
ENSG00000136813.10	KIAA0368	-0.169668	0.0102111
ENSG00000144840.4	RABL3	-0.197333	0.0102145
ENSG00000166181.8	API5	0.182084	0.0102145
ENSG00000196628.9	TCF4	-0.72117	0.0102145
ENSG00000115145.5	STAM2	0.236102	0.0102145
ENSG00000185219.11	ZNF445	0.197051	0.0102145
ENSG00000130770.13	ATPIF1	-0.279664	0.0102261
ENSG00000103495.9	MAZ	-0.424564	0.010259
ENSG00000115750.12	TAF1B	0.239088	0.010295
ENSG00000042445.9	RETSAT	0.170565	0.0103509
ENSG00000114739.9	ACVR2B	-0.343012	0.0103725
ENSG00000159461.10	AMFR	0.192162	0.0103725
ENSG00000177565.11	TBL1XR1	-0.178502	0.0103989
ENSG00000148943.7	LIN7C	0.214879	0.010433
ENSG00000109534.12	GAR1	-0.262	0.0104346
ENSG00000140400.10	MAN2C1	0.27525	0.0104346
ENSG00000150753.7	CCT5	-0.318415	0.0104346
ENSG00000206527.5	PTPLB	0.297232	0.0104371
ENSG00000130584.6	ZBTB46	-0.323333	0.0104456
ENSG00000075131.5	TIPIN	-0.300001	0.0104467
ENSG00000110218.4	PANX1	0.227204	0.0104467
ENSG00000143578.11	CREB3L4	-0.339964	0.0105841
ENSG00000185100.6	ADSSL1	0.318484	0.0105841
ENSG00000174007.7	CEP19	0.374892	0.010652
ENSG00000119711.8	ALDH6A1	0.21975	0.0106869
ENSG00000100577.14	GSTZ1	0.223828	0.010735
ENSG00000205189.7	ZBTB10	0.210863	0.0107868
ENSG00000162073.9	PAQR4	-0.309546	0.0107978
ENSG00000010404.13	IDS	0.393272	0.0108197
ENSG00000171862.5	PTEN	-0.192408	0.0108337
ENSG00000143851.11	PTPN7	-0.327594	0.0108343
ENSG00000155380.7	SLC16A1	-0.238979	0.010842
ENSG00000105352.6	CEACAM4	-0.485398	0.0109327
ENSG00000111880.11	RNGTT	0.157952	0.0109327
ENSG00000135905.14	DOCK10	0.253151	0.0109327
ENSG00000185633.6	NDUFA4L2	-0.569635	0.0109327
ENSG00000197595.1	C13orf35	1.49069	0.0109327
ENSG00000055609.13	KMT2C	0.148513	0.0109358
ENSG00000116337.11	AMPD2	-0.33497	0.0110042
ENSG00000101115.8	SALL4	-0.751604	0.0110184
ENSG00000105722.5	ERF	-0.340642	0.0110184
ENSG00000146592.12	CREB5	-0.415496	0.0110184
ENSG00000150768.11	DLAT	-0.195744	0.0110184
ENSG00000168564.5	CDKN2AIP	0.171884	0.0110184
ENSG00000142864.10	SERBP1	-0.209299	0.0110275
ENSG00000119383.15	PPP2R4	-0.239109	0.0110483
ENSG00000083544.9	TDRD3	-0.218367	0.0110628
ENSG00000102878.11	HSF4	0.584046	0.0110628
ENSG00000166261.6	ZNF202	-0.220459	0.0110919
ENSG00000131725.9	WDR44	0.286542	0.0110948
ENSG00000137040.8	RANBP6	0.182844	0.0110948
ENSG00000170653.14	ATF7	0.257195	0.0111025
ENSG00000104679.6	R3HCC1	-0.357796	0.0111331
ENSG00000106803.5	SEC61B	-0.288456	0.0111411
ENSG00000127948.9	POR	0.236322	0.0111411
ENSG00000181513.10	ACBD4	0.29603	0.011175
ENSG00000144655.10	CSRNP1	0.323985	0.0111789
ENSG00000172493.16	AFF1	-0.196483	0.0111789
ENSG00000186818.8	LILRB4	-0.428385	0.0111789
ENSG00000015532.5	XYLT2	-0.255367	0.0111805
ENSG00000132661.3	NXT1	-0.341545	0.0112269
ENSG00000111727.7	HCFC2	0.255592	0.0113017
ENSG00000131781.8	FMO5	-0.356363	0.011313
ENSG00000197635.5	DPP4	-0.559036	0.011324
ENSG00000166199.8	ALKBH3	-0.30818	0.0113445
ENSG00000115541.6	HSPE1	-0.311993	0.0113608
ENSG00000186510.7	CLCNKA	-1.25993	0.0113608
ENSG00000110075.10	PPP6R3	0.127791	0.011402
ENSG00000128487.12	SPECC1	-0.272112	0.011402
ENSG00000152256.9	PDK1	-0.339058	0.0114255
ENSG00000113161.11	HMGCR	-0.236658	0.0114629
ENSG00000075826.12	SEC31B	0.409585	0.0115066
ENSG00000118197.9	DDX59	0.228421	0.0116577
ENSG00000156042.13	TTC18	0.744014	0.0116577
ENSG00000006652.9	IFRD1	0.261124	0.0116581
ENSG00000139266.5	MARCH9	-0.385328	0.011703
ENSG00000155561.10	NUP205	-0.218743	0.0117699
ENSG00000103888.11	KIAA1199	0.586876	0.0117957
ENSG00000239672.3	NME1	-0.361564	0.0118268
ENSG00000167994.7	RAB3IL1	-1.19579	0.0118734
ENSG00000131196.13	NFATC1	-0.386902	0.011913
ENSG00000134333.9	LDHA	-0.295333	0.011913
ENSG00000175556.12	LONRF3	-0.433463	0.0119192
ENSG00000065600.8	TMEM206	-0.218332	0.0120158
ENSG00000213937.3	CLDN9	0.692777	0.0120253
ENSG00000105472.8	CLEC11A	-0.39386	0.0120287
ENSG00000049656.9	CLPTM1L	-0.206434	0.0120513
ENSG00000146731.6	CCT6A	-0.236209	0.0120918
ENSG00000149269.5	PAK1	0.1956	0.0121636
ENSG00000100029.13	PES1	-0.348391	0.0121985
ENSG00000109390.7	NDUFC1	-0.238935	0.0121985
ENSG00000169567.7	HINT1	-0.198117	0.0122306
ENSG00000156049.6	GNA14	0.790551	0.0122847
ENSG00000205726.9	ITSN1	0.210388	0.0123388
ENSG00000176659.5	C20orf197	-0.253198	0.0123451
ENSG00000213799.6	ZNF845	-0.245904	0.0123533
ENSG00000164332.6	UBLCP1	0.275314	0.0124339
ENSG00000165115.10	KIF27	0.30275	0.0124546
ENSG00000023191.12	RNH1	-0.34284	0.0124957
ENSG00000197329.7	PELI1	0.548728	0.0125387
ENSG00000141480.13	ARRB2	-0.323336	0.0125533
ENSG00000189144.9	ZNF573	-0.359888	0.0125535
ENSG00000142046.10	TMEM91	0.446055	0.0125797
ENSG00000205208.4	C4orf46	-0.269706	0.0126095
ENSG00000168404.8	MLKL	-0.361643	0.0127171
ENSG00000186468.8	RPS23	-0.212262	0.0127171
ENSG00000177150.8	FAM210A	-0.224975	0.0127277
ENSG00000085982.9	USP40	0.181927	0.0127367
ENSG00000143889.11	HNRNPLL	0.187699	0.0127459
ENSG00000100335.8	MIEF1	-0.28484	0.0127536
ENSG00000165644.6	COMTD1	-0.544881	0.012812
ENSG00000108848.11	LUC7L3	0.162555	0.0128282
ENSG00000164897.8	TMUB1	-0.287863	0.0128519
ENSG00000105926.11	MPP6	-0.336786	0.0128875
ENSG00000161714.7	PLCD3	0.427764	0.0128875
ENSG00000146281.5	PM20D2	-0.330191	0.0129198
ENSG00000110876.8	SELPLG	-0.545609	0.0129351
ENSG00000136826.10	KLF4	0.525956	0.0129351
ENSG00000149547.10	EI24	-0.26683	0.0129351
ENSG00000170348.4	TMED10	-0.211783	0.0129564
ENSG00000100263.9	RHBDD3	-0.307844	0.0130309
ENSG00000171421.8	MRPL36	-0.401711	0.0130595
ENSG00000168259.10	DNAJC7	-0.21905	0.013099
ENSG00000104324.11	CPQ	0.224632	0.0131338
ENSG00000198771.6	RCSD1	-0.280885	0.0131363
ENSG00000106948.12	AKNA	-0.295719	0.0131395
ENSG00000204960.5	BLACE	-1.26007	0.0131395
ENSG00000187605.11	TET3	-0.242808	0.0131957
ENSG00000166887.11	VPS39	0.160967	0.0132969
ENSG00000214717.5	ZBED1	-0.230572	0.0133285
ENSG00000138080.9	EMILIN1	-0.486724	0.0133895
ENSG00000112308.8	C6orf62	0.112476	0.0134558
ENSG00000092964.12	DPYSL2	-0.25423	0.0134577
ENSG00000099875.10	MKNK2	0.253478	0.0135001
ENSG00000181965.4	NEUROG1	-1.39755	0.0135241
ENSG00000125733.13	TRIP10	0.191771	0.0136108
ENSG00000140564.6	FURIN	-0.211436	0.0136673
ENSG00000149357.5	LAMTOR1	-0.26481	0.0136705
ENSG00000197498.8	RPF2	-0.217413	0.0136705
ENSG00000173166.13	RAPH1	0.766294	0.0136997
ENSG00000091106.14	NLRC4	-0.673099	0.0137506
ENSG00000008056.8	SYN1	0.897532	0.0138289
ENSG00000108264.12	TADA2A	0.193252	0.0138289
ENSG00000116266.6	STXBP3	0.250754	0.0138289
ENSG00000107937.14	GTPBP4	-0.213285	0.013834
ENSG00000160013.4	PTGIR	-0.368302	0.013834
ENSG00000105202.3	FBL	-0.351172	0.0138655
ENSG00000145428.10	RNF175	-0.492071	0.0138929
ENSG00000088836.8	SLC4A11	-0.208582	0.0139517
ENSG00000104974.6	LILRA1	0.331598	0.0139748
ENSG00000058404.15	CAMK2B	-0.961302	0.0139764
ENSG00000172954.9	LCLAT1	-0.217438	0.0140046
ENSG00000188554.9	NBR1	0.167116	0.0140273
ENSG00000197905.4	TEAD4	-0.54918	0.0140375
ENSG00000178695.4	KCTD12	0.405187	0.0140443
ENSG00000164182.6	NDUFAF2	-0.369182	0.0141318
ENSG00000135363.7	LMO2	0.222943	0.0141999
ENSG00000184076.10	UQCR10	-0.427976	0.0141999
ENSG00000185090.10	MANEAL	-0.384364	0.0142293
ENSG00000214367.3	HAUS3	0.272426	0.0142295
ENSG00000166546.9	BEAN1	-0.590972	0.0144699
ENSG00000173915.8	USMG5	-0.239984	0.0144699
ENSG00000116698.16	SMG7	-0.159818	0.0144923
ENSG00000075303.8	SLC25A40	0.284688	0.0145242
ENSG00000135549.10	PKIB	-0.428949	0.0145477
ENSG00000147168.8	IL2RG	-0.457742	0.014588
ENSG00000119185.8	ITGB1BP1	-0.211225	0.0145898
ENSG00000156026.10	MCU	0.178806	0.014727
ENSG00000108854.11	SMURF2	0.223826	0.0147982
ENSG00000135069.9	PSAT1	-0.24624	0.0148004
ENSG00000004660.10	CAMKK1	-0.284868	0.0148317
ENSG00000154319.10	FAM167A	-0.795594	0.0148334
ENSG00000198816.5	ZNF358	-0.427858	0.0148739
ENSG00000010810.13	FYN	0.662883	0.0148885
ENSG00000027697.8	IFNGR1	0.247556	0.0148885
ENSG00000117305.10	HMGCL	0.25886	0.0148885
ENSG00000143178.8	TBX19	0.514153	0.0148885
ENSG00000008405.7	CRY1	0.242243	0.0151331
ENSG00000117153.11	KLHL12	0.159425	0.0151399
ENSG00000160075.10	SSU72	-0.305967	0.0151442
ENSG00000111845.4	PAK1IP1	-0.307771	0.0151594
ENSG00000178021.9	TSPYL6	1.70393	0.0151997
ENSG00000100211.6	CBY1	0.445807	0.0152028
ENSG00000120645.7	IQSEC3	-1.39218	0.0152518
ENSG00000138834.8	MAPK8IP3	0.223893	0.0152592
ENSG00000138032.16	PPM1B	0.169005	0.0152632
ENSG00000218672.1	AC008060.7	-0.433866	0.0152832
ENSG00000047648.17	ARHGAP6	-0.643197	0.0153451
ENSG00000153933.5	DGKE	0.24144	0.0153547
ENSG00000179271.1	GADD45GIP1	-0.528727	0.0153547
ENSG00000013374.11	NUB1	0.207538	0.0153573
ENSG00000109572.9	CLCN3	0.209	0.0154146
ENSG00000172878.9	METAP1D	-0.308724	0.0154578
ENSG00000143315.5	PIGM	0.208975	0.0154707
ENSG00000168003.12	SLC3A2	-0.260452	0.0154707
ENSG00000175262.10	C1orf127	-0.915503	0.0155575
ENSG00000118193.7	KIF14	-0.214469	0.0155686
ENSG00000055483.15	USP36	-0.263572	0.0156167
ENSG00000133112.12	TPT1	0.217707	0.0156294
ENSG00000108389.5	MTMR4	-0.20496	0.0156975
ENSG00000100462.11	PRMT5	-0.349555	0.0158051
ENSG00000124508.12	BTN2A2	-0.285236	0.0158655
ENSG00000117395.6	EBNA1BP2	-0.296177	0.0158673
ENSG00000047578.8	KIAA0556	0.170021	0.0158746
ENSG00000141376.16	BCAS3	0.231212	0.0158746
ENSG00000151079.6	KCNA6	-1.28258	0.0159148
ENSG00000164253.8	WDR41	-0.196321	0.0159148
ENSG00000234545.3	FAM133B	0.251451	0.0159148
ENSG00000148444.11	COMMD3	0.357784	0.0159722
ENSG00000178665.10	ZNF713	0.56309	0.0160219
ENSG00000170248.9	PDCD6IP	0.147894	0.0161245
ENSG00000150867.9	PIP4K2A	0.17344	0.0162215
ENSG00000142156.10	COL6A1	-0.343411	0.016255
ENSG00000118007.8	STAG1	-0.165242	0.0162739
ENSG00000182319.5	SGK223	-0.317305	0.0162739
ENSG00000130731.11	C16orf13	-0.473068	0.0163806
ENSG00000131668.9	BARX1	-0.977877	0.0164234
ENSG00000169136.4	ATF5	-0.304028	0.0164234
ENSG00000111897.6	SERINC1	0.244076	0.0164326
ENSG00000162517.8	PEF1	-0.230958	0.016454
ENSG00000099331.9	MYO9B	0.203784	0.0164587
ENSG00000165240.13	ATP7A	0.352192	0.0164811
ENSG00000185522.4	C11orf35	0.642612	0.0164811
ENSG00000143947.8	RPS27A	-0.236311	0.016627
ENSG00000164465.14	DCBLD1	0.209305	0.016627
ENSG00000169032.5	MAP2K1	0.173813	0.0166787
ENSG00000188163.6	FAM166A	1.13488	0.0166998
ENSG00000116678.14	LEPR	0.652363	0.0167518
ENSG00000156050.4	FAM161B	0.398619	0.0167518
ENSG00000163811.7	WDR43	-0.230257	0.0167518
ENSG00000164463.8	CREBRF	0.263631	0.0167518
ENSG00000111237.14	VPS29	0.202742	0.0167687
ENSG00000188603.12	CLN3	-0.537761	0.0168021
ENSG00000173214.5	KIAA1919	0.206901	0.0168097
ENSG00000244509.3	APOBEC3C	-0.280988	0.0168097
ENSG00000071243.11	ING3	0.200835	0.0168313
ENSG00000110328.5	GALNT18	-0.374818	0.0168313
ENSG00000113248.3	PCDHB15	1.4719	0.0168313
ENSG00000163002.8	NUP35	-0.232872	0.0168585
ENSG00000133706.13	LARS	-0.175072	0.0169142
ENSG00000180066.5	C10orf91	-0.790653	0.0169682
ENSG00000146094.9	DOK3	-0.31874	0.0169829
ENSG00000163785.8	RYK	0.302287	0.0170189
ENSG00000091592.11	NLRP1	0.266072	0.0170401
ENSG00000099800.3	TIMM13	-0.401948	0.017044
ENSG00000125347.9	IRF1	0.197198	0.0170503
ENSG00000166126.6	AMN	-0.351785	0.0170869
ENSG00000164362.14	TERT	-0.564048	0.017118
ENSG00000165283.11	STOML2	-0.310644	0.0171947
ENSG00000112787.8	FBRSL1	-0.331172	0.0173616
ENSG00000042832.7	TG	0.614547	0.0173892
ENSG00000125821.7	DTD1	-0.313046	0.0173919
ENSG00000176946.7	THAP4	-0.351712	0.0173919
ENSG00000182700.3	IGIP	0.395619	0.0173919
ENSG00000162929.9	KIAA1841	0.40257	0.0173979
ENSG00000071051.9	NCK2	-0.190594	0.0174294
ENSG00000131437.11	KIF3A	0.313187	0.0174351
ENSG00000050730.11	TNIP3	-1.1311	0.0174896
ENSG00000115318.7	LOXL3	-0.365201	0.0176188
ENSG00000183386.5	FHL3	-0.655188	0.0176188
ENSG00000084693.11	AGBL5	-0.248336	0.0176761
ENSG00000196839.8	ADA	-0.336445	0.0177045
ENSG00000125864.7	BFSP1	-0.525793	0.0177186
ENSG00000157212.14	PAXIP1	-0.225208	0.0177372
ENSG00000155760.1	FZD7	0.454922	0.0177477
ENSG00000179057.9	IGSF22	1.90655	0.0177477
ENSG00000110274.10	CEP164	0.274211	0.0177535
ENSG00000139197.6	PEX5	-0.216636	0.0177971
ENSG00000111144.5	LTA4H	0.266323	0.0178164
ENSG00000096060.10	FKBP5	-0.178703	0.0178208
ENSG00000180346.2	TIGD2	0.273819	0.0178484
ENSG00000060138.8	YBX3	-0.228724	0.0178496
ENSG00000197355.6	UAP1L1	-0.305459	0.0178599
ENSG00000066933.11	MYO9A	0.216669	0.0179363
ENSG00000150337.9	FCGR1A	0.320779	0.0179865
ENSG00000096717.7	SIRT1	0.259446	0.0181096
ENSG00000154957.9	ZNF18	0.259952	0.0181096
ENSG00000073792.11	IGF2BP2	-0.21608	0.0182428
ENSG00000005955.8	GGNBP2	0.159953	0.0182443
ENSG00000143575.10	HAX1	-0.233527	0.0182443
ENSG00000196981.2	WDR5B	0.227939	0.0182443
ENSG00000204852.11	TCTN1	0.327493	0.0182513
ENSG00000158470.5	B4GALT5	-0.163917	0.0182525
ENSG00000197776.3	KLHDC1	0.497504	0.0182999
ENSG00000159199.9	ATP5G1	-0.336384	0.0183062
ENSG00000124574.10	ABCC10	0.233251	0.0184939
ENSG00000113658.12	SMAD5	0.218582	0.018496
ENSG00000102699.5	PARP4	0.118265	0.018502
ENSG00000149150.4	SLC43A1	-0.372158	0.018502
ENSG00000078747.8	ITCH	0.199055	0.0185486
ENSG00000162104.5	ADCY9	0.203183	0.0185486
ENSG00000077809.8	GTF2I	-0.144138	0.0185938
ENSG00000126106.9	TMEM53	-0.28015	0.0186128
ENSG00000137038.7	TMEM261	-0.269904	0.0186129
ENSG00000107738.15	C10orf54	0.257043	0.0186573
ENSG00000019582.10	CD74	-0.313914	0.0186905
ENSG00000155229.16	MMS19	-0.165253	0.0187765
ENSG00000051009.6	FAM160A2	0.261981	0.0188274
ENSG00000166949.11	SMAD3	0.174186	0.0188459
ENSG00000115841.15	RMDN2	0.518058	0.018863
ENSG00000120798.12	NR2C1	0.214398	0.018863
ENSG00000014919.8	COX15	0.153654	0.018882
ENSG00000197056.5	ZMYM1	0.22515	0.0188945
ENSG00000174501.10	ANKRD36C	-0.203478	0.0189252
ENSG00000181315.6	ZNF322	0.284384	0.0190393
ENSG00000215784.4	FAM72D	-0.373683	0.0190415
ENSG00000089220.4	PEBP1	-0.305772	0.0192322
ENSG00000100902.6	PSMA6	-0.330542	0.0192322
ENSG00000112697.11	TMEM30A	0.213544	0.0192947
ENSG00000147996.12	CBWD5	-0.360071	0.0193274
ENSG00000113448.12	PDE4D	-0.409989	0.0193542
ENSG00000180336.13	C17orf104	-0.641692	0.0193905
ENSG00000129566.8	TEP1	0.14808	0.0194374
ENSG00000134152.6	KATNBL1	0.248641	0.0194374
ENSG00000117139.12	KDM5B	-0.132306	0.0195083
ENSG00000165983.10	PTER	0.210818	0.0195342
ENSG00000121073.9	SLC35B1	-0.253266	0.0196279
ENSG00000170473.12	WIBG	-0.279848	0.0196337
ENSG00000083454.17	P2RX5	-0.933034	0.0198653
ENSG00000117222.9	RBBP5	0.177991	0.0198653
ENSG00000176102.7	CSTF3	-0.176207	0.0198653
ENSG00000100422.9	CERK	-0.178629	0.0198892
ENSG00000134460.11	IL2RA	-1.46552	0.0199913
ENSG00000183735.5	TBK1	0.203766	0.020099
ENSG00000182180.9	MRPS16	-0.231519	0.0201133
ENSG00000125257.9	ABCC4	-0.242585	0.0202554
ENSG00000142512.10	SIGLEC10	0.396749	0.0202554
ENSG00000111906.13	HDDC2	-0.18147	0.0202577
ENSG00000106392.6	C1GALT1	0.291059	0.0203005
ENSG00000136870.6	ZNF189	-0.154192	0.0203005
ENSG00000169905.8	TOR1AIP2	0.150205	0.0203005
ENSG00000100197.16	CYP2D6	0.420817	0.0203215
ENSG00000172113.4	NME6	-0.266045	0.0203215
ENSG00000126457.16	PRMT1	-0.418611	0.0203531
ENSG00000181061.9	HIGD1A	0.268974	0.0203617
ENSG00000140836.10	ZFHX3	0.367134	0.0203929
ENSG00000179115.6	FARSA	-0.355203	0.0204027
ENSG00000171703.12	TCEA2	-0.289609	0.0207095
ENSG00000188921.12	PTPLAD2	0.273243	0.0207095
ENSG00000168268.6	NT5DC2	-0.373766	0.0207582
ENSG00000091039.12	OSBPL8	0.191983	0.0207649
ENSG00000136936.6	XPA	0.224343	0.0207865
ENSG00000100439.6	ABHD4	0.44599	0.0207988
ENSG00000065457.6	ADAT1	0.262407	0.0208106
ENSG00000110917.3	MLEC	-0.217032	0.0208119
ENSG00000130511.11	SSBP4	-0.334863	0.02084
ENSG00000114626.13	ABTB1	0.319478	0.0209822
ENSG00000186862.13	PDZD7	-0.310313	0.0209822
ENSG00000014824.9	SLC30A9	0.162261	0.0209978
ENSG00000142149.4	HUNK	-0.55169	0.0209978
ENSG00000167112.7	TRUB2	-0.296954	0.0209978
ENSG00000100285.9	NEFH	-0.452065	0.0209986
ENSG00000138442.5	WDR12	-0.206948	0.0211651
ENSG00000136874.6	STX17	0.330541	0.0211701
ENSG00000170571.7	EMB	-0.223587	0.0211733
ENSG00000123358.15	NR4A1	-0.645256	0.021231
ENSG00000166928.6	MS4A14	-0.585084	0.0212538
ENSG00000174839.8	DENND6A	0.194823	0.0212538
ENSG00000006831.9	ADIPOR2	0.165429	0.021286
ENSG00000175063.12	UBE2C	-0.386259	0.0213123
ENSG00000115540.10	MOB4	0.286188	0.0213378
ENSG00000162851.6	TFB2M	-0.228353	0.0213456
ENSG00000175215.5	CTDSP2	0.154464	0.0213772
ENSG00000179409.6	GEMIN4	-0.281534	0.0213772
ENSG00000118640.6	VAMP8	-0.32623	0.0213849
ENSG00000169621.5	APLF	0.395732	0.0213849
ENSG00000146021.10	KLHL3	0.538014	0.0214839
ENSG00000214013.5	GANC	-0.223871	0.0215232
ENSG00000124098.9	FAM210B	0.271718	0.0215281
ENSG00000106346.7	USP42	-0.214551	0.0215562
ENSG00000136560.9	TANK	0.199906	0.0215606
ENSG00000172007.5	RAB33B	0.321177	0.0215606
ENSG00000048052.17	HDAC9	-0.343035	0.0216966
ENSG00000155085.11	AK9	0.442025	0.0217477
ENSG00000181163.9	NPM1	-0.227825	0.0217517
ENSG00000173890.12	GPR160	-0.558838	0.0217628
ENSG00000198339.3	HIST1H4I	-0.538989	0.0217632
ENSG00000166135.9	HIF1AN	0.169217	0.0217692
ENSG00000187840.4	EIF4EBP1	-0.460513	0.0220012
ENSG00000151726.9	ACSL1	0.246445	0.0220932
ENSG00000106263.13	EIF3B	-0.284796	0.0221763
ENSG00000066027.7	PPP2R5A	0.144051	0.0222246
ENSG00000109320.7	NFKB1	0.176884	0.0222246
ENSG00000112667.8	DNPH1	-0.430897	0.0222246
ENSG00000130150.7	MOSPD2	0.268886	0.0222246
[truncated: 12,805 more rows]

## Sheet: C16+Mivebresib_vs_DMSO
Feature	Feature_gene_name	log2FoldChange	padj
ENSG00000163584.13	RPL22L1	-1.49676	2.93758e-84
ENSG00000166123.9	GPT2	-1.06564	7.23897e-78
ENSG00000115484.10	CCT4	-1.02562	1.44482e-74
ENSG00000147604.9	RPL7	-1.01142	2.4428e-70
ENSG00000070081.11	NUCB2	-0.757556	3.09699e-65
ENSG00000109475.12	RPL34	-0.939327	1.10564e-62
ENSG00000105223.14	PLD3	1.5317	3.63946e-58
ENSG00000146223.10	RPL7L1	-0.877851	9.44223e-58
ENSG00000171791.10	BCL2	-1.13467	2.16916e-57
ENSG00000100448.3	CTSG	-2.51985	2.55007e-56
ENSG00000134419.11	RPS15A	-0.846301	3.38972e-55
ENSG00000117616.13	C1orf63	0.916701	1.06609e-53
ENSG00000089009.11	RPL6	-1.06344	5.84341e-52
ENSG00000135624.11	CCT7	-1.30517	1.38179e-48
ENSG00000136010.9	ALDH1L2	-1.93664	1.01081e-47
ENSG00000171863.8	RPS7	-0.869221	8.37916e-47
ENSG00000119547.5	ONECUT2	-1.13084	9.75934e-47
ENSG00000043143.16	PHF15	-0.863263	6.50332e-46
ENSG00000159388.5	BTG2	0.98471	3.95767e-44
ENSG00000213923.6	CSNK1E	-1.21453	1.46769e-43
ENSG00000064687.8	ABCA7	1.1543	1.77569e-42
ENSG00000017483.10	SLC38A5	-1.94455	8.98706e-42
ENSG00000161681.11	SHANK1	-1.08719	1.16022e-41
ENSG00000164938.9	TP53INP1	1.18862	1.85107e-41
ENSG00000163682.11	RPL9	-0.837502	3.58055e-41
ENSG00000060982.10	BCAT1	-1.11751	3.72088e-40
ENSG00000145425.5	RPS3A	-0.684068	1.27475e-39
ENSG00000124767.6	GLO1	-0.693964	8.16668e-39
ENSG00000120802.9	TMPO	-0.724515	1.92926e-38
ENSG00000111670.10	GNPTAB	0.637629	6.45804e-38
ENSG00000148303.12	RPL7A	-0.994702	1.15613e-37
ENSG00000015171.14	ZMYND11	-0.82024	3.23952e-37
ENSG00000182899.10	RPL35A	-0.960342	5.57481e-37
ENSG00000058804.10	NDC1	-0.684016	7.62768e-37
ENSG00000117724.8	CENPF	-0.957154	2.18394e-36
ENSG00000160200.13	CBS	-1.92504	2.8461e-35
ENSG00000122641.9	INHBA	-3.06008	3.36645e-35
ENSG00000006756.11	ARSD	0.787311	4.33734e-35
ENSG00000122406.8	RPL5	-0.880266	8.00908e-35
ENSG00000118193.7	KIF14	-0.893639	8.60076e-35
ENSG00000004399.8	PLXND1	-1.49226	8.69686e-35
ENSG00000109323.4	MANBA	0.72726	1.73069e-34
ENSG00000101003.8	GINS1	-0.89724	3.98066e-34
ENSG00000144354.9	CDCA7	-0.769338	1.37128e-33
ENSG00000172667.6	ZMAT3	0.963882	4.27833e-33
ENSG00000024526.12	DEPDC1	-0.934717	9.11741e-33
ENSG00000077684.11	PHF17	-0.922988	1.08637e-32
ENSG00000131747.10	TOP2A	-0.857091	7.80976e-32
ENSG00000177485.6	ZBTB33	-0.955198	2.23944e-30
ENSG00000135677.6	GNS	0.634281	2.28787e-30
ENSG00000136824.14	SMC2	-0.759264	3.21127e-30
ENSG00000160447.6	PKN3	-1.19242	4.54952e-30
ENSG00000148154.5	UGCG	-0.515973	4.86166e-30
ENSG00000135069.9	PSAT1	-0.938518	9.28005e-30
ENSG00000138778.7	CENPE	-0.775295	1.7752e-29
ENSG00000040608.9	RTN4R	-1.92543	1.83251e-29
ENSG00000127824.9	TUBA4A	-1.41582	2.69145e-29
ENSG00000169660.11	HEXDC	0.749351	3.61197e-29
ENSG00000253293.3	HOXA10	0.716779	8.50244e-29
ENSG00000125835.13	SNRPB	-0.975318	1.12288e-28
ENSG00000137812.15	CASC5	-0.616844	1.12288e-28
ENSG00000154359.8	LONRF1	-0.808977	1.39496e-28
ENSG00000124151.14	NCOA3	0.800427	1.40534e-28
ENSG00000124614.9	RPS10	-1.55292	2.60355e-28
ENSG00000242732.3	RGAG4	1.21749	1.16064e-27
ENSG00000169896.12	ITGAM	1.47718	2.49191e-27
ENSG00000189091.8	SF3B3	-0.836923	5.70953e-27
ENSG00000168078.5	PBK	-0.773469	6.63494e-27
ENSG00000130723.13	PRRC2B	-0.690585	8.66851e-27
ENSG00000125124.7	BBS2	0.624908	8.70127e-27
ENSG00000167325.10	RRM1	-0.780786	1.20187e-26
ENSG00000109906.9	ZBTB16	-1.6508	1.70636e-26
ENSG00000059804.11	SLC2A3	-1.53122	2.14326e-26
ENSG00000140678.12	ITGAX	1.23153	2.14326e-26
ENSG00000142864.10	SERBP1	-0.719948	2.57106e-26
ENSG00000186638.11	KIF24	-0.727937	2.98062e-26
ENSG00000167703.10	SLC43A2	0.955688	3.03651e-26
ENSG00000117632.16	STMN1	-0.721005	3.4745e-26
ENSG00000092621.7	PHGDH	-1.70621	5.25136e-26
ENSG00000149554.8	CHEK1	-0.582436	7.08071e-26
ENSG00000184575.7	XPOT	-0.617004	7.53363e-26
ENSG00000105810.5	CDK6	-0.54108	8.40991e-26
ENSG00000004809.9	SLC22A16	-1.3994	8.43307e-26
ENSG00000072571.15	HMMR	-0.776959	9.95725e-26
ENSG00000184937.8	WT1	-1.30008	1.06505e-25
ENSG00000170581.9	STAT2	0.712351	2.15361e-25
ENSG00000110925.2	CSRNP2	0.73223	2.336e-25
ENSG00000066279.12	ASPM	-0.712408	4.89635e-25
ENSG00000005381.6	MPO	-1.79912	5.28727e-25
ENSG00000130775.11	THEMIS2	0.828784	5.34918e-25
ENSG00000168685.10	IL7R	-3.30368	9.54936e-25
ENSG00000185818.7	NAT8L	-1.10017	1.04685e-24
ENSG00000143228.8	NUF2	-0.684672	1.98698e-24
ENSG00000101868.6	POLA1	-0.671233	2.00154e-24
ENSG00000162244.6	RPL29	-1.18198	2.11158e-24
ENSG00000156970.8	BUB1B	-1.03192	3.08323e-24
ENSG00000104419.10	NDRG1	0.661661	1.85694e-23
ENSG00000137807.9	KIF23	-0.761588	1.86633e-23
ENSG00000174748.14	RPL15	-0.511776	1.86633e-23
ENSG00000185127.5	C6orf120	0.630243	1.86633e-23
ENSG00000185198.7	PRSS57	-1.55114	2.00092e-23
ENSG00000005249.8	PRKAR2B	1.38754	3.1525e-23
ENSG00000169679.10	BUB1	-0.847211	3.34757e-23
ENSG00000158473.6	CD1D	1.07361	4.4564e-23
ENSG00000050438.12	SLC4A8	1.50255	5.13496e-23
ENSG00000197746.9	PSAP	0.877319	7.80105e-23
ENSG00000114391.8	RPL24	-0.716799	8.07319e-23
ENSG00000169607.8	CKAP2L	-0.751281	8.5629e-23
ENSG00000138821.8	SLC39A8	-0.5849	9.69708e-23
ENSG00000100099.16	HPS4	-0.749591	9.98895e-23
ENSG00000140525.13	FANCI	-0.514308	1.26623e-22
ENSG00000144218.14	AFF3	-1.0066	1.33375e-22
ENSG00000144554.6	FANCD2	-0.663901	1.4288e-22
ENSG00000136104.14	RNASEH2B	-0.543187	3.37322e-22
ENSG00000145386.5	CCNA2	-0.966882	3.7174e-22
ENSG00000163808.12	KIF15	-0.716916	3.82963e-22
ENSG00000132912.8	DCTN4	0.556687	3.8316e-22
ENSG00000162434.7	JAK1	0.494004	3.90991e-22
ENSG00000142731.6	PLK4	-0.646813	4.17701e-22
ENSG00000175832.8	ETV4	-1.2693	5.66382e-22
ENSG00000129173.8	E2F8	-0.806674	8.82214e-22
ENSG00000203666.8	EFCAB2	-0.758843	1.04154e-21
ENSG00000198034.6	RPS4X	-0.69703	1.17687e-21
ENSG00000119866.16	BCL11A	-1.56641	1.3243e-21
ENSG00000156966.6	B3GNT7	-1.05359	1.34015e-21
ENSG00000143476.13	DTL	-0.618454	1.40556e-21
ENSG00000042832.7	TG	1.89691	1.50501e-21
ENSG00000184635.9	ZNF93	-1.0676	1.98884e-21
ENSG00000138160.4	KIF11	-0.623754	2.02072e-21
ENSG00000164587.7	RPS14	-0.872325	2.06913e-21
ENSG00000121064.8	SCPEP1	0.678798	2.2748e-21
ENSG00000153885.10	KCTD15	-0.823391	2.39181e-21
ENSG00000103257.4	SLC7A5	-1.17855	2.68982e-21
ENSG00000143870.8	PDIA6	-0.652397	3.5514e-21
ENSG00000091592.11	NLRP1	0.845569	3.89239e-21
ENSG00000119638.8	NEK9	0.45894	3.89239e-21
ENSG00000040275.12	SPDL1	-0.725811	4.06439e-21
ENSG00000129566.8	TEP1	0.481524	5.21894e-21
ENSG00000086475.10	SEPHS1	-0.763965	5.65657e-21
ENSG00000112701.13	SENP6	-0.474339	6.1229e-21
ENSG00000086200.12	IPO11	-0.605432	6.3029e-21
ENSG00000198520.6	C1orf228	-1.02841	6.72637e-21
ENSG00000184661.9	CDCA2	-0.689729	8.10662e-21
ENSG00000166598.8	HSP90B1	-0.58151	1.42794e-20
ENSG00000080986.8	NDC80	-0.689645	1.45344e-20
ENSG00000088325.11	TPX2	-0.907573	1.79599e-20
ENSG00000147874.6	HAUS6	-0.464571	2.68987e-20
ENSG00000134986.9	NREP	-0.670251	2.7946e-20
ENSG00000164109.9	MAD2L1	-0.664701	2.81151e-20
ENSG00000152056.12	AP1S3	-0.996903	3.30314e-20
ENSG00000170791.13	CHCHD7	0.597462	3.35031e-20
ENSG00000105409.11	ATP1A3	-1.52151	4.2889e-20
ENSG00000034713.3	GABARAPL2	0.547139	4.667e-20
ENSG00000188818.8	ZDHHC11	-1.24338	5.39094e-20
ENSG00000076003.4	MCM6	-0.875883	5.46947e-20
ENSG00000133119.8	RFC3	-0.726866	5.63301e-20
ENSG00000130449.5	ZSWIM6	0.749365	6.82062e-20
ENSG00000172716.12	SLFN11	-0.911485	6.82062e-20
ENSG00000171914.10	TLN2	1.16981	7.27023e-20
ENSG00000197299.6	BLM	-0.572896	1.05635e-19
ENSG00000069482.6	GAL	-2.12084	1.17554e-19
ENSG00000153029.10	MR1	0.642507	1.36874e-19
ENSG00000117289.7	TXNIP	1.22899	1.50058e-19
ENSG00000136161.8	RCBTB2	0.788431	2.00396e-19
ENSG00000106105.9	GARS	-0.652222	2.68397e-19
ENSG00000186767.5	SPIN4	-0.70019	3.07261e-19
ENSG00000187147.13	RNF220	-0.816804	3.07261e-19
ENSG00000265681.2	RPL17	-1.0902	3.07261e-19
ENSG00000102054.13	RBBP7	-0.430712	3.34813e-19
ENSG00000144401.10	METTL21A	-0.59091	3.61492e-19
ENSG00000165480.11	SKA3	-0.890147	3.64371e-19
ENSG00000115232.9	ITGA4	-0.444745	4.14797e-19
ENSG00000146918.15	NCAPG2	-0.679506	4.7165e-19
ENSG00000099958.10	DERL3	-1.07439	4.92553e-19
ENSG00000072274.8	TFRC	-0.435017	5.37497e-19
ENSG00000149328.10	GLB1L2	-1.08265	5.89808e-19
ENSG00000143401.10	ANP32E	-0.675141	6.97973e-19
ENSG00000087053.14	MTMR2	-0.580257	6.99668e-19
ENSG00000110628.9	SLC22A18	1.03104	7.03982e-19
ENSG00000122484.8	RPAP2	0.624508	7.73046e-19
ENSG00000136982.5	DSCC1	-0.676363	8.16082e-19
ENSG00000197343.6	ZNF655	0.542644	9.28546e-19
ENSG00000173546.7	CSPG4	-2.8297	9.4773e-19
ENSG00000166432.10	ZMAT1	1.22537	1.07767e-18
ENSG00000112367.6	FIG4	0.536314	1.26351e-18
ENSG00000140450.7	ARRDC4	1.19215	1.26351e-18
ENSG00000135776.4	ABCB10	-0.80906	1.35951e-18
ENSG00000119711.8	ALDH6A1	0.616169	1.65384e-18
ENSG00000134057.10	CCNB1	-0.935386	1.78759e-18
ENSG00000144136.6	SLC20A1	-0.498637	1.79722e-18
ENSG00000205208.4	C4orf46	-0.796735	1.99191e-18
ENSG00000149273.10	RPS3	-0.728728	2.07021e-18
ENSG00000120694.15	HSPH1	-0.578613	2.28104e-18
ENSG00000164754.8	RAD21	-0.447564	2.41693e-18
ENSG00000070501.7	POLB	0.832398	2.4607e-18
ENSG00000049239.8	H6PD	0.549653	2.96238e-18
ENSG00000189403.10	HMGB1	-0.372265	2.99392e-18
ENSG00000087495.12	PHACTR3	-0.839548	4.67489e-18
ENSG00000197629.5	MPEG1	-1.39834	4.71586e-18
ENSG00000183019.3	C19orf59	-1.34752	5.23755e-18
ENSG00000008294.16	SPAG9	0.392147	5.2969e-18
ENSG00000157456.3	CCNB2	-0.82682	6.86117e-18
ENSG00000182759.3	MAFA	3.236	6.97458e-18
ENSG00000213983.7	AP1G2	0.553893	7.98358e-18
ENSG00000046651.10	OFD1	-0.501405	1.05874e-17
ENSG00000114346.9	ECT2	-0.543686	1.09832e-17
ENSG00000115163.10	CENPA	-0.90592	1.22342e-17
ENSG00000120437.7	ACAT2	-0.712289	1.26632e-17
ENSG00000134824.9	FADS2	-1.46844	1.28765e-17
ENSG00000000460.12	C1orf112	-0.728044	1.35166e-17
ENSG00000100889.7	PCK2	-0.582888	1.39072e-17
ENSG00000115738.5	ID2	0.719209	1.41357e-17
ENSG00000093000.14	NUP50	-0.368628	1.60826e-17
ENSG00000125944.14	HNRNPR	-0.539854	1.60951e-17
ENSG00000160767.16	FAM189B	-0.905839	1.71116e-17
ENSG00000186834.2	HEXIM1	0.673043	2.03561e-17
ENSG00000063177.8	RPL18	-0.820307	2.05056e-17
ENSG00000114933.11	INO80D	-0.464595	3.14853e-17
ENSG00000113368.7	LMNB1	-0.778648	3.541e-17
ENSG00000060558.3	GNA15	-0.699265	3.74011e-17
ENSG00000171724.2	VAT1L	-1.74423	3.75343e-17
ENSG00000134684.6	YARS	-0.66239	3.77656e-17
ENSG00000117411.12	B4GALT2	-1.05065	3.80318e-17
ENSG00000013364.14	MVP	0.693327	3.82045e-17
ENSG00000161800.8	RACGAP1	-0.722	3.82045e-17
ENSG00000165304.3	MELK	-0.702542	4.0956e-17
ENSG00000163781.8	TOPBP1	-0.538285	4.20929e-17
ENSG00000197756.5	RPL37A	-1.00333	4.20929e-17
ENSG00000187554.7	TLR5	1.48153	4.22434e-17
ENSG00000178773.10	CPNE7	-1.42933	5.04664e-17
ENSG00000198901.9	PRC1	-0.743753	5.22664e-17
ENSG00000178726.6	THBD	-0.962616	5.29841e-17
ENSG00000267041.1	ZNF850	-0.723933	5.36826e-17
ENSG00000230453.5	ANKRD18B	-0.969431	5.73565e-17
ENSG00000165476.8	REEP3	-0.642429	6.09866e-17
ENSG00000112742.5	TTK	-0.641415	7.19974e-17
ENSG00000117650.8	NEK2	-0.730223	8.28663e-17
ENSG00000149485.12	FADS1	-0.97555	9.29846e-17
ENSG00000123360.7	PDE1B	0.801317	1.03976e-16
ENSG00000153044.5	CENPH	-0.75474	1.12503e-16
ENSG00000171241.4	SHCBP1	-0.59461	1.18931e-16
ENSG00000168496.3	FEN1	-0.902219	1.20409e-16
ENSG00000148773.8	MKI67	-1.05274	1.33834e-16
ENSG00000167004.8	PDIA3	-0.384229	1.35286e-16
ENSG00000121807.5	CCR2	-2.78737	1.35386e-16
ENSG00000114686.4	MRPL3	-0.640513	1.35481e-16
ENSG00000087586.13	AURKA	-0.921468	1.39016e-16
ENSG00000152253.4	SPC25	-0.863335	1.45817e-16
ENSG00000005379.11	BZRAP1	-0.79523	1.67407e-16
ENSG00000104093.9	DMXL2	0.50005	1.81736e-16
ENSG00000123473.11	STIL	-0.554258	1.83554e-16
ENSG00000117593.8	DARS2	-0.641062	1.90413e-16
ENSG00000175662.13	TOM1L2	0.547169	1.94368e-16
ENSG00000196081.5	ZNF724P	-0.642987	1.9447e-16
ENSG00000094804.5	CDC6	-0.740075	1.97823e-16
ENSG00000132514.9	CLEC10A	-1.6878	2.00734e-16
ENSG00000099330.4	OCEL1	0.841152	2.1781e-16
ENSG00000044574.7	HSPA5	-0.640668	2.48356e-16
ENSG00000170312.11	CDK1	-0.552516	2.87518e-16
ENSG00000149428.14	HYOU1	-0.747349	2.97774e-16
ENSG00000185760.11	KCNQ5	-1.14007	2.97774e-16
ENSG00000167103.7	PIP5KL1	1.07525	2.98046e-16
ENSG00000263264.1	CTB-133G6.1	-1.08944	3.08141e-16
ENSG00000130590.9	SAMD10	-1.27747	3.08538e-16
ENSG00000164045.7	CDC25A	-0.884095	3.46025e-16
ENSG00000121211.3	MND1	-1.01061	4.0031e-16
ENSG00000174371.12	EXO1	-0.601507	4.06374e-16
ENSG00000089685.10	BIRC5	-0.822218	4.09157e-16
ENSG00000075151.15	EIF4G3	-0.53818	4.21263e-16
ENSG00000256235.1	SMIM3	1.07278	4.24655e-16
ENSG00000033627.10	ATP6V0A1	0.704216	4.47931e-16
ENSG00000063046.13	EIF4B	-0.410134	4.55195e-16
ENSG00000161533.7	ACOX1	0.414069	4.73382e-16
ENSG00000048471.9	SNX29	0.478528	4.88699e-16
ENSG00000123104.7	ITPR2	0.542549	5.23665e-16
ENSG00000180549.7	FUT7	-0.954213	5.34407e-16
ENSG00000006634.3	DBF4	-0.563425	5.62895e-16
ENSG00000166501.8	PRKCB	0.595421	5.779e-16
ENSG00000104970.6	KIR3DX1	-1.86856	6.05843e-16
ENSG00000095002.8	MSH2	-0.579161	6.06039e-16
ENSG00000126787.8	DLGAP5	-0.726391	6.69303e-16
ENSG00000114841.13	DNAH1	0.608837	6.72475e-16
ENSG00000166508.13	MCM7	-0.93203	7.15055e-16
ENSG00000165490.8	C11orf82	-0.722585	7.74361e-16
ENSG00000196305.13	IARS	-0.501044	7.75687e-16
ENSG00000077984.4	CST7	-2.53349	7.86328e-16
ENSG00000109805.5	NCAPG	-0.627195	8.61995e-16
ENSG00000012048.15	BRCA1	-0.712919	8.66577e-16
ENSG00000172809.8	RPL38	-1.07256	9.31954e-16
ENSG00000166295.4	ANAPC16	0.573134	1.00121e-15
ENSG00000152580.8	IGSF10	-1.71907	1.12588e-15
ENSG00000171320.10	ESCO2	-0.509752	1.15369e-15
ENSG00000133104.8	SPG20	-0.366981	1.20066e-15
ENSG00000188641.8	DPYD	0.583228	1.21949e-15
ENSG00000175591.7	P2RY2	-1.04935	1.22199e-15
ENSG00000127022.10	CANX	-0.533562	1.25458e-15
ENSG00000167658.11	EEF2	-0.760248	1.25458e-15
ENSG00000179598.5	PLD6	-0.86363	1.3166e-15
ENSG00000130826.11	DKC1	-0.525453	1.32603e-15
ENSG00000164402.9	SEPT8	-0.600279	1.37502e-15
ENSG00000124207.12	CSE1L	-0.521683	1.43024e-15
ENSG00000012822.11	CALCOCO1	0.649175	1.69555e-15
ENSG00000035499.8	DEPDC1B	-0.658759	1.74828e-15
ENSG00000157212.14	PAXIP1	-0.625703	1.78788e-15
ENSG00000163507.9	KIAA1524	-0.495639	1.92965e-15
ENSG00000105492.11	SIGLEC6	-2.36752	1.97417e-15
ENSG00000178996.8	SNX18	0.529732	1.97417e-15
ENSG00000198554.7	WDHD1	-0.545227	2.021e-15
ENSG00000137168.7	PPIL1	-0.550669	2.05055e-15
ENSG00000144713.8	RPL32	-0.87288	2.15543e-15
ENSG00000127415.8	IDUA	0.681151	2.16354e-15
ENSG00000164877.14	MICALL2	0.654738	2.58073e-15
ENSG00000142937.7	RPS8	-0.594028	2.72199e-15
ENSG00000137804.8	NUSAP1	-0.717729	2.77845e-15
ENSG00000142197.8	DOPEY2	0.49519	2.85011e-15
ENSG00000139514.8	SLC7A1	-0.752227	3.32114e-15
ENSG00000100749.3	VRK1	-0.533032	3.54754e-15
ENSG00000099194.5	SCD	-1.03049	3.73671e-15
ENSG00000099785.6	MARCH2	0.775416	4.04374e-15
ENSG00000156802.8	ATAD2	-0.477606	4.35356e-15
ENSG00000051341.9	POLQ	-0.651133	4.51776e-15
ENSG00000152620.8	NADK2	-0.551621	4.83152e-15
ENSG00000197694.9	SPTAN1	0.505821	4.99298e-15
ENSG00000205476.4	CCDC85C	-0.606846	5.46278e-15
ENSG00000172954.9	LCLAT1	-0.581434	5.67688e-15
ENSG00000112984.7	KIF20A	-0.989169	5.72792e-15
ENSG00000100284.16	TOM1	0.556569	6.14315e-15
ENSG00000197771.8	MCMBP	-0.372559	7.65658e-15
ENSG00000112343.8	TRIM38	0.657346	8.08395e-15
ENSG00000254726.2	MEX3A	-1.38789	8.22834e-15
ENSG00000175063.12	UBE2C	-1.07064	8.24911e-15
ENSG00000079387.9	SENP1	-0.549583	8.61508e-15
ENSG00000205784.2	ARRDC5	2.404	8.72771e-15
ENSG00000111247.10	RAD51AP1	-0.550059	9.00929e-15
ENSG00000139734.13	DIAPH3	-0.625066	9.2507e-15
ENSG00000138326.14	RPS24	-0.850518	9.36387e-15
ENSG00000113742.8	CPEB4	0.700582	9.76388e-15
ENSG00000166851.10	PLK1	-1.08314	9.8031e-15
ENSG00000156052.6	GNAQ	-0.641755	1.00116e-14
ENSG00000183307.3	CECR6	-0.726391	1.032e-14
ENSG00000129810.10	SGOL1	-0.737198	1.06441e-14
ENSG00000072210.14	ALDH3A2	0.660758	1.11417e-14
ENSG00000142945.8	KIF2C	-0.790746	1.15806e-14
ENSG00000162607.8	USP1	-0.425778	1.16664e-14
ENSG00000254087.3	LYN	0.432742	1.18597e-14
ENSG00000101945.12	SUV39H1	-1.0021	1.19796e-14
ENSG00000256229.3	ZNF486	-0.943434	1.20704e-14
ENSG00000177732.6	SOX12	-0.912602	1.21264e-14
ENSG00000100526.15	CDKN3	-0.724962	1.32332e-14
ENSG00000139618.10	BRCA2	-0.472647	1.54025e-14
ENSG00000035141.3	FAM136A	-0.662054	1.63227e-14
ENSG00000136854.13	STXBP1	0.647051	1.72562e-14
ENSG00000128050.4	PAICS	-0.730544	1.74592e-14
ENSG00000100596.2	SPTLC2	-0.308475	1.83796e-14
ENSG00000165244.6	ZNF367	-0.688157	1.99017e-14
ENSG00000134644.11	PUM1	-0.36627	2.02285e-14
ENSG00000073111.9	MCM2	-0.989258	2.25174e-14
ENSG00000161217.7	PCYT1A	0.403853	2.27092e-14
ENSG00000130518.12	KIAA1683	1.05244	2.31547e-14
ENSG00000147155.6	EBP	-0.819156	2.42236e-14
ENSG00000070950.5	RAD18	-0.600627	2.446e-14
ENSG00000178921.9	PFAS	-0.770792	2.47817e-14
ENSG00000171812.6	COL8A2	-1.07483	2.60225e-14
ENSG00000126259.15	KIRREL2	-1.09515	2.60635e-14
ENSG00000183688.4	FAM101B	-0.566845	2.87341e-14
ENSG00000101188.4	NTSR1	-1.24676	3.00122e-14
ENSG00000111790.9	FGFR1OP2	0.498555	3.1904e-14
ENSG00000205221.8	VIT	-2.81495	3.30696e-14
ENSG00000127528.5	KLF2	1.5134	3.52602e-14
ENSG00000198408.9	MGEA5	0.500248	3.5344e-14
ENSG00000127663.10	KDM4B	0.448933	3.62749e-14
ENSG00000189308.6	LIN54	-0.510957	4.01985e-14
ENSG00000068489.8	PRR11	-0.705261	4.07956e-14
ENSG00000068831.14	RASGRP2	-0.7765	4.81624e-14
ENSG00000163535.13	SGOL2	-0.580259	4.86088e-14
ENSG00000197142.6	ACSL5	-0.892953	4.86088e-14
ENSG00000151725.7	MLF1IP	-0.521434	5.12113e-14
ENSG00000205592.9	MUC19	-0.897214	5.4906e-14
ENSG00000096060.10	FKBP5	-0.469396	5.67118e-14
ENSG00000198879.7	SFMBT2	-0.520805	5.72676e-14
ENSG00000113070.6	HBEGF	0.864497	5.78449e-14
ENSG00000169750.4	RAC3	-1.25969	6.0233e-14
ENSG00000113532.8	ST8SIA4	-0.455457	6.16994e-14
ENSG00000133121.16	STARD13	-1.49839	6.21963e-14
ENSG00000177119.11	ANO6	0.44056	6.22879e-14
ENSG00000065328.12	MCM10	-0.744406	6.23919e-14
ENSG00000090861.11	AARS	-0.679778	6.23919e-14
ENSG00000100297.11	MCM5	-1.02462	6.98991e-14
ENSG00000110324.5	IL10RA	0.716938	7.73753e-14
ENSG00000196591.7	HDAC2	-0.357143	7.8424e-14
ENSG00000065989.11	PDE4A	-0.909722	8.0749e-14
ENSG00000121621.6	KIF18A	-0.536887	8.20998e-14
ENSG00000089847.8	ANKRD24	1.19146	8.22996e-14
ENSG00000111206.8	FOXM1	-1.03049	8.22996e-14
ENSG00000130707.13	ASS1	-0.744507	8.29062e-14
ENSG00000108001.9	EBF3	-0.872294	8.55679e-14
ENSG00000134802.13	SLC43A3	-0.64796	9.26348e-14
ENSG00000170325.10	PRDM10	-0.63246	9.52467e-14
ENSG00000211455.3	STK38L	0.767809	9.68427e-14
ENSG00000155858.5	LSM11	-0.705689	9.79649e-14
ENSG00000197019.4	SERTAD1	0.779265	1.03678e-13
ENSG00000184465.11	WDR27	0.752003	1.09275e-13
ENSG00000120063.5	GNA13	-0.376004	1.11503e-13
ENSG00000137259.2	HIST1H2AB	-1.27483	1.12495e-13
ENSG00000145287.6	PLAC8	-0.842017	1.20703e-13
ENSG00000198918.7	RPL39	-0.520713	1.33225e-13
ENSG00000145050.11	MANF	-0.726745	1.50681e-13
ENSG00000155561.10	NUP205	-0.536432	1.55106e-13
ENSG00000131469.8	RPL27	-1.13102	1.63856e-13
ENSG00000117407.12	ARTN	1.02312	1.65611e-13
ENSG00000129667.8	RHBDF2	0.484081	1.66879e-13
ENSG00000135476.7	ESPL1	-0.89651	1.66879e-13
ENSG00000112312.5	GMNN	-0.561562	1.74188e-13
ENSG00000156876.8	SASS6	-0.650674	1.76321e-13
ENSG00000109881.12	CCDC34	-0.693053	1.7696e-13
ENSG00000130255.8	RPL36	-1.29589	2.02415e-13
ENSG00000171208.5	NETO2	-0.46066	2.0968e-13
ENSG00000169397.3	RNASE3	-1.61502	2.13218e-13
ENSG00000109084.9	TMEM97	-0.763501	2.26977e-13
ENSG00000090238.7	YPEL3	0.980847	2.30626e-13
ENSG00000070814.13	TCOF1	-0.78018	2.31648e-13
ENSG00000109685.13	WHSC1	-0.672863	2.37567e-13
ENSG00000179855.5	GIPC3	-1.91518	2.46521e-13
ENSG00000100714.11	MTHFD1	-0.767495	2.48628e-13
ENSG00000171848.9	RRM2	-0.597986	2.48628e-13
ENSG00000196374.5	HIST1H2BM	-1.40743	2.50091e-13
ENSG00000173511.5	VEGFB	-0.837439	2.55796e-13
ENSG00000124635.7	HIST1H2BJ	-0.986491	2.5912e-13
ENSG00000189298.9	ZKSCAN3	0.542477	2.68094e-13
ENSG00000182168.10	UNC5C	-0.584565	2.78631e-13
ENSG00000162073.9	PAQR4	-0.749163	2.8968e-13
ENSG00000120008.11	WDR11	0.361139	3.14171e-13
ENSG00000136518.12	ACTL6A	-0.394554	3.15279e-13
ENSG00000084710.9	EFR3B	2.2494	3.17914e-13
ENSG00000196187.7	TMEM63A	0.449556	3.32464e-13
ENSG00000102384.9	CENPI	-0.593018	3.36154e-13
ENSG00000083720.8	OXCT1	-0.459633	3.40883e-13
ENSG00000196890.3	HIST3H2BB	-1.67118	3.40883e-13
ENSG00000136942.10	RPL35	-0.911965	3.54477e-13
ENSG00000215784.4	FAM72D	-0.992321	3.5586e-13
ENSG00000064547.9	LPAR2	0.69726	3.72829e-13
ENSG00000121417.9	ZNF211	0.608541	3.91821e-13
ENSG00000196743.4	GM2A	0.453524	4.07392e-13
ENSG00000185379.16	RAD51D	-0.813405	4.16096e-13
ENSG00000079462.3	PAFAH1B3	-0.845954	4.28569e-13
ENSG00000163947.7	ARHGEF3	0.501386	4.39471e-13
ENSG00000167528.8	ZNF641	0.57877	4.42511e-13
ENSG00000129824.11	RPS4Y1	-0.619278	4.58834e-13
ENSG00000115839.13	RAB3GAP1	0.492116	4.63509e-13
ENSG00000138834.8	MAPK8IP3	0.550875	4.97098e-13
ENSG00000079246.11	XRCC5	-0.396511	5.37871e-13
ENSG00000146281.5	PM20D2	-0.802019	5.46178e-13
ENSG00000104738.12	MCM4	-0.736925	5.4999e-13
ENSG00000196331.5	HIST1H2BO	-1.12032	5.4999e-13
ENSG00000168538.11	TRAPPC11	0.404409	5.84264e-13
ENSG00000182481.4	KPNA2	-0.640795	6.33029e-13
ENSG00000131650.9	KREMEN2	-1.23808	6.95559e-13
ENSG00000110079.12	MS4A4A	-1.03599	7.05954e-13
ENSG00000176208.4	ATAD5	-0.509798	7.55705e-13
ENSG00000147145.8	LPAR4	-1.96717	7.60894e-13
ENSG00000131171.8	SH3BGRL	0.474381	7.78276e-13
ENSG00000181418.7	DDN	-2.90118	8.21486e-13
ENSG00000113407.9	TARS	-0.363152	8.63059e-13
ENSG00000178878.8	APOLD1	0.652255	8.89531e-13
ENSG00000136732.10	GYPC	-2.01862	9.18059e-13
ENSG00000166436.11	TRIM66	0.571263	9.18059e-13
ENSG00000115268.5	RPS15	-0.868182	9.43142e-13
ENSG00000010803.12	SCMH1	-0.603099	9.45142e-13
ENSG00000127084.13	FGD3	0.578506	9.47505e-13
ENSG00000076382.12	SPAG5	-0.751269	9.47833e-13
ENSG00000205937.7	RNPS1	-0.59896	9.67368e-13
ENSG00000145214.9	DGKQ	0.52416	1.01772e-12
ENSG00000071082.6	RPL31	-0.731361	1.09698e-12
ENSG00000178752.11	FAM132B	-1.4262	1.10378e-12
ENSG00000155660.6	PDIA4	-0.632792	1.1173e-12
ENSG00000196531.6	NACA	-0.593526	1.12576e-12
ENSG00000101307.11	SIRPB1	-0.707606	1.21742e-12
ENSG00000128944.9	KNSTRN	-0.857612	1.22086e-12
ENSG00000084234.12	APLP2	0.374651	1.24574e-12
ENSG00000163975.7	MFI2	-0.685286	1.29668e-12
ENSG00000101057.11	MYBL2	-1.11276	1.3498e-12
ENSG00000011426.6	ANLN	-0.454648	1.38221e-12
ENSG00000138180.11	CEP55	-0.588251	1.40531e-12
ENSG00000103657.9	HERC1	0.383036	1.4112e-12
ENSG00000156239.7	N6AMT1	0.696268	1.42198e-12
ENSG00000100427.11	MLC1	-0.746052	1.45101e-12
ENSG00000188177.9	ZC3H6	0.553924	1.5213e-12
ENSG00000075240.12	GRAMD4	-0.609549	1.53718e-12
ENSG00000124795.10	DEK	-0.411252	1.53957e-12
ENSG00000125691.8	RPL23	-0.651771	1.53957e-12
ENSG00000145882.6	PCYOX1L	0.53673	1.53957e-12
ENSG00000114626.13	ABTB1	0.796082	1.56987e-12
ENSG00000104635.9	SLC39A14	-0.61338	1.59404e-12
ENSG00000111196.5	MAGOHB	-0.535601	1.59404e-12
ENSG00000163002.8	NUP35	-0.578611	1.59404e-12
ENSG00000198826.6	ARHGAP11A	-0.423963	1.63156e-12
ENSG00000060749.10	QSER1	-0.448018	1.68534e-12
ENSG00000197697.3	HIST1H2BE	-1.30638	1.87404e-12
ENSG00000106070.13	GRB10	-0.750004	1.90784e-12
ENSG00000029993.10	HMGB3	-0.670856	2.10394e-12
ENSG00000151876.8	FBXO4	-0.593578	2.16494e-12
ENSG00000156509.9	FBXO43	-0.782655	2.28852e-12
ENSG00000196663.11	TECPR2	0.445728	2.36381e-12
ENSG00000088854.11	C20orf194	0.316849	2.54903e-12
ENSG00000131153.4	GINS2	-0.662358	2.63406e-12
ENSG00000160131.9	VMA21	-0.414749	2.67942e-12
ENSG00000090889.10	KIF4A	-0.667933	3.08404e-12
ENSG00000120334.11	CENPL	-0.675974	3.36939e-12
ENSG00000169710.6	FASN	-0.911075	3.47056e-12
ENSG00000145604.11	SKP2	-0.577215	3.65173e-12
ENSG00000117399.9	CDC20	-0.940123	3.74415e-12
ENSG00000183814.11	LIN9	-0.69939	3.74415e-12
ENSG00000204628.7	GNB2L1	-0.749369	3.74415e-12
ENSG00000125772.8	GPCPD1	0.617773	3.82969e-12
ENSG00000065150.14	IPO5	-0.474417	3.86929e-12
ENSG00000106443.10	PHF14	-0.555806	3.91951e-12
ENSG00000168675.14	LDLRAD4	-1.06294	4.06279e-12
ENSG00000149548.10	CCDC15	-0.678077	4.36731e-12
ENSG00000185920.11	PTCH1	-1.15289	4.38438e-12
ENSG00000147536.7	GINS4	-0.676952	4.39594e-12
ENSG00000010292.8	NCAPD2	-0.666241	4.49802e-12
ENSG00000101782.10	RIOK3	0.533176	4.51789e-12
ENSG00000075420.8	FNDC3B	-0.543216	4.59383e-12
ENSG00000168610.10	STAT3	0.511956	4.7625e-12
ENSG00000173456.4	RNF26	-0.670337	4.76889e-12
ENSG00000080546.9	SESN1	0.583606	4.97644e-12
ENSG00000188243.8	COMMD6	0.477496	5.01068e-12
ENSG00000118007.8	STAG1	-0.395481	5.45905e-12
ENSG00000179294.5	C17orf96	-1.27494	5.59323e-12
ENSG00000198937.8	CCDC167	-1.07364	5.63537e-12
ENSG00000149503.8	INCENP	-0.791767	5.67853e-12
ENSG00000104055.10	TGM5	-1.27066	5.82221e-12
ENSG00000004478.5	FKBP4	-0.880797	5.9864e-12
ENSG00000079819.12	EPB41L2	-0.559053	6.10984e-12
ENSG00000114573.5	ATP6V1A	0.480612	6.17709e-12
ENSG00000101347.7	SAMHD1	0.486972	6.22941e-12
ENSG00000182568.12	SATB1	0.466527	6.24517e-12
ENSG00000179240.4	RP11-111M22.2	0.746255	6.30212e-12
ENSG00000135763.5	URB2	-0.522725	6.59094e-12
ENSG00000003756.12	RBM5	0.30962	7.06899e-12
ENSG00000186871.5	ERCC6L	-0.765	7.06899e-12
ENSG00000170915.8	PAQR8	0.771808	7.2592e-12
ENSG00000137310.7	TCF19	-0.609884	7.84056e-12
ENSG00000108551.4	RASD1	2.15036	8.09931e-12
ENSG00000115457.5	IGFBP2	-0.48682	8.36283e-12
ENSG00000143819.8	EPHX1	0.613491	8.91596e-12
ENSG00000123485.7	HJURP	-0.803745	8.98175e-12
ENSG00000151461.15	UPF2	-0.434521	9.0721e-12
ENSG00000125885.9	MCM8	-0.519607	9.26507e-12
ENSG00000158714.6	SLAMF8	-2.48915	9.31591e-12
ENSG00000184675.5	AMER1	-0.713854	9.34976e-12
ENSG00000198056.9	PRIM1	-0.64733	1.01154e-11
ENSG00000229117.4	RPL41	-0.648265	1.01154e-11
ENSG00000130935.5	NOL11	-0.385599	1.14193e-11
ENSG00000128322.6	IGLL1	-8.03922	1.17995e-11
ENSG00000140534.9	TICRR	-0.737517	1.19253e-11
ENSG00000175643.7	RMI2	-0.532573	1.19253e-11
ENSG00000177272.7	KCNA3	-1.51366	1.20866e-11
ENSG00000135829.12	DHX9	-0.363535	1.24655e-11
ENSG00000123933.10	MXD4	0.527225	1.28851e-11
ENSG00000198720.8	ANKRD13B	-0.931786	1.33884e-11
ENSG00000181908.4	AP003774.4	-1.09243	1.36275e-11
ENSG00000164463.8	CREBRF	0.607881	1.39199e-11
ENSG00000168071.17	CCDC88B	0.758353	1.47241e-11
ENSG00000165732.8	DDX21	-0.550552	1.54198e-11
ENSG00000166881.5	TMEM194A	-0.500449	1.54275e-11
ENSG00000158158.7	CNNM4	0.508111	1.60504e-11
ENSG00000142687.13	KIAA0319L	0.38559	1.66216e-11
ENSG00000162923.10	WDR26	0.348123	1.68764e-11
ENSG00000160752.10	FDPS	-0.561705	1.7629e-11
ENSG00000106785.10	TRIM14	-0.501591	1.81082e-11
ENSG00000104814.8	MAP4K1	-1.09951	1.98033e-11
ENSG00000084110.6	HAL	-1.31821	2.09141e-11
ENSG00000164010.9	ERMAP	0.542606	2.10834e-11
ENSG00000139289.9	PHLDA1	0.937967	2.21852e-11
ENSG00000107738.15	C10orf54	0.604035	2.23699e-11
ENSG00000131042.9	LILRB2	0.962813	2.25314e-11
ENSG00000047597.5	XK	-1.15463	2.28683e-11
ENSG00000071539.9	TRIP13	-0.844345	2.42189e-11
ENSG00000136628.13	EPRS	-0.412018	2.42189e-11
ENSG00000123136.10	DDX39A	-0.807676	2.45264e-11
ENSG00000168003.12	SLC3A2	-0.59933	2.51678e-11
ENSG00000083093.5	PALB2	-0.467977	2.53277e-11
ENSG00000185404.12	SP140L	0.685995	2.71462e-11
ENSG00000146858.7	ZC3HAV1L	-0.573914	2.88548e-11
ENSG00000204634.8	TBC1D8	0.444816	2.98974e-11
ENSG00000108424.5	KPNB1	-0.405998	2.99916e-11
ENSG00000172167.3	MTBP	-0.507683	2.99919e-11
ENSG00000096063.10	SRPK1	-0.405334	3.06492e-11
ENSG00000198150.2	AC135178.1	1.7014	3.10542e-11
ENSG00000100299.13	ARSA	0.484447	3.15081e-11
ENSG00000186193.7	SAPCD2	-0.849015	3.15081e-11
ENSG00000132256.14	TRIM5	0.526278	3.2124e-11
ENSG00000155974.7	GRIP1	-1.01665	3.24574e-11
ENSG00000142856.12	ITGB3BP	-0.521642	3.32727e-11
ENSG00000156931.11	VPS8	0.57435	3.33449e-11
ENSG00000136122.11	BORA	-0.536503	3.55917e-11
ENSG00000177000.6	MTHFR	0.447783	3.562e-11
ENSG00000113569.11	NUP155	-0.472035	3.70246e-11
ENSG00000196226.2	HIST1H2BB	-1.24425	3.77369e-11
ENSG00000198339.3	HIST1H4I	-1.28328	3.78056e-11
ENSG00000081760.12	AACS	0.420925	3.87055e-11
ENSG00000058668.10	ATP2B4	-0.333625	4.16722e-11
ENSG00000101040.15	ZMYND8	-0.384812	4.17956e-11
ENSG00000179218.9	CALR	-0.747354	4.27039e-11
ENSG00000101187.11	SLCO4A1	-0.824442	4.39533e-11
ENSG00000197872.7	FAM49A	0.495433	4.41375e-11
ENSG00000186185.9	KIF18B	-0.899088	4.46359e-11
ENSG00000148835.9	TAF5	-0.702366	4.50051e-11
ENSG00000171574.13	ZNF584	-0.585485	4.5262e-11
ENSG00000104783.7	KCNN4	-1.00514	4.75899e-11
ENSG00000154839.5	SKA1	-0.701616	4.80983e-11
ENSG00000124222.17	STX16	0.450197	4.83543e-11
ENSG00000196230.8	TUBB	-0.789105	4.92041e-11
ENSG00000116005.7	PCYOX1	0.31862	4.98031e-11
ENSG00000237649.3	KIFC1	-0.894376	5.06307e-11
ENSG00000157426.9	AASDH	0.530233	5.14858e-11
ENSG00000161888.7	SPC24	-0.904102	5.14858e-11
ENSG00000136938.8	ANP32B	-0.664355	5.16097e-11
ENSG00000107104.14	KANK1	-0.741872	5.25975e-11
ENSG00000167202.7	TBC1D2B	-0.412314	5.30761e-11
ENSG00000184156.11	KCNQ3	-1.84601	5.53136e-11
ENSG00000135679.17	MDM2	0.724445	5.61058e-11
ENSG00000135045.6	C9orf40	-0.720914	5.62116e-11
ENSG00000113460.8	BRIX1	-0.428516	5.71768e-11
ENSG00000112029.5	FBXO5	-0.458091	5.72015e-11
ENSG00000173621.8	LRFN4	-0.701768	5.99732e-11
ENSG00000073921.13	PICALM	0.360826	6.03073e-11
ENSG00000120800.4	UTP20	-0.447852	6.34965e-11
ENSG00000164032.7	H2AFZ	-0.489476	6.45743e-11
ENSG00000085840.8	ORC1	-0.815739	6.60417e-11
ENSG00000204947.4	ZNF425	0.849782	6.60417e-11
ENSG00000110013.8	SIAE	0.551301	7.06003e-11
ENSG00000111581.5	NUP107	-0.441779	7.13912e-11
ENSG00000149136.3	SSRP1	-0.699165	7.38487e-11
ENSG00000100316.11	RPL3	-0.642411	7.52057e-11
ENSG00000213694.3	S1PR3	-1.20858	7.52072e-11
ENSG00000114796.11	KLHL24	0.541188	7.573e-11
ENSG00000253729.3	PRKDC	-0.466532	8.04703e-11
ENSG00000158169.7	FANCC	-0.611305	8.12007e-11
ENSG00000129951.14	LPPR3	-0.741936	8.55531e-11
ENSG00000146192.10	FGD2	0.609424	8.60498e-11
ENSG00000124357.8	NAGK	0.806711	8.7111e-11
ENSG00000173614.9	NMNAT1	0.650899	8.84134e-11
ENSG00000112697.11	TMEM30A	0.490028	9.13558e-11
ENSG00000142657.16	PGD	0.474029	9.79028e-11
ENSG00000124789.7	NUP153	-0.477289	9.86265e-11
ENSG00000175182.9	FAM131A	0.695226	1.00725e-10
ENSG00000198663.12	C6orf89	0.326382	1.04663e-10
ENSG00000080839.7	RBL1	-0.512828	1.05308e-10
ENSG00000224940.4	PRRT4	-1.48157	1.06266e-10
ENSG00000167380.12	ZNF226	0.499187	1.08471e-10
ENSG00000076248.6	UNG	-0.617462	1.09369e-10
ENSG00000159217.5	IGF2BP1	-0.560414	1.1074e-10
ENSG00000155592.11	ZKSCAN2	0.609509	1.1267e-10
ENSG00000145246.9	ATP10D	0.923673	1.13777e-10
ENSG00000167799.5	NUDT8	-1.16756	1.13976e-10
ENSG00000151503.8	NCAPD3	-0.494374	1.15303e-10
ENSG00000042088.9	TDP1	-0.547595	1.17273e-10
ENSG00000128272.10	ATF4	-0.501011	1.17557e-10
ENSG00000155115.6	GTF3C6	-0.464768	1.21693e-10
ENSG00000186603.4	HPDL	-1.1755	1.23635e-10
ENSG00000100330.11	MTMR3	0.386684	1.25589e-10
ENSG00000105926.11	MPP6	-0.739744	1.25589e-10
ENSG00000064393.11	HIPK2	0.69807	1.2682e-10
ENSG00000108829.9	LRRC59	-0.639675	1.30635e-10
ENSG00000005893.11	LAMP2	0.432429	1.38073e-10
ENSG00000166226.8	CCT2	-0.40595	1.38982e-10
ENSG00000101224.13	CDC25B	-0.730671	1.39115e-10
ENSG00000151117.4	TMEM86A	1.91939	1.39532e-10
ENSG00000142676.8	RPL11	-1.09654	1.4177e-10
ENSG00000108953.12	YWHAE	-0.337351	1.42443e-10
ENSG00000214706.6	IFRD2	-0.851015	1.43057e-10
ENSG00000198755.6	RPL10A	-0.587731	1.47498e-10
ENSG00000108559.7	NUP88	-0.391067	1.57016e-10
ENSG00000146263.7	MMS22L	-0.53318	1.60259e-10
ENSG00000137135.13	ARHGEF39	-0.930344	1.61614e-10
ENSG00000171757.11	LRRC34	-0.879669	1.66415e-10
ENSG00000116062.10	MSH6	-0.385432	1.68788e-10
ENSG00000012817.11	KDM5D	0.478642	1.71354e-10
ENSG00000124788.13	ATXN1	0.425501	1.71604e-10
ENSG00000121152.5	NCAPH	-0.603717	1.72524e-10
ENSG00000205593.7	DENND6B	0.570021	1.72524e-10
ENSG00000179409.6	GEMIN4	-0.64719	1.75055e-10
ENSG00000067208.10	EVI5	0.507402	1.78128e-10
ENSG00000160325.10	CACFD1	0.695271	1.82921e-10
ENSG00000132359.9	RAP1GAP2	0.497766	1.85297e-10
ENSG00000170634.8	ACYP2	0.688226	1.87124e-10
ENSG00000185633.6	NDUFA4L2	-1.25453	1.88766e-10
ENSG00000143622.6	RIT1	0.599843	1.94511e-10
ENSG00000197461.9	PDGFA	-1.51337	1.99866e-10
ENSG00000162378.8	ZYG11B	0.563274	1.99981e-10
ENSG00000075568.12	TMEM131	0.350634	2.00499e-10
ENSG00000097046.8	CDC7	-0.427425	2.0112e-10
ENSG00000187650.3	VMAC	0.733166	2.02503e-10
ENSG00000171603.12	CLSTN1	0.270824	2.02921e-10
ENSG00000185507.15	IRF7	0.634462	2.02921e-10
ENSG00000204469.8	PRRC2A	-0.721104	2.03943e-10
ENSG00000122223.8	CD244	-1.22708	2.08983e-10
ENSG00000156671.8	SAMD8	0.638257	2.14984e-10
ENSG00000069188.12	SDK2	-1.8218	2.15481e-10
ENSG00000169413.2	RNASE6	-1.12087	2.15481e-10
ENSG00000175866.11	BAIAP2	0.603146	2.18536e-10
ENSG00000174004.5	NRROS	-1.00846	2.18793e-10
ENSG00000039319.12	ZFYVE16	0.835682	2.29063e-10
ENSG00000167670.11	CHAF1A	-0.650664	2.29063e-10
ENSG00000007968.6	E2F2	-0.876965	2.33475e-10
ENSG00000171236.9	LRG1	0.593903	2.34343e-10
ENSG00000100154.10	TTC28	0.425511	2.34663e-10
ENSG00000138593.4	SECISBP2L	0.57361	2.34663e-10
ENSG00000179152.14	TCAIM	0.46648	2.41786e-10
ENSG00000256525.2	POLG2	0.419285	2.44905e-10
ENSG00000093009.5	CDC45	-0.828404	2.51676e-10
ENSG00000153107.7	ANAPC1	-0.40173	2.52573e-10
ENSG00000182378.8	PLCXD1	-0.770426	2.55658e-10
ENSG00000141232.4	TOB1	0.448122	2.57919e-10
ENSG00000132603.9	NIP7	-0.442744	2.60913e-10
ENSG00000213390.6	ARHGAP19	-0.441516	2.60913e-10
ENSG00000182557.3	SPNS3	-0.814956	2.69913e-10
ENSG00000145362.12	ANK2	-2.12313	2.82787e-10
ENSG00000167513.4	CDT1	-0.857949	2.83083e-10
ENSG00000075218.14	GTSE1	-0.793753	2.99193e-10
ENSG00000163528.8	CHCHD4	-0.740768	3.205e-10
ENSG00000157796.13	WDR19	0.529018	3.45731e-10
ENSG00000177706.8	FAM20C	0.6616	3.74775e-10
ENSG00000122068.8	FYTTD1	0.395618	3.96052e-10
ENSG00000119403.9	PHF19	-0.73073	4.00345e-10
ENSG00000111665.7	CDCA3	-0.902845	4.0312e-10
ENSG00000184445.7	KNTC1	-0.476766	4.0312e-10
ENSG00000127419.12	TMEM175	0.6947	4.11101e-10
ENSG00000079950.9	STX7	0.599788	4.16284e-10
ENSG00000163728.6	TTC14	0.550142	4.17388e-10
ENSG00000204592.5	HLA-E	0.465581	4.46998e-10
ENSG00000107815.3	C10orf2	-0.578992	4.50108e-10
ENSG00000109606.8	DHX15	-0.266523	4.51401e-10
ENSG00000188559.9	RALGAPA2	0.60301	4.51401e-10
ENSG00000124067.12	SLC12A4	0.502008	4.51943e-10
ENSG00000173638.14	SLC19A1	-0.748589	4.56578e-10
ENSG00000085999.7	RAD54L	-0.709635	4.59836e-10
ENSG00000082397.11	EPB41L3	0.746236	4.60449e-10
ENSG00000075131.5	TIPIN	-0.622555	4.70562e-10
ENSG00000166483.6	WEE1	-0.41806	4.78611e-10
ENSG00000139531.8	SUOX	0.452991	5.1856e-10
ENSG00000103196.7	CRISPLD2	1.82063	5.18631e-10
ENSG00000158882.8	TOMM40L	-0.51893	5.45106e-10
ENSG00000181938.9	GINS3	-0.722475	5.56614e-10
ENSG00000184261.4	KCNK12	-1.77304	5.66685e-10
ENSG00000147649.5	MTDH	-0.364355	5.84728e-10
ENSG00000107036.7	KIAA1432	0.345314	5.85425e-10
ENSG00000074201.4	CLNS1A	-0.413802	5.94818e-10
ENSG00000185238.8	PRMT3	-0.470253	6.15374e-10
ENSG00000103404.10	USP31	-0.476566	6.16979e-10
ENSG00000145908.8	ZNF300	1.15148	6.1701e-10
ENSG00000084774.9	CAD	-0.688959	6.39066e-10
ENSG00000167815.7	PRDX2	-0.706226	6.6145e-10
ENSG00000197380.6	DACT3	0.670834	7.16246e-10
ENSG00000075826.12	SEC31B	0.832813	7.54729e-10
ENSG00000006638.7	TBXA2R	-1.97335	7.66212e-10
ENSG00000188522.10	FAM83G	-0.678919	7.68663e-10
ENSG00000124780.9	KCNK17	-2.81517	7.68725e-10
ENSG00000225830.6	ERCC6	0.575338	7.77482e-10
ENSG00000172893.11	DHCR7	-0.901479	8.11273e-10
ENSG00000141376.16	BCAS3	0.48399	8.12037e-10
ENSG00000162869.11	PPP1R21	0.408203	8.39801e-10
ENSG00000174428.12	GTF2IRD2B	0.939546	8.62208e-10
ENSG00000179981.9	TSHZ1	-0.514522	8.62208e-10
ENSG00000129003.11	VPS13C	0.455449	8.87542e-10
ENSG00000170515.9	PA2G4	-0.761634	8.87732e-10
ENSG00000138363.10	ATIC	-0.516627	8.9969e-10
ENSG00000169093.10	ASMTL	0.523364	9.11499e-10
ENSG00000137154.8	RPS6	-0.542622	9.23764e-10
ENSG00000054523.12	KIF1B	0.554608	9.74272e-10
ENSG00000112118.13	MCM3	-0.667747	9.84097e-10
ENSG00000175198.10	PCCA	0.412453	1.03365e-09
ENSG00000101210.6	EEF1A2	-1.28768	1.03614e-09
ENSG00000179163.11	FUCA1	0.619771	1.03614e-09
ENSG00000122952.12	ZWINT	-0.731245	1.03621e-09
ENSG00000141140.12	MYO19	-0.54068	1.0556e-09
ENSG00000066230.6	SLC9A3	1.11426	1.07809e-09
ENSG00000198399.10	ITSN2	0.313211	1.1191e-09
ENSG00000134690.6	CDCA8	-0.827556	1.13857e-09
ENSG00000104974.6	LILRA1	0.686324	1.14742e-09
ENSG00000138758.7	SEPT11	-0.425557	1.14742e-09
ENSG00000167005.9	NUDT21	-0.316297	1.17153e-09
ENSG00000159259.7	CHAF1B	-0.564015	1.17403e-09
ENSG00000198815.4	FOXJ3	-0.375346	1.17616e-09
ENSG00000079616.8	KIF22	-0.732821	1.19527e-09
ENSG00000007264.9	MATK	-0.924572	1.23173e-09
ENSG00000164509.9	IL31RA	-1.53727	1.23277e-09
ENSG00000108448.16	TRIM16L	-0.649307	1.23575e-09
ENSG00000196584.2	XRCC2	-0.50465	1.24683e-09
ENSG00000146410.7	MTFR2	-0.672366	1.25823e-09
ENSG00000196975.10	ANXA4	0.395869	1.27283e-09
ENSG00000120594.12	PLXDC2	0.876909	1.30046e-09
ENSG00000127951.5	FGL2	0.485727	1.30046e-09
ENSG00000177602.4	GSG2	-0.746813	1.30046e-09
ENSG00000069275.12	NUCKS1	-0.316755	1.32871e-09
ENSG00000124120.6	TTPAL	0.400886	1.33591e-09
ENSG00000166803.6	KIAA0101	-0.598487	1.36461e-09
ENSG00000164087.3	POC1A	-0.744186	1.41032e-09
ENSG00000047578.8	KIAA0556	0.353827	1.41062e-09
ENSG00000005189.15	AC004381.6	-0.537641	1.43568e-09
ENSG00000113013.8	HSPA9	-0.544521	1.45352e-09
ENSG00000188987.2	HIST1H4D	-0.850558	1.48667e-09
ENSG00000117758.9	STX12	0.437175	1.50733e-09
ENSG00000177150.8	FAM210A	-0.462678	1.50998e-09
ENSG00000125740.9	FOSB	1.41763	1.51963e-09
ENSG00000178685.9	PARP10	0.477082	1.53654e-09
ENSG00000162783.8	IER5	0.522801	1.64281e-09
ENSG00000102974.10	CTCF	-0.383261	1.66329e-09
ENSG00000051180.12	RAD51	-0.699496	1.67803e-09
ENSG00000011405.9	PIK3C2A	0.543357	1.7025e-09
ENSG00000112242.10	E2F3	-0.464433	1.73041e-09
ENSG00000125966.8	MMP24	0.552779	1.78094e-09
ENSG00000130827.5	PLXNA3	0.511299	1.79375e-09
ENSG00000184254.12	ALDH1A3	0.713597	1.79582e-09
ENSG00000163918.6	RFC4	-0.406216	1.805e-09
ENSG00000186918.9	ZNF395	-0.612793	1.83652e-09
ENSG00000157445.10	CACNA2D3	-0.821386	1.86411e-09
ENSG00000111445.9	RFC5	-0.514022	1.89055e-09
ENSG00000113648.12	H2AFY	-0.423508	1.89055e-09
ENSG00000174373.11	RALGAPA1	0.491474	1.89165e-09
ENSG00000106484.10	MEST	-0.624561	1.90151e-09
ENSG00000077514.4	POLD3	-0.49932	1.94947e-09
ENSG00000203879.7	GDI1	0.446026	1.98347e-09
ENSG00000117305.10	HMGCL	0.529518	2.03096e-09
ENSG00000160305.13	DIP2A	0.354043	2.03096e-09
ENSG00000196715.5	VKORC1L1	-0.371624	2.04327e-09
ENSG00000114867.15	EIF4G1	-0.587048	2.09294e-09
ENSG00000188554.9	NBR1	0.341182	2.09294e-09
ENSG00000123411.10	IKZF4	-0.762046	2.14884e-09
ENSG00000167695.10	FAM57A	-0.690799	2.21014e-09
ENSG00000059573.4	ALDH18A1	-0.437826	2.26779e-09
ENSG00000123562.12	MORF4L2	-0.314253	2.27746e-09
ENSG00000152926.10	ZNF117	0.691485	2.38785e-09
ENSG00000146278.10	PNRC1	0.500931	2.39744e-09
ENSG00000159055.3	MIS18A	-0.690072	2.4072e-09
ENSG00000130309.6	COLGALT1	-0.728033	2.44977e-09
ENSG00000174842.12	GLMN	0.619058	2.45566e-09
ENSG00000089177.13	KIF16B	-0.610635	2.45728e-09
ENSG00000149516.9	MS4A3	-0.443583	2.49511e-09
ENSG00000117151.8	CTBS	0.539016	2.51155e-09
ENSG00000156504.12	FAM122B	-0.37616	2.53454e-09
ENSG00000161011.15	SQSTM1	0.322652	2.53454e-09
ENSG00000105374.5	NKG7	-1.29287	2.54122e-09
ENSG00000074966.6	TXK	0.774034	2.55655e-09
ENSG00000183401.7	CCDC159	0.578002	2.58216e-09
ENSG00000123685.4	BATF3	-2.04401	2.60927e-09
ENSG00000175216.10	CKAP5	-0.396011	2.64229e-09
ENSG00000228716.2	DHFR	-0.426191	2.67457e-09
ENSG00000163444.7	TMEM183A	-0.383068	2.73896e-09
ENSG00000185100.6	ADSSL1	0.616033	2.83599e-09
ENSG00000131944.5	C19orf40	-0.788913	2.92461e-09
ENSG00000072364.8	AFF4	0.362449	2.96441e-09
ENSG00000183044.7	ABAT	0.794697	2.99544e-09
ENSG00000099901.12	RANBP1	-0.669921	3.00665e-09
ENSG00000183605.12	SFXN4	-0.452417	3.11661e-09
ENSG00000090447.7	TFAP4	-0.761898	3.15252e-09
ENSG00000188610.8	FAM72B	-0.921608	3.15252e-09
ENSG00000134333.9	LDHA	-0.588793	3.15395e-09
ENSG00000145592.9	RPL37	-0.811837	3.15395e-09
ENSG00000107821.10	KAZALD1	-1.0514	3.15897e-09
ENSG00000131591.13	C1orf159	-0.639711	3.16988e-09
ENSG00000108055.9	SMC3	-0.421214	3.18156e-09
ENSG00000178999.8	AURKB	-0.887661	3.2225e-09
ENSG00000198848.8	CES1	-0.750604	3.28651e-09
ENSG00000105576.11	TNPO2	-0.64707	3.35029e-09
ENSG00000011454.12	RABGAP1	0.466587	3.3709e-09
ENSG00000100373.5	UPK3A	-1.47023	3.42429e-09
ENSG00000112659.9	CUL9	0.411662	3.42496e-09
ENSG00000138074.10	SLC5A6	-0.670782	3.42496e-09
ENSG00000172889.11	EGFL7	-0.872754	3.42833e-09
ENSG00000203814.5	HIST2H2BF	-0.911989	3.52036e-09
ENSG00000115271.6	GCA	0.481498	3.53948e-09
ENSG00000137547.4	MRPL15	-0.468267	3.56273e-09
ENSG00000166986.8	MARS	-0.47885	3.57825e-09
ENSG00000121774.13	KHDRBS1	-0.293886	3.59471e-09
ENSG00000109466.9	KLHL2	0.461481	3.64687e-09
ENSG00000235863.2	B3GALT4	0.695467	3.86688e-09
ENSG00000160961.7	ZNF333	0.510261	3.92901e-09
ENSG00000183520.7	UTP11L	-0.392534	3.92901e-09
ENSG00000168411.9	RFWD3	-0.471268	3.94634e-09
ENSG00000173272.9	MZT2A	-0.927867	4.52531e-09
ENSG00000132773.7	TOE1	-0.668158	4.55721e-09
ENSG00000196177.8	ACADSB	0.500663	4.584e-09
ENSG00000093072.11	CECR1	0.674641	4.71139e-09
ENSG00000006652.9	IFRD1	0.509679	4.72989e-09
ENSG00000164066.8	INTU	-0.615328	4.78086e-09
ENSG00000080200.5	CRYBG3	0.505993	4.81515e-09
ENSG00000153207.10	AHCTF1	-0.327566	4.85402e-09
ENSG00000166313.14	APBB1	-0.574598	4.88001e-09
ENSG00000161016.11	RPL8	-0.844551	4.88797e-09
ENSG00000128872.5	TMOD2	1.27609	4.9612e-09
ENSG00000104324.11	CPQ	0.442032	4.98048e-09
ENSG00000141569.6	TRIM65	-0.550496	5.04219e-09
ENSG00000162623.11	TYW3	-0.457593	5.12264e-09
ENSG00000120697.4	ALG5	-0.47076	5.12923e-09
ENSG00000069399.8	BCL3	0.675219	5.26229e-09
ENSG00000139579.8	NABP2	-0.598378	5.31059e-09
ENSG00000145979.13	TBC1D7	0.521798	5.34407e-09
ENSG00000125977.6	EIF2S2	-0.398049	5.56627e-09
ENSG00000109674.3	NEIL3	-0.504216	5.5982e-09
ENSG00000137563.7	GGH	-0.437955	5.72224e-09
ENSG00000110881.7	ASIC1	-0.863923	5.91716e-09
ENSG00000137575.7	SDCBP	0.487113	5.9328e-09
ENSG00000112195.8	TREML2	-1.50391	5.98879e-09
ENSG00000185753.8	CXorf38	0.395903	6.22403e-09
ENSG00000055044.6	NOP58	-0.422858	6.25194e-09
ENSG00000198933.5	TBKBP1	-0.480294	6.28047e-09
ENSG00000005156.7	LIG3	-0.55244	6.33288e-09
ENSG00000066027.7	PPP2R5A	0.301404	6.33288e-09
ENSG00000197905.4	TEAD4	-1.11617	6.33288e-09
ENSG00000174547.9	MRPL11	-0.679751	6.36219e-09
ENSG00000113273.11	ARSB	-0.603204	6.37253e-09
ENSG00000167566.12	NCKAP5L	0.579684	6.43026e-09
ENSG00000203883.5	SOX18	-2.92378	6.85065e-09
ENSG00000080824.14	HSP90AA1	-0.395148	6.89086e-09
ENSG00000158402.14	CDC25C	-0.609748	6.91573e-09
ENSG00000145087.8	STXBP5L	-1.02593	7.03476e-09
ENSG00000071246.6	VASH1	0.402726	7.05085e-09
ENSG00000110080.14	ST3GAL4	-0.850352	7.05436e-09
ENSG00000104728.11	ARHGEF10	-0.673615	7.08714e-09
ENSG00000123975.4	CKS2	-0.686009	7.08846e-09
ENSG00000135486.13	HNRNPA1	-0.454906	7.21713e-09
ENSG00000159131.12	GART	-0.378556	7.77694e-09
ENSG00000116237.11	ICMT	-0.397993	7.97949e-09
ENSG00000166788.5	SAAL1	-0.640657	7.97949e-09
ENSG00000185189.11	NRBP2	0.706341	8.01963e-09
ENSG00000099860.4	GADD45B	0.86216	8.10551e-09
ENSG00000136279.14	DBNL	0.431927	8.27538e-09
ENSG00000073536.13	NLE1	-0.604779	8.5028e-09
ENSG00000132334.12	PTPRE	-0.515592	8.77916e-09
ENSG00000182004.8	SNRPE	-0.56678	9.13486e-09
ENSG00000181007.7	ZFP82	-0.6125	9.26536e-09
ENSG00000100479.8	POLE2	-0.611434	9.41752e-09
ENSG00000078900.10	TP73	-0.470541	9.66205e-09
ENSG00000145220.9	LYAR	-0.661687	9.84937e-09
ENSG00000221829.5	FANCG	-0.629496	9.94037e-09
ENSG00000113758.9	DBN1	-0.69889	9.94549e-09
ENSG00000133704.5	IPO8	-0.367172	1.02242e-08
ENSG00000171163.11	ZNF692	-0.478033	1.05162e-08
ENSG00000159348.8	CYB5R1	0.397877	1.05851e-08
ENSG00000143801.12	PSEN2	0.684428	1.08158e-08
ENSG00000138668.14	HNRNPD	-0.335937	1.09405e-08
ENSG00000088305.14	DNMT3B	-0.803695	1.16812e-08
ENSG00000135678.7	CPM	0.422913	1.17096e-08
ENSG00000204482.6	LST1	-0.843392	1.19776e-08
ENSG00000110756.13	HPS5	0.392153	1.20147e-08
ENSG00000213967.6	ZNF726	-0.985779	1.20722e-08
ENSG00000057252.8	SOAT1	0.431172	1.2397e-08
ENSG00000125166.8	GOT2	-0.466801	1.33849e-08
ENSG00000128595.12	CALU	-0.311411	1.37959e-08
ENSG00000214194.4	LINC00998	-0.462397	1.38917e-08
ENSG00000133460.15	SLC2A11	0.807812	1.41757e-08
ENSG00000018699.7	TTC27	-0.475815	1.4199e-08
ENSG00000133315.6	MACROD1	-0.761146	1.4199e-08
ENSG00000197153.3	HIST1H3J	-1.17366	1.45034e-08
ENSG00000146731.6	CCT6A	-0.452894	1.45294e-08
ENSG00000132906.13	CASP9	0.447924	1.47815e-08
ENSG00000268798.1	AC027307.3	-1.45711	1.47815e-08
ENSG00000053372.4	MRTO4	-0.730005	1.49758e-08
ENSG00000071242.7	RPS6KA2	0.69898	1.50539e-08
ENSG00000105281.8	SLC1A5	-0.586969	1.51849e-08
ENSG00000172086.7	KRCC1	0.646651	1.52762e-08
ENSG00000183431.7	SF3A3	-0.579194	1.54617e-08
ENSG00000011422.7	PLAUR	-0.433174	1.55694e-08
ENSG00000175348.6	TMEM9B	0.361168	1.59316e-08
ENSG00000143878.8	RHOB	0.977802	1.59424e-08
ENSG00000182700.3	IGIP	0.770037	1.63092e-08
ENSG00000135828.7	RNASEL	0.415058	1.6559e-08
ENSG00000176490.4	DIRAS1	-0.935945	1.66274e-08
ENSG00000172006.7	ZNF554	0.58241	1.66604e-08
ENSG00000095485.12	CWF19L1	-0.415563	1.68065e-08
ENSG00000130720.8	FIBCD1	-1.09817	1.69626e-08
ENSG00000213462.4	ERV3-1	0.576813	1.7559e-08
ENSG00000116750.9	UCHL5	-0.416824	1.76833e-08
ENSG00000105011.4	ASF1B	-0.696275	1.78494e-08
ENSG00000138182.10	KIF20B	-0.398676	1.83524e-08
ENSG00000158106.8	RHPN1	0.612471	1.83524e-08
ENSG00000156042.13	TTC18	1.39348	1.86071e-08
ENSG00000184357.3	HIST1H1B	-0.91302	1.88484e-08
ENSG00000106327.8	TFR2	-0.709959	1.89556e-08
ENSG00000133816.9	MICAL2	-0.466392	1.91731e-08
ENSG00000173992.4	CCS	0.534079	1.91731e-08
ENSG00000070610.10	GBA2	0.405834	1.9332e-08
ENSG00000108848.11	LUC7L3	0.30999	1.96531e-08
ENSG00000163590.9	PPM1L	0.480239	1.98786e-08
ENSG00000075336.7	TIMM21	-0.665674	2.05143e-08
ENSG00000135316.13	SYNCRIP	-0.277879	2.06995e-08
ENSG00000143614.7	GATAD2B	0.363118	2.079e-08
ENSG00000127191.13	TRAF2	-0.469565	2.10335e-08
ENSG00000112419.10	PHACTR2	0.462201	2.1575e-08
ENSG00000164070.7	HSPA4L	-0.362468	2.1575e-08
ENSG00000109534.12	GAR1	-0.490586	2.18926e-08
ENSG00000196428.8	TSC22D2	0.403194	2.23325e-08
ENSG00000143321.14	HDGF	-0.55314	2.26964e-08
ENSG00000132142.15	ACACA	-0.457663	2.32419e-08
ENSG00000173692.8	PSMD1	-0.304462	2.34832e-08
ENSG00000139410.10	SDSL	0.852723	2.36688e-08
ENSG00000112079.8	STK38	0.475718	2.37398e-08
ENSG00000153395.5	LPCAT1	-0.447374	2.40144e-08
ENSG00000099331.9	MYO9B	0.398213	2.44147e-08
ENSG00000204472.8	AIF1	-0.797843	2.44303e-08
ENSG00000126749.10	EMG1	-0.489727	2.44313e-08
ENSG00000169891.13	REPS2	1.27762	2.44313e-08
ENSG00000233280.2	CRYBG3	0.474975	2.44313e-08
ENSG00000173894.6	CBX2	-0.703421	2.47297e-08
ENSG00000084463.3	WBP11	-0.520057	2.52611e-08
ENSG00000125648.10	SLC25A23	-0.512106	2.56444e-08
ENSG00000127564.12	PKMYT1	-0.823033	2.58141e-08
ENSG00000116771.5	AGMAT	-0.747658	2.62913e-08
ENSG00000135900.3	MRPL44	-0.431013	2.67417e-08
ENSG00000076242.10	MLH1	-0.339971	2.70385e-08
ENSG00000148248.9	SURF4	-0.59137	2.8446e-08
ENSG00000214655.6	ZSWIM8	0.46667	2.89369e-08
ENSG00000166813.10	KIF7	-0.902405	2.90401e-08
ENSG00000233822.3	HIST1H2BN	-0.913166	2.90401e-08
ENSG00000137364.4	TPMT	0.473262	2.92125e-08
ENSG00000141858.7	SAMD1	-0.590437	2.92954e-08
ENSG00000213918.6	DNASE1	0.43616	2.98228e-08
ENSG00000166147.9	FBN1	-0.792306	2.99898e-08
ENSG00000182400.10	TRAPPC6B	0.425319	3.15365e-08
ENSG00000106804.6	C5	0.555056	3.24261e-08
ENSG00000143324.9	XPR1	0.401466	3.25173e-08
ENSG00000180694.9	TMEM64	-0.616381	3.29099e-08
ENSG00000198176.8	TFDP1	-0.514937	3.36438e-08
ENSG00000107968.5	MAP3K8	0.618737	3.41778e-08
ENSG00000071564.10	TCF3	-0.694347	3.46479e-08
ENSG00000171777.11	RASGRP4	0.642471	3.48218e-08
ENSG00000143575.10	HAX1	-0.459111	3.58907e-08
ENSG00000169385.2	RNASE2	-1.22746	3.66581e-08
ENSG00000132423.6	COQ3	-0.678436	3.69708e-08
ENSG00000182611.3	HIST1H2AJ	-0.876185	3.81901e-08
ENSG00000227268.3	KLLN	-0.675516	3.85665e-08
ENSG00000168242.3	HIST1H2BI	-1.08883	4.07411e-08
ENSG00000092470.7	WDR76	-0.480987	4.11297e-08
ENSG00000180066.5	C10orf91	-1.66113	4.20939e-08
ENSG00000166401.9	SERPINB8	-0.391916	4.2099e-08
ENSG00000249115.4	HAUS5	-0.599532	4.2099e-08
ENSG00000134955.7	SLC37A2	0.598439	4.30213e-08
ENSG00000115541.6	HSPE1	-0.576891	4.30741e-08
ENSG00000172803.13	SNX32	0.660504	4.30741e-08
ENSG00000156639.7	ZFAND3	0.329974	4.34601e-08
ENSG00000104888.5	SLC17A7	-1.76393	4.36342e-08
ENSG00000009790.10	TRAF3IP3	0.383401	4.49648e-08
ENSG00000196371.2	FUT4	-0.438114	4.49648e-08
ENSG00000107949.12	BCCIP	-0.364125	4.50773e-08
ENSG00000107130.6	NCS1	-0.66671	4.70049e-08
ENSG00000118557.11	PMFBP1	-0.767869	4.73693e-08
ENSG00000139131.8	YARS2	-0.445694	4.78768e-08
ENSG00000172269.12	DPAGT1	-0.568146	4.95844e-08
ENSG00000169813.12	HNRNPF	-0.420138	4.97565e-08
ENSG00000066044.9	ELAVL1	-0.383592	4.98999e-08
ENSG00000106477.14	CEP41	-0.496268	5.00298e-08
ENSG00000144381.12	HSPD1	-0.519272	5.08488e-08
ENSG00000130544.7	ZNF557	0.321355	5.12991e-08
ENSG00000176619.6	LMNB2	-0.561645	5.1953e-08
ENSG00000171766.11	GATM	-0.569122	5.37543e-08
ENSG00000118655.4	DCLRE1B	-0.521276	5.57567e-08
ENSG00000101447.9	FAM83D	-0.615512	5.61029e-08
ENSG00000113494.12	PRLR	-2.97279	5.66783e-08
ENSG00000143630.5	HCN3	-0.904478	5.86644e-08
ENSG00000184348.2	HIST1H2AK	-1.04465	5.91932e-08
ENSG00000104889.4	RNASEH2A	-0.701341	6.02455e-08
ENSG00000086015.16	MAST2	0.458657	6.08014e-08
ENSG00000131437.11	KIF3A	0.593162	6.08014e-08
ENSG00000197498.8	RPF2	-0.406162	6.08014e-08
ENSG00000109971.9	HSPA8	-0.474927	6.08185e-08
ENSG00000154864.7	PIEZO2	-0.899896	6.08901e-08
ENSG00000100353.13	EIF3D	-0.540925	6.171e-08
ENSG00000187741.10	FANCA	-0.574185	6.21067e-08
ENSG00000178202.8	KDELC2	-0.432717	6.24606e-08
ENSG00000143924.14	EML4	0.260487	6.25124e-08
ENSG00000178150.4	ZNF114	-1.0436	6.40722e-08
ENSG00000164292.8	RHOBTB3	0.503368	6.40881e-08
ENSG00000167207.7	NOD2	-0.477848	6.44955e-08
ENSG00000105483.12	CARD8	0.280427	6.45293e-08
ENSG00000134508.8	CABLES1	-0.564934	6.55203e-08
ENSG00000147324.6	MFHAS1	-0.38249	6.58571e-08
ENSG00000112144.11	ICK	-0.361924	6.59673e-08
ENSG00000167701.9	GPT	0.677075	6.59673e-08
ENSG00000182199.6	SHMT2	-0.569062	6.6343e-08
ENSG00000142149.4	HUNK	-1.11976	6.69622e-08
ENSG00000185130.4	HIST1H2BL	-0.914747	6.79531e-08
ENSG00000213551.4	DNAJC9	-0.434476	6.85298e-08
ENSG00000110917.3	MLEC	-0.424505	6.85751e-08
ENSG00000116161.13	CACYBP	-0.501931	6.8578e-08
ENSG00000070759.12	TESK2	0.542703	6.87699e-08
ENSG00000167553.10	TUBA1C	-0.66897	7.072e-08
ENSG00000103326.6	CAPN15	-0.524702	7.36866e-08
ENSG00000006025.7	OSBPL7	0.509647	7.4062e-08
ENSG00000129219.9	PLD2	0.586766	7.4062e-08
ENSG00000198563.9	DDX39B	-0.435228	7.45763e-08
ENSG00000188211.4	NCR3LG1	-0.565682	7.61234e-08
ENSG00000146670.5	CDCA5	-0.669053	7.61305e-08
ENSG00000130997.12	POLN	0.838438	7.70093e-08
ENSG00000079308.12	TNS1	-0.731975	7.7607e-08
ENSG00000103995.9	CEP152	-0.446452	7.7607e-08
ENSG00000181472.4	ZBTB2	-0.469854	7.80849e-08
ENSG00000167526.9	RPL13	-0.633365	7.82271e-08
ENSG00000140992.14	PDPK1	0.323843	7.89834e-08
ENSG00000112290.8	WASF1	-1.03858	7.90533e-08
ENSG00000124313.8	IQSEC2	0.539018	8.03204e-08
ENSG00000160072.15	ATAD3B	-0.627702	8.16551e-08
ENSG00000143369.10	ECM1	-1.00003	8.22639e-08
ENSG00000169252.4	ADRB2	0.467807	8.23597e-08
ENSG00000139112.6	GABARAPL1	0.943007	8.27487e-08
ENSG00000164649.15	CDCA7L	-0.580379	8.38196e-08
ENSG00000116670.10	MAD2L2	-0.627068	8.52516e-08
ENSG00000152240.8	HAUS1	-0.415376	8.6388e-08
ENSG00000130958.7	SLC35D2	0.830671	8.7438e-08
ENSG00000037042.8	TUBG2	0.876429	8.92825e-08
ENSG00000165233.13	C9orf89	0.443914	8.95274e-08
ENSG00000163113.10	OTUD7B	0.430953	8.99601e-08
ENSG00000167615.12	LENG8	0.496495	8.99601e-08
ENSG00000134910.8	STT3A	-0.552967	9.02853e-08
ENSG00000134313.10	KIDINS220	0.337198	9.14132e-08
ENSG00000148290.5	SURF1	0.489268	9.31614e-08
ENSG00000119285.6	HEATR1	-0.336303	9.41824e-08
ENSG00000119969.10	HELLS	-0.435215	9.45537e-08
ENSG00000141956.9	PRDM15	-0.484153	9.4673e-08
ENSG00000145936.4	KCNMB1	1.36104	9.47786e-08
ENSG00000162063.8	CCNF	-0.694223	9.59192e-08
ENSG00000101126.11	ADNP	-0.296151	9.77337e-08
ENSG00000110104.7	CCDC86	-0.779155	9.78513e-08
ENSG00000166887.11	VPS39	0.293371	9.81058e-08
ENSG00000127423.6	AUNIP	-0.684276	9.85515e-08
ENSG00000173681.12	CXorf23	0.516839	9.9062e-08
ENSG00000092853.9	CLSPN	-0.455651	1.00659e-07
ENSG00000231500.2	RPS18	-0.772305	1.00659e-07
ENSG00000136960.8	ENPP2	-1.04464	1.00731e-07
ENSG00000075702.12	WDR62	-0.72424	1.03058e-07
ENSG00000136068.10	FLNB	0.395292	1.03404e-07
ENSG00000127585.7	FBXL16	1.1014	1.03545e-07
ENSG00000135241.12	PNPLA8	0.47092	1.04233e-07
ENSG00000161970.8	RPL26	-1.04962	1.0612e-07
ENSG00000123131.8	PRDX4	-0.428585	1.07982e-07
ENSG00000109689.10	STIM2	0.610121	1.08009e-07
ENSG00000113456.14	RAD1	-0.363496	1.08009e-07
ENSG00000144746.6	ARL6IP5	0.371257	1.08009e-07
ENSG00000181163.9	NPM1	-0.441685	1.08922e-07
ENSG00000133317.10	LGALS12	-0.997829	1.09899e-07
ENSG00000196739.10	COL27A1	-0.781105	1.10542e-07
ENSG00000116133.7	DHCR24	-0.374511	1.17168e-07
ENSG00000137337.10	MDC1	-0.561929	1.17168e-07
ENSG00000256018.1	HIST1H3G	-0.942417	1.17168e-07
ENSG00000177674.11	AGTRAP	-0.434126	1.17184e-07
ENSG00000183010.12	PYCR1	-0.755912	1.18112e-07
ENSG00000134769.17	DTNA	0.369369	1.18814e-07
ENSG00000120438.7	TCP1	-0.353278	1.23339e-07
ENSG00000125247.11	TMTC4	-0.356798	1.2498e-07
ENSG00000166311.5	SMPD1	0.46004	1.2498e-07
ENSG00000043355.6	ZIC2	-0.681192	1.27811e-07
ENSG00000141580.11	WDR45B	0.275333	1.28723e-07
ENSG00000184566.2	AC132216.1	0.575056	1.288e-07
ENSG00000170860.3	LSM3	-0.498004	1.29075e-07
ENSG00000013810.14	TACC3	-0.667294	1.41086e-07
ENSG00000108523.11	RNF167	-0.524239	1.44538e-07
ENSG00000099840.9	IZUMO4	0.77351	1.45911e-07
ENSG00000162994.11	CLHC1	0.672578	1.50936e-07
ENSG00000067334.9	DNTTIP2	-0.301497	1.52412e-07
ENSG00000167930.11	ITFG3	0.485163	1.53756e-07
ENSG00000186314.7	PRELID2	-0.670059	1.5484e-07
ENSG00000106355.5	LSM5	-0.434216	1.57095e-07
ENSG00000186567.8	CEACAM19	1.06057	1.57847e-07
ENSG00000128708.8	HAT1	-0.41081	1.59093e-07
ENSG00000147383.6	NSDHL	-0.472244	1.59707e-07
ENSG00000051108.10	HERPUD1	-0.432538	1.60206e-07
ENSG00000162711.12	NLRP3	0.348354	1.61256e-07
ENSG00000120254.11	MTHFD1L	-0.540077	1.62351e-07
ENSG00000109113.13	RAB34	-0.689587	1.65194e-07
ENSG00000180198.11	RCC1	-0.595773	1.65254e-07
ENSG00000203760.4	CENPW	-0.660054	1.65271e-07
ENSG00000188042.5	ARL4C	-0.978591	1.65591e-07
ENSG00000004864.9	SLC25A13	-0.350706	1.67027e-07
ENSG00000059728.6	MXD1	0.50484	1.67248e-07
ENSG00000124693.2	HIST1H3B	-0.889258	1.71209e-07
ENSG00000074696.8	PTPLAD1	-0.330803	1.71459e-07
ENSG00000123416.11	TUBA1B	-0.632917	1.72215e-07
ENSG00000189050.10	RNFT1	0.572557	1.74856e-07
ENSG00000232859.5	LYRM9	1.32747	1.75329e-07
ENSG00000167619.7	TMEM145	-0.917445	1.76212e-07
ENSG00000091436.12	MLTK	-0.288729	1.81031e-07
ENSG00000143621.12	ILF2	-0.4546	1.82403e-07
ENSG00000169105.6	CHST14	-0.636607	1.8392e-07
ENSG00000100380.8	ST13	-0.290771	1.84036e-07
ENSG00000185477.4	GPRIN3	-1.92796	1.85123e-07
ENSG00000108773.6	KAT2A	-0.552914	1.85143e-07
ENSG00000134291.7	TMEM106C	-0.444354	1.86933e-07
ENSG00000117013.10	KCNQ4	-1.58276	1.90753e-07
ENSG00000145375.7	SPATA5	-0.328776	1.90753e-07
ENSG00000186480.8	INSIG1	-0.566955	1.93285e-07
ENSG00000104626.10	ERI1	-0.322864	1.97176e-07
ENSG00000135801.5	TAF5L	-0.37499	1.99422e-07
ENSG00000144580.9	RQCD1	-0.372589	2.01986e-07
ENSG00000160445.6	ZER1	0.400608	2.01986e-07
ENSG00000164284.10	GRPEL2	-0.366107	2.05437e-07
ENSG00000196290.10	NIF3L1	-0.400607	2.05437e-07
ENSG00000170801.5	HTRA3	-1.08303	2.09646e-07
ENSG00000166261.6	ZNF202	-0.38634	2.15297e-07
ENSG00000178764.6	ZHX2	-0.527211	2.19201e-07
ENSG00000127220.5	ABHD8	0.545696	2.19297e-07
ENSG00000156253.2	RWDD2B	0.421647	2.19297e-07
ENSG00000156398.8	SFXN2	-0.54325	2.22208e-07
ENSG00000178409.9	BEND3	-0.761182	2.24677e-07
ENSG00000072501.13	SMC1A	-0.47801	2.34723e-07
ENSG00000234444.5	ZNF736	-0.363464	2.34915e-07
ENSG00000014138.4	POLA2	-0.50156	2.36488e-07
ENSG00000155380.7	SLC16A1	-0.415649	2.37144e-07
ENSG00000113296.10	THBS4	-0.96745	2.395e-07
ENSG00000113649.7	TCERG1	-0.420745	2.40058e-07
ENSG00000122966.9	CIT	-0.565111	2.50538e-07
ENSG00000163655.11	GMPS	-0.228101	2.54549e-07
ENSG00000125630.11	POLR1B	-0.400292	2.57088e-07
ENSG00000063438.12	AHRR	-0.678233	2.5851e-07
ENSG00000104765.10	BNIP3L	0.752754	2.62602e-07
ENSG00000142303.9	ADAMTS10	1.01614	2.62602e-07
ENSG00000010404.13	IDS	0.676999	2.63325e-07
ENSG00000224420.3	ADM5	-1.15362	2.64559e-07
ENSG00000078399.11	HOXA9	0.327525	2.67234e-07
ENSG00000139631.14	CSAD	0.49556	2.67877e-07
ENSG00000103047.3	TANGO6	-0.440551	2.75165e-07
ENSG00000167721.6	TSR1	-0.502793	2.80851e-07
ENSG00000125656.4	CLPP	-0.824736	2.81676e-07
ENSG00000153574.8	RPIA	-0.367556	2.84623e-07
ENSG00000256316.1	HIST1H3F	-0.849363	2.9102e-07
ENSG00000129493.10	HEATR5A	0.486169	2.96017e-07
ENSG00000184014.3	DENND5A	0.392685	2.99531e-07
ENSG00000114013.11	CD86	1.56679	3.0361e-07
ENSG00000173457.6	PPP1R14B	-0.73717	3.10849e-07
ENSG00000144357.12	UBR3	0.309973	3.11471e-07
ENSG00000128951.9	DUT	-0.397858	3.1201e-07
ENSG00000094880.6	CDC23	-0.306909	3.12835e-07
ENSG00000080815.14	PSEN1	0.245018	3.1777e-07
ENSG00000152465.13	NMT2	0.661947	3.1777e-07
ENSG00000170571.7	EMB	-0.417067	3.1777e-07
ENSG00000183856.6	IQGAP3	-0.579963	3.21206e-07
ENSG00000080345.13	RIF1	-0.309122	3.21568e-07
ENSG00000172785.14	CBWD1	0.52826	3.27142e-07
ENSG00000105290.7	APLP1	-0.716809	3.2744e-07
ENSG00000124762.9	CDKN1A	0.743622	3.31592e-07
ENSG00000110042.3	DTX4	-0.449736	3.32193e-07
ENSG00000214456.4	PLIN5	1.50352	3.32193e-07
ENSG00000188997.3	KCTD21	0.672499	3.37582e-07
ENSG00000211460.7	TSN	-0.32058	3.43199e-07
ENSG00000184557.3	SOCS3	0.533639	3.43367e-07
ENSG00000108292.12	MLLT6	-0.265852	3.46796e-07
ENSG00000164733.16	CTSB	0.450196	3.46866e-07
ENSG00000103495.9	MAZ	-0.724301	3.484e-07
ENSG00000001497.12	LAS1L	-0.489679	3.51753e-07
ENSG00000161944.12	ASGR2	-1.06347	3.55256e-07
ENSG00000100439.6	ABHD4	0.815896	3.55392e-07
ENSG00000125148.6	MT2A	0.528591	3.55402e-07
ENSG00000198521.7	ZNF43	-0.652827	3.55402e-07
ENSG00000198912.6	C1orf174	-0.450384	3.69592e-07
ENSG00000116717.7	GADD45A	0.602566	3.74425e-07
ENSG00000113108.13	APBB3	0.50394	3.75345e-07
ENSG00000130520.6	LSM4	-0.60151	3.77016e-07
ENSG00000175155.4	YPEL2	0.472161	3.77322e-07
ENSG00000205060.6	SLC35B4	-0.368518	3.83145e-07
ENSG00000100162.10	CENPM	-0.733796	3.86882e-07
ENSG00000138028.10	CGREF1	-0.674513	3.88581e-07
ENSG00000135951.10	TSGA10	0.873739	3.92798e-07
ENSG00000126351.8	THRA	-0.594438	3.92857e-07
ENSG00000120896.9	SORBS3	-0.608087	3.94069e-07
ENSG00000185215.4	TNFAIP2	0.323987	4.0015e-07
ENSG00000136935.9	GOLGA1	0.304694	4.00784e-07
ENSG00000108179.9	PPIF	-0.595906	4.02841e-07
ENSG00000110400.6	PVRL1	-0.299553	4.02841e-07
ENSG00000180596.7	HIST1H2BC	-0.778882	4.02841e-07
ENSG00000006534.11	ALDH3B1	0.394103	4.11682e-07
ENSG00000109756.4	RAPGEF2	0.395372	4.13338e-07
ENSG00000196220.11	SRGAP3	0.480601	4.23114e-07
ENSG00000213024.6	NUP62	-0.61781	4.23523e-07
ENSG00000239672.3	NME1	-0.623001	4.2816e-07
ENSG00000042445.9	RETSAT	0.285744	4.29844e-07
ENSG00000196411.5	EPHB4	0.450873	4.31174e-07
ENSG00000233198.2	RNF224	1.14545	4.31224e-07
ENSG00000102908.16	NFAT5	0.428685	4.33386e-07
ENSG00000146842.12	TMEM209	-0.387977	4.37853e-07
ENSG00000106868.12	SUSD1	-0.400562	4.41761e-07
ENSG00000145819.11	ARHGAP26	0.293457	4.43328e-07
ENSG00000081087.10	OSTM1	0.52276	4.4401e-07
ENSG00000102878.11	HSF4	0.976873	4.4668e-07
ENSG00000170144.14	HNRNPA3	-0.289404	4.4698e-07
ENSG00000172534.9	HCFC1	-0.628068	4.49977e-07
ENSG00000167851.9	CD300A	-0.851025	4.51326e-07
ENSG00000051009.6	FAM160A2	0.472411	4.58827e-07
ENSG00000172828.8	CES3	-0.843369	4.59577e-07
ENSG00000108389.5	MTMR4	-0.363505	4.68673e-07
ENSG00000168393.8	DTYMK	-0.649607	4.69216e-07
ENSG00000119772.12	DNMT3A	-0.427608	4.72116e-07
ENSG00000173208.3	ABCD2	0.654554	4.818e-07
ENSG00000122707.7	RECK	0.531224	4.93577e-07
ENSG00000123374.6	CDK2	-0.448352	4.94204e-07
ENSG00000188130.9	MAPK12	-0.526551	4.95232e-07
ENSG00000240230.1	COX19	0.349879	4.98469e-07
ENSG00000171824.9	EXOSC10	-0.408445	5.06275e-07
ENSG00000204366.3	ZBTB12	-0.487641	5.16014e-07
ENSG00000136450.8	SRSF1	-0.326574	5.25971e-07
ENSG00000092445.7	TYRO3	-0.962958	5.26242e-07
ENSG00000120699.8	EXOSC8	-0.440286	5.29618e-07
ENSG00000171298.8	GAA	0.497821	5.4215e-07
ENSG00000171502.10	COL24A1	-0.656444	5.45333e-07
ENSG00000066697.10	MSANTD3	-0.686738	5.52443e-07
ENSG00000108239.8	TBC1D12	0.411117	5.55899e-07
ENSG00000197535.10	MYO5A	0.342347	5.62176e-07
ENSG00000168010.6	ATG16L2	0.470516	5.63641e-07
ENSG00000164362.14	TERT	-1.01812	5.70769e-07
ENSG00000167747.9	C19orf48	-0.661767	5.7307e-07
ENSG00000128564.5	VGF	-1.60859	5.78139e-07
ENSG00000006114.11	SYNRG	0.282185	5.83229e-07
ENSG00000101194.13	SLC17A9	-0.631402	5.83229e-07
ENSG00000126773.8	PCNXL4	0.330373	5.87047e-07
ENSG00000148459.11	PDSS1	-0.435469	5.92567e-07
ENSG00000158517.9	NCF1	0.869185	5.98652e-07
ENSG00000137145.16	DENND4C	0.496766	6.11156e-07
ENSG00000119801.8	YPEL5	0.639098	6.13649e-07
ENSG00000137404.10	NRM	-0.71202	6.28645e-07
ENSG00000225190.4	PLEKHM1	0.409087	6.33526e-07
ENSG00000168137.11	SETD5	-0.30238	6.34109e-07
ENSG00000150753.7	CCT5	-0.532396	6.44738e-07
ENSG00000044459.10	CNTLN	-0.547463	6.50577e-07
ENSG00000099985.3	OSM	-1.01957	6.51024e-07
ENSG00000165891.11	E2F7	-0.387476	6.52155e-07
ENSG00000144867.7	SRPRB	-0.352867	6.63768e-07
ENSG00000108671.5	PSMD11	-0.368852	6.63945e-07
ENSG00000119929.8	CUTC	-0.449462	6.67457e-07
ENSG00000188163.6	FAM166A	1.94055	6.83527e-07
ENSG00000133027.13	PEMT	-0.772004	6.85503e-07
ENSG00000185946.11	RNPC3	0.410957	6.97533e-07
ENSG00000164818.11	HEATR2	-0.611469	6.97681e-07
ENSG00000119335.12	SET	-0.30558	6.98046e-07
ENSG00000185480.7	PARPBP	-0.385984	7.01442e-07
ENSG00000148218.11	ALAD	0.359947	7.10592e-07
ENSG00000048392.7	RRM2B	0.382762	7.17374e-07
ENSG00000174791.6	RIN1	-0.64848	7.24562e-07
ENSG00000103642.7	LACTB	0.444712	7.26914e-07
ENSG00000142686.7	C1orf216	-0.417598	7.27444e-07
ENSG00000100485.7	SOS2	0.365333	7.28133e-07
ENSG00000104998.2	IL27RA	-0.702291	7.29742e-07
ENSG00000109107.9	ALDOC	0.621928	7.3391e-07
ENSG00000101412.9	E2F1	-0.656774	7.40256e-07
ENSG00000197903.6	HIST1H2BK	-0.719831	7.47242e-07
ENSG00000198042.6	MAK16	-0.417414	7.51509e-07
ENSG00000116741.6	RGS2	1.53816	7.55384e-07
ENSG00000198001.9	IRAK4	0.275826	7.60309e-07
ENSG00000197948.6	FCHSD1	0.388296	7.80282e-07
ENSG00000095303.10	PTGS1	0.606087	7.84521e-07
ENSG00000165240.13	ATP7A	0.604555	7.84521e-07
ENSG00000166946.9	CCNDBP1	0.31698	8.00656e-07
ENSG00000034677.7	RNF19A	0.300947	8.10818e-07
ENSG00000174684.6	B3GNT1	-0.737981	8.11958e-07
ENSG00000132661.3	NXT1	-0.572879	8.12321e-07
ENSG00000126070.14	AGO3	0.358732	8.13661e-07
ENSG00000086827.4	ZW10	-0.361262	8.16771e-07
ENSG00000187522.9	HSPA14	-0.339586	8.22894e-07
ENSG00000165916.4	PSMC3	-0.553723	8.288e-07
ENSG00000135148.7	TRAFD1	0.373414	8.31113e-07
ENSG00000147894.10	C9orf72	0.512645	8.36555e-07
ENSG00000103042.4	SLC38A7	-0.633332	8.38006e-07
ENSG00000196209.8	SIRPB2	-0.898505	8.38006e-07
ENSG00000197776.3	KLHDC1	0.860791	8.44782e-07
ENSG00000143178.8	TBX19	0.864509	8.51371e-07
ENSG00000163659.8	TIPARP	0.714293	8.51371e-07
ENSG00000135862.5	LAMC1	-0.320051	8.58541e-07
ENSG00000116120.8	FARSB	-0.399345	8.66427e-07
ENSG00000186354.6	C9orf47	-1.16848	8.72571e-07
ENSG00000104549.7	SQLE	-0.312266	8.7383e-07
ENSG00000134308.9	YWHAQ	-0.293311	8.83836e-07
ENSG00000031003.6	FAM13B	0.331206	9.06379e-07
ENSG00000115866.6	DARS	-0.311171	9.10244e-07
ENSG00000104946.6	TBC1D17	0.399859	9.12472e-07
ENSG00000241343.5	RPL36A	-0.454935	9.40123e-07
ENSG00000253320.1	KB-1507C5.2	0.931344	9.45442e-07
ENSG00000136699.15	SMPD4	-0.609568	9.50076e-07
ENSG00000219481.6	NBPF1	0.554451	9.52194e-07
ENSG00000237693.4	IRGM	0.942411	9.7004e-07
ENSG00000007255.6	TRAPPC6A	0.563012	9.76737e-07
ENSG00000074695.5	LMAN1	-0.263079	9.76737e-07
ENSG00000165424.6	ZCCHC24	0.389578	9.90355e-07
ENSG00000163811.7	WDR43	-0.400378	9.94095e-07
ENSG00000089060.7	SLC8B1	0.396362	9.9968e-07
ENSG00000120526.6	NUDCD1	-0.31656	9.9968e-07
ENSG00000140043.7	PTGR2	0.729685	1.00863e-06
ENSG00000186998.11	EMID1	-0.757419	1.00906e-06
ENSG00000085433.11	WDR47	0.371646	1.05731e-06
ENSG00000096384.15	HSP90AB1	-0.402636	1.07294e-06
ENSG00000148655.10	C10orf11	0.520498	1.0828e-06
ENSG00000125319.10	C17orf53	-0.742941	1.08686e-06
ENSG00000101290.9	CDS2	0.330753	1.09312e-06
ENSG00000074657.9	ZNF532	-0.667645	1.094e-06
ENSG00000174100.5	MRPL45	-0.360461	1.11816e-06
ENSG00000196182.6	STK40	0.322211	1.12557e-06
ENSG00000127948.9	POR	0.389004	1.13014e-06
ENSG00000186376.10	ZNF75D	0.433628	1.13474e-06
ENSG00000151849.10	CENPJ	-0.37935	1.13628e-06
ENSG00000135446.12	CDK4	-0.62291	1.14278e-06
ENSG00000091651.4	ORC6	-0.433919	1.14333e-06
ENSG00000206053.8	HN1L	-0.279129	1.17066e-06
ENSG00000088205.8	DDX18	-0.290371	1.18454e-06
ENSG00000071626.12	DAZAP1	-0.47541	1.18824e-06
ENSG00000177565.11	TBL1XR1	-0.291588	1.19003e-06
ENSG00000117877.6	CD3EAP	-0.620071	1.19623e-06
ENSG00000137752.18	CASP1	0.481571	1.2051e-06
ENSG00000143157.7	POGK	-0.305021	1.20528e-06
ENSG00000144802.7	NFKBIZ	0.785374	1.20813e-06
ENSG00000163602.9	RYBP	0.569514	1.22092e-06
ENSG00000092108.16	SCFD1	0.425314	1.26625e-06
ENSG00000170271.6	FAXDC2	-0.528384	1.26918e-06
ENSG00000107537.9	PHYH	0.380013	1.27161e-06
ENSG00000139641.8	ESYT1	-0.349274	1.29169e-06
ENSG00000186591.7	UBE2H	0.444181	1.30247e-06
ENSG00000039650.5	PNKP	0.364925	1.30266e-06
ENSG00000141337.8	ARSG	0.514968	1.30266e-06
ENSG00000154027.14	AK5	-1.00224	1.30266e-06
ENSG00000164604.8	GPR85	-0.619811	1.30266e-06
ENSG00000155189.7	AGPAT5	-0.238506	1.31798e-06
ENSG00000103342.8	GSPT1	-0.299804	1.33588e-06
ENSG00000088247.11	KHSRP	-0.537052	1.3359e-06
ENSG00000141424.8	SLC39A6	-0.272021	1.35404e-06
ENSG00000062524.11	LTK	-0.923328	1.35837e-06
ENSG00000126261.8	UBA2	-0.318128	1.37895e-06
ENSG00000128973.7	CLN6	-0.602771	1.38483e-06
ENSG00000110074.6	FOXRED1	-0.473983	1.38679e-06
ENSG00000198366.5	HIST1H3A	-0.788412	1.38787e-06
ENSG00000116830.7	TTF2	-0.402424	1.39941e-06
ENSG00000102178.8	UBL4A	-0.532442	1.40503e-06
ENSG00000204103.2	MAFB	1.28127	1.41898e-06
ENSG00000124575.5	HIST1H1D	-0.62812	1.42689e-06
ENSG00000136861.13	CDK5RAP2	-0.39504	1.43078e-06
ENSG00000139428.7	MMAB	-0.496446	1.44359e-06
ENSG00000144655.10	CSRNP1	0.524545	1.44359e-06
ENSG00000116698.16	SMG7	-0.269084	1.45431e-06
ENSG00000153786.8	ZDHHC7	0.345318	1.46014e-06
ENSG00000074964.12	ARHGEF10L	0.382978	1.49151e-06
ENSG00000111885.5	MAN1A1	0.462147	1.49151e-06
ENSG00000099364.12	FBXL19	-0.496401	1.50366e-06
ENSG00000157193.10	LRP8	-0.439222	1.50795e-06
ENSG00000109184.10	DCUN1D4	-0.459889	1.52688e-06
ENSG00000155506.12	LARP1	-0.442751	1.54561e-06
ENSG00000122483.13	CCDC18	-0.322889	1.54654e-06
ENSG00000116396.9	KCNC4	-0.703475	1.55988e-06
ENSG00000183527.7	PSMG1	-0.462686	1.56573e-06
ENSG00000171456.12	ASXL1	-0.41632	1.58111e-06
ENSG00000196419.8	XRCC6	-0.421659	1.58111e-06
ENSG00000130649.5	CYP2E1	-0.88501	1.59444e-06
ENSG00000204386.6	NEU1	0.406285	1.60851e-06
ENSG00000163923.5	RPL39L	-0.782131	1.61657e-06
ENSG00000182307.8	C8orf33	-0.527059	1.61657e-06
ENSG00000135451.8	TROAP	-0.736268	1.62331e-06
ENSG00000139990.13	DCAF5	0.251789	1.62792e-06
ENSG00000151650.7	VENTX	-0.446221	1.62792e-06
ENSG00000197892.8	KIF13B	0.475939	1.64923e-06
ENSG00000115761.11	NOL10	-0.402176	1.65585e-06
ENSG00000152192.6	POU4F1	-2.00348	1.65703e-06
ENSG00000198890.6	PRMT6	-0.423463	1.6579e-06
ENSG00000132475.4	H3F3B	0.229235	1.66072e-06
ENSG00000127586.12	CHTF18	-0.491014	1.6797e-06
ENSG00000196532.4	HIST1H3C	-0.970281	1.6797e-06
ENSG00000083544.9	TDRD3	-0.354906	1.68117e-06
ENSG00000054267.16	ARID4B	0.273388	1.73564e-06
ENSG00000101104.8	PABPC1L	0.513704	1.76357e-06
ENSG00000100335.8	MIEF1	-0.469152	1.78462e-06
ENSG00000104763.13	ASAH1	0.431563	1.78544e-06
ENSG00000142188.12	TMEM50B	0.373713	1.78888e-06
ENSG00000163072.10	NOSTRIN	-0.769832	1.78888e-06
ENSG00000108852.10	MPP2	-1.11222	1.79415e-06
ENSG00000078668.9	VDAC3	-0.29111	1.79453e-06
ENSG00000124486.8	USP9X	0.288346	1.81126e-06
ENSG00000137124.6	ALDH1B1	-0.502091	1.81358e-06
ENSG00000150768.11	DLAT	-0.316659	1.82481e-06
ENSG00000114554.7	PLXNA1	-0.389403	1.83624e-06
ENSG00000110987.4	BCL7A	-0.547337	1.84647e-06
ENSG00000170190.11	SLC16A5	0.424109	1.84881e-06
ENSG00000085982.9	USP40	0.296738	1.84958e-06
ENSG00000123737.8	EXOSC9	-0.357628	1.85373e-06
ENSG00000015479.13	MATR3	-0.212819	1.86778e-06
ENSG00000126243.4	LRFN3	-0.588304	1.88762e-06
ENSG00000124529.3	HIST1H4B	-0.679356	1.8919e-06
ENSG00000149294.12	NCAM1	-1.42784	1.8919e-06
ENSG00000102763.11	VWA8	0.275936	1.93502e-06
ENSG00000105967.11	TFEC	-0.429293	1.93621e-06
ENSG00000137760.10	ALKBH8	-0.495932	1.93621e-06
ENSG00000165672.5	PRDX3	-0.287098	1.93621e-06
ENSG00000119185.8	ITGB1BP1	-0.352247	1.93858e-06
ENSG00000148187.13	MRRF	-0.368958	1.94289e-06
ENSG00000129757.8	CDKN1C	0.767299	1.95182e-06
ENSG00000154229.7	PRKCA	0.490399	1.95958e-06
ENSG00000172216.4	CEBPB	0.510543	1.96716e-06
ENSG00000197860.5	SGTB	0.698614	1.96716e-06
ENSG00000163362.6	C1orf106	-0.485748	1.99584e-06
ENSG00000001084.6	GCLC	0.530159	1.99876e-06
ENSG00000114631.10	PODXL2	-0.762694	2.01899e-06
ENSG00000126003.6	PLAGL2	-0.485155	2.02641e-06
ENSG00000138376.6	BARD1	-0.286348	2.04951e-06
ENSG00000135164.14	DMTF1	0.36175	2.07941e-06
ENSG00000019102.7	VSIG2	0.62065	2.13361e-06
ENSG00000085449.10	WDFY1	-0.359097	2.17253e-06
ENSG00000148229.8	POLE3	-0.413275	2.17361e-06
ENSG00000166128.8	RAB8B	0.581297	2.17361e-06
ENSG00000115053.11	NCL	-0.529668	2.17558e-06
ENSG00000181218.4	HIST3H2A	-0.740646	2.21468e-06
ENSG00000169598.11	DFFB	-0.505121	2.21741e-06
ENSG00000104472.5	CHRAC1	-0.444175	2.35023e-06
ENSG00000137841.7	PLCB2	0.357948	2.37975e-06
ENSG00000105048.12	TNNT1	-1.02105	2.39192e-06
ENSG00000025293.11	PHF20	0.257712	2.41182e-06
ENSG00000179941.6	BBS10	0.567274	2.4162e-06
ENSG00000086061.11	DNAJA1	-0.250399	2.42075e-06
ENSG00000107833.6	NPM3	-0.759098	2.42906e-06
ENSG00000132341.7	RAN	-0.32653	2.43819e-06
ENSG00000172508.6	CARNS1	0.573035	2.46235e-06
ENSG00000107077.13	KDM4C	0.277796	2.49603e-06
ENSG00000118762.3	PKD2	0.296002	2.49603e-06
ENSG00000166130.10	IKBIP	-0.388053	2.49603e-06
ENSG00000103313.7	MEFV	0.482378	2.51195e-06
ENSG00000149547.10	EI24	-0.434321	2.51457e-06
ENSG00000180818.4	HOXC10	-1.91302	2.52228e-06
ENSG00000168944.11	CEP120	-0.305506	2.52268e-06
ENSG00000138029.9	HADHB	0.215117	2.56189e-06
ENSG00000197043.9	ANXA6	-0.534069	2.56539e-06
ENSG00000197779.9	ZNF81	0.397884	2.58785e-06
ENSG00000118707.5	TGIF2	-0.475057	2.59138e-06
ENSG00000086289.7	EPDR1	-0.578142	2.61174e-06
ENSG00000173542.4	MOB1B	0.529931	2.61223e-06
ENSG00000147224.6	PRPS1	-0.37519	2.65267e-06
ENSG00000096968.8	JAK2	0.39565	2.67007e-06
ENSG00000164104.7	HMGB2	-0.560066	2.67007e-06
ENSG00000100647.7	KIAA0247	0.286296	2.68355e-06
ENSG00000165119.14	HNRNPK	-0.27144	2.71185e-06
ENSG00000198185.7	ZNF334	0.447579	2.71329e-06
ENSG00000125347.9	IRF1	0.329245	2.72803e-06
ENSG00000085511.15	MAP3K4	-0.297009	2.77182e-06
ENSG00000239713.3	APOBEC3G	0.391065	2.77427e-06
ENSG00000198668.6	CALM1	0.314355	2.79415e-06
ENSG00000197471.7	SPN	-0.418706	2.79868e-06
ENSG00000185305.6	ARL15	0.655157	2.82033e-06
ENSG00000097021.15	ACOT7	-0.652349	2.82353e-06
ENSG00000137070.13	IL11RA	0.764702	2.82353e-06
ENSG00000142453.7	CARM1	-0.583905	2.82353e-06
ENSG00000181830.7	SLC35C1	-0.439089	2.82353e-06
ENSG00000121579.8	NAA50	-0.240346	2.86878e-06
ENSG00000085231.9	TAF9	-0.421506	2.86953e-06
ENSG00000184825.4	HIST1H2AH	-0.838858	2.86998e-06
ENSG00000090520.6	DNAJB11	-0.377243	2.88073e-06
ENSG00000113810.11	SMC4	-0.260956	2.89436e-06
ENSG00000120451.6	SNX19	0.26349	2.90066e-06
ENSG00000143851.11	PTPN7	-0.518984	2.93043e-06
ENSG00000138614.10	VWA9	-0.292997	3.01634e-06
ENSG00000055483.15	USP36	-0.435155	3.0322e-06
ENSG00000100197.16	CYP2D6	0.704328	3.05671e-06
ENSG00000204217.8	BMPR2	0.640848	3.07605e-06
ENSG00000143847.11	PPFIA4	0.477331	3.0848e-06
ENSG00000104980.3	TIMM44	-0.546882	3.08552e-06
ENSG00000004468.8	CD38	0.496784	3.11348e-06
ENSG00000160214.8	RRP1	-0.539127	3.13147e-06
ENSG00000182179.6	UBA7	0.279367	3.13147e-06
ENSG00000204394.8	VARS	-0.515984	3.14087e-06
ENSG00000157388.9	CACNA1D	-1.1756	3.19703e-06
ENSG00000104043.10	ATP8B4	0.346911	3.20518e-06
ENSG00000122859.4	NEUROG3	-0.657599	3.21056e-06
ENSG00000164134.8	NAA15	-0.249275	3.21056e-06
ENSG00000161267.7	BDH1	-0.520399	3.21359e-06
ENSG00000138080.9	EMILIN1	-0.79928	3.21789e-06
ENSG00000100271.12	TTLL1	0.521177	3.22231e-06
ENSG00000187676.7	B3GALTL	-0.650134	3.23453e-06
ENSG00000156381.4	ANKRD9	-0.55002	3.23717e-06
ENSG00000251322.3	SHANK3	-0.673036	3.23745e-06
ENSG00000135317.8	SNX14	0.353608	3.24089e-06
ENSG00000171794.3	UTF1	-1.24083	3.3178e-06
ENSG00000161996.13	WDR90	-0.500174	3.36433e-06
ENSG00000083799.13	CYLD	0.376722	3.39551e-06
ENSG00000254827.1	SLC22A18AS	1.17247	3.41907e-06
ENSG00000167994.7	RAB3IL1	-2.08216	3.45437e-06
ENSG00000090006.13	LTBP4	-0.264693	3.46162e-06
ENSG00000136492.4	BRIP1	-0.37413	3.485e-06
ENSG00000196275.9	GTF2IRD2	1.0729	3.485e-06
ENSG00000099338.18	CATSPERG	0.767974	3.49965e-06
ENSG00000163536.8	SERPINI1	1.08586	3.50565e-06
ENSG00000107890.12	ANKRD26	0.374236	3.63003e-06
ENSG00000164076.12	CAMKV	-2.46271	3.63003e-06
ENSG00000170128.2	GPR25	-1.84804	3.63614e-06
ENSG00000182923.12	CEP63	0.311951	3.64986e-06
ENSG00000168255.14	POLR2J3	0.403369	3.65877e-06
ENSG00000155254.8	MARVELD1	-0.496904	3.68546e-06
ENSG00000143384.8	MCL1	0.325309	3.69239e-06
ENSG00000125657.3	TNFSF9	0.659077	3.69869e-06
ENSG00000197459.2	HIST1H2BH	-0.823718	3.77566e-06
ENSG00000183773.11	AIFM3	0.491882	3.78377e-06
ENSG00000075234.12	TTC38	0.317953	3.80515e-06
ENSG00000101544.4	ADNP2	-0.331222	3.84111e-06
ENSG00000131725.9	WDR44	0.445913	3.85848e-06
ENSG00000168209.4	DDIT4	0.751581	3.86687e-06
ENSG00000163683.7	SMIM14	0.937912	3.93125e-06
ENSG00000086598.6	TMED2	-0.301676	3.94221e-06
ENSG00000140743.3	CDR2	-0.455382	3.95742e-06
ENSG00000173674.6	EIF1AX	-0.28029	3.96389e-06
ENSG00000111653.15	ING4	0.3592	3.96729e-06
ENSG00000185252.13	ZNF74	-0.389579	3.96729e-06
ENSG00000138092.6	CENPO	-0.548563	3.97889e-06
ENSG00000105197.6	TIMM50	-0.527264	4.03636e-06
ENSG00000085117.7	CD82	0.461626	4.05096e-06
ENSG00000204856.7	FAM216A	-0.576719	4.06351e-06
ENSG00000105447.8	GRWD1	-0.52774	4.08963e-06
ENSG00000112276.9	BVES	0.738277	4.0945e-06
ENSG00000164707.11	SLC13A4	0.759758	4.10749e-06
ENSG00000180263.9	FGD6	0.997642	4.1654e-06
ENSG00000118960.8	HS1BP3	0.39487	4.16585e-06
ENSG00000107789.11	MINPP1	0.415568	4.23428e-06
ENSG00000123505.10	AMD1	-0.246873	4.23428e-06
ENSG00000149054.10	ZNF215	-1.32156	4.25534e-06
ENSG00000130881.9	LRP3	-0.525826	4.27232e-06
ENSG00000168274.3	HIST1H2AE	-0.828642	4.28755e-06
ENSG00000089916.13	GPATCH2L	0.279843	4.30743e-06
ENSG00000140451.8	PIF1	-0.771744	4.49712e-06
ENSG00000157657.10	ZNF618	-0.443542	4.54751e-06
ENSG00000137802.9	MAPKBP1	0.337383	4.57044e-06
ENSG00000132763.10	MMACHC	-0.501587	4.6349e-06
ENSG00000121671.7	CRY2	0.373211	4.63941e-06
ENSG00000005100.8	DHX33	-0.438772	4.63999e-06
ENSG00000184293.3	CLECL1	-0.496738	4.70373e-06
ENSG00000091317.7	CMTM6	0.46511	4.71312e-06
ENSG00000178537.5	SLC25A20	0.492978	4.97863e-06
ENSG00000122203.10	KIAA1191	0.319683	4.99068e-06
ENSG00000266714.2	MYO15B	0.452305	5.00261e-06
ENSG00000127418.10	FGFRL1	-0.461136	5.07073e-06
ENSG00000247077.2	PGAM5	-0.525392	5.07231e-06
ENSG00000175711.4	B3GNTL1	-0.353555	5.1473e-06
ENSG00000008869.7	HEATR5B	0.294825	5.18578e-06
ENSG00000105173.9	CCNE1	-0.410499	5.27153e-06
ENSG00000132382.10	MYBBP1A	-0.582049	5.36224e-06
ENSG00000148840.6	PPRC1	-0.572462	5.36576e-06
ENSG00000251192.3	ZNF674	0.711692	5.39121e-06
ENSG00000213865.3	C8orf44	0.539735	5.44943e-06
ENSG00000091483.6	FH	-0.431265	5.45679e-06
ENSG00000083097.10	DOPEY1	0.488056	5.50053e-06
ENSG00000173597.4	SULT1B1	-1.1403	5.58619e-06
ENSG00000126500.3	FLRT1	-0.778785	5.66083e-06
ENSG00000155629.10	PIK3AP1	-0.294105	5.72312e-06
ENSG00000133731.5	IMPA1	0.435651	5.74552e-06
ENSG00000163322.9	FAM175A	0.451698	5.75505e-06
ENSG00000100221.6	JOSD1	-0.381915	5.76292e-06
ENSG00000163516.9	ANKZF1	0.345722	5.76845e-06
ENSG00000127980.11	PEX1	0.436301	5.76971e-06
ENSG00000154889.12	MPPE1	0.399133	5.77296e-06
ENSG00000126067.7	PSMB2	-0.368805	5.79291e-06
ENSG00000141873.6	SLC39A3	-0.631726	5.81585e-06
ENSG00000137274.8	BPHL	0.618918	5.82855e-06
ENSG00000186792.11	HYAL3	-0.639612	5.96452e-06
ENSG00000136826.10	KLF4	0.822813	5.96951e-06
ENSG00000141012.8	GALNS	0.316703	5.97745e-06
ENSG00000114439.14	BBX	-0.325324	6.02792e-06
ENSG00000132950.14	ZMYM5	0.334979	6.10475e-06
ENSG00000179958.4	DCTPP1	-0.589263	6.1324e-06
ENSG00000160161.5	CILP2	-1.41411	6.15897e-06
ENSG00000164338.5	UTP15	-0.349985	6.21447e-06
ENSG00000130810.15	PPAN	-0.630949	6.22077e-06
ENSG00000112992.12	NNT	-0.292377	6.26276e-06
ENSG00000189233.7	NUGGC	2.04379	6.26636e-06
ENSG00000196505.6	GDAP2	0.308344	6.31965e-06
ENSG00000008838.13	MED24	-0.452063	6.35668e-06
ENSG00000132424.10	PNISR	0.337032	6.36069e-06
ENSG00000141576.10	RNF157	-0.747954	6.51857e-06
ENSG00000119471.10	HSDL2	0.317356	6.55231e-06
ENSG00000163110.10	PDLIM5	0.626956	6.60144e-06
ENSG00000125384.6	PTGER2	-0.813125	6.61079e-06
ENSG00000164466.8	SFXN1	-0.387919	6.61728e-06
ENSG00000181790.6	BAI1	0.578622	6.63903e-06
ENSG00000011295.11	TTC19	0.298273	6.6584e-06
ENSG00000110841.9	PPFIBP1	0.586453	6.67246e-06
ENSG00000135929.4	CYP27A1	1.342	6.67246e-06
ENSG00000132507.13	EIF5A	-0.57352	6.68639e-06
ENSG00000158292.6	GPR153	-0.411151	6.68981e-06
ENSG00000167748.6	KLK1	-1.25891	6.73752e-06
ENSG00000062598.13	ELMO2	0.278689	6.82486e-06
ENSG00000184922.9	FMNL1	-0.563975	6.84439e-06
ENSG00000176890.11	TYMS	-0.360831	6.97246e-06
ENSG00000123268.4	ATF1	-0.302315	7.00265e-06
ENSG00000166965.8	RCCD1	-0.432142	7.02537e-06
ENSG00000100401.15	RANGAP1	-0.513832	7.14798e-06
ENSG00000170917.9	NUDT6	0.521599	7.16595e-06
ENSG00000145217.9	SLC26A1	0.436423	7.20341e-06
ENSG00000135845.5	PIGC	-0.379554	7.20644e-06
ENSG00000138073.9	PREB	-0.536557	7.20644e-06
ENSG00000197409.6	HIST1H3D	-0.85022	7.2084e-06
ENSG00000102699.5	PARP4	0.191621	7.28903e-06
ENSG00000138346.10	DNA2	-0.394186	7.34222e-06
ENSG00000122140.6	MRPS2	-0.658714	7.37584e-06
ENSG00000160193.7	WDR4	-0.651476	7.40625e-06
ENSG00000141314.8	RHBDL3	0.739234	7.41703e-06
ENSG00000089818.12	NECAP1	0.388573	7.4312e-06
ENSG00000105202.3	FBL	-0.550452	7.46052e-06
ENSG00000154727.6	GABPA	-0.329753	7.47103e-06
ENSG00000167315.13	ACAA2	-0.53755	7.50638e-06
ENSG00000069974.11	RAB27A	-0.514622	7.67597e-06
ENSG00000176946.7	THAP4	-0.565841	7.7862e-06
ENSG00000106780.7	MEGF9	0.420525	7.82516e-06
ENSG00000134222.12	PSRC1	-0.687225	7.82516e-06
ENSG00000011523.9	CEP68	0.324705	8.08374e-06
ENSG00000133169.5	BEX1	-0.669226	8.12506e-06
ENSG00000113240.8	CLK4	0.354189	8.22281e-06
ENSG00000145545.7	SRD5A1	0.733115	8.23903e-06
ENSG00000173064.6	HECTD4	0.315043	8.35936e-06
ENSG00000165322.13	ARHGAP12	0.529636	8.36998e-06
ENSG00000170779.10	CDCA4	-0.572442	8.4123e-06
ENSG00000186635.10	ARAP1	0.314546	8.6029e-06
ENSG00000166037.6	CEP57	-0.26145	8.63031e-06
ENSG00000075407.13	ZNF37A	-0.425707	8.69824e-06
ENSG00000198915.7	RASGEF1A	-1.47854	8.723e-06
ENSG00000080608.9	KIAA0020	-0.3713	8.72305e-06
ENSG00000078747.8	ITCH	0.319872	8.75287e-06
ENSG00000136240.5	KDELR2	-0.248847	8.77194e-06
ENSG00000140526.12	ABHD2	0.271187	8.80578e-06
ENSG00000255103.1	KIAA0754	-0.47879	8.95467e-06
ENSG00000172336.4	POP7	-0.656291	9.04742e-06
ENSG00000073146.11	MOV10L1	0.711965	9.07798e-06
ENSG00000162849.11	KIF26B	0.54814	9.08936e-06
ENSG00000157823.12	AP3S2	0.443804	9.09473e-06
ENSG00000125869.5	LAMP5	-0.394643	9.19926e-06
ENSG00000108669.12	CYTH1	0.297887	9.28112e-06
ENSG00000178966.11	RMI1	-0.305466	9.29764e-06
ENSG00000136051.9	KIAA1033	0.451822	9.30512e-06
ENSG00000182180.9	MRPS16	-0.376218	9.30512e-06
ENSG00000170222.11	ADPRM	0.463718	9.37012e-06
ENSG00000173207.8	CKS1B	-0.470186	9.38434e-06
ENSG00000196550.6	FAM72A	-0.618623	9.38434e-06
ENSG00000188626.5	GOLGA8M	0.33776	9.43583e-06
ENSG00000100294.8	MCAT	-0.509329	9.51709e-06
ENSG00000102172.11	SMS	-0.269126	9.53359e-06
ENSG00000197302.6	ZNF720	0.397784	9.5364e-06
ENSG00000127804.8	METTL16	-0.303937	9.55231e-06
ENSG00000161692.13	DBF4B	-0.566567	9.55231e-06
ENSG00000168291.8	PDHB	0.289318	9.58098e-06
ENSG00000130363.7	RSPH3	0.514099	9.59413e-06
ENSG00000113971.14	NPHP3	0.547096	9.66737e-06
ENSG00000165731.13	RET	-1.06646	9.67725e-06
ENSG00000135213.8	POM121C	-0.486775	9.70417e-06
ENSG00000157557.7	ETS2	-0.399871	9.73194e-06
ENSG00000185269.7	NOTUM	-1.36534	9.74064e-06
ENSG00000100285.9	NEFH	-0.739982	9.78154e-06
ENSG00000152475.6	ZNF837	0.632712	9.78154e-06
ENSG00000141504.7	SAT2	0.515579	9.88185e-06
ENSG00000136819.10	C9orf78	-0.473472	9.89015e-06
ENSG00000137185.7	ZSCAN9	0.353163	9.92088e-06
ENSG00000184990.8	SIVA1	-0.516354	9.92088e-06
ENSG00000196072.7	BLOC1S2	0.412884	9.93571e-06
ENSG00000147162.9	OGT	0.306312	9.98884e-06
ENSG00000205930.4	C21orf49	1.14403	9.98884e-06
ENSG00000122042.9	UBL3	0.39009	9.99191e-06
ENSG00000132953.12	XPO4	-0.323535	1.00197e-05
ENSG00000120915.9	EPHX2	0.701717	1.003e-05
ENSG00000128699.9	ORMDL1	0.352977	1.00779e-05
ENSG00000125149.7	C16orf70	0.344544	1.01204e-05
ENSG00000167693.12	NXN	0.773549	1.01204e-05
ENSG00000137692.7	DCUN1D5	-0.340039	1.01296e-05
ENSG00000035928.10	RFC1	-0.206989	1.01634e-05
ENSG00000154265.11	ABCA5	0.686954	1.02437e-05
ENSG00000025708.8	TYMP	0.40532	1.03415e-05
ENSG00000187837.2	HIST1H1C	-0.729471	1.03694e-05
ENSG00000085224.16	ATRX	0.382043	1.03791e-05
ENSG00000172339.9	ALG14	-0.89376	1.04125e-05
ENSG00000205213.9	LGR4	-0.465223	1.04311e-05
ENSG00000131462.3	TUBG1	-0.605536	1.04592e-05
ENSG00000105323.12	HNRNPUL1	-0.482765	1.05057e-05
ENSG00000124216.3	SNAI1	0.814719	1.05203e-05
ENSG00000183684.6	ALYREF	-0.668372	1.05203e-05
ENSG00000184162.10	NR2C2AP	-0.6028	1.05203e-05
ENSG00000169508.6	GPR183	-1.03513	1.07008e-05
ENSG00000066084.8	DIP2B	0.206588	1.08864e-05
ENSG00000104972.10	LILRB1	0.526656	1.10148e-05
ENSG00000147872.5	PLIN2	-0.377972	1.13326e-05
ENSG00000068971.9	PPP2R5B	0.537207	1.16392e-05
ENSG00000260001.2	TGFBR3L	-0.982965	1.17651e-05
ENSG00000116198.8	CEP104	0.250044	1.17701e-05
ENSG00000183955.8	SETD8	-0.381111	1.17964e-05
ENSG00000119383.15	PPP2R4	-0.357741	1.18051e-05
ENSG00000135632.7	SMYD5	-0.568367	1.18051e-05
ENSG00000176087.10	SLC35A4	-0.454061	1.19736e-05
ENSG00000048162.15	NOP16	-0.645513	1.20711e-05
ENSG00000118816.5	CCNI	0.212726	1.22178e-05
ENSG00000090273.9	NUDC	-0.391381	1.23193e-05
ENSG00000164574.11	GALNT10	0.348076	1.24583e-05
ENSG00000111452.8	GPR133	1.90642	1.24791e-05
ENSG00000149476.10	DAK	0.341429	1.25164e-05
ENSG00000138604.5	GLCE	0.362715	1.25207e-05
ENSG00000105186.10	ANKRD27	-0.435777	1.25378e-05
ENSG00000162521.14	RBBP4	-0.265958	1.25682e-05
ENSG00000167123.14	CERCAM	-0.530079	1.25909e-05
ENSG00000196415.5	PRTN3	-0.82031	1.26001e-05
ENSG00000093167.13	LRRFIP2	0.306937	1.26131e-05
ENSG00000107290.9	SETX	0.243663	1.28113e-05
ENSG00000154814.9	OXNAD1	-0.344481	1.28113e-05
ENSG00000144815.10	NXPE3	0.283084	1.29394e-05
ENSG00000177614.5	PGBD5	-0.901745	1.2942e-05
ENSG00000176014.8	TUBB6	-0.684189	1.30964e-05
ENSG00000168297.11	PXK	-0.300338	1.31272e-05
ENSG00000131398.9	KCNC3	0.520384	1.3193e-05
ENSG00000166086.8	JAM3	-0.530698	1.31987e-05
ENSG00000101361.10	NOP56	-0.473364	1.31999e-05
ENSG00000138814.12	PPP3CA	0.304508	1.31999e-05
ENSG00000103202.8	NME4	-0.753796	1.32045e-05
ENSG00000163346.12	PBXIP1	0.429297	1.34047e-05
ENSG00000133265.6	HSPBP1	-0.418354	1.35157e-05
ENSG00000100426.6	ZBED4	-0.40599	1.36259e-05
ENSG00000134594.4	RAB33A	-0.47998	1.36427e-05
ENSG00000130150.7	MOSPD2	0.429983	1.37319e-05
ENSG00000169032.5	MAP2K1	0.269004	1.37364e-05
ENSG00000159753.9	RLTPR	-1.15203	1.37492e-05
ENSG00000160957.8	RECQL4	-0.449537	1.40238e-05
ENSG00000115145.5	STAM2	0.345051	1.41167e-05
ENSG00000138780.10	GSTCD	-0.347422	1.42058e-05
ENSG00000111897.6	SERINC1	0.378037	1.42872e-05
ENSG00000223547.5	ZNF844	1.02058	1.43079e-05
ENSG00000144118.9	RALB	0.348541	1.4328e-05
ENSG00000186660.14	ZFP91	-0.318942	1.43496e-05
ENSG00000143889.11	HNRNPLL	0.281731	1.43645e-05
ENSG00000010310.4	GIPR	0.764967	1.43787e-05
ENSG00000102871.11	TRADD	0.374134	1.48712e-05
ENSG00000197283.8	SYNGAP1	-0.397074	1.48955e-05
ENSG00000153989.7	NUS1	-0.345265	1.50376e-05
ENSG00000130204.8	TOMM40	-0.615676	1.51109e-05
ENSG00000145675.10	PIK3R1	0.262664	1.51624e-05
ENSG00000149927.13	DOC2A	-0.799811	1.51624e-05
ENSG00000137713.11	PPP2R1B	-0.235607	1.51947e-05
ENSG00000183023.14	SLC8A1	1.32541	1.52827e-05
ENSG00000188001.5	TPRG1	-1.3852	1.52919e-05
ENSG00000118363.7	SPCS2	-0.296306	1.52992e-05
ENSG00000187840.4	EIF4EBP1	-0.739723	1.5555e-05
ENSG00000134256.8	CD101	-1.03097	1.56258e-05
ENSG00000027697.8	IFNGR1	0.376165	1.58283e-05
ENSG00000136536.10	MARCH7	0.333777	1.58361e-05
ENSG00000116273.5	PHF13	-0.3629	1.58564e-05
ENSG00000172322.9	CLEC12A	-1.7021	1.59247e-05
ENSG00000103591.8	AAGAB	0.249451	1.59761e-05
ENSG00000171988.13	JMJD1C	0.319722	1.60103e-05
ENSG00000047346.8	FAM214A	0.65424	1.6066e-05
ENSG00000068793.13	CYFIP1	0.32576	1.61083e-05
ENSG00000135823.9	STX6	0.281019	1.61505e-05
ENSG00000089248.6	ERP29	-0.54389	1.61674e-05
ENSG00000135924.11	DNAJB2	0.562768	1.61701e-05
ENSG00000074416.9	MGLL	-0.556103	1.61708e-05
ENSG00000136045.7	PWP1	-0.324465	1.61708e-05
ENSG00000174173.6	TRMT10C	-0.297562	1.64546e-05
ENSG00000178199.9	ZC3H12D	-0.628148	1.64712e-05
ENSG00000160298.13	C21orf58	-0.452088	1.64825e-05
ENSG00000173473.6	SMARCC1	-0.379185	1.65071e-05
ENSG00000107816.13	LZTS2	-0.418864	1.68395e-05
ENSG00000169926.5	KLF13	0.317554	1.68657e-05
ENSG00000170439.5	METTL7B	-1.21739	1.68851e-05
ENSG00000112685.9	EXOC2	0.27033	1.68927e-05
ENSG00000162972.6	C2orf47	-0.418776	1.69933e-05
ENSG00000117395.6	EBNA1BP2	-0.45436	1.70072e-05
ENSG00000172172.3	MRPL13	-0.278617	1.70506e-05
ENSG00000140400.10	MAN2C1	0.401474	1.70637e-05
ENSG00000129534.9	MIS18BP1	-0.299078	1.7083e-05
ENSG00000203813.4	HIST1H3H	-0.820035	1.70868e-05
ENSG00000186416.8	NKRF	-0.347679	1.71957e-05
ENSG00000164332.6	UBLCP1	0.407975	1.72728e-05
ENSG00000156170.8	NDUFAF6	-0.296937	1.73475e-05
ENSG00000173230.11	GOLGB1	0.273943	1.73594e-05
ENSG00000108588.9	CCDC47	-0.185812	1.76751e-05
ENSG00000060971.13	ACAA1	0.412298	1.77553e-05
ENSG00000145632.10	PLK2	0.528023	1.77553e-05
ENSG00000168268.6	NT5DC2	-0.591739	1.77553e-05
ENSG00000166133.13	RPUSD2	-0.581234	1.77799e-05
ENSG00000125375.10	ATP5S	0.33206	1.78092e-05
ENSG00000100422.9	CERK	-0.280949	1.79879e-05
ENSG00000120253.9	NUP43	-0.220521	1.80098e-05
ENSG00000131668.9	BARX1	-1.5598	1.82413e-05
ENSG00000129187.10	DCTD	-0.257781	1.83977e-05
ENSG00000124126.9	PREX1	0.321921	1.84082e-05
ENSG00000179750.11	APOBEC3B	-0.568845	1.86372e-05
ENSG00000198576.2	ARC	2.56748	1.86372e-05
ENSG00000106003.8	LFNG	0.459678	1.86767e-05
ENSG00000157778.4	PSMG3	-0.466597	1.86767e-05
ENSG00000034053.10	APBA2	-0.76344	1.88987e-05
ENSG00000178074.5	C2orf69	-0.318286	1.90465e-05
ENSG00000108106.9	UBE2S	-0.735538	1.90953e-05
ENSG00000129484.9	PARP2	-0.390926	1.93313e-05
ENSG00000130856.11	ZNF236	-0.343905	1.93773e-05
ENSG00000106554.7	CHCHD3	-0.407122	1.94101e-05
ENSG00000021355.8	SERPINB1	0.382651	1.94879e-05
ENSG00000162576.12	MXRA8	0.536008	1.97872e-05
ENSG00000067533.5	RRP15	-0.342717	1.98781e-05
ENSG00000130766.4	SESN2	0.551297	1.98919e-05
ENSG00000166822.8	TMEM170A	0.331864	1.99684e-05
ENSG00000137103.12	TMEM8B	0.594535	2.02139e-05
ENSG00000165609.8	NUDT5	-0.35472	2.04375e-05
ENSG00000101115.8	SALL4	-1.11217	2.05097e-05
ENSG00000185338.4	SOCS1	0.766533	2.05359e-05
ENSG00000197256.6	KANK2	0.32149	2.06022e-05
ENSG00000197930.8	ERO1L	-0.304678	2.07218e-05
ENSG00000185090.10	MANEAL	-0.577759	2.07804e-05
ENSG00000003402.15	CFLAR	0.35431	2.08096e-05
ENSG00000132313.10	MRPL35	-0.252007	2.09351e-05
ENSG00000139946.5	PELI2	0.458214	2.09594e-05
ENSG00000137200.8	CMTR1	0.242686	2.09616e-05
ENSG00000172000.3	ZNF556	-1.07003	2.09616e-05
ENSG00000116221.11	MRPL37	-0.488783	2.10061e-05
ENSG00000184678.8	HIST2H2BE	-0.707905	2.10576e-05
ENSG00000124098.9	FAM210B	0.425789	2.10664e-05
ENSG00000164331.5	ANKRA2	0.393818	2.10819e-05
ENSG00000011304.12	PTBP1	-0.453716	2.12687e-05
ENSG00000100767.11	PAPLN	0.506684	2.12687e-05
ENSG00000240038.2	AMY2B	0.565334	2.12843e-05
ENSG00000078967.8	UBE2D4	0.409686	2.14445e-05
ENSG00000156869.8	FRRS1	0.563832	2.1645e-05
ENSG00000030582.12	GRN	0.380879	2.17866e-05
ENSG00000163510.9	CWC22	-0.293248	2.24532e-05
ENSG00000115241.9	PPM1G	-0.497939	2.25804e-05
ENSG00000149100.8	EIF3M	-0.181026	2.25804e-05
ENSG00000128881.12	TTBK2	0.234206	2.26158e-05
ENSG00000188938.11	FAM120AOS	0.347637	2.26701e-05
ENSG00000106462.6	EZH2	-0.361819	2.28326e-05
ENSG00000100811.6	YY1	-0.223416	2.29136e-05
ENSG00000175482.4	POLD4	0.598527	2.30494e-05
ENSG00000080709.10	KCNN2	-0.443323	2.31704e-05
ENSG00000197965.7	MPZL1	-0.40792	2.31726e-05
ENSG00000185518.7	SV2B	-0.923219	2.32852e-05
ENSG00000078124.7	ACER3	0.377828	2.3317e-05
ENSG00000128228.4	SDF2L1	-0.739116	2.34848e-05
ENSG00000133246.7	PRAM1	0.756572	2.35117e-05
ENSG00000109572.9	CLCN3	0.312833	2.37136e-05
ENSG00000197622.8	CDC42SE1	0.199921	2.37136e-05
ENSG00000187951.6	ARHGAP11B	-0.424214	2.38009e-05
ENSG00000164111.10	ANXA5	0.370403	2.38255e-05
ENSG00000179041.2	RRS1	-0.52051	2.38599e-05
ENSG00000196782.8	MAML3	0.364348	2.41833e-05
ENSG00000111676.10	ATN1	-0.22189	2.42182e-05
ENSG00000138600.5	SPPL2A	0.336392	2.43283e-05
ENSG00000070614.10	NDST1	-0.527337	2.45166e-05
ENSG00000056558.6	TRAF1	0.560539	2.45591e-05
ENSG00000134962.6	KLB	-1.08899	2.48503e-05
ENSG00000197846.3	HIST1H2BF	-0.803089	2.48828e-05
ENSG00000092931.7	MFSD11	0.461529	2.49052e-05
ENSG00000178935.5	ZNF552	0.452289	2.49052e-05
ENSG00000171509.11	RXFP1	-1.11864	2.50513e-05
ENSG00000079459.8	FDFT1	-0.410839	2.52387e-05
ENSG00000152804.6	HHEX	0.296403	2.53781e-05
ENSG00000144840.4	RABL3	-0.281554	2.53829e-05
ENSG00000099622.9	CIRBP	0.357624	2.55726e-05
ENSG00000167088.6	SNRPD1	-0.402373	2.57545e-05
ENSG00000079277.15	MKNK1	0.374376	2.58077e-05
ENSG00000205358.3	MT1H	-1.96638	2.62592e-05
ENSG00000182934.7	SRPR	-0.318542	2.63527e-05
ENSG00000170606.9	HSPA4	-0.270194	2.63777e-05
ENSG00000081791.4	KIAA0141	0.311635	2.68658e-05
ENSG00000133773.7	CCDC59	-0.385562	2.70144e-05
ENSG00000145041.11	VPRBP	-0.314611	2.71955e-05
ENSG00000101849.11	TBL1X	-0.321966	2.72394e-05
ENSG00000100554.7	ATP6V1D	0.289269	2.73227e-05
ENSG00000182149.16	IST1	0.215341	2.74945e-05
ENSG00000104375.11	STK3	0.378845	2.75155e-05
ENSG00000196747.3	HIST1H2AI	-0.809264	2.78281e-05
ENSG00000244165.1	P2RY11	-0.481946	2.78281e-05
ENSG00000163170.7	BOLA3	-0.519525	2.80624e-05
ENSG00000159200.13	RCAN1	-0.425182	2.82809e-05
ENSG00000179886.4	TIGD5	-0.521959	2.83787e-05
ENSG00000131724.6	IL13RA1	0.3372	2.85023e-05
ENSG00000149212.6	SESN3	0.510904	2.89469e-05
ENSG00000239779.2	WBP1	0.500389	2.89616e-05
ENSG00000166398.8	KIAA0355	0.487846	2.90583e-05
ENSG00000137038.7	TMEM261	-0.411681	2.92617e-05
ENSG00000133706.13	LARS	-0.263491	2.94685e-05
ENSG00000120162.9	MOB3B	0.590286	2.94849e-05
ENSG00000142230.7	SAE1	-0.427967	2.95522e-05
ENSG00000189227.4	C15orf61	-0.584996	2.95836e-05
ENSG00000165283.11	STOML2	-0.46839	2.98141e-05
ENSG00000013573.12	DDX11	-0.390454	2.9845e-05
ENSG00000198558.2	HIST1H4L	-1.22768	3.02117e-05
ENSG00000132361.12	CLUH	-0.567429	3.0264e-05
ENSG00000101255.6	TRIB3	-0.704101	3.02936e-05
ENSG00000172840.2	PDP2	-0.582055	3.02936e-05
ENSG00000119820.6	YIPF4	0.311385	3.08732e-05
ENSG00000020633.14	RUNX3	-0.486813	3.14035e-05
ENSG00000131876.12	SNRPA1	-0.288839	3.14199e-05
ENSG00000167578.12	RAB4B	0.436466	3.15814e-05
ENSG00000179115.6	FARSA	-0.545287	3.21353e-05
ENSG00000147416.6	ATP6V1B2	0.203867	3.21391e-05
ENSG00000173141.4	MRP63	-0.563013	3.23254e-05
ENSG00000171421.8	MRPL36	-0.584349	3.24505e-05
ENSG00000168259.10	DNAJC7	-0.318307	3.24787e-05
ENSG00000170385.9	SLC30A1	0.340358	3.2497e-05
ENSG00000152422.11	XRCC4	-0.404066	3.25766e-05
ENSG00000164597.9	COG5	0.254619	3.25766e-05
ENSG00000130713.11	EXOSC2	-0.422749	3.26888e-05
ENSG00000160818.12	GPATCH4	-0.523254	3.27523e-05
ENSG00000089327.10	FXYD5	-0.81378	3.27661e-05
ENSG00000115806.8	GORASP2	-0.336428	3.30395e-05
ENSG00000149564.7	ESAM	1.34596	3.32596e-05
ENSG00000075391.12	RASAL2	0.196493	3.32924e-05
ENSG00000196365.7	LONP1	-0.549424	3.35672e-05
ENSG00000163257.6	DCAF16	-0.301036	3.35903e-05
ENSG00000083223.13	ZCCHC6	0.242264	3.39176e-05
ENSG00000149257.9	SERPINH1	-0.519654	3.40155e-05
ENSG00000145687.11	SSBP2	0.501238	3.40259e-05
ENSG00000152104.7	PTPN14	-0.442298	3.41905e-05
ENSG00000138658.11	C4orf21	-0.385955	3.42032e-05
[truncated: 13,534 more rows]
