# Supplementary material for: Ribosome subunit attrition and activation of the p53–MDM4 axis dominate the response of MLL-rearranged cancer cells to WDR5 WIN site inhibition
Source: eLife. 2024 Apr 29;12:RP90683. doi: 10.7554/eLife.90683 (PMC11057873; doi:10.7554/eLife.90683)
Supplement: Figure 6—source data 6. [file elife-90683-fig6-data6.xlsx]

## Sheet: DMSO KO vs NT
Feature	Feature_gene_name	log2FoldChange	padj
ENSG00000163584.13	RPL22L1	1.44842	0
ENSG00000133055.4	MYBPH	0.953924	7.91511e-83
ENSG00000133048.8	CHI3L1	0.859746	4.87526e-54
ENSG00000152104.7	PTPN14	-0.548361	8.05976e-51
ENSG00000004468.8	CD38	1.1929	6.46265e-48
ENSG00000091490.6	SEL1L3	0.51276	1.24908e-44
ENSG00000142583.13	SLC2A5	0.672247	1.18197e-34
ENSG00000158258.11	CLSTN2	-0.476115	3.09541e-33
ENSG00000227706.3	RP11-301G19.1	0.558377	1.02901e-32
ENSG00000152784.11	PRDM8	-0.649158	1.11225e-29
ENSG00000022267.12	FHL1	-0.607716	2.62155e-29
ENSG00000161681.11	SHANK1	-0.36386	5.92538e-22
ENSG00000075618.13	FSCN1	-0.502837	8.35386e-20
ENSG00000179981.9	TSHZ1	-0.288232	8.35386e-20
ENSG00000155657.19	TTN	0.32886	8.47923e-20
ENSG00000104921.10	FCER2	-0.780999	3.43013e-19
ENSG00000136960.8	ENPP2	0.418443	3.91997e-19
ENSG00000173546.7	CSPG4	-0.300837	4.54142e-19
ENSG00000119042.12	SATB2	0.309614	9.53094e-18
ENSG00000163297.12	ANTXR2	-0.399624	1.4979e-17
ENSG00000233038.1	AC011899.9	0.624733	2.96967e-17
ENSG00000137265.10	IRF4	0.580694	3.92823e-17
ENSG00000075426.7	FOSL2	-0.252922	1.19013e-16
ENSG00000009950.11	MLXIPL	1.11348	1.65597e-16
ENSG00000119547.5	ONECUT2	-0.281439	1.20147e-15
ENSG00000270141.2	TERC	0.347544	2.02796e-14
ENSG00000108001.9	EBF3	-0.363868	3.19903e-14
ENSG00000131127.9	ZNF141	0.441539	3.35903e-14
ENSG00000130396.16	MLLT4	-0.259802	3.95728e-14
ENSG00000120594.12	PLXDC2	0.481691	9.50287e-14
ENSG00000176490.4	DIRAS1	-0.424432	1.17598e-13
ENSG00000000938.8	FGR	0.687149	1.29919e-13
ENSG00000005108.11	THSD7A	-0.346369	1.62965e-13
ENSG00000266976.1	AC079466.1	0.322437	2.37911e-13
ENSG00000133101.5	CCNA1	-0.355142	3.14971e-13
ENSG00000131398.9	KCNC3	0.329402	3.17478e-13
ENSG00000104055.10	TGM5	-0.321264	4.78268e-13
ENSG00000169439.7	SDC2	0.35677	7.13607e-13
ENSG00000150471.11	LPHN3	-0.319799	1.76739e-12
ENSG00000131401.7	NAPSB	0.430912	3.10893e-12
ENSG00000124496.8	TRERF1	-0.245547	3.16537e-12
ENSG00000158473.6	CD1D	0.789425	3.19611e-12
ENSG00000173890.12	GPR160	0.303284	4.09575e-12
ENSG00000122862.4	SRGN	0.25725	1.0169e-11
ENSG00000110400.6	PVRL1	0.301615	1.11903e-11
ENSG00000026025.9	VIM	-0.244915	1.39121e-11
ENSG00000051128.14	HOMER3	-0.453107	2.06755e-11
ENSG00000079819.12	EPB41L2	-0.242319	2.42471e-11
ENSG00000198538.6	ZNF28	0.424389	3.41351e-11
ENSG00000092964.12	DPYSL2	-0.19626	5.69524e-11
ENSG00000014257.11	ACPP	0.354124	1.01999e-10
ENSG00000125726.6	CD70	-0.415866	1.04595e-10
ENSG00000061337.11	LZTS1	-0.403861	6.44816e-10
ENSG00000154265.11	ABCA5	0.608542	1.0128e-09
ENSG00000105409.11	ATP1A3	-0.315758	1.0128e-09
ENSG00000158470.5	B4GALT5	0.204236	1.12357e-09
ENSG00000158104.7	HPD	0.397379	1.21621e-09
ENSG00000065809.9	FAM107B	0.221739	1.29922e-09
ENSG00000113269.9	RNF130	-0.251611	1.29922e-09
ENSG00000180530.5	NRIP1	0.272045	1.40452e-09
ENSG00000144355.10	DLX1	-0.304227	1.55633e-09
ENSG00000135414.5	GDF11	-0.295954	2.57663e-09
ENSG00000134250.13	NOTCH2	0.201999	3.19686e-09
ENSG00000112297.10	AIM1	-0.264074	3.33089e-09
ENSG00000074416.9	MGLL	-0.347541	6.03855e-09
ENSG00000168405.10	CMAHP	-0.39493	7.05207e-09
ENSG00000130592.9	LSP1	0.631079	7.05207e-09
ENSG00000137875.4	BCL2L10	0.57366	7.4522e-09
ENSG00000116991.6	SIPA1L2	-0.348911	1.95504e-08
ENSG00000145555.10	MYO10	-0.221586	2.31194e-08
ENSG00000157500.6	APPL1	0.270897	2.33603e-08
ENSG00000170627.5	GTSF1	0.50346	2.44241e-08
ENSG00000259001.2	RPPH1	0.265499	2.44241e-08
ENSG00000124529.3	HIST1H4B	0.221587	2.44241e-08
ENSG00000170004.12	CHD3	-0.215772	2.47734e-08
ENSG00000213694.3	S1PR3	-0.257325	2.53728e-08
ENSG00000156299.8	TIAM1	-0.375535	2.83866e-08
ENSG00000122641.9	INHBA	-0.257249	3.07101e-08
ENSG00000076864.15	RAP1GAP	-0.407834	3.18395e-08
ENSG00000149516.9	MS4A3	0.195706	3.39839e-08
ENSG00000226806.1	AC011893.3	-0.559811	3.53138e-08
ENSG00000140564.6	FURIN	-0.253301	5.28964e-08
ENSG00000162104.5	ADCY9	-0.199232	5.77343e-08
ENSG00000111371.11	SLC38A1	0.28841	5.77343e-08
ENSG00000183621.11	ZNF438	-0.243233	5.77343e-08
ENSG00000182487.8	NCF1B	0.701236	6.07835e-08
ENSG00000167460.10	TPM4	-0.193448	6.27644e-08
ENSG00000237298.4	TTN-AS1	0.280096	8.36037e-08
ENSG00000149218.4	ENDOD1	0.337393	1.22292e-07
ENSG00000142192.16	APP	-0.243078	1.25782e-07
ENSG00000114107.4	CEP70	-0.275685	1.39398e-07
ENSG00000124766.4	SOX4	-0.188496	1.60371e-07
ENSG00000135916.11	ITM2C	-0.244602	1.694e-07
ENSG00000178718.5	RPP25	0.272057	2.40056e-07
ENSG00000004399.8	PLXND1	-0.222702	2.50925e-07
ENSG00000171724.2	VAT1L	-0.351162	2.90088e-07
ENSG00000163864.10	NMNAT3	-0.298746	3.89654e-07
ENSG00000185920.11	PTCH1	-0.281426	4.36285e-07
ENSG00000143369.10	ECM1	-0.354824	4.40054e-07
ENSG00000101493.6	ZNF516	-0.174222	5.79607e-07
ENSG00000196628.9	TCF4	-0.22442	7.38136e-07
ENSG00000148180.12	GSN	-0.193787	7.45972e-07
ENSG00000163453.7	IGFBP7	-0.232123	7.45972e-07
ENSG00000135549.10	PKIB	-0.303888	7.46849e-07
ENSG00000178104.15	PDE4DIP	0.156199	7.92092e-07
ENSG00000071054.11	MAP4K4	-0.159651	8.71779e-07
ENSG00000170801.5	HTRA3	-0.456182	9.52882e-07
ENSG00000141314.8	RHBDL3	0.746475	1.18706e-06
ENSG00000196890.3	HIST3H2BB	0.324268	1.19361e-06
ENSG00000134871.13	COL4A2	-0.807018	1.22938e-06
ENSG00000177663.9	IL17RA	-0.174841	1.37127e-06
ENSG00000270066.2	SCARNA2	0.23307	1.47876e-06
ENSG00000132405.14	TBC1D14	-0.182222	1.70701e-06
ENSG00000255571.2	LINC00925	0.378298	1.73922e-06
ENSG00000182636.4	NDN	0.443359	1.76731e-06
ENSG00000166402.4	TUB	-0.600091	1.76731e-06
ENSG00000146416.12	AIG1	0.952009	1.93133e-06
ENSG00000204128.5	C2orf72	-0.519525	1.95891e-06
ENSG00000105967.11	TFEC	0.286986	1.98163e-06
ENSG00000260035.1	CTD-2651B20.6	-0.8727	2.06284e-06
ENSG00000197629.5	MPEG1	-0.253416	2.30207e-06
ENSG00000265735.1	RN7SL5P	0.34446	2.5476e-06
ENSG00000168685.10	IL7R	-0.288914	3.28197e-06
ENSG00000256229.3	ZNF486	0.516294	3.87993e-06
ENSG00000107863.12	ARHGAP21	0.303756	3.87993e-06
ENSG00000197061.3	HIST1H4C	0.193246	4.23823e-06
ENSG00000121297.6	TSHZ3	-0.274214	4.65346e-06
ENSG00000186998.11	EMID1	-0.334999	5.04829e-06
ENSG00000143889.11	HNRNPLL	0.219869	5.50764e-06
ENSG00000110934.6	BIN2	-0.181917	6.04363e-06
ENSG00000116701.10	NCF2	-0.285162	6.14784e-06
ENSG00000198816.5	ZNF358	-0.408696	6.51626e-06
ENSG00000112290.8	WASF1	-0.347439	7.2554e-06
ENSG00000135766.8	EGLN1	0.237273	7.42372e-06
ENSG00000101188.4	NTSR1	-0.2912	7.42372e-06
ENSG00000104783.7	KCNN4	-0.236015	8.14916e-06
ENSG00000106484.10	MEST	0.355484	9.6352e-06
ENSG00000159363.13	ATP13A2	0.277463	1.03362e-05
ENSG00000172965.10	MIR4435-1HG	0.268342	1.05074e-05
ENSG00000051108.10	HERPUD1	0.182134	1.05074e-05
ENSG00000010310.4	GIPR	0.324656	1.08786e-05
ENSG00000069493.10	CLEC2D	-0.272102	1.24455e-05
ENSG00000223247.1	RNU2-64P	-0.528691	1.26508e-05
ENSG00000198339.3	HIST1H4I	0.216858	1.27274e-05
ENSG00000100097.7	LGALS1	-0.217994	1.35575e-05
ENSG00000213240.7	NOTCH2NL	0.263622	1.40515e-05
ENSG00000059377.11	TBXAS1	-0.293123	1.4185e-05
ENSG00000212443.1	SNORA53	-0.797156	1.4185e-05
ENSG00000135976.12	ANKRD36	0.186041	1.4866e-05
ENSG00000115165.5	CYTIP	-0.30456	1.61481e-05
ENSG00000167766.14	ZNF83	0.324455	1.64564e-05
ENSG00000146592.12	CREB5	0.304091	1.75113e-05
ENSG00000205213.9	LGR4	0.193348	1.97193e-05
ENSG00000156515.17	HK1	-0.18584	1.98017e-05
ENSG00000189067.8	LITAF	0.308648	1.98017e-05
ENSG00000144677.10	CTDSPL	0.490089	2.05168e-05
ENSG00000100321.10	SYNGR1	-0.235222	2.14832e-05
ENSG00000197506.6	SLC28A3	-0.280936	2.29179e-05
ENSG00000130052.9	STARD8	-0.191573	2.35824e-05
ENSG00000071242.7	RPS6KA2	-0.352493	2.35824e-05
ENSG00000165102.10	HGSNAT	-0.169947	2.35824e-05
ENSG00000165140.5	FBP1	0.328379	2.35824e-05
ENSG00000189212.8	DPY19L2P1	0.728609	2.36557e-05
ENSG00000026508.12	CD44	-0.154633	2.65741e-05
ENSG00000196205.7	EEF1A1P5	-0.246581	2.66461e-05
ENSG00000070081.11	NUCB2	0.155967	2.66461e-05
ENSG00000187699.6	C2orf88	0.475847	2.89219e-05
ENSG00000136280.11	CCM2	-0.204638	3.07684e-05
ENSG00000144711.9	IQSEC1	-0.200765	3.08001e-05
ENSG00000132205.6	EMILIN2	-0.157857	3.08001e-05
ENSG00000206560.6	ANKRD28	-0.196435	3.08001e-05
ENSG00000101347.7	SAMHD1	0.134111	3.11507e-05
ENSG00000225953.2	SATB2-AS1	0.451195	3.32328e-05
ENSG00000062524.11	LTK	0.378318	3.61602e-05
ENSG00000157227.8	MMP14	-0.186412	3.68651e-05
ENSG00000123104.7	ITPR2	0.203005	3.74123e-05
ENSG00000133169.5	BEX1	-0.170635	4.38953e-05
ENSG00000156968.8	MPV17L	0.212941	4.39639e-05
ENSG00000170522.5	ELOVL6	0.654591	4.63819e-05
ENSG00000105639.14	JAK3	-0.362863	4.99189e-05
ENSG00000118495.14	PLAGL1	0.306961	5.00775e-05
ENSG00000145730.16	PAM	0.279632	5.2678e-05
ENSG00000101210.6	EEF1A2	-0.198206	5.2678e-05
ENSG00000226266.2	AC009961.3	0.349172	5.32038e-05
ENSG00000178209.10	PLEC	-0.245567	5.72564e-05
ENSG00000130208.5	APOC1	0.74266	6.12339e-05
ENSG00000069188.12	SDK2	-0.248654	6.19104e-05
ENSG00000125505.12	MBOAT7	-0.185262	6.38993e-05
ENSG00000053254.11	FOXN3	-0.155338	6.43112e-05
ENSG00000124762.9	CDKN1A	-0.202404	6.57182e-05
ENSG00000110031.8	LPXN	-0.193176	6.57182e-05
ENSG00000136810.8	TXN	0.156315	6.65544e-05
ENSG00000184156.11	KCNQ3	-0.361875	7.84372e-05
ENSG00000183386.5	FHL3	-0.3356	7.89192e-05
ENSG00000106789.8	CORO2A	0.539952	7.91654e-05
ENSG00000260139.2	CSPG4P13	-0.451448	7.91654e-05
ENSG00000196155.8	PLEKHG4	0.2156	8.00425e-05
ENSG00000100504.12	PYGL	-0.134899	8.05241e-05
ENSG00000266088.1	RP5-1028K7.2	-0.553066	8.1424e-05
ENSG00000135678.7	CPM	0.195358	8.50857e-05
ENSG00000019144.12	PHLDB1	-0.319019	8.56394e-05
ENSG00000160789.15	LMNA	-0.178889	9.72179e-05
ENSG00000131504.11	DIAPH1	-0.117851	9.94837e-05
ENSG00000110880.6	CORO1C	-0.187175	0.000102094
ENSG00000158517.9	NCF1	0.43576	0.00010351
ENSG00000080845.13	DLGAP4	-0.195192	0.000104616
ENSG00000136010.9	ALDH1L2	0.190237	0.00010533
ENSG00000124813.16	RUNX2	0.144601	0.000106319
ENSG00000100505.9	TRIM9	-0.228368	0.000111158
ENSG00000196415.5	PRTN3	0.196713	0.000111158
ENSG00000165609.8	NUDT5	-0.142297	0.000111158
ENSG00000143891.12	GALM	0.29119	0.000112027
ENSG00000164877.14	MICALL2	-0.294475	0.000112027
ENSG00000133816.9	MICAL2	-0.181235	0.000116158
ENSG00000206634.1	SNORA22	-0.612658	0.000122215
ENSG00000101236.12	RNF24	-0.14316	0.000129652
ENSG00000144619.10	CNTN4	0.847866	0.000129652
ENSG00000081189.9	MEF2C	-0.175011	0.000129968
ENSG00000116871.11	MAP7D1	-0.179525	0.000132688
ENSG00000175274.14	TP53I11	-0.331667	0.000137955
ENSG00000135108.10	FBXO21	0.525623	0.000151738
ENSG00000256663.1	RP11-424C20.2	-0.251814	0.000165927
ENSG00000188987.2	HIST1H4D	0.193117	0.000182148
ENSG00000252947.1	SCARNA1	-0.69353	0.000187001
ENSG00000154358.15	OBSCN	-0.31549	0.000200441
ENSG00000050405.9	LIMA1	-0.194918	0.000212527
ENSG00000137841.7	PLCB2	0.198613	0.00021893
ENSG00000265150.1	RN7SL2	0.21016	0.00021969
ENSG00000123405.9	NFE2	0.31969	0.000235997
ENSG00000149418.6	ST14	0.223197	0.000241474
ENSG00000135363.7	LMO2	-0.137106	0.000257579
ENSG00000128408.7	RIBC2	0.490605	0.000259178
ENSG00000207445.1	SNORD15B	-0.614776	0.000259944
ENSG00000149212.6	SESN3	0.211271	0.000266073
ENSG00000147894.10	C9orf72	0.224996	0.000271202
ENSG00000139266.5	MARCH9	-0.332743	0.000271202
ENSG00000204131.6	NHSL2	-0.453292	0.000272804
ENSG00000246082.2	NUDT16P	0.546843	0.000275758
ENSG00000185518.7	SV2B	-0.419408	0.000275758
ENSG00000063438.12	AHRR	-0.194767	0.000276704
ENSG00000165502.6	RPL36AL	0.193673	0.000277131
ENSG00000200959.1	SNORA74A	-0.378223	0.000278442
ENSG00000165025.10	SYK	-0.119619	0.000285599
ENSG00000215067.5	AC027763.2	0.23376	0.00028868
ENSG00000104964.10	AES	-0.180556	0.00028868
ENSG00000176014.8	TUBB6	-0.158992	0.000306559
ENSG00000184254.12	ALDH1A3	0.546286	0.000374492
ENSG00000080822.12	CLDND1	-0.20472	0.000380728
ENSG00000166743.5	ACSM1	0.252879	0.000394197
ENSG00000100731.11	PCNX	-0.141802	0.000412069
ENSG00000163362.6	C1orf106	0.218051	0.000429418
ENSG00000152760.5	TCTEX1D1	0.603661	0.00045413
ENSG00000154930.10	ACSS1	0.346405	0.00045413
ENSG00000169403.7	PTAFR	-0.406002	0.00045413
ENSG00000197608.7	ZNF841	0.564525	0.000469469
ENSG00000175592.4	FOSL1	-0.223308	0.000483295
ENSG00000133639.3	BTG1	-0.198404	0.000485503
ENSG00000188070.8	C11orf95	-0.235299	0.000544356
ENSG00000126759.8	CFP	0.263493	0.000545008
ENSG00000188636.3	LDOC1L	-0.159318	0.000573472
ENSG00000152527.9	PLEKHH2	-0.366367	0.000573472
ENSG00000213699.4	SLC35F6	-0.177505	0.000573472
ENSG00000111241.2	FGF6	-0.820026	0.000594933
ENSG00000163823.3	CCR1	0.195365	0.000617041
ENSG00000131668.9	BARX1	-0.433543	0.000620276
ENSG00000100433.11	KCNK10	-0.199647	0.000627818
ENSG00000005059.11	CCDC109B	-0.407559	0.000694438
ENSG00000077264.10	PAK3	-0.731065	0.000694965
ENSG00000143418.15	CERS2	-0.135158	0.000696959
ENSG00000269667.1	RP11-542M13.2	-0.24166	0.000700583
ENSG00000177374.8	HIC1	0.617779	0.000718689
ENSG00000182718.12	ANXA2	-0.145454	0.000723871
ENSG00000179361.13	ARID3B	-0.159498	0.000728923
ENSG00000254726.2	MEX3A	-0.198921	0.000731321
ENSG00000136732.10	GYPC	-0.349452	0.000757523
ENSG00000182578.9	CSF1R	-0.201571	0.000782134
ENSG00000196793.9	ZNF239	0.644567	0.000789729
ENSG00000133561.11	GIMAP6	-0.250125	0.00080878
ENSG00000108582.7	CPD	0.139936	0.000833826
ENSG00000197134.7	ZNF257	0.66457	0.000843273
ENSG00000124491.11	F13A1	-0.221115	0.000845537
ENSG00000115255.6	REEP6	-0.186455	0.000845537
ENSG00000152580.8	IGSF10	-0.202652	0.000853001
ENSG00000115844.6	DLX2	-0.613848	0.000869451
ENSG00000158220.9	ESYT3	-0.322335	0.000889824
ENSG00000250479.4	CHCHD10	0.201595	0.000922292
ENSG00000197223.7	C1D	0.21157	0.000931005
ENSG00000160593.13	AMICA1	-0.367797	0.000938316
ENSG00000075420.8	FNDC3B	0.125211	0.000943749
ENSG00000228672.2	PROB1	-0.318376	0.000943749
ENSG00000076641.4	PAG1	-0.147854	0.000954733
ENSG00000044115.16	CTNNA1	-0.139065	0.000971823
ENSG00000151079.6	KCNA6	-0.565116	0.000972115
ENSG00000196814.10	MVB12B	-0.189844	0.000979636
ENSG00000117245.8	KIF17	-0.314562	0.00100846
ENSG00000136999.4	NOV	-0.647028	0.00101283
ENSG00000134330.14	IAH1	0.223507	0.00101283
ENSG00000197746.9	PSAP	0.163741	0.001021
ENSG00000169508.6	GPR183	-0.264871	0.00103752
ENSG00000072786.8	STK10	-0.161584	0.00103752
ENSG00000239388.4	ASB14	0.438592	0.00103752
ENSG00000079215.9	SLC1A3	-0.263883	0.00103752
ENSG00000135424.11	ITGA7	-0.192536	0.0010406
ENSG00000221926.7	TRIM16	-0.171759	0.0010406
ENSG00000088812.13	ATRN	-0.109615	0.0010406
ENSG00000138801.4	PAPSS1	-0.206259	0.00104982
ENSG00000160953.10	MUM1	-0.142025	0.00108889
ENSG00000034063.9	UHRF1	-0.127827	0.00108896
ENSG00000187764.7	SEMA4D	-0.131618	0.00108896
ENSG00000126012.7	KDM5C	-0.143788	0.00113242
ENSG00000135046.9	ANXA1	-0.228982	0.00115904
ENSG00000143669.9	LYST	0.138282	0.00116726
ENSG00000132965.5	ALOX5AP	0.330162	0.00117128
ENSG00000198131.9	ZNF544	0.247656	0.00120755
ENSG00000124942.9	AHNAK	-0.122246	0.00124145
ENSG00000180104.11	EXOC3	-0.139085	0.00124233
ENSG00000262503.1	RP11-530N7.2	0.23121	0.00124348
ENSG00000171757.11	LRRC34	0.232646	0.00126615
ENSG00000014914.15	MTMR11	-0.231268	0.00133024
ENSG00000239002.2	SCARNA10	0.170334	0.00133665
ENSG00000158406.2	HIST1H4H	0.173798	0.00136027
ENSG00000074695.5	LMAN1	0.166927	0.00137492
ENSG00000253140.1	RP11-567J20.3	0.491591	0.00137758
ENSG00000150403.13	TMCO3	-0.166405	0.00139783
ENSG00000132003.5	ZSWIM4	-0.218068	0.00139783
ENSG00000134138.15	MEIS2	0.202175	0.00142451
ENSG00000242071.2	RPL7AP6	-0.365992	0.00144877
ENSG00000167680.11	SEMA6B	0.276316	0.00146816
ENSG00000237440.4	ZNF737	0.358017	0.00149046
ENSG00000163406.6	SLC15A2	0.171259	0.00149434
ENSG00000172232.5	AZU1	0.1483	0.001535
ENSG00000076554.11	TPD52	0.199223	0.00155456
ENSG00000099337.3	KCNK6	-0.212545	0.00157904
ENSG00000179163.11	FUCA1	0.235178	0.00157904
ENSG00000257883.1	RP11-497G19.1	-0.14585	0.00159003
ENSG00000175467.10	SART1	-0.157557	0.00164889
ENSG00000224116.2	INHBA-AS1	-0.24137	0.00168377
ENSG00000136167.9	LCP1	-0.118918	0.00173276
ENSG00000087074.7	PPP1R15A	-0.224416	0.00173276
ENSG00000064393.11	HIPK2	-0.233168	0.00175652
ENSG00000171236.9	LRG1	0.24233	0.00180498
ENSG00000167208.10	SNX20	-0.142709	0.00180498
ENSG00000177508.11	IRX3	-0.130759	0.00186244
ENSG00000048052.17	HDAC9	-0.201788	0.00186244
ENSG00000110079.12	MS4A4A	0.262032	0.00190465
ENSG00000181218.4	HIST3H2A	0.289148	0.00194583
ENSG00000167470.8	MIDN	-0.132678	0.00194721
ENSG00000171853.11	TRAPPC12	-0.137815	0.00195531
ENSG00000025039.10	RRAGD	0.378605	0.0019829
ENSG00000127311.5	HELB	0.155535	0.00200511
ENSG00000109906.9	ZBTB16	0.286155	0.00203047
ENSG00000169919.12	GUSB	0.131305	0.00205062
ENSG00000125810.9	CD93	-0.460846	0.00205611
ENSG00000120889.8	TNFRSF10B	-0.127226	0.00205611
ENSG00000141510.11	TP53	-0.116161	0.00208697
ENSG00000196912.8	ANKRD36B	0.167264	0.00209283
ENSG00000163110.10	PDLIM5	0.236373	0.00216441
ENSG00000154822.11	PLCL2	0.664604	0.00217586
ENSG00000212402.1	SNORA74B	-0.575887	0.00219374
ENSG00000263934.2	SNORD3A	-0.453849	0.00220073
ENSG00000138640.10	FAM13A	0.356821	0.00221034
ENSG00000258486.2	RN7SL1	0.302383	0.00221275
ENSG00000138028.10	CGREF1	0.15346	0.00221298
ENSG00000225614.2	ZNF469	-0.168422	0.0022706
ENSG00000205268.6	PDE7A	0.141947	0.0022706
ENSG00000178464.6	CTD-2192J16.15	-0.316084	0.00230817
ENSG00000110328.5	GALNT18	0.437863	0.00231245
ENSG00000180357.5	ZNF609	-0.132946	0.00231245
ENSG00000244405.3	ETV5	-0.171938	0.00231245
ENSG00000186187.7	ZNRF1	-0.157682	0.0023177
ENSG00000197635.5	DPP4	0.530573	0.00238108
ENSG00000120798.12	NR2C1	0.176591	0.0024606
ENSG00000221923.4	ZNF880	0.618772	0.00256003
ENSG00000161929.10	SCIMP	0.36661	0.00268862
ENSG00000182319.5	SGK223	-0.153708	0.0027001
ENSG00000166428.8	PLD4	0.161629	0.00274117
ENSG00000165879.7	FRAT1	-0.203492	0.0027832
ENSG00000213443.2	RP11-75L1.2	-0.294229	0.00278739
ENSG00000186810.7	CXCR3	-0.343549	0.00287524
ENSG00000157303.6	SUSD3	0.201475	0.00289308
ENSG00000100628.7	ASB2	-0.48782	0.00292515
ENSG00000203813.4	HIST1H3H	0.180849	0.00292531
ENSG00000171148.9	TADA3	-0.130167	0.0029282
ENSG00000130005.7	GAMT	-0.141547	0.0029282
ENSG00000151465.9	CDC123	-0.131293	0.00293217
ENSG00000106829.14	TLE4	-0.124077	0.00296175
ENSG00000167088.6	SNRPD1	0.125694	0.00299789
ENSG00000156030.8	ELMSAN1	-0.12142	0.00300784
ENSG00000131507.9	NDFIP1	0.156352	0.00301518
ENSG00000030419.12	IKZF2	-0.332832	0.00301635
ENSG00000157445.10	CACNA2D3	0.327853	0.00302398
ENSG00000118308.10	LRMP	-0.147295	0.00308045
ENSG00000157404.11	KIT	0.301975	0.00309078
ENSG00000167601.7	AXL	-0.425437	0.00309078
ENSG00000166900.10	STX3	-0.195489	0.00309145
ENSG00000185090.10	MANEAL	0.31565	0.00311224
ENSG00000256018.1	HIST1H3G	0.182678	0.00311224
ENSG00000104205.8	SGK3	0.222767	0.00311224
ENSG00000106948.12	AKNA	-0.13584	0.00319281
ENSG00000183558.5	HIST2H2AA3	-0.457907	0.00319281
ENSG00000119866.16	BCL11A	-0.135495	0.00319281
ENSG00000203326.5	ZNF525	0.492829	0.00319281
ENSG00000213967.6	ZNF726	0.319639	0.00319281
ENSG00000084731.9	KIF3C	-0.258141	0.00319281
ENSG00000118985.10	ELL2	0.255383	0.00321303
ENSG00000182162.5	P2RY8	-0.129524	0.00321303
ENSG00000245532.4	NEAT1	0.175515	0.00322371
ENSG00000229645.4	LINC00341	-0.153365	0.00324387
ENSG00000119729.6	RHOQ	0.237441	0.00327562
ENSG00000026559.9	KCNG1	-0.31949	0.00333022
ENSG00000110987.4	BCL7A	-0.17542	0.0034044
ENSG00000264112.1	RP11-159D12.2	0.182595	0.0034733
ENSG00000111885.5	MAN1A1	0.260632	0.00350315
ENSG00000128228.4	SDF2L1	0.194765	0.00351714
ENSG00000136720.6	HS6ST1	-0.183501	0.00351714
ENSG00000166104.10	hsa-mir-7162	0.586313	0.00364382
ENSG00000265764.1	AL662890.3	-0.576808	0.00365089
ENSG00000198848.8	CES1	0.154611	0.0036969
ENSG00000006534.11	ALDH3B1	-0.184419	0.00371149
ENSG00000153898.8	MCOLN2	0.286591	0.00379168
ENSG00000172828.8	CES3	0.362097	0.00386717
ENSG00000147465.7	STAR	0.194608	0.00386717
ENSG00000136295.10	TTYH3	-0.143773	0.00387724
ENSG00000176438.8	SYNE3	-0.137286	0.00390142
ENSG00000166927.8	MS4A7	-0.183642	0.00390142
ENSG00000095209.7	TMEM38B	0.218148	0.00390142
ENSG00000197238.3	HIST1H4J	0.239436	0.00394844
ENSG00000160284.10	SPATC1L	-0.263484	0.00394844
ENSG00000160360.7	GPSM1	-0.19264	0.00394844
ENSG00000185262.7	UBALD2	-0.159218	0.00394972
ENSG00000013364.14	MVP	-0.169128	0.0039705
ENSG00000150593.11	PDCD4	0.126644	0.00400152
ENSG00000088179.4	PTPN4	0.304263	0.00402945
ENSG00000164070.7	HSPA4L	0.235305	0.00402945
ENSG00000138623.5	SEMA7A	-0.230702	0.00407498
ENSG00000172716.12	SLFN11	0.226265	0.00407498
ENSG00000197275.8	RAD54B	0.247013	0.00411874
ENSG00000198521.7	ZNF43	0.194557	0.00411874
ENSG00000242258.1	LINC00996	0.176134	0.00415155
ENSG00000126264.5	HCST	-0.187557	0.00415155
ENSG00000115935.12	WIPF1	-0.11595	0.00415515
ENSG00000040633.8	PHF23	-0.168411	0.00424016
ENSG00000138829.6	FBN2	0.69571	0.00439298
ENSG00000178852.11	EFCAB13	0.239233	0.00442927
ENSG00000148841.11	ITPRIP	-0.17752	0.00443905
ENSG00000203872.6	C6orf163	0.388514	0.00443905
ENSG00000107957.12	SH3PXD2A	-0.465884	0.00446976
ENSG00000135378.3	PRRG4	0.19784	0.00459004
ENSG00000173706.8	HEG1	-0.23283	0.00467401
ENSG00000174501.10	ANKRD36C	0.149168	0.00467401
ENSG00000164543.5	STK17A	0.1727	0.00473484
ENSG00000114439.14	BBX	-0.145244	0.00482033
ENSG00000100345.16	MYH9	-0.149818	0.00496901
ENSG00000160299.12	PCNT	-0.127325	0.00496901
ENSG00000165272.10	AQP3	-0.273744	0.00512206
ENSG00000093072.11	CECR1	-0.272331	0.00512206
ENSG00000146263.7	MMS22L	0.163096	0.00512206
ENSG00000105223.14	PLD3	0.18101	0.00524276
ENSG00000184922.9	FMNL1	-0.136604	0.00528219
ENSG00000167566.12	NCKAP5L	-0.183272	0.00545011
ENSG00000100285.9	NEFH	-0.192496	0.00545011
ENSG00000159200.13	RCAN1	-0.151236	0.00549232
ENSG00000134686.12	PHC2	-0.131056	0.00580534
ENSG00000196781.9	TLE1	-0.17203	0.00580534
ENSG00000067798.9	NAV3	-0.137083	0.00584102
ENSG00000183020.9	AP2A2	-0.131703	0.00590134
ENSG00000183307.3	CECR6	-0.137366	0.00596344
ENSG00000217896.2	ZNF839P1	0.692212	0.00603673
ENSG00000166002.2	SMCO4	0.315725	0.00617387
ENSG00000177700.5	POLR2L	0.189051	0.00617387
ENSG00000262943.3	ALOX12P2	0.160709	0.00617387
ENSG00000124610.3	HIST1H1A	-0.274731	0.00617387
ENSG00000136807.7	CDK9	-0.132445	0.00635999
ENSG00000186517.9	ARHGAP30	-0.128198	0.00649227
ENSG00000172123.8	SLFN12	0.533214	0.00652382
ENSG00000116985.6	BMP8B	0.182692	0.00664361
ENSG00000196460.8	RFX8	-0.174135	0.00664361
ENSG00000141298.13	SSH2	-0.102058	0.00668632
ENSG00000181192.7	DHTKD1	-0.111226	0.00672439
ENSG00000242732.3	RGAG4	-0.303982	0.00676347
ENSG00000119950.16	MXI1	-0.138689	0.00679743
ENSG00000117525.9	F3	0.14614	0.00679743
ENSG00000128322.6	IGLL1	0.2271	0.0068296
ENSG00000119900.7	OGFRL1	0.214899	0.00693508
ENSG00000141480.13	ARRB2	-0.150773	0.00728111
ENSG00000130340.10	SNX9	0.41337	0.00728111
ENSG00000167291.11	TBC1D16	-0.138802	0.00730695
ENSG00000155254.8	MARVELD1	-0.147763	0.00730695
ENSG00000086300.11	SNX10	0.366377	0.00747646
ENSG00000160336.10	ZNF761	0.178305	0.00747646
ENSG00000170464.5	DNAJC18	-0.304995	0.00756978
ENSG00000046651.10	OFD1	0.123173	0.00769907
ENSG00000106991.9	ENG	-0.136956	0.00778504
ENSG00000184574.5	LPAR5	-0.43842	0.00780239
ENSG00000117676.9	RPS6KA1	-0.112785	0.00780239
ENSG00000188549.8	C15orf52	-0.379205	0.00787363
ENSG00000071051.9	NCK2	-0.135597	0.00806376
ENSG00000226259.6	GTF2H2B	0.232828	0.00806376
ENSG00000188001.5	TPRG1	-0.537135	0.00839401
ENSG00000184009.5	ACTG1	-0.124919	0.0084905
ENSG00000110711.5	AIP	-0.152588	0.00852586
ENSG00000170439.5	METTL7B	-0.256508	0.00854604
ENSG00000229463.2	LYST-AS1	0.294347	0.00864332
ENSG00000204371.7	EHMT2	-0.125694	0.00870919
ENSG00000077232.12	DNAJC10	0.177615	0.00871217
ENSG00000179630.6	LACC1	0.256769	0.00876001
ENSG00000132694.14	ARHGEF11	0.194532	0.00876125
ENSG00000035862.8	TIMP2	-0.242462	0.00880772
ENSG00000166025.13	AMOTL1	-0.124112	0.00880772
ENSG00000270574.1	RP11-171I2.2	0.50903	0.00888808
ENSG00000148680.11	HTR7	-0.244075	0.00904186
ENSG00000177853.10	ZNF518A	0.161714	0.00915378
ENSG00000148339.8	SLC25A25	-0.200585	0.00915378
ENSG00000142765.13	SYTL1	0.19262	0.00919599
ENSG00000153094.17	BCL2L11	0.145915	0.00923356
ENSG00000102226.5	USP11	-0.153237	0.00930292
ENSG00000135111.10	TBX3	0.25508	0.0093302
ENSG00000213553.3	RPLP0P6	-0.278267	0.0093302
ENSG00000183087.10	GAS6	0.132769	0.00936671
ENSG00000141753.5	IGFBP4	-0.150802	0.00941487
ENSG00000198216.6	CACNA1E	0.431389	0.00943321
ENSG00000231607.4	DLEU2	0.165919	0.00958643
ENSG00000109685.13	WHSC1	-0.0898217	0.0096609
ENSG00000227097.4	RP11-742N3.1	-0.309531	0.0096609
ENSG00000182511.7	FES	-0.131183	0.00968066
ENSG00000124370.6	MCEE	0.276774	0.00977146
ENSG00000125144.9	MT1G	0.168798	0.0097882
ENSG00000127838.9	PNKD	-0.156908	0.00984625
ENSG00000117020.12	AKT3	-0.18014	0.00986321
ENSG00000058668.10	ATP2B4	0.108319	0.00986532
ENSG00000162924.9	REL	0.176574	0.00992413
ENSG00000006740.12	ARHGAP44	0.117188	0.00993422
ENSG00000087253.7	LPCAT2	0.215891	0.00997548
ENSG00000228065.6	RP11-222A11.1	0.31124	0.0100321
ENSG00000214013.5	GANC	0.136853	0.0100321
ENSG00000257093.2	KIAA1147	-0.120217	0.0101367
ENSG00000185480.7	PARPBP	0.170014	0.0101425
ENSG00000116095.6	PLEKHA3	0.161778	0.0102501
ENSG00000188811.8	NHLRC3	0.233132	0.0102501
ENSG00000196526.6	AFAP1	-0.306103	0.0103198
ENSG00000227063.4	RPL41P1	-0.182604	0.0104596
ENSG00000183486.8	MX2	-0.230629	0.0105736
ENSG00000143815.10	LBR	0.141012	0.0108882
ENSG00000144724.14	PTPRG	0.204093	0.0109851
ENSG00000101298.9	SNPH	-0.604471	0.0109851
ENSG00000169258.6	GPRIN1	-0.231992	0.0110077
ENSG00000167419.6	LPO	0.385534	0.0110408
ENSG00000076662.5	ICAM3	0.22865	0.0110408
ENSG00000221968.4	FADS3	-0.247968	0.0110408
ENSG00000178695.4	KCTD12	0.269198	0.0110408
ENSG00000130164.7	LDLR	-0.104972	0.0110986
ENSG00000221890.2	NPTXR	-0.369972	0.0111264
ENSG00000168792.4	ABHD15	-0.103967	0.0111856
ENSG00000129993.10	CBFA2T3	-0.122366	0.0112308
ENSG00000197535.10	MYO5A	-0.124633	0.011253
ENSG00000127663.10	KDM4B	-0.127214	0.0112669
ENSG00000124693.2	HIST1H3B	0.144866	0.011479
ENSG00000043143.16	PHF15	-0.106255	0.0114822
ENSG00000167378.4	IRGQ	-0.1191	0.0116156
ENSG00000023909.5	GCLM	0.167704	0.0117252
ENSG00000151366.8	NDUFC2	0.141548	0.0117526
ENSG00000255081.1	RP11-263C24.1	0.600262	0.0119496
ENSG00000196268.7	ZNF493	0.239013	0.0119605
ENSG00000105048.12	TNNT1	-0.393039	0.0119605
ENSG00000197837.3	HIST4H4	0.162286	0.0120726
ENSG00000131462.3	TUBG1	-0.140797	0.0123015
ENSG00000049246.10	PER3	-0.256863	0.0123179
ENSG00000253926.1	RP11-26E5.1	0.360362	0.0123179
ENSG00000165178.8	NCF1C	0.638455	0.0123179
ENSG00000184640.13	SEPT9	-0.132868	0.0123814
ENSG00000118418.10	HMGN3	0.154677	0.0123814
ENSG00000166949.11	SMAD3	-0.116551	0.0124049
ENSG00000101940.13	WDR13	-0.145785	0.0124049
ENSG00000151247.8	EIF4E	0.11919	0.0124049
ENSG00000116786.7	PLEKHM2	-0.141716	0.0124049
ENSG00000162734.8	PEA15	-0.130143	0.0124468
ENSG00000197081.8	IGF2R	-0.0968841	0.0127534
ENSG00000204843.8	DCTN1	-0.126459	0.0127643
ENSG00000171617.9	ENC1	-0.297231	0.0128198
ENSG00000127616.13	SMARCA4	-0.132295	0.0132589
ENSG00000111666.6	CHPT1	0.371632	0.0132589
ENSG00000146112.7	PPP1R18	-0.132232	0.0132589
ENSG00000131018.18	SYNE1	-0.235921	0.0134065
ENSG00000221962.3	TMEM14E	0.201644	0.0134145
ENSG00000263264.1	CTB-133G6.1	0.16934	0.0134832
ENSG00000176884.10	GRIN1	0.455363	0.0134832
ENSG00000183734.4	ASCL2	0.365397	0.0134832
ENSG00000133863.2	TEX15	0.179981	0.0137166
ENSG00000140835.8	CHST4	-0.549232	0.0137643
ENSG00000201098.1	RNY1	-0.653202	0.0138407
ENSG00000006712.10	PAF1	-0.12693	0.0139413
ENSG00000142961.10	MOB3C	-0.190648	0.0141655
ENSG00000139641.8	ESYT1	-0.108949	0.014342
ENSG00000132967.9	HMGB1P5	-0.287094	0.014437
ENSG00000137970.7	RP11-122C9.1	-0.245658	0.014492
ENSG00000196739.10	COL27A1	-0.138251	0.0146914
ENSG00000185834.9	RPL12P4	-0.529951	0.0149717
ENSG00000113971.14	NPHP3	0.212529	0.0149717
ENSG00000162337.7	LRP5	-0.135736	0.0150424
ENSG00000205246.4	RPSAP58	-0.208091	0.0150424
ENSG00000171206.9	TRIM8	-0.142073	0.0151002
ENSG00000101846.6	STS	-0.16851	0.0151317
ENSG00000081320.6	STK17B	-0.180324	0.0151317
ENSG00000123965.12	PMS2P5	0.230692	0.0151402
ENSG00000134824.9	FADS2	-0.11048	0.0155455
ENSG00000251022.2	THAP9-AS1	0.184355	0.0156169
ENSG00000104093.9	DMXL2	0.121689	0.0156169
ENSG00000079277.15	MKNK1	-0.109386	0.0157103
ENSG00000232573.1	RPL3P4	-0.333702	0.0157489
ENSG00000240342.2	RPS2P5	-0.188631	0.0157489
ENSG00000100304.12	TTLL12	-0.118563	0.0158128
ENSG00000122068.8	FYTTD1	0.120711	0.0158143
ENSG00000196636.7	ACN9	0.195459	0.0161336
ENSG00000202538.1	RNU4-2	-0.452488	0.016219
ENSG00000143149.8	ALDH9A1	-0.120088	0.0164191
ENSG00000126461.10	SCAF1	-0.115336	0.0164191
ENSG00000135605.8	TEC	-0.125336	0.0164915
ENSG00000159842.10	ABR	-0.118648	0.0165828
ENSG00000111961.12	SASH1	-0.11047	0.0166544
ENSG00000124422.7	USP22	-0.104919	0.0166903
ENSG00000185614.4	FAM212A	-0.259236	0.0169848
ENSG00000138172.6	CALHM2	-0.190216	0.0171764
ENSG00000150347.10	ARID5B	-0.48063	0.0172104
ENSG00000255103.1	KIAA0754	-0.137393	0.0172828
ENSG00000090674.11	MCOLN1	-0.19463	0.0173338
ENSG00000104522.11	TSTA3	-0.118704	0.0176933
ENSG00000144647.5	POMGNT2	0.261682	0.0178401
ENSG00000186350.8	RXRA	-0.107546	0.0178722
ENSG00000110077.10	MS4A6A	0.122044	0.0178836
ENSG00000160712.8	IL6R	0.0960826	0.0179342
ENSG00000116990.9	MYCL	0.398346	0.0179342
ENSG00000179820.11	MYADM	0.0993759	0.0180038
ENSG00000140931.15	CMTM3	-0.117229	0.0184614
ENSG00000151233.6	GXYLT1	0.169591	0.0184919
ENSG00000005073.5	HOXA11	0.473263	0.0184919
ENSG00000101096.15	NFATC2	0.146095	0.0184919
ENSG00000150756.9	FAM173B	0.165014	0.0186661
ENSG00000199568.1	RNU5A-1	-0.754218	0.0187036
ENSG00000112977.11	DAP	-0.102719	0.0187419
ENSG00000136205.12	TNS3	-0.0972594	0.0188048
ENSG00000123908.7	AGO2	-0.100095	0.0188865
ENSG00000164604.8	GPR85	-0.213699	0.0191603
ENSG00000196924.10	FLNA	-0.130627	0.0192118
ENSG00000126705.9	AHDC1	-0.139828	0.019287
ENSG00000230733.2	AC092171.4	-0.203421	0.019287
ENSG00000136802.7	LRRC8A	-0.147764	0.019287
ENSG00000182158.10	CREB3L2	0.106378	0.0194216
ENSG00000136630.11	HLX	-0.165464	0.0194216
ENSG00000140943.12	MBTPS1	-0.0991897	0.0194394
ENSG00000106546.8	AHR	-0.143933	0.0197639
ENSG00000100092.16	SH3BP1	-0.144584	0.0199784
ENSG00000044574.7	HSPA5	0.086692	0.0203072
ENSG00000184281.10	TSSC4	-0.156087	0.0203072
ENSG00000156587.11	UBE2L6	-0.323626	0.0203356
ENSG00000117054.9	ACADM	0.142764	0.0205538
ENSG00000175265.13	GOLGA8A	0.212108	0.0206139
ENSG00000232486.1	RP11-18B3.2	0.511094	0.0206216
ENSG00000112799.4	LY86	-0.169529	0.0206419
ENSG00000232637.3	WI2-3658N16.1	-0.289336	0.0208262
ENSG00000099364.12	FBXL19	-0.120548	0.0209583
ENSG00000108604.11	SMARCD2	-0.116512	0.0209721
ENSG00000171812.6	COL8A2	0.448821	0.0215018
ENSG00000035681.3	NSMAF	-0.0932248	0.0217012
ENSG00000106809.6	OGN	0.266549	0.0218891
ENSG00000052723.7	SIKE1	0.140456	0.0227781
ENSG00000222041.6	LINC00152	0.274702	0.022819
ENSG00000169093.10	ASMTL	-0.145311	0.0228317
ENSG00000241973.6	PI4KA	-0.117837	0.0229819
ENSG00000111737.7	RAB35	-0.125599	0.0229819
ENSG00000113494.12	PRLR	-0.339014	0.0235276
ENSG00000105321.8	CCDC9	-0.147411	0.0237023
ENSG00000110697.8	PITPNM1	-0.139424	0.0237023
ENSG00000228903.2	RASA4CP	0.45421	0.0237116
ENSG00000163563.7	MNDA	0.253769	0.0238814
ENSG00000151553.10	FAM160B1	0.150586	0.0238814
ENSG00000257654.1	RP11-497G19.2	-0.179246	0.0239862
ENSG00000119969.10	HELLS	0.133695	0.0239862
ENSG00000097007.13	ABL1	-0.10618	0.0239862
ENSG00000139613.7	SMARCC2	-0.118265	0.0239862
ENSG00000168653.6	NDUFS5	0.147692	0.0239862
ENSG00000066827.11	ZFAT	-0.121221	0.023991
ENSG00000231201.1	AF127577.11	0.541034	0.0245185
ENSG00000169896.12	ITGAM	0.439548	0.0246191
ENSG00000014216.11	CAPN1	-0.107295	0.0246191
ENSG00000001167.10	NFYA	-0.103097	0.0246191
ENSG00000110881.7	ASIC1	-0.228907	0.0246191
ENSG00000197914.2	HIST1H4K	0.222874	0.0249295
ENSG00000235174.1	RPL39P3	-0.328017	0.0249348
ENSG00000164308.12	ERAP2	0.233602	0.0249559
ENSG00000149577.11	SIDT2	-0.148517	0.0249559
ENSG00000224861.1	YBX1P1	-0.319919	0.0249559
ENSG00000167074.10	TEF	-0.218634	0.0251621
ENSG00000233476.2	EEF1A1P6	-0.265989	0.0251811
ENSG00000010610.5	CD4	-0.107207	0.0252326
ENSG00000251562.3	MALAT1	0.104937	0.025318
ENSG00000061273.13	HDAC7	-0.142651	0.0253899
ENSG00000125827.4	TMX4	0.140524	0.0254104
ENSG00000115677.12	HDLBP	-0.107805	0.0254104
ENSG00000182185.14	RAD51B	0.235414	0.0254104
ENSG00000188997.3	KCTD21	-0.273613	0.025478
ENSG00000132718.7	SYT11	-0.268739	0.0254922
ENSG00000257195.1	HNRNPA1P50	0.535554	0.0255476
ENSG00000060558.3	GNA15	-0.132929	0.0257582
ENSG00000087460.19	GNAS	0.10193	0.0257582
ENSG00000106028.6	SSBP1	0.114802	0.0258398
ENSG00000046653.10	GPM6B	0.245755	0.0258821
ENSG00000142303.9	ADAMTS10	0.421761	0.0258821
ENSG00000188522.10	FAM83G	-0.156313	0.0260527
ENSG00000233913.6	CTC-575D19.1	-0.402957	0.0263007
ENSG00000174718.7	KIAA1551	-0.129632	0.0265704
ENSG00000163156.7	SCNM1	-0.13391	0.0266045
ENSG00000186472.15	PCLO	0.156875	0.0269467
ENSG00000092820.13	EZR	-0.10584	0.0273884
ENSG00000167600.9	CYP2S1	-0.293029	0.0275691
ENSG00000133246.7	PRAM1	0.470685	0.0276332
ENSG00000186073.7	C15orf41	0.162983	0.0277276
ENSG00000121775.13	TMEM39B	-0.147109	0.0278802
ENSG00000153914.11	SREK1	0.148037	0.0278802
ENSG00000090266.8	NDUFB2	0.134391	0.0279146
ENSG00000175215.5	CTDSP2	-0.0989597	0.0281645
ENSG00000177426.16	TGIF1	-0.142019	0.0281645
ENSG00000133313.10	CNDP2	-0.112432	0.0284334
ENSG00000104728.11	ARHGEF10	-0.16285	0.0284406
ENSG00000010017.9	RANBP9	-0.113689	0.0285411
ENSG00000147010.13	SH3KBP1	-0.111854	0.0287253
ENSG00000163249.5	CCNYL1	0.13767	0.0289643
ENSG00000108107.8	RPL28	0.113659	0.0289904
ENSG00000124225.11	PMEPA1	-0.311366	0.0289904
ENSG00000125651.9	GTF2F1	-0.138158	0.0292299
ENSG00000101849.11	TBL1X	-0.109657	0.0292639
ENSG00000075826.12	SEC31B	0.215866	0.0294111
ENSG00000244754.4	N4BP2L2	0.11236	0.0294111
ENSG00000133961.15	NUMB	-0.0947787	0.0296904
ENSG00000235863.2	B3GALT4	-0.285874	0.0296904
ENSG00000144655.10	CSRNP1	-0.254176	0.0298002
ENSG00000070614.10	NDST1	0.226195	0.0301779
ENSG00000032389.8	TSSC1	-0.130295	0.0303794
ENSG00000130720.8	FIBCD1	-0.26766	0.030499
ENSG00000237649.3	KIFC1	-0.118396	0.0306244
ENSG00000182871.10	COL18A1	0.198081	0.0306244
ENSG00000196656.6	AC004057.1	-0.379103	0.0306955
ENSG00000250312.2	ZNF718	0.172708	0.0308384
ENSG00000107819.9	SFXN3	-0.0989124	0.0308384
ENSG00000152229.14	PSTPIP2	-0.125556	0.0308384
ENSG00000223336.1	RNU2-6P	-0.511222	0.0311673
ENSG00000068831.14	RASGRP2	0.118192	0.0311745
ENSG00000134242.11	PTPN22	0.197474	0.0312473
ENSG00000158987.15	RAPGEF6	0.188329	0.0313099
ENSG00000169855.15	ROBO1	-0.331354	0.0319945
ENSG00000196810.4	CTBP1-AS2	-0.144434	0.0319945
ENSG00000169410.5	PTPN9	-0.11688	0.0319945
ENSG00000115392.7	FANCL	0.175309	0.0320698
ENSG00000261069.2	SNORD116-20	-0.112795	0.0323005
ENSG00000179886.4	TIGD5	-0.147392	0.0323005
ENSG00000197375.8	SLC22A5	0.254372	0.0323967
ENSG00000184634.11	MED12	-0.112765	0.0324234
ENSG00000127824.9	TUBA4A	0.156122	0.0324265
ENSG00000106605.6	BLVRA	0.484369	0.0326583
ENSG00000170027.5	YWHAG	-0.0935336	0.0329126
ENSG00000233369.3	RP11-396K3.1	0.440341	0.0330501
ENSG00000183527.7	PSMG1	0.121715	0.0331353
ENSG00000108064.6	TFAM	0.142344	0.0331353
ENSG00000110090.8	CPT1A	-0.0940901	0.0331814
ENSG00000271997.1	RP11-97O12.6	0.284684	0.0332523
ENSG00000151690.10	MFSD6	-0.212979	0.033352
ENSG00000249471.3	ZNF324B	-0.150828	0.033352
ENSG00000175155.4	YPEL2	0.247843	0.0339656
ENSG00000175792.7	RUVBL1	-0.101683	0.0340565
ENSG00000170085.13	SIMC1	-0.117451	0.034109
ENSG00000131378.9	RFTN1	-0.11775	0.0343455
ENSG00000165030.3	NFIL3	-0.160966	0.034367
ENSG00000252481.1	SCARNA13	0.308222	0.034367
ENSG00000146535.9	GNA12	-0.107128	0.034743
ENSG00000123739.6	PLA2G12A	0.217728	0.0350026
ENSG00000105993.10	DNAJB6	-0.0948834	0.0359906
ENSG00000160991.11	ORAI2	-0.120989	0.0360062
ENSG00000136936.6	XPA	0.174966	0.0360062
ENSG00000119242.4	CCDC92	-0.267354	0.0360062
ENSG00000126803.8	HSPA2	-0.217344	0.0362352
ENSG00000129514.4	FOXA1	-0.383746	0.0364536
ENSG00000135365.11	PHF21A	-0.119272	0.0364945
ENSG00000162783.8	IER5	-0.151235	0.036986
ENSG00000125733.13	TRIP10	-0.153325	0.0371069
ENSG00000151657.7	KIN	0.146271	0.0373945
ENSG00000255833.1	TIFAB	-0.103309	0.0374059
ENSG00000116704.6	SLC35D1	0.147102	0.0374059
ENSG00000128881.12	TTBK2	-0.105694	0.037458
ENSG00000135926.8	TMBIM1	-0.144389	0.0378489
ENSG00000142733.10	MAP3K6	-0.140416	0.0384648
ENSG00000254087.3	LYN	0.0971751	0.0384672
ENSG00000237693.4	IRGM	0.534633	0.0385483
ENSG00000100105.13	PATZ1	-0.096549	0.0385483
ENSG00000135482.2	ZC3H10	-0.186588	0.038887
ENSG00000196576.10	PLXNB2	-0.122694	0.0389232
ENSG00000148290.5	SURF1	0.135177	0.0390802
ENSG00000175582.15	RAB6A	0.118534	0.0391103
ENSG00000019485.8	PRDM11	-0.314031	0.0391103
ENSG00000165071.10	TMEM71	-0.191276	0.0391103
ENSG00000109861.11	CTSC	0.095512	0.0393309
ENSG00000001617.7	SEMA3F	-0.467078	0.0394052
ENSG00000143437.16	ARNT	-0.106234	0.039547
ENSG00000200087.1	SNORA73B	-0.384795	0.0400639
ENSG00000088247.11	KHSRP	-0.100058	0.0400639
ENSG00000201998.1	SNORA23	-0.455091	0.0400639
ENSG00000130522.4	JUND	-0.118058	0.040123
ENSG00000145945.5	FAM50B	-0.20293	0.040123
ENSG00000143799.8	PARP1	-0.0953102	0.0402407
ENSG00000066084.8	DIP2B	-0.0862109	0.0402407
ENSG00000226137.3	BAIAP2-AS1	-0.153111	0.0403221
ENSG00000180354.11	C7orf41	-0.210797	0.0403221
ENSG00000145506.9	NKD2	-0.123925	0.040538
ENSG00000172725.9	CORO1B	-0.129477	0.040538
ENSG00000105323.12	HNRNPUL1	-0.0910142	0.0405713
ENSG00000151287.12	TEX30	0.159367	0.0406066
ENSG00000155158.16	TTC39B	0.279597	0.0412565
ENSG00000100994.7	PYGB	-0.101955	0.0412626
ENSG00000204673.6	AKT1S1	-0.118765	0.0416815
ENSG00000205293.3	RP11-1112C15.1	0.376577	0.0418203
ENSG00000154217.10	PITPNC1	-0.125228	0.0418674
ENSG00000103549.17	RNF40	-0.100576	0.0419685
ENSG00000172209.4	GPR22	0.361253	0.0422118
ENSG00000163386.16	NBPF10	0.156664	0.0424877
ENSG00000065000.11	AP3D1	-0.11599	0.0424877
ENSG00000265206.2	MIR142	0.194442	0.0424877
ENSG00000205903.2	ZNF316	-0.157086	0.0424877
ENSG00000055163.14	CYFIP2	-0.185994	0.0424877
ENSG00000115956.9	PLEK	0.0947008	0.042547
ENSG00000168280.12	KIF5C	-0.541435	0.0428398
ENSG00000105443.9	CYTH2	-0.126228	0.0435506
ENSG00000196843.11	ARID5A	-0.139123	0.0437342
ENSG00000130158.9	DOCK6	-0.137144	0.0439637
ENSG00000223001.1	RNU2-61P	-0.5934	0.0440006
ENSG00000120254.11	MTHFD1L	-0.0911035	0.0440446
ENSG00000167323.5	STIM1	-0.102518	0.044132
ENSG00000005243.5	COPZ2	0.391028	0.044132
ENSG00000147592.4	LACTB2	0.243177	0.0441669
ENSG00000118707.5	TGIF2	-0.109426	0.0443606
ENSG00000182481.4	KPNA2	-0.0905958	0.0445727
ENSG00000110330.4	BIRC2	0.153444	0.0448288
ENSG00000147044.16	CASK	0.325866	0.0449146
ENSG00000107614.17	TRDMT1	0.185853	0.0450522
ENSG00000145348.12	TBCK	0.121197	0.0450618
ENSG00000157350.8	ST3GAL2	-0.153643	0.0450835
ENSG00000013810.14	TACC3	-0.107731	0.0451844
ENSG00000176533.8	GNG7	-0.178904	0.045218
ENSG00000135749.14	PCNXL2	-0.244679	0.0456572
ENSG00000202198.1	RN7SK	0.142952	0.0456908
ENSG00000060069.12	CTDP1	-0.105912	0.0456908
ENSG00000145414.4	NAF1	0.138699	0.0456908
ENSG00000252010.1	SCARNA5	0.147576	0.0456908
ENSG00000105173.9	CCNE1	-0.117918	0.0456908
ENSG00000212916.3	MAP10	-0.148161	0.0459619
ENSG00000185386.10	MAPK11	0.24254	0.0460014
ENSG00000100241.16	SBF1	-0.106237	0.0461169
ENSG00000133275.11	CSNK1G2	-0.105888	0.0463269
ENSG00000110395.4	CBL	-0.08728	0.0464748
ENSG00000005339.8	CREBBP	-0.0984491	0.0464748
ENSG00000215114.3	UBXN2B	0.115214	0.0465972
ENSG00000168672.3	FAM84B	-0.49003	0.0472233
ENSG00000106682.10	EIF4H	-0.0936712	0.0473714
ENSG00000172575.7	RASGRP1	0.265136	0.0473749
ENSG00000005187.7	ACSM3	0.137281	0.0473975
ENSG00000047346.8	FAM214A	0.226842	0.0474744
ENSG00000258461.1	RP11-164J13.1	0.39852	0.0475854
ENSG00000087502.13	ERGIC2	0.158549	0.0478268
ENSG00000198518.5	HIST1H4E	0.135915	0.048352
ENSG00000105738.6	SIPA1L3	-0.114361	0.0483737
ENSG00000237872.3	POU5F1P4	0.433295	0.0489017
ENSG00000125648.10	SLC25A23	-0.123187	0.0489017
ENSG00000182179.6	UBA7	-0.105875	0.0491714
ENSG00000073910.15	FRY	-0.0768196	0.0494054
ENSG00000104894.7	CD37	-0.119712	0.0494541
ENSG00000196176.7	HIST1H4A	0.142344	0.049553
ENSG00000138073.9	PREB	-0.0972706	0.049553
ENSG00000164124.6	TMEM144	0.301475	0.0495696
ENSG00000109089.7	CDR2L	-0.229158	0.0496248
ENSG00000060237.12	WNK1	-0.0769328	0.0496248
ENSG00000187164.13	KIAA1598	-0.151929	0.0496344
ENSG00000219481.6	NBPF1	0.187364	0.0501359
ENSG00000087303.12	NID2	0.281084	0.0501409
ENSG00000173894.6	CBX2	-0.140926	0.0502236
ENSG00000156983.11	BRPF1	-0.113981	0.0503415
ENSG00000130649.5	CYP2E1	-0.302745	0.0503585
ENSG00000109113.13	RAB34	-0.112667	0.0506976
ENSG00000120899.13	PTK2B	-0.0965746	0.0507962
ENSG00000089057.10	SLC23A2	0.0912532	0.0510129
ENSG00000109320.7	NFKB1	-0.11285	0.0511107
ENSG00000204618.4	RNF39	-0.389141	0.0511356
ENSG00000239704.6	CDRT4	-0.473827	0.0511356
ENSG00000146574.11	CCZ1B	-0.143361	0.0514189
ENSG00000168310.6	IRF2	-0.135468	0.0514966
ENSG00000185989.9	RASA3	-0.113063	0.0515754
ENSG00000136492.4	BRIP1	0.122691	0.0515754
ENSG00000165409.11	TSHR	0.302527	0.0515754
ENSG00000235601.1	RP11-231K24.2	-0.263433	0.0515754
ENSG00000176619.6	LMNB2	-0.116172	0.051589
ENSG00000185482.3	STAC3	0.147598	0.0524507
ENSG00000232197.1	RP11-302L19.1	-0.196533	0.0525368
ENSG00000221963.5	APOL6	-0.149155	0.0525368
ENSG00000113657.8	DPYSL3	-0.450184	0.0525368
ENSG00000187210.8	GCNT1	-0.119131	0.0529107
ENSG00000137497.13	NUMA1	-0.112559	0.0533443
ENSG00000196126.6	HLA-DRB1	-0.226061	0.0534307
ENSG00000064763.6	FAR2	0.188186	0.0534949
ENSG00000116679.11	IVNS1ABP	-0.109821	0.0534949
ENSG00000150337.9	FCGR1A	-0.139654	0.05403
ENSG00000106785.10	TRIM14	0.106844	0.0543709
ENSG00000092010.10	PSME1	-0.101336	0.0543709
ENSG00000160539.4	PPAPDC3	-0.341229	0.0543725
ENSG00000163219.7	ARHGAP25	-0.179947	0.0545162
ENSG00000106804.6	C5	-0.119315	0.0545208
ENSG00000236675.1	MTX1P1	-0.273087	0.0546082
ENSG00000073050.7	XRCC1	-0.126549	0.0553013
ENSG00000140199.7	SLC12A6	-0.122107	0.055371
ENSG00000184293.3	CLECL1	-0.145603	0.055371
ENSG00000146376.6	ARHGAP18	-0.125735	0.055371
ENSG00000247157.2	RP11-434C1.1	-0.530159	0.0553917
ENSG00000185811.12	IKZF1	-0.0733129	0.0562568
ENSG00000004779.5	NDUFAB1	0.138454	0.0565954
ENSG00000167283.3	ATP5L	0.123503	0.0565954
ENSG00000176788.7	BASP1	0.169943	0.0566826
ENSG00000236824.1	BCYRN1	0.433527	0.057833
ENSG00000081665.9	ZNF506	0.127678	0.0578584
ENSG00000136153.15	LMO7	-0.153234	0.0578584
ENSG00000146243.9	IRAK1BP1	0.268908	0.0578584
ENSG00000233844.1	KCNQ5-IT1	0.466521	0.0580195
ENSG00000224745.1	RP11-380G5.2	0.291292	0.0580195
ENSG00000198901.9	PRC1	-0.0887581	0.0580559
ENSG00000204469.8	PRRC2A	-0.0960534	0.0585591
ENSG00000183508.4	FAM46C	0.210325	0.0586666
ENSG00000130810.15	PPAN	-0.162396	0.058903
ENSG00000163468.10	CCT3	-0.0848576	0.0592773
ENSG00000131473.12	ACLY	-0.0843418	0.0594501
ENSG00000168439.12	STIP1	-0.110676	0.0594501
ENSG00000119943.6	PYROXD2	-0.324947	0.0594501
ENSG00000203668.1	CHML	0.133156	0.0595693
ENSG00000171132.9	PRKCE	-0.132604	0.0597124
ENSG00000165233.13	C9orf89	-0.153043	0.0599815
ENSG00000162882.10	HAAO	-0.199934	0.0599851
ENSG00000076382.12	SPAG5	-0.0995649	0.0600379
ENSG00000179335.14	CLK3	-0.113551	0.0602709
ENSG00000100427.11	MLC1	-0.104469	0.0605116
ENSG00000168005.4	C11orf84	-0.167011	0.0607565
ENSG00000058063.11	ATP11B	0.120644	0.0607685
ENSG00000050767.11	COL23A1	-0.133682	0.0610369
ENSG00000153443.8	UBALD1	-0.144654	0.0615518
ENSG00000175130.6	MARCKSL1	-0.107551	0.0615518
ENSG00000147123.10	NDUFB11	0.12225	0.0618724
ENSG00000160216.14	AGPAT3	-0.0947341	0.0620172
ENSG00000234040.3	RP11-254B13.4	0.447278	0.0620505
ENSG00000124134.4	KCNS1	-0.428424	0.0622265
ENSG00000167487.7	KLHL26	-0.13829	0.0622265
ENSG00000268995.1	VN1R82P	0.370513	0.0630635
ENSG00000147601.9	TERF1	0.143257	0.0630781
ENSG00000102893.11	PHKB	0.0977236	0.0630917
ENSG00000147050.10	KDM6A	0.103798	0.0634641
ENSG00000200156.1	RNU5B-1	-0.600152	0.0635297
ENSG00000180818.4	HOXC10	0.538573	0.0636115
ENSG00000196226.2	HIST1H2BB	0.151296	0.0636115
ENSG00000166165.8	CKB	0.321945	0.0638043
ENSG00000133243.4	BTBD2	-0.11399	0.0638043
ENSG00000091409.10	ITGA6	0.339084	0.0638043
ENSG00000243477.1	NAT6	0.186941	0.064017
ENSG00000223642.3	AC008277.1	0.313529	0.064017
ENSG00000258082.1	RP11-443B7.3	-0.3786	0.064017
ENSG00000165476.8	REEP3	0.133026	0.0642053
ENSG00000122507.16	BBS9	0.262067	0.0649044
ENSG00000248636.2	RP11-768F21.1	-0.224828	0.0654057
ENSG00000153317.10	ASAP1	-0.0957354	0.0655439
ENSG00000100034.9	PPM1F	-0.101556	0.0655439
ENSG00000026103.15	FAS	0.322236	0.0659759
ENSG00000243015.2	RN7SL737P	0.323793	0.0661594
ENSG00000017427.11	IGF1	0.292679	0.0661594
ENSG00000116525.9	TRIM62	-0.158558	0.0664748
ENSG00000229638.1	RPL4P4	-0.223961	0.0674292
ENSG00000120675.4	DNAJC15	0.150584	0.0674292
ENSG00000145725.15	PPIP5K2	0.138247	0.0674292
ENSG00000136286.10	MYO1G	-0.10275	0.0674292
ENSG00000096384.15	HSP90AB1	-0.0820226	0.0674292
ENSG00000254838.4	GVINP1	-0.342485	0.0674292
ENSG00000185420.14	SMYD3	-0.0854113	0.0674387
ENSG00000145075.7	CCDC39	0.245056	0.0676423
ENSG00000072864.8	NDE1	-0.0918047	0.0677093
ENSG00000212127.5	TAS2R14	0.35336	0.0677355
ENSG00000183255.7	PTTG1IP	-0.0855405	0.0678018
ENSG00000134460.11	IL2RA	0.32287	0.0680098
ENSG00000233276.2	GPX1	-0.106189	0.0680098
ENSG00000047644.13	WWC3	-0.163915	0.0681272
ENSG00000199347.1	RNU5E-1	-0.566726	0.0681688
ENSG00000064961.14	HMG20B	-0.110013	0.0681688
ENSG00000198707.10	CEP290	0.168564	0.0681688
ENSG00000134986.9	NREP	-0.0983043	0.0681688
ENSG00000162645.8	GBP2	-0.303887	0.0683766
ENSG00000135537.12	LACE1	0.154553	0.0686354
ENSG00000088930.6	XRN2	-0.0746973	0.0686354
ENSG00000187653.10	TMSB4XP8	-0.23532	0.0686354
ENSG00000178950.12	GAK	-0.0973353	0.0686354
ENSG00000237491.4	RP11-206L10.9	0.240237	0.0686354
ENSG00000166886.8	NAB2	-0.162598	0.068797
ENSG00000197226.8	TBC1D9B	-0.0995999	0.068797
ENSG00000162600.7	OMA1	0.185455	0.0691648
ENSG00000166888.6	STAT6	-0.09989	0.0691648
ENSG00000104903.4	LYL1	-0.123794	0.0695613
ENSG00000140553.12	UNC45A	-0.10524	0.0695791
ENSG00000134107.4	BHLHE40	0.167162	0.0697009
ENSG00000119669.3	IRF2BPL	-0.155299	0.0697009
ENSG00000126432.9	PRDX5	0.130604	0.0698035
ENSG00000106080.6	FKBP14	0.249262	0.0698035
ENSG00000156639.7	ZFAND3	-0.0995614	0.0699303
ENSG00000232815.1	LINC00537	-0.205117	0.0699303
ENSG00000181588.15	MEX3D	-0.133668	0.0706331
ENSG00000148943.7	LIN7C	0.14145	0.0706331
ENSG00000110092.3	CCND1	0.363858	0.0708005
ENSG00000146083.7	RNF44	-0.1115	0.0713518
ENSG00000115525.12	ST3GAL5	-0.275164	0.0715217
ENSG00000161642.13	ZNF385A	0.127243	0.0715217
ENSG00000115266.7	APC2	-0.174036	0.0716932
ENSG00000138030.8	KHK	-0.163672	0.0721077
ENSG00000175567.4	UCP2	-0.108666	0.0721172
ENSG00000033867.12	SLC4A7	0.140082	0.0728433
ENSG00000198561.8	CTNND1	-0.162409	0.0728466
ENSG00000136830.7	FAM129B	-0.13933	0.0729512
ENSG00000082074.11	FYB	-0.140702	0.0732537
ENSG00000115183.9	TANC1	0.192981	0.0733379
ENSG00000224940.4	PRRT4	0.350847	0.0733871
ENSG00000179364.9	PACS2	-0.103652	0.0738509
ENSG00000205269.4	TMEM170B	0.139261	0.0739127
ENSG00000081307.8	UBA5	0.122138	0.0740202
ENSG00000108679.8	LGALS3BP	-0.371044	0.0741156
ENSG00000262728.1	AC123768.4	0.17951	0.0747326
ENSG00000087301.4	TXNDC16	0.179565	0.0750678
ENSG00000087087.14	SRRT	-0.0989401	0.0753515
ENSG00000229951.1	AC104695.3	-0.347295	0.0753515
ENSG00000235865.2	GSN-AS1	-0.268562	0.0753515
ENSG00000188313.8	PLSCR1	0.166711	0.0753515
ENSG00000115738.5	ID2	-0.133826	0.0757581
ENSG00000104081.9	BMF	-0.112872	0.075808
ENSG00000120697.4	ALG5	0.111538	0.075808
ENSG00000007047.10	MARK4	-0.119017	0.0761993
ENSG00000101000.4	PROCR	-0.36078	0.0763944
ENSG00000091039.12	OSBPL8	0.143793	0.0764285
ENSG00000163463.7	KRTCAP2	0.178803	0.076612
ENSG00000235552.4	RPL6P27	-0.221642	0.0767563
ENSG00000104936.13	DMPK	-0.214883	0.077118
ENSG00000256981.1	TAS2R18	0.352587	0.077373
ENSG00000176845.8	METRNL	-0.214822	0.077373
ENSG00000105953.10	OGDH	-0.0970352	0.0774618
ENSG00000147274.10	RBMX	-0.0723015	0.0776255
ENSG00000006625.13	GGCT	0.0981021	0.0776866
ENSG00000157110.11	RBPMS	0.187167	0.0776866
ENSG00000092841.14	MYL6	-0.129041	0.0781227
ENSG00000173208.3	ABCD2	0.221104	0.0781227
ENSG00000204389.8	HSPA1A	-0.148925	0.078156
ENSG00000135127.7	CCDC64	0.117282	0.0785186
ENSG00000013288.4	MAN2B2	-0.100468	0.0788439
ENSG00000157514.12	TSC22D3	-0.18581	0.0788439
ENSG00000137038.7	TMEM261	0.125878	0.0791042
ENSG00000106723.12	SPIN1	-0.101052	0.0793337
ENSG00000059804.11	SLC2A3	-0.1742	0.0793337
ENSG00000213563.2	C8orf82	-0.0980518	0.0793337
ENSG00000169375.11	SIN3A	-0.0822334	0.0796873
ENSG00000205544.3	TMEM256	0.18702	0.0796873
ENSG00000082781.7	ITGB5	0.344769	0.0796873
ENSG00000160791.12	CCR5	0.453696	0.079742
ENSG00000160352.11	ZNF714	0.148198	0.0798758
ENSG00000156467.5	UQCRB	0.0884675	0.0798758
ENSG00000184500.10	PROS1	0.259987	0.0798758
ENSG00000180353.6	HCLS1	-0.0914204	0.0800508
ENSG00000135272.5	MDFIC	0.173709	0.0801122
ENSG00000105325.9	FZR1	-0.111773	0.0801122
ENSG00000143858.7	SYT2	0.282228	0.0801122
ENSG00000175455.10	CCDC14	0.101071	0.0801122
ENSG00000176208.4	ATAD5	0.138857	0.0801122
ENSG00000178951.4	ZBTB7A	-0.083461	0.0801122
ENSG00000162073.9	PAQR4	-0.152898	0.0801122
ENSG00000157470.7	FAM81A	0.162818	0.0802579
ENSG00000246705.3	H2AFJ	0.1658	0.0802579
ENSG00000198298.8	ZNF485	0.212971	0.0802716
ENSG00000196230.8	TUBB	-0.0983176	0.080338
ENSG00000198482.6	ZNF808	0.133862	0.080338
ENSG00000164172.14	MOCS2	0.14223	0.080338
ENSG00000213613.2	RP11-380G5.3	0.230904	0.0804599
ENSG00000121281.8	ADCY7	0.109759	0.0805503
ENSG00000249264.1	EEF1A1P9	0.461543	0.0810606
ENSG00000176871.4	WSB2	0.112567	0.0810681
ENSG00000115271.6	GCA	0.173922	0.0810681
ENSG00000170727.7	BOP1	-0.130919	0.0810681
ENSG00000172936.8	MYD88	-0.11933	0.0815816
ENSG00000266037.1	RN7SL3	0.536175	0.0817025
ENSG00000071564.10	TCF3	-0.0873357	0.0817957
ENSG00000257167.2	TMPO-AS1	-0.124727	0.0820455
ENSG00000178425.9	NT5DC1	0.189015	0.0820738
ENSG00000153574.8	RPIA	0.114252	0.0825382
ENSG00000105373.14	GLTSCR2	-0.110287	0.082692
ENSG00000143515.12	ATP8B2	-0.447997	0.082692
ENSG00000186076.4	RP11-887P2.3	-0.482731	0.0828869
ENSG00000125611.11	CHCHD5	0.16591	0.0828869
ENSG00000179750.11	APOBEC3B	-0.154529	0.0829849
ENSG00000113391.12	FAM172A	0.130899	0.0831687
ENSG00000242299.1	RP11-234A1.1	-0.244585	0.0831687
ENSG00000226524.2	RP1-102H19.8	0.475208	0.0831687
ENSG00000168268.6	NT5DC2	-0.105162	0.0832809
ENSG00000253873.1	PCDHGA11	0.264838	0.0833337
ENSG00000132613.10	MTSS1L	-0.137198	0.0836368
ENSG00000169641.9	LUZP1	-0.0983254	0.083688
ENSG00000115902.6	SLC1A4	-0.0990598	0.084466
ENSG00000006757.7	PNPLA4	-0.305445	0.0846509
ENSG00000087008.11	ACOX3	-0.105481	0.0846509
ENSG00000100393.9	EP300	-0.0775487	0.0846509
ENSG00000120709.6	FAM53C	-0.0936201	0.0846509
ENSG00000105865.6	DUS4L	0.186296	0.0846535
ENSG00000221676.1	RNU6ATAC	-0.331783	0.0846724
ENSG00000182903.11	ZNF721	0.149732	0.0846911
ENSG00000105401.2	CDC37	-0.124919	0.0854306
ENSG00000138964.12	PARVG	-0.0922063	0.0854767
ENSG00000166313.14	APBB1	0.205097	0.0855491
ENSG00000110446.5	SLC15A3	-0.287093	0.0860248
ENSG00000198862.9	LTN1	0.118147	0.0860248
ENSG00000102524.7	TNFSF13B	-0.138665	0.0860332
ENSG00000179542.11	SLITRK4	0.202665	0.0860332
ENSG00000010810.13	FYN	-0.276079	0.086035
ENSG00000162769.8	FLVCR1	0.120867	0.0861615
ENSG00000205639.5	MFSD2B	0.493659	0.0861615
ENSG00000203875.6	SNHG5	0.100409	0.0862198
ENSG00000015285.6	WAS	-0.103087	0.0862198
ENSG00000184916.4	JAG2	0.248662	0.0862423
ENSG00000149823.3	VPS51	-0.111564	0.0862423
ENSG00000152056.12	AP1S3	0.159501	0.0869886
ENSG00000167748.6	KLK1	-0.325508	0.0874812
ENSG00000158290.12	CUL4B	0.0917508	0.0876159
ENSG00000184825.4	HIST1H2AH	0.118976	0.0878814
ENSG00000177548.8	RABEP2	-0.10911	0.0878814
ENSG00000169564.5	PCBP1	-0.0898429	0.0879749
ENSG00000089847.8	ANKRD24	0.306243	0.0879749
ENSG00000197971.10	MBP	-0.0831757	0.0881625
ENSG00000106617.9	PRKAG2	0.121887	0.0884627
ENSG00000164796.13	CSMD3	-0.10815	0.0885524
ENSG00000103042.4	SLC38A7	-0.152717	0.0889758
ENSG00000214078.7	CPNE1	-0.0830121	0.0896342
ENSG00000140538.12	NTRK3	-0.413709	0.0897248
ENSG00000215251.3	FASTKD5	-0.105617	0.0902478
ENSG00000114779.15	ABHD14B	0.0977566	0.0904454
ENSG00000001631.10	KRIT1	0.130497	0.0905059
ENSG00000146834.9	MEPCE	-0.0922128	0.0906012
ENSG00000149503.8	INCENP	-0.0983925	0.0909477
ENSG00000033327.8	GAB2	-0.104833	0.0911784
ENSG00000114021.7	NIT2	0.0955322	0.091313
ENSG00000180610.9	ZBTB12P1	0.303118	0.0916683
ENSG00000173535.9	TNFRSF10C	0.339057	0.0916683
ENSG00000174516.10	PELI3	-0.156675	0.0916742
ENSG00000134369.11	NAV1	-0.242448	0.0918978
ENSG00000163154.5	TNFAIP8L2	-0.116049	0.0918978
ENSG00000166398.8	KIAA0355	-0.163247	0.0919915
ENSG00000112110.5	MRPL18	0.0975754	0.0925972
ENSG00000170142.7	UBE2E1	-0.111677	0.0928404
ENSG00000085871.4	MGST2	0.113228	0.0928404
ENSG00000169925.12	BRD3	-0.0874532	0.092945
ENSG00000132334.12	PTPRE	-0.0950639	0.092945
ENSG00000005884.13	ITGA3	-0.322078	0.0929783
ENSG00000152944.4	MED21	0.133246	0.0933515
ENSG00000198719.7	DLL1	-0.50389	0.0940722
ENSG00000115232.9	ITGA4	-0.101854	0.0944583
ENSG00000155849.11	ELMO1	-0.0945632	0.0944583
ENSG00000103495.9	MAZ	-0.119647	0.0944583
ENSG00000227508.2	RP5-894D12.3	-0.368095	0.0944583
ENSG00000114554.7	PLXNA1	-0.106128	0.0946396
ENSG00000188732.6	FAM221A	0.277586	0.0946396
ENSG00000068323.12	TFE3	-0.118199	0.0948711
ENSG00000215252.7	GOLGA8B	0.347269	0.0957448
ENSG00000200795.1	RNU4-1	-0.407488	0.0957448
ENSG00000171552.8	BCL2L1	-0.122527	0.0957448
ENSG00000120686.7	UFM1	0.153112	0.0957448
ENSG00000168300.9	PCMTD1	0.123085	0.0959029
ENSG00000099958.10	DERL3	0.178307	0.0959029
ENSG00000204604.5	ZNF468	0.155125	0.0962192
ENSG00000259471.1	RP11-321F6.1	0.354876	0.0964363
ENSG00000154898.11	CCDC144CP	0.230166	0.0964363
ENSG00000270019.1	RP11-141B14.1	-0.315813	0.0964363
ENSG00000115020.12	PIKFYVE	0.09668	0.0964363
ENSG00000171502.10	COL24A1	-0.128642	0.0964363
ENSG00000125869.5	LAMP5	-0.0852663	0.0964363
ENSG00000156675.11	RAB11FIP1	0.0885486	0.0964363
ENSG00000211455.3	STK38L	0.154987	0.0965564
ENSG00000104341.12	LAPTM4B	-0.168048	0.0966375
ENSG00000163820.10	FYCO1	-0.118193	0.0966375
ENSG00000218672.1	AC008060.7	-0.222003	0.0966375
ENSG00000111642.10	CHD4	-0.0730763	0.0967081
ENSG00000172175.8	MALT1	0.157687	0.0967893
ENSG00000108819.9	PPP1R9B	-0.0924442	0.0968877
ENSG00000083937.4	CHMP2B	0.133562	0.0969384
ENSG00000083844.6	ZNF264	0.146428	0.0976653
ENSG00000180581.6	SRP9P1	-0.291184	0.0976653
ENSG00000170222.11	ADPRM	-0.171048	0.097804
ENSG00000252886.1	RN7SKP197	-0.29536	0.0982402
ENSG00000238227.3	C9orf69	-0.093772	0.0982402
ENSG00000144674.12	GOLGA4	0.123695	0.0982402
ENSG00000232940.1	HCG25	0.400961	0.0982402
ENSG00000260804.2	RP11-566E18.3	0.138857	0.0983567
ENSG00000230266.1	XXYLT1-AS2	0.431435	0.0983567
ENSG00000103485.13	QPRT	-0.151055	0.0983567
ENSG00000131002.7	TXLNG2P	0.128046	0.0983567
ENSG00000116251.5	RPL22	-0.0933989	0.0983567
ENSG00000135776.4	ABCB10	-0.0912306	0.0983679
ENSG00000146802.8	TMEM168	0.152468	0.0988655
ENSG00000187790.6	FANCM	0.133998	0.0992589
ENSG00000147459.13	DOCK5	0.0738043	0.0992589
ENSG00000105245.5	NUMBL	-0.164512	0.0992589
ENSG00000267852.1	CTB-133G6.2	0.353019	0.0992589
ENSG00000114120.7	SLC25A36	0.135627	0.0992589
ENSG00000184635.9	ZNF93	0.127243	0.0992589
ENSG00000154016.9	GRAP	-0.30405	0.0992826
ENSG00000184937.8	WT1	-0.0988585	0.0996673
ENSG00000151012.9	SLC7A11	0.266465	0.0998323
ENSG00000128000.11	ZNF780B	0.0991837	0.0999013
ENSG00000176108.5	CHMP6	-0.133296	0.100125
ENSG00000013523.5	ANGEL1	0.117455	0.100808
ENSG00000168566.11	SNRNP48	0.130982	0.101692
ENSG00000100266.13	PACSIN2	-0.107757	0.101818
ENSG00000196663.11	TECPR2	-0.140326	0.101861
ENSG00000184348.2	HIST1H2AK	0.149616	0.101971
ENSG00000183864.4	TOB2	-0.0909013	0.10222
ENSG00000130803.10	ZNF317	-0.083157	0.103258
ENSG00000108839.7	ALOX12	0.148185	0.103258
ENSG00000140396.8	NCOA2	0.0928428	0.103317
ENSG00000106819.7	ASPN	0.248119	0.103317
ENSG00000073849.10	ST6GAL1	-0.091626	0.103317
ENSG00000099219.9	ERMP1	0.0942199	0.103317
ENSG00000128604.14	IRF5	0.102098	0.103317
ENSG00000118507.11	AKAP7	-0.241201	0.103317
ENSG00000166272.12	WBP1L	-0.0971244	0.103317
ENSG00000167394.8	ZNF668	-0.140889	0.103323
ENSG00000105270.10	CLIP3	0.202218	0.103323
ENSG00000140829.7	DHX38	-0.110177	0.103378
ENSG00000203832.6	NBPF20	-0.322875	0.103488
ENSG00000196839.8	ADA	0.115061	0.103634
ENSG00000198689.5	SLC9A6	-0.10695	0.103756
ENSG00000151422.8	FER	0.165416	0.103909
ENSG00000067596.6	DHX8	-0.0929354	0.103965
ENSG00000077420.11	APBB1IP	-0.0942607	0.104002
ENSG00000156384.10	SFR1	0.183994	0.104035
ENSG00000074855.6	ANO8	-0.138991	0.104035
ENSG00000196465.6	MYL6B	-0.129495	0.104091
ENSG00000177465.4	ACOT4	0.340744	0.104193
ENSG00000184058.8	TBX1	0.142364	0.104279
ENSG00000164073.5	MFSD8	0.154356	0.104279
ENSG00000100353.13	EIF3D	-0.088295	0.104279
ENSG00000164609.5	SLU7	-0.110605	0.104279
ENSG00000188229.5	TUBB4B	-0.100372	0.104279
ENSG00000233695.1	GAS6-AS1	0.311245	0.104426
ENSG00000187607.11	ZNF286A	-0.148787	0.104426
ENSG00000093144.14	ECHDC1	0.118519	0.105167
ENSG00000271857.1	RP1-244F24.1	0.202074	0.105197
ENSG00000132199.14	ENOSF1	0.0846023	0.105197
ENSG00000138443.11	ABI2	-0.114952	0.105197
ENSG00000186665.8	C17orf58	0.179605	0.10528
ENSG00000113758.9	DBN1	0.110753	0.105369
ENSG00000242539.2	AC007620.3	0.209422	0.105412
ENSG00000272335.1	RP11-53O19.3	0.188075	0.105412
ENSG00000248473.1	CTC-338M12.2	-0.51816	0.105491
ENSG00000173889.11	PHC3	0.0943689	0.105776
ENSG00000112685.9	EXOC2	-0.0959247	0.106222
ENSG00000138107.7	ACTR1A	-0.0941722	0.106249
ENSG00000143614.7	GATAD2B	-0.0833613	0.106249
ENSG00000183598.3	HIST2H3D	0.0932227	0.106249
ENSG00000130749.5	ZC3H4	-0.081291	0.106249
ENSG00000185950.7	IRS2	-0.149105	0.106249
ENSG00000253641.1	RP11-981G7.2	0.377442	0.106559
ENSG00000111305.14	GSG1	-0.440962	0.106942
ENSG00000184584.8	TMEM173	-0.114791	0.106942
ENSG00000198805.7	PNP	-0.0809374	0.106942
ENSG00000186918.9	ZNF395	0.117697	0.107009
ENSG00000110315.2	RNF141	0.167642	0.107121
ENSG00000145860.7	RNF145	-0.126875	0.107121
ENSG00000196743.4	GM2A	0.0925877	0.107121
ENSG00000196511.9	TPK1	0.135616	0.107121
ENSG00000176454.9	LPCAT4	-0.113119	0.107167
ENSG00000152818.14	UTRN	-0.0794033	0.108172
ENSG00000159917.10	ZNF235	0.183479	0.108299
ENSG00000077684.11	PHF17	0.0878778	0.108504
ENSG00000182979.13	MTA1	-0.0932635	0.108619
ENSG00000155974.7	GRIP1	0.128884	0.109009
ENSG00000217555.8	CKLF	0.198017	0.109124
ENSG00000261997.1	RP11-212I21.4	0.390069	0.109168
ENSG00000095370.15	SH2D3C	-0.137071	0.10959
ENSG00000268357.1	VN1R81P	0.286589	0.10959
ENSG00000182048.7	TRPC2	-0.299782	0.109754
ENSG00000104549.7	SQLE	0.0844015	0.109754
ENSG00000103404.10	USP31	-0.0816966	0.109754
ENSG00000204256.8	BRD2	-0.0951883	0.109754
ENSG00000100014.15	SPECC1L	-0.106485	0.109754
ENSG00000142227.6	EMP3	-0.111544	0.109754
ENSG00000160209.14	PDXK	-0.0836556	0.110533
ENSG00000104331.4	IMPAD1	0.111142	0.110545
ENSG00000173221.9	GLRX	-0.147401	0.110556
ENSG00000146904.4	EPHA1	-0.198446	0.110556
ENSG00000169926.5	KLF13	-0.0803827	0.110556
ENSG00000082898.12	XPO1	0.0791403	0.110556
ENSG00000270277.1	RP11-65L3.2	0.335865	0.111182
ENSG00000100503.19	NIN	-0.0798745	0.111241
ENSG00000110057.3	UNC93B1	-0.115079	0.111302
ENSG00000168329.9	CX3CR1	-0.24448	0.111521
ENSG00000113368.7	LMNB1	-0.0635597	0.111627
ENSG00000114993.11	RTKN	-0.164253	0.112248
ENSG00000196544.6	C17orf59	-0.163992	0.112436
ENSG00000141506.9	PIK3R5	0.0824564	0.113301
ENSG00000214717.5	ZBED1	-0.0824902	0.11366
ENSG00000178460.13	MCMDC2	0.183133	0.11366
ENSG00000197258.5	EIF4BP6	-0.221168	0.11366
ENSG00000125257.9	ABCC4	-0.0865277	0.114171
ENSG00000235609.4	AF127936.7	0.363199	0.114477
ENSG00000147679.7	UTP23	0.144648	0.114477
ENSG00000198853.7	RUSC2	-0.262032	0.114508
ENSG00000105671.7	DDX49	-0.106695	0.115329
ENSG00000091073.15	DTX2	-0.102651	0.115334
ENSG00000105227.10	PRX	0.328154	0.115731
ENSG00000139436.16	GIT2	-0.0860567	0.115731
ENSG00000197312.7	DDI2	0.0932054	0.115773
ENSG00000139182.9	CLSTN3	-0.170698	0.11579
ENSG00000130714.11	POMT1	0.130211	0.11579
ENSG00000160746.8	ANO10	-0.186589	0.11579
ENSG00000196683.6	TOMM7	0.0950662	0.11579
ENSG00000102043.11	MTMR8	0.205419	0.11579
ENSG00000143641.8	GALNT2	-0.115759	0.11579
ENSG00000102870.4	ZNF629	-0.0973548	0.11579
ENSG00000128654.9	MTX2	0.134686	0.11579
ENSG00000176595.3	KBTBD11	0.0900479	0.11579
ENSG00000197872.7	FAM49A	0.1509	0.11579
ENSG00000079432.3	CIC	-0.0924244	0.11579
ENSG00000137411.12	VARS2	0.109244	0.115879
ENSG00000126882.8	FAM78A	-0.0914544	0.116357
ENSG00000113441.11	LNPEP	0.119558	0.11638
ENSG00000212802.3	RPL15P3	-0.2739	0.116391
ENSG00000132510.6	KDM6B	-0.100106	0.116632
ENSG00000182872.11	RBM10	-0.101292	0.116632
ENSG00000100979.10	PLTP	-0.272951	0.116676
ENSG00000101638.9	ST8SIA5	-0.253979	0.116849
ENSG00000110619.12	CARS	-0.111007	0.116849
ENSG00000264653.1	MIR5194	0.391901	0.116849
ENSG00000120832.5	MTERFD3	0.211301	0.117136
ENSG00000119013.4	NDUFB3	0.111134	0.117136
ENSG00000074582.8	BCS1L	0.109316	0.117286
ENSG00000182551.9	ADI1	-0.0759613	0.117498
ENSG00000104763.13	ASAH1	0.0933511	0.117498
ENSG00000167658.11	EEF2	-0.0992379	0.117649
ENSG00000167977.4	KCTD5	0.104699	0.117649
ENSG00000162222.9	TTC9C	-0.124329	0.11783
ENSG00000133597.5	ADCK2	0.156208	0.11783
ENSG00000153006.10	SREK1IP1	0.143201	0.117891
ENSG00000105854.8	PON2	-0.184015	0.117917
ENSG00000166681.9	NGFRAP1	0.157982	0.117917
ENSG00000164919.6	COX6C	0.106039	0.117917
ENSG00000142089.11	IFITM3	0.275421	0.117919
ENSG00000122694.11	GLIPR2	-0.19795	0.118108
ENSG00000162928.8	PEX13	0.130762	0.118108
ENSG00000261589.1	CTC-462L7.1	0.365108	0.118108
ENSG00000214975.4	PPIAP29	-0.971219	0.118108
ENSG00000104660.13	LEPROTL1	-0.108955	0.118114
ENSG00000188483.6	IER5L	-0.247406	0.118114
ENSG00000253522.2	MIR146A	-0.431598	0.118514
ENSG00000110906.8	KCTD10	-0.0950887	0.118514
ENSG00000170876.7	TMEM43	-0.0874331	0.118722
ENSG00000139977.9	NAA30	0.135159	0.118759
ENSG00000110841.9	PPFIBP1	0.141251	0.118759
ENSG00000213023.5	SYT3	-0.277608	0.118777
ENSG00000185883.6	ATP6V0C	-0.314524	0.119185
ENSG00000071073.8	MGAT4A	0.297011	0.119212
ENSG00000125885.9	MCM8	0.0882602	0.119212
ENSG00000151914.13	DST	0.151287	0.120619
ENSG00000211695.2	TRGV9	-0.125239	0.120619
ENSG00000171811.8	TTC40	-0.353359	0.120619
ENSG00000101843.14	PSMD10	0.119767	0.121107
ENSG00000134897.9	BIVM	0.18508	0.121152
ENSG00000125995.11	ROMO1	0.118244	0.121387
ENSG00000165915.9	SLC39A13	-0.123463	0.121494
ENSG00000203879.7	GDI1	-0.127506	0.121494
ENSG00000164930.7	FZD6	0.235049	0.121727
ENSG00000196532.4	HIST1H3C	0.18578	0.122023
ENSG00000138658.11	C4orf21	0.10823	0.12212
ENSG00000198168.4	SVIP	0.182893	0.122143
ENSG00000196705.4	ZNF431	0.106026	0.122309
ENSG00000160326.9	SLC2A6	0.16594	0.12232
ENSG00000141858.7	SAMD1	-0.0992509	0.12232
ENSG00000071189.17	SNX13	0.12293	0.122489
ENSG00000117625.9	RCOR3	0.107452	0.122489
ENSG00000101246.15	ARFRP1	0.115435	0.122667
ENSG00000167618.5	LAIR2	-0.332001	0.122992
ENSG00000143514.12	TP53BP2	-0.0861909	0.123043
ENSG00000215246.4	RP11-43F13.3	-0.154398	0.123043
ENSG00000091136.9	LAMB1	0.204772	0.123066
ENSG00000264462.1	MIR3648	-0.46347	0.123748
ENSG00000239998.1	LILRA2	-0.138616	0.123904
ENSG00000060971.13	ACAA1	-0.105856	0.124041
ENSG00000211689.2	TRGC1	0.0900163	0.124135
ENSG00000149657.15	LSM14B	-0.087676	0.124135
ENSG00000172081.9	MOB3A	-0.0892885	0.124534
ENSG00000232388.2	LINC00493	0.152364	0.124706
ENSG00000204138.8	PHACTR4	-0.0902106	0.124714
ENSG00000077238.9	IL4R	-0.132133	0.12499
ENSG00000180376.12	CCDC66	0.109827	0.12499
ENSG00000152582.8	SPEF2	-0.127082	0.12499
ENSG00000135744.7	AGT	0.187386	0.12499
ENSG00000081692.8	JMJD4	-0.153285	0.12499
ENSG00000179085.7	DPM3	0.12998	0.12499
ENSG00000160294.6	MCM3AP	-0.0722429	0.125313
ENSG00000111215.7	PRR4	0.177365	0.125349
ENSG00000161638.6	ITGA5	0.0808903	0.125434
ENSG00000184261.4	KCNK12	0.37293	0.125434
ENSG00000027697.8	IFNGR1	-0.118493	0.125489
ENSG00000171604.7	CXXC5	-0.0811009	0.12558
ENSG00000100479.8	POLE2	0.105218	0.12558
ENSG00000083812.7	ZNF324	-0.108116	0.125614
ENSG00000130202.5	PVRL2	-0.114931	0.125614
ENSG00000136636.8	KCTD3	0.0945492	0.125614
ENSG00000162191.9	UBXN1	-0.104338	0.125836
ENSG00000185477.4	GPRIN3	0.399258	0.125934
ENSG00000176915.10	ANKLE2	-0.0785568	0.126134
ENSG00000149571.6	KIRREL3	-0.197453	0.126184
ENSG00000223745.3	RP4-717I23.3	0.132123	0.126213
ENSG00000134256.8	CD101	-0.205999	0.126733
ENSG00000103274.6	NUBP1	-0.146572	0.126733
ENSG00000251322.3	SHANK3	0.241926	0.126881
ENSG00000101856.8	PGRMC1	0.110211	0.126881
ENSG00000144843.7	ADPRH	0.181645	0.126881
ENSG00000173611.13	SCAI	0.137548	0.126881
ENSG00000087077.7	TRIP6	-0.0916137	0.126881
ENSG00000104814.8	MAP4K1	-0.149625	0.127089
ENSG00000251815.1	SNORD116-26	0.418321	0.127089
ENSG00000197601.8	FAR1	0.119014	0.127259
ENSG00000078369.13	GNB1	-0.0665767	0.127262
ENSG00000067533.5	RRP15	0.121887	0.127636
ENSG00000130402.7	ACTN4	-0.0941915	0.127636
ENSG00000149639.10	SOGA1	-0.0915515	0.127703
ENSG00000111679.12	PTPN6	-0.0920073	0.127877
ENSG00000167771.5	RCOR2	0.283697	0.127895
ENSG00000125945.10	ZNF436	-0.177997	0.127895
ENSG00000103196.7	CRISPLD2	-0.426516	0.127895
ENSG00000065989.11	PDE4A	-0.169151	0.12791
ENSG00000198252.7	STYX	0.134697	0.12791
ENSG00000180921.6	FAM83H	-0.097396	0.127923
ENSG00000197119.8	SLC25A29	-0.125299	0.127923
ENSG00000260417.1	CTD-2542L18.1	0.163952	0.127923
ENSG00000163558.8	PRKCI	0.118755	0.127923
ENSG00000123933.10	MXD4	-0.109662	0.12818
ENSG00000185359.8	HGS	-0.0991192	0.12818
ENSG00000181472.4	ZBTB2	-0.11366	0.12818
ENSG00000117461.10	PIK3R3	-0.139729	0.128467
ENSG00000109111.10	SUPT6H	-0.0836868	0.128467
ENSG00000237263.1	MAPK6PS3	0.408321	0.128467
ENSG00000205670.6	SMIM11	0.165546	0.128643
ENSG00000115325.9	DOK1	-0.103027	0.128643
ENSG00000185158.8	LRRC37B	0.185352	0.128867
ENSG00000128923.6	FAM63B	0.145248	0.128867
ENSG00000033050.3	ABCF2	-0.08481	0.128964
ENSG00000102096.9	PIM2	-0.0981425	0.129074
ENSG00000267254.1	CTD-2162K18.5	0.212913	0.129156
ENSG00000183691.4	NOG	-0.439511	0.129965
ENSG00000213693.4	SEC14L1P1	0.282228	0.129965
ENSG00000174373.11	RALGAPA1	0.114801	0.129965
ENSG00000102743.10	SLC25A15	0.151762	0.129965
ENSG00000129680.11	MAP7D3	-0.0966136	0.129965
ENSG00000162927.9	PUS10	0.175588	0.130012
ENSG00000135315.7	KIAA1009	0.148667	0.130187
ENSG00000134996.11	OSTF1	-0.0879671	0.130187
ENSG00000260482.1	CTD-2196E14.9	0.168062	0.130728
ENSG00000198919.8	DZIP3	0.202285	0.130834
ENSG00000265727.1	RN7SL648P	0.353862	0.130834
ENSG00000116809.7	ZBTB17	-0.113535	0.131861
ENSG00000048028.7	USP28	0.122861	0.132101
ENSG00000075151.15	EIF4G3	-0.0692185	0.132273
ENSG00000243646.4	IL10RB	-0.106883	0.132369
ENSG00000145103.8	ILDR1	0.326916	0.132487
ENSG00000117399.9	CDC20	-0.090032	0.132487
ENSG00000166311.5	SMPD1	0.14508	0.132487
ENSG00000185946.11	RNPC3	0.107866	0.132487
ENSG00000135541.16	AHI1	0.131709	0.132487
ENSG00000160213.5	CSTB	-0.11895	0.132505
ENSG00000223773.2	CD99P1	0.150767	0.132505
ENSG00000127418.10	FGFRL1	-0.122217	0.13251
ENSG00000167733.9	HSD11B1L	-0.290347	0.132801
ENSG00000249592.1	RP11-440L14.1	-0.160421	0.132871
ENSG00000096433.6	ITPR3	0.138633	0.133124
ENSG00000165572.6	KBTBD6	0.141361	0.133521
ENSG00000156860.11	FBRS	-0.0802162	0.133747
ENSG00000213753.6	RPL23AP79	-0.111683	0.134022
ENSG00000020633.14	RUNX3	-0.0795671	0.134022
ENSG00000147443.8	DOK2	-0.0973202	0.134022
ENSG00000257742.1	RP11-350F4.2	0.174297	0.134022
ENSG00000138758.7	SEPT11	0.0746819	0.134039
ENSG00000112893.5	MAN2A1	0.0997499	0.134277
ENSG00000224660.1	SH3BP5-AS1	0.193751	0.134555
ENSG00000140464.15	PML	-0.09808	0.134555
ENSG00000163113.10	OTUD7B	0.154058	0.134639
ENSG00000115159.11	GPD2	-0.103903	0.134639
ENSG00000197694.9	SPTAN1	-0.0846101	0.134639
ENSG00000181826.5	RELL1	-0.160391	0.134639
ENSG00000134324.7	LPIN1	-0.119555	0.134827
ENSG00000178988.10	MRFAP1L1	0.13903	0.134827
ENSG00000261377.1	RP11-578F21.12	0.0934844	0.134827
ENSG00000168671.5	UGT3A2	-0.351835	0.134827
ENSG00000266733.1	TBC1D29	0.471459	0.134866
ENSG00000114867.15	EIF4G1	-0.0798229	0.134866
ENSG00000131730.11	CKMT2	0.255972	0.134866
ENSG00000092330.11	TINF2	-0.105113	0.13502
ENSG00000160410.10	SHKBP1	-0.098778	0.13502
ENSG00000205542.6	TMSB4X	0.0737863	0.13502
ENSG00000169397.3	RNASE3	0.133438	0.13504
ENSG00000169884.9	WNT10B	-0.127087	0.13504
ENSG00000227191.2	TRGC2	-0.0820335	0.135485
ENSG00000122483.13	CCDC18	0.109275	0.135485
ENSG00000070159.9	PTPN3	-0.147055	0.135485
ENSG00000078269.9	SYNJ2	0.125427	0.135668
ENSG00000077935.12	SMC1B	0.305486	0.135726
ENSG00000110218.4	PANX1	-0.127177	0.135726
ENSG00000126259.15	KIRREL2	0.173341	0.135726
ENSG00000064932.11	SBNO2	-0.0920932	0.136071
ENSG00000175556.12	LONRF3	0.154666	0.136175
ENSG00000260910.1	LINC00565	0.280435	0.136175
ENSG00000149798.3	CDC42EP2	-0.340999	0.136708
ENSG00000109674.3	NEIL3	0.106303	0.136928
ENSG00000167851.9	CD300A	0.195512	0.137026
ENSG00000236499.2	LINC00896	-0.381182	0.137033
ENSG00000008952.12	SEC62	0.106392	0.137267
ENSG00000254690.1	GS1-393G12.12	0.398975	0.137267
ENSG00000234511.4	C5orf58	0.34708	0.137267
ENSG00000188215.5	DCUN1D3	-0.132478	0.137267
ENSG00000103222.14	ABCC1	-0.0862797	0.137269
ENSG00000226479.3	TMEM185B	-0.104811	0.137385
ENSG00000169100.8	SLC25A6	-0.0976022	0.137385
ENSG00000260001.2	TGFBR3L	0.255199	0.137628
ENSG00000102007.6	PLP2	-0.0995784	0.137628
ENSG00000189298.9	ZKSCAN3	-0.123511	0.137628
ENSG00000158887.11	MPZ	-0.222279	0.137658
ENSG00000155744.5	FAM126B	0.129521	0.137658
ENSG00000160679.8	CHTOP	-0.0803461	0.137723
ENSG00000120699.8	EXOSC8	0.0897079	0.137723
ENSG00000115364.9	MRPL19	0.112504	0.1387
ENSG00000072062.9	PRKACA	-0.102817	0.1387
ENSG00000229036.3	RP1-20N2.6	0.202514	0.138914
ENSG00000063978.11	RNF4	-0.0757682	0.138914
ENSG00000135968.15	GCC2	0.131695	0.138914
ENSG00000268785.1	RPL7P50	0.404608	0.138914
ENSG00000106853.12	PTGR1	0.154768	0.138914
ENSG00000083544.9	TDRD3	0.115726	0.13897
ENSG00000203362.2	RP3-337H4.8	0.387334	0.139266
ENSG00000147437.5	GNRH1	0.220892	0.139453
ENSG00000120805.9	ARL1	0.107512	0.139453
ENSG00000130699.12	TAF4	-0.0813992	0.139453
ENSG00000187688.10	TRPV2	-0.0980281	0.139648
ENSG00000130726.7	TRIM28	-0.0841715	0.14042
ENSG00000224546.2	EIF4BP3	0.197931	0.140511
ENSG00000203667.5	COX20	0.135108	0.140511
ENSG00000011405.9	PIK3C2A	0.124298	0.140955
ENSG00000175029.12	CTBP2	-0.0799835	0.141461
ENSG00000174007.7	CEP19	-0.205802	0.141531
ENSG00000123975.4	CKS2	-0.102236	0.141833
ENSG00000259953.1	RP11-4O1.2	0.100189	0.141836
ENSG00000062598.13	ELMO2	-0.0855873	0.141836
ENSG00000141556.16	TBCD	-0.0896394	0.141915
ENSG00000090013.5	BLVRB	0.117835	0.14203
ENSG00000100580.7	TMED8	-0.0811683	0.142195
ENSG00000066427.17	ATXN3	0.108298	0.142263
ENSG00000196510.8	ANAPC7	-0.0834656	0.14229
ENSG00000114648.7	KLHL18	-0.09495	0.142686
ENSG00000164889.8	SLC4A2	-0.110374	0.142776
ENSG00000162236.7	STX5	-0.100859	0.142776
ENSG00000075240.12	GRAMD4	-0.0795321	0.142776
ENSG00000145390.7	USP53	0.27005	0.142777
ENSG00000231154.1	MORF4L2-AS1	0.391117	0.142777
ENSG00000179950.9	PUF60	-0.0871357	0.14279
ENSG00000173548.8	SNX33	-0.124357	0.14279
ENSG00000164758.3	MED30	0.122092	0.143046
ENSG00000118276.7	B4GALT6	0.210596	0.143046
ENSG00000163257.6	DCAF16	0.0859765	0.143046
ENSG00000165916.4	PSMC3	-0.0952433	0.14306
ENSG00000166598.8	HSP90B1	0.0792815	0.143101
ENSG00000126457.16	PRMT1	-0.0879238	0.143187
ENSG00000035115.17	SH3YL1	0.0959354	0.144048
ENSG00000105701.11	FKBP8	-0.0904085	0.144323
ENSG00000007372.16	PAX6	0.26641	0.144368
ENSG00000229140.4	CCDC26	0.123673	0.144785
ENSG00000246851.1	RP11-544A12.8	0.290159	0.144977
ENSG00000110108.5	TMEM109	0.0897029	0.144977
ENSG00000170312.11	CDK1	0.106829	0.144977
ENSG00000104518.6	GSDMD	-0.100203	0.144977
ENSG00000121774.13	KHDRBS1	-0.0705756	0.145087
ENSG00000159217.5	IGF2BP1	-0.0720572	0.145175
ENSG00000261346.1	RP11-297C4.2	0.244841	0.145882
ENSG00000026036.16	RTEL1-TNFRSF6B	0.238428	0.145882
ENSG00000121716.14	PILRB	0.153293	0.146008
ENSG00000185670.7	ZBTB3	-0.149234	0.146008
ENSG00000227948.3	AC003989.4	0.403507	0.146008
ENSG00000107554.11	DNMBP	-0.135315	0.146012
ENSG00000152413.10	HOMER1	-0.127444	0.146012
ENSG00000181026.13	AEN	-0.080937	0.146012
ENSG00000180549.7	FUT7	0.133888	0.146012
ENSG00000101160.9	CTSZ	0.086482	0.14621
ENSG00000258323.1	RP1-267L14.3	0.334516	0.146332
ENSG00000111348.4	ARHGDIB	-0.0830529	0.146368
ENSG00000183597.11	TANGO2	-0.127338	0.146368
ENSG00000257027.1	RP11-705C15.3	-0.134439	0.146368
ENSG00000104228.8	TRIM35	-0.0853309	0.146368
ENSG00000187980.6	PLA2G2C	0.251603	0.146368
ENSG00000257176.1	RP11-996F15.2	0.380347	0.146636
ENSG00000143119.8	CD53	-0.0832181	0.146669
ENSG00000166436.11	TRIM66	0.098055	0.146987
ENSG00000070047.7	PHRF1	-0.088475	0.147033
ENSG00000126247.6	CAPNS1	-0.100707	0.147033
ENSG00000226435.6	ANKRD18DP	0.133518	0.147033
ENSG00000163956.6	LRPAP1	0.0887646	0.147205
ENSG00000157224.11	CLDN12	0.149856	0.147205
ENSG00000183283.11	DAZAP2	-0.0851809	0.14754
ENSG00000168386.14	FILIP1L	0.189252	0.147714
ENSG00000149115.9	TNKS1BP1	-0.0983243	0.148004
ENSG00000173166.13	RAPH1	-0.337327	0.148004
ENSG00000068793.13	CYFIP1	0.0924409	0.148249
ENSG00000102879.11	CORO1A	-0.0966435	0.148698
ENSG00000165181.12	C9orf84	0.392427	0.148726
ENSG00000120992.13	LYPLA1	0.0983157	0.148726
ENSG00000139734.13	DIAPH3	0.101706	0.148905
ENSG00000203504.3	AC131571.2	0.443064	0.148908
ENSG00000138036.14	DYNC2LI1	0.165252	0.148908
ENSG00000183337.12	BCOR	-0.0706361	0.148908
ENSG00000134769.17	DTNA	-0.0945987	0.148908
ENSG00000215158.5	RP11-1023L17.1	0.162788	0.148908
ENSG00000105085.6	MED26	-0.110188	0.14957
ENSG00000197380.6	DACT3	0.259591	0.14957
ENSG00000007968.6	E2F2	-0.102718	0.14957
ENSG00000128016.4	ZFP36	0.100329	0.14957
ENSG00000172432.14	GTPBP2	-0.084226	0.14957
ENSG00000230202.1	RP11-632C17__A.1	-0.272564	0.14957
ENSG00000188816.3	HMX2	-0.101061	0.14957
ENSG00000130811.6	EIF3G	-0.0923495	0.149701
ENSG00000159618.11	GPR114	0.0983217	0.149732
ENSG00000172349.12	IL16	-0.133739	0.149746
ENSG00000133195.7	SLC39A11	-0.0872294	0.149746
ENSG00000147872.5	PLIN2	0.146306	0.14984
ENSG00000051382.4	PIK3CB	0.0900173	0.15015
ENSG00000124228.10	DDX27	-0.0917496	0.150362
ENSG00000120688.7	WBP4	0.124948	0.150362
ENSG00000266805.1	RP11-61L19.1	0.390166	0.150712
ENSG00000130717.8	UCK1	-0.108734	0.150712
ENSG00000149782.7	PLCB3	-0.102618	0.150751
ENSG00000165169.6	DYNLT3	0.284906	0.150751
ENSG00000136715.13	SAP130	-0.0953091	0.150751
ENSG00000145087.8	STXBP5L	0.164463	0.150797
ENSG00000169727.8	GPS1	-0.087038	0.151343
ENSG00000123178.10	SPRYD7	0.15523	0.151343
ENSG00000079332.10	SAR1A	0.0781427	0.151443
ENSG00000171282.9	RP11-1055B8.7	-0.0798025	0.151981
ENSG00000122359.13	ANXA11	-0.0803995	0.152394
ENSG00000260077.1	RP11-254F7.2	0.251203	0.152394
ENSG00000259826.1	RP11-467D6.1	-0.348267	0.15281
ENSG00000174996.7	KLC2	-0.155435	0.152846
ENSG00000067829.14	IDH3G	-0.102317	0.153302
ENSG00000091879.9	ANGPT2	0.193988	0.153435
ENSG00000124214.15	STAU1	-0.0758894	0.153969
ENSG00000122026.6	RPL21	0.0708316	0.154051
ENSG00000142541.12	RPL13A	0.0687778	0.154904
ENSG00000102144.9	PGK1	-0.0635057	0.154982
ENSG00000152700.9	SAR1B	0.102758	0.155074
ENSG00000139921.8	TMX1	0.110988	0.155074
ENSG00000137812.15	CASC5	0.0963061	0.155074
ENSG00000154781.11	CCDC174	-0.112859	0.155419
ENSG00000189007.11	ADAT2	0.0978149	0.155472
ENSG00000142544.6	CTU1	-0.132377	0.155574
ENSG00000105329.5	TGFB1	-0.0842239	0.155574
ENSG00000108578.10	BLMH	-0.0906134	0.155791
ENSG00000134186.7	PRPF38B	0.0807721	0.155791
ENSG00000164096.10	C4orf3	0.110482	0.155872
ENSG00000127914.12	AKAP9	0.123983	0.15608
ENSG00000187008.2	PKD1L3	-0.192236	0.156104
ENSG00000005022.5	SLC25A5	-0.0735398	0.156119
ENSG00000111850.6	SMIM8	0.195053	0.156378
ENSG00000001036.9	FUCA2	0.095488	0.156684
ENSG00000117569.14	PTBP2	0.137668	0.156718
ENSG00000257151.1	PWAR6	0.136229	0.156718
ENSG00000197409.6	HIST1H3D	0.108886	0.156924
ENSG00000095015.5	MAP3K1	-0.0791322	0.156924
ENSG00000137145.16	DENND4C	0.12097	0.156987
ENSG00000111266.4	DUSP16	0.254027	0.156987
ENSG00000163812.9	ZDHHC3	0.0717039	0.15803
ENSG00000147121.11	KRBOX4	0.211807	0.15808
ENSG00000147687.12	TATDN1	0.116536	0.158219
ENSG00000125826.15	RBCK1	-0.0978504	0.158549
ENSG00000131503.16	ANKHD1	0.17163	0.158549
ENSG00000164989.11	CCDC171	0.159402	0.158584
ENSG00000228623.2	ZNF883	0.427972	0.158898
ENSG00000134452.15	FBXO18	-0.0845449	0.15928
ENSG00000106460.14	TMEM106B	0.128969	0.159498
ENSG00000007202.10	KIAA0100	-0.0603372	0.159735
ENSG00000163082.9	SGPP2	0.25112	0.159735
ENSG00000203485.8	INF2	-0.0997957	0.159735
ENSG00000144395.13	CCDC150	0.134102	0.159735
ENSG00000159164.5	SV2A	-0.343312	0.159735
ENSG00000148655.10	C10orf11	0.163971	0.159735
ENSG00000151414.10	NEK7	0.116265	0.159735
ENSG00000103275.14	UBE2I	-0.0779576	0.159735
ENSG00000167671.7	UBXN6	-0.0922556	0.159735
ENSG00000099810.14	MTAP	0.0954034	0.159938
ENSG00000037474.10	NSUN2	-0.0754951	0.160093
ENSG00000057019.11	DCBLD2	0.145175	0.160429
ENSG00000142784.11	WDTC1	-0.0934736	0.16057
ENSG00000145901.10	TNIP1	-0.0881708	0.160982
ENSG00000186354.6	C9orf47	-0.201412	0.16104
ENSG00000141577.9	AZI1	-0.125919	0.16104
ENSG00000069509.5	FUNDC1	0.159053	0.16104
ENSG00000150457.7	LATS2	-0.113724	0.161215
ENSG00000204120.10	GIGYF2	-0.0631611	0.161928
ENSG00000160447.6	PKN3	0.115383	0.162015
ENSG00000170345.5	FOS	0.264629	0.162085
ENSG00000142409.4	ZNF787	-0.10176	0.162829
ENSG00000198130.10	HIBCH	0.114346	0.162829
ENSG00000204960.5	BLACE	-0.374682	0.163069
ENSG00000144559.6	TAMM41	0.113404	0.163071
ENSG00000004478.5	FKBP4	-0.071887	0.163071
ENSG00000094804.5	CDC6	0.0719846	0.163071
ENSG00000160714.5	UBE2Q1	-0.0963735	0.163774
ENSG00000155011.4	DKK2	-0.430276	0.163774
ENSG00000105732.9	ZNF574	-0.109852	0.163865
ENSG00000129951.14	LPPR3	-0.0963629	0.164167
ENSG00000109971.9	HSPA8	-0.0674603	0.164219
ENSG00000166928.6	MS4A14	-0.216713	0.164933
ENSG00000129493.10	HEATR5A	0.156206	0.165009
ENSG00000148925.6	BTBD10	0.110972	0.165023
ENSG00000085872.10	CHERP	-0.0976106	0.165278
ENSG00000157045.4	NTAN1	-0.136882	0.165278
ENSG00000214389.2	RPS3AP26	-0.232329	0.165527
ENSG00000232457.3	SLC16A6P1	0.2757	0.165638
ENSG00000132819.12	RBM38	-0.103081	0.165696
ENSG00000179094.9	PER1	-0.130999	0.165696
ENSG00000165660.7	FAM175B	-0.0978002	0.165696
ENSG00000137831.10	UACA	0.154085	0.165696
ENSG00000121764.7	HCRTR1	-0.38932	0.165891
ENSG00000119878.5	CRIPT	0.157378	0.165891
ENSG00000256316.1	HIST1H3F	0.107616	0.166274
ENSG00000033030.9	ZCCHC8	0.0923525	0.166364
ENSG00000228816.1	AK3P5	-0.48736	0.166536
ENSG00000214954.4	LRRC69	0.183747	0.166826
ENSG00000129317.10	PUS7L	0.126025	0.167351
ENSG00000115239.17	GPR75-ASB3	0.248674	0.167514
ENSG00000012983.7	MAP4K5	0.0960889	0.167548
ENSG00000137207.7	YIPF3	-0.114935	0.167548
ENSG00000132507.13	EIF5A	-0.0879578	0.167548
ENSG00000228340.1	RP5-1043L13.1	-0.129616	0.167548
ENSG00000088035.11	ALG6	0.108754	0.167918
ENSG00000090263.11	MRPS33	0.114399	0.167918
ENSG00000138764.9	CCNG2	-0.140333	0.168068
ENSG00000173456.4	RNF26	-0.09409	0.169089
ENSG00000196235.9	SUPT5H	-0.0871195	0.169158
ENSG00000164362.14	TERT	-0.16426	0.169211
ENSG00000110628.9	SLC22A18	-0.167464	0.169223
ENSG00000111907.16	TPD52L1	-0.41998	0.16944
ENSG00000217930.3	PAM16	0.15273	0.169478
ENSG00000112561.13	TFEB	0.160585	0.169782
ENSG00000034510.4	TMSB10	-0.0845289	0.169931
ENSG00000177879.10	AP3S1	0.112689	0.169931
ENSG00000104970.6	KIR3DX1	-0.185166	0.170136
ENSG00000007171.12	NOS2	-0.411769	0.170136
ENSG00000180488.10	FAM73A	0.158518	0.170136
ENSG00000172766.14	NAA16	0.147367	0.170136
ENSG00000170264.8	FAM161A	0.162068	0.170136
ENSG00000103811.11	CTSH	-0.136487	0.170136
ENSG00000196693.10	ZNF33B	0.148951	0.170136
ENSG00000135842.12	FAM129A	-0.149537	0.170136
ENSG00000178585.10	CTNNBIP1	-0.135112	0.170136
ENSG00000273302.1	RP11-493E12.2	0.364656	0.170136
ENSG00000111911.5	HINT3	0.156239	0.170676
ENSG00000147421.13	HMBOX1	-0.0736808	0.170676
ENSG00000151665.8	PIGF	0.129525	0.170676
ENSG00000109736.10	MFSD10	0.0843258	0.170676
ENSG00000077463.10	SIRT6	-0.104181	0.170676
ENSG00000185043.6	CIB1	0.109044	0.170792
ENSG00000128534.3	NAA38	0.0943713	0.170792
ENSG00000135407.6	AVIL	-0.214467	0.171177
ENSG00000184988.4	TMEM106A	-0.141551	0.171592
ENSG00000176842.10	IRX5	-0.123368	0.17162
ENSG00000150768.11	DLAT	0.0782115	0.17164
ENSG00000159445.8	THEM4	0.115918	0.17193
ENSG00000028116.12	VRK2	0.124643	0.172802
ENSG00000087365.10	SF3B2	-0.0819456	0.172935
ENSG00000151065.9	DCP1B	-0.119677	0.173152
ENSG00000135624.11	CCT7	-0.0644203	0.173698
ENSG00000272477.1	RP11-158G18.1	0.21039	0.174472
ENSG00000129351.13	ILF3	-0.0678242	0.174775
ENSG00000153395.5	LPCAT1	0.0649923	0.174779
ENSG00000117528.7	ABCD3	0.0967387	0.174907
ENSG00000165521.11	EML5	0.188526	0.174907
ENSG00000166266.9	CUL5	0.116302	0.17495
ENSG00000160007.13	ARHGAP35	-0.0592396	0.174966
ENSG00000131653.8	TRAF7	-0.0864737	0.17501
ENSG00000136379.7	ABHD17C	-0.251394	0.175275
ENSG00000137409.14	MTCH1	-0.0723048	0.176793
ENSG00000108861.4	DUSP3	-0.0632112	0.17723
ENSG00000155100.6	OTUD6B	0.105288	0.17723
ENSG00000124145.5	SDC4	-0.306054	0.177497
ENSG00000267242.1	AC069278.4	-0.272845	0.177497
ENSG00000100242.11	SUN2	-0.0945106	0.178059
ENSG00000087269.11	NOP14	-0.0726415	0.178059
ENSG00000072756.12	TRNT1	0.0937516	0.178059
ENSG00000162881.5	OXER1	-0.448716	0.178059
ENSG00000136869.13	TLR4	0.141045	0.178198
ENSG00000135736.5	CCDC102A	-0.177594	0.178332
ENSG00000183688.4	FAM101B	0.0649264	0.178332
ENSG00000141933.8	TPGS1	-0.138647	0.17855
ENSG00000114544.11	SLC41A3	-0.0935765	0.17855
ENSG00000196547.10	MAN2A2	-0.0905119	0.17855
ENSG00000232931.1	LINC00342	0.136709	0.179138
ENSG00000117335.14	CD46	0.086456	0.179138
ENSG00000137710.10	RDX	0.112015	0.179213
ENSG00000163683.7	SMIM14	-0.187902	0.179696
ENSG00000197020.6	ZNF100	0.106377	0.179696
ENSG00000131375.5	CAPN7	0.0951844	0.180465
ENSG00000170906.11	NDUFA3	0.117641	0.180775
ENSG00000259583.1	RP11-66B24.4	0.284433	0.181201
ENSG00000151208.12	DLG5	-0.164675	0.18121
ENSG00000114857.13	NKTR	0.0822419	0.181333
ENSG00000211460.7	TSN	0.080056	0.182461
ENSG00000141013.10	GAS8	-0.180519	0.182567
ENSG00000163378.9	EOGT	0.131599	0.182632
ENSG00000188206.5	HNRNPU-AS1	0.0860891	0.182647
ENSG00000175198.10	PCCA	0.11317	0.182818
ENSG00000124535.11	WRNIP1	-0.0816261	0.182898
ENSG00000100941.4	PNN	0.0656505	0.182898
ENSG00000080819.2	CPOX	-0.0876614	0.182898
ENSG00000122884.8	P4HA1	0.0959895	0.183326
ENSG00000111696.7	NT5DC3	0.0955743	0.183549
ENSG00000177181.10	RIMKLA	0.1624	0.183549
ENSG00000198018.6	ENTPD7	0.12715	0.183549
ENSG00000218596.2	RP11-2J18.1	0.374818	0.183805
ENSG00000105556.6	MIER2	-0.117098	0.183857
ENSG00000179837.6	RBM15B	-0.0868593	0.184122
ENSG00000172954.9	LCLAT1	0.114222	0.184122
ENSG00000135018.9	UBQLN1	-0.0716361	0.184283
ENSG00000154059.5	IMPACT	0.0971848	0.184283
ENSG00000117500.8	TMED5	0.100126	0.184406
ENSG00000080947.10	CROCCP3	-0.24457	0.184543
ENSG00000236552.1	RPL13AP5	-0.130774	0.184657
ENSG00000170412.12	GPRC5C	0.325162	0.184801
ENSG00000138867.12	GUCD1	-0.0770954	0.184801
ENSG00000251706.1	RNU7-61P	0.197377	0.184801
ENSG00000181450.13	ZNF678	0.111471	0.184801
ENSG00000143321.14	HDGF	-0.0610929	0.185338
ENSG00000184164.10	CRELD2	-0.0989088	0.185713
ENSG00000069011.11	PITX1	-0.0878398	0.185992
ENSG00000198825.7	INPP5F	-0.0947291	0.186017
ENSG00000186106.7	ANKRD46	0.119931	0.186067
ENSG00000124181.10	PLCG1	-0.103818	0.186067
ENSG00000092199.13	HNRNPC	-0.0592477	0.18616
ENSG00000185127.5	C6orf120	0.0904955	0.186783
ENSG00000173545.4	ZNF622	-0.0926765	0.186783
ENSG00000135596.13	MICAL1	-0.0855781	0.186783
ENSG00000204344.10	STK19	0.184188	0.186969
ENSG00000164620.4	RELL2	-0.101471	0.186972
ENSG00000005436.9	GCFC2	0.136642	0.186985
ENSG00000067182.3	TNFRSF1A	-0.0697382	0.187024
ENSG00000233340.1	RP11-25C19.3	0.34349	0.187024
ENSG00000151466.7	SCLT1	0.108727	0.187043
ENSG00000137076.14	TLN1	-0.0757121	0.18719
ENSG00000129824.11	RPS4Y1	-0.08875	0.187202
ENSG00000160917.10	CPSF4	-0.0916558	0.187252
ENSG00000212128.2	TAS2R13	0.394633	0.187252
ENSG00000150510.11	FAM124A	-0.377275	0.187252
ENSG00000164211.8	STARD4	0.148317	0.187614
ENSG00000170584.6	NUDCD2	0.108843	0.187614
ENSG00000104976.7	SNAPC2	-0.12083	0.187669
ENSG00000103540.12	CCP110	0.11276	0.187697
ENSG00000207133.1	SNORD116-7	-0.23782	0.187697
ENSG00000175550.3	DRAP1	-0.101111	0.187711
ENSG00000256188.1	TAS2R30	0.283048	0.18793
ENSG00000179611.2	DGKZP1	-0.328377	0.18793
ENSG00000168961.12	LGALS9	-0.0835305	0.188303
ENSG00000140320.7	BAHD1	-0.0773657	0.188303
ENSG00000111481.5	COPZ1	0.0719009	0.188661
ENSG00000267871.1	CTC-444N24.6	0.294911	0.188749
ENSG00000232372.1	RP11-504P24.2	0.361212	0.188749
ENSG00000143164.11	DCAF6	0.075547	0.188749
ENSG00000169239.8	CA5B	-0.151444	0.188749
ENSG00000125741.4	OPA3	-0.0740238	0.188749
ENSG00000124635.7	HIST1H2BJ	0.249301	0.189612
ENSG00000177888.7	ZBTB41	0.144015	0.189612
ENSG00000124659.5	TBCC	-0.115363	0.18963
ENSG00000112701.13	SENP6	0.0976449	0.18963
ENSG00000272093.1	CTC-365E16.1	0.193277	0.189726
ENSG00000100129.13	EIF3L	-0.0805735	0.189733
ENSG00000151687.10	ANKAR	0.172427	0.189733
ENSG00000143353.7	LYPLAL1	0.147465	0.190005
ENSG00000184428.8	TOP1MT	-0.0906614	0.190197
ENSG00000081377.12	CDC14B	-0.360758	0.190305
ENSG00000243927.1	MRPS6	0.0950791	0.190364
ENSG00000154727.6	GABPA	0.114941	0.190593
ENSG00000119408.12	NEK6	-0.0718797	0.190635
ENSG00000149930.13	TAOK2	-0.071902	0.190696
ENSG00000106692.9	FKTN	0.110827	0.190838
ENSG00000146858.7	ZC3HAV1L	0.141233	0.190842
ENSG00000107130.6	NCS1	-0.0830861	0.190842
ENSG00000213976.3	CTD-2561J22.2	0.195701	0.191024
ENSG00000113749.5	HRH2	-0.0907086	0.191024
ENSG00000273183.1	RP11-5C23.2	0.398962	0.191024
ENSG00000145685.9	LHFPL2	0.170535	0.191118
ENSG00000137073.16	UBAP2	-0.0717273	0.191291
ENSG00000134375.6	TIMM17A	0.0810128	0.191345
ENSG00000230806.1	RP11-343N15.1	-0.413241	0.191345
ENSG00000101057.11	MYBL2	-0.0760452	0.191357
ENSG00000128394.12	APOBEC3F	-0.301191	0.191385
ENSG00000197182.8	FLJ27365	0.143417	0.191596
ENSG00000162694.9	EXTL2	0.12649	0.191596
ENSG00000156239.7	N6AMT1	0.181217	0.192
ENSG00000089737.11	DDX24	-0.068577	0.192004
ENSG00000100815.8	TRIP11	0.105978	0.192004
ENSG00000156471.8	PTDSS1	-0.0585301	0.192048
ENSG00000031823.10	RANBP3	-0.0779398	0.192048
ENSG00000171720.5	HDAC3	-0.078776	0.193029
ENSG00000141401.7	IMPA2	-0.0837099	0.193029
ENSG00000100462.11	PRMT5	-0.0884314	0.193029
ENSG00000114204.10	SERPINI2	0.177458	0.193111
ENSG00000116005.7	PCYOX1	0.0910743	0.193201
ENSG00000165458.9	INPPL1	-0.0881067	0.193217
ENSG00000248019.2	FAM13A-AS1	0.207239	0.193422
ENSG00000100316.11	RPL3	-0.0743122	0.193827
ENSG00000185621.7	LMLN	0.109066	0.193989
ENSG00000133858.11	ZFC3H1	0.0818636	0.193989
ENSG00000245146.2	LINC01024	0.407734	0.193989
ENSG00000117713.13	ARID1A	-0.0663098	0.194127
ENSG00000184900.11	SUMO3	-0.0769393	0.194523
ENSG00000161955.12	TNFSF13	-0.148081	0.195052
ENSG00000157741.10	UBN2	0.0829035	0.195052
ENSG00000103642.7	LACTB	0.144498	0.195052
ENSG00000263327.2	TAPT1-AS1	-0.220194	0.195282
ENSG00000169221.9	TBC1D10B	-0.0853075	0.195282
ENSG00000181830.7	SLC35C1	-0.0955369	0.195282
ENSG00000174485.10	DENND4A	0.0841324	0.195282
ENSG00000153558.9	FBXL2	0.135678	0.195483
ENSG00000196502.7	SULT1A1	-0.124475	0.195483
ENSG00000153214.5	TMEM87B	0.102151	0.195483
ENSG00000127603.19	MACF1	0.0567628	0.195515
ENSG00000172992.7	DCAKD	-0.0959883	0.195515
ENSG00000106560.6	GIMAP2	-0.132054	0.19561
ENSG00000131067.12	GGT7	-0.143796	0.196174
ENSG00000167555.9	ZNF528	0.165602	0.196804
ENSG00000134852.10	CLOCK	0.082123	0.197063
ENSG00000162959.9	MEMO1	0.158165	0.197063
ENSG00000136521.8	NDUFB5	0.0917932	0.197119
ENSG00000261512.2	RP11-46D6.1	-0.314013	0.19713
ENSG00000116514.12	RNF19B	-0.117857	0.197681
ENSG00000245248.3	USP2-AS1	-0.297858	0.197725
ENSG00000184277.8	TM2D3	0.132995	0.197725
ENSG00000198160.10	MIER1	0.105338	0.197731
ENSG00000130382.7	MLLT1	-0.092625	0.197731
ENSG00000103152.7	MPG	-0.102901	0.197731
ENSG00000079313.7	REXO1	-0.0936084	0.198089
ENSG00000171302.12	CANT1	-0.0734707	0.198095
ENSG00000128567.12	PODXL	0.120945	0.198188
ENSG00000076924.7	XAB2	-0.0891464	0.198404
ENSG00000075218.14	GTSE1	-0.0838295	0.198404
ENSG00000085274.11	MYNN	0.106502	0.198479
ENSG00000198785.4	GRIN3A	0.237351	0.198549
ENSG00000123219.8	CENPK	0.0920225	0.198549
ENSG00000233306.2	TRGV2	-0.405761	0.198657
ENSG00000136783.9	NIPSNAP3A	0.0851629	0.198819
ENSG00000118363.7	SPCS2	0.0963549	0.199707
ENSG00000173209.18	AHSA2	0.0814828	0.199707
ENSG00000185261.9	KIAA0825	0.179133	0.199707
ENSG00000262902.1	RP11-750B16.1	0.258182	0.199904
ENSG00000132530.12	XAF1	-0.101623	0.200305
ENSG00000104805.11	NUCB1	-0.0917137	0.200894
ENSG00000178035.7	IMPDH2	-0.0707505	0.201108
ENSG00000141371.8	C17orf64	-0.27395	0.201108
ENSG00000072501.13	SMC1A	-0.0658763	0.201108
ENSG00000250027.1	RP11-563E2.2	0.436796	0.201108
ENSG00000100813.10	ACIN1	-0.0652134	0.201108
ENSG00000168298.4	HIST1H1E	0.0984414	0.201108
ENSG00000165730.10	STOX1	0.342643	0.201108
ENSG00000185633.6	NDUFA4L2	-0.229876	0.201108
ENSG00000103126.10	AXIN1	-0.0930792	0.201108
ENSG00000137054.11	POLR1E	-0.0810387	0.201221
ENSG00000261221.1	ZNF865	-0.0887723	0.201248
ENSG00000123870.9	ZNF137P	0.203488	0.201515
ENSG00000228409.1	CCT6P1	0.126904	0.201555
ENSG00000258790.1	KIAA0391	0.372016	0.201767
ENSG00000099917.13	MED15	-0.0890182	0.201893
ENSG00000105655.14	ISYNA1	0.219147	0.202203
ENSG00000138814.12	PPP3CA	0.0885645	0.20332
ENSG00000148248.9	SURF4	-0.0620079	0.20332
ENSG00000172660.7	TAF15	-0.0742801	0.203458
ENSG00000175489.9	LRRC25	0.194336	0.203844
ENSG00000218283.2	MORF4L1P1	-0.15001	0.203844
ENSG00000119638.8	NEK9	-0.0632374	0.203844
ENSG00000161326.8	DUSP14	-0.147808	0.20414
ENSG00000152558.10	TMEM123	0.0930337	0.20414
ENSG00000132485.8	ZRANB2	0.0970039	0.204165
ENSG00000166289.5	PLEKHF1	-0.149369	0.20459
ENSG00000097033.10	SH3GLB1	0.0985474	0.204842
ENSG00000268518.1	CTD-2545M3.8	-0.202261	0.204979
ENSG00000178295.10	GEN1	0.0987058	0.204979
ENSG00000156876.8	SASS6	0.102057	0.205026
ENSG00000143498.13	TAF1A	0.201279	0.205026
ENSG00000178301.3	AQP11	0.152474	0.205026
ENSG00000211692.1	TRGJP1	0.159024	0.205026
ENSG00000161570.4	CCL5	-0.165269	0.205026
[truncated: 13,057 more rows]

## Sheet: C16 KO vs NT
Feature	Feature_gene_name	log2FoldChange	padj
ENSG00000163584.13	RPL22L1	2.73006	0
ENSG00000124762.9	CDKN1A	-0.874008	8.61238e-77
ENSG00000152104.7	PTPN14	-0.676951	2.10137e-67
ENSG00000132274.11	TRIM22	-0.597451	4.51562e-60
ENSG00000120278.10	PLEKHG1	-1.56588	7.71391e-58
ENSG00000172667.6	ZMAT3	-0.717316	7.10928e-56
ENSG00000133048.8	CHI3L1	0.847602	2.46751e-44
ENSG00000055163.14	CYFIP2	-0.802009	2.98798e-43
ENSG00000125726.6	CD70	-0.788294	1.42144e-42
ENSG00000133055.4	MYBPH	0.888691	1.1691e-40
ENSG00000131080.10	EDA2R	-0.712011	5.66968e-38
ENSG00000196890.3	HIST3H2BB	0.858964	2.89497e-37
ENSG00000135679.17	MDM2	-0.536719	6.41206e-36
ENSG00000120889.8	TNFRSF10B	-0.4854	1.99071e-34
ENSG00000091490.6	SEL1L3	0.513434	8.42725e-34
ENSG00000116991.6	SIPA1L2	-0.608082	1.54972e-27
ENSG00000150471.11	LPHN3	-0.50438	2.49271e-27
ENSG00000164938.9	TP53INP1	-0.536293	2.38532e-26
ENSG00000125740.9	FOSB	1.21807	2.60267e-26
ENSG00000005108.11	THSD7A	-0.499372	1.28219e-25
ENSG00000250337.1	LINC01021	-0.613098	2.35182e-25
ENSG00000168685.10	IL7R	-0.582278	3.18526e-24
ENSG00000116717.7	GADD45A	-0.784355	6.98611e-24
ENSG00000119042.12	SATB2	0.409091	1.5221e-23
ENSG00000004468.8	CD38	0.876376	2.44792e-23
ENSG00000170345.5	FOS	0.667632	2.74741e-23
ENSG00000173530.5	TNFRSF10D	-0.478762	2.87738e-23
ENSG00000173546.7	CSPG4	-0.537047	3.38627e-23
ENSG00000158258.11	CLSTN2	-0.474547	1.90783e-22
ENSG00000128322.6	IGLL1	0.773808	3.1227e-22
ENSG00000009950.11	MLXIPL	1.20719	3.0461e-21
ENSG00000145632.10	PLK2	-0.509768	4.02184e-21
ENSG00000161513.7	FDXR	-0.453346	5.40879e-21
ENSG00000048392.7	RRM2B	-0.451292	1.59664e-20
ENSG00000100298.11	APOBEC3H	-0.844399	1.77602e-20
ENSG00000178718.5	RPP25	0.575162	6.13668e-20
ENSG00000142583.13	SLC2A5	0.650798	6.24473e-20
ENSG00000152784.11	PRDM8	-0.52132	6.51157e-20
ENSG00000227706.3	RP11-301G19.1	0.417363	9.13128e-20
ENSG00000134574.7	DDB2	-0.388897	1.28727e-19
ENSG00000185432.10	METTL7A	-0.487459	3.19227e-19
ENSG00000107863.12	ARHGAP21	0.569351	3.62575e-19
ENSG00000122641.9	INHBA	-0.395596	3.02353e-18
ENSG00000168405.10	CMAHP	-0.678714	8.95003e-18
ENSG00000130396.16	MLLT4	-0.314348	1.1638e-17
ENSG00000228682.2	RP11-439L8.3	-0.655409	2.39091e-17
ENSG00000125657.3	TNFSF9	-0.447019	2.39091e-17
ENSG00000135749.14	PCNXL2	-0.739448	2.77936e-17
ENSG00000017483.10	SLC38A5	0.396791	3.82307e-17
ENSG00000163297.12	ANTXR2	-0.387616	1.39362e-16
ENSG00000137265.10	IRF4	0.514259	1.53632e-16
ENSG00000093072.11	CECR1	-0.526836	2.17182e-16
ENSG00000164796.13	CSMD3	-0.376872	2.37412e-16
ENSG00000073111.9	MCM2	0.37195	6.69497e-16
ENSG00000249437.3	NAIP	-0.501655	6.74785e-16
ENSG00000223907.1	RP11-439L8.4	-0.668853	1.07684e-15
ENSG00000180530.5	NRIP1	0.327888	1.46783e-15
ENSG00000076248.6	UNG	0.359594	1.58008e-15
ENSG00000163947.7	ARHGEF3	-0.376431	2.87597e-15
ENSG00000112759.12	SLC29A1	0.406878	3.93822e-15
ENSG00000164045.7	CDC25A	0.346468	4.23464e-15
ENSG00000114107.4	CEP70	-0.398495	8.96419e-15
ENSG00000170627.5	GTSF1	0.652421	1.72136e-14
ENSG00000183688.4	FAM101B	0.286317	1.76943e-14
ENSG00000116701.10	NCF2	-0.445826	3.20761e-14
ENSG00000171469.6	ZNF561	-0.3501	3.45835e-14
ENSG00000145386.5	CCNA2	0.353691	5.87448e-14
ENSG00000104055.10	TGM5	-0.353431	8.67606e-14
ENSG00000127824.9	TUBA4A	0.370847	1.08221e-13
ENSG00000111445.9	RFC5	0.342431	1.87603e-13
ENSG00000131401.7	NAPSB	0.473245	1.9022e-13
ENSG00000138028.10	CGREF1	0.36321	2.33277e-13
ENSG00000076003.4	MCM6	0.30392	3.74277e-13
ENSG00000172716.12	SLFN11	0.611934	7.72069e-13
ENSG00000112697.11	TMEM30A	-0.32443	8.62976e-13
ENSG00000080822.12	CLDND1	-0.419883	9.14503e-13
ENSG00000099998.13	GGT5	-0.616197	9.14503e-13
ENSG00000233038.1	AC011899.9	0.536708	9.69978e-13
ENSG00000228340.1	RP5-1043L13.1	-0.433248	9.7261e-13
ENSG00000085840.8	ORC1	0.307693	1.02233e-12
ENSG00000158473.6	CD1D	0.82087	1.04377e-12
ENSG00000101057.11	MYBL2	0.358538	1.08393e-12
ENSG00000166927.8	MS4A7	-0.382097	1.17852e-12
ENSG00000070081.11	NUCB2	0.301767	1.3764e-12
ENSG00000136010.9	ALDH1L2	0.442232	2.29933e-12
ENSG00000022267.12	FHL1	-0.511965	2.72405e-12
ENSG00000067798.9	NAV3	-0.277918	3.42697e-12
ENSG00000105327.11	BBC3	-0.475217	3.42697e-12
ENSG00000131153.4	GINS2	0.348278	3.77833e-12
ENSG00000104738.12	MCM4	0.268354	3.81921e-12
ENSG00000082074.11	FYB	-0.33864	5.18155e-12
ENSG00000186193.7	SAPCD2	0.367581	5.18328e-12
ENSG00000159388.5	BTG2	-0.414126	6.88823e-12
ENSG00000065328.12	MCM10	0.293086	7.48263e-12
ENSG00000117399.9	CDC20	0.313346	1.06065e-11
ENSG00000183621.11	ZNF438	-0.273401	1.50745e-11
ENSG00000007237.14	GAS7	-0.520956	1.54263e-11
ENSG00000110400.6	PVRL1	0.39402	1.55819e-11
ENSG00000137875.4	BCL2L10	0.598792	1.55819e-11
ENSG00000065809.9	FAM107B	0.31083	1.61026e-11
ENSG00000196460.8	RFX8	-0.356743	1.88232e-11
ENSG00000136938.8	ANP32B	0.288328	1.91814e-11
ENSG00000112118.13	MCM3	0.279164	2.28635e-11
ENSG00000152582.8	SPEF2	-0.405087	2.92028e-11
ENSG00000099725.10	PRKY	-0.360951	3.13041e-11
ENSG00000148773.8	MKI67	0.248606	3.37569e-11
ENSG00000158220.9	ESYT3	-0.570561	3.37569e-11
ENSG00000174307.5	PHLDA3	-0.427586	4.31215e-11
ENSG00000079616.8	KIF22	0.275358	4.59247e-11
ENSG00000145428.10	RNF175	-0.487121	4.59247e-11
ENSG00000088325.11	TPX2	0.286333	4.70952e-11
ENSG00000109906.9	ZBTB16	0.641392	6.62533e-11
ENSG00000181218.4	HIST3H2A	0.604601	6.74935e-11
ENSG00000168242.3	HIST1H2BI	0.430498	8.53254e-11
ENSG00000188529.10	SRSF10	0.278294	9.76471e-11
ENSG00000068831.14	RASGRP2	0.276333	9.78795e-11
ENSG00000234546.2	RP3-510D11.2	-1.06963	1.08356e-10
ENSG00000173559.8	NABP1	-0.355288	1.1129e-10
ENSG00000087460.19	GNAS	0.281109	1.14295e-10
ENSG00000206560.6	ANKRD28	-0.263637	1.23577e-10
ENSG00000169919.12	GUSB	0.281948	1.56372e-10
ENSG00000143476.13	DTL	0.283923	1.56372e-10
ENSG00000130294.10	KIF1A	-1.09194	1.56372e-10
ENSG00000112249.9	ASCC3	-0.244811	1.75929e-10
ENSG00000134057.10	CCNB1	0.328559	1.75929e-10
ENSG00000154767.10	XPC	-0.28169	1.76282e-10
ENSG00000051108.10	HERPUD1	0.285158	1.78037e-10
ENSG00000178999.8	AURKB	0.316398	1.88649e-10
ENSG00000162104.5	ADCY9	-0.270953	1.92759e-10
ENSG00000161888.7	SPC24	0.319379	1.97034e-10
ENSG00000197409.6	HIST1H3D	0.378893	2.36269e-10
ENSG00000161681.11	SHANK1	-0.337922	2.93393e-10
ENSG00000115163.10	CENPA	0.32824	3.43929e-10
ENSG00000071539.9	TRIP13	0.314541	3.43929e-10
ENSG00000144677.10	CTDSPL	0.775436	3.51347e-10
ENSG00000069493.10	CLEC2D	-0.38245	3.91781e-10
ENSG00000080546.9	SESN1	-0.427491	3.99743e-10
ENSG00000148680.11	HTR7	-0.412612	4.48856e-10
ENSG00000144283.17	PKP4	0.262229	4.48856e-10
ENSG00000197506.6	SLC28A3	-0.391707	4.59362e-10
ENSG00000113494.12	PRLR	-0.75301	5.24333e-10
ENSG00000166508.13	MCM7	0.290084	5.4321e-10
ENSG00000075618.13	FSCN1	-0.468347	7.00192e-10
ENSG00000128408.7	RIBC2	0.862922	7.02271e-10
ENSG00000130766.4	SESN2	-0.483251	7.56496e-10
ENSG00000152818.14	UTRN	-0.242765	7.85916e-10
ENSG00000184156.11	KCNQ3	-0.538491	7.92061e-10
ENSG00000109084.9	TMEM97	0.286355	7.92821e-10
ENSG00000095970.12	TREM2	-0.543734	7.94139e-10
ENSG00000197122.7	SRC	-0.497905	7.95e-10
ENSG00000117411.12	B4GALT2	0.343648	8.8592e-10
ENSG00000157500.6	APPL1	0.281031	9.34361e-10
ENSG00000115165.5	CYTIP	-0.397242	9.47291e-10
ENSG00000058804.10	NDC1	0.302047	9.82009e-10
ENSG00000166851.10	PLK1	0.294826	1.00267e-09
ENSG00000149554.8	CHEK1	0.301811	1.08062e-09
ENSG00000213462.4	ERV3-1	-0.27416	1.09405e-09
ENSG00000029993.10	HMGB3	0.267686	1.1791e-09
ENSG00000106785.10	TRIM14	0.298725	1.1852e-09
ENSG00000071054.11	MAP4K4	-0.223329	1.26379e-09
ENSG00000119333.7	WDR34	0.336019	1.26379e-09
ENSG00000110108.5	TMEM109	0.328606	1.32359e-09
ENSG00000012048.15	BRCA1	0.221854	1.34645e-09
ENSG00000204131.6	NHSL2	-0.598812	1.4134e-09
ENSG00000061337.11	LZTS1	-0.390404	1.41778e-09
ENSG00000094804.5	CDC6	0.277143	1.79961e-09
ENSG00000185518.7	SV2B	-0.537089	1.79961e-09
ENSG00000171848.9	RRM2	0.243051	1.82874e-09
ENSG00000203814.5	HIST2H2BF	0.379376	1.85068e-09
ENSG00000137804.8	NUSAP1	0.281503	1.88879e-09
ENSG00000141314.8	RHBDL3	0.783669	2.06346e-09
ENSG00000130520.6	LSM4	0.27276	2.12818e-09
ENSG00000014257.11	ACPP	0.305443	2.22947e-09
ENSG00000198561.8	CTNND1	-0.338506	2.27878e-09
ENSG00000135476.7	ESPL1	0.254112	2.30948e-09
ENSG00000152926.10	ZNF117	-0.327455	2.37736e-09
ENSG00000186998.11	EMID1	-0.416874	2.41333e-09
ENSG00000077684.11	PHF17	0.276794	2.51652e-09
ENSG00000103522.11	IL21R	-0.546542	2.58363e-09
ENSG00000049541.6	RFC2	0.296646	3.03577e-09
ENSG00000077152.5	UBE2T	0.374986	3.03577e-09
ENSG00000158104.7	HPD	0.433555	3.27578e-09
ENSG00000186603.4	HPDL	0.351763	3.49682e-09
ENSG00000070882.8	OSBPL3	-0.502102	3.53747e-09
ENSG00000100297.11	MCM5	0.296766	3.57782e-09
ENSG00000111665.7	CDCA3	0.312898	3.76867e-09
ENSG00000088812.13	ATRN	-0.20231	4.05045e-09
ENSG00000149418.6	ST14	0.363498	4.19015e-09
ENSG00000148180.12	GSN	-0.312225	4.21989e-09
ENSG00000131127.9	ZNF141	0.388052	4.24361e-09
ENSG00000030419.12	IKZF2	-0.549024	4.70517e-09
ENSG00000079277.15	MKNK1	-0.247775	4.94357e-09
ENSG00000145604.11	SKP2	0.250884	5.32905e-09
ENSG00000069482.6	GAL	0.428774	5.32905e-09
ENSG00000090861.11	AARS	0.274039	5.85398e-09
ENSG00000076554.11	TPD52	0.387834	6.33264e-09
ENSG00000157557.7	ETS2	0.220579	6.8481e-09
ENSG00000171502.10	COL24A1	-0.315038	7.10525e-09
ENSG00000162063.8	CCNF	0.265554	7.10993e-09
ENSG00000111206.8	FOXM1	0.256781	7.12693e-09
ENSG00000157456.3	CCNB2	0.272885	7.18171e-09
ENSG00000089685.10	BIRC5	0.328831	7.82794e-09
ENSG00000134690.6	CDCA8	0.287766	9.05235e-09
ENSG00000136960.8	ENPP2	0.332591	9.19215e-09
ENSG00000140534.9	TICRR	0.253464	9.78896e-09
ENSG00000100433.11	KCNK10	-0.291466	1.01303e-08
ENSG00000051180.12	RAD51	0.304036	1.06096e-08
ENSG00000064393.11	HIPK2	-0.388687	1.08435e-08
ENSG00000100526.15	CDKN3	0.374104	1.14085e-08
ENSG00000088854.11	C20orf194	-0.242919	1.19447e-08
ENSG00000076864.15	RAP1GAP	-0.480369	1.29238e-08
ENSG00000130309.6	COLGALT1	0.251566	1.30354e-08
ENSG00000100162.10	CENPM	0.302632	1.41676e-08
ENSG00000187008.2	PKD1L3	-0.487027	1.53611e-08
ENSG00000155849.11	ELMO1	-0.2377	1.54636e-08
ENSG00000111371.11	SLC38A1	0.323129	1.57222e-08
ENSG00000176490.4	DIRAS1	-0.401867	1.59632e-08
ENSG00000119547.5	ONECUT2	-0.267419	1.67208e-08
ENSG00000196415.5	PRTN3	0.302446	1.67998e-08
ENSG00000167670.11	CHAF1A	0.258039	1.7098e-08
ENSG00000179218.9	CALR	0.233759	1.85389e-08
ENSG00000125885.9	MCM8	0.26777	1.94344e-08
ENSG00000140181.10	HERC2P2	-0.230273	1.94344e-08
ENSG00000101003.8	GINS1	0.312081	1.95407e-08
ENSG00000123975.4	CKS2	0.302512	2.03713e-08
ENSG00000179639.6	FCER1A	-0.725176	2.24176e-08
ENSG00000076356.6	PLXNA2	-0.767204	2.24176e-08
ENSG00000197697.3	HIST1H2BE	0.335568	2.27086e-08
ENSG00000173207.8	CKS1B	0.303005	2.36602e-08
ENSG00000106628.6	POLD2	0.271118	2.38114e-08
ENSG00000250479.4	CHCHD10	0.447097	2.41611e-08
ENSG00000167900.7	TK1	0.301462	2.43939e-08
ENSG00000131018.18	SYNE1	-0.41467	2.47023e-08
ENSG00000156970.8	BUB1B	0.244039	2.49236e-08
ENSG00000184661.9	CDCA2	0.248676	2.79632e-08
ENSG00000118971.3	CCND2	-0.229585	2.92648e-08
ENSG00000148229.8	POLE3	0.285869	3.03717e-08
ENSG00000168298.4	HIST1H1E	0.327832	3.04341e-08
ENSG00000124496.8	TRERF1	-0.250862	3.26949e-08
ENSG00000161981.6	SNRNP25	0.278126	3.28906e-08
ENSG00000142945.8	KIF2C	0.241139	3.28906e-08
ENSG00000105011.4	ASF1B	0.274725	3.47926e-08
ENSG00000099901.12	RANBP1	0.242792	3.67646e-08
ENSG00000169508.6	GPR183	-0.401836	3.684e-08
ENSG00000106804.6	C5	-0.26904	3.80907e-08
ENSG00000173848.14	NET1	0.291985	3.91656e-08
ENSG00000183684.6	ALYREF	0.279183	4.14252e-08
ENSG00000196814.10	MVB12B	-0.294785	4.21093e-08
ENSG00000100731.11	PCNX	-0.238995	5.1673e-08
ENSG00000110328.5	GALNT18	0.687216	5.28493e-08
ENSG00000135451.8	TROAP	0.252604	5.48611e-08
ENSG00000183527.7	PSMG1	0.369774	5.54879e-08
ENSG00000180549.7	FUT7	0.323529	5.95725e-08
ENSG00000198830.6	HMGN2	0.231728	6.05932e-08
ENSG00000013573.12	DDX11	0.224264	7.14411e-08
ENSG00000111602.7	TIMELESS	0.245006	7.26668e-08
ENSG00000124693.2	HIST1H3B	0.338031	7.41402e-08
ENSG00000166313.14	APBB1	0.461482	7.66949e-08
ENSG00000164626.8	KCNK5	0.40213	8.00959e-08
ENSG00000249353.2	NPM1P27	0.287584	8.02424e-08
ENSG00000112312.5	GMNN	0.321853	8.33102e-08
ENSG00000149218.4	ENDOD1	0.388461	8.55857e-08
ENSG00000249859.3	PVT1	-0.333447	9.84372e-08
ENSG00000185189.11	NRBP2	-0.315579	9.93048e-08
ENSG00000242732.3	RGAG4	-0.476104	1.02394e-07
ENSG00000092470.7	WDR76	0.259604	1.02394e-07
ENSG00000221968.4	FADS3	-0.439672	1.03869e-07
ENSG00000134684.6	YARS	0.241814	1.03869e-07
ENSG00000168393.8	DTYMK	0.259576	1.04896e-07
ENSG00000169403.7	PTAFR	-0.569557	1.08123e-07
ENSG00000144355.10	DLX1	-0.30613	1.10951e-07
ENSG00000169679.10	BUB1	0.238479	1.1618e-07
ENSG00000167513.4	CDT1	0.338732	1.18848e-07
ENSG00000123485.7	HJURP	0.234812	1.21517e-07
ENSG00000043355.6	ZIC2	0.480461	1.21517e-07
ENSG00000122952.12	ZWINT	0.255801	1.33704e-07
ENSG00000138180.11	CEP55	0.277039	1.36936e-07
ENSG00000132334.12	PTPRE	-0.251478	1.37203e-07
ENSG00000104889.4	RNASEH2A	0.28076	1.37203e-07
ENSG00000180071.14	ANKRD18A	-0.323826	1.47411e-07
ENSG00000197153.3	HIST1H3J	0.350615	1.4768e-07
ENSG00000073910.15	FRY	-0.20523	1.52594e-07
ENSG00000256229.3	ZNF486	0.671822	1.78436e-07
ENSG00000186185.9	KIF18B	0.242893	1.78444e-07
ENSG00000168496.3	FEN1	0.268169	1.82182e-07
ENSG00000204860.4	FAM201A	-0.354833	1.85054e-07
ENSG00000114439.14	BBX	-0.197587	1.93402e-07
ENSG00000221829.5	FANCG	0.256187	2.05276e-07
ENSG00000110881.7	ASIC1	-0.45337	2.11657e-07
ENSG00000167747.9	C19orf48	0.258098	2.13731e-07
ENSG00000139597.12	N4BP2L1	-0.272669	2.16441e-07
ENSG00000157445.10	CACNA2D3	0.455971	2.17091e-07
ENSG00000101236.12	RNF24	-0.207428	2.37933e-07
ENSG00000019144.12	PHLDB1	-0.382585	2.39234e-07
ENSG00000153395.5	LPCAT1	0.19802	2.42928e-07
ENSG00000106070.13	GRB10	0.305779	2.50285e-07
ENSG00000166928.6	MS4A14	-0.451239	2.50909e-07
ENSG00000174718.7	KIAA1551	-0.253422	2.70072e-07
ENSG00000131398.9	KCNC3	0.323249	2.72137e-07
ENSG00000065357.15	DGKA	-0.369313	2.73276e-07
ENSG00000111961.12	SASH1	-0.206125	2.7925e-07
ENSG00000197459.2	HIST1H2BH	0.358262	2.80122e-07
ENSG00000175063.12	UBE2C	0.255142	2.95436e-07
ENSG00000075426.7	FOSL2	-0.211129	3.08554e-07
ENSG00000170439.5	METTL7B	-0.529202	3.22631e-07
ENSG00000179820.11	MYADM	0.239331	3.22631e-07
ENSG00000167566.12	NCKAP5L	-0.311012	3.3128e-07
ENSG00000186918.9	ZNF395	0.3012	3.496e-07
ENSG00000196374.5	HIST1H2BM	0.343622	3.5132e-07
ENSG00000075399.8	VPS9D1	-0.32636	3.51614e-07
ENSG00000235865.2	GSN-AS1	-0.462462	3.51614e-07
ENSG00000078237.4	C12orf5	-0.339044	3.65091e-07
ENSG00000173890.12	GPR160	0.315761	3.76855e-07
ENSG00000035499.8	DEPDC1B	0.291678	3.81863e-07
ENSG00000155380.7	SLC16A1	0.22513	4.18454e-07
ENSG00000204128.5	C2orf72	-0.508617	4.35002e-07
ENSG00000136824.14	SMC2	0.237663	4.35002e-07
ENSG00000100350.10	FOXRED2	0.242238	4.35002e-07
ENSG00000146416.12	AIG1	1.22879	4.37015e-07
ENSG00000137563.7	GGH	0.354905	4.37015e-07
ENSG00000181026.13	AEN	-0.227301	4.37015e-07
ENSG00000143815.10	LBR	0.282585	4.37015e-07
ENSG00000196584.2	XRCC2	0.246219	4.40777e-07
ENSG00000175643.7	RMI2	0.313376	4.5006e-07
ENSG00000104921.10	FCER2	-0.636685	4.51667e-07
ENSG00000106355.5	LSM5	0.274856	4.6459e-07
ENSG00000099194.5	SCD	0.259079	4.70134e-07
ENSG00000187240.9	DYNC2H1	-0.440844	4.82585e-07
ENSG00000121152.5	NCAPH	0.222708	4.83314e-07
ENSG00000137462.6	TLR2	-0.213091	5.01101e-07
ENSG00000182611.3	HIST1H2AJ	0.331293	5.06371e-07
ENSG00000040275.12	SPDL1	0.242887	5.227e-07
ENSG00000114779.15	ABHD14B	0.233121	5.56033e-07
ENSG00000164104.7	HMGB2	0.251958	5.6672e-07
ENSG00000135778.7	NTPCR	-0.246659	5.73155e-07
ENSG00000197061.3	HIST1H4C	0.334523	5.93031e-07
ENSG00000068489.8	PRR11	0.233683	6.14908e-07
ENSG00000101945.12	SUV39H1	0.296606	6.16982e-07
ENSG00000173456.4	RNF26	0.270937	6.43351e-07
ENSG00000100714.11	MTHFD1	0.218723	6.66014e-07
ENSG00000184348.2	HIST1H2AK	0.391336	6.81965e-07
ENSG00000115457.5	IGFBP2	0.277613	6.92456e-07
ENSG00000125827.4	TMX4	0.241618	7.04386e-07
ENSG00000133812.10	SBF2	-0.292876	7.14255e-07
ENSG00000204392.6	LSM2	0.260664	7.2538e-07
ENSG00000139734.13	DIAPH3	0.261928	7.30775e-07
ENSG00000178921.9	PFAS	0.243414	7.38849e-07
ENSG00000198554.7	WDHD1	0.237157	7.48316e-07
ENSG00000160712.8	IL6R	0.184173	7.55042e-07
ENSG00000184357.3	HIST1H1B	0.301679	7.74218e-07
ENSG00000102977.9	ACD	0.292066	7.8242e-07
ENSG00000167325.10	RRM1	0.242842	7.83129e-07
ENSG00000256325.1	RP11-611O2.1	-0.769385	7.83129e-07
ENSG00000196187.7	TMEM63A	-0.260079	8.03287e-07
ENSG00000176533.8	GNG7	-0.319553	8.54669e-07
ENSG00000197535.10	MYO5A	-0.210937	9.27598e-07
ENSG00000143889.11	HNRNPLL	0.236924	9.49445e-07
ENSG00000225953.2	SATB2-AS1	0.533619	9.57124e-07
ENSG00000166483.6	WEE1	0.249455	9.57124e-07
ENSG00000112984.7	KIF20A	0.270813	1.01149e-06
ENSG00000168003.12	SLC3A2	0.243385	1.03529e-06
ENSG00000112715.16	VEGFA	0.350289	1.05682e-06
ENSG00000101188.4	NTSR1	-0.353051	1.07577e-06
ENSG00000131944.5	C19orf40	0.411504	1.09032e-06
ENSG00000182511.7	FES	-0.230573	1.09927e-06
ENSG00000104043.10	ATP8B4	-0.217649	1.1158e-06
ENSG00000165480.11	SKA3	0.281533	1.1158e-06
ENSG00000142230.7	SAE1	0.204134	1.12688e-06
ENSG00000127663.10	KDM4B	-0.248771	1.17005e-06
ENSG00000109323.4	MANBA	-0.244525	1.17392e-06
ENSG00000137259.2	HIST1H2AB	0.285194	1.18426e-06
ENSG00000119318.8	RAD23B	0.191861	1.21156e-06
ENSG00000159259.7	CHAF1B	0.278502	1.22801e-06
ENSG00000062822.8	POLD1	0.236727	1.22801e-06
ENSG00000114491.9	UMPS	0.23049	1.34394e-06
ENSG00000175048.12	ZDHHC14	-0.288541	1.3746e-06
ENSG00000005801.12	ZNF195	-0.224215	1.39872e-06
ENSG00000093009.5	CDC45	0.234911	1.40206e-06
ENSG00000111581.5	NUP107	0.228694	1.43372e-06
ENSG00000118655.4	DCLRE1B	0.296932	1.43372e-06
ENSG00000187741.10	FANCA	0.229439	1.45364e-06
ENSG00000164087.3	POC1A	0.28025	1.46474e-06
ENSG00000134250.13	NOTCH2	0.202551	1.49124e-06
ENSG00000100448.3	CTSG	0.278508	1.56458e-06
ENSG00000115758.8	ODC1	0.234435	1.56644e-06
ENSG00000010292.8	NCAPD2	0.195032	1.56644e-06
ENSG00000172954.9	LCLAT1	0.305903	1.57586e-06
ENSG00000164877.14	MICALL2	-0.405613	1.58038e-06
ENSG00000123136.10	DDX39A	0.224719	1.60547e-06
ENSG00000103257.4	SLC7A5	0.252727	1.64208e-06
ENSG00000182636.4	NDN	0.463671	1.74769e-06
ENSG00000165140.5	FBP1	0.337642	1.75114e-06
ENSG00000148362.6	C9orf142	0.295159	1.79574e-06
ENSG00000116062.10	MSH6	0.197261	1.80559e-06
ENSG00000203392.2	AC105020.1	-0.541286	1.80714e-06
ENSG00000126453.5	BCL2L12	0.276766	1.82498e-06
ENSG00000005884.13	ITGA3	-0.693936	1.86423e-06
ENSG00000143891.12	GALM	0.354347	1.90651e-06
ENSG00000237440.4	ZNF737	0.444388	1.98345e-06
ENSG00000137812.15	CASC5	0.213536	2.00437e-06
ENSG00000078900.10	TP73	0.452345	2.00437e-06
ENSG00000134769.17	DTNA	-0.222196	2.05273e-06
ENSG00000197903.6	HIST1H2BK	0.324649	2.05273e-06
ENSG00000138297.9	TIMM23	0.238805	2.07954e-06
ENSG00000196230.8	TUBB	0.209977	2.17836e-06
ENSG00000101868.6	POLA1	0.188915	2.2389e-06
ENSG00000183044.7	ABAT	-0.388561	2.26196e-06
ENSG00000137310.7	TCF19	0.22911	2.37732e-06
ENSG00000177084.12	POLE	0.198389	2.38412e-06
ENSG00000179409.6	GEMIN4	0.229224	2.41867e-06
ENSG00000163507.9	KIAA1524	0.259534	2.57354e-06
ENSG00000176871.4	WSB2	0.267392	2.68506e-06
ENSG00000171132.9	PRKCE	-0.281032	2.70557e-06
ENSG00000163071.6	SPATA18	-0.767349	2.75766e-06
ENSG00000177602.4	GSG2	0.270939	2.82163e-06
ENSG00000100632.6	ERH	0.237103	2.86423e-06
ENSG00000147955.12	SIGMAR1	0.256222	3.05512e-06
ENSG00000115525.12	ST3GAL5	-0.519387	3.27122e-06
ENSG00000100505.9	TRIM9	-0.282138	3.36312e-06
ENSG00000130340.10	SNX9	0.691482	3.36312e-06
ENSG00000128951.9	DUT	0.23435	3.39099e-06
ENSG00000198912.6	C1orf174	0.226058	3.4091e-06
ENSG00000151503.8	NCAPD3	0.185092	3.42069e-06
ENSG00000087586.13	AURKA	0.213822	3.43904e-06
ENSG00000232634.1	NEFLP1	-0.893553	3.47763e-06
ENSG00000146410.7	MTFR2	0.301469	3.4817e-06
ENSG00000135549.10	PKIB	-0.380076	3.49472e-06
ENSG00000135108.10	FBXO21	0.598346	3.67681e-06
ENSG00000117650.8	NEK2	0.293118	3.79832e-06
ENSG00000175106.12	TVP23C	-0.447562	3.89327e-06
ENSG00000172336.4	POP7	0.284018	3.90768e-06
ENSG00000164237.4	CMBL	-0.765854	3.94193e-06
ENSG00000115053.11	NCL	0.18237	3.95287e-06
ENSG00000111241.2	FGF6	-0.943398	3.95955e-06
ENSG00000138160.4	KIF11	0.196362	3.99198e-06
ENSG00000134871.13	COL4A2	-0.724369	4.09848e-06
ENSG00000143321.14	HDGF	0.198309	4.18691e-06
ENSG00000090889.10	KIF4A	0.211791	4.1943e-06
ENSG00000112297.10	AIM1	-0.217942	4.36363e-06
ENSG00000124942.9	AHNAK	-0.183643	4.40317e-06
ENSG00000184220.6	CMSS1	0.261156	4.5288e-06
ENSG00000116670.10	MAD2L2	0.243812	4.61704e-06
ENSG00000142961.10	MOB3C	-0.27756	4.68202e-06
ENSG00000011304.12	PTBP1	0.189119	4.79282e-06
ENSG00000063438.12	AHRR	-0.259665	4.98731e-06
ENSG00000183273.2	CCDC60	-0.550637	5.27496e-06
ENSG00000261659.2	LA16c-313D11.12	-0.484312	5.34795e-06
ENSG00000119969.10	HELLS	0.215509	5.39245e-06
ENSG00000185090.10	MANEAL	0.394924	5.41782e-06
ENSG00000182578.9	CSF1R	-0.261369	5.46821e-06
ENSG00000044574.7	HSPA5	0.19778	5.82188e-06
ENSG00000260139.2	CSPG4P13	-0.459402	5.8341e-06
ENSG00000222041.6	LINC00152	0.484763	6.0838e-06
ENSG00000184445.7	KNTC1	0.189474	6.08724e-06
ENSG00000143575.10	HAX1	0.263845	6.09275e-06
ENSG00000179361.13	ARID3B	-0.234784	6.12252e-06
ENSG00000228716.2	DHFR	0.279185	6.30783e-06
ENSG00000174021.6	GNG5	0.27539	6.3784e-06
ENSG00000171960.6	PPIH	0.274523	6.5899e-06
ENSG00000166938.8	DIS3L	0.200866	6.5899e-06
ENSG00000197846.3	HIST1H2BF	0.292868	6.63596e-06
ENSG00000164109.9	MAD2L1	0.288029	6.64501e-06
ENSG00000165244.6	ZNF367	0.251085	6.65088e-06
ENSG00000109674.3	NEIL3	0.26164	6.75644e-06
ENSG00000164466.8	SFXN1	0.206518	6.75644e-06
ENSG00000106105.9	GARS	0.241742	6.89996e-06
ENSG00000164611.8	PTTG1	0.245278	6.96005e-06
ENSG00000144554.6	FANCD2	0.19619	7.04113e-06
ENSG00000026103.15	FAS	-0.478159	7.04113e-06
ENSG00000154358.15	OBSCN	-0.473095	7.16967e-06
ENSG00000269667.1	RP11-542M13.2	-0.349303	7.18964e-06
ENSG00000138668.14	HNRNPD	0.189708	7.28817e-06
ENSG00000150681.5	RGS18	-0.475636	7.33932e-06
ENSG00000184825.4	HIST1H2AH	0.296823	7.40773e-06
ENSG00000110934.6	BIN2	-0.214685	7.47472e-06
ENSG00000181938.9	GINS3	0.305901	7.54116e-06
ENSG00000154146.8	NRGN	0.305121	7.72141e-06
ENSG00000169230.5	PRELID1	0.251157	7.88137e-06
ENSG00000066279.12	ASPM	0.210939	7.96538e-06
ENSG00000149328.10	GLB1L2	0.285715	8.00432e-06
ENSG00000149136.3	SSRP1	0.213374	8.04888e-06
ENSG00000130592.9	LSP1	0.558556	8.11894e-06
ENSG00000137309.15	HMGA1	0.24425	8.14034e-06
ENSG00000237649.3	KIFC1	0.20996	8.16931e-06
ENSG00000188486.3	H2AFX	0.273516	8.16931e-06
ENSG00000230330.1	HMGN2P3	0.40174	8.16931e-06
ENSG00000172794.15	RAB37	-0.293006	8.30339e-06
ENSG00000180198.11	RCC1	0.20034	8.39988e-06
ENSG00000144619.10	CNTN4	0.94768	8.58549e-06
ENSG00000119705.5	SLIRP	0.249506	8.67265e-06
ENSG00000109861.11	CTSC	0.196603	8.74826e-06
ENSG00000228526.2	RP3-510D11.1	-0.94907	8.98919e-06
ENSG00000157873.13	TNFRSF14	-0.330259	9.0522e-06
ENSG00000117632.16	STMN1	0.233571	9.44373e-06
ENSG00000133119.8	RFC3	0.294489	9.78814e-06
ENSG00000164032.7	H2AFZ	0.245778	9.81531e-06
ENSG00000101333.12	PLCB4	-0.680299	1.01765e-05
ENSG00000184162.10	NR2C2AP	0.252035	1.03577e-05
ENSG00000101447.9	FAM83D	0.227541	1.0397e-05
ENSG00000214140.6	PRCD	-0.72174	1.0397e-05
ENSG00000125944.14	HNRNPR	0.18404	1.0397e-05
ENSG00000167601.7	AXL	-0.529333	1.0544e-05
ENSG00000134222.12	PSRC1	0.311884	1.08672e-05
ENSG00000105202.3	FBL	0.219515	1.10215e-05
ENSG00000048052.17	HDAC9	-0.264152	1.10215e-05
ENSG00000140403.8	DNAJA4	0.21563	1.10497e-05
ENSG00000108001.9	EBF3	-0.232067	1.10954e-05
ENSG00000149516.9	MS4A3	0.264298	1.11139e-05
ENSG00000188229.5	TUBB4B	0.230123	1.11254e-05
ENSG00000197629.5	MPEG1	-0.226751	1.15809e-05
ENSG00000163918.6	RFC4	0.250944	1.16603e-05
ENSG00000014138.4	POLA2	0.219758	1.17211e-05
ENSG00000160957.8	RECQL4	0.215567	1.24183e-05
ENSG00000163781.8	TOPBP1	0.185779	1.24377e-05
ENSG00000198538.6	ZNF28	0.299835	1.25392e-05
ENSG00000177374.8	HIC1	0.661925	1.26143e-05
ENSG00000135617.3	PRADC1	0.27751	1.27863e-05
ENSG00000198816.5	ZNF358	-0.41176	1.3054e-05
ENSG00000164050.8	PLXNB1	-0.356348	1.30851e-05
ENSG00000058404.15	CAMK2B	-0.938679	1.31914e-05
ENSG00000135605.8	TEC	-0.223925	1.32235e-05
ENSG00000153029.10	MR1	-0.231268	1.32235e-05
ENSG00000123416.11	TUBA1B	0.237908	1.32897e-05
ENSG00000110200.4	ANAPC15	0.336629	1.33011e-05
ENSG00000097046.8	CDC7	0.252542	1.38837e-05
ENSG00000163393.8	SLC22A15	-0.220896	1.38837e-05
ENSG00000120438.7	TCP1	0.198727	1.38837e-05
ENSG00000105281.8	SLC1A5	0.228323	1.4223e-05
ENSG00000132002.3	DNAJB1	0.217637	1.42918e-05
ENSG00000113368.7	LMNB1	0.167505	1.43021e-05
ENSG00000168078.5	PBK	0.264707	1.44313e-05
ENSG00000075218.14	GTSE1	0.187239	1.45386e-05
ENSG00000089248.6	ERP29	0.195019	1.48476e-05
ENSG00000181381.9	DDX60L	-0.339993	1.50093e-05
ENSG00000171509.11	RXFP1	-0.277359	1.51063e-05
ENSG00000125089.12	SH3TC1	-0.449615	1.52794e-05
ENSG00000184983.5	NDUFA6	0.229081	1.58066e-05
ENSG00000184990.8	SIVA1	0.249629	1.60083e-05
ENSG00000116237.11	ICMT	0.201758	1.62477e-05
ENSG00000110628.9	SLC22A18	-0.321065	1.62477e-05
ENSG00000095002.8	MSH2	0.228783	1.62853e-05
ENSG00000110047.13	EHD1	0.234738	1.70015e-05
ENSG00000198300.8	PEG3	-0.434776	1.70599e-05
ENSG00000112773.11	FAM46A	-0.239501	1.71954e-05
ENSG00000162783.8	IER5	-0.285619	1.71954e-05
ENSG00000165490.8	C11orf82	0.256434	1.80555e-05
ENSG00000137337.10	MDC1	0.204108	1.80555e-05
ENSG00000196576.10	PLXNB2	-0.218468	1.81718e-05
ENSG00000127329.10	PTPRB	-0.304095	1.98129e-05
ENSG00000103222.14	ABCC1	-0.205087	1.98726e-05
ENSG00000059377.11	TBXAS1	-0.306786	1.98726e-05
ENSG00000256897.1	RP11-17G12.2	-0.564426	2.04215e-05
ENSG00000166123.9	GPT2	0.213687	2.04215e-05
ENSG00000100142.10	POLR2F	0.283796	2.06052e-05
ENSG00000142864.10	SERBP1	0.172367	2.0707e-05
ENSG00000224818.1	RP11-134G8.8	-0.601642	2.11229e-05
ENSG00000135414.5	GDF11	-0.257672	2.12076e-05
ENSG00000116161.13	CACYBP	0.240499	2.15163e-05
ENSG00000226950.2	DANCR	0.206715	2.15163e-05
ENSG00000128272.10	ATF4	0.249217	2.28678e-05
ENSG00000137807.9	KIF23	0.223502	2.29452e-05
ENSG00000177663.9	IL17RA	-0.186679	2.35631e-05
ENSG00000153044.5	CENPH	0.338	2.35631e-05
ENSG00000034063.9	UHRF1	0.172957	2.36174e-05
ENSG00000170779.10	CDCA4	0.209745	2.3928e-05
ENSG00000140564.6	FURIN	-0.264048	2.43233e-05
ENSG00000166949.11	SMAD3	-0.207307	2.47619e-05
ENSG00000146670.5	CDCA5	0.227965	2.49814e-05
ENSG00000159363.13	ATP13A2	0.282747	2.5085e-05
ENSG00000139579.8	NABP2	0.226629	2.60184e-05
ENSG00000126602.6	TRAP1	0.184272	2.62986e-05
ENSG00000188130.9	MAPK12	0.220368	2.64134e-05
ENSG00000146918.15	NCAPG2	0.185811	2.70477e-05
ENSG00000182378.8	PLCXD1	0.24101	2.73039e-05
ENSG00000130720.8	FIBCD1	-0.405643	2.77939e-05
ENSG00000170860.3	LSM3	0.276828	2.77939e-05
ENSG00000166016.4	ABTB2	-0.276727	2.77939e-05
ENSG00000164111.10	ANXA5	0.219353	2.77939e-05
ENSG00000198056.9	PRIM1	0.272854	2.77939e-05
ENSG00000100373.5	UPK3A	0.472145	2.8627e-05
ENSG00000174371.12	EXO1	0.212356	2.87011e-05
ENSG00000141298.13	SSH2	-0.170754	2.99379e-05
ENSG00000157227.8	MMP14	-0.200526	3.04104e-05
ENSG00000075131.5	TIPIN	0.263995	3.04268e-05
ENSG00000128228.4	SDF2L1	0.28254	3.06421e-05
ENSG00000099958.10	DERL3	0.314718	3.08247e-05
ENSG00000127564.12	PKMYT1	0.236148	3.09505e-05
ENSG00000224078.8	SNHG14	-0.17693	3.15541e-05
ENSG00000164053.13	ATRIP	0.269298	3.19958e-05
ENSG00000099337.3	KCNK6	-0.253877	3.20811e-05
ENSG00000120594.12	PLXDC2	0.294031	3.20811e-05
ENSG00000174547.9	MRPL11	0.229559	3.37446e-05
ENSG00000172965.10	MIR4435-1HG	0.307578	3.40092e-05
ENSG00000128050.4	PAICS	0.214518	3.40341e-05
ENSG00000076641.4	PAG1	-0.164171	3.44582e-05
ENSG00000234171.1	AC108488.3	0.423305	3.48565e-05
ENSG00000163170.7	BOLA3	0.267603	3.48565e-05
ENSG00000198176.8	TFDP1	0.181876	3.48565e-05
ENSG00000159055.3	MIS18A	0.268113	3.50735e-05
ENSG00000149929.11	HIRIP3	0.264603	3.63361e-05
ENSG00000131067.12	GGT7	-0.330201	3.65426e-05
ENSG00000118369.8	USP35	-0.313086	3.77192e-05
ENSG00000272914.1	RP11-330O11.3	-0.479031	3.77192e-05
ENSG00000160593.13	AMICA1	-0.34719	3.85311e-05
ENSG00000182512.4	GLRX5	0.217979	3.85462e-05
ENSG00000159733.9	ZFYVE28	-0.946066	3.85462e-05
ENSG00000179958.4	DCTPP1	0.238348	3.86271e-05
ENSG00000131747.10	TOP2A	0.196289	3.8796e-05
ENSG00000163823.3	CCR1	0.253772	3.93085e-05
ENSG00000163683.7	SMIM14	-0.378474	3.94002e-05
ENSG00000162607.8	USP1	0.230928	4.0656e-05
ENSG00000140199.7	SLC12A6	-0.220095	4.09171e-05
ENSG00000130518.12	KIAA1683	-0.315182	4.09171e-05
ENSG00000092853.9	CLSPN	0.180977	4.09883e-05
ENSG00000165502.6	RPL36AL	0.252585	4.10122e-05
ENSG00000033627.10	ATP6V0A1	-0.246118	4.10122e-05
ENSG00000070950.5	RAD18	0.206385	4.10122e-05
ENSG00000248636.2	RP11-768F21.1	-0.380223	4.10122e-05
ENSG00000088833.13	NSFL1C	0.188108	4.10448e-05
ENSG00000115806.8	GORASP2	0.196328	4.10834e-05
ENSG00000204217.8	BMPR2	-0.299356	4.23079e-05
ENSG00000184270.3	HIST2H2AB	0.239133	4.23284e-05
ENSG00000135912.6	TTLL4	0.198406	4.27093e-05
ENSG00000152253.4	SPC25	0.269541	4.29709e-05
ENSG00000137404.10	NRM	0.248165	4.38193e-05
ENSG00000166825.9	ANPEP	-0.702361	4.45965e-05
ENSG00000156521.9	TYSND1	0.242092	4.45965e-05
ENSG00000069849.6	ATP1B3	0.206093	4.5745e-05
ENSG00000173598.9	NUDT4	0.200758	4.61562e-05
ENSG00000246130.1	RP11-875O11.2	-0.773353	4.7004e-05
ENSG00000154719.9	MRPL39	0.230265	4.75787e-05
ENSG00000135424.11	ITGA7	-0.23027	4.80421e-05
ENSG00000116133.7	DHCR24	0.205992	4.89701e-05
ENSG00000009954.6	BAZ1B	0.150817	5.02139e-05
ENSG00000095209.7	TMEM38B	0.268063	5.02755e-05
ENSG00000106638.11	TBL2	0.21295	5.0574e-05
ENSG00000136699.15	SMPD4	0.198297	5.11806e-05
ENSG00000103018.12	CYB5B	0.197491	5.13556e-05
ENSG00000188549.8	C15orf52	-0.52213	5.15279e-05
ENSG00000166803.6	KIAA0101	0.252253	5.19685e-05
ENSG00000104626.10	ERI1	0.202931	5.20855e-05
ENSG00000108312.10	UBTF	0.186559	5.27958e-05
ENSG00000198901.9	PRC1	0.19175	5.31436e-05
ENSG00000035141.3	FAM136A	0.216705	5.33845e-05
ENSG00000156299.8	TIAM1	-0.298603	5.44239e-05
ENSG00000151849.10	CENPJ	0.194534	5.44239e-05
ENSG00000135272.5	MDFIC	0.266495	5.44239e-05
ENSG00000169607.8	CKAP2L	0.253192	5.46789e-05
ENSG00000162511.7	LAPTM5	-0.180648	5.46789e-05
ENSG00000131969.10	ABHD12B	-0.353834	5.6908e-05
ENSG00000233822.3	HIST1H2BN	0.269023	5.7161e-05
ENSG00000108829.9	LRRC59	0.196252	5.72404e-05
ENSG00000160447.6	PKN3	0.283161	5.76465e-05
ENSG00000249115.4	HAUS5	0.232879	5.77268e-05
ENSG00000169813.12	HNRNPF	0.163599	5.77436e-05
ENSG00000151065.9	DCP1B	-0.240276	5.80363e-05
ENSG00000158470.5	B4GALT5	0.167297	5.80363e-05
ENSG00000182199.6	SHMT2	0.231398	5.81479e-05
ENSG00000221926.7	TRIM16	-0.206757	5.86592e-05
ENSG00000168329.9	CX3CR1	-0.422053	5.88581e-05
ENSG00000051596.5	THOC3	0.227352	5.91938e-05
ENSG00000130826.11	DKC1	0.168818	5.96066e-05
ENSG00000100401.15	RANGAP1	0.178265	5.96066e-05
ENSG00000215246.4	RP11-43F13.3	-0.29147	5.96066e-05
ENSG00000163950.8	SLBP	0.22149	6.02259e-05
ENSG00000176974.13	SHMT1	0.232479	6.14975e-05
ENSG00000139174.6	PRICKLE1	0.321267	6.25911e-05
ENSG00000106976.14	DNM1	-0.241631	6.30286e-05
ENSG00000135111.10	TBX3	0.360614	6.40599e-05
ENSG00000149485.12	FADS1	0.186853	6.47664e-05
ENSG00000107438.4	PDLIM1	0.186417	6.5986e-05
ENSG00000126351.8	THRA	0.248502	6.60495e-05
ENSG00000184939.11	ZFP90	-0.219804	6.65723e-05
ENSG00000125810.9	CD93	-0.544581	6.65723e-05
ENSG00000159307.14	SCUBE1	-0.230907	6.66018e-05
ENSG00000108106.9	UBE2S	0.24576	6.70062e-05
ENSG00000107833.6	NPM3	0.261528	6.72878e-05
ENSG00000163915.3	C3orf65	-0.386637	6.72878e-05
ENSG00000108671.5	PSMD11	0.19494	6.7707e-05
ENSG00000101412.9	E2F1	0.229828	6.7913e-05
ENSG00000163864.10	NMNAT3	-0.266364	6.85295e-05
ENSG00000142168.10	SOD1	0.227874	6.85295e-05
ENSG00000142507.5	PSMB6	0.209621	6.85295e-05
ENSG00000173085.9	COQ2	0.197568	6.86435e-05
ENSG00000197451.6	HNRNPAB	0.161373	6.89564e-05
ENSG00000165304.3	MELK	0.221055	6.9428e-05
ENSG00000009413.11	REV3L	-0.186755	6.95719e-05
ENSG00000105197.6	TIMM50	0.190077	7.00302e-05
ENSG00000140332.11	TLE3	0.187266	7.00302e-05
ENSG00000139624.8	CERS5	-0.196037	7.26021e-05
ENSG00000141560.10	FN3KRP	0.23732	7.27542e-05
ENSG00000123983.9	ACSL3	0.206756	7.27841e-05
ENSG00000127022.10	CANX	0.170239	7.27841e-05
ENSG00000145012.8	LPP	-0.249269	7.33284e-05
ENSG00000175040.4	CHST2	0.38888	7.33786e-05
ENSG00000165102.10	HGSNAT	-0.179835	7.33786e-05
ENSG00000104549.7	SQLE	0.215136	7.51195e-05
ENSG00000187837.2	HIST1H1C	0.237348	7.51346e-05
ENSG00000075188.4	NUP37	0.254466	7.59344e-05
ENSG00000166750.5	SLFN5	-0.492882	7.73414e-05
ENSG00000118495.14	PLAGL1	0.30878	7.74906e-05
ENSG00000100138.9	NHP2L1	0.209198	7.90304e-05
ENSG00000130193.7	THEM6	0.237356	8.08568e-05
ENSG00000170515.9	PA2G4	0.201145	8.14306e-05
ENSG00000132780.12	NASP	0.162879	8.23243e-05
ENSG00000117862.7	TXNDC12	0.209371	8.24047e-05
ENSG00000084234.12	APLP2	0.153551	8.33549e-05
ENSG00000128881.12	TTBK2	-0.197991	8.39129e-05
ENSG00000166986.8	MARS	0.209588	8.40443e-05
ENSG00000116221.11	MRPL37	0.216244	8.40443e-05
ENSG00000160949.12	TONSL	0.211125	8.4505e-05
ENSG00000104980.3	TIMM44	0.197778	8.4505e-05
ENSG00000117289.7	TXNIP	-0.184475	8.5271e-05
ENSG00000166881.5	TMEM194A	0.201176	8.61979e-05
ENSG00000051128.14	HOMER3	-0.322793	8.70826e-05
ENSG00000075391.12	RASAL2	-0.182434	8.7328e-05
ENSG00000183508.4	FAM46C	0.31861	8.74542e-05
ENSG00000168274.3	HIST1H2AE	0.272749	8.79711e-05
ENSG00000224116.2	INHBA-AS1	-0.320112	8.94774e-05
ENSG00000095485.12	CWF19L1	0.230109	8.96379e-05
ENSG00000182481.4	KPNA2	0.185203	8.96379e-05
ENSG00000145050.11	MANF	0.245813	8.969e-05
ENSG00000188856.6	RPSAP47	0.379461	9.40528e-05
ENSG00000188626.5	GOLGA8M	-0.167496	9.40528e-05
ENSG00000135766.8	EGLN1	0.230167	9.40528e-05
ENSG00000100364.14	KIAA0930	0.168935	9.48418e-05
ENSG00000183734.4	ASCL2	0.502353	9.5282e-05
ENSG00000183955.8	SETD8	0.190311	9.55746e-05
ENSG00000196083.5	IL1RAP	-0.180128	9.64478e-05
ENSG00000173465.3	SSSCA1	0.249037	9.64478e-05
ENSG00000136450.8	SRSF1	0.168669	9.67966e-05
ENSG00000004478.5	FKBP4	0.19238	9.68741e-05
ENSG00000188001.5	TPRG1	-0.600948	9.69619e-05
ENSG00000158042.8	MRPL17	0.205126	9.8889e-05
ENSG00000183048.7	SLC25A10	0.263341	9.8889e-05
ENSG00000077264.10	PAK3	-0.826847	9.89635e-05
ENSG00000071242.7	RPS6KA2	-0.313125	0.000100511
ENSG00000112290.8	WASF1	-0.345765	0.000101325
ENSG00000105639.14	JAK3	-0.402194	0.000103022
ENSG00000108424.5	KPNB1	0.152147	0.000103165
ENSG00000131351.10	HAUS8	0.232621	0.000103165
ENSG00000250903.4	GMDS-AS1	-0.290068	0.000103165
ENSG00000163006.7	CCDC138	0.258642	0.000105719
ENSG00000134308.9	YWHAQ	0.202056	0.000106134
ENSG00000101224.13	CDC25B	0.211047	0.000106134
ENSG00000226806.1	AC011893.3	-0.404616	0.000106134
ENSG00000106399.7	RPA3	0.280481	0.000106765
ENSG00000099341.7	PSMD8	0.209331	0.000108119
ENSG00000113569.11	NUP155	0.172923	0.000108625
ENSG00000164070.7	HSPA4L	0.22932	0.00010872
ENSG00000005379.11	BZRAP1	-0.235042	0.000110463
ENSG00000139514.8	SLC7A1	0.173707	0.000111455
ENSG00000126067.7	PSMB2	0.203881	0.000112689
ENSG00000267136.1	RP11-53B2.3	-0.476491	0.000112689
ENSG00000170581.9	STAT2	-0.167887	0.000114177
ENSG00000149294.12	NCAM1	0.396302	0.000114177
ENSG00000228253.1	MT-ATP8	0.213852	0.000114349
ENSG00000179029.10	TMEM107	0.276548	0.000114349
ENSG00000183763.4	TRAIP	0.276926	0.00011629
ENSG00000254838.4	GVINP1	-0.581949	0.00011629
ENSG00000256655.1	TMEM75	-0.340476	0.000116494
ENSG00000132313.10	MRPL35	0.212989	0.000116677
ENSG00000117395.6	EBNA1BP2	0.200188	0.000117287
ENSG00000188157.9	AGRN	-0.221694	0.000117958
ENSG00000111788.9	RP11-22B23.1	0.267819	0.000117958
ENSG00000213047.7	DENND1B	-0.235178	0.000117958
ENSG00000072135.8	PTPN18	0.180269	0.000118232
ENSG00000060982.10	BCAT1	0.237612	0.000118796
ENSG00000161911.7	TREML1	-0.694729	0.000119445
ENSG00000137038.7	TMEM261	0.245109	0.000121286
ENSG00000120802.9	TMPO	0.232427	0.000123051
ENSG00000138316.6	ADAMTS14	-0.459658	0.000124748
ENSG00000080824.14	HSP90AA1	0.174837	0.000125369
ENSG00000136367.12	ZFHX2	-0.348849	0.000126703
ENSG00000108523.11	RNF167	0.19697	0.000126703
ENSG00000188215.5	DCUN1D3	-0.2559	0.000127166
ENSG00000166341.6	DCHS1	-0.442749	0.000127238
ENSG00000198826.6	ARHGAP11A	0.166076	0.000130328
ENSG00000123374.6	CDK2	0.218875	0.000132026
ENSG00000104998.2	IL27RA	0.454175	0.000132026
ENSG00000163399.11	ATP1A1	0.157869	0.000132192
ENSG00000229153.1	EPHA1-AS1	-0.354345	0.000132192
ENSG00000137880.4	GCHFR	0.291528	0.000133405
ENSG00000120254.11	MTHFD1L	-0.168014	0.000134873
ENSG00000176946.7	THAP4	0.206125	0.000134873
ENSG00000099817.7	POLR2E	0.213636	0.00013563
ENSG00000117362.8	APH1A	0.189526	0.000136102
ENSG00000126759.8	CFP	0.28072	0.000136904
ENSG00000237190.3	CDKN2AIPNL	0.21955	0.000138755
ENSG00000165272.10	AQP3	-0.369566	0.000139057
ENSG00000171631.10	P2RY6	0.199498	0.000139557
ENSG00000165175.11	MID1IP1	0.24471	0.000139719
ENSG00000007866.14	TEAD3	0.244926	0.00014019
ENSG00000105364.9	MRPL4	0.206301	0.00014019
ENSG00000140525.13	FANCI	0.17885	0.000141979
ENSG00000134333.9	LDHA	0.191838	0.000142784
ENSG00000141552.13	ANAPC11	0.222742	0.000143386
ENSG00000213443.2	RP11-75L1.2	-0.340088	0.000144214
ENSG00000146281.5	PM20D2	0.208673	0.000144295
ENSG00000169689.10	STRA13	0.22609	0.000145096
ENSG00000185480.7	PARPBP	0.23409	0.000149315
ENSG00000224982.2	TMEM233	-0.200094	0.000150876
ENSG00000127423.6	AUNIP	0.300463	0.000152551
ENSG00000074582.8	BCS1L	0.201426	0.000152879
ENSG00000115241.9	PPM1G	0.19398	0.00015516
ENSG00000115232.9	ITGA4	-0.169691	0.00015562
ENSG00000267702.1	RP11-53B2.2	-0.295209	0.00015562
ENSG00000170089.11	RP11-423H2.1	0.329022	0.000156619
ENSG00000080845.13	DLGAP4	-0.214402	0.000156698
ENSG00000131507.9	NDFIP1	0.193102	0.000158364
ENSG00000142731.6	PLK4	0.231021	0.000158364
ENSG00000101493.6	ZNF516	-0.172069	0.000158595
ENSG00000237135.1	DDX10P1	-0.431496	0.000158595
ENSG00000013306.11	SLC25A39	0.199559	0.000159366
ENSG00000126787.8	DLGAP5	0.218582	0.000159625
ENSG00000258225.1	RP11-136F16.1	-0.846474	0.000159625
ENSG00000063244.8	U2AF2	0.178042	0.000159776
ENSG00000139278.5	GLIPR1	-0.207081	0.000159789
ENSG00000196547.10	MAN2A2	-0.184515	0.000161912
ENSG00000108561.4	C1QBP	0.180708	0.000161912
ENSG00000243244.1	STON1	-0.46906	0.000161912
ENSG00000247077.2	PGAM5	0.219121	0.000163472
ENSG00000112742.5	TTK	0.258491	0.000165277
ENSG00000173113.2	TRMT112	0.232099	0.000168062
ENSG00000122966.9	CIT	0.160457	0.000168062
ENSG00000164338.5	UTP15	0.248353	0.000168137
ENSG00000213024.6	NUP62	0.174632	0.000168603
ENSG00000128245.10	YWHAH	0.191837	0.000168868
ENSG00000170734.7	POLH	-0.194732	0.000169811
ENSG00000196290.10	NIF3L1	0.213423	0.000170087
ENSG00000205682.2	RP11-798L4.1	-0.777534	0.000172145
ENSG00000139182.9	CLSTN3	-0.324533	0.000172145
ENSG00000106789.8	CORO2A	0.640136	0.000179111
ENSG00000185043.6	CIB1	0.215039	0.000180416
ENSG00000130816.10	DNMT1	0.161689	0.000182727
ENSG00000248527.1	MTATP6P1	0.237056	0.000184436
ENSG00000144381.12	HSPD1	0.17858	0.000186749
ENSG00000149636.11	DSN1	0.213579	0.000187062
ENSG00000152270.4	PDE3B	-0.172022	0.000187265
ENSG00000010810.13	FYN	-0.465442	0.000187476
ENSG00000175832.8	ETV4	0.473236	0.000188193
ENSG00000135632.7	SMYD5	0.230929	0.000189943
ENSG00000172167.3	MTBP	0.229466	0.000190526
ENSG00000137474.15	MYO7A	-0.252538	0.000190526
ENSG00000082397.11	EPB41L3	-0.178986	0.000191768
ENSG00000134138.15	MEIS2	0.279111	0.000193388
ENSG00000094914.8	AAAS	0.218519	0.000196845
ENSG00000145220.9	LYAR	0.209121	0.000197855
ENSG00000100479.8	POLE2	0.242128	0.000197855
ENSG00000203813.4	HIST1H3H	0.409303	0.000198652
ENSG00000175756.9	AURKAIP1	0.229677	0.000198652
ENSG00000168439.12	STIP1	0.182812	0.000199969
ENSG00000147224.6	PRPS1	0.224281	0.000206636
ENSG00000155660.6	PDIA4	0.161243	0.000206636
ENSG00000198924.3	DCLRE1A	0.25766	0.000212905
ENSG00000165724.5	ZMYND19	0.202744	0.000213006
ENSG00000117419.10	ERI3	0.179538	0.000213006
ENSG00000091483.6	FH	0.190649	0.000213282
ENSG00000027001.7	MIPEP	0.273871	0.000213871
ENSG00000048471.9	SNX29	-0.216705	0.000219253
ENSG00000172819.12	RARG	0.477011	0.000219296
ENSG00000151287.12	TEX30	0.255064	0.000222686
ENSG00000086232.8	EIF2AK1	0.148644	0.000224535
ENSG00000263426.1	RN7SL471P	0.448317	0.000224933
ENSG00000267100.1	ILF3-AS1	0.248504	0.000224933
ENSG00000144580.9	RQCD1	0.162999	0.000225371
ENSG00000156802.8	ATAD2	0.153275	0.000228256
ENSG00000174083.13	PIK3R6	-0.369285	0.000228585
ENSG00000163002.8	NUP35	0.22379	0.000228884
ENSG00000231889.3	TRAF3IP2-AS1	-0.351156	0.000228884
ENSG00000143761.9	ARF1	0.186335	0.000229474
ENSG00000000938.8	FGR	0.40858	0.000229567
ENSG00000135336.10	ORC3	0.224523	0.000232434
ENSG00000070718.7	AP3M2	0.219031	0.000232434
ENSG00000123737.8	EXOSC9	0.240139	0.000233214
ENSG00000160014.12	CALM3	0.16699	0.000233488
ENSG00000065882.11	TBC1D1	0.162613	0.000237489
ENSG00000165476.8	REEP3	0.206829	0.000237489
ENSG00000148459.11	PDSS1	0.226298	0.000238388
ENSG00000103313.7	MEFV	-0.29901	0.00023908
ENSG00000111647.8	UHRF1BP1L	-0.171927	0.00024163
ENSG00000150760.8	DOCK1	-0.737521	0.000241922
ENSG00000187607.11	ZNF286A	-0.230097	0.000242261
ENSG00000188987.2	HIST1H4D	0.402472	0.000242946
ENSG00000101160.9	CTSZ	0.200745	0.000242946
ENSG00000189067.8	LITAF	0.331096	0.000242959
ENSG00000092820.13	EZR	0.190031	0.000243723
ENSG00000158805.7	ZNF276	-0.188726	0.000243723
ENSG00000111639.3	MRPL51	0.212319	0.000243723
ENSG00000115844.6	DLX2	-0.740946	0.000243892
ENSG00000152147.6	GEMIN6	0.289251	0.0002482
ENSG00000135951.10	TSGA10	-0.387462	0.000248479
ENSG00000134291.7	TMEM106C	0.204577	0.000252593
ENSG00000171421.8	MRPL36	0.245165	0.00025401
ENSG00000232677.2	LINC00665	-0.517981	0.000254701
ENSG00000181666.13	HKR1	-0.185113	0.000256871
ENSG00000132383.7	RPA1	0.162573	0.000259547
ENSG00000103342.8	GSPT1	0.155056	0.00026045
ENSG00000165916.4	PSMC3	0.194951	0.00027274
ENSG00000142528.11	ZNF473	0.180251	0.000276203
ENSG00000126767.13	ELK1	0.212611	0.000276829
ENSG00000110031.8	LPXN	-0.163866	0.000276829
ENSG00000006756.11	ARSD	-0.20597	0.000276829
ENSG00000136875.8	PRPF4	0.174932	0.000281397
ENSG00000151079.6	KCNA6	-0.492752	0.000281774
ENSG00000161800.8	RACGAP1	0.174756	0.000281774
ENSG00000196295.7	AC005154.6	-0.185963	0.000287074
ENSG00000197299.6	BLM	0.176394	0.000288485
ENSG00000151490.9	PTPRO	-0.559093	0.000288492
ENSG00000205208.4	C4orf46	0.238817	0.000288789
ENSG00000146842.12	TMEM209	0.234159	0.000290604
ENSG00000092964.12	DPYSL2	-0.165503	0.000298678
ENSG00000225988.1	RP5-1119D9.4	-0.202638	0.000302769
ENSG00000119403.9	PHF19	0.192625	0.000306532
ENSG00000163453.7	IGFBP7	-0.233041	0.000306641
ENSG00000097021.15	ACOT7	0.216583	0.000312
ENSG00000111247.10	RAD51AP1	0.252612	0.000322793
ENSG00000234664.1	HMGN2P5	0.292798	0.000325295
ENSG00000196226.2	HIST1H2BB	0.262913	0.00032605
ENSG00000184076.10	UQCR10	0.225126	0.000330269
ENSG00000172322.9	CLEC12A	-0.333582	0.000330269
ENSG00000102471.9	NDFIP2	-0.225704	0.000334769
ENSG00000124491.11	F13A1	-0.216365	0.000337857
ENSG00000198055.6	GRK6	0.202171	0.000337872
ENSG00000134809.4	TIMM10	0.265871	0.000338182
ENSG00000172183.10	ISG20	-0.519364	0.000341423
ENSG00000187266.9	EPOR	0.312729	0.000341784
ENSG00000183765.16	CHEK2	0.192943	0.000344513
ENSG00000102524.7	TNFSF13B	-0.251533	0.000349207
ENSG00000205213.9	LGR4	0.209317	0.000349207
ENSG00000145194.13	ECE2	0.296511	0.000349234
ENSG00000116985.6	BMP8B	0.268177	0.00035362
ENSG00000196331.5	HIST1H2BO	0.38869	0.00035362
ENSG00000154262.8	ABCA6	-0.621328	0.00035362
ENSG00000091651.4	ORC6	0.192864	0.000360978
ENSG00000239672.3	NME1	0.202803	0.000363163
ENSG00000123080.6	CDKN2C	0.226005	0.000363163
ENSG00000118762.3	PKD2	-0.181296	0.000365219
ENSG00000095319.10	NUP188	0.171661	0.000368068
ENSG00000075336.7	TIMM21	0.203591	0.000378175
ENSG00000075702.12	WDR62	0.174185	0.000380468
ENSG00000115977.14	AAK1	-0.184254	0.000380468
ENSG00000132507.13	EIF5A	0.182281	0.000381817
ENSG00000164687.6	FABP5	0.249987	0.000383764
ENSG00000132535.14	DLG4	-0.257825	0.000387607
ENSG00000196141.8	SPATS2L	0.296782	0.000389164
ENSG00000175216.10	CKAP5	0.146224	0.000389387
ENSG00000053372.4	MRTO4	0.184708	0.000390667
ENSG00000267106.1	C19orf82	-0.298529	0.0003956
ENSG00000183486.8	MX2	-0.305485	0.000396217
ENSG00000198558.2	HIST1H4L	0.399903	0.000396217
ENSG00000198435.2	NRARP	0.272152	0.000396679
ENSG00000124207.12	CSE1L	0.192551	0.000397479
ENSG00000096060.10	FKBP5	0.157574	0.000397999
ENSG00000163808.12	KIF15	0.175003	0.000398041
ENSG00000149548.10	CCDC15	0.24656	0.00040209
ENSG00000164620.4	RELL2	-0.228438	0.000412075
ENSG00000025770.14	NCAPH2	0.22118	0.000413707
ENSG00000053254.11	FOXN3	-0.141865	0.000414538
ENSG00000150768.11	DLAT	0.190301	0.000414636
ENSG00000109971.9	HSPA8	0.178194	0.000418702
ENSG00000173660.7	UQCRH	0.195633	0.000420222
ENSG00000257093.2	KIAA1147	-0.173534	0.000432073
ENSG00000164010.9	ERMAP	-0.217675	0.000440094
ENSG00000050405.9	LIMA1	-0.199575	0.000440094
ENSG00000006534.11	ALDH3B1	-0.191157	0.000443595
ENSG00000171791.10	BCL2	0.134869	0.00044401
ENSG00000138760.4	SCARB2	-0.229217	0.000444839
ENSG00000000460.12	C1orf112	0.20888	0.000444839
ENSG00000143543.10	JTB	0.186235	0.000444839
ENSG00000241685.4	ARPC1A	0.167239	0.000458479
ENSG00000136169.12	SETDB2	-0.165954	0.000464146
ENSG00000168159.9	RNF187	0.190421	0.0004645
ENSG00000171811.8	TTC40	-0.577871	0.000464835
ENSG00000090273.9	NUDC	0.184135	0.000466199
ENSG00000075151.15	EIF4G3	-0.147842	0.000467049
ENSG00000183617.4	MRPL54	0.224881	0.00047014
ENSG00000100503.19	NIN	-0.133476	0.000470904
ENSG00000172590.14	MRPL52	0.231625	0.000470904
ENSG00000247092.2	SNHG10	0.267938	0.000470904
ENSG00000184988.4	TMEM106A	-0.246614	0.000472418
ENSG00000189043.5	NDUFA4	0.209508	0.00047477
ENSG00000065518.7	NDUFB4	0.212346	0.000476444
ENSG00000139684.9	ESD	0.203177	0.000476907
ENSG00000143319.12	ISG20L2	0.166153	0.00047769
ENSG00000127220.5	ABHD8	-0.271949	0.000481036
ENSG00000122140.6	MRPS2	0.207452	0.000482444
ENSG00000120694.15	HSPH1	0.154644	0.000490056
ENSG00000185721.7	DRG1	0.171602	0.000491261
ENSG00000196628.9	TCF4	-0.196859	0.000493474
ENSG00000183386.5	FHL3	-0.328334	0.00049536
ENSG00000132341.7	RAN	0.170591	0.00049536
ENSG00000128596.12	CCDC136	-0.360074	0.000495713
ENSG00000042832.7	TG	-0.688168	0.000496472
ENSG00000143314.8	MRPL24	0.200483	0.00050457
ENSG00000251045.1	CTC-321K16.4	-0.754658	0.000507842
ENSG00000113013.8	HSPA9	0.153652	0.000510712
ENSG00000127586.12	CHTF18	0.238401	0.000511365
ENSG00000136518.12	ACTL6A	0.179809	0.000515104
ENSG00000074696.8	PTPLAD1	0.186828	0.000515104
ENSG00000184436.7	THAP7	0.231173	0.00052204
ENSG00000214787.4	MS4A4E	-0.275492	0.00052204
ENSG00000177733.4	HNRNPA0	0.157567	0.000523187
ENSG00000081189.9	MEF2C	-0.165514	0.000524308
ENSG00000144736.9	SHQ1	0.178174	0.000525941
ENSG00000152061.17	RABGAP1L	-0.162683	0.000526213
ENSG00000108953.12	YWHAE	0.174082	0.000529374
ENSG00000169715.10	MT1E	0.225968	0.000529374
ENSG00000182180.9	MRPS16	0.183323	0.000529374
ENSG00000152620.8	NADK2	0.185815	0.000529374
ENSG00000112667.8	DNPH1	0.226777	0.000531879
ENSG00000149809.10	TM7SF2	-0.266614	0.000532842
ENSG00000246263.2	KB-431C1.4	-0.277781	0.000532842
ENSG00000122566.16	HNRNPA2B1	0.138868	0.000543027
ENSG00000158710.10	TAGLN2	0.17195	0.00054572
ENSG00000168411.9	RFWD3	0.149845	0.000549332
ENSG00000212907.2	MT-ND4L	0.185579	0.00055688
ENSG00000185104.15	FAF1	0.172131	0.000559729
ENSG00000135678.7	CPM	0.166583	0.00056055
ENSG00000206053.8	HN1L	0.177576	0.000561989
ENSG00000173821.15	RNF213	-0.164015	0.000564236
ENSG00000070814.13	TCOF1	0.172281	0.000567293
ENSG00000138092.6	CENPO	0.180185	0.00057233
ENSG00000230069.3	LRRC37A15P	-0.369406	0.000580064
ENSG00000074201.4	CLNS1A	0.152193	0.000584524
ENSG00000086827.4	ZW10	0.219955	0.000584524
ENSG00000171236.9	LRG1	0.252404	0.000585723
ENSG00000078487.13	ZCWPW1	-0.398804	0.00058841
ENSG00000128944.9	KNSTRN	0.196868	0.000590337
ENSG00000136048.9	DRAM1	-0.38089	0.000590337
ENSG00000099783.7	HNRNPM	0.144225	0.000590413
ENSG00000117143.9	UAP1	0.21608	0.000591578
ENSG00000117593.8	DARS2	0.196132	0.000591578
ENSG00000107957.12	SH3PXD2A	-0.502218	0.000591578
ENSG00000169439.7	SDC2	0.243537	0.000591578
ENSG00000120896.9	SORBS3	0.185718	0.000591578
ENSG00000178307.5	TMEM11	0.207352	0.000596515
ENSG00000154839.5	SKA1	0.237588	0.000596687
ENSG00000119335.12	SET	0.175067	0.000599906
ENSG00000198695.2	MT-ND6	0.161102	0.000601779
ENSG00000100336.13	APOL4	-0.201851	0.000612117
ENSG00000101220.13	C20orf27	0.180394	0.000613301
ENSG00000069998.8	CECR5	0.180934	0.000615992
ENSG00000130208.5	APOC1	0.739426	0.000627037
ENSG00000125835.13	SNRPB	0.188724	0.000627037
ENSG00000123473.11	STIL	0.177167	0.000628313
ENSG00000035928.10	RFC1	0.158946	0.00063165
ENSG00000135045.6	C9orf40	0.214072	0.000642244
ENSG00000160752.10	FDPS	0.188656	0.000643459
ENSG00000147536.7	GINS4	0.210598	0.000647444
ENSG00000117877.6	CD3EAP	0.253034	0.000647444
ENSG00000196605.3	ZNF846	-0.406655	0.000657635
ENSG00000163812.9	ZDHHC3	0.14128	0.000658972
ENSG00000125124.7	BBS2	-0.187878	0.000658972
ENSG00000130165.6	ELOF1	0.218401	0.000659418
ENSG00000198625.8	MDM4	0.158041	0.000660683
ENSG00000164649.15	CDCA7L	0.167792	0.000663047
ENSG00000156928.4	MALSU1	0.238754	0.000663047
ENSG00000130204.8	TOMM40	0.174392	0.000667751
ENSG00000128973.7	CLN6	0.160104	0.000670316
ENSG00000124795.10	DEK	0.23183	0.00067284
ENSG00000165181.12	C9orf84	-0.611256	0.00068142
ENSG00000180354.11	C7orf41	-0.299615	0.000681773
ENSG00000178425.9	NT5DC1	0.340921	0.000682297
ENSG00000130748.6	TMEM160	0.258205	0.000685359
ENSG00000179271.1	GADD45GIP1	0.226532	0.000685502
ENSG00000125977.6	EIF2S2	0.184454	0.000690985
ENSG00000085999.7	RAD54L	0.191708	0.000691135
ENSG00000080986.8	NDC80	0.193466	0.000691966
ENSG00000105968.14	H2AFV	0.156195	0.000691966
ENSG00000263264.1	CTB-133G6.1	0.197949	0.000696044
ENSG00000104783.7	KCNN4	-0.209739	0.000702544
ENSG00000067167.3	TRAM1	0.218608	0.00071968
ENSG00000189057.6	FAM111B	0.49769	0.000720871
ENSG00000115306.11	SPTBN1	0.42467	0.000724883
ENSG00000238113.2	RP11-262H14.1	-0.232362	0.000727243
ENSG00000120253.9	NUP43	0.180186	0.0007358
ENSG00000110107.4	PRPF19	0.175061	0.0007358
ENSG00000197905.4	TEAD4	0.647955	0.000736901
ENSG00000134330.14	IAH1	0.254213	0.000737191
ENSG00000237075.4	RP11-497H16.2	-0.481382	0.00073902
ENSG00000163902.7	RPN1	0.158781	0.000739054
ENSG00000259116.1	RP11-973N13.4	-0.58599	0.000739243
ENSG00000197134.7	ZNF257	0.763807	0.000739243
ENSG00000106153.12	CHCHD2	0.194906	0.000744835
ENSG00000130707.13	ASS1	0.201271	0.000745772
ENSG00000144354.9	CDCA7	0.140695	0.000745772
ENSG00000253522.2	MIR146A	-0.582679	0.000745772
ENSG00000170291.10	ELP5	0.193988	0.000752414
ENSG00000129003.11	VPS13C	-0.175005	0.000753317
ENSG00000166598.8	HSP90B1	0.156866	0.000762032
ENSG00000241261.1	RPL17P19	-0.614378	0.000766919
ENSG00000127507.13	EMR2	-0.145481	0.000784202
ENSG00000089220.4	PEBP1	0.156441	0.000784202
ENSG00000078814.11	MYH7B	-0.296798	0.000786458
ENSG00000105193.4	RPS16	0.212925	0.000795712
ENSG00000160789.15	LMNA	-0.18606	0.000795925
ENSG00000130517.9	PGPEP1	-0.166352	0.000804545
ENSG00000197043.9	ANXA6	0.161638	0.000804832
ENSG00000128016.4	ZFP36	0.203054	0.000806188
ENSG00000139343.6	SNRPF	0.225921	0.000808019
ENSG00000230989.2	HSBP1	0.175578	0.000810316
ENSG00000135127.7	CCDC64	0.201833	0.000810316
ENSG00000160877.5	NACC1	0.178903	0.000814374
ENSG00000167775.6	CD320	0.208781	0.000815304
ENSG00000116514.12	RNF19B	-0.23474	0.000826941
ENSG00000260001.2	TGFBR3L	0.514706	0.000830215
ENSG00000163110.10	PDLIM5	0.232498	0.00083196
ENSG00000182950.2	ODF3L1	-0.457699	0.00083196
ENSG00000173457.6	PPP1R14B	0.212151	0.00083196
ENSG00000171824.9	EXOSC10	0.161511	0.000832578
ENSG00000140105.13	WARS	0.170113	0.000835106
ENSG00000134627.7	PIWIL4	-0.144104	0.000838479
ENSG00000074966.6	TXK	-0.361853	0.000852947
ENSG00000165283.11	STOML2	0.17314	0.000858505
ENSG00000129450.4	SIGLEC9	-0.775579	0.000860638
ENSG00000135446.12	CDK4	0.194298	0.000863155
ENSG00000006831.9	ADIPOR2	0.143804	0.000866913
ENSG00000108055.9	SMC3	0.156848	0.000871743
ENSG00000110925.2	CSRNP2	-0.211388	0.000879022
ENSG00000142634.8	EFHD2	0.169592	0.000879022
ENSG00000171530.9	TBCA	0.198566	0.000885434
ENSG00000113456.14	RAD1	0.199803	0.000885461
ENSG00000121211.3	MND1	0.259761	0.000889303
ENSG00000110079.12	MS4A4A	0.285514	0.000889303
ENSG00000139645.9	ANKRD52	0.159185	0.000890221
ENSG00000145555.10	MYO10	-0.143736	0.000891646
ENSG00000213585.6	VDAC1	0.159097	0.000901759
ENSG00000228594.1	C1orf233	0.263454	0.000902703
ENSG00000099800.3	TIMM13	0.182688	0.000908873
ENSG00000105854.8	PON2	-0.302564	0.000913237
ENSG00000177150.8	FAM210A	0.201406	0.000923346
ENSG00000109805.5	NCAPG	0.163289	0.000925047
ENSG00000107672.10	NSMCE4A	0.172632	0.000926144
ENSG00000176208.4	ATAD5	0.198658	0.000926144
ENSG00000108262.11	GIT1	0.153591	0.000934664
ENSG00000162849.11	KIF26B	-0.294639	0.000941982
ENSG00000087088.15	BAX	-0.192088	0.000950561
ENSG00000178988.10	MRFAP1L1	0.241484	0.000970526
ENSG00000047597.5	XK	0.476484	0.000970526
ENSG00000131467.6	PSME3	0.159974	0.000978527
ENSG00000120699.8	EXOSC8	0.20148	0.00098018
ENSG00000071626.12	DAZAP1	0.133944	0.000998838
ENSG00000114405.6	C3orf14	0.270198	0.00100603
ENSG00000152229.14	PSTPIP2	-0.162861	0.00100785
ENSG00000140526.12	ABHD2	0.150943	0.00101031
ENSG00000103811.11	CTSH	-0.276572	0.00101813
ENSG00000177465.4	ACOT4	0.63952	0.00104046
ENSG00000125450.6	NUP85	0.168224	0.00104173
ENSG00000144401.10	METTL21A	0.195607	0.00105844
ENSG00000173542.4	MOB1B	-0.228182	0.00106156
ENSG00000197603.9	C5orf42	-0.24841	0.00106848
ENSG00000095380.10	NANS	0.17746	0.00107313
ENSG00000205293.3	RP11-1112C15.1	0.55699	0.00107495
ENSG00000055044.6	NOP58	0.154444	0.00109323
ENSG00000096063.10	SRPK1	0.147887	0.00109623
ENSG00000143486.11	EIF2D	0.185013	0.0011038
ENSG00000215021.4	PHB2	0.160552	0.0011052
ENSG00000125520.9	SLC2A4RG	0.19441	0.00110653
ENSG00000101407.8	TTI1	0.158574	0.00110671
ENSG00000198546.10	ZNF511	0.240014	0.00110671
ENSG00000058091.12	CDK14	0.363599	0.00110973
ENSG00000106268.11	NUDT1	0.209748	0.00111191
ENSG00000196976.5	LAGE3	0.21576	0.00111511
ENSG00000169397.3	RNASE3	0.256895	0.00112478
ENSG00000151474.15	FRMD4A	-0.248542	0.00112581
ENSG00000173141.4	MRP63	0.201723	0.00113955
ENSG00000103485.13	QPRT	-0.264957	0.00114586
ENSG00000198937.8	CCDC167	0.288802	0.00114586
ENSG00000146263.7	MMS22L	0.175849	0.00115174
ENSG00000112651.7	MRPL2	0.191199	0.00115181
ENSG00000257654.1	RP11-497G19.2	-0.229928	0.00117137
ENSG00000154217.10	PITPNC1	-0.20187	0.00117137
ENSG00000145936.4	KCNMB1	-0.463856	0.00117316
ENSG00000253878.1	RP11-347C18.3	-0.510493	0.00117316
ENSG00000187210.8	GCNT1	-0.170369	0.00117475
ENSG00000082898.12	XPO1	0.161564	0.00118155
ENSG00000166197.12	NOLC1	0.152869	0.00118252
ENSG00000125869.5	LAMP5	-0.126768	0.00118926
ENSG00000145819.11	ARHGAP26	-0.143269	0.00119679
ENSG00000183814.11	LIN9	0.244543	0.00120625
ENSG00000122068.8	FYTTD1	0.165447	0.00120655
ENSG00000075856.7	SART3	0.151929	0.00121227
ENSG00000162385.6	MAGOH	0.207093	0.00121227
ENSG00000112208.10	BAG2	0.203311	0.00121227
ENSG00000132773.7	TOE1	0.241618	0.00123048
ENSG00000100504.12	PYGL	-0.148344	0.00124214
ENSG00000089280.14	FUS	0.153782	0.00124291
ENSG00000105486.9	LIG1	0.148147	0.00124291
ENSG00000125319.10	C17orf53	0.234723	0.00124386
ENSG00000088247.11	KHSRP	0.148057	0.00124386
ENSG00000105171.5	POP4	0.168919	0.00124816
ENSG00000172349.12	IL16	-0.198585	0.00125294
ENSG00000100591.3	AHSA1	0.15905	0.00126479
ENSG00000146858.7	ZC3HAV1L	0.223516	0.00128069
ENSG00000172009.10	THOP1	0.18681	0.00128101
ENSG00000152527.9	PLEKHH2	-0.355645	0.00129983
ENSG00000100941.4	PNN	0.121474	0.00129989
ENSG00000231007.4	CDC20P1	0.516231	0.00131101
ENSG00000116120.8	FARSB	0.156512	0.00131485
ENSG00000072501.13	SMC1A	0.155292	0.001338
ENSG00000213551.4	DNAJC9	0.211982	0.00134474
ENSG00000196419.8	XRCC6	0.152706	0.00134474
ENSG00000197471.7	SPN	0.13054	0.00134607
ENSG00000125817.7	CENPB	0.195427	0.00134754
ENSG00000154027.14	AK5	-0.335313	0.0013605
ENSG00000180817.7	PPA1	0.186724	0.00137467
ENSG00000108950.7	FAM20A	-0.46829	0.00138976
ENSG00000128595.12	CALU	0.150756	0.00139062
ENSG00000145730.16	PAM	0.271809	0.00139471
ENSG00000170502.8	NUDT9	0.239064	0.00139471
ENSG00000106554.7	CHCHD3	0.14845	0.00139596
ENSG00000187764.7	SEMA4D	-0.148153	0.00140065
ENSG00000181163.9	NPM1	0.185423	0.00140415
ENSG00000120948.11	TARDBP	0.135234	0.00140692
ENSG00000205531.8	NAP1L4	0.132093	0.00140692
ENSG00000105323.12	HNRNPUL1	0.145058	0.00141749
ENSG00000105926.11	MPP6	0.211825	0.00143306
ENSG00000107731.8	UNC5B	-0.480332	0.00143569
ENSG00000203852.3	HIST2H3A	0.742085	0.00143796
ENSG00000184216.7	IRAK1	0.160729	0.00143966
ENSG00000207110.1	RNU1-106P	-0.40577	0.00144051
ENSG00000077514.4	POLD3	0.155317	0.00145377
ENSG00000100003.13	SEC14L2	-0.299586	0.0014606
ENSG00000106853.12	PTGR1	0.249667	0.00146434
ENSG00000121297.6	TSHZ3	-0.224626	0.00146434
ENSG00000137288.5	UQCC2	0.192606	0.00148334
ENSG00000136492.4	BRIP1	0.166808	0.00148334
ENSG00000172301.6	COPRS	0.272248	0.00148997
ENSG00000181991.11	MRPS11	0.192899	0.00148997
ENSG00000259202.1	RP11-342M21.2	-0.687113	0.0014905
ENSG00000173638.14	SLC19A1	0.194917	0.0014912
ENSG00000123545.5	NDUFAF4	0.216314	0.00149281
ENSG00000236383.3	LINC00854	-0.257735	0.0015051
ENSG00000144711.9	IQSEC1	-0.18533	0.0015051
ENSG00000187990.4	HIST1H2BG	0.224205	0.0015065
ENSG00000173846.8	PLK3	-0.238287	0.0015065
ENSG00000188312.9	CENPP	0.186256	0.0015065
ENSG00000100564.4	PIGH	0.255955	0.00152373
ENSG00000154518.5	ATP5G3	0.176917	0.00152507
ENSG00000055130.11	CUL1	0.162891	0.00152507
ENSG00000110717.6	NDUFS8	0.201656	0.00153454
ENSG00000184293.3	CLECL1	-0.206913	0.00153782
ENSG00000059573.4	ALDH18A1	0.151925	0.00154253
ENSG00000163563.7	MNDA	0.341646	0.00157416
ENSG00000107949.12	BCCIP	0.179661	0.00157982
ENSG00000083093.5	PALB2	0.165364	0.00158558
ENSG00000105677.7	TMEM147	0.207521	0.00158847
ENSG00000118418.10	HMGN3	0.224258	0.00160162
ENSG00000250510.3	GPR162	-0.629583	0.00160277
ENSG00000124541.6	RRP36	0.177619	0.00160365
ENSG00000006634.3	DBF4	0.2187	0.00160866
ENSG00000173915.8	USMG5	0.215584	0.00161328
ENSG00000065150.14	IPO5	0.147967	0.00161488
ENSG00000118640.6	VAMP8	0.183324	0.00161488
ENSG00000143977.9	SNRPG	0.202946	0.00162808
ENSG00000154265.11	ABCA5	0.328233	0.00163356
ENSG00000245680.5	ZNF585B	-0.173611	0.00164056
ENSG00000110077.10	MS4A6A	0.172775	0.00164706
ENSG00000159199.9	ATP5G1	0.196253	0.00164828
ENSG00000125743.6	SNRPD2	0.187031	0.00164993
ENSG00000223511.1	RP13-297E16.4	-0.753869	0.00165827
ENSG00000175581.9	MRPL48	0.183604	0.00168265
ENSG00000272908.1	RP11-121A8.1	-0.287756	0.00170426
ENSG00000163528.8	CHCHD4	0.212059	0.00170522
ENSG00000141384.7	TAF4B	0.170224	0.00170522
ENSG00000186575.13	NF2	0.147697	0.00170907
ENSG00000171208.5	NETO2	0.166092	0.00171747
ENSG00000080819.2	CPOX	-0.182914	0.00172473
ENSG00000197081.8	IGF2R	-0.133231	0.00173903
ENSG00000155307.13	SAMSN1	-0.50481	0.00174311
ENSG00000153574.8	RPIA	0.186188	0.00174977
ENSG00000146376.6	ARHGAP18	-0.170339	0.00175312
ENSG00000136463.7	TACO1	0.189571	0.00177134
ENSG00000114268.7	PFKFB4	-0.273959	0.00178793
ENSG00000151650.7	VENTX	-0.236758	0.00179765
ENSG00000135218.13	CD36	-0.21128	0.00179765
ENSG00000176595.3	KBTBD11	0.12708	0.00182077
ENSG00000084207.11	GSTP1	0.174449	0.00182494
ENSG00000110958.11	PTGES3	0.178612	0.0018272
ENSG00000197785.9	ATAD3A	0.185168	0.00183574
ENSG00000101361.10	NOP56	0.159731	0.00184321
ENSG00000119655.4	NPC2	0.227293	0.00184615
ENSG00000118193.7	KIF14	0.181254	0.00186292
ENSG00000084774.9	CAD	0.152463	0.00186292
ENSG00000137312.10	FLOT1	0.245884	0.00186292
ENSG00000204356.7	NELFE	0.193228	0.00186292
ENSG00000124813.16	RUNX2	0.131638	0.00188392
ENSG00000180573.8	HIST1H2AC	0.231007	0.0018982
ENSG00000107104.14	KANK1	0.228934	0.0018982
ENSG00000187164.13	KIAA1598	-0.192979	0.00190311
ENSG00000077312.4	SNRPA	0.154019	0.00191063
ENSG00000242588.2	RP11-274B21.1	-0.175629	0.00191063
ENSG00000051620.6	HEBP2	0.182513	0.00191449
ENSG00000132718.7	SYT11	-0.441401	0.00194245
ENSG00000184574.5	LPAR5	-0.467015	0.00194245
ENSG00000167112.7	TRUB2	0.163758	0.00194275
ENSG00000180104.11	EXOC3	-0.13762	0.00195063
ENSG00000171497.4	PPID	0.194512	0.00195063
ENSG00000247157.2	RP11-434C1.1	-0.596173	0.00195281
ENSG00000197779.9	ZNF81	-0.220965	0.00195702
ENSG00000111666.6	CHPT1	0.456872	0.00195968
ENSG00000135913.6	USP37	0.154615	0.00195968
ENSG00000167005.9	NUDT21	0.173481	0.00195968
ENSG00000051341.9	POLQ	0.147611	0.00195968
ENSG00000138166.5	DUSP5	0.469474	0.00196176
ENSG00000168769.8	TET2	-0.141926	0.00199796
ENSG00000136770.6	DNAJC1	0.258213	0.00199883
ENSG00000119943.6	PYROXD2	-0.37543	0.00201238
ENSG00000106484.10	MEST	0.296163	0.00202048
ENSG00000157212.14	PAXIP1	0.146256	0.00202536
ENSG00000065978.13	YBX1	0.149605	0.00203132
ENSG00000124789.7	NUP153	0.131578	0.00203132
ENSG00000169252.4	ADRB2	-0.226694	0.00204412
ENSG00000189403.10	HMGB1	0.192805	0.00204412
ENSG00000147592.4	LACTB2	0.324261	0.00206357
ENSG00000117899.6	MESDC2	0.18098	0.00206576
ENSG00000171766.11	GATM	0.24269	0.00207079
ENSG00000074695.5	LMAN1	0.172218	0.00207445
ENSG00000221890.2	NPTXR	-0.479688	0.00207795
ENSG00000176101.7	SSNA1	0.238948	0.00207895
ENSG00000137411.12	VARS2	0.20023	0.00208311
ENSG00000156876.8	SASS6	0.203694	0.00208887
ENSG00000196363.5	WDR5	0.143136	0.00208931
ENSG00000143851.11	PTPN7	0.150634	0.00209755
ENSG00000096433.6	ITPR3	0.276213	0.00209755
ENSG00000012660.9	ELOVL5	0.151424	0.00211223
ENSG00000072506.8	HSD17B10	0.195542	0.0021208
ENSG00000225345.3	SNX18P3	-0.281645	0.00212807
ENSG00000131148.4	EMC8	0.167173	0.00213714
ENSG00000226939.1	AC062021.1	-0.466117	0.00214472
ENSG00000109390.7	NDUFC1	0.210529	0.0021505
ENSG00000171724.2	VAT1L	-0.232888	0.00215994
ENSG00000110448.6	CD5	-0.440157	0.00216106
ENSG00000180596.7	HIST1H2BC	0.344457	0.00217259
ENSG00000169021.4	UQCRFS1	0.158958	0.00221308
ENSG00000169976.5	SF3B5	0.203434	0.00221308
ENSG00000160117.10	ANKLE1	0.165203	0.00221409
ENSG00000135048.9	TMEM2	-0.274542	0.00222547
ENSG00000139168.3	ZCRB1	0.21307	0.00223529
ENSG00000143401.10	ANP32E	0.191023	0.00223529
ENSG00000089916.13	GPATCH2L	-0.128647	0.00223926
ENSG00000167676.3	PLIN4	-0.346119	0.00224936
ENSG00000104679.6	R3HCC1	0.177602	0.00227178
ENSG00000137822.8	TUBGCP4	0.133799	0.0022784
ENSG00000004142.7	POLDIP2	0.164665	0.00228623
ENSG00000140263.9	SORD	0.154796	0.00229234
ENSG00000156398.8	SFXN2	0.177337	0.0023043
ENSG00000014914.15	MTMR11	-0.214458	0.0023215
ENSG00000104472.5	CHRAC1	0.155738	0.00234421
ENSG00000182054.5	IDH2	0.145558	0.00234928
ENSG00000154822.11	PLCL2	0.615648	0.002361
ENSG00000254521.2	SIGLEC12	0.18444	0.00236174
ENSG00000058668.10	ATP2B4	0.131704	0.00237783
ENSG00000138780.10	GSTCD	0.209152	0.00237783
ENSG00000257315.1	ZBED6	-0.185496	0.00237948
ENSG00000018610.9	CXorf56	0.213537	0.00242705
ENSG00000153898.8	MCOLN2	0.292078	0.00242784
ENSG00000186088.11	GSAP	-0.197498	0.00244955
ENSG00000064102.10	ASUN	0.181543	0.00244955
ENSG00000147251.11	DOCK11	-0.123845	0.00245704
ENSG00000246705.3	H2AFJ	0.245142	0.00246309
ENSG00000125966.8	MMP24	-0.231646	0.00246414
ENSG00000101856.8	PGRMC1	0.224385	0.00248443
ENSG00000180385.4	AC034193.5	0.191473	0.002513
ENSG00000112592.8	TBP	0.183195	0.00251872
ENSG00000092201.5	SUPT16H	0.126477	0.00253783
ENSG00000123933.10	MXD4	-0.191295	0.00254081
ENSG00000250565.2	ATP6V1E2	0.384446	0.00254081
ENSG00000084463.3	WBP11	0.141176	0.00254403
ENSG00000065268.6	WDR18	0.208914	0.00255386
ENSG00000144867.7	SRPRB	0.156128	0.00255788
ENSG00000102780.12	DGKH	-0.194304	0.00255941
ENSG00000136982.5	DSCC1	0.192933	0.0025643
ENSG00000235776.2	AC000089.3	-0.313222	0.00259188
ENSG00000140157.10	NIPA2	0.165957	0.00259574
ENSG00000238164.2	RP3-395M20.8	-0.405782	0.00259843
ENSG00000184840.7	TMED9	0.169525	0.00260709
ENSG00000271529.1	CICP14	-0.203268	0.00260974
ENSG00000122861.11	PLAU	-0.162009	0.00261913
ENSG00000163113.10	OTUD7B	0.229262	0.00262229
ENSG00000125166.8	GOT2	0.156582	0.00263203
ENSG00000119397.12	CNTRL	-0.12869	0.00263862
ENSG00000103275.14	UBE2I	0.137214	0.00264093
ENSG00000183011.9	LSMD1	0.224268	0.00264337
ENSG00000111786.4	SRSF9	0.13463	0.00265077
ENSG00000256043.2	CTSO	-0.283684	0.00265846
ENSG00000138346.10	DNA2	0.173458	0.00266058
ENSG00000093000.14	NUP50	0.142488	0.00266058
ENSG00000135372.4	NAT10	0.145217	0.00266058
ENSG00000100836.6	PABPN1	0.147839	0.00266136
ENSG00000109685.13	WHSC1	0.123454	0.00266715
ENSG00000154832.10	CXXC1	0.176023	0.00266807
ENSG00000136122.11	BORA	0.189302	0.00267166
ENSG00000265298.1	RP13-104F24.3	-0.438386	0.00267365
ENSG00000082781.7	ITGB5	0.536256	0.00267863
ENSG00000134824.9	FADS2	0.197914	0.00267994
ENSG00000094880.6	CDC23	0.160941	0.00267994
ENSG00000175701.6	LINC00116	0.306131	0.00269601
ENSG00000147874.6	HAUS6	0.152386	0.00273955
ENSG00000035115.17	SH3YL1	-0.164653	0.00275803
ENSG00000107745.12	MICU1	0.158411	0.00275803
ENSG00000198417.5	MT1F	0.225776	0.00275803
ENSG00000062485.14	CS	0.138293	0.00275803
ENSG00000119383.15	PPP2R4	0.167618	0.00275803
ENSG00000188177.9	ZC3H6	-0.204938	0.00275803
ENSG00000196155.8	PLEKHG4	0.162146	0.00276256
ENSG00000130332.10	LSM7	0.162586	0.00276953
ENSG00000105186.10	ANKRD27	0.126836	0.00277348
ENSG00000057252.8	SOAT1	0.208077	0.00277348
ENSG00000104442.5	ARMC1	0.189008	0.00279606
ENSG00000139209.11	SLC38A4	-0.634932	0.00280344
ENSG00000151725.7	MLF1IP	0.188056	0.00280344
ENSG00000206527.5	PTPLB	0.212565	0.00280856
ENSG00000251432.2	RP11-420A23.1	-0.38794	0.00281023
ENSG00000127585.7	FBXL16	-0.506382	0.00282909
ENSG00000070915.5	SLC12A3	0.456976	0.00282909
ENSG00000114841.13	DNAH1	-0.167847	0.00282909
ENSG00000060688.8	SNRNP40	0.145474	0.00283483
ENSG00000155858.5	LSM11	0.219803	0.00283483
ENSG00000088298.8	EDEM2	0.19153	0.0028417
ENSG00000143369.10	ECM1	-0.280209	0.00285706
ENSG00000109320.7	NFKB1	-0.152226	0.00286193
ENSG00000154920.10	EME1	0.228321	0.00286767
ENSG00000183605.12	SFXN4	0.150075	0.00288697
ENSG00000074842.3	C19orf10	0.182481	0.0028888
ENSG00000179041.2	RRS1	0.149734	0.00289649
ENSG00000223745.3	RP4-717I23.3	-0.200994	0.0028989
ENSG00000184260.4	HIST2H2AC	0.209707	0.00290675
ENSG00000214706.6	IFRD2	0.182288	0.00290757
ENSG00000174442.7	ZWILCH	0.23152	0.00291166
ENSG00000116350.11	SRSF4	0.123303	0.00291475
ENSG00000196756.7	SNHG17	0.174205	0.00291483
ENSG00000102172.11	SMS	0.156102	0.00293197
ENSG00000121691.4	CAT	-0.131441	0.00295067
ENSG00000258727.1	RP11-66N24.3	-0.460841	0.00295465
ENSG00000136280.11	CCM2	-0.169741	0.00295749
ENSG00000175376.4	EIF1AD	0.167023	0.00297129
ENSG00000134825.9	TMEM258	0.196298	0.00297129
ENSG00000133561.11	GIMAP6	-0.238114	0.00297129
ENSG00000143633.8	C1orf131	0.194623	0.00301212
ENSG00000181788.3	SIAH2	0.188537	0.00301745
ENSG00000265218.1	RP11-927P21.1	-0.329768	0.00302557
ENSG00000099814.11	CEP170B	-0.24422	0.0030267
ENSG00000102007.6	PLP2	0.179776	0.00305065
ENSG00000167088.6	SNRPD1	0.191612	0.00307334
ENSG00000080709.10	KCNN2	0.125429	0.00307449
ENSG00000182628.8	SKA2	0.187021	0.00309703
ENSG00000100258.13	LMF2	0.179083	0.00311438
ENSG00000113407.9	TARS	0.17317	0.00311438
ENSG00000126267.4	COX6B1	0.186402	0.00311526
ENSG00000121957.8	GPSM2	0.16668	0.00311526
ENSG00000125534.5	PPDPF	0.200156	0.00311633
ENSG00000023041.7	ZDHHC6	0.177078	0.00315217
ENSG00000221176.1	MIR1207	-0.614225	0.00315667
ENSG00000256663.1	RP11-424C20.2	0.22542	0.0031856
ENSG00000170464.5	DNAJC18	-0.342498	0.0031971
ENSG00000141682.11	PMAIP1	0.259145	0.00320265
ENSG00000189159.11	HN1	0.172712	0.00320265
ENSG00000179115.6	FARSA	0.155498	0.00321834
ENSG00000170776.15	AKAP13	-0.134186	0.00321834
ENSG00000083838.11	ZNF446	-0.191768	0.00321834
ENSG00000092621.7	PHGDH	0.404194	0.00321834
ENSG00000158402.14	CDC25C	0.208221	0.00321834
ENSG00000115317.7	HTRA2	0.198891	0.00321834
ENSG00000095906.12	NUBP2	0.161358	0.0032191
ENSG00000066044.9	ELAVL1	0.140168	0.00323042
ENSG00000138796.11	HADH	0.166871	0.00323225
ENSG00000119616.7	FCF1	0.170565	0.00323452
ENSG00000051523.6	CYBA	0.183138	0.00323685
ENSG00000087842.6	PIR	0.500884	0.0032883
ENSG00000124155.12	PIGT	0.154447	0.00332693
ENSG00000168615.7	ADAM9	0.198588	0.00332996
ENSG00000132749.6	MTL5	-0.200281	0.00334373
ENSG00000188641.8	DPYD	-0.154035	0.00334373
ENSG00000167107.8	ACSF2	-0.260707	0.00334373
ENSG00000177971.7	IMP3	0.172909	0.00334373
ENSG00000196975.10	ANXA4	-0.159793	0.00334844
ENSG00000141499.12	WRAP53	0.214879	0.00335923
ENSG00000140406.2	MESDC1	0.223434	0.00335923
ENSG00000127415.8	IDUA	-0.249723	0.00336643
ENSG00000001497.12	LAS1L	0.135982	0.00337818
ENSG00000026025.9	VIM	-0.15497	0.00337818
ENSG00000100216.4	TOMM22	0.158832	0.00337818
ENSG00000087086.9	FTL	0.159763	0.00337982
ENSG00000135486.13	HNRNPA1	0.131755	0.00337982
ENSG00000039319.12	ZFYVE16	-0.201818	0.0033925
ENSG00000047849.17	MAP4	0.126844	0.00341863
ENSG00000119242.4	CCDC92	-0.302893	0.00341863
ENSG00000101811.9	CSTF2	0.195995	0.00342022
ENSG00000185347.13	C14orf80	0.232698	0.00342514
ENSG00000074071.9	MRPS34	0.178272	0.00342514
ENSG00000151458.7	ANKRD50	-0.199884	0.00342748
ENSG00000131174.4	COX7B	0.199672	0.00342748
ENSG00000198168.4	SVIP	0.344951	0.00345071
ENSG00000111196.5	MAGOHB	0.179449	0.0034512
ENSG00000072786.8	STK10	-0.153264	0.00345541
ENSG00000197635.5	DPP4	0.44754	0.00345602
ENSG00000126091.15	ST3GAL3	-0.149078	0.00346523
ENSG00000130779.15	CLIP1	-0.139911	0.00348337
ENSG00000164604.8	GPR85	-0.226448	0.00348573
ENSG00000172175.8	MALT1	0.230626	0.00348822
ENSG00000176619.6	LMNB2	0.175371	0.00348822
ENSG00000141140.12	MYO19	0.148599	0.00349744
ENSG00000112877.6	CEP72	0.198284	0.00349744
ENSG00000064547.9	LPAR2	-0.194104	0.00354695
ENSG00000163362.6	C1orf106	0.234597	0.00362951
ENSG00000100243.16	CYB5R3	0.182504	0.00367644
ENSG00000101158.8	NELFCD	0.126189	0.00367644
ENSG00000185608.4	MRPL40	0.1931	0.00367735
ENSG00000169188.4	APEX2	0.163527	0.00367967
ENSG00000113048.12	MRPS27	0.135616	0.00368828
ENSG00000182179.6	UBA7	-0.16559	0.0036914
ENSG00000173208.3	ABCD2	0.220778	0.0036914
ENSG00000203326.5	ZNF525	0.476369	0.0036914
ENSG00000176225.8	RTTN	0.162718	0.0036914
ENSG00000184897.4	H1FX	0.218914	0.0036914
ENSG00000155115.6	GTF3C6	0.185291	0.0036914
ENSG00000197728.5	RPS26	0.182223	0.0036914
ENSG00000167515.6	TRAPPC2L	0.187186	0.0036914
ENSG00000160307.5	S100B	-0.709228	0.00369519
ENSG00000141759.10	TXNL4A	0.164152	0.00370122
ENSG00000196663.11	TECPR2	-0.198783	0.00372884
ENSG00000234127.4	TRIM26	0.190281	0.00372884
ENSG00000018699.7	TTC27	0.147402	0.00374039
ENSG00000259431.1	THTPA	-0.264275	0.00374451
ENSG00000125144.9	MT1G	0.205292	0.00377842
ENSG00000100908.9	EMC9	0.259057	0.00377995
ENSG00000006744.14	ELAC2	0.142792	0.00379005
ENSG00000183929.6	DUSP5P1	0.338138	0.0037906
ENSG00000106211.8	HSPB1	0.216931	0.00381471
ENSG00000213967.6	ZNF726	0.446314	0.00381471
ENSG00000141574.3	SECTM1	-0.415898	0.00381471
ENSG00000261324.2	RP11-174G6.5	-0.425284	0.00381471
ENSG00000173674.6	EIF1AX	0.180729	0.00381597
ENSG00000101246.15	ARFRP1	0.181195	0.00382253
ENSG00000241886.1	RP11-242C19.2	-0.468561	0.00382253
ENSG00000234084.1	RP3-388E23.2	-0.708533	0.00382385
ENSG00000138764.9	CCNG2	-0.231843	0.00382436
ENSG00000086300.11	SNX10	0.408135	0.00382459
ENSG00000117748.5	RPA2	0.168299	0.00382592
ENSG00000057757.5	PITHD1	0.173236	0.00382592
ENSG00000140743.3	CDR2	0.217231	0.00382865
ENSG00000113328.14	CCNG1	-0.187484	0.00383415
ENSG00000255790.1	RP11-711K1.7	-0.705027	0.00383756
ENSG00000154723.8	ATP5J	0.166179	0.00383756
ENSG00000011426.6	ANLN	0.135929	0.00384723
ENSG00000164172.14	MOCS2	0.237411	0.00384945
ENSG00000154874.10	CCDC144B	-0.190156	0.00384964
ENSG00000167977.4	KCTD5	0.144157	0.00386629
ENSG00000155506.12	LARP1	0.118084	0.00388099
ENSG00000123836.10	PFKFB2	-0.230372	0.00388408
ENSG00000076662.5	ICAM3	0.248465	0.00390526
ENSG00000004399.8	PLXND1	-0.157602	0.00390567
ENSG00000143162.7	CREG1	0.156666	0.00392292
ENSG00000108272.9	DHRS11	0.261158	0.00394001
ENSG00000140848.12	CPNE2	0.2117	0.00394001
ENSG00000183624.9	HMCES	0.20948	0.00394001
ENSG00000086598.6	TMED2	0.177305	0.00394001
ENSG00000185651.10	UBE2L3	0.158936	0.00395134
ENSG00000255717.2	SNHG1	0.157092	0.0039693
ENSG00000168734.9	PKIG	-0.43757	0.00397394
ENSG00000091592.11	NLRP1	-0.196559	0.00397429
ENSG00000137547.4	MRPL15	0.18151	0.00399388
ENSG00000134453.11	RBM17	0.137707	0.00400415
ENSG00000198712.1	MT-CO2	0.18061	0.00400779
ENSG00000167468.12	GPX4	0.172233	0.00401211
ENSG00000010327.6	STAB1	-0.645018	0.00405594
ENSG00000229989.3	MIR181A1HG	-0.17959	0.00405685
ENSG00000162441.7	LZIC	0.210203	0.00405685
ENSG00000157778.4	PSMG3	0.214376	0.00405685
ENSG00000174885.8	NLRP6	0.242784	0.00405896
ENSG00000177335.6	C8orf31	-0.416431	0.00407412
ENSG00000147155.6	EBP	0.201509	0.00408522
ENSG00000134905.12	CARS2	0.137259	0.00409059
ENSG00000147649.5	MTDH	0.121482	0.00409072
ENSG00000100422.9	CERK	0.135716	0.00409517
ENSG00000120675.4	DNAJC15	0.259424	0.00409517
ENSG00000180992.5	MRPL14	0.206853	0.00409517
ENSG00000134256.8	CD101	-0.296938	0.00409517
ENSG00000172172.3	MRPL13	0.189772	0.00409517
ENSG00000125901.5	MRPS26	0.201746	0.00412598
ENSG00000072571.15	HMMR	0.173784	0.00412598
ENSG00000154582.12	TCEB1	0.1779	0.00413187
ENSG00000257151.1	PWAR6	-0.246081	0.00413846
ENSG00000189091.8	SF3B3	0.120817	0.00415124
ENSG00000107566.9	ERLIN1	0.123679	0.00416923
ENSG00000203760.4	CENPW	0.208017	0.0041727
ENSG00000134910.8	STT3A	0.139368	0.00419524
ENSG00000102054.13	RBBP7	0.154455	0.00419524
ENSG00000070061.10	IKBKAP	0.128223	0.00420223
ENSG00000196532.4	HIST1H3C	0.339626	0.00422059
ENSG00000136819.10	C9orf78	0.156542	0.0042263
ENSG00000083828.11	ZNF586	-0.169865	0.00422889
ENSG00000082516.8	GEMIN5	0.138838	0.00422944
ENSG00000168476.7	REEP4	0.170551	0.00424881
ENSG00000109667.7	SLC2A9	-0.171618	0.00425452
ENSG00000198169.4	ZNF251	-0.176332	0.00425553
ENSG00000102898.7	NUTF2	0.156287	0.00425553
ENSG00000271430.1	RP3-368A4.5	-0.262505	0.0042764
ENSG00000162923.10	WDR26	-0.12217	0.00432192
ENSG00000205981.2	DNAJC19	0.21463	0.00432571
ENSG00000184635.9	ZNF93	0.178105	0.00434064
ENSG00000164346.5	NSA2	0.194943	0.00434064
ENSG00000100104.8	SRRD	0.177365	0.00436296
ENSG00000151376.12	ME3	-0.250186	0.00436296
ENSG00000213046.4	EEF1A1P32	-0.451727	0.00437782
ENSG00000144647.5	POMGNT2	0.362835	0.00439489
ENSG00000002549.8	LAP3	0.132719	0.00441114
ENSG00000131508.11	UBE2D2	0.14142	0.00442253
ENSG00000106459.10	NRF1	0.162712	0.00445192
ENSG00000175334.3	BANF1	0.174725	0.00446597
ENSG00000134697.8	GNL2	0.13427	0.00447791
ENSG00000128394.12	APOBEC3F	-0.48961	0.00447791
ENSG00000005961.13	ITGA2B	-0.462326	0.00449385
ENSG00000139354.6	GAS2L3	0.211115	0.00450867
ENSG00000198520.6	C1orf228	-0.161965	0.00451019
ENSG00000198886.2	MT-ND4	0.151152	0.00454103
ENSG00000142856.12	ITGB3BP	0.201427	0.0045549
ENSG00000066084.8	DIP2B	-0.128142	0.00455878
ENSG00000166582.5	CENPV	0.168166	0.0045686
ENSG00000188610.8	FAM72B	0.245843	0.00458612
ENSG00000114346.9	ECT2	0.162156	0.00458633
ENSG00000166432.10	ZMAT1	-0.248626	0.00459753
ENSG00000109881.12	CCDC34	0.233121	0.00459753
ENSG00000152082.9	MZT2B	0.231685	0.00461249
ENSG00000173272.9	MZT2A	0.215927	0.00461545
ENSG00000204977.5	TRIM13	-0.130834	0.00467155
ENSG00000080839.7	RBL1	0.149536	0.00467155
ENSG00000264364.2	DYNLL2	0.150849	0.00468158
ENSG00000185088.8	RPS27L	-0.201845	0.00468847
ENSG00000270143.1	AC004257.3	0.536583	0.00472941
ENSG00000121073.9	SLC35B1	0.167417	0.00472941
ENSG00000143621.12	ILF2	0.148332	0.00472941
ENSG00000183648.5	NDUFB1	0.197224	0.00473102
ENSG00000136861.13	CDK5RAP2	0.118669	0.00474963
ENSG00000258168.1	RP11-588H23.3	-0.260508	0.00474963
ENSG00000214022.7	REPIN1	0.150998	0.00474963
ENSG00000144524.13	COPS7B	0.148276	0.00475327
ENSG00000132359.9	RAP1GAP2	-0.173771	0.0047649
ENSG00000197417.7	SHPK	0.354241	0.00477287
ENSG00000124766.4	SOX4	-0.117804	0.00478049
ENSG00000168209.4	DDIT4	-0.399311	0.00480483
ENSG00000163155.7	LYSMD1	-0.249007	0.00483316
ENSG00000205476.4	CCDC85C	0.255023	0.00483692
ENSG00000163956.6	LRPAP1	0.140088	0.004846
ENSG00000105409.11	ATP1A3	-0.184299	0.0048551
ENSG00000167085.7	PHB	0.150114	0.00487388
ENSG00000159335.11	PTMS	0.45331	0.00489168
ENSG00000187840.4	EIF4EBP1	0.197879	0.00489322
ENSG00000198890.6	PRMT6	0.174265	0.00489671
ENSG00000230551.3	CTB-89H12.4	-0.18125	0.00489671
ENSG00000182518.9	FAM104B	0.299403	0.00489671
ENSG00000079387.9	SENP1	0.169846	0.00489671
ENSG00000213390.6	ARHGAP19	0.153561	0.00489707
ENSG00000050438.12	SLC4A8	-0.402964	0.00493361
ENSG00000150316.7	CWC15	0.163998	0.00493361
ENSG00000205663.5	RP11-706O15.5	-0.160552	0.00493552
ENSG00000187145.10	MRPS21	0.168853	0.00494204
ENSG00000188971.4	RP11-427H3.3	-0.137585	0.00494204
ENSG00000109736.10	MFSD10	0.148073	0.0049592
ENSG00000258082.1	RP11-443B7.3	-0.404743	0.00502416
ENSG00000198899.2	MT-ATP6	0.149444	0.00502933
ENSG00000121057.8	AKAP1	0.130799	0.00503027
ENSG00000081320.6	STK17B	-0.16213	0.00503027
ENSG00000263159.1	RP11-462G12.4	-0.655218	0.00504411
ENSG00000082515.12	MRPL22	0.181301	0.00505342
ENSG00000109606.8	DHX15	0.112944	0.00505342
ENSG00000210154.1	MT-TD	-0.356992	0.00505646
ENSG00000115425.9	PECR	-0.372905	0.00505646
ENSG00000228474.1	OST4	0.16491	0.00508979
ENSG00000103260.4	METRN	0.187547	0.00510085
ENSG00000100413.12	POLR3H	0.139883	0.00511579
ENSG00000005156.7	LIG3	0.132038	0.00511579
ENSG00000115541.6	HSPE1	0.192159	0.00511579
ENSG00000215346.3	AF131215.5	-0.32497	0.00511579
ENSG00000135829.12	DHX9	0.119591	0.00511579
ENSG00000176390.10	CRLF3	-0.163904	0.00512201
ENSG00000197142.6	ACSL5	0.178309	0.00512436
ENSG00000211460.7	TSN	0.149413	0.0051428
ENSG00000128039.6	SRD5A3	0.170988	0.0051496
ENSG00000112473.12	SLC39A7	0.166326	0.00515261
ENSG00000102178.8	UBL4A	0.145937	0.00516402
ENSG00000069275.12	NUCKS1	0.145256	0.00516902
ENSG00000166788.5	SAAL1	0.196112	0.00517237
ENSG00000135624.11	CCT7	0.1435	0.00519585
ENSG00000197782.10	ZNF780A	-0.160062	0.00522368
ENSG00000163818.12	LZTFL1	0.216367	0.00527967
ENSG00000164091.7	WDR82	0.122837	0.00528927
ENSG00000127804.8	METTL16	0.140469	0.00530231
ENSG00000137166.10	FOXP4	0.171772	0.00530231
ENSG00000136811.12	ODF2	0.137059	0.00530231
ENSG00000136810.8	TXN	0.179022	0.00531157
ENSG00000214826.4	DDX12P	0.19657	0.0053191
ENSG00000189212.8	DPY19L2P1	0.573566	0.00532921
ENSG00000166889.13	PATL1	0.124653	0.0053409
ENSG00000140451.8	PIF1	0.220665	0.0053409
ENSG00000179978.10	RP11-1319K7.1	-0.33625	0.00536253
ENSG00000063015.15	SEZ6	-0.331721	0.00537768
ENSG00000189306.6	RRP7A	0.137098	0.0053839
ENSG00000166710.13	B2M	0.164827	0.0053839
ENSG00000269640.1	CTD-2521M24.9	-0.242469	0.00540216
ENSG00000104687.8	GSR	0.172338	0.00540842
ENSG00000123131.8	PRDX4	0.191913	0.00541864
ENSG00000010803.12	SCMH1	0.145961	0.00546695
ENSG00000137713.11	PPP2R1B	0.136055	0.00547027
ENSG00000177076.4	ACER2	-0.349708	0.00551403
ENSG00000109534.12	GAR1	0.194701	0.00552463
ENSG00000175470.14	PPP2R2D	0.162317	0.00553145
ENSG00000005448.12	WDR54	0.222664	0.0055522
ENSG00000232290.1	RP1-292B18.3	-0.593085	0.00561148
ENSG00000003249.9	DBNDD1	-0.532922	0.00564506
ENSG00000177156.6	TALDO1	0.140375	0.00566012
ENSG00000184575.7	XPOT	0.144304	0.00566686
ENSG00000112514.11	CUTA	0.189595	0.00566686
ENSG00000227081.4	RP11-543P15.1	0.229749	0.00567044
ENSG00000165501.12	LRR1	0.210953	0.00571671
ENSG00000197345.8	MRPL21	0.160566	0.00575356
ENSG00000263327.2	TAPT1-AS1	-0.353391	0.00575996
ENSG00000135926.8	TMBIM1	-0.174085	0.00575996
ENSG00000267041.1	ZNF850	0.136683	0.00576569
ENSG00000168016.9	TRANK1	-0.523059	0.00576569
ENSG00000119185.8	ITGB1BP1	0.155334	0.00579762
ENSG00000112144.11	ICK	0.176489	0.00579802
ENSG00000128626.7	MRPS12	0.159487	0.00579865
ENSG00000106829.14	TLE4	-0.126802	0.00581301
ENSG00000108344.10	PSMD3	0.151023	0.00581301
ENSG00000187522.9	HSPA14	0.144901	0.00581301
ENSG00000139946.5	PELI2	-0.181255	0.00584647
ENSG00000156587.11	UBE2L6	-0.407494	0.00584887
ENSG00000179632.5	MAF1	0.165871	0.0058738
ENSG00000076382.12	SPAG5	0.145188	0.0058738
ENSG00000101213.5	PTK6	-0.394026	0.00589194
ENSG00000101189.5	MRGBP	0.172414	0.00589338
ENSG00000239704.6	CDRT4	-0.568119	0.00589613
ENSG00000168421.8	RHOH	-0.324324	0.00589613
ENSG00000167699.9	GLOD4	0.157664	0.00589673
ENSG00000130684.9	ZNF337	-0.281988	0.0059141
ENSG00000133169.5	BEX1	-0.15231	0.0059141
ENSG00000101000.4	PROCR	-0.4986	0.0059141
ENSG00000240929.2	HIST2H2BB	-0.662126	0.00593472
ENSG00000204220.5	PFDN6	0.178915	0.00593472
ENSG00000117592.8	PRDX6	0.1681	0.00594558
ENSG00000170906.11	NDUFA3	0.20991	0.00596178
ENSG00000196923.9	PDLIM7	0.169771	0.00596555
ENSG00000224429.3	LINC00539	-0.356082	0.00596555
ENSG00000162004.12	CCDC78	-0.194702	0.00596658
ENSG00000173744.13	AGFG1	0.139559	0.00596658
ENSG00000176731.7	C8orf59	0.196825	0.00605422
ENSG00000094916.9	CBX5	0.11704	0.0060775
ENSG00000175602.2	CCDC85B	0.189501	0.00609567
ENSG00000165434.6	PGM2L1	-0.294903	0.00611278
ENSG00000068305.13	MEF2A	-0.163374	0.00612234
ENSG00000235601.1	RP11-231K24.2	-0.310877	0.00612818
ENSG00000107331.12	ABCA2	0.160813	0.00620915
ENSG00000061273.13	HDAC7	-0.186682	0.0062349
ENSG00000183691.4	NOG	-0.66486	0.0062349
ENSG00000115956.9	PLEK	0.117947	0.00624497
ENSG00000188452.9	CERKL	-0.198811	0.00624987
ENSG00000138376.6	BARD1	0.15468	0.00630961
ENSG00000115275.7	MOGS	0.156741	0.00631247
ENSG00000115484.10	CCT4	0.135354	0.00637009
ENSG00000187994.9	RINL	-0.189493	0.00637215
ENSG00000170017.8	ALCAM	0.187336	0.0063769
ENSG00000138778.7	CENPE	0.14271	0.00637921
ENSG00000197483.8	ZNF628	0.182406	0.00637921
ENSG00000129480.8	DTD2	0.230969	0.00637921
ENSG00000241769.3	LINC00893	-0.389647	0.00638302
ENSG00000196839.8	ADA	-0.150469	0.00640408
ENSG00000143178.8	TBX19	-0.367276	0.00640519
ENSG00000142453.7	CARM1	0.171952	0.0064084
ENSG00000160285.10	LSS	0.159772	0.00643199
ENSG00000137814.5	HAUS2	0.178087	0.00644198
ENSG00000150764.9	DIXDC1	-0.212293	0.00644791
ENSG00000143870.8	PDIA6	0.118112	0.00645894
ENSG00000273117.1	AC144652.1	0.390773	0.0064645
ENSG00000116898.7	MRPS15	0.165691	0.00650461
ENSG00000033030.9	ZCCHC8	0.175099	0.00650461
ENSG00000221241.1	SNORD88A	0.484403	0.00650461
ENSG00000177889.5	UBE2N	0.143406	0.00652996
ENSG00000136999.4	NOV	-0.590384	0.00653954
ENSG00000164818.11	HEATR2	0.144414	0.00653954
ENSG00000126432.9	PRDX5	0.207047	0.00653954
ENSG00000170801.5	HTRA3	-0.284641	0.00653954
ENSG00000154359.8	LONRF1	0.173315	0.00656084
ENSG00000161692.13	DBF4B	0.173472	0.00657667
ENSG00000080200.5	CRYBG3	-0.183118	0.00663247
ENSG00000246082.2	NUDT16P	0.44237	0.00664066
ENSG00000167419.6	LPO	0.388387	0.00664168
ENSG00000225614.2	ZNF469	-0.178895	0.00664385
ENSG00000186638.11	KIF24	0.161926	0.00665446
ENSG00000114450.5	GNB4	0.174795	0.00665446
ENSG00000064419.9	TNPO3	0.115966	0.00666899
ENSG00000177409.7	SAMD9L	-0.317865	0.00666899
ENSG00000170604.3	IRF2BP1	0.175123	0.00667142
ENSG00000141522.7	ARHGDIA	0.168055	0.0067219
ENSG00000129484.9	PARP2	0.163015	0.0067219
ENSG00000158716.4	DUSP23	0.240873	0.00674217
ENSG00000122417.11	ODF2L	-0.20793	0.00674217
ENSG00000117266.11	CDK18	-0.227604	0.00674996
ENSG00000100294.8	MCAT	0.182014	0.0068045
ENSG00000185633.6	NDUFA4L2	0.466025	0.0068045
ENSG00000100575.9	TIMM9	0.209123	0.00682888
ENSG00000138867.12	GUCD1	0.138957	0.00685316
ENSG00000013810.14	TACC3	0.133647	0.00689231
ENSG00000156471.8	PTDSS1	0.127798	0.00689674
ENSG00000167965.13	MLST8	0.189431	0.00693262
ENSG00000176542.5	KIAA2018	-0.120054	0.00694025
ENSG00000119812.14	FAM98A	0.176022	0.00695934
ENSG00000261226.1	RP11-830F9.7	-0.253766	0.00696684
ENSG00000132530.12	XAF1	-0.138952	0.0069849
ENSG00000172809.8	RPL38	0.17534	0.00699179
ENSG00000157152.12	SYN2	-0.48361	0.0070166
ENSG00000176076.6	KCNE1L	0.150062	0.0070196
ENSG00000261061.1	RP11-303E16.2	0.262757	0.00702086
ENSG00000167136.6	ENDOG	0.253298	0.00702086
ENSG00000213689.5	TREX1	0.196373	0.00705572
ENSG00000121966.6	CXCR4	0.146	0.00707999
ENSG00000157470.7	FAM81A	0.229767	0.00711019
ENSG00000103187.6	COTL1	0.144221	0.00713716
ENSG00000196220.11	SRGAP3	-0.180422	0.00713968
ENSG00000084623.7	EIF3I	0.14407	0.00714555
ENSG00000255491.1	RP11-1082L8.4	0.657028	0.00716393
ENSG00000171490.8	RSL1D1	0.13656	0.00716675
ENSG00000114626.13	ABTB1	-0.206696	0.0071724
ENSG00000165714.6	LOH12CR1	0.247473	0.0071724
ENSG00000164463.8	CREBRF	-0.21042	0.00717351
ENSG00000065485.13	PDIA5	0.164023	0.00717392
ENSG00000184254.12	ALDH1A3	0.441512	0.00720187
ENSG00000104886.5	PLEKHJ1	0.139587	0.00723463
ENSG00000188042.5	ARL4C	0.161235	0.00726406
ENSG00000122694.11	GLIPR2	-0.263227	0.00726486
ENSG00000164182.6	NDUFAF2	0.248523	0.00726486
ENSG00000103194.11	USP10	0.126809	0.00727726
ENSG00000139644.8	TMBIM6	0.129756	0.00730115
ENSG00000164054.11	SHISA5	0.173204	0.00733214
ENSG00000167118.6	URM1	0.164803	0.00733975
ENSG00000145912.4	NHP2	0.183248	0.00735648
ENSG00000102908.16	NFAT5	-0.140134	0.00738741
ENSG00000074416.9	MGLL	-0.193188	0.00741929
ENSG00000138663.4	COPS4	0.159088	0.00742695
ENSG00000204524.5	ZNF805	-0.19476	0.00742695
ENSG00000105576.11	TNPO2	0.125417	0.00742695
ENSG00000162946.16	DISC1	-0.22246	0.00743019
ENSG00000064666.10	CNN2	0.142965	0.00743103
ENSG00000198518.5	HIST1H4E	0.303843	0.00746125
ENSG00000137700.12	SLC37A4	0.17458	0.0074938
ENSG00000106605.6	BLVRA	0.583371	0.00751773
ENSG00000113068.5	PFDN1	0.151979	0.00752868
ENSG00000125656.4	CLPP	0.17322	0.00753305
ENSG00000034693.10	PEX3	0.253426	0.00753305
ENSG00000143294.10	PRCC	0.131393	0.0076148
ENSG00000156968.8	MPV17L	0.196816	0.0076148
ENSG00000184207.8	PGP	0.169822	0.00761661
ENSG00000178878.8	APOLD1	-0.151077	0.00764479
ENSG00000013364.14	MVP	-0.164551	0.00766073
ENSG00000125445.6	MRPS7	0.148803	0.00767581
ENSG00000188613.5	NANOS1	0.169813	0.00772121
ENSG00000084073.4	ZMPSTE24	0.186614	0.00772987
ENSG00000100605.12	ITPK1	0.162879	0.00773237
ENSG00000075239.9	ACAT1	0.153836	0.00780314
ENSG00000127445.9	PIN1	0.174721	0.00780699
ENSG00000256269.2	HMBS	0.158434	0.00786014
ENSG00000126215.9	XRCC3	0.147342	0.00788844
ENSG00000128739.16	SNRPN	-0.333805	0.00792384
ENSG00000078061.8	ARAF	0.158177	0.00792384
ENSG00000071655.13	MBD3	0.135061	0.00793422
ENSG00000100335.8	MIEF1	0.117729	0.0079726
ENSG00000184465.11	WDR27	-0.152665	0.00798634
ENSG00000137168.7	PPIL1	0.189585	0.00801243
ENSG00000197766.3	CFD	0.152848	0.00804368
ENSG00000130725.3	UBE2M	0.162979	0.00805255
ENSG00000260260.1	RP11-304L19.5	0.190166	0.00806744
ENSG00000131668.9	BARX1	-0.329805	0.00806744
ENSG00000142794.14	NBPF3	-0.270785	0.00806933
ENSG00000161996.13	WDR90	0.158143	0.00807118
ENSG00000167797.3	CDK2AP2	0.1868	0.0080761
ENSG00000011566.10	MAP4K3	-0.188742	0.00809403
ENSG00000056972.14	TRAF3IP2	-0.230219	0.00809403
ENSG00000087301.4	TXNDC16	0.250807	0.00814156
ENSG00000187790.6	FANCM	0.160983	0.00815265
ENSG00000136628.13	EPRS	0.143626	0.00816437
ENSG00000179091.4	CYC1	0.165206	0.00816739
ENSG00000166402.4	TUB	-0.402111	0.00817581
ENSG00000148832.10	PAOX	-0.305321	0.00819982
ENSG00000248971.2	KRT8P46	-0.324619	0.00819982
ENSG00000185112.4	FAM43A	0.206247	0.00819982
ENSG00000149532.11	CPSF7	0.113775	0.00819982
ENSG00000101911.8	PRPS2	0.162018	0.00821259
ENSG00000100100.8	PIK3IP1	-0.36913	0.00821537
ENSG00000130958.7	SLC35D2	-0.382377	0.00821574
ENSG00000179152.14	TCAIM	-0.171006	0.00821894
ENSG00000002822.11	MAD1L1	-0.173291	0.0082619
ENSG00000162714.8	ZNF496	0.154646	0.00829887
ENSG00000087589.12	CASS4	-0.429971	0.00834003
ENSG00000204463.8	BAG6	0.141609	0.00838353
ENSG00000117139.12	KDM5B	-0.109203	0.00841235
ENSG00000134247.9	PTGFRN	-0.179363	0.00842196
ENSG00000162062.10	C16orf59	0.188136	0.00842878
ENSG00000136942.10	RPL35	0.199887	0.00843103
ENSG00000179262.5	RAD23A	0.132184	0.00843103
ENSG00000157693.10	C9orf91	0.177246	0.00843104
ENSG00000160208.11	RRP1B	0.125145	0.008444
ENSG00000086475.10	SEPHS1	0.133804	0.00849129
ENSG00000204653.5	ASPDH	-0.551344	0.00849305
ENSG00000165264.6	NDUFB6	0.205984	0.00851648
ENSG00000182796.8	TMEM198B	-0.202239	0.00851674
ENSG00000173653.3	RCE1	0.205988	0.00853949
ENSG00000270145.1	CTD-2267D19.6	0.403446	0.00853949
ENSG00000183207.8	RUVBL2	0.163647	0.00861344
ENSG00000156709.9	AIFM1	0.139889	0.00865
ENSG00000118985.10	ELL2	0.20608	0.00866288
ENSG00000113763.6	UNC5A	-0.402102	0.0086875
ENSG00000085415.11	SEH1L	0.14947	0.00872752
ENSG00000100028.7	SNRPD3	0.144333	0.00873089
ENSG00000163257.6	DCAF16	0.128602	0.00876302
ENSG00000170145.4	SIK2	0.135078	0.00880252
ENSG00000198727.2	MT-CYB	0.159936	0.00880252
ENSG00000242485.1	MRPL20	0.179001	0.00880252
ENSG00000198668.6	CALM1	0.138655	0.00880906
ENSG00000162613.12	FUBP1	0.118932	0.00882285
ENSG00000185130.4	HIST1H2BL	0.375117	0.00883907
ENSG00000183943.5	PRKX	-0.128685	0.00887985
ENSG00000091164.8	TXNL1	0.149217	0.00891326
ENSG00000104853.11	CLPTM1	0.152649	0.00892899
ENSG00000137831.10	UACA	0.201074	0.00895219
ENSG00000256018.1	HIST1H3G	0.328668	0.00896844
ENSG00000175634.10	RPS6KB2	0.150497	0.00904948
ENSG00000011143.12	MKS1	0.207296	0.00905013
ENSG00000106682.10	EIF4H	0.120716	0.00906005
ENSG00000103356.11	EARS2	0.142598	0.00907652
ENSG00000163964.9	PIGX	0.152903	0.00907652
ENSG00000176978.9	DPP7	0.161882	0.00908025
ENSG00000106636.3	YKT6	0.149088	0.0091185
ENSG00000096384.15	HSP90AB1	0.122659	0.00914566
ENSG00000091542.8	ALKBH5	0.134793	0.00914566
ENSG00000130158.9	DOCK6	-0.157375	0.00917356
ENSG00000197119.8	SLC25A29	-0.152486	0.00917375
ENSG00000173621.8	LRFN4	0.166956	0.00920658
ENSG00000131652.9	THOC6	0.173914	0.00920658
ENSG00000147140.11	NONO	0.116345	0.00920726
ENSG00000260336.1	RP11-395B7.7	-0.159471	0.00920726
ENSG00000188738.9	FSIP2	-0.444908	0.00921148
ENSG00000198399.10	ITSN2	-0.126258	0.00922478
ENSG00000172269.12	DPAGT1	0.155382	0.00923378
ENSG00000257103.4	LSM14A	0.106689	0.00923949
ENSG00000125484.7	GTF3C4	0.122435	0.0092453
ENSG00000253853.1	GS1-57L11.1	-0.340232	0.00924562
ENSG00000183751.10	TBL3	0.155193	0.00925206
ENSG00000187514.10	PTMA	0.148895	0.00925206
ENSG00000129562.6	DAD1	0.163965	0.00928635
ENSG00000197837.3	HIST4H4	0.356065	0.00929613
ENSG00000184205.10	TSPYL2	0.333394	0.00932512
ENSG00000106299.7	WASL	-0.176291	0.00935244
ENSG00000196417.8	ZNF765	0.179724	0.00941876
ENSG00000256316.1	HIST1H3F	0.31546	0.0094392
ENSG00000108294.4	PSMB3	0.150339	0.00944691
ENSG00000105447.8	GRWD1	0.140885	0.00946771
ENSG00000131876.12	SNRPA1	0.147952	0.00948002
ENSG00000156642.12	NPTN	0.14378	0.00952608
ENSG00000171314.8	PGAM1	0.129432	0.00953979
ENSG00000254859.1	RP11-661A12.5	-0.506784	0.00953979
ENSG00000145907.10	G3BP1	0.119295	0.00953979
ENSG00000198833.6	UBE2J1	0.15808	0.00953979
ENSG00000158406.2	HIST1H4H	0.315853	0.00962784
ENSG00000150456.6	N6AMT2	0.224552	0.00974976
ENSG00000175556.12	LONRF3	0.241458	0.00974976
ENSG00000183978.7	COA3	0.191304	0.00975622
ENSG00000176340.3	COX8A	0.176378	0.00975862
ENSG00000115286.15	NDUFS7	0.153793	0.00978513
ENSG00000137992.10	DBT	-0.155251	0.00986475
ENSG00000221817.5	RP11-137L10.6	-0.246632	0.00986475
ENSG00000136718.5	IMP4	0.141324	0.00988969
ENSG00000179051.9	RCC2	0.11604	0.00989357
ENSG00000251322.3	SHANK3	0.284557	0.00993665
ENSG00000110104.7	CCDC86	0.164575	0.00995994
ENSG00000138074.10	SLC5A6	0.124269	0.0100599
ENSG00000083457.7	ITGAE	0.195399	0.0100599
ENSG00000207983.1	MIR613	-0.511567	0.0100622
ENSG00000186472.15	PCLO	0.194808	0.0100718
ENSG00000113552.11	GNPDA1	0.163733	0.0100718
ENSG00000188566.7	NDOR1	0.154835	0.0100718
ENSG00000128567.12	PODXL	0.188478	0.0100718
ENSG00000142798.12	HSPG2	-0.166157	0.010093
ENSG00000178695.4	KCTD12	0.286505	0.010093
ENSG00000111481.5	COPZ1	0.153911	0.0100992
ENSG00000128872.5	TMOD2	-0.536083	0.0101016
ENSG00000150457.7	LATS2	-0.190707	0.0101152
ENSG00000135378.3	PRRG4	0.207854	0.0101605
ENSG00000163444.7	TMEM183A	0.135537	0.0101722
ENSG00000132793.7	LPIN3	-0.306294	0.0102092
ENSG00000156042.13	TTC18	-0.406594	0.0102138
ENSG00000152240.8	HAUS1	0.187672	0.010225
ENSG00000078668.9	VDAC3	0.152439	0.0102376
ENSG00000244998.1	CTD-3064M3.4	-0.426873	0.0102545
ENSG00000165195.9	PIGA	0.213719	0.0103217
ENSG00000099338.18	CATSPERG	-0.338035	0.010403
ENSG00000107036.7	KIAA1432	-0.136059	0.010403
ENSG00000160131.9	VMA21	0.125792	0.010403
[truncated: 13,457 more rows]

## Sheet: NT C16 vs DMSO
Feature	Feature_gene_name	log2FoldChange	padj
ENSG00000163584.13	RPL22L1	-1.6554	3.9723e-237
ENSG00000213923.6	CSNK1E	-1.48251	4.52873e-206
ENSG00000135624.11	CCT7	-1.20935	2.64596e-178
ENSG00000132274.11	TRIM22	1.00011	6.06608e-176
ENSG00000115484.10	CCT4	-0.957236	1.40371e-157
ENSG00000089009.11	RPL6	-1.04809	1.90744e-142
ENSG00000172667.6	ZMAT3	1.24868	8.00347e-127
ENSG00000124762.9	CDKN1A	1.21568	2.05359e-123
ENSG00000146223.10	RPL7L1	-0.822181	3.17225e-105
ENSG00000122406.8	RPL5	-0.95292	6.88573e-101
ENSG00000131080.10	EDA2R	1.20962	2.77735e-99
ENSG00000135679.17	MDM2	0.92335	4.64793e-98
ENSG00000148303.12	RPL7A	-0.96683	6.57032e-94
ENSG00000147604.9	RPL7	-0.96406	1.32439e-91
ENSG00000162244.6	RPL29	-1.06749	1.64416e-91
ENSG00000182899.10	RPL35A	-0.998908	7.91212e-91
ENSG00000130255.8	RPL36	-1.16879	8.18439e-90
ENSG00000131469.8	RPL27	-1.01256	6.41181e-86
ENSG00000164938.9	TP53INP1	1.03256	1.71716e-78
ENSG00000071082.6	RPL31	-0.926154	9.31418e-78
ENSG00000109475.12	RPL34	-1.04245	2.05229e-76
ENSG00000120278.10	PLEKHG1	1.73479	1.42998e-75
ENSG00000145425.5	RPS3A	-0.868865	1.25999e-72
ENSG00000174748.14	RPL15	-0.784213	2.07977e-72
ENSG00000171863.8	RPS7	-0.806394	1.12083e-71
ENSG00000163682.11	RPL9	-0.892392	1.36125e-71
ENSG00000164587.7	RPS14	-0.892224	4.73351e-70
ENSG00000197756.5	RPL37A	-0.970445	8.92194e-70
ENSG00000223907.1	RP11-439L8.4	1.2524	1.46647e-68
ENSG00000136010.9	ALDH1L2	-0.911114	1.64812e-68
ENSG00000196756.7	SNHG17	-0.797298	7.48348e-68
ENSG00000125835.13	SNRPB	-0.901745	1.28661e-67
ENSG00000185432.10	METTL7A	0.832025	1.95259e-67
ENSG00000189091.8	SF3B3	-0.647965	2.77016e-65
ENSG00000055163.14	CYFIP2	1.08279	2.82541e-64
ENSG00000063177.8	RPL18	-0.817427	6.81324e-64
ENSG00000114391.8	RPL24	-0.766562	3.67984e-63
ENSG00000265681.2	RPL17	-0.99403	6.33111e-62
ENSG00000101347.7	SAMHD1	0.549543	4.37147e-61
ENSG00000229117.4	RPL41	-0.922574	5.10927e-61
ENSG00000149273.10	RPS3	-0.770895	6.28916e-61
ENSG00000116717.7	GADD45A	1.21944	7.18341e-61
ENSG00000187147.13	RNF220	-0.788789	1.14633e-60
ENSG00000138326.14	RPS24	-0.82897	2.00348e-58
ENSG00000161513.7	FDXR	0.851003	3.22173e-58
ENSG00000134419.11	RPS15A	-0.834031	1.9933e-57
ENSG00000130723.13	PRRC2B	-0.728332	2.25323e-57
ENSG00000172716.12	SLFN11	-1.16243	1.76544e-56
ENSG00000198034.6	RPS4X	-0.709315	4.16547e-56
ENSG00000100298.11	APOBEC3H	1.4514	7.56199e-56
ENSG00000205937.7	RNPS1	-0.590715	3.9655e-55
ENSG00000172809.8	RPL38	-0.877741	5.66435e-55
ENSG00000167658.11	EEF2	-0.794793	2.23036e-54
ENSG00000075151.15	EIF4G3	-0.573147	5.25719e-54
ENSG00000159388.5	BTG2	0.900196	6.48685e-54
ENSG00000115268.5	RPS15	-0.88714	4.45859e-53
ENSG00000125657.3	TNFSF9	0.823162	8.10396e-53
ENSG00000129824.11	RPS4Y1	-0.721695	7.10825e-51
ENSG00000124614.9	RPS10	-1.29885	1.06757e-49
ENSG00000161970.8	RPL26	-0.912709	8.9327e-49
ENSG00000145632.10	PLK2	0.735655	9.31557e-49
ENSG00000228682.2	RP11-439L8.3	1.21559	4.09337e-48
ENSG00000094804.5	CDC6	-0.568626	3.03164e-46
ENSG00000144713.8	RPL32	-0.793531	7.31912e-46
ENSG00000213462.4	ERV3-1	0.633929	3.55925e-45
ENSG00000227063.4	RPL41P1	-0.906825	3.69245e-45
ENSG00000142676.8	RPL11	-0.757352	3.70823e-45
ENSG00000164045.7	CDC25A	-0.569713	6.79356e-45
ENSG00000140181.10	HERC2P2	0.577021	5.54575e-44
ENSG00000173530.5	TNFRSF10D	0.647669	3.30327e-43
ENSG00000125691.8	RPL23	-0.689794	4.52138e-43
ENSG00000076003.4	MCM6	-0.522987	5.54735e-43
ENSG00000232956.4	SNHG15	-0.667714	2.30243e-42
ENSG00000100316.11	RPL3	-0.642606	1.03949e-41
ENSG00000155974.7	GRIP1	0.671704	2.9017e-41
ENSG00000080546.9	SESN1	0.76342	7.52103e-40
ENSG00000136942.10	RPL35	-0.846291	1.29404e-39
ENSG00000249437.3	NAIP	0.774856	1.3286e-39
ENSG00000134574.7	DDB2	0.586853	1.51951e-39
ENSG00000128322.6	IGLL1	-1.00317	1.81595e-39
ENSG00000125726.6	CD70	0.731815	2.67445e-39
ENSG00000124942.9	AHNAK	0.489968	2.7361e-39
ENSG00000066294.10	CD84	0.744129	4.69447e-39
ENSG00000137970.7	RP11-122C9.1	-1.09263	5.91766e-39
ENSG00000120889.8	TNFRSF10B	0.54925	2.05514e-38
ENSG00000171848.9	RRM2	-0.435055	2.73553e-38
ENSG00000142937.7	RPS8	-0.638842	7.28271e-38
ENSG00000198563.9	DDX39B	-0.548444	1.1395e-37
ENSG00000235552.4	RPL6P27	-1.21733	1.52585e-37
ENSG00000095970.12	TREM2	1.03791	2.42932e-37
ENSG00000048392.7	RRM2B	0.677898	7.7901e-37
ENSG00000142864.10	SERBP1	-0.50138	1.54068e-36
ENSG00000065328.12	MCM10	-0.467383	1.08912e-35
ENSG00000076248.6	UNG	-0.555686	1.29666e-35
ENSG00000104738.12	MCM4	-0.436652	2.09748e-35
ENSG00000196839.8	ADA	0.596478	1.12791e-33
ENSG00000198755.6	RPL10A	-0.576535	1.31041e-33
ENSG00000251562.3	MALAT1	0.525389	1.43227e-33
ENSG00000178104.15	PDE4DIP	0.457499	1.55184e-33
ENSG00000160200.13	CBS	-1.09676	1.63383e-33
ENSG00000231500.2	RPS18	-0.660594	1.93648e-33
ENSG00000103257.4	SLC7A5	-0.615132	1.16877e-32
ENSG00000112773.11	FAM46A	0.590571	2.10499e-32
ENSG00000124767.6	GLO1	-0.612048	2.23054e-32
ENSG00000135842.12	FAM129A	-0.969149	4.25467e-32
ENSG00000168496.3	FEN1	-0.567019	9.87223e-32
ENSG00000145592.9	RPL37	-0.632838	1.14272e-31
ENSG00000154767.10	XPC	0.496	2.64589e-31
ENSG00000082074.11	FYB	0.611871	3.66455e-31
ENSG00000167526.9	RPL13	-0.613795	7.42135e-31
ENSG00000090861.11	AARS	-0.552734	1.74427e-30
ENSG00000204628.7	GNB2L1	-0.570756	2.19817e-30
ENSG00000175832.8	ETV4	-1.13876	2.77254e-30
ENSG00000085840.8	ORC1	-0.486538	3.24398e-30
ENSG00000163947.7	ARHGEF3	0.557343	8.43566e-30
ENSG00000064687.8	ABCA7	0.540918	1.59021e-29
ENSG00000174307.5	PHLDA3	0.656249	7.24906e-29
ENSG00000242071.2	RPL7AP6	-1.197	2.61919e-28
ENSG00000152580.8	IGSF10	-0.586487	4.41942e-28
ENSG00000244313.2	RP11-425L10.1	-1.04237	4.51067e-28
ENSG00000099725.10	PRKY	0.581271	1.68214e-27
ENSG00000149485.12	FADS1	-0.462433	1.89538e-27
ENSG00000075391.12	RASAL2	0.461133	3.05206e-27
ENSG00000166432.10	ZMAT1	0.812817	3.51135e-27
ENSG00000131153.4	GINS2	-0.497696	5.21565e-27
ENSG00000155660.6	PDIA4	-0.435021	5.80561e-27
ENSG00000186603.4	HPDL	-0.622194	6.4585e-27
ENSG00000026103.15	FAS	1.09344	6.4585e-27
ENSG00000134644.11	PUM1	-0.400514	7.94881e-27
ENSG00000134684.6	YARS	-0.479898	1.23188e-26
ENSG00000100433.11	KCNK10	0.516021	1.48888e-26
ENSG00000137154.8	RPS6	-0.483459	1.99317e-26
ENSG00000198918.7	RPL39	-0.562096	2.11928e-26
ENSG00000088325.11	TPX2	-0.415114	2.77638e-26
ENSG00000110628.9	SLC22A18	0.733408	3.38914e-26
ENSG00000134057.10	CCNB1	-0.446913	5.99582e-26
ENSG00000152926.10	ZNF117	0.676194	1.04921e-25
ENSG00000196890.3	HIST3H2BB	-0.718865	1.05513e-25
ENSG00000162511.7	LAPTM5	0.429946	1.23739e-25
ENSG00000034063.9	UHRF1	-0.414728	1.45673e-25
ENSG00000143476.13	DTL	-0.428002	1.68239e-25
ENSG00000113368.7	LMNB1	-0.36705	2.07977e-25
ENSG00000063046.13	EIF4B	-0.383224	2.17472e-25
ENSG00000135069.9	PSAT1	-0.674449	2.38447e-25
ENSG00000151474.15	FRMD4A	0.688963	2.74182e-25
ENSG00000161016.11	RPL8	-0.556702	2.91248e-25
ENSG00000196531.6	NACA	-0.491643	3.11793e-25
ENSG00000117289.7	TXNIP	0.424183	3.1415e-25
ENSG00000153029.10	MR1	0.470039	4.20941e-25
ENSG00000145386.5	CCNA2	-0.438536	7.80295e-25
ENSG00000186193.7	SAPCD2	-0.531717	7.80295e-25
ENSG00000171132.9	PRKCE	0.523293	9.22524e-25
ENSG00000228340.1	RP5-1043L13.1	0.583318	9.76221e-25
ENSG00000173546.7	CSPG4	0.535213	1.05494e-24
ENSG00000177602.4	GSG2	-0.515375	1.31585e-24
ENSG00000112697.11	TMEM30A	0.525257	1.48628e-24
ENSG00000180198.11	RCC1	-0.440177	1.7332e-24
ENSG00000167670.11	CHAF1A	-0.453292	1.96367e-24
ENSG00000100353.13	EIF3D	-0.456126	2.19711e-24
ENSG00000167325.10	RRM1	-0.424832	2.27324e-24
ENSG00000170581.9	STAT2	0.429365	3.48519e-24
ENSG00000166508.13	MCM7	-0.493332	6.74096e-24
ENSG00000092621.7	PHGDH	-1.24446	1.22345e-23
ENSG00000117411.12	B4GALT2	-0.529219	1.46736e-23
ENSG00000149294.12	NCAM1	-0.834911	2.16599e-23
ENSG00000116237.11	ICMT	-0.421217	2.68314e-23
ENSG00000128272.10	ATF4	-0.571789	2.96427e-23
ENSG00000174371.12	EXO1	-0.413816	3.05784e-23
ENSG00000093072.11	CECR1	0.669219	3.15026e-23
ENSG00000178202.8	KDELC2	-0.521171	3.32576e-23
ENSG00000156970.8	BUB1B	-0.359774	3.64342e-23
ENSG00000108953.12	YWHAE	-0.435118	5.94976e-23
ENSG00000179639.6	FCER1A	1.29369	1.01018e-22
ENSG00000234745.5	HLA-B	0.413869	1.0142e-22
ENSG00000142798.12	HSPG2	0.524194	1.05698e-22
ENSG00000196220.11	SRGAP3	0.574948	1.36257e-22
ENSG00000139597.12	N4BP2L1	0.480673	1.36595e-22
ENSG00000078900.10	TP73	-0.813833	1.55411e-22
ENSG00000101003.8	GINS1	-0.453393	1.86546e-22
ENSG00000234741.3	GAS5	-0.423287	2.3753e-22
ENSG00000114867.15	EIF4G1	-0.433445	2.44821e-22
ENSG00000112118.13	MCM3	-0.426481	3.0313e-22
ENSG00000148290.5	SURF1	0.506575	3.05639e-22
ENSG00000224078.8	SNHG14	0.38984	3.9101e-22
ENSG00000148180.12	GSN	0.510454	4.37926e-22
ENSG00000169813.12	HNRNPF	-0.372588	4.65454e-22
ENSG00000105327.11	BBC3	0.631442	4.67364e-22
ENSG00000017483.10	SLC38A5	-0.515768	6.14403e-22
ENSG00000092853.9	CLSPN	-0.404314	8.01132e-22
ENSG00000189057.6	FAM111B	-1.18602	8.60155e-22
ENSG00000243199.1	RP11-408P14.1	-1.03526	8.90755e-22
ENSG00000103522.11	IL21R	0.812409	1.08868e-21
ENSG00000166483.6	WEE1	-0.412014	1.1638e-21
ENSG00000179218.9	CALR	-0.403798	1.2048e-21
ENSG00000173848.14	NET1	-0.452968	1.24768e-21
ENSG00000171502.10	COL24A1	0.48199	1.40692e-21
ENSG00000064547.9	LPAR2	0.548285	1.68257e-21
ENSG00000159259.7	CHAF1B	-0.491574	2.26772e-21
ENSG00000179348.7	GATA2	-1.22721	2.49946e-21
ENSG00000166803.6	KIAA0101	-0.500809	3.09518e-21
ENSG00000116062.10	MSH6	-0.340306	3.42434e-21
ENSG00000073111.9	MCM2	-0.465865	3.53716e-21
ENSG00000234797.4	RPS3AP6	-0.835229	4.48722e-21
ENSG00000109323.4	MANBA	0.430874	4.68338e-21
ENSG00000101057.11	MYBL2	-0.489919	5.25404e-21
ENSG00000120708.12	TGFBI	0.532603	7.8971e-21
ENSG00000234546.2	RP3-510D11.2	1.49044	9.01833e-21
ENSG00000188626.5	GOLGA8M	0.358193	9.82618e-21
ENSG00000168528.7	SERINC2	0.601966	1.07803e-20
ENSG00000106105.9	GARS	-0.44004	1.08172e-20
ENSG00000022267.12	FHL1	-0.542135	1.62515e-20
ENSG00000185088.8	RPS27L	0.556124	1.96722e-20
ENSG00000133812.10	SBF2	0.508575	2.0841e-20
ENSG00000185633.6	NDUFA4L2	-1.20734	2.5454e-20
ENSG00000160593.13	AMICA1	0.736398	3.15001e-20
ENSG00000166928.6	MS4A14	0.756783	3.16418e-20
ENSG00000149554.8	CHEK1	-0.40378	3.31027e-20
ENSG00000101439.4	CST3	0.503231	3.31938e-20
ENSG00000077684.11	PHF17	-0.40034	3.63054e-20
ENSG00000058091.12	CDK14	-0.777557	4.23144e-20
ENSG00000115457.5	IGFBP2	-0.471995	4.2842e-20
ENSG00000112312.5	GMNN	-0.443652	7.63373e-20
ENSG00000168003.12	SLC3A2	-0.451625	7.84841e-20
ENSG00000139174.6	PRICKLE1	-0.623152	1.14489e-19
ENSG00000171469.6	ZNF561	0.416498	1.15473e-19
ENSG00000155926.9	SLA	0.451329	1.55738e-19
ENSG00000111445.9	RFC5	-0.413306	1.81674e-19
ENSG00000127415.8	IDUA	0.522963	1.92797e-19
ENSG00000127561.10	SYNGR3	1.01692	1.92797e-19
ENSG00000214389.2	RPS3AP26	-1.07736	1.9343e-19
ENSG00000249859.3	PVT1	0.516454	1.94063e-19
ENSG00000106070.13	GRB10	-0.498067	1.94504e-19
ENSG00000174776.6	WDR49	0.547485	2.06725e-19
ENSG00000171298.8	GAA	0.486008	2.30075e-19
ENSG00000105011.4	ASF1B	-0.426536	2.89004e-19
ENSG00000010292.8	NCAPD2	-0.344553	3.14933e-19
ENSG00000029993.10	HMGB3	-0.388519	4.24866e-19
ENSG00000183044.7	ABAT	0.689405	4.53993e-19
ENSG00000044574.7	HSPA5	-0.369676	5.20195e-19
ENSG00000087088.15	BAX	0.463117	5.4259e-19
ENSG00000146670.5	CDCA5	-0.462392	7.85831e-19
ENSG00000112242.10	E2F3	-0.403231	9.49236e-19
ENSG00000079819.12	EPB41L2	-0.369692	9.92215e-19
ENSG00000189343.6	RPS2P46	-0.398526	1.01508e-18
ENSG00000137265.10	IRF4	0.552288	1.09472e-18
ENSG00000198300.8	PEG3	0.853901	1.28969e-18
ENSG00000163803.8	PLB1	0.56116	1.33945e-18
ENSG00000164796.13	CSMD3	0.458792	1.35167e-18
ENSG00000071205.7	ARHGAP10	0.436724	1.36861e-18
ENSG00000167513.4	CDT1	-0.492178	1.5726e-18
ENSG00000198435.2	NRARP	-0.609554	1.61717e-18
ENSG00000165304.3	MELK	-0.397374	1.69387e-18
ENSG00000127507.13	EMR2	0.365348	2.15065e-18
ENSG00000140403.8	DNAJA4	-0.389452	2.19255e-18
ENSG00000004478.5	FKBP4	-0.404754	2.29378e-18
ENSG00000146278.10	PNRC1	0.365584	3.36107e-18
ENSG00000142733.10	MAP3K6	-0.579011	3.85642e-18
ENSG00000161800.8	RACGAP1	-0.336653	4.53433e-18
ENSG00000101255.6	TRIB3	-0.772375	4.5574e-18
ENSG00000146410.7	MTFR2	-0.476156	5.11624e-18
ENSG00000123684.8	LPGAT1	-1.0479	6.23518e-18
ENSG00000104055.10	TGM5	0.416277	6.79216e-18
ENSG00000147536.7	GINS4	-0.376285	7.21558e-18
ENSG00000035141.3	FAM136A	-0.364338	7.58846e-18
ENSG00000073910.15	FRY	0.328732	7.82259e-18
ENSG00000014138.4	POLA2	-0.387162	7.85003e-18
ENSG00000259953.1	RP11-4O1.2	0.398373	8.79366e-18
ENSG00000007237.14	GAS7	0.678759	9.12314e-18
ENSG00000129932.3	DOHH	-0.500031	9.66434e-18
ENSG00000153044.5	CENPH	-0.543254	9.84281e-18
ENSG00000198561.8	CTNND1	0.490832	1.04048e-17
ENSG00000125944.14	HNRNPR	-0.359507	1.39721e-17
ENSG00000154359.8	LONRF1	-0.481665	1.44232e-17
ENSG00000148488.11	ST8SIA6	0.636821	1.4906e-17
ENSG00000112715.16	VEGFA	-0.535105	1.58284e-17
ENSG00000166881.5	TMEM194A	-0.358117	1.64006e-17
ENSG00000118971.3	CCND2	0.340165	1.8273e-17
ENSG00000201512.1	SNORA71C	-0.804681	1.92948e-17
ENSG00000123080.6	CDKN2C	-0.455706	2.01699e-17
ENSG00000105223.14	PLD3	0.526439	2.01866e-17
ENSG00000170734.7	POLH	0.408856	2.10755e-17
ENSG00000181938.9	GINS3	-0.488573	2.18172e-17
ENSG00000196517.7	SLC6A9	-1.37367	2.38206e-17
ENSG00000120256.5	LRP11	-0.49362	2.38702e-17
ENSG00000168411.9	RFWD3	-0.32244	2.6733e-17
ENSG00000173456.4	RNF26	-0.450502	2.72393e-17
ENSG00000134824.9	FADS2	-0.49799	2.8027e-17
ENSG00000198901.9	PRC1	-0.346033	2.93679e-17
ENSG00000230202.1	RP11-632C17__A.1	-1.16931	3.06811e-17
ENSG00000100297.11	MCM5	-0.461808	3.12527e-17
ENSG00000148248.9	SURF4	-0.359278	3.18254e-17
ENSG00000165912.11	PACSIN3	-1.12475	3.21748e-17
ENSG00000088854.11	C20orf194	0.348695	3.23894e-17
ENSG00000196141.8	SPATS2L	-0.605458	3.42566e-17
ENSG00000118655.4	DCLRE1B	-0.457744	3.63937e-17
ENSG00000146192.10	FGD2	0.659811	4.96322e-17
ENSG00000099194.5	SCD	-0.387286	6.1399e-17
ENSG00000051180.12	RAD51	-0.406716	6.22179e-17
ENSG00000149212.6	SESN3	0.459373	6.49737e-17
ENSG00000117593.8	DARS2	-0.36496	6.86422e-17
ENSG00000137841.7	PLCB2	0.414017	8.14211e-17
ENSG00000101412.9	E2F1	-0.437764	8.763e-17
ENSG00000149428.14	HYOU1	-0.381553	9.16709e-17
ENSG00000124575.5	HIST1H1D	-0.416336	1.02439e-16
ENSG00000111206.8	FOXM1	-0.370652	1.11016e-16
ENSG00000197930.8	ERO1L	-0.407816	1.29126e-16
ENSG00000134962.6	KLB	-1.00125	1.30613e-16
ENSG00000137563.7	GGH	-0.501319	1.40428e-16
ENSG00000240342.2	RPS2P5	-0.487304	1.42785e-16
ENSG00000120802.9	TMPO	-0.409782	1.47252e-16
ENSG00000197506.6	SLC28A3	0.465895	1.75148e-16
ENSG00000092820.13	EZR	-0.419864	1.75148e-16
ENSG00000112249.9	ASCC3	0.366704	1.77268e-16
ENSG00000108424.5	KPNB1	-0.297504	1.86322e-16
ENSG00000198150.2	AC135178.1	1.35924	1.86322e-16
ENSG00000214140.6	PRCD	1.18897	1.95907e-16
ENSG00000059588.5	TARBP1	0.31895	1.96562e-16
ENSG00000179294.5	C17orf96	-0.645131	2.06439e-16
ENSG00000157456.3	CCNB2	-0.360021	2.13862e-16
ENSG00000204469.8	PRRC2A	-0.389341	2.38881e-16
ENSG00000160447.6	PKN3	-0.502133	2.51673e-16
ENSG00000089685.10	BIRC5	-0.431671	2.80757e-16
ENSG00000161911.7	TREML1	1.43642	3.46235e-16
ENSG00000110077.10	MS4A6A	0.363066	3.53766e-16
ENSG00000213694.3	S1PR3	-0.401042	3.55566e-16
ENSG00000215784.4	FAM72D	-0.517969	4.30459e-16
ENSG00000237649.3	KIFC1	-0.378499	4.553e-16
ENSG00000115306.11	SPTBN1	-0.769011	4.70223e-16
ENSG00000099998.13	GGT5	0.746515	5.14305e-16
ENSG00000162063.8	CCNF	-0.381229	5.60554e-16
ENSG00000196230.8	TUBB	-0.360474	6.04728e-16
ENSG00000179981.9	TSHZ1	-0.331337	6.076e-16
ENSG00000169679.10	BUB1	-0.313838	6.32046e-16
ENSG00000129566.8	TEP1	0.396567	6.43532e-16
ENSG00000165480.11	SKA3	-0.370015	7.3972e-16
ENSG00000123485.7	HJURP	-0.330362	8.68251e-16
ENSG00000007968.6	E2F2	-0.417833	8.86132e-16
ENSG00000006756.11	ARSD	0.403477	8.90103e-16
ENSG00000183405.5	RPS7P1	-0.777246	9.19869e-16
ENSG00000080824.14	HSP90AA1	-0.344846	9.48149e-16
ENSG00000148773.8	MKI67	-0.344825	9.53597e-16
ENSG00000115163.10	CENPA	-0.385485	9.53597e-16
ENSG00000104043.10	ATP8B4	0.359066	1.33191e-15
ENSG00000204256.8	BRD2	-0.354675	1.33191e-15
ENSG00000101945.12	SUV39H1	-0.413113	1.35447e-15
ENSG00000137804.8	NUSAP1	-0.338915	1.43272e-15
ENSG00000136026.9	CKAP4	-1.40381	1.82234e-15
ENSG00000143546.5	S100A8	1.24676	1.88671e-15
ENSG00000014257.11	ACPP	0.429241	1.88671e-15
ENSG00000182578.9	CSF1R	0.495995	1.98225e-15
ENSG00000198890.6	PRMT6	-0.39381	2.03786e-15
ENSG00000164032.7	H2AFZ	-0.358808	2.21365e-15
ENSG00000181418.7	DDN	-0.935448	2.91411e-15
ENSG00000140534.9	TICRR	-0.336521	3.10109e-15
ENSG00000155849.11	ELMO1	0.337265	3.25796e-15
ENSG00000105967.11	TFEC	0.515476	3.40292e-15
ENSG00000117399.9	CDC20	-0.392373	3.40292e-15
ENSG00000137310.7	TCF19	-0.390738	3.42018e-15
ENSG00000256043.2	CTSO	0.641484	3.50958e-15
ENSG00000148655.10	C10orf11	0.588895	3.51812e-15
ENSG00000129173.8	E2F8	-0.361963	3.60223e-15
ENSG00000012048.15	BRCA1	-0.355774	3.69479e-15
ENSG00000135045.6	C9orf40	-0.442327	4.19773e-15
ENSG00000075826.12	SEC31B	0.589893	4.50111e-15
ENSG00000166436.11	TRIM66	0.394012	4.81881e-15
ENSG00000163683.7	SMIM14	0.632675	5.59605e-15
ENSG00000132359.9	RAP1GAP2	0.481965	5.66082e-15
ENSG00000198056.9	PRIM1	-0.430549	5.66082e-15
ENSG00000140988.11	RPS2	-0.424496	5.75478e-15
ENSG00000120694.15	HSPH1	-0.347046	5.86874e-15
ENSG00000154839.5	SKA1	-0.421434	6.57714e-15
ENSG00000109685.13	WHSC1	-0.286278	7.53904e-15
ENSG00000136938.8	ANP32B	-0.322927	7.63499e-15
ENSG00000093009.5	CDC45	-0.394165	7.78741e-15
ENSG00000141858.7	SAMD1	-0.453388	7.88508e-15
ENSG00000173821.15	RNF213	0.357927	8.78966e-15
ENSG00000187741.10	FANCA	-0.335395	9.4872e-15
ENSG00000101868.6	POLA1	-0.314319	1.19528e-14
ENSG00000108829.9	LRRC59	-0.333166	1.20024e-14
ENSG00000139514.8	SLC7A1	-0.333435	1.26052e-14
ENSG00000117616.13	C1orf63	0.320488	1.355e-14
ENSG00000100889.7	PCK2	-0.624385	1.36281e-14
ENSG00000058804.10	NDC1	-0.364511	1.40481e-14
ENSG00000130294.10	KIF1A	1.22549	1.43585e-14
ENSG00000065150.14	IPO5	-0.292716	1.55527e-14
ENSG00000256325.1	RP11-611O2.1	1.17651	1.59353e-14
ENSG00000091592.11	NLRP1	0.480478	1.65928e-14
ENSG00000140406.2	MESDC1	-0.483255	1.74738e-14
ENSG00000079616.8	KIF22	-0.349708	2.10458e-14
ENSG00000163406.6	SLC15A2	0.465708	2.12648e-14
ENSG00000173207.8	CKS1B	-0.363647	2.14763e-14
ENSG00000250903.4	GMDS-AS1	0.504691	2.19472e-14
ENSG00000148229.8	POLE3	-0.351852	2.26923e-14
ENSG00000143226.9	FCGR2A	0.430271	2.40823e-14
ENSG00000161888.7	SPC24	-0.383459	2.40823e-14
ENSG00000141540.6	TTYH2	0.517062	2.46713e-14
ENSG00000135486.13	HNRNPA1	-0.31547	2.71432e-14
ENSG00000223745.3	RP4-717I23.3	0.454339	2.75938e-14
ENSG00000188229.5	TUBB4B	-0.409161	2.75938e-14
ENSG00000182481.4	KPNA2	-0.318092	2.77656e-14
ENSG00000169258.6	GPRIN1	-0.613246	2.81545e-14
ENSG00000137642.8	SORL1	0.417914	2.81545e-14
ENSG00000128944.9	KNSTRN	-0.327855	3.46182e-14
ENSG00000074696.8	PTPLAD1	-0.329771	4.02076e-14
ENSG00000179041.2	RRS1	-0.355005	4.09929e-14
ENSG00000156802.8	ATAD2	-0.337466	4.10224e-14
ENSG00000157404.11	KIT	0.607674	4.13305e-14
ENSG00000164626.8	KCNK5	-0.564725	4.23552e-14
ENSG00000013573.12	DDX11	-0.32933	4.53024e-14
ENSG00000161929.10	SCIMP	0.676568	4.79139e-14
ENSG00000171914.10	TLN2	0.614773	5.0153e-14
ENSG00000114841.13	DNAH1	0.405533	5.2922e-14
ENSG00000271430.1	RP3-368A4.5	0.636616	5.40175e-14
ENSG00000197958.8	RPL12	-0.415133	6.15361e-14
ENSG00000186185.9	KIF18B	-0.365312	6.30833e-14
ENSG00000121211.3	MND1	-0.487341	6.46548e-14
ENSG00000125977.6	EIF2S2	-0.370873	6.51217e-14
ENSG00000122952.12	ZWINT	-0.358295	6.87095e-14
ENSG00000166938.8	DIS3L	-0.307027	6.89084e-14
ENSG00000186918.9	ZNF395	-0.411012	6.95896e-14
ENSG00000163071.6	SPATA18	1.15217	6.95896e-14
ENSG00000092470.7	WDR76	-0.308786	7.39769e-14
ENSG00000145050.11	MANF	-0.370513	7.64989e-14
ENSG00000182199.6	SHMT2	-0.421037	7.78175e-14
ENSG00000125089.12	SH3TC1	0.70913	8.36717e-14
ENSG00000163362.6	C1orf106	-0.501428	8.65372e-14
ENSG00000184465.11	WDR27	0.386889	9.85601e-14
ENSG00000256663.1	RP11-424C20.2	-0.476211	1.01373e-13
ENSG00000087586.13	AURKA	-0.313743	1.02845e-13
ENSG00000264112.1	RP11-159D12.2	0.450618	1.03138e-13
ENSG00000087245.8	MMP2	0.492642	1.06586e-13
ENSG00000123374.6	CDK2	-0.375574	1.1695e-13
ENSG00000140450.7	ARRDC4	0.488109	1.18047e-13
ENSG00000133119.8	RFC3	-0.399307	1.19329e-13
ENSG00000164087.3	POC1A	-0.392794	1.21249e-13
ENSG00000172748.8	ZNF596	0.570086	1.3989e-13
ENSG00000125124.7	BBS2	0.379729	1.40678e-13
ENSG00000204389.8	HSPA1A	-0.414541	1.52951e-13
ENSG00000148835.9	TAF5	-0.393288	1.82948e-13
ENSG00000130707.13	ASS1	-0.451364	1.89485e-13
ENSG00000078237.4	C12orf5	0.444103	1.90265e-13
ENSG00000128573.18	FOXP2	0.355536	1.99666e-13
ENSG00000151503.8	NCAPD3	-0.262038	2.02616e-13
ENSG00000128050.4	PAICS	-0.323854	2.02616e-13
ENSG00000196584.2	XRCC2	-0.360427	2.22574e-13
ENSG00000071539.9	TRIP13	-0.333685	2.25637e-13
ENSG00000121152.5	NCAPH	-0.31817	2.30335e-13
ENSG00000256897.1	RP11-17G12.2	0.857362	2.41653e-13
ENSG00000057657.10	PRDM1	0.75593	2.46762e-13
ENSG00000135862.5	LAMC1	-0.390981	2.52295e-13
ENSG00000257151.1	PWAR6	0.599142	2.5647e-13
ENSG00000196975.10	ANXA4	0.3786	2.59145e-13
ENSG00000178999.8	AURKB	-0.379932	2.60229e-13
ENSG00000146281.5	PM20D2	-0.399514	2.70056e-13
ENSG00000152253.4	SPC25	-0.413929	2.78579e-13
ENSG00000101224.13	CDC25B	-0.385559	2.88505e-13
ENSG00000160013.4	PTGIR	0.542985	2.91774e-13
ENSG00000105281.8	SLC1A5	-0.411482	2.95653e-13
ENSG00000132718.7	SYT11	-0.733986	3.00473e-13
ENSG00000092036.12	HAUS4	-0.371339	3.1211e-13
ENSG00000123685.4	BATF3	-1.13789	3.2854e-13
ENSG00000131171.8	SH3BGRL	0.39803	3.29309e-13
ENSG00000184162.10	NR2C2AP	-0.410018	3.31742e-13
ENSG00000013364.14	MVP	0.43628	3.32102e-13
ENSG00000108671.5	PSMD11	-0.308142	3.60645e-13
ENSG00000250337.1	LINC01021	0.949067	3.69961e-13
ENSG00000073146.11	MOV10L1	0.764743	3.96935e-13
ENSG00000137812.15	CASC5	-0.377319	5.14632e-13
ENSG00000185189.11	NRBP2	0.396695	5.25918e-13
ENSG00000170779.10	CDCA4	-0.341926	6.35058e-13
ENSG00000205592.9	MUC19	0.393336	6.44505e-13
ENSG00000165175.11	MID1IP1	-0.442748	6.77364e-13
ENSG00000111602.7	TIMELESS	-0.345027	6.89417e-13
ENSG00000010310.4	GIPR	0.51323	6.89417e-13
ENSG00000140525.13	FANCI	-0.279913	7.96154e-13
ENSG00000116991.6	SIPA1L2	0.430276	8.07119e-13
ENSG00000111665.7	CDCA3	-0.388514	8.07714e-13
ENSG00000168439.12	STIP1	-0.360343	8.17106e-13
ENSG00000143870.8	PDIA6	-0.30904	8.22465e-13
ENSG00000105173.9	CCNE1	-0.379824	9.03713e-13
ENSG00000184939.11	ZFP90	0.398582	9.31919e-13
ENSG00000128245.10	YWHAH	-0.328314	9.50633e-13
ENSG00000166159.6	LRTM2	0.845444	1.01324e-12
ENSG00000168778.7	TCTN2	-0.591362	1.01405e-12
ENSG00000120253.9	NUP43	-0.306254	1.01949e-12
ENSG00000215030.4	RPL13P12	-0.634968	1.20087e-12
ENSG00000099958.10	DERL3	-0.49255	1.20532e-12
ENSG00000226084.4	RP4-706A16.3	-0.824072	1.26344e-12
ENSG00000144712.7	CAND2	-0.915053	1.26426e-12
ENSG00000104341.12	LAPTM4B	-0.519928	1.32052e-12
ENSG00000170515.9	PA2G4	-0.335267	1.38528e-12
ENSG00000235865.2	GSN-AS1	0.586851	1.44007e-12
ENSG00000113407.9	TARS	-0.358476	1.45628e-12
ENSG00000146918.15	NCAPG2	-0.28509	1.45628e-12
ENSG00000182796.8	TMEM198B	0.478713	1.52533e-12
ENSG00000139645.9	ANKRD52	-0.304706	1.56505e-12
ENSG00000107863.12	ARHGAP21	-0.480358	1.56505e-12
ENSG00000144136.6	SLC20A1	-0.273394	1.71695e-12
ENSG00000088812.13	ATRN	0.24073	1.72839e-12
ENSG00000100055.16	CYTH4	0.371539	1.89907e-12
ENSG00000109906.9	ZBTB16	-0.643647	1.89907e-12
ENSG00000148680.11	HTR7	0.451909	1.91132e-12
ENSG00000175643.7	RMI2	-0.384745	1.91132e-12
ENSG00000221963.5	APOL6	-0.492202	2.23799e-12
ENSG00000200913.1	SNORD46	-0.869331	2.30712e-12
ENSG00000196295.7	AC005154.6	0.334481	2.3582e-12
ENSG00000144554.6	FANCD2	-0.276772	2.47219e-12
ENSG00000143486.11	EIF2D	-0.342721	2.52978e-12
ENSG00000173559.8	NABP1	0.422321	2.70081e-12
ENSG00000174083.13	PIK3R6	0.652661	3.0723e-12
ENSG00000040275.12	SPDL1	-0.350443	3.15037e-12
ENSG00000185567.6	AHNAK2	0.628574	3.35813e-12
ENSG00000159055.3	MIS18A	-0.411776	3.5243e-12
ENSG00000167900.7	TK1	-0.386788	3.83029e-12
ENSG00000242258.1	LINC00996	0.381	3.8964e-12
ENSG00000166851.10	PLK1	-0.365337	4.05016e-12
ENSG00000161544.5	CYGB	1.78669	4.22092e-12
ENSG00000065989.11	PDE4A	-0.600773	4.66234e-12
ENSG00000171208.5	NETO2	-0.313435	4.76049e-12
ENSG00000139579.8	NABP2	-0.350674	4.82524e-12
ENSG00000189067.8	LITAF	-0.520664	4.82524e-12
ENSG00000135736.5	CCDC102A	-0.704817	4.84566e-12
ENSG00000075131.5	TIPIN	-0.399458	4.84722e-12
ENSG00000132549.14	VPS13B	0.308762	5.03576e-12
ENSG00000205208.4	C4orf46	-0.400002	5.44342e-12
ENSG00000145882.6	PCYOX1L	0.338781	5.70397e-12
ENSG00000104687.8	GSR	-0.333386	5.76294e-12
ENSG00000204131.6	NHSL2	0.646629	6.02236e-12
ENSG00000127423.6	AUNIP	-0.48124	6.08018e-12
ENSG00000107796.8	ACTA2	1.17897	6.12867e-12
ENSG00000166341.6	DCHS1	0.780214	6.16122e-12
ENSG00000168671.5	UGT3A2	-1.21977	6.16122e-12
ENSG00000117632.16	STMN1	-0.30504	6.31704e-12
ENSG00000095485.12	CWF19L1	-0.311498	6.69154e-12
ENSG00000130713.11	EXOSC2	-0.303625	6.6965e-12
ENSG00000051108.10	HERPUD1	-0.285328	6.6965e-12
ENSG00000157212.14	PAXIP1	-0.293688	7.06028e-12
ENSG00000246877.1	DNM1P35	0.470078	7.24975e-12
ENSG00000166927.8	MS4A7	0.380603	7.31056e-12
ENSG00000118855.14	MFSD1	0.300319	8.20558e-12
ENSG00000075218.14	GTSE1	-0.299123	8.46961e-12
ENSG00000103056.7	SMPD3	0.50355	8.46961e-12
ENSG00000149503.8	INCENP	-0.375558	9.00096e-12
ENSG00000214787.4	MS4A4E	0.496906	9.28426e-12
ENSG00000127585.7	FBXL16	1.01364	9.30974e-12
ENSG00000062524.11	LTK	0.572081	9.50032e-12
ENSG00000176533.8	GNG7	0.41519	9.51086e-12
ENSG00000148019.8	CEP78	-0.322278	9.57884e-12
ENSG00000108106.9	UBE2S	-0.404709	1.00815e-11
ENSG00000108852.10	MPP2	-0.748308	1.05217e-11
ENSG00000170345.5	FOS	0.495731	1.06343e-11
ENSG00000160072.15	ATAD3B	-0.304831	1.11732e-11
ENSG00000127824.9	TUBA4A	-0.425542	1.1233e-11
ENSG00000035115.17	SH3YL1	0.333809	1.17312e-11
ENSG00000162073.9	PAQR4	-0.366712	1.17864e-11
ENSG00000089847.8	ANKRD24	0.792466	1.25265e-11
ENSG00000071626.12	DAZAP1	-0.264926	1.26873e-11
ENSG00000152784.11	PRDM8	-0.423177	1.27058e-11
ENSG00000173890.12	GPR160	0.371373	1.27249e-11
ENSG00000143575.10	HAX1	-0.388602	1.32191e-11
ENSG00000115806.8	GORASP2	-0.295153	1.35083e-11
ENSG00000147155.6	EBP	-0.417783	1.3566e-11
ENSG00000197697.3	HIST1H2BE	-0.402834	1.42282e-11
ENSG00000135476.7	ESPL1	-0.324943	1.4692e-11
ENSG00000100448.3	CTSG	-0.40482	1.47999e-11
ENSG00000151632.12	AKR1C2	-1.22375	1.47999e-11
ENSG00000197122.7	SRC	0.509786	1.54067e-11
ENSG00000011600.7	TYROBP	0.462449	1.59583e-11
ENSG00000166965.8	RCCD1	-0.310804	1.69192e-11
ENSG00000125827.4	TMX4	-0.351286	1.75265e-11
ENSG00000185753.8	CXorf38	0.360736	1.78754e-11
ENSG00000244716.2	RP11-20O24.4	-0.902965	1.81072e-11
ENSG00000113456.14	RAD1	-0.322187	1.82247e-11
ENSG00000101210.6	EEF1A2	-0.361797	1.83605e-11
ENSG00000125885.9	MCM8	-0.309457	1.83777e-11
ENSG00000196576.10	PLXNB2	0.36237	2.07656e-11
ENSG00000176619.6	LMNB2	-0.356681	2.10299e-11
ENSG00000112759.12	SLC29A1	-0.414784	2.21764e-11
ENSG00000181666.13	HKR1	0.284817	2.23108e-11
ENSG00000109881.12	CCDC34	-0.448782	2.37583e-11
ENSG00000120008.11	WDR11	0.272344	2.51062e-11
ENSG00000156042.13	TTC18	0.940428	2.61328e-11
ENSG00000133048.8	CHI3L1	-0.483947	2.64298e-11
ENSG00000110917.3	MLEC	-0.245292	2.82709e-11
ENSG00000130309.6	COLGALT1	-0.311484	2.83067e-11
ENSG00000132386.6	SERPINF1	0.408108	2.91978e-11
ENSG00000101447.9	FAM83D	-0.318065	2.9665e-11
ENSG00000164649.15	CDCA7L	-0.287226	3.01444e-11
ENSG00000174125.3	TLR1	0.512773	3.34025e-11
ENSG00000109667.7	SLC2A9	0.362412	3.34393e-11
ENSG00000049541.6	RFC2	-0.325303	3.54982e-11
ENSG00000119333.7	WDR34	-0.431792	3.6566e-11
ENSG00000165244.6	ZNF367	-0.375178	3.80901e-11
ENSG00000177272.7	KCNA3	-0.625833	3.80931e-11
ENSG00000070814.13	TCOF1	-0.322508	3.85144e-11
ENSG00000178921.9	PFAS	-0.314838	3.85258e-11
ENSG00000095002.8	MSH2	-0.358992	3.91874e-11
ENSG00000070614.10	NDST1	-0.627554	3.96402e-11
ENSG00000088247.11	KHSRP	-0.283098	4.03384e-11
ENSG00000101342.5	TLDC2	0.617417	4.16534e-11
ENSG00000111581.5	NUP107	-0.294492	4.16534e-11
ENSG00000250138.3	RP11-848G14.5	0.534699	4.2736e-11
ENSG00000134222.12	PSRC1	-0.446185	4.27653e-11
ENSG00000131351.10	HAUS8	-0.387701	4.36117e-11
ENSG00000159873.5	CCDC117	-0.329698	4.48076e-11
ENSG00000110660.10	SLC35F2	-0.52167	4.63128e-11
ENSG00000102524.7	TNFSF13B	0.385435	4.66399e-11
ENSG00000136982.5	DSCC1	-0.381965	4.74794e-11
ENSG00000169683.3	LRRC45	-0.36551	4.97937e-11
ENSG00000149636.11	DSN1	-0.330016	5.05863e-11
ENSG00000009413.11	REV3L	0.324783	5.09893e-11
ENSG00000162783.8	IER5	0.382833	5.13748e-11
ENSG00000100162.10	CENPM	-0.331372	5.25606e-11
ENSG00000005108.11	THSD7A	0.346182	5.28603e-11
ENSG00000114126.13	TFDP2	-0.410375	5.30557e-11
ENSG00000116161.13	CACYBP	-0.332124	5.30557e-11
ENSG00000109084.9	TMEM97	-0.293313	5.43647e-11
ENSG00000042832.7	TG	1.21963	5.54023e-11
ENSG00000113569.11	NUP155	-0.258075	5.65891e-11
ENSG00000131944.5	C19orf40	-0.501876	5.84934e-11
ENSG00000196547.10	MAN2A2	0.313169	6.02977e-11
ENSG00000132002.3	DNAJB1	-0.320883	6.05834e-11
ENSG00000071054.11	MAP4K4	0.245576	6.1875e-11
ENSG00000144580.9	RQCD1	-0.239525	6.20714e-11
ENSG00000224982.2	TMEM233	0.31687	6.21845e-11
ENSG00000130517.9	PGPEP1	0.275076	6.51401e-11
ENSG00000184661.9	CDCA2	-0.286112	6.64714e-11
ENSG00000060982.10	BCAT1	-0.347363	6.65155e-11
ENSG00000130518.12	KIAA1683	0.442459	6.69391e-11
ENSG00000104889.4	RNASEH2A	-0.35726	7.06954e-11
ENSG00000104964.10	AES	-0.416866	7.20168e-11
ENSG00000127022.10	CANX	-0.260112	8.23158e-11
ENSG00000124766.4	SOX4	0.259176	8.23158e-11
ENSG00000051341.9	POLQ	-0.296757	8.51186e-11
ENSG00000256655.1	TMEM75	0.519198	8.54247e-11
ENSG00000159335.11	PTMS	-0.796302	8.64331e-11
ENSG00000221914.4	PPP2R2A	-0.255939	8.65812e-11
ENSG00000164109.9	MAD2L1	-0.364852	8.6907e-11
ENSG00000127564.12	PKMYT1	-0.374347	8.76031e-11
ENSG00000197746.9	PSAP	0.321379	9.30005e-11
ENSG00000126351.8	THRA	-0.373441	9.68043e-11
ENSG00000136286.10	MYO1G	0.320138	9.68043e-11
ENSG00000137404.10	NRM	-0.409913	9.89111e-11
ENSG00000012660.9	ELOVL5	-0.262361	1.06118e-10
ENSG00000170275.10	CRTAP	-0.314681	1.06184e-10
ENSG00000134690.6	CDCA8	-0.350126	1.09411e-10
ENSG00000000460.12	C1orf112	-0.351606	1.09931e-10
ENSG00000228526.2	RP3-510D11.1	1.19744	1.09931e-10
ENSG00000124610.3	HIST1H1A	-0.522272	1.09931e-10
ENSG00000113048.12	MRPS27	-0.259374	1.10545e-10
ENSG00000198554.7	WDHD1	-0.320248	1.10889e-10
ENSG00000166501.8	PRKCB	0.251155	1.1715e-10
ENSG00000145428.10	RNF175	0.506265	1.20185e-10
ENSG00000183955.8	SETD8	-0.283002	1.22464e-10
ENSG00000069482.6	GAL	-0.465852	1.26336e-10
ENSG00000139734.13	DIAPH3	-0.339956	1.2648e-10
ENSG00000165181.12	C9orf84	1.06342	1.27131e-10
ENSG00000270704.2	SNORD64	0.668604	1.3198e-10
ENSG00000075399.8	VPS9D1	0.392475	1.37135e-10
ENSG00000074966.6	TXK	0.645305	1.37873e-10
ENSG00000109971.9	HSPA8	-0.292572	1.46146e-10
ENSG00000100219.12	XBP1	-0.331324	1.47884e-10
ENSG00000153944.6	MSI2	0.33066	1.47884e-10
ENSG00000185379.16	RAD51D	-0.427032	1.51667e-10
ENSG00000135749.14	PCNXL2	0.5244	1.54002e-10
ENSG00000188610.8	FAM72B	-0.436492	1.54469e-10
ENSG00000178752.11	FAM132B	-0.770168	1.61598e-10
ENSG00000063601.12	MTMR1	-0.46376	1.63423e-10
ENSG00000164466.8	SFXN1	-0.252584	1.65999e-10
ENSG00000271347.1	RP11-701H24.7	0.871091	1.69886e-10
ENSG00000107738.15	C10orf54	0.373389	1.71343e-10
ENSG00000010404.13	IDS	0.383374	1.72234e-10
ENSG00000120438.7	TCP1	-0.246487	1.74026e-10
ENSG00000082397.11	EPB41L3	0.292687	1.77231e-10
ENSG00000182511.7	FES	0.312379	1.78081e-10
ENSG00000168393.8	DTYMK	-0.327653	1.78081e-10
ENSG00000122034.8	GTF3A	0.307172	1.91426e-10
ENSG00000167747.9	C19orf48	-0.330289	1.95224e-10
ENSG00000142945.8	KIF2C	-0.292977	1.95476e-10
ENSG00000143401.10	ANP32E	-0.379806	1.98081e-10
ENSG00000142686.7	C1orf216	-0.37012	2.12692e-10
ENSG00000179406.6	LINC00174	0.606861	2.15801e-10
ENSG00000151065.9	DCP1B	0.346674	2.23445e-10
ENSG00000198830.6	HMGN2	-0.236261	2.23445e-10
ENSG00000151490.9	PTPRO	0.825486	2.33821e-10
ENSG00000136960.8	ENPP2	0.35078	2.33821e-10
ENSG00000174996.7	KLC2	-0.565466	2.36286e-10
ENSG00000167004.8	PDIA3	-0.263518	2.5992e-10
ENSG00000184357.3	HIST1H1B	-0.377372	2.61238e-10
ENSG00000100714.11	MTHFD1	-0.270523	2.62324e-10
ENSG00000109674.3	NEIL3	-0.339762	2.62754e-10
ENSG00000221829.5	FANCG	-0.313398	2.77545e-10
ENSG00000072135.8	PTPN18	-0.264318	2.82379e-10
ENSG00000212802.3	RPL15P3	-0.838413	2.83277e-10
ENSG00000104635.9	SLC39A14	-0.244919	2.88404e-10
ENSG00000151914.13	DST	0.426884	2.96996e-10
ENSG00000164620.4	RELL2	0.338564	3.04959e-10
ENSG00000204406.7	MBD5	0.432981	3.11912e-10
ENSG00000073464.7	CLCN4	0.438631	3.19035e-10
ENSG00000129003.11	VPS13C	0.369583	3.21914e-10
ENSG00000144381.12	HSPD1	-0.265843	3.2269e-10
ENSG00000156521.9	TYSND1	-0.412791	3.45152e-10
ENSG00000179409.6	GEMIN4	-0.327789	3.57148e-10
ENSG00000181472.4	ZBTB2	-0.348567	3.70966e-10
ENSG00000247077.2	PGAM5	-0.328253	3.72782e-10
ENSG00000130164.7	LDLR	-0.307439	3.75908e-10
ENSG00000026559.9	KCNG1	-0.582458	3.76351e-10
ENSG00000171791.10	BCL2	-0.241061	3.78739e-10
ENSG00000100401.15	RANGAP1	-0.29379	3.84933e-10
ENSG00000163918.6	RFC4	-0.322543	3.94479e-10
ENSG00000100599.11	RIN3	0.433361	3.94893e-10
ENSG00000179958.4	DCTPP1	-0.344138	4.16073e-10
ENSG00000214021.11	TTLL3	0.332956	4.28261e-10
ENSG00000013810.14	TACC3	-0.301621	4.38167e-10
ENSG00000185818.7	NAT8L	-0.459072	4.61298e-10
ENSG00000133065.6	SLC41A1	-0.484947	4.78335e-10
ENSG00000166986.8	MARS	-0.337929	4.80468e-10
ENSG00000112473.12	SLC39A7	-0.325984	4.85472e-10
ENSG00000196628.9	TCF4	0.311936	4.88495e-10
ENSG00000198954.4	KIAA1279	-0.382995	4.95371e-10
ENSG00000154146.8	NRGN	-0.404866	5.00844e-10
ENSG00000100526.15	CDKN3	-0.370934	5.0558e-10
ENSG00000221821.2	C6orf226	0.626032	5.0659e-10
ENSG00000141551.10	CSNK1D	-0.308306	5.17063e-10
ENSG00000169884.9	WNT10B	-0.396357	5.22221e-10
ENSG00000112367.6	FIG4	0.33601	5.26003e-10
ENSG00000196743.4	GM2A	0.293323	5.26003e-10
ENSG00000186283.9	TOR3A	-0.329538	5.55568e-10
ENSG00000224635.1	RP4-564F22.5	-0.771746	5.58647e-10
ENSG00000164754.8	RAD21	-0.292415	6.00186e-10
ENSG00000105968.14	H2AFV	-0.257281	6.04755e-10
ENSG00000043355.6	ZIC2	-0.535431	6.19728e-10
ENSG00000251795.1	SNORA66	-1.00356	6.27109e-10
ENSG00000246263.2	KB-431C1.4	0.485904	6.30773e-10
ENSG00000213240.7	NOTCH2NL	0.41252	6.31786e-10
ENSG00000166133.13	RPUSD2	-0.41184	6.35667e-10
ENSG00000003402.15	CFLAR	0.230303	6.42196e-10
ENSG00000117407.12	ARTN	0.513543	6.55745e-10
ENSG00000198176.8	TFDP1	-0.248888	6.60655e-10
ENSG00000119318.8	RAD23B	-0.241698	6.82722e-10
ENSG00000136367.12	ZFHX2	0.496908	7.01671e-10
ENSG00000175274.14	TP53I11	-0.499307	7.1318e-10
ENSG00000137474.15	MYO7A	0.394964	7.20839e-10
ENSG00000125772.8	GPCPD1	0.30169	7.23452e-10
ENSG00000089327.10	FXYD5	-0.434112	7.49689e-10
ENSG00000153885.10	KCTD15	-0.31881	7.51697e-10
ENSG00000149257.9	SERPINH1	-0.347469	7.51697e-10
ENSG00000114204.10	SERPINI2	0.627506	7.59292e-10
ENSG00000165490.8	C11orf82	-0.374307	7.62409e-10
ENSG00000160752.10	FDPS	-0.324611	7.64217e-10
ENSG00000267702.1	RP11-53B2.2	0.472715	7.64217e-10
ENSG00000172954.9	LCLAT1	-0.400687	7.64732e-10
ENSG00000163808.12	KIF15	-0.292622	7.76365e-10
ENSG00000065911.7	MTHFD2	-0.318303	7.79424e-10
ENSG00000123933.10	MXD4	0.365853	8.10114e-10
ENSG00000166949.11	SMAD3	0.252984	8.42213e-10
ENSG00000096433.6	ITPR3	-0.493685	8.80744e-10
ENSG00000070081.11	NUCB2	-0.27528	9.00547e-10
ENSG00000167614.9	TTYH1	0.417571	9.15694e-10
ENSG00000131462.3	TUBG1	-0.349173	9.42802e-10
ENSG00000145819.11	ARHGAP26	0.262545	1.00133e-09
ENSG00000149136.3	SSRP1	-0.306145	1.01623e-09
ENSG00000100197.16	CYP2D6	0.65379	1.0168e-09
ENSG00000025708.8	TYMP	0.39854	1.0462e-09
ENSG00000249353.2	NPM1P27	-0.295603	1.06471e-09
ENSG00000100221.6	JOSD1	-0.300291	1.08498e-09
ENSG00000176087.10	SLC35A4	-0.308817	1.10506e-09
ENSG00000070950.5	RAD18	-0.284656	1.15828e-09
ENSG00000184886.3	PIGW	-0.386978	1.18824e-09
ENSG00000163950.8	SLBP	-0.270061	1.19017e-09
ENSG00000124151.14	NCOA3	0.26232	1.1968e-09
ENSG00000163867.12	ZMYM6	0.434728	1.20077e-09
ENSG00000124145.5	SDC4	-0.971774	1.20677e-09
ENSG00000140743.3	CDR2	-0.381358	1.23638e-09
ENSG00000180071.14	ANKRD18A	0.372822	1.24011e-09
ENSG00000163171.6	CDC42EP3	-0.299286	1.2406e-09
ENSG00000141506.9	PIK3R5	0.275766	1.26579e-09
ENSG00000112984.7	KIF20A	-0.320695	1.27354e-09
ENSG00000137807.9	KIF23	-0.277864	1.27926e-09
ENSG00000245532.4	NEAT1	0.80543	1.2951e-09
ENSG00000139278.5	GLIPR1	0.339794	1.29687e-09
ENSG00000166598.8	HSP90B1	-0.269055	1.34387e-09
ENSG00000140284.6	SLC27A2	-0.666116	1.35365e-09
ENSG00000068489.8	PRR11	-0.260382	1.40731e-09
ENSG00000119711.8	ALDH6A1	0.321078	1.41723e-09
ENSG00000117280.8	RAB7L1	-0.348684	1.42465e-09
ENSG00000151725.7	MLF1IP	-0.300664	1.47952e-09
ENSG00000149929.11	HIRIP3	-0.375659	1.48574e-09
ENSG00000079277.15	MKNK1	0.241927	1.52334e-09
ENSG00000102054.13	RBBP7	-0.285095	1.53091e-09
ENSG00000197142.6	ACSL5	-0.327737	1.56432e-09
ENSG00000140044.8	JDP2	-0.608789	1.60819e-09
ENSG00000225345.3	SNX18P3	0.453146	1.67993e-09
ENSG00000097046.8	CDC7	-0.34119	1.79692e-09
ENSG00000203760.4	CENPW	-0.37776	1.8351e-09
ENSG00000100320.18	RBFOX2	-0.659865	1.85154e-09
ENSG00000124789.7	NUP153	-0.226343	2.0162e-09
ENSG00000070669.12	ASNS	-0.36903	2.01697e-09
ENSG00000196419.8	XRCC6	-0.255548	2.01697e-09
ENSG00000128928.4	IVD	0.245535	2.01789e-09
ENSG00000181026.13	AEN	0.257226	2.07399e-09
ENSG00000085999.7	RAD54L	-0.30474	2.14094e-09
ENSG00000089916.13	GPATCH2L	0.251133	2.19673e-09
ENSG00000165152.4	TMEM246	-0.420759	2.28395e-09
ENSG00000182378.8	PLCXD1	-0.331258	2.3255e-09
ENSG00000128951.9	DUT	-0.275812	2.3283e-09
ENSG00000235174.1	RPL39P3	-0.677045	2.34814e-09
ENSG00000167553.10	TUBA1C	-0.337834	2.40609e-09
ENSG00000255833.1	TIFAB	0.284699	2.55715e-09
ENSG00000101811.9	CSTF2	-0.344982	2.6096e-09
ENSG00000184840.7	TMED9	-0.302486	2.6096e-09
ENSG00000103018.12	CYB5B	-0.256721	2.6149e-09
ENSG00000027001.7	MIPEP	-0.390022	2.64967e-09
ENSG00000196550.6	FAM72A	-0.411526	2.90722e-09
ENSG00000160298.13	C21orf58	-0.288573	3.13222e-09
ENSG00000091651.4	ORC6	-0.298126	3.21866e-09
ENSG00000158517.9	NCF1	0.587103	3.24288e-09
ENSG00000215021.4	PHB2	-0.280185	3.32853e-09
ENSG00000077514.4	POLD3	-0.255598	3.34453e-09
ENSG00000215068.3	AC025171.1	0.395187	3.40781e-09
ENSG00000099901.12	RANBP1	-0.266597	3.41885e-09
ENSG00000127311.5	HELB	0.312102	3.50182e-09
ENSG00000125319.10	C17orf53	-0.401784	3.50626e-09
ENSG00000132780.12	NASP	-0.241122	3.53342e-09
ENSG00000043143.16	PHF15	-0.274053	3.56331e-09
ENSG00000123136.10	DDX39A	-0.288933	3.58287e-09
ENSG00000072501.13	SMC1A	-0.260624	3.59634e-09
ENSG00000110665.7	C11orf21	0.334312	3.74368e-09
ENSG00000168675.14	LDLRAD4	0.284369	3.83374e-09
ENSG00000101336.8	HCK	0.280432	3.90097e-09
ENSG00000233762.2	AC007969.5	-0.868333	3.95454e-09
ENSG00000130635.11	COL5A1	1.32153	3.98201e-09
ENSG00000267100.1	ILF3-AS1	-0.348003	4.00647e-09
ENSG00000009954.6	BAZ1B	-0.20882	4.13474e-09
ENSG00000162849.11	KIF26B	0.403943	4.28196e-09
ENSG00000076356.6	PLXNA2	0.839427	4.38985e-09
ENSG00000268798.1	AC027307.3	-0.953539	4.41816e-09
ENSG00000128595.12	CALU	-0.25993	4.49525e-09
ENSG00000100591.3	AHSA1	-0.282529	4.50859e-09
ENSG00000121064.8	SCPEP1	0.305545	4.80876e-09
ENSG00000103313.7	MEFV	0.405635	4.89356e-09
ENSG00000165724.5	ZMYND19	-0.312323	4.97225e-09
ENSG00000222501.1	RNU4-25P	0.687901	5.0284e-09
ENSG00000112039.3	FANCE	-0.330669	5.0727e-09
ENSG00000238164.2	RP3-395M20.8	0.690574	5.09209e-09
ENSG00000184702.13	SEPT5	-1.31232	5.13005e-09
ENSG00000136868.9	SLC31A1	-0.301522	5.13104e-09
ENSG00000130816.10	DNMT1	-0.262008	5.43775e-09
ENSG00000065809.9	FAM107B	-0.261797	5.47064e-09
ENSG00000264364.2	DYNLL2	-0.254959	5.69556e-09
ENSG00000110324.5	IL10RA	0.380509	5.74348e-09
ENSG00000160219.7	GAB3	0.311155	6.05502e-09
ENSG00000171115.3	GIMAP8	0.461124	6.06205e-09
ENSG00000166123.9	GPT2	-0.280253	6.067e-09
ENSG00000155858.5	LSM11	-0.373606	6.2868e-09
ENSG00000123416.11	TUBA1B	-0.335904	6.29234e-09
ENSG00000142230.7	SAE1	-0.242624	6.39844e-09
ENSG00000116852.10	KIF21B	-0.329225	6.42765e-09
ENSG00000224818.1	RP11-134G8.8	0.753652	6.4763e-09
ENSG00000137462.6	TLR2	0.255865	6.49097e-09
ENSG00000166226.8	CCT2	-0.253372	6.61062e-09
ENSG00000132514.9	CLEC10A	0.600931	6.62988e-09
ENSG00000183688.4	FAM101B	-0.228785	6.7106e-09
ENSG00000206053.8	HN1L	-0.25631	6.87399e-09
ENSG00000164104.7	HMGB2	-0.271943	6.96503e-09
ENSG00000175063.12	UBE2C	-0.324815	7.04286e-09
ENSG00000189060.4	H1F0	-0.503856	7.34184e-09
ENSG00000171241.4	SHCBP1	-0.285819	7.35605e-09
ENSG00000107077.13	KDM4C	0.266495	7.46629e-09
ENSG00000082146.8	STRADB	-0.3862	7.48249e-09
ENSG00000101901.6	ALG13	0.306917	7.50217e-09
ENSG00000145604.11	SKP2	-0.273388	7.8335e-09
ENSG00000147697.4	GSDMC	1.03862	8.08342e-09
ENSG00000075702.12	WDR62	-0.279677	8.1623e-09
ENSG00000257167.2	TMPO-AS1	-0.320149	8.72111e-09
ENSG00000250321.1	RP11-478C6.4	-0.939505	8.92932e-09
ENSG00000147324.6	MFHAS1	-0.270079	9.06709e-09
ENSG00000158106.8	RHPN1	0.376519	9.15059e-09
ENSG00000172890.7	NADSYN1	0.267563	9.35086e-09
ENSG00000166313.14	APBB1	-0.486372	9.95575e-09
ENSG00000213551.4	DNAJC9	-0.31085	1.00495e-08
ENSG00000051596.5	THOC3	-0.329095	1.00495e-08
ENSG00000106868.12	SUSD1	0.23829	1.01257e-08
ENSG00000145348.12	TBCK	0.309493	1.02552e-08
ENSG00000126759.8	CFP	0.429718	1.04854e-08
ENSG00000129810.10	SGOL1	-0.380411	1.08094e-08
ENSG00000076242.10	MLH1	-0.273039	1.11039e-08
ENSG00000005801.12	ZNF195	0.267013	1.12192e-08
ENSG00000188738.9	FSIP2	0.830916	1.16048e-08
ENSG00000189298.9	ZKSCAN3	0.338203	1.18873e-08
ENSG00000035499.8	DEPDC1B	-0.344292	1.24278e-08
ENSG00000133169.5	BEX1	0.281169	1.24451e-08
ENSG00000114850.2	SSR3	-0.255707	1.24703e-08
ENSG00000197872.7	FAM49A	0.37462	1.28416e-08
ENSG00000176974.13	SHMT1	-0.291628	1.28613e-08
ENSG00000127603.19	MACF1	0.236233	1.29638e-08
ENSG00000184937.8	WT1	-0.280208	1.30748e-08
ENSG00000188559.9	RALGAPA2	0.244522	1.30874e-08
ENSG00000130066.12	SAT1	0.383677	1.30874e-08
ENSG00000231535.1	LINC00278	0.869657	1.33766e-08
ENSG00000134333.9	LDHA	-0.253822	1.35355e-08
ENSG00000144401.10	METTL21A	-0.311068	1.36076e-08
ENSG00000105323.12	HNRNPUL1	-0.250499	1.39729e-08
ENSG00000142731.6	PLK4	-0.318547	1.4289e-08
ENSG00000167842.11	MIS12	-0.315932	1.46346e-08
ENSG00000156931.11	VPS8	0.264098	1.48389e-08
ENSG00000228716.2	DHFR	-0.306381	1.48776e-08
ENSG00000135829.12	DHX9	-0.216856	1.49948e-08
ENSG00000126803.8	HSPA2	-0.480722	1.51398e-08
ENSG00000132773.7	TOE1	-0.370218	1.52233e-08
ENSG00000135378.3	PRRG4	-0.347525	1.54507e-08
ENSG00000090889.10	KIF4A	-0.264618	1.56665e-08
ENSG00000162623.11	TYW3	-0.361283	1.62245e-08
ENSG00000017427.11	IGF1	0.594275	1.62447e-08
ENSG00000094914.8	AAAS	-0.296692	1.62905e-08
ENSG00000130714.11	POMT1	0.337196	1.64379e-08
ENSG00000110042.3	DTX4	0.320166	1.67853e-08
ENSG00000136518.12	ACTL6A	-0.262687	1.80663e-08
ENSG00000134627.7	PIWIL4	0.222156	1.82509e-08
ENSG00000156471.8	PTDSS1	-0.228963	1.86096e-08
ENSG00000198937.8	CCDC167	-0.478469	1.88532e-08
ENSG00000178719.12	GRINA	0.345497	1.88532e-08
ENSG00000179855.5	GIPC3	-0.877314	1.91462e-08
ENSG00000084092.6	NOA1	-0.303155	1.98768e-08
ENSG00000057252.8	SOAT1	-0.316171	2.03074e-08
ENSG00000176422.10	SPRYD4	-0.353839	2.0955e-08
ENSG00000136169.12	SETDB2	0.256088	2.09619e-08
ENSG00000197409.6	HIST1H3D	-0.33307	2.09905e-08
ENSG00000197965.7	MPZL1	0.246187	2.10483e-08
ENSG00000136699.15	SMPD4	-0.278641	2.18352e-08
ENSG00000173692.8	PSMD1	-0.239614	2.26573e-08
ENSG00000158402.14	CDC25C	-0.337495	2.2797e-08
ENSG00000239665.4	RP11-295P9.3	0.316517	2.2813e-08
ENSG00000251288.2	RP11-10L12.2	0.64846	2.29733e-08
ENSG00000132436.7	FIGNL1	-0.291518	2.29733e-08
ENSG00000169689.10	STRA13	-0.310967	2.30294e-08
ENSG00000181163.9	NPM1	-0.268081	2.32976e-08
ENSG00000174442.7	ZWILCH	-0.337599	2.33977e-08
ENSG00000093000.14	NUP50	-0.234504	2.34874e-08
ENSG00000197299.6	BLM	-0.24417	2.39934e-08
ENSG00000207110.1	RNU1-106P	0.673164	2.42309e-08
ENSG00000186871.5	ERCC6L	-0.383086	2.45836e-08
ENSG00000163386.16	NBPF10	0.326258	2.59952e-08
ENSG00000126453.5	BCL2L12	-0.27348	2.70272e-08
ENSG00000235823.1	LINC00263	-0.569467	2.81244e-08
ENSG00000132600.12	PRMT7	0.287747	2.82516e-08
ENSG00000171824.9	EXOSC10	-0.235906	2.85775e-08
ENSG00000064201.11	TSPAN32	0.322692	3.01117e-08
ENSG00000197837.3	HIST4H4	-0.397225	3.01117e-08
ENSG00000102974.10	CTCF	-0.255058	3.01939e-08
ENSG00000164010.9	ERMAP	0.311354	3.11227e-08
ENSG00000029153.10	ARNTL2	-0.644296	3.14337e-08
ENSG00000130741.6	EIF2S3	-0.230818	3.14865e-08
ENSG00000185420.14	SMYD3	0.227832	3.1586e-08
ENSG00000170889.9	RPS9	-0.332558	3.22532e-08
ENSG00000152104.7	PTPN14	0.22819	3.25195e-08
ENSG00000163781.8	TOPBP1	-0.236437	3.41757e-08
ENSG00000204832.5	ST8SIA6-AS1	1.07639	3.48842e-08
ENSG00000105849.5	TWISTNB	-0.380818	3.51391e-08
ENSG00000143110.7	C1orf162	0.288839	3.51391e-08
ENSG00000117650.8	NEK2	-0.354932	3.55801e-08
ENSG00000244300.2	RP11-475N22.4	-1.11909	3.69606e-08
ENSG00000100154.10	TTC28	0.22546	3.76529e-08
ENSG00000132424.10	PNISR	0.268467	3.77684e-08
ENSG00000155380.7	SLC16A1	-0.243309	3.81473e-08
ENSG00000231889.3	TRAF3IP2-AS1	0.517347	3.84808e-08
ENSG00000186480.8	INSIG1	-0.276366	3.84808e-08
ENSG00000203392.2	AC105020.1	0.572178	3.96353e-08
ENSG00000040933.11	INPP4A	0.224294	3.98237e-08
ENSG00000135778.7	NTPCR	0.262694	4.00821e-08
ENSG00000170085.13	SIMC1	-0.248215	4.17111e-08
ENSG00000139880.15	CDH24	-0.603433	4.20112e-08
ENSG00000158805.7	ZNF276	0.28429	4.25093e-08
ENSG00000075568.12	TMEM131	0.210601	4.30663e-08
ENSG00000139266.5	MARCH9	-0.477807	4.31979e-08
ENSG00000081985.6	IL12RB2	-0.517753	4.38816e-08
ENSG00000130520.6	LSM4	-0.260966	4.38816e-08
ENSG00000156509.9	FBXO43	-0.418305	4.48997e-08
ENSG00000174547.9	MRPL11	-0.301925	4.48997e-08
ENSG00000134109.6	EDEM1	-0.200305	4.60776e-08
ENSG00000176597.7	B3GNT5	-0.442187	4.60963e-08
ENSG00000164611.8	PTTG1	-0.276623	4.63275e-08
ENSG00000239014.1	SNORD108	0.795131	4.63275e-08
ENSG00000100207.14	TCF20	-0.230216	4.69474e-08
ENSG00000048471.9	SNX29	0.297342	4.84191e-08
ENSG00000070190.8	DAPP1	0.423226	4.8908e-08
ENSG00000076554.11	TPD52	-0.3285	5.15327e-08
ENSG00000096060.10	FKBP5	-0.225679	5.16805e-08
ENSG00000171867.12	PRNP	-0.479948	5.26335e-08
ENSG00000144867.7	SRPRB	-0.248799	5.46328e-08
ENSG00000197535.10	MYO5A	0.231977	5.50764e-08
ENSG00000104774.8	MAN2B1	0.272082	5.61684e-08
ENSG00000147224.6	PRPS1	-0.278321	5.77551e-08
ENSG00000196715.5	VKORC1L1	-0.254989	5.82003e-08
ENSG00000109113.13	RAB34	-0.292591	5.9337e-08
ENSG00000143418.15	CERS2	-0.239227	5.97546e-08
ENSG00000078814.11	MYH7B	0.436046	6.00816e-08
ENSG00000173846.8	PLK3	0.444917	6.04402e-08
ENSG00000163563.7	MNDA	-0.504253	6.04402e-08
ENSG00000128408.7	RIBC2	-0.69858	6.048e-08
ENSG00000114491.9	UMPS	-0.240963	6.21391e-08
ENSG00000102893.11	PHKB	0.237921	6.21424e-08
ENSG00000225091.3	SNORA71A	-0.944167	6.33215e-08
ENSG00000170270.4	C14orf142	-0.356189	6.34728e-08
ENSG00000100749.3	VRK1	-0.30681	6.42618e-08
ENSG00000213024.6	NUP62	-0.260571	6.42618e-08
ENSG00000125817.7	CENPB	-0.273272	6.5551e-08
ENSG00000096063.10	SRPK1	-0.227714	6.57144e-08
ENSG00000086827.4	ZW10	-0.321843	6.57661e-08
ENSG00000210196.2	MT-TP	0.330595	6.62472e-08
ENSG00000142669.9	SH3BGRL3	0.320058	6.62472e-08
ENSG00000184863.6	RBM33	0.227325	6.69458e-08
ENSG00000186638.11	KIF24	-0.295004	6.69458e-08
ENSG00000127220.5	ABHD8	0.378524	6.85785e-08
ENSG00000138092.6	CENPO	-0.268136	6.9014e-08
ENSG00000160075.10	SSU72	-0.291867	6.95599e-08
ENSG00000079739.11	PGM1	-0.45759	6.99262e-08
ENSG00000162607.8	USP1	-0.299657	7.02727e-08
ENSG00000115548.12	KDM3A	0.227424	7.15158e-08
ENSG00000066044.9	ELAVL1	-0.213876	7.35754e-08
ENSG00000145569.5	FAM105A	0.293551	7.38325e-08
ENSG00000225830.6	ERCC6	0.318217	7.50776e-08
ENSG00000077152.5	UBE2T	-0.344337	7.59042e-08
ENSG00000069399.8	BCL3	0.461641	7.59042e-08
ENSG00000102977.9	ACD	-0.318262	7.75188e-08
ENSG00000138867.12	GUCD1	-0.269438	7.78999e-08
ENSG00000088305.14	DNMT3B	-0.344499	7.88193e-08
ENSG00000162631.14	NTNG1	0.778602	7.90255e-08
ENSG00000092199.13	HNRNPC	-0.227643	7.92905e-08
ENSG00000049449.4	RCN1	-0.297251	8.02226e-08
ENSG00000165732.8	DDX21	-0.238923	8.08781e-08
ENSG00000167207.7	NOD2	0.28958	8.0903e-08
ENSG00000115053.11	NCL	-0.218569	8.0903e-08
ENSG00000204388.5	HSPA1B	-0.355978	8.13843e-08
ENSG00000116701.10	NCF2	0.302758	8.14259e-08
ENSG00000053372.4	MRTO4	-0.267375	8.14259e-08
ENSG00000116396.9	KCNC4	-0.434331	8.21049e-08
ENSG00000185950.7	IRS2	-0.419652	8.22644e-08
ENSG00000214176.5	PLEKHM1P	0.322718	8.4249e-08
ENSG00000123144.6	C19orf43	-0.301504	8.47274e-08
ENSG00000123983.9	ACSL3	-0.244879	8.4819e-08
ENSG00000213047.7	DENND1B	0.319523	8.49724e-08
ENSG00000104626.10	ERI1	-0.315736	8.50162e-08
ENSG00000107130.6	NCS1	-0.27742	8.66433e-08
ENSG00000116096.5	SPR	-0.397427	8.74439e-08
ENSG00000127663.10	KDM4B	0.276742	8.91044e-08
ENSG00000148300.7	REXO4	-0.256404	8.97773e-08
ENSG00000172009.10	THOP1	-0.270681	9.02214e-08
ENSG00000165704.10	HPRT1	-0.279916	9.07749e-08
ENSG00000087269.11	NOP14	-0.23309	9.07749e-08
ENSG00000126215.9	XRCC3	-0.255591	9.28312e-08
ENSG00000117877.6	CD3EAP	-0.350813	9.3019e-08
ENSG00000181788.3	SIAH2	-0.352139	9.51676e-08
ENSG00000127586.12	CHTF18	-0.300131	9.53845e-08
ENSG00000131018.18	SYNE1	0.386467	9.58573e-08
ENSG00000143079.10	CTTNBP2NL	0.402894	9.65884e-08
ENSG00000009790.10	TRAF3IP3	0.263741	9.82138e-08
ENSG00000185658.9	BRWD1	0.268739	9.94586e-08
ENSG00000136824.14	SMC2	-0.31392	1.00989e-07
ENSG00000010361.9	FUZ	-0.428199	1.01476e-07
ENSG00000178307.5	TMEM11	-0.291234	1.02171e-07
ENSG00000168769.8	TET2	0.247254	1.05609e-07
ENSG00000172336.4	POP7	-0.317247	1.11099e-07
ENSG00000130958.7	SLC35D2	0.634673	1.11168e-07
ENSG00000071051.9	NCK2	-0.282324	1.1201e-07
ENSG00000196290.10	NIF3L1	-0.302053	1.1333e-07
ENSG00000183242.7	WT1-AS	-0.291677	1.15085e-07
ENSG00000096968.8	JAK2	0.323414	1.15811e-07
ENSG00000176871.4	WSB2	-0.272185	1.16116e-07
ENSG00000007255.6	TRAPPC6A	0.371227	1.2201e-07
ENSG00000145936.4	KCNMB1	0.678927	1.22635e-07
ENSG00000052841.10	TTC17	0.215904	1.23736e-07
ENSG00000130684.9	ZNF337	0.468772	1.24496e-07
ENSG00000143815.10	LBR	-0.25105	1.24496e-07
ENSG00000104765.10	BNIP3L	0.304691	1.25988e-07
ENSG00000261659.2	LA16c-313D11.12	0.544926	1.27134e-07
ENSG00000174100.5	MRPL45	-0.257361	1.30574e-07
ENSG00000187266.9	EPOR	-0.409826	1.30911e-07
ENSG00000259712.1	CTD-2184D3.5	0.392456	1.32362e-07
ENSG00000165916.4	PSMC3	-0.300855	1.32871e-07
ENSG00000091527.11	CDV3	-0.204439	1.32871e-07
ENSG00000139624.8	CERS5	0.239378	1.35172e-07
ENSG00000183878.11	UTY	0.255803	1.38001e-07
ENSG00000121039.5	RDH10	-0.324201	1.3806e-07
ENSG00000126787.8	DLGAP5	-0.286154	1.39019e-07
ENSG00000183763.4	TRAIP	-0.360193	1.39019e-07
ENSG00000165409.11	TSHR	0.613735	1.42726e-07
ENSG00000175198.10	PCCA	0.290584	1.46865e-07
ENSG00000166743.5	ACSM1	0.429272	1.48179e-07
ENSG00000165501.12	LRR1	-0.282641	1.48317e-07
ENSG00000181588.15	MEX3D	-0.334722	1.49448e-07
ENSG00000181218.4	HIST3H2A	-0.445332	1.50589e-07
ENSG00000050405.9	LIMA1	0.252694	1.51709e-07
ENSG00000128165.7	ADM2	-1.57845	1.53603e-07
ENSG00000011523.9	CEP68	0.252904	1.5483e-07
ENSG00000205476.4	CCDC85C	-0.425849	1.56009e-07
ENSG00000198924.3	DCLRE1A	-0.35765	1.56524e-07
ENSG00000130775.11	THEMIS2	0.351558	1.56676e-07
ENSG00000184575.7	XPOT	-0.233471	1.58385e-07
ENSG00000134508.8	CABLES1	-0.273464	1.5841e-07
ENSG00000226221.1	AC022431.1	-1.01453	1.5967e-07
ENSG00000084463.3	WBP11	-0.235005	1.5987e-07
ENSG00000086200.12	IPO11	-0.281012	1.63045e-07
ENSG00000182950.2	ODF3L1	0.636543	1.64908e-07
ENSG00000011295.11	TTC19	0.242744	1.67699e-07
ENSG00000147874.6	HAUS6	-0.279223	1.6934e-07
ENSG00000143621.12	ILF2	-0.228611	1.6934e-07
ENSG00000267106.1	C19orf82	0.394762	1.70609e-07
ENSG00000172456.12	FGGY	0.40033	1.70651e-07
ENSG00000147459.13	DOCK5	0.19734	1.71189e-07
ENSG00000135924.11	DNAJB2	0.476429	1.72476e-07
ENSG00000128564.5	VGF	-1.04686	1.73947e-07
ENSG00000119866.16	BCL11A	-0.225992	1.73952e-07
ENSG00000132313.10	MRPL35	-0.276196	1.74864e-07
ENSG00000158169.7	FANCC	-0.296893	1.83034e-07
ENSG00000079387.9	SENP1	-0.250533	1.88663e-07
ENSG00000168300.9	PCMTD1	0.312971	1.98866e-07
ENSG00000214706.6	IFRD2	-0.282941	2.01107e-07
ENSG00000122966.9	CIT	-0.230124	2.02519e-07
ENSG00000143633.8	C1orf131	-0.319239	2.02963e-07
ENSG00000213160.5	KLHL23	-0.794618	2.03109e-07
ENSG00000124207.12	CSE1L	-0.264664	2.05852e-07
ENSG00000150961.10	SEC24D	-0.2287	2.08893e-07
ENSG00000171174.9	RBKS	0.396556	2.11457e-07
ENSG00000165359.10	DDX26B	0.243944	2.11564e-07
ENSG00000272168.1	CASC15	1.14845	2.14149e-07
ENSG00000128487.12	SPECC1	0.206123	2.17371e-07
ENSG00000137312.10	FLOT1	-0.362028	2.19344e-07
ENSG00000092445.7	TYRO3	-0.486636	2.1973e-07
ENSG00000126091.15	ST3GAL3	0.223578	2.2043e-07
ENSG00000120833.9	SOCS2	-0.261805	2.24018e-07
ENSG00000150995.13	ITPR1	0.207921	2.25648e-07
ENSG00000123975.4	CKS2	-0.273433	2.27943e-07
ENSG00000136628.13	EPRS	-0.219122	2.29638e-07
ENSG00000167566.12	NCKAP5L	0.329534	2.31418e-07
ENSG00000197943.5	PLCG2	0.222824	2.327e-07
ENSG00000062822.8	POLD1	-0.279492	2.33483e-07
ENSG00000103222.14	ABCC1	0.246221	2.37618e-07
ENSG00000146109.3	ABT1	-0.278084	2.37756e-07
ENSG00000091542.8	ALKBH5	-0.219854	2.43402e-07
ENSG00000090520.6	DNAJB11	-0.22394	2.45373e-07
ENSG00000138780.10	GSTCD	-0.306569	2.47116e-07
ENSG00000139668.7	WDFY2	0.226452	2.47465e-07
ENSG00000171509.11	RXFP1	0.393565	2.49161e-07
ENSG00000042286.10	AIFM2	-0.509029	2.49528e-07
ENSG00000259188.1	CTD-2647E9.3	0.614845	2.5321e-07
ENSG00000187676.7	B3GALTL	-0.518386	2.5321e-07
ENSG00000230590.3	FTX	0.35888	2.56444e-07
ENSG00000073008.10	PVR	-0.293034	2.60533e-07
ENSG00000114054.9	PCCB	0.252744	2.63157e-07
ENSG00000265764.1	AL662890.3	-0.756586	2.68833e-07
ENSG00000148308.13	GTF3C5	-0.297826	2.72469e-07
ENSG00000221962.3	TMEM14E	0.41512	2.72841e-07
ENSG00000253878.1	RP11-347C18.3	0.742886	2.72907e-07
ENSG00000182774.6	RPS17L	-1.01942	2.72907e-07
ENSG00000179222.13	MAGED1	-0.605405	2.74448e-07
ENSG00000065243.14	PKN2	0.287371	2.79757e-07
ENSG00000182319.5	SGK223	0.265032	2.82299e-07
ENSG00000104980.3	TIMM44	-0.266064	2.8528e-07
ENSG00000169252.4	ADRB2	0.333691	2.87049e-07
ENSG00000225511.2	LINC00475	1.33694	2.96398e-07
ENSG00000144677.10	CTDSPL	-0.620093	3.03356e-07
ENSG00000134107.4	BHLHE40	0.349158	3.05671e-07
ENSG00000143387.8	CTSK	0.57331	3.08065e-07
ENSG00000196081.5	ZNF724P	-0.265832	3.09406e-07
ENSG00000126749.10	EMG1	-0.274005	3.11565e-07
ENSG00000123473.11	STIL	-0.250517	3.12824e-07
ENSG00000178096.8	BOLA1	-0.464333	3.16902e-07
ENSG00000099783.7	HNRNPM	-0.203891	3.16902e-07
ENSG00000140678.12	ITGAX	0.578226	3.24055e-07
ENSG00000184635.9	ZNF93	-0.311983	3.31075e-07
ENSG00000176170.9	SPHK1	-0.420788	3.55111e-07
ENSG00000173706.8	HEG1	-0.365154	3.64039e-07
ENSG00000071655.13	MBD3	-0.252636	3.65905e-07
ENSG00000185347.13	C14orf80	-0.377242	3.72295e-07
ENSG00000241343.5	RPL36A	-0.324545	3.7376e-07
ENSG00000209482.1	SNORD83A	-0.943698	3.80029e-07
ENSG00000130204.8	TOMM40	-0.259031	3.85464e-07
ENSG00000272198.1	RP11-309G3.3	0.768631	3.9108e-07
ENSG00000099338.18	CATSPERG	0.604847	3.92259e-07
ENSG00000187522.9	HSPA14	-0.220539	3.97963e-07
ENSG00000213963.2	AC074286.1	0.422799	4.088e-07
ENSG00000178409.9	BEND3	-0.398244	4.10341e-07
ENSG00000070718.7	AP3M2	-0.267923	4.10341e-07
ENSG00000151876.8	FBXO4	-0.307353	4.10468e-07
ENSG00000143515.12	ATP8B2	-1.03454	4.11207e-07
ENSG00000147140.11	NONO	-0.218468	4.11207e-07
ENSG00000105048.12	TNNT1	-0.724964	4.14241e-07
ENSG00000235408.2	SNORA71B	-0.689521	4.40698e-07
ENSG00000123338.8	NCKAP1L	0.19782	4.53046e-07
ENSG00000123505.10	AMD1	-0.253668	4.53046e-07
ENSG00000250479.4	CHCHD10	-0.354349	4.55537e-07
ENSG00000198912.6	C1orf174	-0.237392	4.56448e-07
ENSG00000188613.5	NANOS1	-0.279621	4.58551e-07
ENSG00000163528.8	CHCHD4	-0.318859	4.58551e-07
ENSG00000166428.8	PLD4	0.294462	4.66725e-07
ENSG00000130826.11	DKC1	-0.209581	4.71352e-07
ENSG00000137411.12	VARS2	-0.27353	4.74995e-07
ENSG00000271455.1	RP11-269M20.2	0.574443	4.76545e-07
ENSG00000132383.7	RPA1	-0.208074	4.79074e-07
ENSG00000184205.10	TSPYL2	-0.511843	4.79598e-07
ENSG00000158869.6	FCER1G	0.404939	4.81693e-07
ENSG00000137574.6	TGS1	-0.212724	4.82735e-07
ENSG00000188486.3	H2AFX	-0.323828	4.83968e-07
ENSG00000139438.5	FAM222A	-0.497149	4.83982e-07
ENSG00000080298.11	RFX3	0.414178	4.92098e-07
ENSG00000177192.9	PUS1	-0.272751	4.97358e-07
ENSG00000143321.14	HDGF	-0.218033	5.02611e-07
ENSG00000116221.11	MRPL37	-0.256106	5.03116e-07
ENSG00000104442.5	ARMC1	-0.257166	5.04681e-07
ENSG00000125869.5	LAMP5	0.211452	5.04681e-07
ENSG00000147251.11	DOCK11	0.234182	5.06442e-07
ENSG00000200354.1	SNORA71D	-0.748714	5.14902e-07
ENSG00000172534.9	HCFC1	-0.264995	5.25126e-07
ENSG00000105290.7	APLP1	-0.538621	5.27539e-07
ENSG00000178685.9	PARP10	0.291001	5.3058e-07
ENSG00000127481.10	UBR4	0.208671	5.34991e-07
ENSG00000049759.12	NEDD4L	-1.91863	5.44367e-07
ENSG00000012817.11	KDM5D	0.22026	5.46647e-07
ENSG00000165233.13	C9orf89	0.289998	5.4914e-07
ENSG00000073536.13	NLE1	-0.270828	5.55114e-07
ENSG00000178425.9	NT5DC1	-0.431108	5.69838e-07
ENSG00000100220.7	RTCB	-0.225939	5.74477e-07
ENSG00000097021.15	ACOT7	-0.301539	5.75289e-07
ENSG00000143727.11	ACP1	-0.234484	5.78314e-07
ENSG00000125484.7	GTF3C4	-0.225435	6.0815e-07
ENSG00000095380.10	NANS	-0.250041	6.1046e-07
ENSG00000188878.12	FBF1	-0.410518	6.12833e-07
ENSG00000254260.1	RP11-369E15.1	0.885911	6.12833e-07
ENSG00000099250.13	NRP1	0.360136	6.32274e-07
ENSG00000133265.6	HSPBP1	-0.291034	6.40355e-07
ENSG00000178718.5	RPP25	-0.336898	6.5442e-07
ENSG00000250565.2	ATP6V1E2	-0.569629	6.56555e-07
ENSG00000187210.8	GCNT1	0.230884	6.67607e-07
ENSG00000133597.5	ADCK2	-0.406739	6.68949e-07
ENSG00000090470.10	PDCD7	-0.286616	6.69313e-07
ENSG00000196152.6	ZNF79	0.344034	6.79305e-07
ENSG00000102007.6	PLP2	-0.28925	6.87549e-07
ENSG00000160305.13	DIP2A	0.244416	6.88604e-07
ENSG00000072571.15	HMMR	-0.320208	6.97321e-07
ENSG00000112130.12	RNF8	-0.261345	7.16451e-07
ENSG00000072210.14	ALDH3A2	0.259568	7.18736e-07
ENSG00000154511.7	FAM69A	-0.743605	7.20829e-07
ENSG00000183048.7	SLC25A10	-0.368806	7.27072e-07
ENSG00000103472.5	RRN3P2	0.351553	7.31549e-07
ENSG00000005379.11	BZRAP1	0.276569	7.32426e-07
ENSG00000213976.3	CTD-2561J22.2	0.44873	7.36932e-07
ENSG00000115526.6	CHST10	-0.256769	7.42322e-07
ENSG00000129351.13	ILF3	-0.205806	7.60197e-07
ENSG00000055070.12	SZRD1	-0.232572	7.67455e-07
ENSG00000105519.8	CAPS	0.410503	7.71722e-07
ENSG00000179750.11	APOBEC3B	-0.329805	7.87039e-07
ENSG00000011304.12	PTBP1	-0.230878	7.90405e-07
ENSG00000054965.6	FAM168A	0.225012	7.90405e-07
ENSG00000173889.11	PHC3	0.218007	7.92901e-07
ENSG00000206149.6	HERC2P9	0.290887	8.22185e-07
ENSG00000166046.6	TCP11L2	0.577013	8.22293e-07
ENSG00000168078.5	PBK	-0.277852	8.25971e-07
ENSG00000134285.6	FKBP11	0.321978	8.25971e-07
ENSG00000106804.6	C5	0.254313	8.26051e-07
ENSG00000138688.11	KIAA1109	0.24616	8.27556e-07
ENSG00000242299.1	RP11-234A1.1	-0.521424	8.57012e-07
ENSG00000152818.14	UTRN	0.210952	8.65319e-07
ENSG00000156261.8	CCT8	-0.221944	8.69643e-07
ENSG00000040199.14	PHLPP2	-0.415548	8.97298e-07
ENSG00000138346.10	DNA2	-0.265763	8.99059e-07
ENSG00000163399.11	ATP1A1	-0.21621	9.06555e-07
ENSG00000213956.4	RP11-269M20.1	0.451506	9.0976e-07
ENSG00000170089.11	RP11-423H2.1	-0.369137	9.0976e-07
ENSG00000169607.8	CKAP2L	-0.327086	9.33107e-07
ENSG00000136450.8	SRSF1	-0.188246	9.45845e-07
ENSG00000188157.9	AGRN	0.246203	9.488e-07
ENSG00000100285.9	NEFH	-0.320576	9.55589e-07
ENSG00000128228.4	SDF2L1	-0.29778	9.58311e-07
ENSG00000033030.9	ZCCHC8	-0.264599	9.67688e-07
ENSG00000270145.1	CTD-2267D19.6	-0.623916	1.00249e-06
ENSG00000114473.9	IQCG	0.342175	1.02251e-06
ENSG00000116830.7	TTF2	-0.194629	1.02654e-06
ENSG00000003756.12	RBM5	0.181197	1.02757e-06
ENSG00000165806.15	CASP7	-0.535704	1.04355e-06
ENSG00000100350.10	FOXRED2	-0.250087	1.04355e-06
ENSG00000237190.3	CDKN2AIPNL	-0.279054	1.05357e-06
ENSG00000012963.9	UBR7	-0.213319	1.06775e-06
ENSG00000112029.5	FBXO5	-0.232235	1.06977e-06
ENSG00000111670.10	GNPTAB	0.251241	1.12685e-06
ENSG00000110619.12	CARS	-0.271134	1.13895e-06
ENSG00000126003.6	PLAGL2	-0.202418	1.1426e-06
ENSG00000069943.5	PIGB	0.286086	1.15783e-06
ENSG00000106355.5	LSM5	-0.239222	1.19377e-06
ENSG00000165195.9	PIGA	-0.352949	1.2117e-06
ENSG00000170035.11	UBE2E3	-0.257948	1.21989e-06
ENSG00000127914.12	AKAP9	0.314276	1.23527e-06
ENSG00000171320.10	ESCO2	-0.32594	1.28503e-06
ENSG00000163348.3	PYGO2	-0.230119	1.33114e-06
ENSG00000130935.5	NOL11	-0.247951	1.33268e-06
ENSG00000067167.3	TRAM1	-0.266344	1.33268e-06
ENSG00000164091.7	WDR82	-0.193833	1.34213e-06
ENSG00000035681.3	NSMAF	0.18299	1.34905e-06
ENSG00000183431.7	SF3A3	-0.224029	1.34905e-06
ENSG00000228672.2	PROB1	-0.422347	1.37003e-06
ENSG00000167315.13	ACAA2	-0.260452	1.39181e-06
ENSG00000173542.4	MOB1B	0.377747	1.39677e-06
ENSG00000065615.9	CYB5R4	0.27849	1.40489e-06
ENSG00000119777.14	TMEM214	-0.266282	1.42684e-06
ENSG00000138119.12	MYOF	0.408476	1.45119e-06
ENSG00000166402.4	TUB	-0.559037	1.4592e-06
ENSG00000126882.8	FAM78A	-0.231934	1.46438e-06
ENSG00000244462.3	RBM12	-0.205578	1.50004e-06
ENSG00000122861.11	PLAU	0.244522	1.53836e-06
ENSG00000075856.7	SART3	-0.233617	1.56171e-06
ENSG00000176659.5	C20orf197	0.288657	1.5788e-06
ENSG00000226360.4	RPL10AP6	-0.77951	1.60003e-06
ENSG00000197785.9	ATAD3A	-0.260042	1.60839e-06
ENSG00000141873.6	SLC39A3	-0.269143	1.65631e-06
ENSG00000147649.5	MTDH	-0.215341	1.65631e-06
ENSG00000163625.11	WDFY3	0.218719	1.67396e-06
ENSG00000182180.9	MRPS16	-0.219828	1.68028e-06
ENSG00000269821.1	KCNQ1OT1	0.299604	1.68984e-06
ENSG00000212293.1	SNORA16	0.669228	1.7038e-06
ENSG00000135549.10	PKIB	0.349898	1.74962e-06
ENSG00000134278.10	SPIRE1	-0.400284	1.81621e-06
ENSG00000174744.9	BRMS1	-0.280971	1.83163e-06
ENSG00000163507.9	KIAA1524	-0.283337	1.83166e-06
ENSG00000120053.9	GOT1	-0.433433	1.83454e-06
ENSG00000196821.5	C6orf106	-0.218034	1.84166e-06
ENSG00000128590.4	DNAJB9	-0.398074	1.85926e-06
ENSG00000151929.5	BAG3	-0.333554	1.87738e-06
ENSG00000070495.10	JMJD6	-0.290432	1.89087e-06
ENSG00000172840.2	PDP2	-0.262774	1.89137e-06
ENSG00000243302.3	RP11-274B21.2	0.307153	1.92347e-06
ENSG00000141499.12	WRAP53	-0.321565	1.93045e-06
ENSG00000248019.2	FAM13A-AS1	0.483116	1.95227e-06
ENSG00000224751.2	SHMT1P1	0.387673	1.95349e-06
ENSG00000163902.7	RPN1	-0.216701	1.97618e-06
ENSG00000177200.11	CHD9	0.272338	2.00087e-06
ENSG00000064419.9	TNPO3	-0.203704	2.00517e-06
ENSG00000090273.9	NUDC	-0.24027	2.05681e-06
ENSG00000148158.12	SNX30	0.209316	2.07206e-06
ENSG00000108379.5	WNT3	-0.928815	2.07771e-06
ENSG00000105438.4	KDELR1	-0.220936	2.09266e-06
ENSG00000112245.6	PTP4A1	0.268802	2.09275e-06
ENSG00000232634.1	NEFLP1	0.8351	2.11236e-06
ENSG00000062716.6	VMP1	0.249526	2.1345e-06
ENSG00000130159.9	ECSIT	-0.245577	2.16024e-06
ENSG00000213390.6	ARHGAP19	-0.219166	2.16595e-06
ENSG00000008256.11	CYTH3	0.26389	2.21678e-06
ENSG00000179978.10	RP11-1319K7.1	0.529637	2.23409e-06
ENSG00000111142.9	METAP2	-0.230724	2.2358e-06
ENSG00000147162.9	OGT	0.168784	2.24705e-06
ENSG00000128578.5	STRIP2	-0.316091	2.25298e-06
ENSG00000172869.10	DMXL1	0.282784	2.26319e-06
ENSG00000100335.8	MIEF1	-0.190552	2.27725e-06
ENSG00000143368.9	SF3B4	-0.240561	2.27889e-06
ENSG00000110958.11	PTGES3	-0.220736	2.28403e-06
ENSG00000141140.12	MYO19	-0.2365	2.2945e-06
ENSG00000167721.6	TSR1	-0.19095	2.29724e-06
ENSG00000157873.13	TNFRSF14	0.314862	2.30206e-06
ENSG00000122566.16	HNRNPA2B1	-0.191467	2.32615e-06
ENSG00000106404.9	CLDN15	0.273113	2.34114e-06
ENSG00000178966.11	RMI1	-0.253649	2.34868e-06
ENSG00000101544.4	ADNP2	-0.194064	2.34981e-06
ENSG00000207523.1	SNORA66	-1.04002	2.41215e-06
ENSG00000128708.8	HAT1	-0.273116	2.45979e-06
ENSG00000231007.4	CDC20P1	-0.671502	2.45979e-06
ENSG00000166750.5	SLFN5	0.541344	2.45979e-06
ENSG00000104825.12	NFKBIB	-0.314864	2.51399e-06
ENSG00000115275.7	MOGS	-0.250302	2.53317e-06
ENSG00000133805.11	AMPD3	0.366483	2.53547e-06
ENSG00000170291.10	ELP5	-0.273192	2.5464e-06
ENSG00000181827.10	RFX7	0.199231	2.5574e-06
ENSG00000228492.2	RAB11FIP1P1	0.676852	2.56741e-06
ENSG00000103051.14	COG4	0.211229	2.56741e-06
ENSG00000104147.4	OIP5	-0.374937	2.56741e-06
ENSG00000263069.1	CTD-2047H16.4	0.361817	2.56838e-06
ENSG00000145687.11	SSBP2	0.29047	2.65686e-06
ENSG00000100124.8	ANKRD54	-0.263677	2.66776e-06
ENSG00000129514.4	FOXA1	-0.686458	2.66982e-06
ENSG00000182197.6	EXT1	-0.616801	2.68721e-06
ENSG00000102763.11	VWA8	0.232465	2.68721e-06
ENSG00000107833.6	NPM3	-0.302778	2.71268e-06
ENSG00000115687.9	PASK	-0.244098	2.71268e-06
ENSG00000124813.16	RUNX2	0.198241	2.73108e-06
ENSG00000235863.2	B3GALT4	0.414096	2.76684e-06
ENSG00000128973.7	CLN6	-0.231275	2.79487e-06
ENSG00000237424.1	FOXD2-AS1	-0.412854	2.79487e-06
ENSG00000001497.12	LAS1L	-0.209723	2.87015e-06
ENSG00000197451.6	HNRNPAB	-0.196708	2.95321e-06
ENSG00000106459.10	NRF1	-0.245246	2.95321e-06
ENSG00000119547.5	ONECUT2	0.214222	2.96948e-06
ENSG00000207445.1	SNORD15B	-1.0203	2.98143e-06
ENSG00000107960.6	OBFC1	0.283152	3.02706e-06
ENSG00000197380.6	DACT3	0.609374	3.02782e-06
ENSG00000164463.8	CREBRF	0.339083	3.08046e-06
ENSG00000143674.6	MLK4	-0.440839	3.08169e-06
ENSG00000124535.11	WRNIP1	-0.207655	3.12368e-06
ENSG00000101138.7	CSTF1	-0.235019	3.13179e-06
ENSG00000061987.10	MON2	0.243501	3.13431e-06
ENSG00000129116.13	PALLD	0.643694	3.29234e-06
ENSG00000121774.13	KHDRBS1	-0.187231	3.30608e-06
ENSG00000183814.11	LIN9	-0.344339	3.31174e-06
ENSG00000138764.9	CCNG2	0.327217	3.33496e-06
ENSG00000232730.1	FAM8A4P	1.60969	3.36529e-06
ENSG00000169504.10	CLIC4	-0.260144	3.37334e-06
ENSG00000176014.8	TUBB6	-0.258696	3.37662e-06
ENSG00000188641.8	DPYD	0.224962	3.44584e-06
ENSG00000236154.1	RP11-343J3.2	0.422042	3.4688e-06
ENSG00000204859.7	ZBTB48	0.247162	3.4688e-06
ENSG00000096384.15	HSP90AB1	-0.208647	3.48182e-06
ENSG00000267254.1	CTD-2162K18.5	0.454937	3.50511e-06
ENSG00000106772.13	PRUNE2	0.559283	3.50789e-06
ENSG00000100418.7	DESI1	-0.236315	3.5349e-06
ENSG00000123360.7	PDE1B	0.354243	3.56846e-06
ENSG00000143126.7	CELSR2	-0.4314	3.5822e-06
ENSG00000237075.4	RP11-497H16.2	0.633385	3.58669e-06
ENSG00000162923.10	WDR26	0.197089	3.60034e-06
ENSG00000116133.7	DHCR24	-0.236837	3.6121e-06
ENSG00000213918.6	DNASE1	0.25826	3.65189e-06
ENSG00000081148.11	IMPG2	0.753729	3.69553e-06
ENSG00000175216.10	CKAP5	-0.174136	3.75172e-06
ENSG00000115159.11	GPD2	-0.24304	3.78038e-06
ENSG00000120896.9	SORBS3	-0.248012	3.7889e-06
ENSG00000173064.6	HECTD4	0.199216	3.80581e-06
ENSG00000128731.11	HERC2	0.191069	3.8404e-06
ENSG00000133101.5	CCNA1	-0.265697	3.89632e-06
ENSG00000125834.8	STK35	-0.249536	3.91745e-06
ENSG00000226794.1	MTND1P20	0.891232	3.9368e-06
ENSG00000160193.7	WDR4	-0.239433	3.95509e-06
ENSG00000100767.11	PAPLN	0.316633	3.95697e-06
ENSG00000103657.9	HERC1	0.200101	3.95906e-06
ENSG00000224578.3	HNRNPA1P48	-0.373105	3.96574e-06
ENSG00000108312.10	UBTF	-0.206507	4.00298e-06
ENSG00000180817.7	PPA1	-0.238265	4.03091e-06
ENSG00000197258.5	EIF4BP6	-0.452793	4.04812e-06
ENSG00000074370.13	ATP2A3	-0.239605	4.06201e-06
ENSG00000223496.1	EXOSC6	-0.237139	4.12606e-06
ENSG00000167703.10	SLC43A2	0.397897	4.16283e-06
ENSG00000141698.12	NT5C3B	-0.443206	4.16544e-06
ENSG00000165118.10	C9orf64	-0.3206	4.17706e-06
ENSG00000109089.7	CDR2L	-0.408919	4.19618e-06
ENSG00000091483.6	FH	-0.239079	4.20688e-06
ENSG00000141030.8	COPS3	-0.212489	4.2093e-06
ENSG00000168159.9	RNF187	-0.25834	4.24849e-06
ENSG00000246130.1	RP11-875O11.2	0.806195	4.25599e-06
ENSG00000138180.11	CEP55	-0.250544	4.34462e-06
ENSG00000177917.6	ARL6IP6	-0.27926	4.37939e-06
ENSG00000160949.12	TONSL	-0.232058	4.42352e-06
ENSG00000076382.12	SPAG5	-0.206207	4.45778e-06
ENSG00000145217.9	SLC26A1	0.327791	4.50401e-06
ENSG00000138668.14	HNRNPD	-0.196044	4.52526e-06
ENSG00000154898.11	CCDC144CP	0.456886	4.53082e-06
ENSG00000177675.4	CD163L1	0.348191	4.74688e-06
ENSG00000130522.4	JUND	-0.25669	4.77533e-06
ENSG00000111144.5	LTA4H	-0.252463	4.81809e-06
ENSG00000182628.8	SKA2	-0.258137	4.81809e-06
ENSG00000150753.7	CCT5	-0.209941	4.83036e-06
ENSG00000272405.1	RP11-284F21.10	0.45629	4.85878e-06
ENSG00000104998.2	IL27RA	-0.490362	4.87874e-06
ENSG00000151176.3	PLBD2	0.257585	4.88401e-06
ENSG00000115241.9	PPM1G	-0.241726	4.89426e-06
ENSG00000168556.5	ING2	-0.364204	4.90237e-06
ENSG00000064393.11	HIPK2	0.315228	5.01431e-06
ENSG00000177409.7	SAMD9L	0.494704	5.05646e-06
ENSG00000144043.7	TEX261	-0.227543	5.08591e-06
ENSG00000132591.7	ERAL1	-0.237957	5.12077e-06
ENSG00000197153.3	HIST1H3J	-0.299815	5.21844e-06
ENSG00000177084.12	POLE	-0.221137	5.2229e-06
ENSG00000047597.5	XK	-0.573545	5.376e-06
ENSG00000112343.8	TRIM38	0.236318	5.43387e-06
ENSG00000163006.7	CCDC138	-0.313738	5.45963e-06
ENSG00000205213.9	LGR4	-0.250763	5.48752e-06
ENSG00000138297.9	TIMM23	-0.237878	5.50126e-06
ENSG00000138468.11	SENP7	0.300797	5.54494e-06
ENSG00000157224.11	CLDN12	-0.369553	5.57123e-06
ENSG00000134308.9	YWHAQ	-0.196709	5.57123e-06
ENSG00000007080.6	CCDC124	-0.272375	5.76121e-06
ENSG00000119403.9	PHF19	-0.229733	5.80176e-06
ENSG00000138834.8	MAPK8IP3	0.210715	5.83424e-06
ENSG00000120334.11	CENPL	-0.259044	5.8475e-06
ENSG00000107036.7	KIAA1432	0.234933	5.87425e-06
ENSG00000176531.6	PHLDB3	0.324186	5.88235e-06
ENSG00000109805.5	NCAPG	-0.242957	5.8895e-06
ENSG00000160602.9	NEK8	-0.681274	5.8895e-06
ENSG00000115194.6	SLC30A3	-0.91362	5.89354e-06
ENSG00000138376.6	BARD1	-0.239013	5.92324e-06
ENSG00000104356.6	POP1	-0.19251	5.93034e-06
ENSG00000024526.12	DEPDC1	-0.320827	5.94113e-06
ENSG00000107719.8	PALD1	0.262763	6.10056e-06
ENSG00000224546.2	EIF4BP3	-0.369519	6.10056e-06
ENSG00000135845.5	PIGC	-0.259264	6.19017e-06
ENSG00000111788.9	RP11-22B23.1	-0.307579	6.20306e-06
ENSG00000065413.12	ANKRD44	0.223369	6.56127e-06
ENSG00000182957.11	SPATA13	-0.289478	6.64655e-06
ENSG00000104093.9	DMXL2	0.231122	6.64655e-06
ENSG00000180964.12	TCEAL8	-0.313642	6.69485e-06
ENSG00000171135.10	JAGN1	-0.245124	6.77332e-06
ENSG00000132341.7	RAN	-0.211524	6.8178e-06
ENSG00000185278.10	ZBTB37	0.246625	6.87142e-06
ENSG00000203875.6	SNHG5	-0.233327	6.9059e-06
ENSG00000082516.8	GEMIN5	-0.203132	6.9059e-06
ENSG00000137656.7	BUD13	-0.238376	6.94662e-06
ENSG00000054148.13	PHPT1	0.285467	7.02812e-06
ENSG00000225988.1	RP5-1119D9.4	0.228557	7.15485e-06
ENSG00000114573.5	ATP6V1A	0.212911	7.20474e-06
ENSG00000163479.9	SSR2	-0.211436	7.24707e-06
ENSG00000178852.11	EFCAB13	0.408028	7.39154e-06
ENSG00000198860.7	TSEN15	-0.258419	7.43372e-06
ENSG00000128739.16	SNRPN	0.458769	7.43789e-06
ENSG00000183762.8	KREMEN1	-0.367754	7.49036e-06
ENSG00000146731.6	CCT6A	-0.199549	7.49244e-06
ENSG00000071967.7	CYBRD1	-0.231137	7.50377e-06
ENSG00000117862.7	TXNDC12	-0.223679	7.54186e-06
ENSG00000156966.6	B3GNT7	0.243692	7.57882e-06
ENSG00000110104.7	CCDC86	-0.26823	7.57882e-06
ENSG00000111674.4	ENO2	-0.68882	7.62541e-06
ENSG00000068079.3	IFI35	0.380443	7.62541e-06
ENSG00000179051.9	RCC2	-0.192175	7.64063e-06
ENSG00000186532.7	SMYD4	-0.233036	7.74374e-06
ENSG00000144426.14	NBEAL1	0.31959	7.75427e-06
ENSG00000142453.7	CARM1	-0.255793	7.83937e-06
ENSG00000238005.2	RP11-443B7.1	0.611588	7.89421e-06
ENSG00000121957.8	GPSM2	-0.24372	8.24066e-06
ENSG00000149548.10	CCDC15	-0.287791	8.27312e-06
ENSG00000006831.9	ADIPOR2	-0.194522	8.29894e-06
ENSG00000115919.10	KYNU	0.260825	8.30195e-06
ENSG00000105447.8	GRWD1	-0.223116	8.31471e-06
ENSG00000170855.3	TRIAP1	0.247164	8.35049e-06
ENSG00000082153.13	BZW1	-0.216959	8.4055e-06
ENSG00000255092.1	RP11-58K22.4	0.814005	8.45796e-06
ENSG00000183527.7	PSMG1	-0.286604	8.46491e-06
ENSG00000086598.6	TMED2	-0.212853	8.47019e-06
ENSG00000100216.4	TOMM22	-0.222721	8.5793e-06
ENSG00000110756.13	HPS5	0.228396	8.66296e-06
ENSG00000174227.11	PIGG	0.195318	8.73474e-06
ENSG00000081377.12	CDC14B	-0.893648	8.73474e-06
ENSG00000204619.3	PPP1R11	-0.237866	8.76586e-06
ENSG00000120837.3	NFYB	-0.283669	8.76888e-06
ENSG00000103495.9	MAZ	-0.257912	8.84616e-06
ENSG00000249115.4	HAUS5	-0.256824	8.87332e-06
ENSG00000110107.4	PRPF19	-0.233415	8.93979e-06
ENSG00000104888.5	SLC17A7	-0.9665	8.93979e-06
ENSG00000140400.10	MAN2C1	0.222142	8.93979e-06
ENSG00000086289.7	EPDR1	-0.282318	8.94216e-06
ENSG00000138160.4	KIF11	-0.26347	8.94216e-06
ENSG00000112208.10	BAG2	-0.265379	8.94216e-06
ENSG00000183751.10	TBL3	-0.260014	9.04663e-06
ENSG00000204438.6	GPANK1	-0.294182	9.05437e-06
ENSG00000105383.10	CD33	0.198615	9.24456e-06
ENSG00000170835.10	CEL	0.895556	9.25146e-06
ENSG00000085224.16	ATRX	0.295677	9.26405e-06
ENSG00000244363.2	RPL7P23p	-1.16217	9.2918e-06
ENSG00000143178.8	TBX19	0.563774	9.35097e-06
ENSG00000119801.8	YPEL5	0.277921	9.45526e-06
ENSG00000143228.8	NUF2	-0.310691	9.53345e-06
ENSG00000163453.7	IGFBP7	0.265817	9.53345e-06
ENSG00000261226.1	RP11-830F9.7	0.353964	9.53922e-06
ENSG00000106399.7	RPA3	-0.286096	9.62472e-06
ENSG00000012822.11	CALCOCO1	0.269463	9.63592e-06
ENSG00000167380.12	ZNF226	0.238842	9.74012e-06
ENSG00000244398.1	RP11-466H18.1	-0.333593	9.74685e-06
ENSG00000152377.8	SPOCK1	0.340644	1.00017e-05
ENSG00000019582.10	CD74	0.271251	1.0019e-05
ENSG00000148730.6	EIF4EBP2	-0.165509	1.00704e-05
ENSG00000167528.8	ZNF641	0.25748	1.00758e-05
ENSG00000092964.12	DPYSL2	0.192839	1.00883e-05
ENSG00000066583.7	ISOC1	-0.332683	1.0113e-05
ENSG00000106261.12	ZKSCAN1	0.184932	1.04193e-05
ENSG00000198270.8	TMEM116	0.272754	1.04235e-05
ENSG00000230330.1	HMGN2P3	-0.395402	1.08184e-05
ENSG00000198558.2	HIST1H4L	-0.316729	1.08339e-05
ENSG00000004700.11	RECQL	-0.251422	1.08454e-05
ENSG00000161642.13	ZNF385A	0.26654	1.12001e-05
ENSG00000105204.9	DYRK1B	0.312951	1.12258e-05
ENSG00000182611.3	HIST1H2AJ	-0.300548	1.13209e-05
ENSG00000126254.7	RBM42	-0.22689	1.15468e-05
ENSG00000005187.7	ACSM3	0.296099	1.15631e-05
ENSG00000154654.10	NCAM2	0.308839	1.16199e-05
ENSG00000104524.9	PYCRL	-0.279341	1.16234e-05
ENSG00000186818.8	LILRB4	0.230295	1.16305e-05
ENSG00000134779.10	TPGS2	-0.19342	1.17049e-05
ENSG00000212664.4	RP11-592N21.1	-1.04857	1.18833e-05
ENSG00000115758.8	ODC1	-0.20497	1.19087e-05
ENSG00000248971.2	KRT8P46	0.483375	1.20034e-05
ENSG00000188987.2	HIST1H4D	-0.307113	1.21042e-05
ENSG00000074842.3	C19orf10	-0.245842	1.21291e-05
ENSG00000119772.12	DNMT3A	-0.260149	1.21291e-05
ENSG00000006534.11	ALDH3B1	0.257382	1.21717e-05
ENSG00000143344.11	RGL1	0.483611	1.22977e-05
ENSG00000155657.19	TTN	0.287256	1.23977e-05
ENSG00000169660.11	HEXDC	0.255362	1.2515e-05
ENSG00000152620.8	NADK2	-0.224635	1.25935e-05
ENSG00000128581.11	RABL5	-0.492972	1.26812e-05
ENSG00000116273.5	PHF13	-0.32958	1.26841e-05
ENSG00000100479.8	POLE2	-0.246646	1.27011e-05
ENSG00000235284.1	SNORD62A	-1.53583	1.29175e-05
ENSG00000100504.12	PYGL	-0.193491	1.29252e-05
ENSG00000112742.5	TTK	-0.273216	1.29653e-05
ENSG00000147894.10	C9orf72	0.278268	1.2973e-05
ENSG00000178695.4	KCTD12	-0.42548	1.30542e-05
ENSG00000242588.2	RP11-274B21.1	0.233399	1.33678e-05
ENSG00000177733.4	HNRNPA0	-0.19535	1.33698e-05
ENSG00000186575.13	NF2	-0.189812	1.34243e-05
ENSG00000105321.8	CCDC9	-0.318639	1.34339e-05
ENSG00000137054.11	POLR1E	-0.216582	1.34529e-05
ENSG00000102580.10	DNAJC3	-0.236266	1.34678e-05
ENSG00000197471.7	SPN	-0.1774	1.34728e-05
ENSG00000131747.10	TOP2A	-0.226373	1.35804e-05
ENSG00000180549.7	FUT7	-0.293223	1.3584e-05
ENSG00000143570.13	SLC39A1	-0.254261	1.36283e-05
ENSG00000167005.9	NUDT21	-0.221945	1.38813e-05
ENSG00000177889.5	UBE2N	-0.204768	1.4029e-05
ENSG00000198081.6	ZBTB14	-0.256496	1.42358e-05
ENSG00000136068.10	FLNB	0.217309	1.44122e-05
ENSG00000169508.6	GPR183	0.296424	1.44719e-05
ENSG00000175893.7	ZDHHC21	0.330644	1.45572e-05
ENSG00000241556.1	RP11-490G8.1	-1.9321	1.45701e-05
ENSG00000273033.1	RP11-67L2.2	0.457221	1.46398e-05
ENSG00000182580.2	EPHB3	0.531353	1.47182e-05
ENSG00000085719.7	CPNE3	-0.231589	1.47465e-05
ENSG00000167601.7	AXL	0.474798	1.47465e-05
ENSG00000170144.14	HNRNPA3	-0.209651	1.48077e-05
ENSG00000213983.7	AP1G2	0.264247	1.48356e-05
ENSG00000127191.13	TRAF2	-0.240782	1.49144e-05
ENSG00000198168.4	SVIP	-0.41473	1.49614e-05
ENSG00000069275.12	NUCKS1	-0.207381	1.50781e-05
ENSG00000132507.13	EIF5A	-0.23038	1.53051e-05
ENSG00000136950.9	ARPC5L	-0.238217	1.53051e-05
ENSG00000266753.2	RP11-690G19.3	0.297483	1.54081e-05
ENSG00000180871.3	CXCR2	0.280471	1.54099e-05
ENSG00000170604.3	IRF2BP1	-0.250967	1.54473e-05
ENSG00000179331.2	RAB39A	-0.47512	1.54552e-05
ENSG00000177150.8	FAM210A	-0.231796	1.55966e-05
ENSG00000182704.6	TSKU	-1.181	1.58094e-05
ENSG00000175711.4	B3GNTL1	0.278019	1.58759e-05
ENSG00000124795.10	DEK	-0.294187	1.59489e-05
ENSG00000159164.5	SV2A	-0.778586	1.59629e-05
ENSG00000122644.8	ARL4A	-0.312677	1.59714e-05
ENSG00000130706.8	ADRM1	-0.282002	1.60436e-05
ENSG00000114857.13	NKTR	0.231509	1.60442e-05
ENSG00000168286.1	THAP11	-0.318168	1.62115e-05
ENSG00000183624.9	HMCES	-0.279555	1.6303e-05
ENSG00000106785.10	TRIM14	-0.228893	1.64329e-05
ENSG00000148187.13	MRRF	-0.21045	1.64769e-05
ENSG00000153560.7	UBP1	-0.173998	1.65715e-05
ENSG00000149557.8	FEZ1	-1.713	1.65795e-05
ENSG00000118200.10	CAMSAP2	-0.586058	1.67746e-05
ENSG00000183401.7	CCDC159	0.299373	1.70826e-05
ENSG00000119139.12	TJP2	-0.263624	1.72183e-05
ENSG00000173894.6	CBX2	-0.280875	1.73126e-05
ENSG00000260852.1	FBXL19-AS1	-0.327746	1.7392e-05
ENSG00000134291.7	TMEM106C	-0.231266	1.75322e-05
ENSG00000228956.4	AC144521.1	0.290382	1.76678e-05
ENSG00000184445.7	KNTC1	-0.196849	1.76947e-05
ENSG00000130702.9	LAMA5	0.720449	1.79266e-05
ENSG00000205726.9	ITSN1	-0.238182	1.82452e-05
ENSG00000106976.14	DNM1	0.280467	1.83594e-05
ENSG00000163220.10	S100A9	0.64212	1.83946e-05
ENSG00000100410.3	PHF5A	-0.244139	1.85166e-05
ENSG00000074201.4	CLNS1A	-0.183051	1.87726e-05
ENSG00000106348.12	IMPDH1	-0.249037	1.87794e-05
ENSG00000167613.11	LAIR1	0.18369	1.88525e-05
ENSG00000170860.3	LSM3	-0.279114	1.89762e-05
ENSG00000107779.7	BMPR1A	-0.272763	1.90112e-05
ENSG00000119326.10	CTNNAL1	-0.384766	1.90718e-05
ENSG00000089486.12	CDIP1	0.234867	1.92333e-05
ENSG00000184619.3	KRBA2	0.864478	1.92799e-05
ENSG00000135218.13	CD36	0.267144	1.92853e-05
ENSG00000107611.10	CUBN	0.546034	1.95337e-05
ENSG00000108578.10	BLMH	-0.245444	1.95885e-05
ENSG00000189362.7	TMEM194B	-0.264865	1.95885e-05
ENSG00000102978.8	POLR2C	-0.220473	1.97527e-05
ENSG00000163961.4	RNF168	-0.203522	1.97621e-05
ENSG00000179163.11	FUCA1	0.311176	1.9863e-05
ENSG00000116985.6	BMP8B	-0.292119	2.0086e-05
ENSG00000168883.15	USP39	-0.215504	2.01634e-05
ENSG00000085117.7	CD82	0.264338	2.03822e-05
ENSG00000136122.11	BORA	-0.221781	2.03988e-05
ENSG00000160957.8	RECQL4	-0.215834	2.05967e-05
ENSG00000025770.14	NCAPH2	-0.259115	2.06047e-05
ENSG00000171155.7	C1GALT1C1	-0.272521	2.06769e-05
ENSG00000244405.3	ETV5	-0.248921	2.07567e-05
ENSG00000123219.8	CENPK	-0.256292	2.09397e-05
ENSG00000111912.14	NCOA7	-0.304491	2.09666e-05
ENSG00000114779.15	ABHD14B	-0.202237	2.09864e-05
ENSG00000104472.5	CHRAC1	-0.196158	2.10412e-05
ENSG00000064607.12	SUGP2	0.174363	2.11789e-05
ENSG00000157895.7	C12orf43	-0.290081	2.14438e-05
ENSG00000198185.7	ZNF334	0.306772	2.16049e-05
ENSG00000123453.12	SARDH	0.408192	2.16433e-05
ENSG00000175166.12	PSMD2	-0.233805	2.18023e-05
ENSG00000160877.5	NACC1	-0.232875	2.21267e-05
ENSG00000104763.13	ASAH1	0.200036	2.21857e-05
ENSG00000181773.6	GPR3	-0.773147	2.21857e-05
ENSG00000161618.5	ALDH16A1	-0.244761	2.24131e-05
ENSG00000164284.10	GRPEL2	-0.272122	2.24593e-05
ENSG00000123737.8	EXOSC9	-0.256203	2.24672e-05
ENSG00000115165.5	CYTIP	0.279879	2.25502e-05
ENSG00000071994.6	PDCD2	-0.194939	2.25874e-05
ENSG00000128881.12	TTBK2	0.209038	2.27347e-05
ENSG00000234009.1	RPL5P34	-0.903216	2.27741e-05
ENSG00000214050.3	FBXO16	0.617456	2.27807e-05
ENSG00000169891.13	REPS2	0.848825	2.29293e-05
ENSG00000081237.14	PTPRC	0.248264	2.29293e-05
ENSG00000158615.8	PPP1R15B	-0.17604	2.31453e-05
ENSG00000108523.11	RNF167	-0.222135	2.31892e-05
ENSG00000233695.1	GAS6-AS1	0.550187	2.32305e-05
ENSG00000073050.7	XRCC1	-0.245108	2.33524e-05
ENSG00000156374.10	PCGF6	-0.293197	2.37091e-05
ENSG00000145331.9	TRMT10A	-0.34863	2.37335e-05
ENSG00000163002.8	NUP35	-0.250947	2.37881e-05
ENSG00000138166.5	DUSP5	-0.634914	2.4029e-05
ENSG00000175048.12	ZDHHC14	0.23704	2.41392e-05
ENSG00000115993.7	TRAK2	-0.252125	2.41392e-05
ENSG00000137876.5	RSL24D1	-0.264551	2.43321e-05
ENSG00000089050.10	RBBP9	-0.317457	2.44221e-05
ENSG00000154945.6	ANKRD40	-0.232404	2.48976e-05
ENSG00000161542.12	PRPSAP1	-0.266038	2.48976e-05
ENSG00000248334.2	WHAMMP2	0.229475	2.48976e-05
ENSG00000154845.11	PPP4R1	-0.223731	2.49487e-05
ENSG00000184208.10	C22orf46	-0.295737	2.51311e-05
ENSG00000244560.2	RP4-800G7.2	0.424003	2.51905e-05
ENSG00000152684.10	PELO	-0.3298	2.52163e-05
ENSG00000168615.7	ADAM9	-0.267435	2.6052e-05
ENSG00000164106.3	SCRG1	0.678019	2.60847e-05
ENSG00000182487.8	NCF1B	0.562228	2.61084e-05
ENSG00000175467.10	SART1	-0.252088	2.62071e-05
ENSG00000215009.5	ACSM4	0.525864	2.62439e-05
ENSG00000100014.15	SPECC1L	-0.223708	2.6368e-05
ENSG00000249471.3	ZNF324B	-0.261528	2.65653e-05
ENSG00000269069.1	CTC-471F3.5	0.419396	2.66e-05
ENSG00000135451.8	TROAP	-0.215747	2.6685e-05
ENSG00000058600.11	POLR3E	-0.188055	2.68402e-05
ENSG00000251045.1	CTC-321K16.4	0.778986	2.68658e-05
ENSG00000161692.13	DBF4B	-0.245674	2.70071e-05
ENSG00000203883.5	SOX18	-1.07216	2.70165e-05
ENSG00000006638.7	TBXA2R	-1.01538	2.70448e-05
ENSG00000137259.2	HIST1H2AB	-0.244276	2.70729e-05
ENSG00000240038.2	AMY2B	0.412598	2.72979e-05
ENSG00000095059.11	DHPS	-0.2229	2.72979e-05
ENSG00000114405.6	C3orf14	-0.276619	2.74227e-05
ENSG00000124357.8	NAGK	0.287488	2.78801e-05
ENSG00000177465.4	ACOT4	-0.753448	2.79237e-05
ENSG00000198826.6	ARHGAP11A	-0.208452	2.79385e-05
ENSG00000075188.4	NUP37	-0.254002	2.82945e-05
ENSG00000167723.10	TRPV3	-1.09771	2.83641e-05
ENSG00000115204.10	MPV17	0.229174	2.8447e-05
ENSG00000185340.11	GAS2L1	-0.437058	2.8749e-05
ENSG00000196296.9	ATP2A1	0.539293	2.91372e-05
ENSG00000137309.15	HMGA1	-0.228747	2.94398e-05
ENSG00000106682.10	EIF4H	-0.190743	2.95368e-05
ENSG00000186862.13	PDZD7	0.239356	2.98695e-05
ENSG00000074964.12	ARHGEF10L	0.322782	2.9914e-05
ENSG00000119335.12	SET	-0.207045	3.01083e-05
ENSG00000105877.13	DNAH11	-0.352824	3.01083e-05
ENSG00000213089.4	PDCL3P5	1.22778	3.03414e-05
ENSG00000182500.7	ORAI1	-0.284284	3.03439e-05
ENSG00000203667.5	COX20	0.292994	3.03569e-05
ENSG00000100263.9	RHBDD3	-0.260363	3.03633e-05
ENSG00000146143.13	PRIM2	-0.217233	3.03853e-05
ENSG00000145012.8	LPP	0.250265	3.05805e-05
ENSG00000196177.8	ACADSB	0.243988	3.06066e-05
ENSG00000112308.8	C6orf62	-0.174844	3.06897e-05
ENSG00000169957.8	ZNF768	-0.225731	3.08283e-05
ENSG00000005022.5	SLC25A5	-0.198375	3.10499e-05
ENSG00000213046.4	EEF1A1P32	0.606939	3.17257e-05
ENSG00000157240.2	FZD1	-0.374382	3.17848e-05
ENSG00000102900.8	NUP93	-0.212675	3.18963e-05
ENSG00000131002.7	TXLNG2P	0.294097	3.21646e-05
ENSG00000175792.7	RUVBL1	-0.202378	3.21735e-05
ENSG00000163026.7	C2orf44	-0.245084	3.22585e-05
ENSG00000108306.7	FBXL20	0.192125	3.25839e-05
ENSG00000149218.4	ENDOD1	-0.291936	3.28234e-05
ENSG00000103342.8	GSPT1	-0.179334	3.28318e-05
ENSG00000117362.8	APH1A	-0.213629	3.28531e-05
ENSG00000188321.9	ZNF559	0.276433	3.31221e-05
ENSG00000133739.11	LRRCC1	-0.295857	3.33486e-05
ENSG00000271952.1	RP11-245G13.2	-0.524225	3.33646e-05
ENSG00000262370.1	RP11-473M20.9	0.287289	3.35066e-05
ENSG00000136819.10	C9orf78	-0.211441	3.4089e-05
ENSG00000167491.13	GATAD2A	-0.191264	3.42524e-05
ENSG00000183604.10	RP11-347C12.2	0.31249	3.44425e-05
ENSG00000083799.13	CYLD	0.228787	3.44893e-05
ENSG00000120942.9	UBIAD1	-0.200846	3.47432e-05
ENSG00000113460.8	BRIX1	-0.271754	3.56646e-05
ENSG00000221995.4	TIAF1	0.387274	3.57598e-05
ENSG00000162994.11	CLHC1	0.357769	3.60685e-05
ENSG00000066135.8	KDM4A	0.165347	3.61744e-05
ENSG00000130340.10	SNX9	-0.651509	3.62513e-05
ENSG00000197530.8	MIB2	0.256899	3.62849e-05
ENSG00000177311.6	ZBTB38	-0.37347	3.63911e-05
ENSG00000224745.1	RP11-380G5.2	0.458577	3.64945e-05
ENSG00000066697.10	MSANTD3	-0.442562	3.65382e-05
ENSG00000100811.6	YY1	-0.171393	3.68984e-05
ENSG00000116922.10	C1orf109	-0.259843	3.70184e-05
ENSG00000181722.11	ZBTB20	0.544369	3.70938e-05
ENSG00000107736.15	CDH23	0.900649	3.7168e-05
ENSG00000214078.7	CPNE1	0.196493	3.74014e-05
ENSG00000196363.5	WDR5	-0.193111	3.75342e-05
ENSG00000175029.12	CTBP2	-0.176924	3.76056e-05
ENSG00000058056.4	USP13	-0.239166	3.76285e-05
ENSG00000117266.11	CDK18	0.2827	3.78106e-05
ENSG00000151376.12	ME3	0.375641	3.78803e-05
ENSG00000165526.4	RPUSD4	-0.200347	3.83308e-05
ENSG00000157557.7	ETS2	0.176856	3.85117e-05
ENSG00000140157.10	NIPA2	-0.186475	3.8707e-05
ENSG00000063244.8	U2AF2	-0.202002	3.88471e-05
ENSG00000166788.5	SAAL1	-0.259129	3.92324e-05
ENSG00000102178.8	UBL4A	-0.21099	3.94651e-05
ENSG00000171574.13	ZNF584	-0.247392	3.9584e-05
ENSG00000255790.1	RP11-711K1.7	0.895197	4.0276e-05
ENSG00000179115.6	FARSA	-0.222161	4.0396e-05
ENSG00000168175.10	MAPK1IP1L	-0.175715	4.06917e-05
ENSG00000267278.1	MAP3K14-AS1	0.537819	4.07864e-05
ENSG00000133895.10	MEN1	-0.240745	4.0846e-05
ENSG00000146350.9	TBC1D32	0.354737	4.08951e-05
ENSG00000173221.9	GLRX	0.304594	4.17138e-05
ENSG00000183273.2	CCDC60	0.513209	4.17138e-05
ENSG00000101146.8	RAE1	-0.194651	4.20355e-05
ENSG00000038002.4	AGA	-0.331114	4.20533e-05
ENSG00000215067.5	AC027763.2	0.276269	4.23549e-05
ENSG00000184348.2	HIST1H2AK	-0.335318	4.239e-05
ENSG00000146842.12	TMEM209	-0.209749	4.27343e-05
ENSG00000129187.10	DCTD	-0.21143	4.27343e-05
ENSG00000120699.8	EXOSC8	-0.198332	4.27343e-05
ENSG00000151693.5	ASAP2	-0.655814	4.27415e-05
ENSG00000251405.2	CTB-109A12.1	1.50604	4.34862e-05
ENSG00000161202.13	DVL3	-0.202445	4.37068e-05
ENSG00000131323.10	TRAF3	-0.202859	4.37796e-05
ENSG00000117305.10	HMGCL	0.274634	4.39154e-05
ENSG00000140511.7	HAPLN3	-0.813583	4.47185e-05
ENSG00000184436.7	THAP7	-0.257742	4.48064e-05
ENSG00000163257.6	DCAF16	-0.194977	4.48326e-05
ENSG00000137337.10	MDC1	-0.203055	4.50501e-05
ENSG00000204113.5	BMP2KL	0.829773	4.53249e-05
ENSG00000101574.10	METTL4	-0.285124	4.56652e-05
ENSG00000151062.10	CACNA2D4	0.19412	4.59848e-05
ENSG00000151208.12	DLG5	-0.346661	4.59848e-05
ENSG00000140259.6	MFAP1	-0.220062	4.68439e-05
ENSG00000004534.10	RBM6	0.16679	4.75631e-05
ENSG00000160271.10	RALGDS	0.227108	4.78515e-05
ENSG00000167984.12	NLRC3	-0.311165	4.82e-05
ENSG00000102241.7	HTATSF1	-0.193466	4.8319e-05
ENSG00000103423.9	DNAJA3	-0.172356	4.85698e-05
ENSG00000138663.4	COPS4	-0.212934	4.8666e-05
ENSG00000058453.12	CROCC	-0.643442	4.91267e-05
ENSG00000225793.2	RP1-234P15.4	0.692966	4.91439e-05
ENSG00000154874.10	CCDC144B	0.253277	4.9255e-05
ENSG00000131467.6	PSME3	-0.171019	4.97273e-05
ENSG00000137814.5	HAUS2	-0.212628	5.00473e-05
ENSG00000268355.1	AC006129.1	0.767734	5.0252e-05
ENSG00000172349.12	IL16	0.260574	5.06537e-05
ENSG00000167107.8	ACSF2	0.318058	5.06682e-05
ENSG00000144283.17	PKP4	-0.19073	5.10851e-05
ENSG00000125166.8	GOT2	-0.19964	5.14012e-05
ENSG00000106554.7	CHCHD3	-0.190357	5.15139e-05
ENSG00000175489.9	LRRC25	0.492597	5.18287e-05
ENSG00000213853.5	EMP2	-0.331115	5.23586e-05
ENSG00000171497.4	PPID	-0.237185	5.25078e-05
ENSG00000237135.1	DDX10P1	0.405291	5.2666e-05
ENSG00000173114.8	LRRN3	0.497861	5.28123e-05
ENSG00000156876.8	SASS6	-0.252153	5.34003e-05
ENSG00000112576.8	CCND3	-0.224005	5.46045e-05
ENSG00000254415.3	SIGLEC14	0.406118	5.46045e-05
ENSG00000205531.8	NAP1L4	-0.15935	5.46482e-05
ENSG00000079385.17	CEACAM1	1.20861	5.46822e-05
ENSG00000230069.3	LRRC37A15P	0.440698	5.46886e-05
ENSG00000050555.13	LAMC3	0.953101	5.48995e-05
ENSG00000177335.6	C8orf31	0.532333	5.50109e-05
ENSG00000230699.2	RP11-54O7.1	0.445196	5.55368e-05
ENSG00000170629.10	DPY19L2P2	-0.292779	5.5541e-05
ENSG00000188130.9	MAPK12	-0.201703	5.58611e-05
ENSG00000175886.9	RPL7AP66	-1.16459	5.60724e-05
ENSG00000224429.3	LINC00539	0.454545	5.63967e-05
ENSG00000148840.6	PPRC1	-0.20832	5.64663e-05
ENSG00000176890.11	TYMS	-0.179347	5.66416e-05
ENSG00000145220.9	LYAR	-0.216644	5.66416e-05
ENSG00000197808.7	ZNF461	0.368816	5.67157e-05
ENSG00000110719.5	TCIRG1	0.202573	5.68066e-05
ENSG00000151458.7	ANKRD50	0.274098	5.68561e-05
ENSG00000105202.3	FBL	-0.208205	5.68573e-05
ENSG00000055332.12	EIF2AK2	-0.259608	5.70807e-05
ENSG00000214367.3	HAUS3	-0.247084	5.73341e-05
ENSG00000267161.1	AC005943.5	-0.570975	5.77488e-05
ENSG00000140043.7	PTGR2	0.370883	5.78038e-05
ENSG00000146776.10	ATXN7L1	0.199964	5.82632e-05
ENSG00000197191.3	C9orf169	0.764867	5.91304e-05
ENSG00000165119.14	HNRNPK	-0.17768	5.92092e-05
ENSG00000270605.1	RP5-1092A3.4	0.688261	5.95295e-05
ENSG00000119812.14	FAM98A	-0.221481	5.96285e-05
ENSG00000198680.3	TUSC1	-0.34345	5.96399e-05
ENSG00000187164.13	KIAA1598	0.250774	6.00898e-05
ENSG00000177614.5	PGBD5	-0.660048	6.00898e-05
ENSG00000176225.8	RTTN	-0.211705	6.00898e-05
ENSG00000083093.5	PALB2	-0.191369	6.01119e-05
ENSG00000204392.6	LSM2	-0.197805	6.04332e-05
ENSG00000113108.13	APBB3	0.344643	6.08012e-05
ENSG00000173402.7	DAG1	-0.202818	6.10284e-05
ENSG00000128191.9	DGCR8	-0.189702	6.1958e-05
ENSG00000171490.8	RSL1D1	-0.185009	6.1973e-05
ENSG00000247092.2	SNHG10	-0.28494	6.19898e-05
ENSG00000175727.9	MLXIP	0.202452	6.25756e-05
ENSG00000179583.13	CIITA	0.277911	6.27998e-05
ENSG00000164691.12	TAGAP	0.195226	6.28679e-05
ENSG00000168389.13	MFSD2A	-0.230436	6.34766e-05
ENSG00000138246.11	DNAJC13	0.19912	6.36294e-05
ENSG00000215346.3	AF131215.5	0.410166	6.41904e-05
ENSG00000187008.2	PKD1L3	0.341871	6.44092e-05
ENSG00000135720.8	DYNC1LI2	0.177034	6.44635e-05
ENSG00000119969.10	HELLS	-0.211159	6.45418e-05
ENSG00000173674.6	EIF1AX	-0.225979	6.48665e-05
ENSG00000223650.1	UHRF2P1	0.852863	6.51813e-05
ENSG00000168569.7	TMEM223	-0.247949	6.54328e-05
ENSG00000237757.1	EEF1A1P30	0.381525	6.5531e-05
ENSG00000144843.7	ADPRH	-0.401186	6.59307e-05
ENSG00000187231.9	SESTD1	-0.251291	6.70991e-05
ENSG00000119383.15	PPP2R4	-0.229556	6.72486e-05
ENSG00000270562.1	RP11-154H23.3	0.490407	6.7301e-05
ENSG00000135018.9	UBQLN1	-0.184604	6.7301e-05
ENSG00000006634.3	DBF4	-0.250707	6.75188e-05
ENSG00000138380.13	CARF	0.26545	6.77157e-05
ENSG00000183605.12	SFXN4	-0.186961	6.78157e-05
ENSG00000160883.6	HK3	0.477727	6.80569e-05
ENSG00000166348.13	USP54	-0.232258	6.82683e-05
ENSG00000055044.6	NOP58	-0.193952	6.8796e-05
ENSG00000114107.4	CEP70	0.225245	6.8801e-05
ENSG00000174428.12	GTF2IRD2B	0.45537	6.9231e-05
ENSG00000125651.9	GTF2F1	-0.227995	6.94486e-05
ENSG00000156671.8	SAMD8	0.310551	6.95785e-05
ENSG00000171798.13	KNDC1	0.910226	7.01082e-05
ENSG00000144231.6	POLR2D	-0.187179	7.03335e-05
ENSG00000101333.12	PLCB4	0.638046	7.04562e-05
ENSG00000054282.11	SDCCAG8	0.220824	7.04999e-05
ENSG00000229983.1	RP11-15I11.2	-1.20166	7.06346e-05
ENSG00000151079.6	KCNA6	0.507791	7.08344e-05
ENSG00000163785.8	RYK	-0.303863	7.08344e-05
ENSG00000180104.11	EXOC3	0.180282	7.09272e-05
ENSG00000137713.11	PPP2R1B	-0.184952	7.12361e-05
ENSG00000116990.9	MYCL	-0.588716	7.12361e-05
ENSG00000185825.11	BCAP31	-0.212789	7.14429e-05
ENSG00000164338.5	UTP15	-0.238781	7.15876e-05
ENSG00000165506.10	DNAAF2	-0.223375	7.17445e-05
ENSG00000070770.4	CSNK2A2	-0.160646	7.18645e-05
ENSG00000085433.11	WDR47	0.216279	7.30046e-05
ENSG00000162062.10	C16orf59	-0.270599	7.36734e-05
ENSG00000057757.5	PITHD1	-0.203132	7.38733e-05
ENSG00000134321.7	RSAD2	0.62381	7.40088e-05
ENSG00000177788.5	RP5-1061H20.4	0.57245	7.42401e-05
ENSG00000174243.5	DDX23	-0.209105	7.42531e-05
ENSG00000165280.11	VCP	-0.179077	7.46951e-05
ENSG00000271529.1	CICP14	0.27164	7.48284e-05
ENSG00000259834.1	RP11-284N8.3	-0.597405	7.6172e-05
ENSG00000175470.14	PPP2R2D	-0.206773	7.63052e-05
ENSG00000126861.4	OMG	0.437665	7.66916e-05
ENSG00000196154.7	S100A4	0.266801	7.68415e-05
ENSG00000107281.5	NPDC1	0.239745	7.74842e-05
ENSG00000077312.4	SNRPA	-0.198038	7.88931e-05
ENSG00000227775.3	RP1-283E3.4	0.223401	7.89255e-05
ENSG00000205356.5	TECPR1	0.243656	7.89639e-05
ENSG00000130772.9	MED18	-0.260758	8.04455e-05
ENSG00000137714.2	FDX1	-0.310672	8.08135e-05
ENSG00000135070.9	ISCA1	-0.221555	8.08379e-05
ENSG00000181481.9	RNF135	-0.84827	8.1056e-05
ENSG00000139354.6	GAS2L3	-0.255671	8.11171e-05
ENSG00000095319.10	NUP188	-0.200009	8.15374e-05
ENSG00000138029.9	HADHB	0.16895	8.18671e-05
ENSG00000117528.7	ABCD3	-0.23421	8.18671e-05
ENSG00000137168.7	PPIL1	-0.227459	8.29574e-05
ENSG00000080839.7	RBL1	-0.20538	8.30661e-05
ENSG00000260855.1	RP11-439E19.10	0.588139	8.37116e-05
ENSG00000188206.5	HNRNPU-AS1	0.236286	8.41371e-05
ENSG00000187513.8	GJA4	0.943822	8.50684e-05
ENSG00000182179.6	UBA7	0.223532	8.57974e-05
ENSG00000131979.14	GCH1	-0.333216	8.60494e-05
ENSG00000152240.8	HAUS1	-0.260879	8.61414e-05
ENSG00000187837.2	HIST1H1C	-0.226395	8.61437e-05
ENSG00000079462.3	PAFAH1B3	-0.254686	8.61437e-05
ENSG00000133619.13	KRBA1	0.247712	8.75828e-05
ENSG00000188177.9	ZC3H6	0.255581	8.75828e-05
ENSG00000246451.2	RP11-894P9.1	0.32404	8.75998e-05
ENSG00000060656.15	PTPRU	-0.588149	8.80908e-05
ENSG00000166794.4	PPIB	-0.209055	8.83465e-05
ENSG00000105373.14	GLTSCR2	-0.228842	8.88489e-05
ENSG00000093183.9	SEC22C	-0.229591	8.8898e-05
ENSG00000036672.11	USP2	-0.36559	8.90363e-05
ENSG00000244879.3	GABPB1-AS1	0.210914	8.98775e-05
ENSG00000144524.13	COPS7B	-0.201548	9.01651e-05
ENSG00000074695.5	LMAN1	-0.211058	9.09461e-05
ENSG00000184990.8	SIVA1	-0.252959	9.13107e-05
ENSG00000108344.10	PSMD3	-0.212759	9.16788e-05
ENSG00000120210.6	INSL6	0.760973	9.17387e-05
ENSG00000100029.13	PES1	-0.227643	9.24888e-05
ENSG00000107614.17	TRDMT1	0.280438	9.26579e-05
ENSG00000213903.4	LTB4R	-0.226703	9.33645e-05
ENSG00000180233.9	ZNRF2	0.207193	9.38527e-05
ENSG00000117625.9	RCOR3	0.207442	9.3872e-05
ENSG00000175376.4	EIF1AD	-0.22066	9.41061e-05
ENSG00000110934.6	BIN2	0.194685	9.42874e-05
ENSG00000144647.5	POMGNT2	-0.421134	9.44489e-05
ENSG00000101096.15	NFATC2	0.210706	9.67449e-05
ENSG00000134453.11	RBM17	-0.178217	9.74697e-05
[truncated: 18,720 more rows]

## Sheet: L22 KO C16 vs DMSO
Feature	Feature_gene_name	log2FoldChange	padj
ENSG00000148303.12	RPL7A	-0.928696	1.19251e-280
ENSG00000213923.6	CSNK1E	-1.45317	5.34688e-266
ENSG00000135624.11	CCT7	-0.997968	3.94203e-264
ENSG00000163682.11	RPL9	-0.85548	4.02465e-241
ENSG00000089009.11	RPL6	-0.987294	1.70298e-174
ENSG00000164587.7	RPS14	-0.854622	9.07945e-169
ENSG00000149273.10	RPS3	-0.646417	2.45305e-149
ENSG00000122406.8	RPL5	-0.862086	9.72379e-146
ENSG00000147604.9	RPL7	-0.908953	3.84883e-144
ENSG00000125835.13	SNRPB	-0.675521	1.34069e-138
ENSG00000182899.10	RPL35A	-0.879783	4.31714e-128
ENSG00000197756.5	RPL37A	-0.878964	2.67386e-124
ENSG00000109475.12	RPL34	-1.00997	1.29933e-122
ENSG00000145425.5	RPS3A	-0.830382	1.00179e-118
ENSG00000115484.10	CCT4	-0.777466	5.27388e-118
ENSG00000075151.15	EIF4G3	-0.647933	1.95708e-114
ENSG00000146223.10	RPL7L1	-0.743094	1.11384e-110
ENSG00000174748.14	RPL15	-0.663899	2.0175e-105
ENSG00000198034.6	RPS4X	-0.656031	1.63102e-104
ENSG00000130723.13	PRRC2B	-0.670882	2.26229e-101
ENSG00000063177.8	RPL18	-0.722292	7.92814e-101
ENSG00000114391.8	RPL24	-0.728793	2.23419e-100
ENSG00000071082.6	RPL31	-0.851944	4.84832e-98
ENSG00000189091.8	SF3B3	-0.508424	4.93696e-93
ENSG00000138326.14	RPS24	-0.744439	1.11557e-86
ENSG00000171863.8	RPS7	-0.725463	3.90953e-86
ENSG00000131469.8	RPL27	-0.87052	2.34071e-84
ENSG00000167658.11	EEF2	-0.70226	8.72821e-83
ENSG00000115268.5	RPS15	-0.807514	1.51735e-79
ENSG00000229117.4	RPL41	-0.728436	3.21839e-72
ENSG00000142937.7	RPS8	-0.55928	6.43773e-70
ENSG00000129824.11	RPS4Y1	-0.625625	5.37259e-68
ENSG00000144713.8	RPL32	-0.684722	2.01276e-62
ENSG00000100316.11	RPL3	-0.537033	3.78561e-62
ENSG00000198563.9	DDX39B	-0.569078	8.88372e-60
ENSG00000187147.13	RNF220	-0.628554	7.46402e-58
ENSG00000204628.7	GNB2L1	-0.464201	6.80861e-57
ENSG00000196756.7	SNHG17	-0.638826	8.78263e-56
ENSG00000142676.8	RPL11	-0.661362	8.37533e-55
ENSG00000205937.7	RNPS1	-0.447036	8.55913e-54
ENSG00000198755.6	RPL10A	-0.48656	1.30031e-53
ENSG00000124942.9	AHNAK	0.43229	2.2286e-52
ENSG00000136942.10	RPL35	-0.702404	2.504e-51
ENSG00000124614.9	RPS10	-1.27146	4.76486e-51
ENSG00000231500.2	RPS18	-0.567433	6.65958e-51
ENSG00000124762.9	CDKN1A	0.548034	2.34252e-50
ENSG00000130255.8	RPL36	-1.09859	3.36132e-49
ENSG00000232956.4	SNHG15	-0.646536	3.87881e-49
ENSG00000125691.8	RPL23	-0.547685	5.08193e-49
ENSG00000132274.11	TRIM22	0.471325	2.69768e-48
ENSG00000134644.11	PUM1	-0.395799	8.12634e-47
ENSG00000142864.10	SERBP1	-0.386194	1.99825e-45
ENSG00000178104.15	PDE4DIP	0.377351	4.66847e-45
ENSG00000101347.7	SAMHD1	0.392302	4.997e-44
ENSG00000136010.9	ALDH1L2	-0.65545	1.00869e-43
ENSG00000140181.10	HERC2P2	0.421314	1.97069e-43
ENSG00000092621.7	PHGDH	-0.743106	1.98399e-43
ENSG00000120708.12	TGFBI	0.608216	1.83489e-42
ENSG00000265681.2	RPL17	-0.817517	3.31039e-42
ENSG00000155974.7	GRIP1	0.597715	5.41457e-39
ENSG00000101439.4	CST3	0.404089	1.49309e-38
ENSG00000167526.9	RPL13	-0.497331	5.1882e-38
ENSG00000148180.12	GSN	0.396012	4.21669e-37
ENSG00000066294.10	CD84	0.748451	2.60654e-36
ENSG00000157557.7	ETS2	0.349632	3.07898e-36
ENSG00000196531.6	NACA	-0.443743	7.25005e-35
ENSG00000063046.13	EIF4B	-0.339542	1.12162e-34
ENSG00000182578.9	CSF1R	0.440307	1.31493e-32
ENSG00000178202.8	KDELC2	-0.452065	2.55982e-32
ENSG00000137970.7	RP11-122C9.1	-0.877325	3.35321e-32
ENSG00000145592.9	RPL37	-0.544684	1.37451e-31
ENSG00000251562.3	MALAT1	0.307511	3.64784e-31
ENSG00000172716.12	SLFN11	-0.772577	3.68795e-31
ENSG00000125740.9	FOSB	1.2163	4.35331e-31
ENSG00000013364.14	MVP	0.444864	5.48354e-31
ENSG00000124767.6	GLO1	-0.47203	9.51749e-31
ENSG00000160200.13	CBS	-0.87904	1.74491e-30
ENSG00000124766.4	SOX4	0.333404	1.22984e-29
ENSG00000255833.1	TIFAB	0.325012	1.86789e-29
ENSG00000100353.13	EIF3D	-0.329633	2.62187e-28
ENSG00000161016.11	RPL8	-0.406329	2.07245e-27
ENSG00000234741.3	GAS5	-0.389828	4.30054e-27
ENSG00000198918.7	RPL39	-0.504387	9.34785e-27
ENSG00000186818.8	LILRB4	0.327977	1.04787e-26
ENSG00000161513.7	FDXR	0.475148	1.17364e-26
ENSG00000172667.6	ZMAT3	0.509182	8.12199e-26
ENSG00000171298.8	GAA	0.434491	7.4551e-25
ENSG00000094804.5	CDC6	-0.360207	1.45279e-24
ENSG00000101336.8	HCK	0.306832	1.54673e-24
ENSG00000135679.17	MDM2	0.345332	2.37088e-24
ENSG00000133048.8	CHI3L1	-0.491439	2.78574e-24
ENSG00000034510.4	TMSB10	0.348538	4.53058e-24
ENSG00000136286.10	MYO1G	0.33156	1.14644e-23
ENSG00000213462.4	ERV3-1	0.410713	1.4663e-23
ENSG00000110077.10	MS4A6A	0.417404	1.95693e-23
ENSG00000172809.8	RPL38	-0.748065	2.48039e-23
ENSG00000163156.7	SCNM1	0.375512	4.31106e-23
ENSG00000114867.15	EIF4G1	-0.288582	8.31451e-23
ENSG00000148290.5	SURF1	0.415867	1.25557e-22
ENSG00000163171.6	CDC42EP3	-0.366788	2.89866e-22
ENSG00000044574.7	HSPA5	-0.254911	3.91514e-22
ENSG00000161970.8	RPL26	-0.843232	5.57502e-22
ENSG00000159388.5	BTG2	0.531124	6.55559e-22
ENSG00000235552.4	RPL6P27	-0.955631	7.36436e-22
ENSG00000131080.10	EDA2R	0.590873	7.75245e-22
ENSG00000234797.4	RPS3AP6	-0.711823	2.62051e-21
ENSG00000104055.10	TGM5	0.387679	4.35003e-21
ENSG00000243199.1	RP11-408P14.1	-0.964585	4.58902e-21
ENSG00000135617.3	PRADC1	0.492159	5.38355e-21
ENSG00000162511.7	LAPTM5	0.287141	6.63325e-21
ENSG00000183405.5	RPS7P1	-0.743585	1.28032e-20
ENSG00000197958.8	RPL12	-0.355497	1.35936e-20
ENSG00000137154.8	RPS6	-0.422014	1.73788e-20
ENSG00000136068.10	FLNB	0.305628	1.76489e-20
ENSG00000156966.6	B3GNT7	0.283693	1.94308e-20
ENSG00000234745.5	HLA-B	0.321134	2.33129e-20
ENSG00000197965.7	MPZL1	0.314759	4.52537e-20
ENSG00000155926.9	SLA	0.412836	4.7897e-20
ENSG00000179348.7	GATA2	-1.12092	8.64481e-20
ENSG00000135842.12	FAM129A	-0.698597	1.01553e-19
ENSG00000134962.6	KLB	-1.04491	1.09685e-19
ENSG00000141540.6	TTYH2	0.517222	1.11547e-19
ENSG00000134419.11	RPS15A	-0.844645	1.66302e-19
ENSG00000123684.8	LPGAT1	-0.981049	2.39528e-19
ENSG00000100433.11	KCNK10	0.428106	2.83861e-19
ENSG00000227063.4	RPL41P1	-0.536362	5.97044e-19
ENSG00000082074.11	FYB	0.417301	8.9435e-19
ENSG00000112242.10	E2F3	-0.34305	9.09256e-19
ENSG00000197746.9	PSAP	0.280649	1.01888e-18
ENSG00000163362.6	C1orf106	-0.481047	1.1335e-18
ENSG00000160593.13	AMICA1	0.761193	1.27387e-18
ENSG00000135916.11	ITM2C	0.319207	3.79952e-18
ENSG00000168496.3	FEN1	-0.267629	5.02912e-18
ENSG00000114054.9	PCCB	0.304386	2.2134e-17
ENSG00000155660.6	PDIA4	-0.253968	2.82296e-17
ENSG00000133169.5	BEX1	0.303219	3.89776e-17
ENSG00000075391.12	RASAL2	0.28307	8.92725e-17
ENSG00000179218.9	CALR	-0.215717	1.0006e-16
ENSG00000185201.12	IFITM2	0.331405	1.1485e-16
ENSG00000166501.8	PRKCB	0.247846	1.38753e-16
ENSG00000014257.11	ACPP	0.384525	1.40198e-16
ENSG00000173890.12	GPR160	0.386864	1.49901e-16
ENSG00000127561.10	SYNGR3	0.93103	1.54145e-16
ENSG00000137812.15	CASC5	-0.256735	1.73798e-16
ENSG00000135069.9	PSAT1	-0.385444	2.03961e-16
ENSG00000164938.9	TP53INP1	0.459842	2.17268e-16
ENSG00000172890.7	NADSYN1	0.26617	2.25013e-16
ENSG00000198150.2	AC135178.1	1.54988	2.65771e-16
ENSG00000196628.9	TCF4	0.342474	3.31894e-16
ENSG00000055163.14	CYFIP2	0.470934	4.54088e-16
ENSG00000090861.11	AARS	-0.249319	4.56733e-16
ENSG00000198888.2	MT-ND1	0.312699	5.20065e-16
ENSG00000173546.7	CSPG4	0.303036	5.20065e-16
ENSG00000110042.3	DTX4	0.35982	5.26005e-16
ENSG00000132718.7	SYT11	-0.903496	5.61114e-16
ENSG00000134109.6	EDEM1	-0.243445	5.75354e-16
ENSG00000107738.15	C10orf54	0.317393	5.76349e-16
ENSG00000228682.2	RP11-439L8.3	0.730287	5.91651e-16
ENSG00000142798.12	HSPG2	0.339204	6.62554e-16
ENSG00000123146.15	CD97	0.256291	7.52086e-16
ENSG00000214485.5	CTB-13H5.1	-0.862654	7.86296e-16
ENSG00000162244.6	RPL29	-0.898623	1.26648e-15
ENSG00000064687.8	ABCA7	0.395903	1.29345e-15
ENSG00000126759.8	CFP	0.450606	1.37967e-15
ENSG00000214078.7	CPNE1	0.25989	1.80876e-15
ENSG00000105223.14	PLD3	0.343433	2.01125e-15
ENSG00000071205.7	ARHGAP10	0.373705	2.39375e-15
ENSG00000163584.13	RPL22L1	-0.370512	2.6686e-15
ENSG00000221963.5	APOL6	-0.434428	2.71223e-15
ENSG00000073910.15	FRY	0.203921	3.94598e-15
ENSG00000179294.5	C17orf96	-0.538987	3.98962e-15
ENSG00000117289.7	TXNIP	0.271516	4.86088e-15
ENSG00000110628.9	SLC22A18	0.583494	4.92548e-15
ENSG00000174776.6	WDR49	0.328036	5.69725e-15
ENSG00000125354.18	SEPT6	0.27099	6.03246e-15
ENSG00000170889.9	RPS9	-0.277774	7.49443e-15
ENSG00000170345.5	FOS	0.902473	1.13729e-14
ENSG00000173821.15	RNF213	0.255405	1.31209e-14
ENSG00000175832.8	ETV4	-0.662976	1.37689e-14
ENSG00000251022.2	THAP9-AS1	-0.445144	1.44524e-14
ENSG00000196576.10	PLXNB2	0.270511	2.0635e-14
ENSG00000244313.2	RP11-425L10.1	-0.776387	2.17042e-14
ENSG00000103187.6	COTL1	0.295375	2.19973e-14
ENSG00000175567.4	UCP2	0.281486	2.39179e-14
ENSG00000092964.12	DPYSL2	0.227141	2.803e-14
ENSG00000125657.3	TNFSF9	0.385456	2.96546e-14
ENSG00000146278.10	PNRC1	0.308865	2.9861e-14
ENSG00000135862.5	LAMC1	-0.38084	3.18662e-14
ENSG00000170581.9	STAT2	0.270969	3.26338e-14
ENSG00000166432.10	ZMAT1	0.56594	3.44485e-14
ENSG00000145506.9	NKD2	0.320639	3.61092e-14
ENSG00000196839.8	ADA	0.334793	3.74721e-14
ENSG00000122034.8	GTF3A	0.354403	4.07885e-14
ENSG00000100427.11	MLC1	0.24838	4.15408e-14
ENSG00000154767.10	XPC	0.268422	4.70135e-14
ENSG00000103257.4	SLC7A5	-0.285669	4.81445e-14
ENSG00000189057.6	FAM111B	-0.800668	4.88272e-14
ENSG00000137265.10	IRF4	0.490259	5.35432e-14
ENSG00000171631.10	P2RY6	0.367235	5.50458e-14
ENSG00000019582.10	CD74	0.314621	6.18749e-14
ENSG00000149485.12	FADS1	-0.220966	6.34319e-14
ENSG00000204406.7	MBD5	0.422216	6.49359e-14
ENSG00000055332.12	EIF2AK2	-0.406253	6.75649e-14
ENSG00000134574.7	DDB2	0.285868	7.46983e-14
ENSG00000185432.10	METTL7A	0.403135	1.29525e-13
ENSG00000221821.2	C6orf226	0.759716	1.44275e-13
ENSG00000185420.14	SMYD3	0.227815	1.5587e-13
ENSG00000228253.1	MT-ATP8	0.287606	1.65792e-13
ENSG00000142733.10	MAP3K6	-0.402675	1.89368e-13
ENSG00000152926.10	ZNF117	0.300246	2.26492e-13
ENSG00000137841.7	PLCB2	0.307659	4.02335e-13
ENSG00000128573.18	FOXP2	0.22791	4.37013e-13
ENSG00000119711.8	ALDH6A1	0.336422	4.97926e-13
ENSG00000128272.10	ATF4	-0.261558	5.50215e-13
ENSG00000152580.8	IGSF10	-0.39374	6.07275e-13
ENSG00000136026.9	CKAP4	-1.38237	6.70844e-13
ENSG00000171132.9	PRKCE	0.378995	6.96202e-13
ENSG00000025708.8	TYMP	0.349557	8.23243e-13
ENSG00000182319.5	SGK223	0.30556	1.00673e-12
ENSG00000189343.6	RPS2P46	-0.281028	1.06292e-12
ENSG00000075624.9	ACTB	0.205589	1.24712e-12
ENSG00000133313.10	CNDP2	0.247229	1.27676e-12
ENSG00000167613.11	LAIR1	0.226832	1.46575e-12
ENSG00000123338.8	NCKAP1L	0.216209	1.61578e-12
ENSG00000204469.8	PRRC2A	-0.245531	1.9285e-12
ENSG00000100504.12	PYGL	-0.203371	2.04007e-12
ENSG00000076003.4	MCM6	-0.213478	2.04007e-12
ENSG00000169093.10	ASMTL	0.273845	2.10893e-12
ENSG00000167969.8	ECI1	0.29535	2.5238e-12
ENSG00000130731.11	C16orf13	0.267717	2.98443e-12
ENSG00000189067.8	LITAF	-0.494397	3.20826e-12
ENSG00000197943.5	PLCG2	0.21962	3.38145e-12
ENSG00000154359.8	LONRF1	-0.341648	4.36516e-12
ENSG00000132600.12	PRMT7	0.255211	4.50405e-12
ENSG00000108953.12	YWHAE	-0.223082	4.6836e-12
ENSG00000134684.6	YARS	-0.208108	5.61732e-12
ENSG00000149428.14	HYOU1	-0.214126	5.61732e-12
ENSG00000156802.8	ATAD2	-0.20813	6.20733e-12
ENSG00000011600.7	TYROBP	0.401979	6.33552e-12
ENSG00000200913.1	SNORD46	-0.883243	7.11141e-12
ENSG00000129566.8	TEP1	0.260503	7.7091e-12
ENSG00000133065.6	SLC41A1	-0.519508	8.15254e-12
ENSG00000196517.7	SLC6A9	-1.10529	8.6878e-12
ENSG00000087245.8	MMP2	0.341064	9.69161e-12
ENSG00000064666.10	CNN2	0.241955	9.71828e-12
ENSG00000140988.11	RPS2	-0.251333	1.08929e-11
ENSG00000165806.15	CASP7	-0.736573	1.43201e-11
ENSG00000012048.15	BRCA1	-0.194649	1.62793e-11
ENSG00000009790.10	TRAF3IP3	0.243506	1.92767e-11
ENSG00000100599.11	RIN3	0.411679	1.97031e-11
ENSG00000206503.7	HLA-A	0.236158	2.0508e-11
ENSG00000133055.4	MYBPH	-0.284921	2.09515e-11
ENSG00000166428.8	PLD4	0.306141	2.36389e-11
ENSG00000141506.9	PIK3R5	0.231189	2.36389e-11
ENSG00000087086.9	FTL	0.230991	2.39301e-11
ENSG00000128322.6	IGLL1	-0.451963	2.96863e-11
ENSG00000227706.3	RP11-301G19.1	-0.274074	2.96863e-11
ENSG00000170275.10	CRTAP	-0.229898	2.96863e-11
ENSG00000151012.9	SLC7A11	-0.854875	3.04667e-11
ENSG00000070669.12	ASNS	-0.302047	3.10627e-11
ENSG00000235863.2	B3GALT4	0.654393	3.1837e-11
ENSG00000223907.1	RP11-439L8.4	0.623766	3.20376e-11
ENSG00000149418.6	ST14	0.318664	3.5728e-11
ENSG00000064547.9	LPAR2	0.387955	4.24884e-11
ENSG00000149635.2	OCSTAMP	-1.03491	4.29784e-11
ENSG00000204256.8	BRD2	-0.224437	4.49559e-11
ENSG00000051341.9	POLQ	-0.206442	4.70539e-11
ENSG00000159423.12	ALDH4A1	0.35795	5.57451e-11
ENSG00000146281.5	PM20D2	-0.263718	5.64816e-11
ENSG00000261069.2	SNORD116-20	0.247628	5.77364e-11
ENSG00000102580.10	DNAJC3	-0.242686	5.77364e-11
ENSG00000196220.11	SRGAP3	0.395433	5.77364e-11
ENSG00000172500.8	FIBP	0.265049	5.96405e-11
ENSG00000214389.2	RPS3AP26	-0.730915	6.03097e-11
ENSG00000145882.6	PCYOX1L	0.282735	6.57208e-11
ENSG00000200488.1	RN7SKP203	0.443233	7.6877e-11
ENSG00000168528.7	SERINC2	0.380277	8.00442e-11
ENSG00000135486.13	HNRNPA1	-0.183204	8.16876e-11
ENSG00000071054.11	MAP4K4	0.185758	8.80398e-11
ENSG00000233276.2	GPX1	0.226509	9.26378e-11
ENSG00000035681.3	NSMAF	0.206812	1.0318e-10
ENSG00000210135.1	MT-TN	0.376274	1.12418e-10
ENSG00000070614.10	NDST1	-0.590492	1.13408e-10
ENSG00000146701.7	MDH2	0.195479	1.15346e-10
ENSG00000131171.8	SH3BGRL	0.312549	1.19692e-10
ENSG00000123933.10	MXD4	0.288405	1.24957e-10
ENSG00000105953.10	OGDH	0.210516	1.42183e-10
ENSG00000113269.9	RNF130	0.255647	1.42189e-10
ENSG00000141510.11	TP53	0.192983	1.46759e-10
ENSG00000127481.10	UBR4	0.185373	1.5483e-10
ENSG00000124813.16	RUNX2	0.188738	1.5838e-10
ENSG00000142669.9	SH3BGRL3	0.286985	1.60993e-10
ENSG00000104774.8	MAN2B1	0.219367	1.60993e-10
ENSG00000022267.12	FHL1	-0.442653	1.65573e-10
ENSG00000230202.1	RP11-632C17__A.1	-0.854044	1.715e-10
ENSG00000011007.8	TCEB3	0.231669	1.78467e-10
ENSG00000164045.7	CDC25A	-0.235933	1.99446e-10
ENSG00000185088.8	RPS27L	0.286606	2.02697e-10
ENSG00000127951.5	FGL2	0.210049	2.2654e-10
ENSG00000119547.5	ONECUT2	0.231782	2.41075e-10
ENSG00000103051.14	COG4	0.257902	2.45238e-10
ENSG00000224635.1	RP4-564F22.5	-0.807257	2.75278e-10
ENSG00000163803.8	PLB1	0.432225	2.76799e-10
ENSG00000242071.2	RPL7AP6	-0.65135	3.02703e-10
ENSG00000120889.8	TNFRSF10B	0.194992	3.33724e-10
ENSG00000075340.18	ADD2	0.170424	3.58466e-10
ENSG00000160211.11	G6PD	0.252105	4.56822e-10
ENSG00000118200.10	CAMSAP2	-0.84825	4.73344e-10
ENSG00000005243.5	COPZ2	-1.05803	5.35019e-10
ENSG00000153944.6	MSI2	0.228649	5.4553e-10
ENSG00000212907.2	MT-ND4L	0.277354	5.4553e-10
ENSG00000010610.5	CD4	0.190598	5.54927e-10
ENSG00000139597.12	N4BP2L1	0.270294	6.65435e-10
ENSG00000128928.4	IVD	0.211981	6.79407e-10
ENSG00000221914.4	PPP2R2A	-0.235692	7.31027e-10
ENSG00000057657.10	PRDM1	0.611416	7.3764e-10
ENSG00000115919.10	KYNU	0.28275	7.43378e-10
ENSG00000120256.5	LRP11	-0.339411	7.55486e-10
ENSG00000100298.11	APOBEC3H	0.756137	7.67489e-10
ENSG00000100219.12	XBP1	-0.227289	7.96631e-10
ENSG00000204569.5	PPP1R10	0.196346	8.51703e-10
ENSG00000085719.7	CPNE3	-0.287001	9.15539e-10
ENSG00000148248.9	SURF4	-0.189642	9.81814e-10
ENSG00000188626.5	GOLGA8M	0.21548	1.10577e-09
ENSG00000110031.8	LPXN	0.209958	1.15652e-09
ENSG00000067836.8	ROGDI	0.300887	1.22916e-09
ENSG00000068079.3	IFI35	0.460418	1.28948e-09
ENSG00000197930.8	ERO1L	-0.312402	1.35003e-09
ENSG00000177311.6	ZBTB38	-0.531341	1.35653e-09
ENSG00000157514.12	TSC22D3	0.416436	1.38221e-09
ENSG00000059588.5	TARBP1	0.205852	1.54234e-09
ENSG00000173221.9	GLRX	0.368896	1.56774e-09
ENSG00000084070.7	SMAP2	0.206122	1.68911e-09
ENSG00000073146.11	MOV10L1	0.566179	1.7065e-09
ENSG00000174080.6	CTSF	-1.20186	1.79788e-09
ENSG00000136205.12	TNS3	0.204872	1.97913e-09
ENSG00000112893.5	MAN2A1	-0.250635	2.1403e-09
ENSG00000182511.7	FES	0.217255	2.30263e-09
ENSG00000065989.11	PDE4A	-0.490696	2.43993e-09
ENSG00000007255.6	TRAPPC6A	0.300717	2.44449e-09
ENSG00000137145.16	DENND4C	-0.346142	2.70557e-09
ENSG00000147251.11	DOCK11	0.183509	2.81495e-09
ENSG00000105967.11	TFEC	0.288116	3.18262e-09
ENSG00000125827.4	TMX4	-0.247063	3.18331e-09
ENSG00000186871.5	ERCC6L	-0.37197	3.2036e-09
ENSG00000196535.10	MYO18A	0.27781	3.2218e-09
ENSG00000178719.12	GRINA	0.244116	3.23613e-09
ENSG00000151914.13	DST	0.363237	3.57916e-09
ENSG00000215030.4	RPL13P12	-0.510599	3.61953e-09
ENSG00000030582.12	GRN	0.197745	3.96116e-09
ENSG00000163453.7	IGFBP7	0.267174	4.05614e-09
ENSG00000114126.13	TFDP2	-0.362869	4.30531e-09
ENSG00000264112.1	RP11-159D12.2	0.257085	4.53574e-09
ENSG00000225091.3	SNORA71A	-0.480837	4.55684e-09
ENSG00000125869.5	LAMP5	0.173712	4.58554e-09
ENSG00000204525.10	HLA-C	0.252439	4.6568e-09
ENSG00000132386.6	SERPINF1	0.292953	4.7306e-09
ENSG00000104964.10	AES	-0.267555	5.08179e-09
ENSG00000168778.7	TCTN2	-0.511258	5.20974e-09
ENSG00000160447.6	PKN3	-0.329574	5.51982e-09
ENSG00000224078.8	SNHG14	0.204349	5.60646e-09
ENSG00000115548.12	KDM3A	0.220206	6.14145e-09
ENSG00000100154.10	TTC28	0.185802	6.3162e-09
ENSG00000149212.6	SESN3	0.254173	6.56371e-09
ENSG00000110917.3	MLEC	-0.166126	6.74682e-09
ENSG00000081985.6	IL12RB2	-0.575794	7.17164e-09
ENSG00000196154.7	S100A4	0.227771	7.39243e-09
ENSG00000166888.6	STAT6	0.184943	7.40715e-09
ENSG00000105383.10	CD33	0.208331	7.86546e-09
ENSG00000153029.10	MR1	0.284221	8.57316e-09
ENSG00000110324.5	IL10RA	0.392178	8.71817e-09
ENSG00000124126.9	PREX1	0.193996	8.99338e-09
ENSG00000167208.10	SNX20	0.199779	9.6278e-09
ENSG00000169813.12	HNRNPF	-0.173882	9.64744e-09
ENSG00000067829.14	IDH3G	0.242746	9.64744e-09
ENSG00000151474.15	FRMD4A	0.409622	9.64744e-09
ENSG00000117245.8	KIF17	0.429804	9.69469e-09
ENSG00000133597.5	ADCK2	-0.4389	1.00257e-08
ENSG00000089486.12	CDIP1	0.275134	1.10222e-08
ENSG00000096433.6	ITPR3	-0.350234	1.10384e-08
ENSG00000166803.6	KIAA0101	-0.257595	1.12344e-08
ENSG00000143226.9	FCGR2A	0.351691	1.15334e-08
ENSG00000184465.11	WDR27	0.224076	1.15334e-08
ENSG00000175130.6	MARCKSL1	0.244031	1.21998e-08
ENSG00000100373.5	UPK3A	0.573469	1.45585e-08
ENSG00000006756.11	ARSD	0.260741	1.47204e-08
ENSG00000107551.16	RASSF4	0.201817	1.47259e-08
ENSG00000205213.9	LGR4	-0.231986	1.5491e-08
ENSG00000112773.11	FAM46A	0.264048	1.6241e-08
ENSG00000166130.10	IKBIP	-0.265339	1.65061e-08
ENSG00000260997.1	RP4-647J21.1	0.280834	1.6951e-08
ENSG00000174371.12	EXO1	-0.246813	1.74511e-08
ENSG00000197506.6	SLC28A3	0.3586	1.92044e-08
ENSG00000167815.7	PRDX2	0.179571	2.04583e-08
ENSG00000065911.7	MTHFD2	-0.218418	2.08675e-08
ENSG00000159259.7	CHAF1B	-0.236791	2.17271e-08
ENSG00000125944.14	HNRNPR	-0.162557	2.28207e-08
ENSG00000198712.1	MT-CO2	0.262807	2.40264e-08
ENSG00000168675.14	LDLRAD4	0.258338	2.48135e-08
ENSG00000180104.11	EXOC3	0.185721	2.4919e-08
ENSG00000121966.6	CXCR4	0.219746	2.63574e-08
ENSG00000107779.7	BMPR1A	-0.321342	2.67214e-08
ENSG00000189060.4	H1F0	-0.512748	2.74832e-08
ENSG00000170571.7	EMB	-0.224961	2.80439e-08
ENSG00000121211.3	MND1	-0.332176	3.08389e-08
ENSG00000140990.10	NDUFB10	0.242094	3.30423e-08
ENSG00000103197.12	TSC2	0.237659	3.30423e-08
ENSG00000088812.13	ATRN	0.151626	3.30423e-08
ENSG00000171848.9	RRM2	-0.192856	3.30423e-08
ENSG00000198695.2	MT-ND6	0.238706	3.30423e-08
ENSG00000093072.11	CECR1	0.419063	3.43913e-08
ENSG00000111144.5	LTA4H	-0.314138	3.45007e-08
ENSG00000171502.10	COL24A1	0.299497	3.50074e-08
ENSG00000160013.4	PTGIR	0.44375	3.51789e-08
ENSG00000105516.6	DBP	0.318949	3.64886e-08
ENSG00000127884.4	ECHS1	0.177639	3.69952e-08
ENSG00000029153.10	ARNTL2	-0.69454	3.73048e-08
ENSG00000196081.5	ZNF724P	-0.244307	3.73048e-08
ENSG00000125726.6	CD70	0.363163	3.7776e-08
ENSG00000077684.11	PHF17	-0.207972	3.87804e-08
ENSG00000143476.13	DTL	-0.194655	4.04082e-08
ENSG00000095970.12	TREM2	0.505407	4.1094e-08
ENSG00000166598.8	HSP90B1	-0.187804	4.1094e-08
ENSG00000136960.8	ENPP2	0.26785	4.1094e-08
ENSG00000130707.13	ASS1	-0.209686	4.13019e-08
ENSG00000180964.12	TCEAL8	-0.363538	4.29301e-08
ENSG00000132694.14	ARHGEF11	-0.356854	4.54689e-08
ENSG00000012061.11	ERCC1	0.21077	4.57582e-08
ENSG00000164796.13	CSMD3	0.192975	4.77962e-08
ENSG00000085117.7	CD82	0.253625	4.81673e-08
ENSG00000269243.1	CTD-2231E14.8	-0.25055	4.85912e-08
ENSG00000180198.11	RCC1	-0.17426	4.94417e-08
ENSG00000006534.11	ALDH3B1	0.254775	4.95623e-08
ENSG00000073578.12	SDHA	0.171131	5.10323e-08
ENSG00000186480.8	INSIG1	-0.187061	5.14901e-08
ENSG00000150782.7	IL18	-0.509691	5.32847e-08
ENSG00000117407.12	ARTN	0.435963	5.34569e-08
ENSG00000171320.10	ESCO2	-0.234928	5.71635e-08
ENSG00000196547.10	MAN2A2	0.223189	5.74794e-08
ENSG00000128815.13	WDFY4	0.170744	6.03889e-08
ENSG00000170439.5	METTL7B	-0.517101	6.07752e-08
ENSG00000136490.4	LIMD2	0.191963	6.26217e-08
ENSG00000198886.2	MT-ND4	0.248887	6.36503e-08
ENSG00000209482.1	SNORD83A	-1.06845	6.39663e-08
ENSG00000184863.6	RBM33	0.184926	6.39663e-08
ENSG00000128596.12	CCDC136	-0.528557	6.46418e-08
ENSG00000198786.2	MT-ND5	0.229773	7.00655e-08
ENSG00000048392.7	RRM2B	0.237296	7.67744e-08
ENSG00000144712.7	CAND2	-0.724896	7.80425e-08
ENSG00000186603.4	HPDL	-0.263315	7.82958e-08
ENSG00000127507.13	EMR2	0.200365	7.92777e-08
ENSG00000137642.8	SORL1	0.312878	8.53232e-08
ENSG00000077420.11	APBB1IP	0.186243	8.53896e-08
ENSG00000184640.13	SEPT9	0.204733	8.77911e-08
ENSG00000073464.7	CLCN4	0.364668	8.83871e-08
ENSG00000134824.9	FADS2	-0.185676	9.13101e-08
ENSG00000187239.12	FNBP1	0.153364	9.30722e-08
ENSG00000146192.10	FGD2	0.477898	9.32316e-08
ENSG00000263244.1	RP11-473I1.10	-0.213876	9.70307e-08
ENSG00000174307.5	PHLDA3	0.323014	9.73015e-08
ENSG00000155849.11	ELMO1	0.198015	1.01601e-07
ENSG00000184635.9	ZNF93	-0.257846	1.02419e-07
ENSG00000179364.9	PACS2	0.233715	1.04233e-07
ENSG00000165152.4	TMEM246	-0.389832	1.10678e-07
ENSG00000150961.10	SEC24D	-0.220868	1.12851e-07
ENSG00000203875.6	SNHG5	-0.244442	1.23464e-07
ENSG00000157445.10	CACNA2D3	0.427492	1.31916e-07
ENSG00000145819.11	ARHGAP26	0.203213	1.34265e-07
ENSG00000100055.16	CYTH4	0.245446	1.35101e-07
ENSG00000214021.11	TTLL3	0.235602	1.38112e-07
ENSG00000080298.11	RFX3	0.401922	1.38112e-07
ENSG00000143126.7	CELSR2	-0.480853	1.38485e-07
ENSG00000198561.8	CTNND1	0.318314	1.40522e-07
ENSG00000092010.10	PSME1	0.181735	1.4676e-07
ENSG00000026025.9	VIM	0.208139	1.47555e-07
ENSG00000100889.7	PCK2	-0.395986	1.49545e-07
ENSG00000092853.9	CLSPN	-0.184322	1.58392e-07
ENSG00000087008.11	ACOX3	0.237264	1.60091e-07
ENSG00000017427.11	IGF1	0.547916	1.60952e-07
ENSG00000251795.1	SNORA66	-1.02007	1.66658e-07
ENSG00000082146.8	STRADB	-0.381396	1.73811e-07
ENSG00000150681.5	RGS18	-0.466378	1.73811e-07
ENSG00000175727.9	MLXIP	0.186988	1.90775e-07
ENSG00000198763.3	MT-ND2	0.244834	1.92897e-07
ENSG00000103490.13	PYCARD	0.231375	1.92897e-07
ENSG00000121104.3	FAM117A	0.23597	2.15324e-07
ENSG00000054148.13	PHPT1	0.225646	2.16633e-07
ENSG00000166928.6	MS4A14	0.527811	2.23792e-07
ENSG00000168961.12	LGALS9	0.178563	2.29597e-07
ENSG00000128487.12	SPECC1	0.189164	2.3387e-07
ENSG00000196743.4	GM2A	0.201202	2.33948e-07
ENSG00000143344.11	RGL1	0.548225	2.34171e-07
ENSG00000077454.11	LRCH4	0.215602	2.37003e-07
ENSG00000126264.5	HCST	0.30302	2.44365e-07
ENSG00000013306.11	SLC25A39	0.203289	2.45334e-07
ENSG00000104823.4	ECH1	0.223473	2.48436e-07
ENSG00000100596.2	SPTLC2	-0.158153	2.5209e-07
ENSG00000124172.5	ATP5E	0.230678	2.61739e-07
ENSG00000189298.9	ZKSCAN3	0.298745	2.62713e-07
ENSG00000126602.6	TRAP1	0.184029	2.69258e-07
ENSG00000102893.11	PHKB	0.187112	2.69678e-07
ENSG00000101255.6	TRIB3	-0.453467	2.70256e-07
ENSG00000087074.7	PPP1R15A	0.290948	2.77154e-07
ENSG00000198258.6	UBL5	0.207336	2.8057e-07
ENSG00000142347.12	MYO1F	0.186255	2.82434e-07
ENSG00000197386.6	HTT	0.161875	2.89374e-07
ENSG00000205220.7	PSMB10	0.224894	3.03579e-07
ENSG00000224546.2	EIF4BP3	-0.462305	3.14911e-07
ENSG00000135940.2	COX5B	0.209722	3.28866e-07
ENSG00000108001.9	EBF3	0.257351	3.4509e-07
ENSG00000184634.11	MED12	0.184298	3.58456e-07
ENSG00000165233.13	C9orf89	0.303705	3.88793e-07
ENSG00000111348.4	ARHGDIB	0.185265	3.95616e-07
ENSG00000137710.10	RDX	-0.228562	4.09104e-07
ENSG00000051523.6	CYBA	0.222125	4.17904e-07
ENSG00000151632.12	AKR1C2	-1.03656	4.3037e-07
ENSG00000146263.7	MMS22L	-0.205162	4.35327e-07
ENSG00000141551.10	CSNK1D	-0.175977	4.35327e-07
ENSG00000100994.7	PYGB	0.188639	4.37422e-07
ENSG00000256043.2	CTSO	0.492075	4.40178e-07
ENSG00000119900.7	OGFRL1	-0.248546	4.47998e-07
ENSG00000249437.3	NAIP	0.332688	4.50505e-07
ENSG00000101210.6	EEF1A2	-0.239143	4.50592e-07
ENSG00000143401.10	ANP32E	-0.212672	4.60363e-07
ENSG00000146670.5	CDCA5	-0.188999	4.89579e-07
ENSG00000227081.4	RP11-543P15.1	0.361201	4.98995e-07
ENSG00000116717.7	GADD45A	0.448844	5.07423e-07
ENSG00000122378.9	FAM213A	-0.542405	5.30529e-07
ENSG00000099725.10	PRKY	0.22512	5.63358e-07
ENSG00000198435.2	NRARP	-0.31407	5.88149e-07
ENSG00000139668.7	WDFY2	0.173394	5.88149e-07
ENSG00000152784.11	PRDM8	-0.291614	5.94283e-07
ENSG00000065978.13	YBX1	0.17843	6.0223e-07
ENSG00000143870.8	PDIA6	-0.173531	6.03553e-07
ENSG00000161929.10	SCIMP	0.448351	6.06737e-07
ENSG00000184702.13	SEPT5	-1.07986	6.50026e-07
ENSG00000164070.7	HSPA4L	-0.260648	6.59803e-07
ENSG00000135378.3	PRRG4	-0.33437	6.59803e-07
ENSG00000106070.13	GRB10	-0.243166	6.73746e-07
ENSG00000140403.8	DNAJA4	-0.213708	6.86936e-07
ENSG00000150995.13	ITPR1	0.151512	6.90378e-07
ENSG00000121310.12	ECHDC2	-0.333338	7.12446e-07
ENSG00000115306.11	SPTBN1	-0.490681	7.39477e-07
ENSG00000201512.1	SNORA71C	-0.50441	7.3958e-07
ENSG00000210140.1	MT-TC	0.248887	7.64786e-07
ENSG00000185818.7	NAT8L	-0.314931	7.79578e-07
ENSG00000116273.5	PHF13	-0.264663	7.79578e-07
ENSG00000127824.9	TUBA4A	-0.207189	7.89063e-07
ENSG00000119408.12	NEK6	0.168156	8.23756e-07
ENSG00000084207.11	GSTP1	0.182929	8.27535e-07
ENSG00000100592.11	DAAM1	0.328764	8.3523e-07
ENSG00000186283.9	TOR3A	-0.247899	8.3523e-07
ENSG00000107438.4	PDLIM1	0.165618	8.56438e-07
ENSG00000128731.11	HERC2	0.165979	8.56438e-07
ENSG00000175193.8	PARL	0.184469	8.69574e-07
ENSG00000236154.1	RP11-343J3.2	0.484188	9.19829e-07
ENSG00000176170.9	SPHK1	-0.400899	9.38019e-07
ENSG00000198804.2	MT-CO1	0.216877	1.05357e-06
ENSG00000130714.11	POMT1	0.270665	1.06524e-06
ENSG00000268798.1	AC027307.3	-0.853591	1.08319e-06
ENSG00000167842.11	MIS12	-0.265931	1.11926e-06
ENSG00000050405.9	LIMA1	0.251535	1.13914e-06
ENSG00000127603.19	MACF1	0.130428	1.19045e-06
ENSG00000144711.9	IQSEC1	0.215191	1.20114e-06
ENSG00000157224.11	CLDN12	-0.372669	1.20114e-06
ENSG00000213983.7	AP1G2	0.27181	1.20135e-06
ENSG00000089157.11	RPLP0	0.138318	1.20274e-06
ENSG00000120694.15	HSPH1	-0.163745	1.21524e-06
ENSG00000236498.1	AC107081.5	-0.889776	1.2438e-06
ENSG00000129932.3	DOHH	-0.291784	1.25096e-06
ENSG00000132359.9	RAP1GAP2	0.299747	1.25449e-06
ENSG00000143546.5	S100A8	0.852024	1.29531e-06
ENSG00000182704.6	TSKU	-1.22085	1.30446e-06
ENSG00000153406.9	NMRAL1	0.191896	1.40738e-06
ENSG00000131398.9	KCNC3	0.223782	1.41564e-06
ENSG00000071967.7	CYBRD1	-0.248279	1.52507e-06
ENSG00000170144.14	HNRNPA3	-0.131568	1.57814e-06
ENSG00000171208.5	NETO2	-0.201378	1.62395e-06
ENSG00000079215.9	SLC1A3	0.346745	1.737e-06
ENSG00000095002.8	MSH2	-0.20473	1.74501e-06
ENSG00000173848.14	NET1	-0.219011	1.75544e-06
ENSG00000188878.12	FBF1	-0.349249	1.85175e-06
ENSG00000184009.5	ACTG1	0.155541	1.85415e-06
ENSG00000112367.6	FIG4	0.242667	1.85503e-06
ENSG00000114841.13	DNAH1	0.217025	1.98694e-06
ENSG00000185753.8	CXorf38	0.278755	2.08074e-06
ENSG00000197275.8	RAD54B	-0.353755	2.09089e-06
ENSG00000133111.3	RFXAP	-0.29679	2.09253e-06
ENSG00000198521.7	ZNF43	-0.261768	2.09994e-06
ENSG00000177030.12	DEAF1	0.218373	2.10747e-06
ENSG00000184261.4	KCNK12	-0.80563	2.11699e-06
ENSG00000250321.1	RP11-478C6.4	-0.802033	2.16618e-06
ENSG00000262061.1	RP11-1260E13.4	0.933927	2.21177e-06
ENSG00000175274.14	TP53I11	-0.441585	2.30198e-06
ENSG00000174695.5	TMEM167A	-0.175368	2.34978e-06
ENSG00000204592.5	HLA-E	0.19809	2.35191e-06
ENSG00000166145.10	SPINT1	-0.352016	2.40909e-06
ENSG00000183762.8	KREMEN1	-0.332892	2.49607e-06
ENSG00000147649.5	MTDH	-0.140273	2.49607e-06
ENSG00000109667.7	SLC2A9	0.221895	2.49785e-06
ENSG00000107819.9	SFXN3	0.155825	2.56643e-06
ENSG00000052795.8	FNIP2	-0.46007	2.69417e-06
ENSG00000106105.9	GARS	-0.19356	2.72347e-06
ENSG00000242258.1	LINC00996	0.244919	2.77086e-06
ENSG00000113368.7	LMNB1	-0.132353	2.8349e-06
ENSG00000196584.2	XRCC2	-0.185117	2.8438e-06
ENSG00000138119.12	MYOF	0.423323	2.87988e-06
ENSG00000107874.6	CUEDC2	0.194541	2.90618e-06
ENSG00000100099.16	HPS4	0.158602	2.90618e-06
ENSG00000069399.8	BCL3	0.435422	2.91681e-06
ENSG00000182179.6	UBA7	0.168051	2.94276e-06
ENSG00000168461.8	RAB31	0.208676	2.97334e-06
ENSG00000163683.7	SMIM14	0.445947	2.99284e-06
ENSG00000143398.15	PIP5K1A	-0.218165	3.02458e-06
ENSG00000124575.5	HIST1H1D	-0.211165	3.0413e-06
ENSG00000100365.10	NCF4	0.188453	3.06193e-06
ENSG00000138964.12	PARVG	0.153057	3.07568e-06
ENSG00000104635.9	SLC39A14	-0.161126	3.07568e-06
ENSG00000183044.7	ABAT	0.405699	3.09013e-06
ENSG00000115457.5	IGFBP2	-0.228723	3.12406e-06
ENSG00000148158.12	SNX30	0.204907	3.20637e-06
ENSG00000197043.9	ANXA6	0.150875	3.33583e-06
ENSG00000137474.15	MYO7A	0.250145	3.33583e-06
ENSG00000171159.4	C9orf16	0.209529	3.45005e-06
ENSG00000074695.5	LMAN1	-0.20253	3.51742e-06
ENSG00000078061.8	ARAF	0.200525	3.51939e-06
ENSG00000099958.10	DERL3	-0.353313	3.72792e-06
ENSG00000101003.8	GINS1	-0.215251	3.77741e-06
ENSG00000117305.10	HMGCL	0.26578	3.8916e-06
ENSG00000272263.1	RP11-767C1.2	-0.938787	4.01372e-06
ENSG00000161395.8	PGAP3	0.297233	4.01372e-06
ENSG00000158470.5	B4GALT5	-0.150297	4.01372e-06
ENSG00000240342.2	RPS2P5	-0.314285	4.0548e-06
ENSG00000110934.6	BIN2	0.165556	4.1421e-06
ENSG00000160948.9	VPS28	0.203322	4.29684e-06
ENSG00000186862.13	PDZD7	0.247265	4.29721e-06
ENSG00000115159.11	GPD2	-0.241965	4.31879e-06
ENSG00000128165.7	ADM2	-1.30551	4.35027e-06
ENSG00000145632.10	PLK2	0.265758	4.37389e-06
ENSG00000081377.12	CDC14B	-1.15119	4.38253e-06
ENSG00000103249.13	CLCN7	0.164498	4.38253e-06
ENSG00000163191.5	S100A11	0.246568	4.57895e-06
ENSG00000172748.8	ZNF596	0.404474	4.70296e-06
ENSG00000135404.7	CD63	0.183258	4.70423e-06
ENSG00000215068.3	AC025171.1	0.352947	4.70455e-06
ENSG00000052841.10	TTC17	0.14085	4.71926e-06
ENSG00000246273.2	SBF2-AS1	-0.628595	4.71926e-06
ENSG00000141968.3	VAV1	0.163897	4.72778e-06
ENSG00000008256.11	CYTH3	0.252278	4.73495e-06
ENSG00000103657.9	HERC1	0.130691	4.78521e-06
ENSG00000132424.10	PNISR	0.145471	4.96157e-06
ENSG00000142657.16	PGD	0.160353	5.09356e-06
ENSG00000178695.4	KCTD12	-0.405293	5.31827e-06
ENSG00000163785.8	RYK	-0.357388	5.36984e-06
ENSG00000089327.10	FXYD5	-0.228509	5.5158e-06
ENSG00000133805.11	AMPD3	0.420429	5.5158e-06
ENSG00000108379.5	WNT3	-1.04538	5.58273e-06
ENSG00000082397.11	EPB41L3	0.198188	5.67047e-06
ENSG00000229140.4	CCDC26	-0.269623	5.67343e-06
ENSG00000126749.10	EMG1	-0.198567	5.70057e-06
ENSG00000148019.8	CEP78	-0.223595	5.70057e-06
ENSG00000178996.8	SNX18	0.249752	5.70057e-06
ENSG00000080546.9	SESN1	0.30866	5.70057e-06
ENSG00000065809.9	FAM107B	-0.169376	5.73294e-06
ENSG00000171914.10	TLN2	0.41255	5.77461e-06
ENSG00000179406.6	LINC00174	0.438241	5.77461e-06
ENSG00000184886.3	PIGW	-0.293144	5.80532e-06
ENSG00000025039.10	RRAGD	-0.527884	5.84418e-06
ENSG00000207523.1	SNORA66	-1.00847	5.87141e-06
ENSG00000185340.11	GAS2L1	-0.450407	6.05743e-06
ENSG00000105750.10	ZNF85	-0.279416	6.09163e-06
ENSG00000123505.10	AMD1	-0.20009	6.11216e-06
ENSG00000104872.6	PIH1D1	0.152001	6.19048e-06
ENSG00000203760.4	CENPW	-0.23471	6.26767e-06
ENSG00000088305.14	DNMT3B	-0.331287	6.37182e-06
ENSG00000099385.7	BCL7C	0.223069	6.63796e-06
ENSG00000139174.6	PRICKLE1	-0.302014	6.66557e-06
ENSG00000157404.11	KIT	0.395106	6.9517e-06
ENSG00000076248.6	UNG	-0.18529	7.16479e-06
ENSG00000114739.9	ACVR2B	-0.250662	7.21091e-06
ENSG00000110719.5	TCIRG1	0.17792	7.22276e-06
ENSG00000128340.10	RAC2	0.208711	7.33273e-06
ENSG00000139055.2	ERP27	0.46577	7.68905e-06
ENSG00000115204.10	MPV17	0.184949	7.77747e-06
ENSG00000148488.11	ST8SIA6	0.354336	7.80021e-06
ENSG00000062524.11	LTK	0.36864	7.84595e-06
ENSG00000042286.10	AIFM2	-0.462688	7.88584e-06
ENSG00000181418.7	DDN	-0.521739	8.06899e-06
ENSG00000174083.13	PIK3R6	0.513771	8.44542e-06
ENSG00000130332.10	LSM7	0.169651	8.46298e-06
ENSG00000170906.11	NDUFA3	0.268018	8.46911e-06
ENSG00000167984.12	NLRC3	-0.35267	8.63084e-06
ENSG00000002549.8	LAP3	0.170549	8.70845e-06
ENSG00000183077.11	AFMID	0.226856	8.90871e-06
ENSG00000081237.14	PTPRC	0.174176	8.95469e-06
ENSG00000173846.8	PLK3	0.314501	8.98272e-06
ENSG00000115194.6	SLC30A3	-1.11789	9.19072e-06
ENSG00000115355.11	CCDC88A	0.165088	9.38305e-06
ENSG00000172936.8	MYD88	0.204542	9.47791e-06
ENSG00000136982.5	DSCC1	-0.209874	9.76632e-06
ENSG00000116649.5	SRM	0.189841	1.00302e-05
ENSG00000185379.16	RAD51D	-0.252701	1.02168e-05
ENSG00000228340.1	RP5-1043L13.1	0.283438	1.02289e-05
ENSG00000111640.10	GAPDH	0.143418	1.02377e-05
ENSG00000103363.10	TCEB2	0.17938	1.04559e-05
ENSG00000108064.6	TFAM	-0.200116	1.0552e-05
ENSG00000174125.3	TLR1	0.336279	1.06663e-05
ENSG00000182199.6	SHMT2	-0.162834	1.06663e-05
ENSG00000120963.7	ZNF706	0.174241	1.09787e-05
ENSG00000137842.2	TMEM62	-0.536045	1.09834e-05
ENSG00000189159.11	HN1	0.189407	1.09834e-05
ENSG00000116237.11	ICMT	-0.170531	1.1068e-05
ENSG00000171988.13	JMJD1C	0.151006	1.11032e-05
ENSG00000154654.10	NCAM2	0.304221	1.11379e-05
ENSG00000087088.15	BAX	0.19873	1.11506e-05
ENSG00000151208.12	DLG5	-0.422857	1.11506e-05
ENSG00000088854.11	C20orf194	0.172109	1.11831e-05
ENSG00000163220.10	S100A9	0.756763	1.1211e-05
ENSG00000112697.11	TMEM30A	0.161893	1.1211e-05
ENSG00000183598.3	HIST2H3D	-0.193993	1.13038e-05
ENSG00000110665.7	C11orf21	0.215539	1.13201e-05
ENSG00000163563.7	MNDA	-0.412528	1.15015e-05
ENSG00000198771.6	RCSD1	0.141135	1.15313e-05
ENSG00000177885.9	GRB2	0.140893	1.15524e-05
ENSG00000100911.9	PSME2	0.183483	1.15664e-05
ENSG00000111670.10	GNPTAB	0.166023	1.17915e-05
ENSG00000099785.6	MARCH2	0.310066	1.17915e-05
ENSG00000172992.7	DCAKD	0.199086	1.18369e-05
ENSG00000204131.6	NHSL2	0.50444	1.18407e-05
ENSG00000196715.5	VKORC1L1	-0.185038	1.19751e-05
ENSG00000154511.7	FAM69A	-0.712391	1.20635e-05
ENSG00000144218.14	AFF3	0.137109	1.22482e-05
ENSG00000139436.16	GIT2	0.155561	1.258e-05
ENSG00000156509.9	FBXO43	-0.325444	1.27567e-05
ENSG00000132475.4	H3F3B	0.149266	1.28845e-05
ENSG00000125977.6	EIF2S2	-0.161649	1.31237e-05
ENSG00000100284.16	TOM1	0.25845	1.31756e-05
ENSG00000112029.5	FBXO5	-0.190685	1.32238e-05
ENSG00000113108.13	APBB3	0.331496	1.32238e-05
ENSG00000160131.9	VMA21	-0.153923	1.32456e-05
ENSG00000101868.6	POLA1	-0.165152	1.32751e-05
ENSG00000100941.4	PNN	0.13072	1.38281e-05
ENSG00000112118.13	MCM3	-0.131106	1.40907e-05
ENSG00000077549.13	CAPZB	0.138626	1.41134e-05
ENSG00000130741.6	EIF2S3	-0.163838	1.42104e-05
ENSG00000102524.7	TNFSF13B	0.275415	1.42104e-05
ENSG00000158828.5	PINK1	0.245405	1.42795e-05
ENSG00000165801.5	ARHGEF40	0.236769	1.44438e-05
ENSG00000005108.11	THSD7A	0.19618	1.44438e-05
ENSG00000104884.10	ERCC2	0.166587	1.45031e-05
ENSG00000145703.11	IQGAP2	0.152931	1.46422e-05
ENSG00000110955.4	ATP5B	0.130895	1.46949e-05
ENSG00000144136.6	SLC20A1	-0.182519	1.49265e-05
ENSG00000116096.5	SPR	-0.273457	1.5303e-05
ENSG00000078900.10	TP73	-0.370898	1.55616e-05
ENSG00000089012.10	SIRPG	0.819301	1.56026e-05
ENSG00000144843.7	ADPRH	-0.379122	1.60186e-05
ENSG00000180353.6	HCLS1	0.134594	1.61815e-05
ENSG00000086232.8	EIF2AK1	0.137457	1.63455e-05
ENSG00000099331.9	MYO9B	0.172786	1.65006e-05
ENSG00000051108.10	HERPUD1	-0.178618	1.70777e-05
ENSG00000116062.10	MSH6	-0.147769	1.70777e-05
ENSG00000126247.6	CAPNS1	0.183683	1.72295e-05
ENSG00000145287.6	PLAC8	0.158191	1.73445e-05
ENSG00000011295.11	TTC19	0.166457	1.73791e-05
ENSG00000147874.6	HAUS6	-0.162177	1.80143e-05
ENSG00000263069.1	CTD-2047H16.4	0.339159	1.81406e-05
ENSG00000104687.8	GSR	-0.214569	1.83046e-05
ENSG00000167996.11	FTH1	0.213008	1.84397e-05
ENSG00000205356.5	TECPR1	0.240795	1.84397e-05
ENSG00000077238.9	IL4R	0.238711	1.84404e-05
ENSG00000104888.5	SLC17A7	-0.779672	1.89709e-05
ENSG00000140332.11	TLE3	0.151095	1.92058e-05
ENSG00000146410.7	MTFR2	-0.247856	1.95265e-05
ENSG00000196141.8	SPATS2L	-0.318877	1.96978e-05
ENSG00000132514.9	CLEC10A	0.424257	1.97431e-05
ENSG00000165609.8	NUDT5	0.157187	1.98893e-05
ENSG00000100097.7	LGALS1	0.191486	1.99619e-05
ENSG00000103056.7	SMPD3	0.323313	1.99619e-05
ENSG00000175305.12	CCNE2	-0.272739	1.99752e-05
ENSG00000168003.12	SLC3A2	-0.164253	2.00116e-05
ENSG00000090013.5	BLVRB	0.240166	2.01617e-05
ENSG00000167703.10	SLC43A2	0.325236	2.03866e-05
ENSG00000167994.7	RAB3IL1	-1.09876	2.06061e-05
ENSG00000085840.8	ORC1	-0.161022	2.07674e-05
ENSG00000105327.11	BBC3	0.283972	2.19144e-05
ENSG00000196588.10	MKL1	0.154087	2.20109e-05
ENSG00000182796.8	TMEM198B	0.291215	2.22085e-05
ENSG00000140538.12	NTRK3	0.710582	2.24826e-05
ENSG00000205592.9	MUC19	0.241626	2.26187e-05
ENSG00000174021.6	GNG5	0.220472	2.30474e-05
ENSG00000147459.13	DOCK5	0.124181	2.32888e-05
ENSG00000065328.12	MCM10	-0.174809	2.3614e-05
ENSG00000159267.10	HLCS	-0.219793	2.38211e-05
ENSG00000169683.3	LRRC45	-0.221704	2.44793e-05
ENSG00000266976.1	AC079466.1	-0.189993	2.48928e-05
ENSG00000010322.11	NISCH	0.179452	2.49243e-05
ENSG00000139880.15	CDH24	-0.502658	2.51171e-05
ENSG00000237819.1	AC002454.1	0.224722	2.56267e-05
ENSG00000109881.12	CCDC34	-0.284729	2.56267e-05
ENSG00000186918.9	ZNF395	-0.223751	2.57398e-05
ENSG00000129173.8	E2F8	-0.184424	2.57666e-05
ENSG00000131238.12	PPT1	0.140894	2.59025e-05
ENSG00000176597.7	B3GNT5	-0.370334	2.59025e-05
ENSG00000068903.15	SIRT2	0.174805	2.62869e-05
ENSG00000155304.4	HSPA13	-0.230776	2.68108e-05
ENSG00000125534.5	PPDPF	0.21718	2.68108e-05
ENSG00000128590.4	DNAJB9	-0.315704	2.73364e-05
ENSG00000071553.12	ATP6AP1	0.155767	2.7424e-05
ENSG00000149257.9	SERPINH1	-0.191287	2.77119e-05
ENSG00000186815.8	TPCN1	0.206411	2.78763e-05
ENSG00000163386.16	NBPF10	0.234238	2.80483e-05
ENSG00000020922.8	MRE11A	-0.145035	2.84753e-05
ENSG00000214176.5	PLEKHM1P	0.249587	2.85402e-05
ENSG00000139278.5	GLIPR1	0.205895	2.85504e-05
ENSG00000151929.5	BAG3	-0.243225	2.88059e-05
ENSG00000115365.7	LANCL1	-0.193644	2.90491e-05
ENSG00000114646.5	CSPG5	-0.574794	3.02943e-05
ENSG00000133302.8	ANKRD32	-0.241659	3.17984e-05
ENSG00000259953.1	RP11-4O1.2	0.193794	3.212e-05
ENSG00000079819.12	EPB41L2	-0.162451	3.30919e-05
ENSG00000049449.4	RCN1	-0.217121	3.35766e-05
ENSG00000184939.11	ZFP90	0.220644	3.39503e-05
ENSG00000170271.6	FAXDC2	-0.221131	3.41558e-05
ENSG00000231607.4	DLEU2	-0.197776	3.49246e-05
ENSG00000141002.14	TCF25	0.161599	3.55346e-05
ENSG00000140199.7	SLC12A6	-0.192332	3.61775e-05
ENSG00000184752.8	NDUFA12	0.198338	3.6416e-05
ENSG00000111678.6	C12orf57	-0.349467	3.65486e-05
ENSG00000215154.2	AC141586.5	0.342099	3.72387e-05
ENSG00000163428.3	LRRC58	-0.171018	3.76098e-05
ENSG00000112685.9	EXOC2	0.17322	3.7834e-05
ENSG00000118971.3	CCND2	0.151643	3.79452e-05
ENSG00000196924.10	FLNA	0.161545	3.86595e-05
ENSG00000182580.2	EPHB3	0.50929	3.89947e-05
ENSG00000110876.8	SELPLG	0.180475	3.90596e-05
ENSG00000139405.11	C12orf52	0.209692	3.91863e-05
ENSG00000077232.12	DNAJC10	-0.220258	3.97704e-05
ENSG00000198270.8	TMEM116	0.258979	3.99789e-05
ENSG00000255571.2	LINC00925	-0.320157	4.02351e-05
ENSG00000124177.10	CHD6	0.146757	4.02726e-05
ENSG00000180879.9	SSR4	0.141972	4.04214e-05
ENSG00000162783.8	IER5	0.252155	4.05555e-05
ENSG00000196209.8	SIRPB2	0.223021	4.05927e-05
ENSG00000129810.10	SGOL1	-0.257725	4.08905e-05
ENSG00000169504.10	CLIC4	-0.192105	4.10614e-05
ENSG00000010310.4	GIPR	0.279656	4.12879e-05
ENSG00000080503.15	SMARCA2	0.149533	4.16606e-05
ENSG00000002834.13	LASP1	0.15401	4.27999e-05
ENSG00000178966.11	RMI1	-0.184335	4.35135e-05
ENSG00000004478.5	FKBP4	-0.136731	4.55516e-05
ENSG00000121039.5	RDH10	-0.236191	4.65531e-05
ENSG00000106868.12	SUSD1	0.164672	4.6597e-05
ENSG00000134285.6	FKBP11	0.218141	4.69244e-05
ENSG00000136280.11	CCM2	0.190639	4.70834e-05
ENSG00000065150.14	IPO5	-0.145706	4.76037e-05
ENSG00000153815.12	CMIP	0.163322	4.82839e-05
ENSG00000115255.6	REEP6	0.225893	4.90892e-05
ENSG00000176076.6	KCNE1L	0.150113	4.97374e-05
ENSG00000160255.12	ITGB2	0.181897	5.06527e-05
ENSG00000167766.14	ZNF83	-0.282171	5.06527e-05
ENSG00000114650.14	SCAP	0.166938	5.1117e-05
ENSG00000200354.1	SNORA71D	-0.676895	5.17463e-05
ENSG00000105287.8	PRKD2	0.171267	5.18586e-05
ENSG00000130725.3	UBE2M	0.164387	5.35521e-05
ENSG00000171241.4	SHCBP1	-0.175246	5.3962e-05
ENSG00000213694.3	S1PR3	-0.216317	5.39892e-05
ENSG00000141858.7	SAMD1	-0.204994	5.40666e-05
ENSG00000127663.10	KDM4B	0.159368	5.48809e-05
ENSG00000171840.7	NINJ2	0.340359	5.53236e-05
ENSG00000198680.3	TUSC1	-0.298432	5.55023e-05
ENSG00000069011.11	PITX1	0.17725	5.6292e-05
ENSG00000162623.11	TYW3	-0.201183	5.64976e-05
ENSG00000083290.15	ULK2	-0.317626	5.66751e-05
ENSG00000197142.6	ACSL5	-0.211551	5.68402e-05
ENSG00000104043.10	ATP8B4	0.142407	5.78312e-05
ENSG00000210196.2	MT-TP	0.428277	5.81496e-05
ENSG00000170779.10	CDCA4	-0.174237	5.87454e-05
ENSG00000163257.6	DCAF16	-0.148897	5.87762e-05
ENSG00000089057.10	SLC23A2	0.14052	5.88675e-05
ENSG00000115738.5	ID2	0.252022	5.94105e-05
ENSG00000135549.10	PKIB	0.275535	5.96749e-05
ENSG00000235112.1	RP11-628K18.1	-0.732707	6.04969e-05
ENSG00000179855.5	GIPC3	-0.619441	6.08255e-05
ENSG00000167566.12	NCKAP5L	0.206287	6.08255e-05
ENSG00000171174.9	RBKS	0.337406	6.08255e-05
ENSG00000196498.9	NCOR2	0.204304	6.10359e-05
ENSG00000198899.2	MT-ATP6	0.210055	6.11245e-05
ENSG00000233382.5	NKAPP1	0.160047	6.13105e-05
ENSG00000122641.9	INHBA	-0.167022	6.30988e-05
ENSG00000108561.4	C1QBP	0.129104	6.36918e-05
ENSG00000013288.4	MAN2B2	0.179969	6.39726e-05
ENSG00000146094.9	DOK3	0.178637	6.52152e-05
ENSG00000164244.16	PRRC1	-0.175428	6.54375e-05
ENSG00000143110.7	C1orf162	0.229384	6.67386e-05
ENSG00000134986.9	NREP	0.172027	6.67386e-05
ENSG00000204356.7	NELFE	0.170597	6.7033e-05
ENSG00000134901.8	KDELC1	-0.972187	6.86673e-05
ENSG00000172795.11	DCP2	-0.139322	6.90537e-05
ENSG00000197563.5	PIGN	-0.164216	6.98411e-05
ENSG00000105649.5	RAB3A	0.265819	7.05001e-05
ENSG00000152582.8	SPEF2	-0.220263	7.08315e-05
ENSG00000164754.8	RAD21	-0.154469	7.09404e-05
ENSG00000169105.6	CHST14	-0.28116	7.31092e-05
ENSG00000139626.11	ITGB7	0.199936	7.32712e-05
ENSG00000166881.5	TMEM194A	-0.173774	7.32712e-05
ENSG00000028137.12	TNFRSF1B	0.152899	7.4592e-05
ENSG00000137106.13	GRHPR	0.160165	7.47343e-05
ENSG00000118308.10	LRMP	0.186815	7.49921e-05
ENSG00000176533.8	GNG7	0.278292	7.52233e-05
ENSG00000147394.14	ZNF185	0.142795	7.73353e-05
ENSG00000023909.5	GCLM	-0.201091	7.76941e-05
ENSG00000160075.10	SSU72	-0.160521	7.85393e-05
ENSG00000101220.13	C20orf27	0.147284	7.89341e-05
ENSG00000141068.9	KSR1	-0.234987	7.90389e-05
ENSG00000185477.4	GPRIN3	-0.808885	7.97513e-05
ENSG00000124486.8	USP9X	0.119671	7.99249e-05
ENSG00000183242.7	WT1-AS	-0.207875	8.19917e-05
ENSG00000204287.9	HLA-DRA	0.365826	8.24098e-05
ENSG00000070081.11	NUCB2	-0.125987	8.25623e-05
ENSG00000157212.14	PAXIP1	-0.161181	8.25623e-05
ENSG00000229939.1	RP11-111F16.2	-0.442455	8.25623e-05
ENSG00000108424.5	KPNB1	-0.113957	8.34733e-05
ENSG00000155858.5	LSM11	-0.249375	8.52551e-05
ENSG00000162631.14	NTNG1	0.685688	8.6657e-05
ENSG00000249859.3	PVT1	0.200031	8.73549e-05
ENSG00000204899.5	MZT1	-0.317452	8.77501e-05
ENSG00000118193.7	KIF14	-0.162845	8.82633e-05
ENSG00000105204.9	DYRK1B	0.249845	8.84081e-05
ENSG00000086200.12	IPO11	-0.18254	8.88333e-05
ENSG00000257151.1	PWAR6	0.218901	8.93776e-05
ENSG00000120837.3	NFYB	-0.225392	8.99142e-05
ENSG00000250337.1	LINC01021	0.212108	9.1368e-05
ENSG00000206149.6	HERC2P9	0.190041	9.1483e-05
ENSG00000133739.11	LRRCC1	-0.201363	9.19882e-05
ENSG00000105048.12	TNNT1	-0.555628	9.28453e-05
ENSG00000116497.13	S100PBP	-0.177449	9.30229e-05
ENSG00000132549.14	VPS13B	0.130124	9.37916e-05
ENSG00000138346.10	DNA2	-0.179703	9.41382e-05
ENSG00000188042.5	ARL4C	0.211817	9.42845e-05
ENSG00000026508.12	CD44	0.140183	9.43299e-05
ENSG00000127311.5	HELB	0.173547	9.64873e-05
ENSG00000100300.13	TSPO	0.140454	9.68388e-05
ENSG00000100271.12	TTLL1	0.343022	9.69433e-05
ENSG00000125772.8	GPCPD1	0.150379	9.83737e-05
ENSG00000145348.12	TBCK	0.168469	9.84219e-05
ENSG00000213930.7	GALT	0.262472	9.8512e-05
ENSG00000172954.9	LCLAT1	-0.206679	9.86254e-05
ENSG00000127022.10	CANX	-0.127828	9.98248e-05
ENSG00000149328.10	GLB1L2	0.209999	0.000100773
ENSG00000262944.1	RP11-473I1.9	-0.221218	0.000101252
ENSG00000142149.4	HUNK	-0.672334	0.000102042
ENSG00000062716.6	VMP1	0.190249	0.000102062
ENSG00000090376.4	IRAK3	0.128791	0.000102197
ENSG00000112715.16	VEGFA	-0.238078	0.000102197
ENSG00000183401.7	CCDC159	0.238754	0.000103368
ENSG00000006047.8	YBX2	-0.99666	0.000103368
ENSG00000166483.6	WEE1	-0.167433	0.000103368
ENSG00000087903.8	RFX2	0.169455	0.000104507
ENSG00000114850.2	SSR3	-0.182193	0.000104864
ENSG00000065518.7	NDUFB4	0.197986	0.000105445
ENSG00000168671.5	UGT3A2	-0.827755	0.000105665
ENSG00000118276.7	B4GALT6	-0.40924	0.000106659
ENSG00000079308.12	TNS1	0.171828	0.000106671
ENSG00000130294.10	KIF1A	0.960232	0.000107733
ENSG00000113407.9	TARS	-0.161287	0.000108558
ENSG00000165795.16	NDRG2	-0.527709	0.0001101
ENSG00000143228.8	NUF2	-0.189378	0.000110847
ENSG00000102401.15	ARMCX3	-0.216396	0.000111141
ENSG00000103876.7	FAH	0.175428	0.000111141
ENSG00000246877.1	DNM1P35	0.281946	0.00011406
ENSG00000177675.4	CD163L1	0.323191	0.000114138
ENSG00000092847.6	AGO1	0.128271	0.000117072
ENSG00000135482.2	ZC3H10	0.263213	0.000117791
ENSG00000138293.15	NCOA4	-0.167259	0.000117869
ENSG00000154760.9	SLFN13	-0.511802	0.000118412
ENSG00000213853.5	EMP2	-0.314244	0.000119819
ENSG00000140450.7	ARRDC4	0.271064	0.000121533
ENSG00000163382.7	APOA1BP	0.170952	0.000121833
ENSG00000089060.7	SLC8B1	0.189867	0.000122158
ENSG00000008394.8	MGST1	-0.182298	0.000122462
ENSG00000144746.6	ARL6IP5	0.184219	0.000122462
ENSG00000172757.8	CFL1	0.141363	0.000122635
ENSG00000163406.6	SLC15A2	0.161632	0.000122832
ENSG00000177272.7	KCNA3	-0.37439	0.000122982
ENSG00000181790.6	BAI1	0.43986	0.000122982
ENSG00000151176.3	PLBD2	0.189993	0.000122982
ENSG00000182287.9	AP1S2	0.191288	0.0001268
ENSG00000040199.14	PHLPP2	-0.347068	0.000128346
ENSG00000133943.16	C14orf159	0.137079	0.000128722
ENSG00000096092.5	TMEM14A	-0.855223	0.000129161
ENSG00000239713.3	APOBEC3G	0.218565	0.000129161
ENSG00000259712.1	CTD-2184D3.5	0.284059	0.000129161
ENSG00000135441.3	BLOC1S1	0.20365	0.000131662
ENSG00000185215.4	TNFAIP2	0.155532	0.000132059
ENSG00000158869.6	FCER1G	0.257902	0.000132151
ENSG00000159055.3	MIS18A	-0.209123	0.000132709
ENSG00000187164.13	KIAA1598	0.213344	0.000135323
ENSG00000113504.15	SLC12A7	0.180929	0.000135395
ENSG00000176978.9	DPP7	0.171577	0.000135806
ENSG00000163932.9	PRKCD	0.129613	0.000137383
ENSG00000094916.9	CBX5	0.120929	0.000137406
ENSG00000169258.6	GPRIN1	-0.353921	0.000138198
ENSG00000096968.8	JAK2	0.182559	0.000138198
ENSG00000123080.6	CDKN2C	-0.185086	0.000139619
ENSG00000112306.7	RPS12	0.176936	0.000139911
ENSG00000163947.7	ARHGEF3	0.173119	0.000140938
ENSG00000101574.10	METTL4	-0.261018	0.000141191
ENSG00000272405.1	RP11-284F21.10	0.416592	0.000141432
ENSG00000146540.10	C7orf50	0.17484	0.000141526
ENSG00000149806.6	FAU	0.153779	0.000144918
ENSG00000105290.7	APLP1	-0.447496	0.000144918
ENSG00000148700.9	ADD3	-0.212659	0.000145057
ENSG00000128595.12	CALU	-0.143608	0.00014509
ENSG00000182774.6	RPS17L	-0.717549	0.00014702
ENSG00000171522.5	PTGER4	0.142457	0.000147163
ENSG00000259834.1	RP11-284N8.3	-0.584755	0.000149167
ENSG00000101608.8	MYL12A	0.175766	0.000149711
ENSG00000044090.4	CUL7	0.207947	0.00014985
ENSG00000100749.3	VRK1	-0.169377	0.000151384
ENSG00000139734.13	DIAPH3	-0.176988	0.000151971
ENSG00000170734.7	POLH	0.180925	0.000152264
ENSG00000155254.8	MARVELD1	-0.156043	0.000152848
ENSG00000148484.13	RSU1	0.147941	0.000153112
ENSG00000148655.10	C10orf11	0.302013	0.000154022
ENSG00000169738.3	DCXR	0.164932	0.000154022
ENSG00000036672.11	USP2	-0.307979	0.000154022
ENSG00000131188.7	PRR7	-0.37127	0.000154942
ENSG00000213160.5	KLHL23	-0.637472	0.000159454
ENSG00000105011.4	ASF1B	-0.148173	0.0001605
ENSG00000173530.5	TNFRSF10D	0.183811	0.0001605
ENSG00000029993.10	HMGB3	-0.149883	0.000160716
ENSG00000171791.10	BCL2	-0.119229	0.000162349
ENSG00000108840.11	HDAC5	0.164604	0.000162543
ENSG00000156261.8	CCT8	-0.126541	0.000162679
ENSG00000134247.9	PTGFRN	-0.200063	0.000168762
ENSG00000141556.16	TBCD	0.152928	0.000169549
ENSG00000198727.2	MT-CYB	0.196803	0.000171441
ENSG00000113719.11	ERGIC1	0.149219	0.000171851
ENSG00000160072.15	ATAD3B	-0.188428	0.00017191
ENSG00000117280.8	RAB7L1	-0.231741	0.000175141
ENSG00000073331.13	ALPK1	0.188083	0.000175867
ENSG00000108107.8	RPL28	0.185636	0.000175958
ENSG00000011028.9	MRC2	0.144761	0.000176816
ENSG00000140688.12	C16orf58	0.182434	0.000178878
ENSG00000136169.12	SETDB2	0.13736	0.000179063
ENSG00000173930.8	SLCO4C1	-0.638921	0.000179528
ENSG00000151553.10	FAM160B1	-0.207241	0.000180453
ENSG00000026297.11	RNASET2	0.146617	0.000181151
ENSG00000090520.6	DNAJB11	-0.160459	0.000181493
ENSG00000165140.5	FBP1	0.261457	0.000181493
ENSG00000166949.11	SMAD3	0.166371	0.000181493
ENSG00000100906.6	NFKBIA	0.176968	0.000182184
ENSG00000145284.7	SCD5	-1.16361	0.00018301
ENSG00000109790.12	KLHL5	-0.409016	0.000183349
ENSG00000104341.12	LAPTM4B	-0.299039	0.000184175
ENSG00000040275.12	SPDL1	-0.158423	0.000184175
ENSG00000136868.9	SLC31A1	-0.170402	0.000184175
ENSG00000165490.8	C11orf82	-0.198102	0.000185396
ENSG00000120686.7	UFM1	-0.205614	0.000186017
ENSG00000138386.12	NAB1	-0.212209	0.000188659
ENSG00000148672.7	GLUD1	0.166186	0.00018869
ENSG00000110090.8	CPT1A	0.109691	0.000190066
ENSG00000116641.11	DOCK7	-0.197931	0.000196304
ENSG00000172840.2	PDP2	-0.188206	0.000199099
ENSG00000185633.6	NDUFA4L2	-0.508519	0.000200255
ENSG00000054965.6	FAM168A	0.148708	0.000202417
ENSG00000028277.16	POU2F2	0.190254	0.000202417
ENSG00000151065.9	DCP1B	0.229931	0.000208052
ENSG00000060982.10	BCAT1	-0.176512	0.000208732
ENSG00000204604.5	ZNF468	-0.261356	0.00020889
ENSG00000197535.10	MYO5A	0.149384	0.000209196
ENSG00000104419.10	NDRG1	0.16878	0.000209295
ENSG00000151079.6	KCNA6	0.58359	0.000209295
ENSG00000137101.8	CD72	0.364683	0.000210661
ENSG00000187210.8	GCNT1	0.183366	0.000210661
ENSG00000147872.5	PLIN2	-0.276198	0.000211916
ENSG00000169991.6	IFFO2	-0.452301	0.000212091
ENSG00000149476.10	DAK	0.183475	0.000214317
ENSG00000147324.6	MFHAS1	-0.168515	0.000214905
ENSG00000157227.8	MMP14	-0.137106	0.000214913
ENSG00000130724.4	CHMP2A	0.15542	0.000215716
ENSG00000159147.13	DONSON	-0.206037	0.000216722
ENSG00000215114.3	UBXN2B	-0.147881	0.000218229
ENSG00000111674.4	ENO2	-0.648659	0.000218816
ENSG00000020633.14	RUNX3	0.138864	0.000219867
ENSG00000138613.9	APH1B	-0.203675	0.000219867
ENSG00000180822.7	PSMG4	0.198256	0.000220045
ENSG00000092820.13	EZR	-0.120205	0.000222575
ENSG00000134954.10	ETS1	-0.492272	0.000223007
ENSG00000130158.9	DOCK6	0.171738	0.000224483
ENSG00000244560.2	RP4-800G7.2	0.408453	0.000224502
ENSG00000203879.7	GDI1	0.180499	0.000224502
ENSG00000180628.10	PCGF5	-0.239831	0.000226995
ENSG00000204576.7	PRR3	0.179246	0.000229236
ENSG00000105520.6	DKFZP761J1410	0.149096	0.000229898
ENSG00000103024.3	NME3	0.201111	0.000229898
ENSG00000151718.11	WWC2	-0.31806	0.00023031
ENSG00000136436.10	CALCOCO2	0.137546	0.000231848
ENSG00000153044.5	CENPH	-0.23012	0.000231848
ENSG00000179222.13	MAGED1	-0.450157	0.000233147
ENSG00000125430.4	HS3ST3B1	0.193317	0.00023356
ENSG00000105173.9	CCNE1	-0.174252	0.00023356
ENSG00000204371.7	EHMT2	0.150728	0.00023356
ENSG00000134287.5	ARF3	0.12731	0.000234541
ENSG00000164620.4	RELL2	0.215368	0.000236735
ENSG00000009724.12	MASP2	0.381345	0.000236735
ENSG00000131979.14	GCH1	-0.329012	0.000236735
ENSG00000138594.8	TMOD3	-0.153466	0.000237325
ENSG00000257923.5	CUX1	0.124426	0.000238803
ENSG00000005339.8	CREBBP	0.153182	0.000239473
ENSG00000184619.3	KRBA2	0.900262	0.000239776
ENSG00000135090.9	TAOK3	0.116386	0.000241446
ENSG00000138029.9	HADHB	0.163186	0.000244499
ENSG00000145833.11	DDX46	-0.113983	0.000245059
ENSG00000143952.15	VPS54	-0.19494	0.000246551
ENSG00000132530.12	XAF1	0.166305	0.000252054
ENSG00000107521.14	HPS1	0.15767	0.000254754
ENSG00000107282.5	APBA1	0.196678	0.000255544
ENSG00000197619.9	ZNF615	-0.300164	0.000257269
ENSG00000100243.16	CYB5R3	0.151681	0.000257269
ENSG00000125089.12	SH3TC1	0.419672	0.000259069
ENSG00000156253.2	RWDD2B	0.213049	0.000259069
ENSG00000156521.9	TYSND1	-0.174183	0.000259691
ENSG00000107281.5	NPDC1	0.203073	0.000260558
ENSG00000154640.10	BTG3	-0.321119	0.000260568
ENSG00000134516.11	DOCK2	0.111541	0.000261095
ENSG00000173852.9	DPY19L1	-0.208881	0.000261894
ENSG00000148450.8	MSRB2	0.303024	0.000264155
ENSG00000115107.15	STEAP3	-0.207599	0.000266301
ENSG00000142949.12	PTPRF	-0.761647	0.000266474
ENSG00000136003.11	ISCU	0.181451	0.000266477
ENSG00000075568.12	TMEM131	0.136541	0.000268127
ENSG00000196295.7	AC005154.6	0.147286	0.000269243
ENSG00000058453.12	CROCC	-0.601803	0.000273875
ENSG00000185869.9	ZNF829	-0.417616	0.000276981
ENSG00000153989.7	NUS1	-0.195134	0.000280222
ENSG00000060138.8	YBX3	0.118671	0.000284264
ENSG00000185187.8	SIGIRR	0.199872	0.00028756
ENSG00000184840.7	TMED9	-0.159348	0.000291377
ENSG00000157216.11	SSBP3	0.174188	0.000292377
ENSG00000117411.12	B4GALT2	-0.174287	0.000292377
ENSG00000169398.15	PTK2	0.155695	0.000293018
ENSG00000204859.7	ZBTB48	0.180077	0.000293952
ENSG00000155368.12	DBI	0.202105	0.000296269
ENSG00000072571.15	HMMR	-0.157735	0.000298781
ENSG00000105409.11	ATP1A3	0.188416	0.000299489
ENSG00000149554.8	CHEK1	-0.163896	0.000300972
ENSG00000006125.12	AP2B1	0.121026	0.000302751
ENSG00000138629.11	UBL7	0.188496	0.000302965
ENSG00000196975.10	ANXA4	0.179079	0.000306018
ENSG00000069188.12	SDK2	0.217677	0.000306018
ENSG00000176087.10	SLC35A4	-0.158421	0.000306637
ENSG00000115687.9	PASK	-0.148651	0.000306637
ENSG00000167792.7	NDUFV1	0.124251	0.00031063
ENSG00000197183.8	C20orf112	-0.156046	0.000312082
ENSG00000186432.4	KPNA4	-0.145741	0.000314133
ENSG00000198373.8	WWP2	0.141516	0.000314133
ENSG00000160766.10	GBAP1	0.30303	0.000317635
ENSG00000006652.9	IFRD1	0.197869	0.000319754
ENSG00000254429.1	CTD-2562J17.7	0.202315	0.000321919
ENSG00000213762.6	ZNF134	0.174327	0.000321991
ENSG00000071127.12	WDR1	0.134751	0.000322526
ENSG00000185269.7	NOTUM	-0.954956	0.000323651
ENSG00000097046.8	CDC7	-0.16943	0.000323923
ENSG00000184787.14	UBE2G2	0.115787	0.000324798
ENSG00000133703.7	KRAS	-0.184782	0.000325508
ENSG00000108298.5	RPL19	0.144853	0.000328989
ENSG00000100325.10	ASCC2	0.156103	0.000332848
ENSG00000148680.11	HTR7	0.287248	0.000334924
ENSG00000167723.10	TRPV3	-1.09131	0.000335027
ENSG00000040933.11	INPP4A	0.131743	0.000335027
ENSG00000119326.10	CTNNAL1	-0.317065	0.00033622
ENSG00000094631.14	HDAC6	0.16496	0.00033622
ENSG00000165118.10	C9orf64	-0.238641	0.000337541
ENSG00000244462.3	RBM12	-0.126112	0.000338767
ENSG00000136854.13	STXBP1	0.26014	0.000340805
ENSG00000142227.6	EMP3	0.180353	0.000346024
ENSG00000117593.8	DARS2	-0.171899	0.000348265
ENSG00000107960.6	OBFC1	0.284759	0.000349244
ENSG00000108852.10	MPP2	-0.417095	0.000356608
ENSG00000158985.9	CDC42SE2	0.1517	0.000358942
ENSG00000158104.7	HPD	0.23517	0.000361007
ENSG00000109323.4	MANBA	0.182495	0.000365801
ENSG00000212802.3	RPL15P3	-0.463844	0.000367901
ENSG00000178685.9	PARP10	0.222988	0.000368306
ENSG00000179526.12	SHARPIN	0.190842	0.000370343
ENSG00000119321.4	FKBP15	0.133824	0.000370387
ENSG00000138160.4	KIF11	-0.124571	0.000372346
ENSG00000150540.9	HNMT	0.187427	0.00037296
ENSG00000145050.11	MANF	-0.198574	0.00037475
ENSG00000270022.2	RNU12	0.345382	0.00037933
ENSG00000143079.10	CTTNBP2NL	0.28609	0.000383473
ENSG00000168090.5	COPS6	0.159556	0.000383624
ENSG00000095951.12	HIVEP1	-0.19462	0.000387978
ENSG00000010404.13	IDS	0.216201	0.00038862
ENSG00000179981.9	TSHZ1	-0.131752	0.000389001
ENSG00000116990.9	MYCL	-0.574897	0.000391015
ENSG00000224982.2	TMEM233	0.184687	0.000391202
ENSG00000128016.4	ZFP36	0.169096	0.000392644
ENSG00000170037.9	CNTROB	0.1465	0.000395179
ENSG00000126267.4	COX6B1	0.152825	0.00039677
ENSG00000241839.5	PLEKHO2	0.193167	0.000396811
ENSG00000170310.10	STX8	0.199094	0.000400268
ENSG00000131127.9	ZNF141	-0.224073	0.000400518
ENSG00000148843.9	PDCD11	0.104432	0.000400561
ENSG00000186468.8	RPS23	0.132029	0.000401021
ENSG00000116353.11	MECR	0.206888	0.00040378
ENSG00000127419.12	TMEM175	0.231789	0.000404633
ENSG00000159873.5	CCDC117	-0.189555	0.000404633
ENSG00000140400.10	MAN2C1	0.150284	0.000407835
ENSG00000169189.12	NSMCE1	0.187471	0.000408467
ENSG00000181827.10	RFX7	0.128966	0.000411019
ENSG00000161544.5	CYGB	1.17503	0.000411704
ENSG00000121281.8	ADCY7	0.165635	0.000416724
ENSG00000007968.6	E2F2	-0.178352	0.000416724
ENSG00000135736.5	CCDC102A	-0.382246	0.000416724
ENSG00000136492.4	BRIP1	-0.144543	0.000418123
ENSG00000163867.12	ZMYM6	0.214373	0.000418486
ENSG00000106799.8	TGFBR1	-0.174657	0.000418486
ENSG00000198363.11	ASPH	0.136285	0.000421599
ENSG00000184154.8	LRTOMT	0.268663	0.000423074
ENSG00000120802.9	TMPO	-0.165002	0.00042599
ENSG00000196670.9	ZFP62	0.176415	0.00042736
ENSG00000057935.9	MTA3	-0.384179	0.00042736
ENSG00000166436.11	TRIM66	0.158756	0.000428315
ENSG00000129675.11	ARHGEF6	0.137383	0.000428379
ENSG00000171757.11	LRRC34	-0.252396	0.000428379
ENSG00000198805.7	PNP	0.127505	0.000428379
ENSG00000162522.6	KIAA1522	-0.350102	0.00042929
ENSG00000158517.9	NCF1	0.364462	0.000430725
ENSG00000188827.6	SLX4	0.141906	0.000430907
ENSG00000148835.9	TAF5	-0.211391	0.000431743
ENSG00000107863.12	ARHGAP21	-0.212779	0.000431743
ENSG00000105379.5	ETFB	0.24215	0.000433716
ENSG00000089639.6	GMIP	0.144698	0.000434959
ENSG00000117500.8	TMED5	-0.183088	0.000442487
ENSG00000259623.1	RP11-156E6.1	-0.2623	0.000444441
ENSG00000170043.7	TRAPPC1	0.142395	0.000445108
ENSG00000149218.4	ENDOD1	-0.237266	0.000445238
ENSG00000109066.9	TMEM104	0.171124	0.000447108
ENSG00000197915.5	HRNR	-0.796714	0.000450776
ENSG00000109674.3	NEIL3	-0.181394	0.000450946
ENSG00000104626.10	ERI1	-0.161845	0.000453283
ENSG00000126803.8	HSPA2	-0.331006	0.000456282
ENSG00000128185.5	DGCR6L	0.197461	0.000464474
ENSG00000179041.2	RRS1	-0.155845	0.000469195
ENSG00000065413.12	ANKRD44	0.1494	0.000469483
ENSG00000182168.10	UNC5C	-0.11206	0.000470572
ENSG00000198677.6	TTC37	0.143804	0.00047063
ENSG00000134897.9	BIVM	-0.298858	0.000474445
ENSG00000107959.11	PITRM1	0.144599	0.000479806
ENSG00000206621.1	SNORD116-14	0.334021	0.000480999
ENSG00000256087.2	ZNF432	-0.266682	0.000485854
ENSG00000100360.10	IFT27	0.180182	0.000486331
ENSG00000111860.9	CEP85L	-0.41318	0.000486331
ENSG00000197603.9	C5orf42	-0.239726	0.000486331
ENSG00000165244.6	ZNF367	-0.163305	0.000488318
ENSG00000106789.8	CORO2A	-0.474615	0.000489523
ENSG00000141698.12	NT5C3B	-0.371743	0.000489574
ENSG00000043462.7	LCP2	0.141657	0.000499328
ENSG00000213442.4	RPL18AP3	0.254461	0.000501949
ENSG00000099875.10	MKNK2	0.141135	0.000507925
ENSG00000205730.5	ITPRIPL2	-0.935437	0.000513842
ENSG00000114388.8	NPRL2	0.184453	0.000513842
ENSG00000179583.13	CIITA	0.250467	0.00051481
ENSG00000131089.9	ARHGEF9	0.21535	0.00051514
ENSG00000183283.11	DAZAP2	0.145125	0.000515715
ENSG00000176659.5	C20orf197	0.181676	0.000518202
ENSG00000074696.8	PTPLAD1	-0.150137	0.000519812
ENSG00000104738.12	MCM4	-0.111616	0.000522302
ENSG00000205744.5	DENND1C	0.151558	0.000526818
ENSG00000142546.9	NOSIP	0.165942	0.000528945
ENSG00000113810.11	SMC4	-0.117159	0.000529031
ENSG00000122859.4	NEUROG3	0.247656	0.000529037
ENSG00000004700.11	RECQL	-0.151486	0.000529082
ENSG00000197948.6	FCHSD1	0.177393	0.000530629
ENSG00000151461.15	UPF2	-0.123209	0.000532815
ENSG00000163807.4	KIAA1143	-0.174129	0.000534203
ENSG00000033030.9	ZCCHC8	-0.178469	0.000536708
ENSG00000170629.10	DPY19L2P2	-0.236901	0.00053702
ENSG00000003756.12	RBM5	0.129908	0.000537924
ENSG00000214367.3	HAUS3	-0.203841	0.000537924
ENSG00000057252.8	SOAT1	-0.197775	0.000537934
ENSG00000078237.4	C12orf5	0.219657	0.000538517
ENSG00000116406.14	EDEM3	-0.143977	0.000542405
ENSG00000131153.4	GINS2	-0.146743	0.000545403
ENSG00000130772.9	MED18	-0.242345	0.000546295
ENSG00000169018.5	FEM1B	-0.128646	0.000546295
ENSG00000214050.3	FBXO16	0.532699	0.0005477
ENSG00000185567.6	AHNAK2	0.372349	0.000548463
ENSG00000117616.13	C1orf63	0.144021	0.000549082
ENSG00000169727.8	GPS1	0.131464	0.000549289
ENSG00000112245.6	PTP4A1	0.159499	0.000557565
ENSG00000138385.11	SSB	-0.120808	0.000558658
ENSG00000166927.8	MS4A7	0.185218	0.00056076
ENSG00000123358.15	NR4A1	-0.684511	0.000560793
ENSG00000167004.8	PDIA3	-0.116338	0.000561036
ENSG00000138376.6	BARD1	-0.149126	0.000563713
ENSG00000120334.11	CENPL	-0.199918	0.00056453
ENSG00000103319.7	EEF2K	0.117419	0.000565052
ENSG00000221983.3	UBA52	0.127954	0.00056551
ENSG00000260910.1	LINC00565	-0.5166	0.00056551
ENSG00000205664.6	RP11-706O15.1	0.208695	0.000571086
ENSG00000136997.10	MYC	0.118805	0.00057143
ENSG00000146535.9	GNA12	0.137341	0.000571649
ENSG00000198056.9	PRIM1	-0.183533	0.000571649
ENSG00000100263.9	RHBDD3	-0.224466	0.000576376
ENSG00000064607.12	SUGP2	0.104696	0.000578635
ENSG00000198554.7	WDHD1	-0.151848	0.000582603
ENSG00000079739.11	PGM1	-0.266704	0.000582881
ENSG00000139318.7	DUSP6	0.192572	0.000585708
ENSG00000139350.7	NEDD1	-0.240125	0.000587829
ENSG00000235408.2	SNORA71B	-0.55074	0.000590498
ENSG00000181938.9	GINS3	-0.195922	0.000592719
ENSG00000105220.10	GPI	0.13666	0.000597283
ENSG00000140968.6	IRF8	0.108225	0.000597405
ENSG00000110011.9	DNAJC4	0.245779	0.000597405
ENSG00000233762.2	AC007969.5	-0.595863	0.00060683
ENSG00000213240.7	NOTCH2NL	0.186392	0.000615469
ENSG00000268852.1	AC132872.2	-0.468756	0.000621482
ENSG00000072062.9	PRKACA	0.167687	0.00062366
ENSG00000132436.7	FIGNL1	-0.185443	0.000624034
ENSG00000261373.1	VPS9D1-AS1	0.205796	0.000628137
ENSG00000160305.13	DIP2A	0.146304	0.000631085
ENSG00000166801.11	FAM111A	-0.134675	0.000633586
ENSG00000110697.8	PITPNM1	0.179278	0.000633586
ENSG00000154839.5	SKA1	-0.201516	0.000633586
ENSG00000049246.10	PER3	0.316406	0.000634419
ENSG00000058091.12	CDK14	-0.336679	0.000637772
ENSG00000116852.10	KIF21B	-0.177193	0.00063934
ENSG00000100242.11	SUN2	0.144781	0.000642938
ENSG00000196422.6	PPP1R26	-0.27517	0.000645985
ENSG00000273226.1	RP11-513M16.8	-0.558332	0.000659199
ENSG00000111696.7	NT5DC3	-0.181349	0.000663568
ENSG00000083312.13	TNPO1	-0.136622	0.000665004
ENSG00000168028.9	RPSA	0.104254	0.000671902
ENSG00000090971.4	NAT14	-0.229399	0.000671902
ENSG00000166275.11	C10orf32	-0.283948	0.000671902
ENSG00000163013.7	FBXO41	0.145612	0.000673673
ENSG00000204264.4	PSMB8	-0.15155	0.000675828
ENSG00000080824.14	HSP90AA1	-0.124273	0.000682354
ENSG00000008869.7	HEATR5B	0.136382	0.000684509
ENSG00000250138.3	RP11-848G14.5	0.51281	0.000688139
ENSG00000147206.12	NXF3	0.150668	0.000688863
ENSG00000182054.5	IDH2	0.115764	0.000688863
ENSG00000165732.8	DDX21	-0.1326	0.000688863
ENSG00000213799.6	ZNF845	-0.243574	0.000699635
ENSG00000173581.3	CCDC106	0.20774	0.000705593
ENSG00000134508.8	CABLES1	-0.183169	0.000705593
ENSG00000138768.10	USO1	-0.145904	0.000711625
ENSG00000198856.8	OSTC	-0.166044	0.000712792
ENSG00000135363.7	LMO2	0.119672	0.000712792
ENSG00000164535.10	DAGLB	0.133654	0.000712792
ENSG00000149577.11	SIDT2	0.171261	0.000719025
ENSG00000196937.6	FAM3C	-0.243695	0.000723017
ENSG00000120053.9	GOT1	-0.284679	0.000723063
ENSG00000221890.2	NPTXR	-0.479172	0.000732181
ENSG00000004534.10	RBM6	0.116083	0.000740535
ENSG00000129933.16	MAU2	0.128198	0.000742162
ENSG00000225630.1	MTND2P28	0.362962	0.000744004
ENSG00000161642.13	ZNF385A	0.179128	0.000747164
ENSG00000086102.14	NFX1	0.117207	0.000748495
ENSG00000164308.12	ERAP2	-0.28088	0.0007513
ENSG00000124789.7	NUP153	-0.115207	0.000752497
ENSG00000168538.11	TRAPPC11	0.146508	0.00075792
ENSG00000100364.14	KIAA0930	0.11572	0.000759546
ENSG00000074855.6	ANO8	0.227816	0.000768263
ENSG00000213047.7	DENND1B	0.172086	0.000769167
ENSG00000214253.4	FIS1	0.148758	0.000775222
ENSG00000035141.3	FAM136A	-0.172221	0.000789803
ENSG00000167207.7	NOD2	0.206252	0.000794934
ENSG00000014138.4	POLA2	-0.141166	0.000803999
ENSG00000147475.10	ERLIN2	0.132476	0.000807795
ENSG00000131558.10	EXOC4	0.121054	0.000816429
ENSG00000147443.8	DOK2	0.164065	0.000816429
ENSG00000140044.8	JDP2	-0.341496	0.000817527
ENSG00000137563.7	GGH	-0.200127	0.000817865
ENSG00000226084.4	RP4-706A16.3	-0.503294	0.000826107
ENSG00000073150.9	PANX2	-0.429335	0.000831391
ENSG00000133812.10	SBF2	0.202399	0.000833915
ENSG00000137955.11	RABGGTB	0.18247	0.000833915
ENSG00000196378.7	ZNF34	0.263701	0.000834038
ENSG00000213956.4	RP11-269M20.1	0.288871	0.000849873
ENSG00000085185.11	BCORL1	-0.25722	0.000853252
ENSG00000136824.14	SMC2	-0.125702	0.000856379
ENSG00000176422.10	SPRYD4	-0.237301	0.000856379
ENSG00000269667.1	RP11-542M13.2	-0.233038	0.000856379
ENSG00000198668.6	CALM1	0.136381	0.000856752
ENSG00000110660.10	SLC35F2	-0.29229	0.000857089
ENSG00000103540.12	CCP110	-0.118516	0.000865223
ENSG00000160602.9	NEK8	-0.538609	0.000865701
ENSG00000258289.3	CHURC1	-0.158136	0.00087024
ENSG00000169733.7	RFNG	0.293306	0.000871021
ENSG00000238057.4	ZEB2-AS1	0.237187	0.000873902
ENSG00000105968.14	H2AFV	-0.114117	0.000880278
ENSG00000160703.11	NLRX1	-0.198312	0.000880287
ENSG00000108448.16	TRIM16L	-0.25604	0.000884452
ENSG00000006114.11	SYNRG	0.14642	0.00088665
ENSG00000119411.10	BSPRY	-1.02265	0.000893094
ENSG00000101412.9	E2F1	-0.151835	0.000893377
ENSG00000173218.10	VANGL1	-0.203283	0.000895626
ENSG00000103275.14	UBE2I	0.130876	0.000895626
ENSG00000204650.9	CRHR1-IT1	-0.480577	0.000901993
ENSG00000104946.6	TBC1D17	0.223362	0.000902635
ENSG00000235865.2	GSN-AS1	0.393829	0.000902635
ENSG00000157399.10	ARSE	0.566203	0.000904885
ENSG00000198420.5	FAM115A	-0.36924	0.000907772
ENSG00000175711.4	B3GNTL1	0.16382	0.000909453
ENSG00000143624.9	INTS3	0.124573	0.00091014
ENSG00000271605.1	MILR1	0.284799	0.00091014
ENSG00000185480.7	PARPBP	-0.168015	0.000913413
ENSG00000147697.4	GSDMC	0.651171	0.00092462
ENSG00000143119.8	CD53	0.146398	0.000926633
ENSG00000183020.9	AP2A2	0.145097	0.000927185
ENSG00000198300.8	PEG3	0.360209	0.000927185
ENSG00000153885.10	KCTD15	-0.147228	0.000927389
ENSG00000160298.13	C21orf58	-0.161863	0.000936399
ENSG00000165417.7	GTF2A1	-0.1238	0.000938376
ENSG00000117868.11	ESYT2	-0.0965192	0.000943904
ENSG00000108405.3	P2RX1	0.147497	0.000944187
ENSG00000158106.8	RHPN1	0.238599	0.000948619
ENSG00000186314.7	PRELID2	-0.313308	0.000957988
ENSG00000272142.1	RP11-428J1.5	0.3467	0.000960759
ENSG00000160014.12	CALM3	0.11986	0.000962801
ENSG00000149636.11	DSN1	-0.173182	0.000966067
ENSG00000163348.3	PYGO2	-0.144059	0.000967155
ENSG00000109686.12	SH3D19	-0.843537	0.000969736
ENSG00000123989.9	CHPF	-0.17737	0.000971325
ENSG00000187778.9	MCRS1	0.122129	0.000972555
ENSG00000160219.7	GAB3	0.176106	0.000972555
ENSG00000261597.1	RP11-353B9.1	0.494017	0.000972555
ENSG00000243646.4	IL10RB	0.177728	0.000978213
ENSG00000106772.13	PRUNE2	0.484589	0.000982048
ENSG00000124151.14	NCOA3	0.146983	0.000982532
ENSG00000205208.4	C4orf46	-0.189644	0.000986094
ENSG00000128604.14	IRF5	0.147004	0.00099522
ENSG00000119522.11	DENND1A	0.135764	0.000997143
ENSG00000145331.9	TRMT10A	-0.255001	0.00100317
ENSG00000105726.12	ATP13A1	0.124632	0.00100552
ENSG00000117528.7	ABCD3	-0.166348	0.00100552
ENSG00000084092.6	NOA1	-0.15758	0.0010061
ENSG00000124496.8	TRERF1	-0.129654	0.00101026
ENSG00000007237.14	GAS7	0.313308	0.00101338
ENSG00000198890.6	PRMT6	-0.17151	0.00101768
ENSG00000177602.4	GSG2	-0.188332	0.00101879
ENSG00000172270.14	BSG	0.117853	0.001021
ENSG00000099284.9	H2AFY2	-0.261851	0.00102298
ENSG00000268849.1	SIGLEC22P	0.211944	0.00102387
ENSG00000145779.7	TNFAIP8	-0.244318	0.0010247
ENSG00000137876.5	RSL24D1	-0.166541	0.00103342
ENSG00000177600.4	RPLP2	0.13376	0.00103464
ENSG00000173198.4	CYSLTR1	0.21898	0.0010348
ENSG00000105849.5	TWISTNB	-0.174629	0.00103835
ENSG00000247982.2	LINC00926	0.152246	0.00103835
ENSG00000123901.4	GPR83	-0.48668	0.00103918
ENSG00000268686.1	AC010524.2	0.460146	0.00103918
ENSG00000230629.2	RPS23P8	0.354162	0.00104605
ENSG00000235750.5	KIAA0040	-0.638657	0.00104936
ENSG00000137486.12	ARRB1	0.115779	0.00105096
ENSG00000103222.14	ABCC1	0.131608	0.00105389
ENSG00000241973.6	PI4KA	0.123488	0.00106759
ENSG00000060971.13	ACAA1	0.161422	0.00106896
ENSG00000116985.6	BMP8B	-0.203768	0.00106942
ENSG00000188856.6	RPSAP47	0.300809	0.00107306
ENSG00000125347.9	IRF1	0.165334	0.0010783
ENSG00000198663.12	C6orf89	0.123407	0.00108154
ENSG00000177200.11	CHD9	0.118372	0.00108233
ENSG00000089916.13	GPATCH2L	0.11541	0.00108368
ENSG00000160194.13	NDUFV3	0.120759	0.00108704
ENSG00000120280.5	CXorf21	-0.127972	0.00109125
ENSG00000205246.4	RPSAP58	0.267627	0.00111479
ENSG00000135045.6	C9orf40	-0.163368	0.00111832
ENSG00000179331.2	RAB39A	-0.36749	0.00111832
ENSG00000187456.9	RDM1	-0.872091	0.00113145
ENSG00000128228.4	SDF2L1	-0.206035	0.00113145
ENSG00000144320.9	KIAA1715	-0.16241	0.00113245
ENSG00000104894.7	CD37	0.146921	0.00113389
ENSG00000155792.5	DEPTOR	0.249996	0.00114057
ENSG00000122778.5	KIAA1549	-0.882511	0.00115475
ENSG00000119314.11	PTBP3	0.119754	0.00115491
ENSG00000084110.6	HAL	-0.193965	0.00115515
ENSG00000169252.4	ADRB2	0.212311	0.00115538
ENSG00000150760.8	DOCK1	0.849755	0.00115888
ENSG00000169715.10	MT1E	0.155855	0.00115981
ENSG00000100813.10	ACIN1	0.10849	0.00116873
ENSG00000172349.12	IL16	0.199412	0.00116919
ENSG00000010361.9	FUZ	-0.254713	0.00117047
ENSG00000090372.10	STRN4	0.149376	0.0011736
ENSG00000162585.12	C1orf86	0.213751	0.00117673
ENSG00000244716.2	RP11-20O24.4	-0.47182	0.00119665
ENSG00000187994.9	RINL	-0.205873	0.00119786
ENSG00000106123.7	EPHB6	0.21186	0.00120013
ENSG00000144401.10	METTL21A	-0.164334	0.00120188
ENSG00000027001.7	MIPEP	-0.213635	0.00120553
ENSG00000234771.2	RP11-395P17.3	0.282333	0.00120876
ENSG00000271430.1	RP3-368A4.5	0.270069	0.0012092
ENSG00000166508.13	MCM7	-0.123313	0.00121193
ENSG00000142534.2	RPS11	0.156584	0.0012128
ENSG00000171115.3	GIMAP8	0.285839	0.00124349
ENSG00000034063.9	UHRF1	-0.110185	0.00124969
ENSG00000166938.8	DIS3L	-0.130387	0.00125198
ENSG00000121210.11	KIAA0922	0.123102	0.00126495
ENSG00000142765.13	SYTL1	-0.208951	0.00127564
ENSG00000137574.6	TGS1	-0.138689	0.00129937
ENSG00000134627.7	PIWIL4	0.129841	0.00130198
ENSG00000166341.6	DCHS1	0.41446	0.00130374
ENSG00000167645.12	YIF1B	0.167522	0.00130438
ENSG00000024526.12	DEPDC1	-0.185849	0.00130963
ENSG00000164068.11	RNF123	0.136875	0.00130963
ENSG00000181788.3	SIAH2	-0.18198	0.00131021
ENSG00000068885.10	IFT80	-0.250345	0.00131061
ENSG00000124529.3	HIST1H4B	-0.153728	0.00131061
ENSG00000058804.10	NDC1	-0.138296	0.00131347
ENSG00000108861.4	DUSP3	0.119273	0.00131805
ENSG00000086289.7	EPDR1	-0.202762	0.00135129
ENSG00000152082.9	MZT2B	0.183187	0.00135129
ENSG00000120899.13	PTK2B	0.110496	0.00135237
ENSG00000147536.7	GINS4	-0.177293	0.00135237
ENSG00000103196.7	CRISPLD2	0.623979	0.00136011
ENSG00000127616.13	SMARCA4	0.130849	0.00136011
ENSG00000177663.9	IL17RA	-0.113058	0.0013668
ENSG00000149177.8	PTPRJ	0.132947	0.00136769
ENSG00000137073.16	UBAP2	0.11428	0.00137376
ENSG00000006638.7	TBXA2R	-0.768844	0.00137539
ENSG00000171617.9	ENC1	0.316339	0.00137539
ENSG00000212978.5	AC016747.3	0.265133	0.0013758
ENSG00000180233.9	ZNRF2	0.149904	0.00137709
ENSG00000140284.6	SLC27A2	-0.392638	0.00137993
ENSG00000105483.12	CARD8	0.0978083	0.00138258
ENSG00000180694.9	TMEM64	-0.293605	0.00138304
ENSG00000138834.8	MAPK8IP3	0.179182	0.00138304
ENSG00000185905.3	C16orf54	0.14102	0.00138304
ENSG00000213445.4	SIPA1	0.150718	0.00139463
ENSG00000109906.9	ZBTB16	-0.283527	0.00139995
ENSG00000167553.10	TUBA1C	-0.142294	0.00140313
ENSG00000138764.9	CCNG2	0.238934	0.00140494
ENSG00000189043.5	NDUFA4	0.163329	0.00140533
ENSG00000096996.11	IL12RB1	0.195966	0.00140567
ENSG00000113048.12	MRPS27	-0.116865	0.00141371
ENSG00000011523.9	CEP68	0.149245	0.00141371
ENSG00000145569.5	FAM105A	0.18104	0.00142141
ENSG00000178035.7	IMPDH2	0.111728	0.00145549
ENSG00000187653.10	TMSB4XP8	0.307848	0.00146548
ENSG00000169100.8	SLC25A6	-0.132945	0.00146833
ENSG00000105655.14	ISYNA1	-0.394483	0.00148118
ENSG00000068305.13	MEF2A	-0.16583	0.0014841
ENSG00000165730.10	STOX1	-0.655772	0.0014841
ENSG00000117148.6	ACTL8	0.902777	0.00150127
ENSG00000147894.10	C9orf72	0.160422	0.00150607
ENSG00000100142.10	POLR2F	0.189056	0.00150648
ENSG00000122515.10	ZMIZ2	0.160544	0.00151161
ENSG00000234742.1	AC144530.1	-0.628579	0.00152676
ENSG00000152518.5	ZFP36L2	0.105541	0.00153585
ENSG00000184381.14	PLA2G6	0.228185	0.00154563
ENSG00000092036.12	HAUS4	-0.178403	0.00154563
ENSG00000129667.8	RHBDF2	0.20577	0.00155085
ENSG00000089177.13	KIF16B	-0.23791	0.00155195
ENSG00000177000.6	MTHFR	0.16043	0.00155374
ENSG00000128791.7	TWSG1	-0.219385	0.00155485
ENSG00000146476.6	C6orf211	-0.227314	0.00155494
ENSG00000137161.12	CNPY3	0.120552	0.00156489
ENSG00000164930.7	FZD6	-0.356111	0.0015746
ENSG00000184319.11	AC002055.4	0.318115	0.00157778
ENSG00000123219.8	CENPK	-0.172904	0.00160782
ENSG00000136710.5	CCDC115	0.179291	0.00162166
ENSG00000173575.14	CHD2	0.106108	0.00162815
ENSG00000158864.8	NDUFS2	0.121941	0.00163336
ENSG00000166595.7	FAM96B	0.174603	0.00163336
ENSG00000196152.6	ZNF79	0.224182	0.00164025
ENSG00000202058.1	RN7SKP80	0.230778	0.00164406
ENSG00000176834.9	VSIG10	-0.302213	0.00166113
ENSG00000137411.12	VARS2	-0.178366	0.00166113
ENSG00000007047.10	MARK4	0.160935	0.00167493
ENSG00000103253.13	HAGHL	0.168946	0.00170049
ENSG00000137409.14	MTCH1	0.120254	0.00170261
ENSG00000112290.8	WASF1	-0.283058	0.00170288
ENSG00000141232.4	TOB1	0.207931	0.00171881
ENSG00000168894.5	RNF181	0.165412	0.00172205
ENSG00000104325.2	DECR1	0.142198	0.00173242
ENSG00000118263.10	KLF7	0.215107	0.0017445
ENSG00000132003.5	ZSWIM4	0.195842	0.00175547
ENSG00000075826.12	SEC31B	0.26618	0.0017586
ENSG00000139514.8	SLC7A1	-0.111564	0.00178717
ENSG00000065615.9	CYB5R4	0.185817	0.00179446
ENSG00000154930.10	ACSS1	-0.312593	0.00180045
ENSG00000171867.12	PRNP	-0.274624	0.00181567
ENSG00000154134.10	ROBO3	-0.368353	0.00182526
ENSG00000167380.12	ZNF226	0.165832	0.00182526
ENSG00000207133.1	SNORD116-7	0.413387	0.00182526
ENSG00000169554.12	ZEB2	0.0995996	0.00182862
ENSG00000151062.10	CACNA2D4	0.127917	0.00182883
ENSG00000215417.6	MIR17HG	-0.189922	0.00185029
ENSG00000118181.6	RPS25	0.124339	0.00185284
ENSG00000116830.7	TTF2	-0.106345	0.00187499
ENSG00000168411.9	RFWD3	-0.115616	0.00187655
ENSG00000112149.5	CD83	-0.289396	0.00187744
ENSG00000227097.4	RP11-742N3.1	0.316497	0.00187744
ENSG00000179639.6	FCER1A	0.544827	0.00187744
ENSG00000177917.6	ARL6IP6	-0.191718	0.00190285
ENSG00000022567.5	SLC45A4	0.129242	0.00190549
ENSG00000118855.14	MFSD1	0.143617	0.00190824
ENSG00000101096.15	NFATC2	0.159662	0.00191545
ENSG00000160695.10	VPS11	0.159703	0.00191545
ENSG00000144895.7	EIF2A	-0.154157	0.00191545
ENSG00000156345.13	CDK20	0.229498	0.00191671
ENSG00000143727.11	ACP1	-0.150913	0.00191671
ENSG00000129003.11	VPS13C	0.119795	0.00195985
ENSG00000167074.10	TEF	0.246739	0.00198197
ENSG00000141576.10	RNF157	-0.408729	0.00198437
ENSG00000186174.8	BCL9L	0.186674	0.00198884
ENSG00000060656.15	PTPRU	-0.492944	0.0019889
ENSG00000126822.11	PLEKHG3	0.165886	0.00199451
ENSG00000177303.5	CASKIN2	-0.570715	0.00199875
ENSG00000187954.8	CYHR1	0.141552	0.00203354
ENSG00000254521.2	SIGLEC12	0.155135	0.00204354
ENSG00000182676.4	PPP1R27	0.125821	0.00204364
ENSG00000075651.11	PLD1	0.187304	0.00204438
ENSG00000173153.9	ESRRA	-0.150761	0.00204576
ENSG00000126953.5	TIMM8A	-0.182025	0.00204585
ENSG00000198482.6	ZNF808	-0.167089	0.00205413
ENSG00000140511.7	HAPLN3	-0.584251	0.00205471
ENSG00000162836.7	ACP6	-0.670333	0.00205823
ENSG00000074966.6	TXK	0.336769	0.00207847
ENSG00000139737.17	SLAIN1	-1.09026	0.00208396
ENSG00000213699.4	SLC35F6	0.151127	0.00209917
ENSG00000182504.6	CEP97	-0.167332	0.00210579
ENSG00000111843.9	TMEM14C	0.158649	0.00210681
ENSG00000106809.6	OGN	-0.272175	0.00212653
ENSG00000067798.9	NAV3	-0.129463	0.00213192
ENSG00000170871.7	KIAA0232	-0.125732	0.0021437
ENSG00000172469.10	MANEA	-0.190543	0.0021453
ENSG00000204310.6	AGPAT1	0.174948	0.0021582
ENSG00000162909.13	CAPN2	0.113017	0.00215893
ENSG00000096063.10	SRPK1	-0.107789	0.00218526
ENSG00000182185.14	RAD51B	-0.310237	0.00218844
ENSG00000178425.9	NT5DC1	-0.276829	0.00218871
ENSG00000100290.2	BIK	0.243758	0.00218936
ENSG00000000460.12	C1orf112	-0.156753	0.00220034
ENSG00000008294.16	SPAG9	0.116675	0.00220636
ENSG00000146776.10	ATXN7L1	0.163591	0.00221392
ENSG00000160991.11	ORAI2	0.146002	0.00222208
ENSG00000071894.10	CPSF1	0.138379	0.00222208
ENSG00000100320.18	RBFOX2	-0.367585	0.00222698
ENSG00000228146.2	CASP16	0.505202	0.00223945
ENSG00000224861.1	YBX1P1	0.37004	0.00225524
ENSG00000237424.1	FOXD2-AS1	-0.259447	0.00225728
ENSG00000104765.10	BNIP3L	0.173387	0.00226686
ENSG00000144485.6	HES6	0.161037	0.00227366
ENSG00000156482.6	RPL30	0.143116	0.00227473
ENSG00000125885.9	MCM8	-0.126838	0.00230888
ENSG00000243302.3	RP11-274B21.2	0.197687	0.00232215
ENSG00000129534.9	MIS18BP1	-0.113174	0.00232522
ENSG00000167977.4	KCTD5	0.138907	0.00234023
ENSG00000213015.4	ZNF580	0.212009	0.00234132
ENSG00000063601.12	MTMR1	-0.241349	0.00235675
ENSG00000116793.11	PHTF1	-0.187319	0.0023601
ENSG00000151465.9	CDC123	0.144697	0.00236089
ENSG00000099998.13	GGT5	0.316344	0.00236242
ENSG00000167103.7	PIP5KL1	0.417994	0.00237418
ENSG00000139370.6	SLC15A4	0.166393	0.00238383
ENSG00000039650.5	PNKP	0.157851	0.00240501
ENSG00000171603.12	CLSTN1	0.121725	0.00240771
ENSG00000188243.8	COMMD6	0.197302	0.00240852
ENSG00000222501.1	RNU4-25P	0.456178	0.00240901
ENSG00000188816.3	HMX2	0.156041	0.00241208
ENSG00000173083.10	HPSE	-0.325758	0.00241646
ENSG00000185950.7	IRS2	-0.239018	0.00242491
ENSG00000158201.5	ABHD3	-0.171391	0.00242788
ENSG00000154845.11	PPP4R1	-0.155434	0.00242983
ENSG00000177989.9	ODF3B	0.246893	0.00243395
ENSG00000177700.5	POLR2L	0.187974	0.00245268
ENSG00000001167.10	NFYA	0.116993	0.00246262
ENSG00000125107.12	CNOT1	0.0917258	0.0024648
ENSG00000099250.13	NRP1	0.241819	0.0024648
ENSG00000165304.3	MELK	-0.150532	0.0024648
ENSG00000166159.6	LRTM2	0.397961	0.0024648
ENSG00000254087.3	LYN	0.116576	0.0024648
ENSG00000121807.5	CCR2	0.133847	0.0024743
ENSG00000111371.11	SLC38A1	-0.156171	0.00248021
ENSG00000235174.1	RPL39P3	-0.388487	0.00248188
ENSG00000197321.10	SVIL	0.178087	0.00248908
ENSG00000083845.4	RPS5	0.120984	0.00249299
ENSG00000141696.8	LEPREL4	-0.419237	0.00249299
ENSG00000142185.12	TRPM2	0.123161	0.00249299
ENSG00000260023.1	RP11-49C24.1	-0.506771	0.00250751
ENSG00000080839.7	RBL1	-0.116384	0.00250797
ENSG00000177105.9	RHOG	0.139717	0.00250797
ENSG00000198382.4	UVRAG	0.115428	0.00250797
ENSG00000150337.9	FCGR1A	-0.173966	0.00250797
ENSG00000198815.4	FOXJ3	0.110443	0.00250797
ENSG00000123405.9	NFE2	-0.261113	0.00251123
ENSG00000168564.5	CDKN2AIP	-0.154767	0.00251583
ENSG00000177732.6	SOX12	-0.155054	0.00252759
ENSG00000112308.8	C6orf62	-0.125076	0.00252759
ENSG00000178409.9	BEND3	-0.25976	0.00254245
ENSG00000076242.10	MLH1	-0.125582	0.00254679
ENSG00000100092.16	SH3BP1	0.150367	0.00255038
ENSG00000171509.11	RXFP1	0.195374	0.00255827
ENSG00000119777.14	TMEM214	-0.118915	0.00257432
ENSG00000144647.5	POMGNT2	-0.31364	0.0025776
ENSG00000140464.15	PML	0.143937	0.0025783
ENSG00000198938.2	MT-CO3	0.161499	0.00257923
ENSG00000010295.15	IFFO1	0.180067	0.00257923
ENSG00000168615.7	ADAM9	-0.164212	0.00258048
ENSG00000185100.6	ADSSL1	0.298914	0.0026015
ENSG00000123685.4	BATF3	-0.551055	0.00262775
ENSG00000137628.12	DDX60	-0.995541	0.0026316
ENSG00000243244.1	STON1	-0.395656	0.0026396
ENSG00000179750.11	APOBEC3B	-0.225898	0.00269145
ENSG00000115425.9	PECR	-0.41586	0.00270892
ENSG00000167325.10	RRM1	-0.134608	0.00271026
ENSG00000160271.10	RALGDS	0.149122	0.00271447
ENSG00000229373.4	LINC00452	-1.00302	0.00271935
ENSG00000101544.4	ADNP2	-0.125624	0.00272774
ENSG00000133121.16	STARD13	0.311291	0.00274755
ENSG00000176208.4	ATAD5	-0.151767	0.00275044
ENSG00000108679.8	LGALS3BP	0.474682	0.00275702
ENSG00000103199.9	ZNF500	0.174263	0.00277523
ENSG00000169598.11	DFFB	-0.188138	0.00278996
ENSG00000119969.10	HELLS	-0.125796	0.00278996
ENSG00000183258.7	DDX41	0.141774	0.00281795
ENSG00000130699.12	TAF4	0.137279	0.00282292
ENSG00000012660.9	ELOVL5	-0.132971	0.00283588
ENSG00000153006.10	SREK1IP1	-0.193487	0.00285278
ENSG00000144224.12	UBXN4	-0.114279	0.00286604
ENSG00000101000.4	PROCR	-0.547269	0.00287901
ENSG00000135823.9	STX6	0.160572	0.00289712
ENSG00000178752.11	FAM132B	-0.395967	0.00293103
ENSG00000106628.6	POLD2	0.114006	0.00296399
ENSG00000100632.6	ERH	0.136831	0.00299566
ENSG00000148384.11	INPP5E	0.204473	0.00299566
ENSG00000213967.6	ZNF726	-0.333893	0.00299566
ENSG00000101342.5	TLDC2	0.327352	0.00299566
ENSG00000130270.12	ATP8B3	0.14323	0.00299724
ENSG00000143569.14	UBAP2L	0.115312	0.00300064
ENSG00000146416.12	AIG1	-0.621254	0.00301358
ENSG00000115935.12	WIPF1	0.114115	0.00301358
ENSG00000187189.9	TSPYL4	-0.257469	0.00301539
ENSG00000169756.12	LIMS1	-0.16219	0.00303671
ENSG00000112799.4	LY86	0.196828	0.00304881
ENSG00000162430.12	SEPN1	-0.140163	0.00305024
ENSG00000196150.9	ZNF250	0.163852	0.003056
ENSG00000072210.14	ALDH3A2	0.159531	0.00308687
ENSG00000128881.12	TTBK2	0.119923	0.00310243
ENSG00000179091.4	CYC1	0.131437	0.00311585
ENSG00000140474.8	ULK3	0.131082	0.00311585
ENSG00000166619.8	BLCAP	0.144962	0.00311585
ENSG00000119397.12	CNTRL	0.0899348	0.00312026
ENSG00000203589.2	RP5-886K2.1	-1.08007	0.00312026
ENSG00000222755.1	RN7SKP206	-0.510587	0.00312322
ENSG00000100934.10	SEC23A	-0.17764	0.00312337
ENSG00000143515.12	ATP8B2	-0.698956	0.0031274
ENSG00000169203.12	RP11-231C14.4	0.319863	0.00312932
ENSG00000184575.7	XPOT	-0.119316	0.00313326
ENSG00000110880.6	CORO1C	0.134251	0.00313746
ENSG00000167670.11	CHAF1A	-0.130003	0.00314508
ENSG00000173208.3	ABCD2	0.234338	0.00314663
ENSG00000012822.11	CALCOCO1	0.178902	0.00315838
ENSG00000244300.2	RP11-475N22.4	-0.7107	0.00315838
ENSG00000172831.7	CES2	0.117346	0.00316987
ENSG00000263499.1	RP11-118E18.4	0.70361	0.00317686
ENSG00000109390.7	NDUFC1	0.169846	0.00317686
ENSG00000173915.8	USMG5	0.149089	0.00320759
ENSG00000270084.1	GAS5-AS1	-0.340259	0.00321638
ENSG00000085224.16	ATRX	0.1279	0.00324309
ENSG00000213619.5	NDUFS3	0.125928	0.00324696
ENSG00000111530.8	CAND1	-0.107198	0.00326345
ENSG00000105640.8	RPL18A	0.142391	0.00327682
ENSG00000112039.3	FANCE	-0.169095	0.00328695
ENSG00000168899.4	VAMP5	0.378065	0.00328733
ENSG00000150457.7	LATS2	-0.188453	0.00328733
ENSG00000102221.9	PHF16	-0.192776	0.00331351
ENSG00000186638.11	KIF24	-0.149085	0.00331568
ENSG00000204388.5	HSPA1B	-0.211867	0.00332606
ENSG00000033327.8	GAB2	0.133365	0.00332901
ENSG00000073536.13	NLE1	-0.13067	0.00333546
ENSG00000156587.11	UBE2L6	-0.399516	0.00336734
ENSG00000213740.2	SERBP1P1	-0.590754	0.00336734
ENSG00000230055.2	CISD3	0.188206	0.00337524
ENSG00000136367.12	ZFHX2	0.264817	0.00338143
ENSG00000133119.8	RFC3	-0.154223	0.0033917
ENSG00000163872.11	YEATS2	0.11775	0.00339224
ENSG00000106261.12	ZKSCAN1	0.102758	0.00340406
ENSG00000133030.15	MPRIP	0.120784	0.00340714
ENSG00000143486.11	EIF2D	-0.137744	0.00342871
ENSG00000167680.11	SEMA6B	-0.241897	0.00343082
ENSG00000159618.11	GPR114	0.116282	0.00344726
ENSG00000152213.3	ARL11	0.170089	0.00350072
ENSG00000131374.10	TBC1D5	0.101036	0.00350095
ENSG00000160161.5	CILP2	-0.612525	0.00350169
ENSG00000074755.10	ZZEF1	0.0969618	0.00352317
ENSG00000150459.8	SAP18	0.125644	0.00353017
ENSG00000130775.11	THEMIS2	0.210422	0.00353246
ENSG00000183255.7	PTTG1IP	0.1047	0.00353246
ENSG00000116396.9	KCNC4	-0.234525	0.00353527
ENSG00000089820.11	ARHGAP4	0.142078	0.00354106
ENSG00000178950.12	GAK	0.113802	0.00356742
ENSG00000089050.10	RBBP9	-0.241715	0.00356742
ENSG00000130340.10	SNX9	-0.369504	0.00356742
ENSG00000144355.10	DLX1	-0.162419	0.00357037
ENSG00000126391.9	FRMD8	0.147366	0.00357723
ENSG00000254952.1	AP001257.1	0.911282	0.00357995
ENSG00000113916.13	BCL6	0.599335	0.00360884
ENSG00000109016.13	DHRS7B	-0.182283	0.00361941
ENSG00000157600.7	TMEM164	0.112226	0.0036348
ENSG00000138028.10	CGREF1	0.130657	0.00366351
ENSG00000173064.6	HECTD4	0.114408	0.00366597
ENSG00000105258.4	POLR2I	0.195977	0.00371392
ENSG00000240857.1	RDH14	-0.278615	0.0037256
ENSG00000127415.8	IDUA	0.241665	0.00373266
ENSG00000161217.7	PCYT1A	0.131229	0.00373266
ENSG00000188191.10	PRKAR1B	0.213065	0.00375074
ENSG00000128708.8	HAT1	-0.142107	0.00378827
ENSG00000112312.5	GMNN	-0.161719	0.00378827
ENSG00000214026.6	MRPL23	0.155288	0.00378954
ENSG00000099308.6	MAST3	0.136918	0.00379114
ENSG00000160410.10	SHKBP1	0.125785	0.0038218
ENSG00000187730.6	GABRD	-0.794256	0.00383064
ENSG00000173281.4	PPP1R3B	-0.565725	0.00383765
ENSG00000114316.8	USP4	0.0975662	0.00385061
ENSG00000161981.6	SNRNP25	0.122637	0.00385061
ENSG00000213523.5	SRA1	0.146563	0.00386882
ENSG00000253276.1	CCDC71L	-0.487244	0.00388877
ENSG00000122566.16	HNRNPA2B1	-0.0817444	0.00391311
ENSG00000135473.10	PAN2	0.14021	0.00391311
ENSG00000187741.10	FANCA	-0.128084	0.0039254
ENSG00000197620.6	CXorf40A	0.208938	0.0039254
ENSG00000127084.13	FGD3	0.146713	0.0039305
ENSG00000105373.14	GLTSCR2	-0.117469	0.0039305
ENSG00000197714.4	ZNF460	-0.111532	0.0039305
ENSG00000171794.3	UTF1	0.276429	0.00393934
ENSG00000198039.7	ZNF273	-0.193073	0.00394845
ENSG00000197872.7	FAM49A	0.194151	0.00394845
ENSG00000150779.7	TIMM8B	0.157743	0.00394845
ENSG00000149054.10	ZNF215	-1.01205	0.00394845
ENSG00000149091.11	DGKZ	0.121604	0.00394958
ENSG00000133026.8	MYH10	-0.273028	0.00394987
ENSG00000238172.1	RPS2P35	-0.417202	0.00395187
ENSG00000099860.4	GADD45B	0.191167	0.00395366
ENSG00000163412.8	EIF4E3	-0.976959	0.00395947
ENSG00000168591.11	TMUB2	0.151148	0.00395947
ENSG00000108439.5	PNPO	0.161179	0.00397124
ENSG00000207445.1	SNORD15B	-0.359224	0.00397883
ENSG00000196083.5	IL1RAP	-0.110786	0.00398927
ENSG00000117020.12	AKT3	0.184105	0.00399016
ENSG00000108671.5	PSMD11	-0.117973	0.0040099
ENSG00000196466.6	ZNF799	-0.251331	0.00401583
ENSG00000130812.6	ANGPTL6	0.757011	0.00401656
ENSG00000204394.8	VARS	0.118175	0.00402419
ENSG00000108175.12	ZMIZ1	0.108031	0.00404172
ENSG00000130005.7	GAMT	0.138869	0.00404172
ENSG00000122861.11	PLAU	0.14128	0.00404172
ENSG00000180773.10	SLC36A4	-0.16224	0.00404388
ENSG00000122042.9	UBL3	0.184279	0.00409119
ENSG00000187796.9	CARD9	0.159194	0.00410886
ENSG00000130649.5	CYP2E1	0.381589	0.00410964
ENSG00000160193.7	WDR4	-0.161773	0.00411174
ENSG00000168769.8	TET2	0.118223	0.00411174
ENSG00000105865.6	DUS4L	-0.27065	0.00412699
ENSG00000166329.2	AC007431.1	0.573141	0.00413991
ENSG00000174500.8	GCSAM	-0.669054	0.00415973
ENSG00000099330.4	OCEL1	0.170163	0.00416629
ENSG00000183891.5	TTC32	-0.268591	0.00420621
ENSG00000160221.12	C21orf33	0.103545	0.00421207
ENSG00000174100.5	MRPL45	-0.128122	0.00421694
ENSG00000183019.3	C19orf59	-0.278488	0.00422467
ENSG00000169660.11	HEXDC	0.176034	0.00422949
ENSG00000149925.12	ALDOA	0.0953652	0.00423259
ENSG00000174227.11	PIGG	0.13021	0.00425188
ENSG00000131401.7	NAPSB	0.18136	0.00425844
ENSG00000170035.11	UBE2E3	-0.150418	0.00427718
ENSG00000233757.2	AC092835.2	-0.36429	0.00427718
ENSG00000148300.7	REXO4	-0.136698	0.00428392
ENSG00000187676.7	B3GALTL	-0.26945	0.00429507
ENSG00000132964.7	CDK8	-0.165477	0.00430711
ENSG00000135821.12	GLUL	0.09439	0.00430711
ENSG00000246985.3	SOCS2-AS1	-0.401848	0.00431414
ENSG00000135678.7	CPM	0.130983	0.00431783
ENSG00000160445.6	ZER1	0.146695	0.00431964
ENSG00000197766.3	CFD	0.124718	0.00433958
ENSG00000166340.10	TPP1	0.098514	0.00433958
ENSG00000100075.5	SLC25A1	0.120217	0.00434983
ENSG00000158457.4	TSPAN33	-0.490269	0.0043762
ENSG00000260249.2	RP11-401P9.5	0.431879	0.00439191
ENSG00000166133.13	RPUSD2	-0.187579	0.00442041
ENSG00000114999.7	TTL	-0.148816	0.00442411
ENSG00000265688.1	MAFG-AS1	-0.266802	0.00445465
ENSG00000091651.4	ORC6	-0.138243	0.00445784
ENSG00000236254.1	MTND4P14	0.611414	0.00447406
ENSG00000215252.7	GOLGA8B	-0.484453	0.00448511
ENSG00000142541.12	RPL13A	-0.116365	0.00448728
ENSG00000198242.9	RPL23A	0.132168	0.00449003
ENSG00000107821.10	KAZALD1	-0.307468	0.00449542
ENSG00000197461.9	PDGFA	-0.264042	0.00450749
ENSG00000100503.19	NIN	0.0884706	0.00450875
ENSG00000147601.9	TERF1	-0.145558	0.00452602
ENSG00000108798.4	ABI3	0.473833	0.00453579
ENSG00000260916.1	CCPG1	-0.166531	0.00454897
ENSG00000131187.5	F12	-0.718033	0.00455316
ENSG00000067182.3	TNFRSF1A	0.106244	0.00458097
ENSG00000166925.4	TSC22D4	0.119455	0.00458618
ENSG00000143374.10	TARS2	0.143244	0.0045873
ENSG00000257027.1	RP11-705C15.3	0.184834	0.00460219
ENSG00000168002.7	POLR2G	0.145621	0.00460736
ENSG00000236287.3	ZBED5	0.148461	0.00460736
ENSG00000254639.1	CTD-2589M5.5	-0.788763	0.0046422
ENSG00000123360.7	PDE1B	0.260908	0.0046422
ENSG00000187808.3	SOWAHD	0.229831	0.00464577
ENSG00000138709.13	LARP1B	-0.13599	0.00464822
ENSG00000142686.7	C1orf216	-0.170068	0.0046504
ENSG00000104408.5	EIF3E	-0.149782	0.00468325
ENSG00000174939.6	ASPHD1	-0.253841	0.00469656
ENSG00000186469.4	GNG2	0.516075	0.00469656
ENSG00000009335.13	UBE3C	-0.0924511	0.00470268
ENSG00000171155.7	C1GALT1C1	-0.180284	0.00470405
ENSG00000170684.4	ZNF296	0.21636	0.00470405
ENSG00000176788.7	BASP1	0.205207	0.00470405
ENSG00000099337.3	KCNK6	0.175841	0.00472506
ENSG00000114023.11	FAM162A	0.15773	0.00472855
ENSG00000075785.8	RAB7A	0.114306	0.00474856
ENSG00000267299.1	CTB-66B24.1	0.915825	0.00474856
ENSG00000197912.9	SPG7	0.131276	0.00474856
ENSG00000181396.8	OGFOD3	0.171287	0.00474856
ENSG00000130414.7	NDUFA10	0.102087	0.00475458
ENSG00000221926.7	TRIM16	-0.144784	0.00476988
ENSG00000153898.8	MCOLN2	0.253492	0.00477331
ENSG00000237757.1	EEF1A1P30	0.247742	0.00479949
ENSG00000197712.7	FAM114A1	-0.570278	0.00479957
ENSG00000057019.11	DCBLD2	-0.202628	0.0048216
ENSG00000159314.7	ARHGAP27	0.144061	0.00482696
ENSG00000064601.12	CTSA	0.1055	0.00490039
ENSG00000181789.10	COPG1	0.123251	0.00490196
ENSG00000182473.16	EXOC7	0.129004	0.0049214
ENSG00000188321.9	ZNF559	0.197333	0.0049214
ENSG00000117461.10	PIK3R3	0.18328	0.0049214
ENSG00000163297.12	ANTXR2	-0.138889	0.0049214
ENSG00000102218.5	RP2	-0.161601	0.00492958
ENSG00000130640.9	TUBGCP2	0.13218	0.00494558
ENSG00000107796.8	ACTA2	0.60123	0.00498872
ENSG00000121486.7	TRMT1L	-0.161842	0.00502077
ENSG00000144677.10	CTDSPL	-0.331912	0.00502826
ENSG00000143549.15	TPM3	0.0939795	0.00503067
ENSG00000205221.8	VIT	-0.454355	0.00503582
ENSG00000161277.9	THAP8	0.261724	0.00503667
ENSG00000156968.8	MPV17L	-0.154133	0.00504513
ENSG00000182768.7	NGRN	0.23567	0.00504513
ENSG00000198223.10	CSF2RA	0.164789	0.00504513
ENSG00000187522.9	HSPA14	-0.12316	0.00505049
ENSG00000017483.10	SLC38A5	-0.136187	0.00505784
ENSG00000095370.15	SH2D3C	0.167078	0.00506481
ENSG00000183486.8	MX2	-0.248825	0.00509529
ENSG00000185658.9	BRWD1	0.120055	0.00511988
ENSG00000095209.7	TMEM38B	-0.172819	0.0051337
ENSG00000108829.9	LRRC59	-0.106593	0.00514616
ENSG00000243055.1	GK-AS1	0.4111	0.00517381
ENSG00000177465.4	ACOT4	-0.454183	0.00522122
ENSG00000162607.8	USP1	-0.124687	0.00523626
ENSG00000232637.3	WI2-3658N16.1	0.289867	0.00525897
ENSG00000264242.2	RP11-271K11.1	0.821959	0.00525897
ENSG00000071051.9	NCK2	-0.134695	0.00525897
ENSG00000130713.11	EXOSC2	-0.118897	0.00526525
ENSG00000109861.11	CTSC	0.102384	0.00526525
ENSG00000180066.5	C10orf91	-0.491016	0.00528425
ENSG00000152439.8	ZNF773	0.199475	0.00531191
ENSG00000197170.5	PSMD12	-0.135356	0.00531191
ENSG00000090989.13	EXOC1	0.139763	0.00537079
ENSG00000163378.9	EOGT	-0.196398	0.00537535
ENSG00000065970.4	FOXJ2	-0.150821	0.00537535
ENSG00000104517.8	UBR5	0.0850184	0.00537535
ENSG00000132670.16	PTPRA	0.121095	0.00539459
ENSG00000069943.5	PIGB	0.147599	0.00539618
ENSG00000138777.15	PPA2	0.123485	0.00540961
ENSG00000149294.12	NCAM1	-0.276876	0.00541359
ENSG00000256546.1	AC156455.1	0.314822	0.00542779
ENSG00000107679.10	PLEKHA1	-0.443516	0.00544912
ENSG00000218891.2	ZNF579	0.166493	0.00545348
ENSG00000135119.10	RNFT2	-0.421965	0.00545412
ENSG00000160285.10	LSS	0.131726	0.00547272
ENSG00000101846.6	STS	0.184802	0.00547893
ENSG00000173818.12	ENDOV	0.163079	0.00547893
ENSG00000168944.11	CEP120	-0.146272	0.0054889
ENSG00000143614.7	GATAD2B	0.112228	0.00551587
ENSG00000096060.10	FKBP5	-0.104866	0.00551944
ENSG00000200312.1	RN7SKP255	0.444113	0.00551944
ENSG00000232112.3	TMA7	0.1999	0.0055225
ENSG00000213963.2	AC074286.1	0.281806	0.00552538
ENSG00000188559.9	RALGAPA2	0.106648	0.00553656
ENSG00000143158.6	MPC2	0.150699	0.00554059
ENSG00000091073.15	DTX2	0.12384	0.00556891
ENSG00000125485.13	DDX31	0.126592	0.00557454
ENSG00000135365.11	PHF21A	0.136123	0.00557949
ENSG00000166681.9	NGFRAP1	-0.218307	0.0056189
ENSG00000007264.9	MATK	0.117457	0.00563221
ENSG00000011243.13	AKAP8L	0.117529	0.00563221
ENSG00000138443.11	ABI2	-0.145553	0.0056405
ENSG00000164292.8	RHOBTB3	-0.273063	0.00568908
ENSG00000111669.10	TPI1	0.0926788	0.00569449
ENSG00000261221.1	ZNF865	0.163735	0.00573401
[truncated: 16,341 more rows]
