# Supplementary material for: Ribosome subunit attrition and activation of the p53–MDM4 axis dominate the response of MLL-rearranged cancer cells to WDR5 WIN site inhibition
Source: eLife. 2024 Apr 29;12:RP90683. doi: 10.7554/eLife.90683 (PMC11057873; doi:10.7554/eLife.90683)
Supplement: Figure 6—source data 8. [file elife-90683-fig6-data8.xlsx]

## Sheet: NT C16 vs DM A3SS
GeneID	geneSymbol	chr	strand	longExonStart_0base	longExonEnd	shortES	shortEE	flankingES	flankingEE	PValue	FDR	IncLevelDifference
ENSG00000163584.13	RPL22L1	chr3	-	170585801	170585990	170585801	170585923	170586086	170586176	0	0	-0.378
ENSG00000162613.12	FUBP1	chr1	-	78414089	78414599	78414089	78414459	78414839	78414985	9.8461e-11	3.96306e-07	-0.071
ENSG00000167535.3	CACNB3	chr12	+	49220027	49220301	49220202	49220301	49219442	49219552	1.98632e-09	5.32995e-06	0.332
ENSG00000143398.15	PIP5K1A	chr1	+	151196720	151196755	151196723	151196755	151170424	151170593	3.876e-09	6.26715e-06	-0.391
ENSG00000112739.12	PRPF4B	chr6	+	4061888	4062533	4062446	4062533	4061248	4061381	3.89264e-09	6.26715e-06	-0.06
ENSG00000041880.10	PARP3	chr3	+	51977364	51977554	51977369	51977554	51976952	51977062	1.89078e-08	2.5368e-05	-0.298
ENSG00000167535.3	CACNB3	chr12	+	49220149	49220301	49220202	49220301	49219442	49219552	2.48124e-08	2.85343e-05	0.124
ENSG00000204261.4	TAPSAR1	chr6	+	32812421	32812647	32812586	32812647	32811909	32812051	3.41684e-08	3.05618e-05	-0.142
ENSG00000148288.7	GBGT1	chr9	-	136031287	136031452	136031287	136031323	136036853	136036919	3.26421e-08	3.05618e-05	-0.061
ENSG00000262481.1	C17orf61-PLSCR3	chr17	-	7297422	7297590	7297422	7297586	7298226	7298409	7.75965e-08	6.24652e-05	-0.526
ENSG00000238105.3	GOLGA2B	chr12	-	100550942	100551223	100550942	100551034	100551305	100551517	9.62517e-08	7.04388e-05	-0.482
ENSG00000174938.10	SEZ6L2	chr16	-	29908142	29908442	29908142	29908232	29909173	29909305	1.96861e-07	0.000132061	0.07
ENSG00000123360.7	PDE1B	chr12	+	54962905	54963150	54962967	54963150	54960757	54960871	2.59806e-07	0.00016088	-0.131
ENSG00000146192.10	FGD2	chr6	+	36982356	36982480	36982421	36982480	36981384	36981541	2.80915e-07	0.000161526	-0.516
ENSG00000073331.13	ALPK1	chr4	+	113344881	113345159	113345099	113345159	113332982	113333181	3.43756e-07	0.000184482	-0.099
ENSG00000131080.10	EDA2R	chrX	-	65819325	65819708	65819325	65819702	65819880	65819937	5.18409e-07	0.000231844	-0.569
ENSG00000155229.16	MMS19	chr10	-	99227261	99227360	99227261	99227340	99229402	99229480	5.15016e-07	0.000231844	-0.226
ENSG00000109046.10	WSB1	chr17	+	25634769	25636298	25636125	25636298	25633807	25633908	4.89109e-07	0.000231844	-0.075
ENSG00000174516.10	PELI3	chr11	+	66243042	66244808	66243068	66244808	66241207	66241396	5.62476e-07	0.000238312	0.092
ENSG00000103248.13	MTHFSD	chr16	-	86588250	86588357	86588250	86588354	86588778	86588841	6.79823e-07	0.000260599	-0.378
ENSG00000099622.9	CIRBP	chr19	+	1270865	1271035	1270926	1271035	1267227	1267291	6.54624e-07	0.000260599	-0.07
ENSG00000177873.8	ZNF619	chr3	+	40523690	40523840	40523720	40523840	40523353	40523507	1.27804e-06	0.000412484	-0.254
ENSG00000103064.9	SLC7A6	chr16	+	68307697	68307807	68307720	68307807	68298462	68298479	1.197e-06	0.000412484	-0.225
ENSG00000173402.7	DAG1	chr3	+	49524660	49524848	49524686	49524848	49514281	49514333	1.281e-06	0.000412484	-0.21
ENSG00000151651.11	ADAM8	chr10	-	135086757	135086947	135086757	135086934	135087265	135087342	1.25606e-06	0.000412484	-0.207
ENSG00000144524.13	COPS7B	chr2	+	232665849	232665917	232665864	232665917	232663568	232663674	2.28843e-06	0.000661605	-0.214
ENSG00000166313.14	APBB1	chr11	-	6423311	6423955	6423311	6423439	6424374	6424438	2.39761e-06	0.000665544	-0.123
ENSG00000100027.10	YPEL1	chr22	-	22058127	22058414	22058127	22058171	22064775	22065197	4.57131e-06	0.00114997	-0.358
ENSG00000087157.14	PGS1	chr17	+	76410959	76411108	76411032	76411108	76399648	76400170	5.08449e-06	0.00124031	0.127
ENSG00000170271.6	FAXDC2	chr5	-	154214402	154214679	154214402	154214494	154217690	154217738	6.44781e-06	0.0014418	0.185
ENSG00000063978.11	RNF4	chr4	+	2496290	2496479	2496293	2496479	2492063	2492229	1.30744e-05	0.00276971	0.287
ENSG00000262481.1	C17orf61-PLSCR3	chr17	-	7297422	7298053	7297422	7297586	7298226	7298409	1.34718e-05	0.00278072	-0.162
ENSG00000236830.2	CBR3-AS1	chr21	-	37518553	37519923	37518553	37518653	37520267	37523008	1.45518e-05	0.00288012	-0.147
ENSG00000174365.15	SNHG11	chr20	+	37077304	37077373	37077308	37077373	37076108	37076266	1.46689e-05	0.00288012	-0.081
ENSG00000185803.4	SLC52A2	chr8	+	145582843	145583083	145582847	145583083	145582252	145582560	1.98551e-05	0.00363258	-0.084
ENSG00000185340.11	GAS2L1	chr22	+	29707451	29708774	29708131	29708774	29706816	29706988	2.19875e-05	0.00376595	-0.073
ENSG00000011143.12	MKS1	chr17	-	56285465	56285611	56285465	56285535	56285873	56285944	2.1625e-05	0.00376595	0.053
ENSG00000172262.7	ZNF131	chr5	+	43122140	43122279	43122145	43122279	43121021	43121225	2.45133e-05	0.00402718	-0.052
ENSG00000196684.8	HSH2D	chr19	+	16263841	16264018	16263852	16264018	16263361	16263451	2.42215e-05	0.00402718	0.121
ENSG00000159753.9	RLTPR	chr16	+	67690096	67690202	67690130	67690202	67689933	67689970	2.58477e-05	0.00416147	-0.507
ENSG00000153885.10	KCTD15	chr19	+	34289572	34289671	34289575	34289671	34289241	34289295	2.93284e-05	0.00462929	0.304
ENSG00000113812.9	ACTR8	chr3	-	53907058	53907173	53907058	53907154	53909974	53910107	3.33005e-05	0.0048805	-0.127
ENSG00000146067.11	FAM193B	chr5	-	176963358	176963746	176963358	176963487	176964873	176965108	3.2487e-05	0.0048805	0.056
ENSG00000092529.18	CAPN3	chr15	+	42702605	42702694	42702629	42702694	42702128	42702193	3.40817e-05	0.00489925	0.494
ENSG00000031823.10	RANBP3	chr19	-	5950727	5950886	5950727	5950883	5951403	5951607	3.52884e-05	0.00498372	-0.191
ENSG00000145014.13	TMEM44	chr3	-	194336297	194336426	194336297	194336399	194337498	194337620	3.84305e-05	0.00524348	-0.176
ENSG00000186364.7	NUDT17	chr1	-	145588377	145588635	145588377	145588470	145588871	145589055	4.1118e-05	0.00542622	-0.224
ENSG00000118495.14	PLAGL1	chr6	-	144281605	144281717	144281605	144281693	144285923	144285955	4.0682e-05	0.00542622	0.142
ENSG00000120896.9	SORBS3	chr8	+	22423338	22423997	22423857	22423997	22422780	22422867	4.46792e-05	0.005709	0.092
ENSG00000255036.1	RP11-23J9.4	chr9	+	100122263	100122383	100122267	100122383	100119908	100120007	4.58667e-05	0.00576918	-0.51
ENSG00000113407.9	TARS	chr5	+	33446712	33446870	33446749	33446870	33445429	33445510	4.75761e-05	0.00589212	-0.15
ENSG00000093183.9	SEC22C	chr3	-	42589460	42594940	42589460	42590149	42599069	42599188	5.02757e-05	0.00604507	-0.124
ENSG00000240344.4	PPIL3	chr2	-	201747064	201747158	201747064	201747105	201749984	201750090	5.0313e-05	0.00604507	-0.078
ENSG00000170919.11	TPT1-AS1	chr13	+	45951195	45951350	45951246	45951350	45944093	45944317	6.41155e-05	0.00759014	0.183
ENSG00000069329.11	VPS35	chr16	-	46716389	46716596	46716389	46716578	46717419	46717518	6.6895e-05	0.00780442	-0.314
ENSG00000168890.9	TMEM150A	chr2	-	85828143	85828605	85828143	85828230	85829006	85829187	8.26784e-05	0.0092439	0.076
ENSG00000117262.14	GPR89A	chr1	-	145788766	145788855	145788766	145788835	145789295	145790953	8.56906e-05	0.00944944	-0.227
ENSG00000051825.10	MPHOSPH9	chr12	-	123712009	123712163	123712009	123712119	123714807	123715069	9.22922e-05	0.0100399	0.07
ENSG00000161265.10	U2AF1L4	chr19	-	36233432	36234106	36233432	36233704	36234709	36234805	9.56723e-05	0.0102688	0.087
ENSG00000134222.12	PSRC1	chr1	-	109825301	109825411	109825301	109825358	109825649	109825747	9.86441e-05	0.010332	-0.215
ENSG00000185306.8	C12orf56	chr12	-	64668680	64669152	64668680	64668755	64678443	64678533	0.000111269	0.0113382	-0.111
ENSG00000127957.12	PMS2P3	chr7	-	75143969	75144109	75143969	75144104	75145042	75145153	0.000110557	0.0113382	0.087
ENSG00000125485.13	DDX31	chr9	-	135505650	135505790	135505650	135505765	135507427	135507478	0.000118376	0.0116211	-0.071
ENSG00000127616.13	SMARCA4	chr19	+	11094796	11095049	11094799	11095049	11088328	11088491	0.000123568	0.0119846	-0.257
ENSG00000126705.9	AHDC1	chr1	-	27879584	27879801	27879584	27879696	27885216	27885394	0.000147501	0.0135161	0.125
ENSG00000205133.7	TRIQK	chr8	-	93929156	93929238	93929156	93929235	93966633	93966792	0.000143269	0.0135161	0.135
ENSG00000149474.9	CSRP2BP	chr20	+	18142463	18142883	18142466	18142883	18131464	18131586	0.000145455	0.0135161	0.155
ENSG00000111674.4	ENO2	chr12	+	7024981	7025081	7024984	7025081	7023752	7023823	0.000147754	0.0135161	0.184
ENSG00000123415.10	SMUG1	chr12	-	54581602	54581689	54581602	54581686	54582509	54582741	0.00015322	0.0138586	-0.335
ENSG00000118495.14	PLAGL1	chr6	-	144287294	144287422	144287294	144287367	144290043	144290115	0.00017152	0.0144708	-0.367
ENSG00000100417.7	PMM1	chr22	-	41979962	41980376	41979962	41980062	41980530	41980607	0.000171416	0.0144708	-0.067
ENSG00000018510.8	AGPS	chr2	+	178385996	178386096	178386056	178386096	178284996	178285086	0.000166228	0.0144708	-0.056
ENSG00000114107.4	CEP70	chr3	-	138291700	138291826	138291700	138291774	138310695	138310798	0.000172571	0.0144708	0.077
ENSG00000176715.11	ACSF3	chr16	+	89211621	89211809	89211674	89211809	89207474	89207684	0.000177405	0.0146394	-0.184
ENSG00000116353.11	MECR	chr1	-	29543099	29543324	29543099	29543197	29547345	29547433	0.000181551	0.0146394	-0.057
ENSG00000130731.11	C16orf13	chr16	-	684888	685063	684888	684956	685280	685340	0.000179833	0.0146394	0.065
ENSG00000102710.15	SUPT20H	chr13	-	37596147	37597181	37596147	37596454	37598171	37598330	0.000213556	0.0163727	-0.182
ENSG00000223960.2	AC009948.5	chr2	+	179295404	179295616	179295496	179295616	179291092	179291430	0.000218027	0.0165577	0.053
ENSG00000154144.8	TBRG1	chr11	+	124496708	124496946	124496799	124496946	124496368	124496505	0.000249592	0.0184626	-0.127
ENSG00000223960.2	AC009948.5	chr2	+	179295421	179295616	179295496	179295616	179291092	179291430	0.000256535	0.0186473	0.051
ENSG00000004399.8	PLXND1	chr3	-	129304794	129304924	129304794	129304891	129305430	129305562	0.00027478	0.019575	0.074
ENSG00000105879.7	CBLL1	chr7	+	107393855	107393956	107393858	107393956	107392989	107393062	0.000284422	0.0200453	-0.121
ENSG00000267123.1	CTD-2357A8.3	chr17	-	76626113	76626512	76626113	76626362	76628030	76628133	0.000298418	0.0207092	0.099
ENSG00000169660.11	HEXDC	chr17	+	80399028	80399142	80399040	80399142	80398872	80398951	0.000302446	0.0208093	0.069
ENSG00000204622.6	HLA-J	chr6	+	29976814	29976954	29976921	29976954	29976361	29976478	0.000305653	0.0208518	-0.29
ENSG00000015153.10	YAF2	chr12	-	42604349	42604482	42604349	42604421	42631400	42631526	0.000312208	0.0211199	-0.264
ENSG00000026950.12	BTN3A1	chr6	+	26407898	26408180	26408054	26408180	26406136	26406484	0.000317762	0.0213166	0.095
ENSG00000079616.8	KIF22	chr16	+	29815896	29816347	29816134	29816347	29815318	29815386	0.000328408	0.0217577	-0.057
ENSG00000144136.6	SLC20A1	chr2	+	113416527	113416671	113416550	113416671	113414698	113414818	0.000329745	0.0217577	0.066
ENSG00000149269.5	PAK1	chr11	-	77103375	77103586	77103375	77103583	77119198	77119277	0.000370528	0.0237993	-0.151
ENSG00000188818.8	ZDHHC11	chr5	-	840609	840765	840609	840712	840917	842610	0.000369465	0.0237993	0.163
ENSG00000046651.10	OFD1	chrX	+	13770822	13771560	13771486	13771560	13769367	13769487	0.000381088	0.0239669	-0.059
ENSG00000145014.13	TMEM44	chr3	-	194346625	194346719	194346625	194346655	194349111	194349238	0.000435124	0.0263364	-0.067
ENSG00000137842.2	TMEM62	chr15	+	43441226	43441349	43441305	43441349	43440952	43441077	0.000446833	0.0266445	-0.093
ENSG00000166313.14	APBB1	chr11	-	6422803	6422924	6422803	6422918	6423311	6423439	0.00046728	0.027457	0.054
ENSG00000186818.8	LILRB4	chr19	+	55178144	55178200	55178147	55178200	55177265	55177382	0.000497197	0.0290032	-0.393
ENSG00000137817.12	PARP6	chr15	-	72563363	72563628	72563363	72563622	72564621	72564912	0.000509714	0.0295194	-0.081
ENSG00000239382.6	ALKBH6	chr19	-	36501468	36501585	36501468	36501547	36501795	36501947	0.000514631	0.0295913	0.074
ENSG00000167733.9	HSD11B1L	chr19	+	5684999	5685130	5685003	5685130	5684829	5684916	0.000529598	0.0302359	-0.296
ENSG00000101473.12	ACOT8	chr20	-	44482561	44482623	44482561	44482618	44483797	44483931	0.000536267	0.030401	0.242
ENSG00000185499.12	MUC1	chr1	-	155160638	155160761	155160638	155160707	155161973	155162074	0.000552217	0.0310864	0.279
ENSG00000178694.5	NSUN3	chr3	+	93802950	93803294	93803198	93803294	93783280	93783390	0.000561928	0.0313225	0.064
ENSG00000158636.12	C11orf30	chr11	+	76253211	76253411	76253259	76253411	76239311	76239510	0.000588514	0.0319608	-0.168
ENSG00000048740.13	CELF2	chr10	+	11363151	11363349	11363169	11363349	11330380	11330515	0.000582141	0.0319608	-0.142
ENSG00000160410.10	SHKBP1	chr19	+	41089506	41089623	41089514	41089623	41088331	41088372	0.000591573	0.0319608	-0.103
ENSG00000163482.7	STK36	chr2	+	219554581	219554679	219554608	219554679	219553419	219553599	0.000652646	0.0338955	0.06
ENSG00000167550.6	RHEBL1	chr12	-	49462817	49462957	49462817	49462889	49463516	49463808	0.000642408	0.0338955	0.11
ENSG00000050748.13	MAPK9	chr5	-	179660593	179663531	179660593	179663526	179666923	179666987	0.000692099	0.0354866	0.435
ENSG00000079150.13	FKBP7	chr2	-	179334378	179334512	179334378	179334509	179341788	179341940	0.000710465	0.0361977	0.148
ENSG00000122085.12	MTERFD2	chr2	-	242033691	242033847	242033691	242033844	242036657	242036842	0.00071738	0.0363202	0.13
ENSG00000085382.7	HACE1	chr6	-	105224887	105224985	105224887	105224972	105225080	105225192	0.000741745	0.0370872	-0.094
ENSG00000125967.12	NECAB3	chr20	-	32258489	32258598	32258489	32258566	32260203	32260228	0.000752206	0.0373782	-0.051
ENSG00000101665.4	SMAD7	chr18	-	46468850	46468925	46468850	46468922	46474753	46474807	0.000772623	0.0381019	-0.122
ENSG00000196628.9	TCF4	chr18	-	53018104	53018234	53018104	53018231	53070684	53070749	0.000776238	0.0381019	-0.056
ENSG00000122490.14	PQLC1	chr18	-	77709518	77709655	77709518	77709636	77710723	77711025	0.000788427	0.038234	-0.125
ENSG00000137185.7	ZSCAN9	chr6	+	28198113	28198266	28198179	28198266	28195467	28195615	0.000784402	0.038234	0.085
ENSG00000160408.10	ST6GALNAC6	chr9	-	130656790	130656970	130656790	130656908	130658520	130658611	0.000807906	0.0387121	0.087
ENSG00000136840.14	ST6GALNAC4	chr9	-	130672229	130672807	130672229	130672337	130674546	130674959	0.000836143	0.0393623	0.054
ENSG00000169519.15	METTL15	chr11	+	28318299	28318478	28318343	28318478	28232608	28232745	0.000828216	0.0393623	0.074
ENSG00000198270.8	TMEM116	chr12	-	112371689	112374634	112371689	112371834	112374963	112375047	0.000887151	0.0410663	-0.106
ENSG00000143851.11	PTPN7	chr1	-	202127245	202127448	202127245	202127429	202129672	202129736	0.000947104	0.0430745	-0.107
ENSG00000020633.14	RUNX3	chr1	-	25291004	25291159	25291004	25291070	25291510	25291612	0.000975549	0.0438725	-0.089
ENSG00000068120.10	COASY	chr17	+	40714313	40714505	40714373	40714505	40714168	40714237	0.00100403	0.0444091	-0.056
ENSG00000139746.11	RBM26	chr13	-	79928573	79928705	79928573	79928696	79929354	79929519	0.00101258	0.0445425	-0.067
ENSG00000124920.9	MYRF	chr11	+	61550969	61551072	61550984	61551072	61549044	61549296	0.00106228	0.0462233	-0.1
ENSG00000064012.17	CASP8	chr2	+	202131183	202131514	202131209	202131514	202125222	202125336	0.00109275	0.0472937	-0.062
ENSG00000141503.11	MINK1	chr17	+	4793516	4794030	4793811	4794030	4792941	4793058	0.00110598	0.0473571	-0.079
ENSG00000164880.11	INTS1	chr7	-	1520470	1520593	1520470	1520569	1520890	1521124	0.00110049	0.0473571	0.474
ENSG00000135363.7	LMO2	chr11	-	33886147	33886475	33886147	33886363	33903369	33903433	0.00115587	0.0484621	-0.063
ENSG00000167733.9	HSD11B1L	chr19	+	5687763	5688533	5687926	5688533	5687513	5687679	0.00117674	0.0490814	0.08
ENSG00000055483.15	USP36	chr17	-	76791734	76793984	76791734	76793961	76794481	76794633	0.00118491	0.0491678	0.087
ENSG00000250337.1	LINC01021	chr5	+	27494225	27494425	27494341	27494425	27475641	27475802	0.00120926	0.0494138	-0.113
ENSG00000132635.12	PCED1A	chr20	-	2819489	2819728	2819489	2819575	2819837	2819917	0.00120527	0.0494138	-0.073
ENSG00000187741.10	FANCA	chr16	-	89877336	89877479	89877336	89877465	89882284	89882394	0.00120877	0.0494138	0.14
ENSG00000117616.13	C1orf63	chr1	-	25570040	25570715	25570040	25570124	25570944	25570989	0.00122037	0.0494743	-0.06

## Sheet: NT C16 vs DM A5SS
GeneID	geneSymbol	chr	strand	longExonStart_0base	longExonEnd	shortES	shortEE	flankingES	flankingEE	PValue	FDR	IncLevelDifference
ENSG00000122952.12	ZWINT	chr10	-	58118565	58118708	58118669	58118708	58118316	58118448	3.33067e-16	1.76092e-12	0.119
ENSG00000168488.14	ATXN2L	chr16	+	28847253	28847806	28847253	28847443	28848048	28848558	7.83303e-10	2.07066e-06	-0.152
ENSG00000164896.15	FASTK	chr7	-	150773999	150774323	150774187	150774323	150773712	150773919	9.98591e-09	1.75985e-05	-0.052
ENSG00000169231.9	THBS3	chr1	-	155172876	155172928	155172883	155172928	155172602	155172751	4.62979e-08	6.11942e-05	-0.116
ENSG00000204310.6	AGPAT1	chr6	-	32139026	32139282	32139073	32139282	32138201	32138377	6.00912e-08	6.35405e-05	0.404
ENSG00000164039.10	BDH2	chr4	-	104006505	104007697	104007636	104007697	104004027	104004086	7.41492e-08	6.53378e-05	-0.15
ENSG00000167646.9	DNAAF3	chr19	-	55677149	55677368	55677225	55677368	55676737	55676831	1.03978e-07	7.85334e-05	0.271
ENSG00000173402.7	DAG1	chr3	+	49514281	49514338	49514281	49514333	49524686	49524848	1.5022e-07	8.35658e-05	-0.381
ENSG00000128159.7	TUBGCP6	chr22	-	50658620	50660303	50658679	50660303	50658385	50658444	1.53532e-07	8.35658e-05	-0.248
ENSG00000181396.8	OGFOD3	chr17	-	80373273	80373503	80373281	80373503	80369330	80369406	1.58059e-07	8.35658e-05	0.079
ENSG00000118369.8	USP35	chr11	+	77916887	77917085	77916887	77917081	77918575	77918669	2.79033e-07	0.000122937	0.089
ENSG00000159210.5	SNF8	chr17	-	47013492	47013604	47013531	47013604	47009004	47009079	5.34179e-07	0.000217247	-0.529
ENSG00000198208.7	RPS6KL1	chr14	-	75375803	75376851	75376245	75376851	75375552	75375635	5.76422e-07	0.000217682	-0.178
ENSG00000179532.8	DNHD1	chr11	+	6584211	6584485	6584211	6584361	6584611	6584794	6.19006e-07	0.000218179	-0.295
ENSG00000140332.11	TLE3	chr15	-	70349797	70349997	70349812	70349997	70347387	70347637	8.96408e-07	0.000296207	-0.559
ENSG00000165480.11	SKA3	chr13	-	21750486	21750690	21750513	21750690	21729831	21729950	1.45436e-06	0.000404695	-0.233
ENSG00000244026.2	FAM86DP	chr3	-	75483875	75484199	75484068	75484199	75481958	75482021	1.98447e-06	0.000524595	0.081
ENSG00000182718.12	ANXA2	chr15	-	60688349	60688626	60688478	60688626	60678226	60678285	2.30792e-06	0.000554635	0.144
ENSG00000261008.2	AC004158.2	chr16	-	72604333	72604414	72604349	72604414	72589163	72589225	3.02694e-06	0.00066681	0.25
ENSG00000124333.10	VAMP7	chrX	+	155119120	155119296	155119120	155119271	155125285	155125343	3.65999e-06	0.000774014	0.126
ENSG00000176978.9	DPP7	chr9	-	140007171	140007257	140007196	140007257	140006563	140006621	3.95637e-06	0.000804512	0.066
ENSG00000188493.10	C19orf54	chr19	-	41248303	41248675	41248419	41248675	41246760	41247344	5.21542e-06	0.00102126	0.075
ENSG00000116353.11	MECR	chr1	-	29547345	29547433	29547349	29547433	29543099	29543197	6.01776e-06	0.00113628	0.139
ENSG00000168488.14	ATXN2L	chr16	+	28847253	28847497	28847253	28847443	28847646	28847811	7.78404e-06	0.00134029	-0.177
ENSG00000177595.13	PIDD	chr11	-	800984	801120	801017	801120	800761	800912	7.86473e-06	0.00134029	0.058
ENSG00000168002.7	POLR2G	chr11	+	62529266	62530338	62529266	62529376	62532653	62532704	8.22776e-06	0.00134029	0.094
ENSG00000160193.7	WDR4	chr21	-	44293660	44293801	44293712	44293801	44283549	44283706	7.75347e-06	0.00134029	0.114
ENSG00000102125.11	TAZ	chrX	+	153641543	153641695	153641543	153641676	153641818	153641904	8.36571e-06	0.00134029	0.304
ENSG00000068745.10	IP6K2	chr3	-	48752747	48752960	48752821	48752960	48732522	48732851	8.85472e-06	0.00137691	-0.234
ENSG00000183060.11	LYSMD4	chr15	-	100271759	100272212	100271922	100272212	100271377	100271403	9.44773e-06	0.00142715	-0.128
ENSG00000026508.12	CD44	chr11	+	35229651	35229756	35229651	35229753	35232792	35232996	9.73661e-06	0.00142993	-0.345
ENSG00000116353.11	MECR	chr1	-	29547228	29547433	29547345	29547433	29543099	29543197	1.17261e-05	0.00154989	-0.274
ENSG00000183060.11	LYSMD4	chr15	-	100271562	100272212	100271922	100272212	100271377	100271403	1.15037e-05	0.00154989	-0.124
ENSG00000112715.16	VEGFA	chr6	+	43748468	43748591	43748468	43748540	43749692	43749824	1.14678e-05	0.00154989	0.181
ENSG00000167207.7	NOD2	chr16	+	50746104	50746548	50746104	50746312	50750497	50750581	1.28296e-05	0.001615	-0.145
ENSG00000116001.11	TIA1	chr2	-	70443884	70444126	70444017	70444126	70443535	70443631	1.25545e-05	0.001615	-0.051
ENSG00000132424.10	PNISR	chr6	-	99851704	99852578	99852478	99852578	99850415	99850586	1.44184e-05	0.001694	-0.065
ENSG00000188917.10	TRMT2B	chrX	-	100306772	100307105	100306805	100307105	100291962	100292062	1.40396e-05	0.001694	0.165
ENSG00000044090.4	CUL7	chr6	-	43019850	43020534	43019946	43020534	43019349	43019501	1.6093e-05	0.00184965	-0.093
ENSG00000189308.6	LIN54	chr4	-	83905313	83906029	83905976	83906029	83867410	83867627	1.67916e-05	0.00188887	-0.059
ENSG00000101194.13	SLC17A9	chr20	+	61594935	61595374	61594935	61595032	61595579	61595667	2.03922e-05	0.00220028	-0.059
ENSG00000196182.6	STK40	chr1	-	36833448	36833685	36833452	36833685	36828159	36828257	2.44838e-05	0.00258892	-0.296
ENSG00000186814.8	ZSCAN30	chr18	-	32870047	32870196	32870094	32870196	32847439	32847646	2.83048e-05	0.00293427	0.349
ENSG00000073536.13	NLE1	chr17	-	33466838	33467085	33466867	33467085	33466253	33466333	2.88618e-05	0.00293446	-0.062
ENSG00000183426.11	NPIPA1	chr16	+	15023107	15023888	15023107	15023278	15024022	15024179	3.03762e-05	0.00303017	-0.082
ENSG00000204634.8	TBC1D8	chr2	-	101706670	101706826	101706715	101706826	101675882	101676001	3.13402e-05	0.00306844	0.073
ENSG00000177058.7	SLC38A9	chr5	-	55007179	55007327	55007279	55007327	54998566	54998722	3.816e-05	0.00342938	-0.251
ENSG00000186815.8	TPCN1	chr12	+	113659242	113659431	113659242	113659388	113664532	113664769	3.827e-05	0.00342938	0.13
ENSG00000197111.11	PCBP2	chr12	+	53854114	53854470	53854114	53854209	53854798	53854927	4.09852e-05	0.00355227	-0.069
ENSG00000181555.15	SETD2	chr3	-	47122290	47122573	47122405	47122573	47108559	47108608	4.23019e-05	0.00360726	-0.189
ENSG00000123415.10	SMUG1	chr12	-	54582294	54582380	54582298	54582380	54581602	54581689	4.36906e-05	0.00366654	0.31
ENSG00000125107.12	CNOT1	chr16	-	58658556	58658698	58658576	58658698	58657185	58657313	5.22113e-05	0.00418244	-0.067
ENSG00000102103.11	PQBP1	chrX	+	48755194	48755376	48755194	48755365	48758466	48758578	5.62892e-05	0.0044418	0.298
ENSG00000177646.13	ACAD9	chr3	+	128598471	128598860	128598471	128598684	128603495	128603589	6.47932e-05	0.00496466	-0.066
ENSG00000103024.3	NME3	chr16	-	1821269	1821411	1821280	1821411	1820881	1820994	6.7969e-05	0.0050613	-0.098
ENSG00000008130.11	NADK	chr1	-	1688177	1688321	1688217	1688321	1687941	1688047	6.74415e-05	0.0050613	0.262
ENSG00000103248.13	MTHFSD	chr16	-	86588774	86588841	86588778	86588841	86588250	86588354	8.16132e-05	0.00583094	-0.076
ENSG00000261008.2	AC004158.2	chr16	-	72604333	72604414	72604349	72604414	72574476	72574510	8.06796e-05	0.00583094	0.346
ENSG00000107404.13	DVL1	chr1	-	1274666	1274819	1274741	1274819	1273901	1274033	8.36193e-05	0.0058946	0.102
ENSG00000108773.6	KAT2A	chr17	-	40271071	40271454	40271262	40271454	40270314	40270421	9.05496e-05	0.00613764	-0.078
ENSG00000244687.7	UBE2V1	chr20	-	48732235	48732491	48732366	48732491	48732021	48732158	0.000106793	0.00714699	0.143
ENSG00000104907.8	TRMT1	chr19	-	13226919	13227245	13226959	13227245	13226439	13226582	0.000115984	0.00766512	-0.127
ENSG00000011021.17	CLCN6	chr1	+	11886212	11886281	11886212	11886271	11887171	11887278	0.000134359	0.0087698	0.294
ENSG00000058673.11	ZC3H11A	chr1	+	203765420	203765729	203765420	203765624	203770702	203770756	0.000144322	0.00919312	-0.095
ENSG00000237441.5	RGL2	chr6	-	33261571	33261843	33261810	33261843	33261189	33261301	0.000150147	0.00945034	-0.125
ENSG00000168385.13	SEPT2	chr2	+	242255836	242255990	242255836	242255955	242263630	242263656	0.000167807	0.0104353	0.118
ENSG00000134748.12	PRPF38A	chr1	+	52871351	52871511	52871351	52871385	52878185	52878296	0.000173851	0.0105649	-0.061
ENSG00000116353.11	MECR	chr1	-	29547345	29547433	29547349	29547433	29543099	29543324	0.000184472	0.011083	0.234
ENSG00000104164.6	BLOC1S6	chr15	+	45890077	45890194	45890077	45890089	45893431	45893605	0.00020837	0.0123781	-0.081
ENSG00000173889.11	PHC3	chr3	-	169899474	169899521	169899489	169899521	169896560	169896726	0.00021147	0.0123843	-0.085
ENSG00000142512.10	SIGLEC10	chr19	-	51919151	51919611	51919563	51919611	51918821	51918869	0.000255865	0.0142395	-0.242
ENSG00000205726.9	ITSN1	chr21	+	35201309	35201472	35201309	35201354	35201927	35202049	0.000261628	0.014385	-0.342
ENSG00000129465.11	RIPK3	chr14	-	24807416	24807501	24807454	24807501	24807078	24807246	0.000264378	0.014385	-0.134
ENSG00000004809.9	SLC22A16	chr6	-	110777740	110778220	110778102	110778220	110763446	110763978	0.000293914	0.0152345	-0.138
ENSG00000077782.15	FGFR1	chr8	-	38277050	38277253	38277056	38277253	38275745	38275891	0.000292806	0.0152345	-0.137
ENSG00000139620.8	KANSL2	chr12	-	49054148	49054402	49054250	49054402	49048723	49048843	0.000286327	0.0152345	0.053
ENSG00000133816.9	MICAL2	chr11	+	12159936	12160011	12159936	12160007	12183625	12183966	0.000305627	0.0156304	0.126
ENSG00000102125.11	TAZ	chrX	+	153641543	153641689	153641543	153641676	153641818	153641904	0.000313377	0.0156304	0.377
ENSG00000167646.9	DNAAF3	chr19	-	55677879	55677944	55677890	55677944	55677696	55677785	0.000312098	0.0156304	0.443
ENSG00000108465.10	CDK5RAP3	chr17	+	46050884	46051062	46050884	46051059	46051296	46051397	0.000336143	0.0163045	0.134
ENSG00000242086.4	LINC00969	chr3	+	195435024	195435384	195435024	195435139	195435617	195435712	0.000364106	0.0175003	-0.233
ENSG00000176261.11	ZBTB8OS	chr1	-	33116002	33116126	33116033	33116126	33097427	33097480	0.000400712	0.0189157	-0.328
ENSG00000069493.10	CLEC2D	chr12	+	9840497	9840757	9840497	9840682	9845423	9845527	0.000407661	0.0190735	-0.066
ENSG00000130669.13	PAK4	chr19	+	39658869	39658952	39658869	39658942	39659264	39659480	0.000422857	0.0194558	-0.23
ENSG00000102125.11	TAZ	chrX	+	153641543	153641676	153641543	153641589	153641818	153641904	0.000446649	0.0201832	-0.075
ENSG00000197935.6	ZNF311	chr6	-	28967263	28967824	28967732	28967824	28966510	28966615	0.000467007	0.0209243	0.1
ENSG00000115677.12	HDLBP	chr2	-	242208615	242208710	242208620	242208710	242207891	242207956	0.000506982	0.0223368	-0.112
ENSG00000068137.10	PLEKHH3	chr17	-	40821935	40822394	40821960	40822394	40821447	40821639	0.000505695	0.0223368	0.342
ENSG00000179818.9	PCBP1-AS1	chr2	-	70310638	70310819	70310669	70310819	70282845	70283042	0.000512978	0.0224142	0.338
ENSG00000154358.15	OBSCN	chr1	+	228543851	228544045	228543851	228543894	228547297	228548951	0.000536163	0.0227553	-0.09
ENSG00000173681.12	CXorf23	chrX	-	19955535	19955650	19955622	19955650	19947902	19948058	0.000574446	0.0233623	0.291
ENSG00000174652.13	ZNF266	chr19	-	9529437	9529975	9529726	9529975	9529180	9529307	0.000587731	0.0235404	-0.122
ENSG00000109065.7	NAT9	chr17	-	72771737	72771846	72771760	72771846	72770004	72770078	0.000609773	0.0237049	-0.055
ENSG00000177595.13	PIDD	chr11	-	801001	801120	801017	801120	800761	800912	0.000599076	0.0237049	0.123
ENSG00000026508.12	CD44	chr11	+	35229651	35229756	35229651	35229753	35236398	35236461	0.000623282	0.0238789	0.244
ENSG00000174197.12	MGA	chr15	+	42028378	42028896	42028378	42028566	42032250	42032401	0.000628291	0.0238976	-0.053
ENSG00000134030.9	CTIF	chr18	+	46284289	46284782	46284289	46284776	46287760	46288060	0.000724523	0.0269199	-0.173
ENSG00000141560.10	FN3KRP	chr17	+	80678636	80678841	80678636	80678717	80680679	80680762	0.000743498	0.0271095	-0.256
ENSG00000242086.4	LINC00969	chr3	+	195435024	195435306	195435024	195435139	195435617	195435712	0.000753482	0.0272853	-0.22
ENSG00000011021.17	CLCN6	chr1	+	11886212	11886281	11886212	11886271	11887145	11887278	0.000843085	0.0300344	0.066
ENSG00000243716.6	NPIPB5	chr16	+	22503027	22503147	22503027	22503107	22518657	22518720	0.000908548	0.0320233	-0.296
ENSG00000234684.2	SDCBP2-AS1	chr20	+	1306064	1306426	1306064	1306173	1353721	1353822	0.000959149	0.0335829	0.083
ENSG00000141994.11	DUS3L	chr19	-	5786759	5787182	5787071	5787182	5786477	5786553	0.000988067	0.0343678	-0.057
ENSG00000009950.11	MLXIPL	chr7	-	73021465	73021750	73021660	73021750	73021303	73021348	0.00101421	0.0350466	-0.293
ENSG00000179818.9	PCBP1-AS1	chr2	-	70310638	70310819	70310669	70310819	70304432	70304513	0.00103822	0.0356432	-0.251
ENSG00000163138.14	PACRGL	chr4	+	20702081	20702370	20702081	20702329	20706088	20706156	0.00109272	0.0370335	-0.078
ENSG00000178922.12	HYI	chr1	-	43919056	43919168	43919083	43919168	43918573	43918675	0.00113969	0.0383791	-0.199
ENSG00000242086.4	LINC00969	chr3	+	195435004	195435258	195435004	195435139	195435617	195435712	0.0011722	0.0389774	-0.215
ENSG00000182446.9	NPLOC4	chr17	-	79534959	79535101	79534979	79535101	79534442	79534559	0.00122014	0.0400675	0.204
ENSG00000110455.9	ACCS	chr11	+	44089177	44089328	44089177	44089324	44092805	44092865	0.00128207	0.041331	-0.5
ENSG00000129757.8	CDKN1C	chr11	-	2905899	2906696	2906431	2906696	2905228	2905364	0.0012809	0.041331	-0.224
ENSG00000102125.11	TAZ	chrX	+	153641543	153641707	153641543	153641676	153641818	153641904	0.00132897	0.0420733	0.297
ENSG00000117616.13	C1orf63	chr1	-	25570667	25571792	25571640	25571792	25570040	25570124	0.00144378	0.0448704	-0.07
ENSG00000175048.12	ZDHHC14	chr6	+	158049380	158049518	158049380	158049406	158053865	158053914	0.00144747	0.0448704	0.08
ENSG00000148985.15	PGAP2	chr11	+	3845499	3845679	3845499	3845606	3846249	3846358	0.00148	0.0452299	-0.103
ENSG00000046647.9	GEMIN8	chrX	-	14044170	14044340	14044258	14044340	14039582	14039630	0.00147146	0.0452299	-0.096
ENSG00000188282.8	RUFY4	chr2	+	218938538	218938668	218938538	218938608	218939815	218940463	0.00153667	0.046425	-0.371
ENSG00000141577.9	AZI1	chr17	-	79171905	79172097	79171914	79172097	79171511	79171688	0.00159954	0.0479364	-0.181
ENSG00000127054.14	CPSF3L	chr1	-	1258271	1258667	1258526	1258667	1256375	1256473	0.00160483	0.0479364	-0.134
ENSG00000163472.14	TMEM79	chr1	+	156254974	156256264	156254974	156255774	156261175	156262234	0.00165143	0.0490513	-0.072
ENSG00000115694.10	STK25	chr2	-	242436596	242436793	242436714	242436793	242435812	242435949	0.00168487	0.0494884	-0.059
ENSG00000137411.12	VARS2	chr6	+	30881981	30882814	30881981	30882121	30882932	30883014	0.00170503	0.0495807	0.069

## Sheet: NT C16 vs DM SE
GeneID	geneSymbol	chr	strand	exonStart_0base	exonEnd	upstreamES	upstreamEE	downstreamES	downstreamEE	PValue	FDR	IncLevelDifference
ENSG00000160285.10	LSS	chr21	-	47610989	47611149	47608359	47608735	47611794	47613401	0	0	0.089
ENSG00000160285.10	LSS	chr21	-	47610979	47611149	47608054	47608735	47611794	47611873	0	0	0.09
ENSG00000198625.8	MDM4	chr1	+	204506586	204506625	204501318	204501374	204507336	204507436	0	0	0.386
ENSG00000198625.8	MDM4	chr1	+	204506557	204506625	204501318	204501374	204507336	204507436	0	0	0.494
ENSG00000117899.6	MESDC2	chr15	-	81262802	81263000	81245277	81245377	81281919	81282219	4.88498e-14	1.06937e-09	0.601
ENSG00000267120.3	AD000671.6	chr19	-	36231280	36231465	36230152	36230527	36231924	36232129	8.4488e-14	1.54127e-09	0.237
ENSG00000101473.12	ACOT8	chr20	-	44482561	44482623	44477088	44477314	44483797	44483931	2.46458e-12	3.85373e-08	0.054
ENSG00000196437.6	ZNF569	chr19	-	37945735	37945975	37935808	37935866	37957988	37958131	4.44633e-12	5.40748e-08	0.395
ENSG00000073331.13	ALPK1	chr4	+	113223494	113223641	113218524	113218625	113298833	113299054	7.59004e-12	8.30768e-08	0.558
ENSG00000111247.10	RAD51AP1	chr12	+	4654947	4654998	4652928	4653077	4657257	4657341	1.78785e-11	1.77899e-07	-0.639
ENSG00000075711.16	DLG1	chr3	-	196802707	196802741	196793574	196793625	196803456	196803556	3.25912e-11	2.97272e-07	-0.682
ENSG00000125089.12	SH3TC1	chr4	+	8234433	8234792	8233702	8233883	8235089	8235240	4.52713e-11	3.16507e-07	-0.292
ENSG00000146192.10	FGD2	chr6	+	36981737	36981876	36980800	36981541	36982421	36982480	4.38739e-11	3.16507e-07	-0.237
ENSG00000126246.5	IGFLR1	chr19	-	36230610	36230987	36230157	36230527	36231924	36232124	5.65278e-11	3.63956e-07	0.17
ENSG00000051382.4	PIK3CB	chr3	-	138409841	138409985	138403466	138403645	138417748	138417937	7.35216e-11	4.47073e-07	0.361
ENSG00000111271.10	ACAD10	chr12	+	112128255	112128357	112125861	112126022	112130500	112130553	8.10586e-11	4.66962e-07	0.736
ENSG00000170571.7	EMB	chr5	-	49707030	49707055	49706710	49706799	49723977	49724061	8.86867e-11	4.8536e-07	0.059
ENSG00000075975.11	MKRN2	chr3	+	12610373	12610502	12598512	12598675	12611569	12611751	1.79865e-10	9.3748e-07	0.078
ENSG00000125726.6	CD70	chr19	-	6592426	6592586	6590113	6590147	6603951	6604114	2.32835e-10	1.10811e-06	0.368
ENSG00000267120.3	AD000671.6	chr19	-	36230610	36230989	36230152	36230527	36231924	36232129	3.677e-10	1.60986e-06	0.15
ENSG00000107104.14	KANK1	chr9	+	471448	471586	470591	470677	473193	473273	3.59383e-10	1.60986e-06	0.511
ENSG00000092199.13	HNRNPC	chr14	-	21736781	21736827	21731825	21731988	21737456	21737551	4.53728e-10	1.91011e-06	0.071
ENSG00000132142.15	ACACA	chr17	-	35702209	35702339	35696763	35696810	35722383	35722691	5.23194e-10	2.12097e-06	-0.426
ENSG00000145362.12	ANK2	chr4	+	114274200	114280455	114271383	114271405	114281978	114282053	8.83534e-10	3.27441e-06	-0.573
ENSG00000070501.7	POLB	chr8	+	42218613	42218720	42214837	42214910	42218812	42218883	8.59844e-10	3.27441e-06	-0.076
ENSG00000164338.5	UTP15	chr5	+	72863086	72863259	72861565	72861737	72864059	72864152	8.97467e-10	3.27441e-06	0.055
ENSG00000226688.2	ENTPD1-AS1	chr10	-	97782300	97782471	97781034	97781325	97786963	97787102	1.23007e-09	4.34313e-06	0.583
ENSG00000089006.12	SNX5	chr20	-	17949017	17949100	17937576	17937681	17949342	17949623	1.29229e-09	4.42022e-06	-0.058
ENSG00000070669.12	ASNS	chr7	-	97501030	97501308	97499089	97499125	97501662	97501720	1.62634e-09	5.23562e-06	-0.087
ENSG00000188493.10	C19orf54	chr19	-	41247977	41248094	41247695	41247769	41248481	41248675	1.73638e-09	5.27932e-06	-0.363
ENSG00000130038.5	EFCAB4B	chr12	-	3750897	3751004	3747289	3747623	3763377	3763389	1.7328e-09	5.27932e-06	-0.09
ENSG00000132142.15	ACACA	chr17	-	35567380	35567404	35564570	35564714	35578644	35578763	2.02019e-09	5.81894e-06	-0.08
ENSG00000143429.5	AC027612.6	chr2	-	91842945	91843023	91816786	91816979	91843393	91843404	2.14026e-09	6.00672e-06	0.47
ENSG00000196440.7	ARMCX4	chrX	+	100779190	100779419	100766011	100766042	100786630	100786999	2.32622e-09	6.3654e-06	0.767
ENSG00000111271.10	ACAD10	chr12	+	112128862	112128972	112125861	112126022	112130500	112130553	2.40695e-09	6.42567e-06	0.654
ENSG00000111801.11	BTN3A3	chr6	+	26448844	26448865	26448475	26448676	26448955	26448982	2.81761e-09	7.34288e-06	-0.387
ENSG00000135951.10	TSGA10	chr2	-	99735239	99735264	99735013	99735149	99743510	99743639	3.00464e-09	7.64821e-06	-0.75
ENSG00000152433.10	ZNF547	chr19	+	57882340	57882462	57879911	57879947	57883149	57883276	3.25371e-09	7.9141e-06	-0.135
ENSG00000197050.6	ZNF420	chr19	+	37579940	37580029	37571246	37571290	37618029	37618041	3.25277e-09	7.9141e-06	0.129
ENSG00000198498.5	TMA16	chr4	+	164436464	164436613	164435225	164435310	164438585	164438628	4.117e-09	9.62318e-06	0.099
ENSG00000197050.6	ZNF420	chr19	+	37581896	37582023	37571246	37571290	37618029	37618157	4.1322e-09	9.62318e-06	0.161
ENSG00000100889.7	PCK2	chr14	+	24568257	24568456	24567720	24567887	24568766	24568929	5.4008e-09	1.23155e-05	-0.095
ENSG00000198019.8	FCGR1B	chr1	-	120934380	120934606	120930038	120930293	120935447	120935468	5.92046e-09	1.3225e-05	0.307
ENSG00000073150.9	PANX2	chr22	+	50613860	50613911	50609189	50609385	50615367	50616831	6.13847e-09	1.34377e-05	0.557
ENSG00000169057.15	MECP2	chrX	-	153323849	153324017	153305242	153305354	153363060	153363120	7.7189e-09	1.65661e-05	-0.395
ENSG00000253203.2	GUSBP3	chr5	-	68941708	68941896	68938031	68938116	68974971	68975020	8.08131e-09	1.70104e-05	-0.133
ENSG00000142185.12	TRPM2	chr21	+	45846892	45846994	45846542	45846619	45855013	45855100	9.26311e-09	1.91301e-05	0.105
ENSG00000116337.11	AMPD2	chr1	+	110164806	110164975	110163773	110163888	110168283	110168414	1.07853e-08	2.18611e-05	-0.466
ENSG00000131002.7	TXLNG2P	chrY	+	21750428	21750536	21749367	21749393	21751406	21751498	1.10824e-08	2.2055e-05	0.149
ENSG00000140995.12	DEF8	chr16	+	90015824	90015921	90014332	90015222	90021576	90021674	1.20694e-08	2.35903e-05	0.345
ENSG00000119715.10	ESRRB	chr14	+	76873885	76873939	76776956	76777259	76905683	76906093	1.28477e-08	2.46709e-05	-0.601
ENSG00000141522.7	ARHGDIA	chr17	-	79826931	79826951	79826506	79826819	79827417	79827501	1.36159e-08	2.52598e-05	-0.503
ENSG00000001167.10	NFYA	chr6	+	41048549	41048636	41046767	41046903	41051784	41051931	1.80138e-08	3.28617e-05	-0.075
ENSG00000132793.7	LPIN3	chr20	+	39986521	39986597	39986000	39986087	39986876	39986991	1.87381e-08	3.29815e-05	-0.46
ENSG00000205702.6	CYP2D7P1	chr22	-	42537543	42537685	42537161	42537349	42537877	42538054	1.91601e-08	3.29815e-05	-0.451
ENSG00000156860.11	FBRS	chr16	+	30672500	30672536	30671583	30671763	30673740	30673789	1.89026e-08	3.29815e-05	-0.13
ENSG00000158411.6	MITD1	chr2	-	99787805	99787892	99786997	99787115	99787972	99788109	1.92848e-08	3.29815e-05	-0.087
ENSG00000074054.13	CLASP1	chr2	-	122160166	122160239	122159084	122159248	122161946	122162010	1.9844e-08	3.34157e-05	-0.536
ENSG00000143569.14	UBAP2L	chr1	+	154241837	154241888	154241232	154241430	154242675	154243040	2.1287e-08	3.3924e-05	-0.113
ENSG00000170889.9	RPS9	chr19	+	54710420	54710592	54705354	54705477	54711265	54711390	2.37819e-08	3.56581e-05	-0.1
ENSG00000205534.5	RP11-345J4.8	chr16	-	29576671	29576827	29572835	29572972	29577406	29577570	2.35169e-08	3.56581e-05	-0.081
ENSG00000120519.10	SLC10A7	chr4	-	147431064	147431201	147425000	147425076	147438189	147438272	2.28998e-08	3.56581e-05	-0.051
ENSG00000114867.15	EIF4G1	chr3	+	184033859	184034006	184032289	184032462	184035108	184035285	2.32406e-08	3.56581e-05	0.077
ENSG00000234492.4	RPL34-AS1	chr4	-	109529678	109529806	109523868	109524001	109541463	109541551	2.63006e-08	3.89018e-05	-0.402
ENSG00000137337.10	MDC1	chr6	-	30675342	30676134	30675160	30675231	30679188	30679281	2.96132e-08	4.26488e-05	0.122
ENSG00000198019.8	FCGR1B	chr1	-	120935447	120935468	120930038	120930293	120935863	120935876	3.08883e-08	4.39076e-05	-0.311
ENSG00000114867.15	EIF4G1	chr3	+	184033919	184034006	184032282	184032462	184035108	184035285	3.7315e-08	5.17002e-05	0.067
ENSG00000198019.8	FCGR1B	chr1	-	120934380	120934635	120930038	120930293	120935447	120935468	3.79854e-08	5.19712e-05	0.266
ENSG00000130958.7	SLC35D2	chr9	-	99107580	99107683	99106185	99106278	99113384	99113453	4.41976e-08	5.74324e-05	-0.142
ENSG00000100614.13	PPM1A	chr14	+	60733932	60734009	60716377	60716395	60735010	60735153	4.44912e-08	5.74324e-05	0.295
ENSG00000215908.5	CROCCP2	chr1	-	16969522	16969640	16959589	16959841	16971140	16971178	4.54414e-08	5.78347e-05	0.205
ENSG00000183323.8	CCDC125	chr5	-	68609811	68609870	68606944	68607031	68616291	68616407	4.65038e-08	5.85066e-05	0.1
ENSG00000213639.5	PPP1CB	chr2	+	29016728	29016863	29006772	29006844	29022064	29024514	4.8412e-08	5.95386e-05	-0.095
ENSG00000112739.12	PRPF4B	chr6	+	4061888	4061934	4060646	4061381	4062446	4062533	4.79932e-08	5.95386e-05	-0.081
ENSG00000075975.11	MKRN2	chr3	+	12610373	12610496	12598588	12598675	12611569	12611751	5.13894e-08	6.24981e-05	0.18
ENSG00000114026.17	OGG1	chr3	+	9800870	9800970	9798450	9798500	9807492	9808421	5.32917e-08	6.40993e-05	0.1
ENSG00000085982.9	USP40	chr2	-	234457746	234457875	234450913	234451009	234463025	234463172	5.62618e-08	6.69363e-05	-0.121
ENSG00000205885.3	C1RL-AS1	chr12	+	7271494	7271622	7267725	7267815	7272095	7272149	5.98994e-08	6.93577e-05	-0.271
ENSG00000132793.7	LPIN3	chr20	+	39986521	39986674	39986000	39986087	39986876	39986991	6.01981e-08	6.93577e-05	-0.265
ENSG00000164039.10	BDH2	chr4	-	104006505	104006619	104004027	104004086	104007636	104007697	6.41466e-08	7.23832e-05	-0.1
ENSG00000130844.12	ZNF331	chr19	+	54042469	54042536	54025870	54025938	54072557	54072639	6.88504e-08	7.38826e-05	-0.307
ENSG00000157077.10	ZFYVE9	chr1	+	52732326	52732503	52729444	52729544	52734134	52734304	6.62019e-08	7.38826e-05	-0.291
ENSG00000055917.11	PUM2	chr2	-	20531477	20531698	20527070	20527139	20550570	20550595	6.87338e-08	7.38826e-05	0.173
ENSG00000109390.7	NDUFC1	chr4	-	140217485	140217521	140216885	140217114	140222117	140222387	6.84926e-08	7.38826e-05	0.561
ENSG00000152380.5	FAM151B	chr5	+	79790871	79791102	79783804	79783967	79795703	79795804	7.13155e-08	7.57849e-05	-0.403
ENSG00000156860.11	FBRS	chr16	+	30672624	30672654	30671583	30671763	30673740	30673789	7.51071e-08	7.82938e-05	-0.086
ENSG00000175224.12	ATG13	chr11	+	46642609	46642707	46639084	46639440	46646850	46646967	7.72224e-08	7.97395e-05	-0.112
ENSG00000130023.11	ERMARD	chr6	+	170176550	170176769	170175973	170176161	170179277	170179391	7.85976e-08	8.04009e-05	-0.081
ENSG00000205702.6	CYP2D7P1	chr22	-	42537634	42537685	42537161	42537349	42537877	42537934	8.30147e-08	8.41331e-05	-0.426
ENSG00000162616.8	DNAJB4	chr1	+	78458437	78458550	78444964	78445303	78478734	78479198	9.42326e-08	9.4626e-05	-0.518
ENSG00000160055.15	TMEM234	chr1	-	32687467	32687619	32686731	32686798	32687907	32687926	1.09115e-07	0.000105692	-0.112
ENSG00000242588.2	RP11-274B21.1	chr7	+	128218943	128218987	128173698	128173784	128220052	128220148	1.08677e-07	0.000105692	-0.083
ENSG00000072071.12	LPHN1	chr19	-	14275432	14275517	14273759	14274218	14277827	14277842	1.1061e-07	0.0001062	-0.301
ENSG00000161912.13	ADCY10P1	chr6	+	41086662	41086846	41085867	41085923	41088261	41088396	1.11817e-07	0.000106371	0.331
ENSG00000055917.11	PUM2	chr2	-	20532727	20532824	20527070	20527139	20550570	20550595	1.18063e-07	0.00011045	0.286
ENSG00000135341.13	MAP3K7	chr6	-	91228165	91228281	91223291	91226400	91228976	91229038	1.26051e-07	0.000116923	-0.055
ENSG00000074370.13	ATP2A3	chr17	-	3856986	3857004	3854874	3854979	3867467	3867530	1.33225e-07	0.000118521	-0.127
ENSG00000242588.2	RP11-274B21.1	chr7	+	128214773	128214845	128173698	128173784	128220052	128220148	1.34271e-07	0.000118521	-0.097
ENSG00000066044.9	ELAVL1	chr19	-	8038442	8038509	8028513	8028691	8038608	8038762	1.33349e-07	0.000118521	0.204
ENSG00000143248.8	RGS5	chr1	-	163278333	163278421	163276022	163276119	163291411	163291577	1.38253e-07	0.000120099	0.228
ENSG00000226674.4	TEX41	chr2	+	145429168	145429231	145425578	145425675	145525664	145525847	1.67243e-07	0.000141904	-0.308
ENSG00000125447.12	GGA3	chr17	-	73234062	73234171	73233616	73233891	73234732	73234843	1.70138e-07	0.00014325	0.206
ENSG00000131018.18	SYNE1	chr6	-	152466621	152466690	152464757	152464900	152469179	152469513	1.83676e-07	0.000153467	-0.222
ENSG00000076864.15	RAP1GAP	chr1	-	21976253	21976289	21952796	21952890	21991703	21991810	2.13013e-07	0.000172706	-0.139
ENSG00000186654.16	PRR5	chr22	+	45127614	45127701	45122456	45122514	45132651	45133321	2.16659e-07	0.000172839	-0.635
ENSG00000133030.15	MPRIP	chr17	+	17067422	17071229	17064553	17064670	17075031	17075179	2.15746e-07	0.000172839	-0.084
ENSG00000164896.15	FASTK	chr7	-	150773999	150774114	150773710	150773919	150774396	150774488	2.22798e-07	0.000175441	-0.07
ENSG00000007341.14	ST7L	chr1	-	113159434	113159466	113153462	113153625	113161530	113161749	2.38141e-07	0.000185734	0.129
ENSG00000089486.12	CDIP1	chr16	-	4586440	4586769	4564575	4564665	4588325	4588405	2.39263e-07	0.000185734	0.245
ENSG00000055070.12	SZRD1	chr1	+	16717044	16717121	16713549	16713620	16717869	16717919	2.43288e-07	0.000187529	0.234
ENSG00000143537.9	ADAM15	chr1	+	155033893	155033965	155033238	155033308	155034379	155034451	2.47225e-07	0.000189231	-0.198
ENSG00000141391.9	SLMO1	chr18	+	12410716	12410857	12407943	12408006	12420323	12420492	2.58085e-07	0.000195381	-0.231
ENSG00000242349.1	NPPA-AS1	chr1	+	11903760	11904130	11901073	11901264	11905603	11905823	2.5883e-07	0.000195381	0.216
ENSG00000155229.16	MMS19	chr10	-	99228008	99228163	99227261	99227340	99229402	99229480	2.61314e-07	0.000195905	-0.053
ENSG00000271147.3	RP4-769N13.6	chrX	+	101968709	101968777	101860409	101860581	101969116	101969127	2.78512e-07	0.000207109	-0.251
ENSG00000155744.5	FAM126B	chr2	-	201926029	201926147	201888681	201888762	201936332	201936394	2.85627e-07	0.000209821	0.572
ENSG00000105662.11	CRTC1	chr19	+	18882251	18882356	18879294	18879603	18886450	18886631	2.88704e-07	0.000210667	-0.079
ENSG00000155666.7	KDM8	chr16	+	27226196	27226329	27221413	27221942	27227265	27227310	2.98886e-07	0.000216653	-0.138
ENSG00000105662.11	CRTC1	chr19	+	18885709	18885796	18879294	18879603	18886450	18886631	3.01058e-07	0.000216791	-0.079
ENSG00000121903.10	ZSCAN20	chr1	+	33954714	33954791	33954064	33954251	33955117	33955202	3.10478e-07	0.000222114	-0.211
ENSG00000206149.6	HERC2P9	chr15	+	28900640	28900837	28900418	28900566	28900941	28901172	3.21898e-07	0.000225855	-0.142
ENSG00000259972.1	AC009120.6	chr16	-	74340152	74340319	74339153	74339478	74366464	74366511	3.21645e-07	0.000225855	0.322
ENSG00000155229.16	MMS19	chr10	-	99228722	99228861	99227261	99227340	99229402	99229480	3.29638e-07	0.000226921	-0.069
ENSG00000068354.11	TBC1D25	chrX	+	48399672	48399830	48398185	48398308	48417545	48417672	3.29183e-07	0.000226921	0.495
ENSG00000158402.14	CDC25C	chr5	-	137625168	137625252	137622857	137622956	137627658	137627803	3.34929e-07	0.0002277	-0.408
ENSG00000115194.6	SLC30A3	chr2	-	27480772	27480926	27480021	27480220	27481028	27481175	3.39872e-07	0.000228225	-0.256
ENSG00000131269.11	ABCB7	chrX	-	74334588	74334669	74332720	74332807	74375939	74376107	3.3814e-07	0.000228225	-0.052
ENSG00000134910.8	STT3A	chr11	+	125463532	125463620	125462730	125462813	125466953	125467014	3.43689e-07	0.000229381	0.153
ENSG00000163975.7	MFI2	chr3	-	196754626	196754781	196753530	196753630	196756524	196756658	3.5683e-07	0.000231926	-0.074
ENSG00000040275.12	SPDL1	chr5	+	169014202	169014376	169011091	169011170	169015397	169015579	3.52626e-07	0.000231926	0.143
ENSG00000069493.10	CLEC2D	chr12	+	9832785	9832847	9821232	9821391	9833518	9833629	3.57052e-07	0.000231926	0.595
ENSG00000179348.7	GATA2	chr3	-	128210846	128211065	128205850	128205919	128211741	128212016	3.63022e-07	0.000232366	-0.484
ENSG00000100031.14	GGT1	chr22	+	25003920	25003990	24999113	24999494	25006324	25006498	3.71413e-07	0.000235975	-0.139
ENSG00000167562.7	ZNF701	chr19	+	53075489	53075621	53073553	53073583	53077329	53077415	3.75128e-07	0.000235975	-0.084
ENSG00000214022.7	REPIN1	chr7	+	150066759	150066957	150065878	150066030	150068316	150068481	3.74839e-07	0.000235975	0.112
ENSG00000119636.11	CCDC176	chr14	+	74489618	74489847	74486058	74486237	74495886	74495952	3.78796e-07	0.00023692	-0.4
ENSG00000157045.4	NTAN1	chr16	-	15141853	15141956	15141711	15141777	15149747	15149921	3.91302e-07	0.000243352	0.084
ENSG00000168214.16	RBPJ	chr4	+	26322321	26322437	26321307	26321510	26387974	26388013	3.9508e-07	0.000244313	-0.128
ENSG00000171509.11	RXFP1	chr4	+	159533442	159533514	159533281	159533353	159538282	159538357	4.06955e-07	0.000250243	0.051
ENSG00000178852.11	EFCAB13	chr17	+	45438743	45438887	45422381	45422464	45447802	45447874	4.09857e-07	0.00025062	0.185
ENSG00000168255.14	POLR2J3	chr7	-	102207443	102208631	102181947	102182109	102210281	102210371	4.43639e-07	0.000266805	0.161
ENSG00000184465.11	WDR27	chr6	-	170068077	170068281	170064261	170064382	170072350	170072492	4.47863e-07	0.000267873	-0.108
ENSG00000267278.1	MAP3K14-AS1	chr17	+	43332504	43332585	43325320	43325370	43344479	43344695	4.6412e-07	0.000276088	0.26
ENSG00000106070.13	GRB10	chr7	-	50795489	50795587	50742132	50742355	50823583	50823761	4.66822e-07	0.000276194	0.467
ENSG00000181027.6	FKRP	chr19	+	47250490	47250562	47249313	47249347	47251283	47251345	4.73973e-07	0.000278918	-0.669
ENSG00000176261.11	ZBTB8OS	chr1	-	33100368	33100393	33093108	33093145	33116002	33116126	4.911e-07	0.000285922	0.283
ENSG00000204524.5	ZNF805	chr19	+	57755290	57755417	57752259	57752289	57759972	57760068	5.10684e-07	0.000292654	-0.068
ENSG00000081760.12	AACS	chr12	+	125603186	125603311	125599022	125599103	125618548	125618618	5.39581e-07	0.000307603	-0.08
ENSG00000196296.9	ATP2A1	chr16	+	28903635	28903980	28900217	28900274	28905475	28905540	5.44079e-07	0.00030856	-0.369
ENSG00000090554.8	FLT3LG	chr19	+	49983554	49983733	49979679	49979823	49989271	49989286	5.48293e-07	0.000309347	-0.272
ENSG00000075702.12	WDR62	chr19	+	36581346	36581422	36580086	36580208	36583590	36583713	5.58351e-07	0.000310225	-0.055
ENSG00000040275.12	SPDL1	chr5	+	169014264	169014376	169011091	169011170	169015397	169015579	5.56688e-07	0.000310225	0.186
ENSG00000167261.9	DPEP2	chr16	-	68021754	68021960	68021299	68021663	68023225	68023301	5.53864e-07	0.000310225	0.238
ENSG00000015153.10	YAF2	chr12	-	42604349	42604421	42555414	42555567	42631956	42632105	5.65739e-07	0.000312742	-0.448
ENSG00000188641.8	DPYD	chr1	-	98186380	98186482	98165745	98165858	98187065	98187210	5.72499e-07	0.000314889	-0.515
ENSG00000167524.10	SGK494	chr17	-	26938160	26938271	26937015	26937717	26938561	26938674	5.93986e-07	0.000323456	-0.4
ENSG00000188493.10	C19orf54	chr19	-	41247598	41247769	41246760	41247344	41248419	41248675	6.22669e-07	0.000337397	0.13
ENSG00000104081.9	BMF	chr15	-	40400459	40400587	40398558	40398639	40400973	40401075	6.43326e-07	0.00034454	0.125
ENSG00000131051.16	RBM39	chr20	-	34328446	34328519	34326889	34326939	34328745	34328809	6.53611e-07	0.000347286	-0.064
ENSG00000197619.9	ZNF615	chr19	-	52507669	52508102	52507101	52507153	52510545	52510583	6.69376e-07	0.000352243	-0.408
ENSG00000177873.8	ZNF619	chr3	+	40523720	40523840	40523353	40523507	40524078	40524195	6.73415e-07	0.000352673	0.066
ENSG00000155085.11	AK9	chr6	-	109940294	109940439	109935587	109935683	109962720	109962819	6.93843e-07	0.000359359	-0.208
ENSG00000260565.2	ERVK13-1	chr16	-	2719411	2719562	2713082	2713408	2721345	2721406	6.92055e-07	0.000359359	-0.174
ENSG00000113916.13	BCL6	chr3	-	187444518	187444686	187443286	187443417	187446147	187446332	6.96032e-07	0.000359359	0.307
ENSG00000176261.11	ZBTB8OS	chr1	-	33099551	33099673	33093108	33093145	33116002	33116126	7.04572e-07	0.000362061	0.29
ENSG00000148180.12	GSN	chr9	+	124044716	124044828	124043747	124043840	124062342	124062404	7.12693e-07	0.000362827	-0.338
ENSG00000104529.13	EEF1D	chr8	-	144674816	144674830	144671160	144672251	144679024	144679551	7.12086e-07	0.000362827	0.605
ENSG00000156026.10	MCU	chr10	+	74496242	74496329	74475611	74475660	74594116	74594178	7.29833e-07	0.000368128	0.145
ENSG00000127452.4	FBXL12	chr19	-	9924813	9925018	9921983	9922393	9929429	9929755	7.38453e-07	0.000370768	-0.129
ENSG00000196209.8	SIRPB2	chr20	-	1457982	1458048	1454436	1454515	1458910	1459252	7.45716e-07	0.000372024	-0.091
ENSG00000179818.9	PCBP1-AS1	chr2	-	70310638	70310819	70282845	70283042	70312678	70312756	7.47753e-07	0.000372024	0.127
ENSG00000138674.12	SEC31A	chr4	-	83783686	83783725	83778841	83778917	83784470	83784545	7.61597e-07	0.000375202	-0.062
ENSG00000115568.11	ZNF142	chr2	-	219523702	219523853	219523423	219523524	219524091	219524199	7.71302e-07	0.000376116	0.094
ENSG00000140368.8	PSTPIP1	chr15	+	77324638	77324769	77323520	77323619	77327848	77327904	7.73159e-07	0.000376116	0.165
ENSG00000163374.15	YY1AP1	chr1	-	155657861	155657992	155650172	155650247	155658449	155658477	7.83032e-07	0.000379233	-0.062
ENSG00000096968.8	JAK2	chr9	+	4985939	4986022	4985244	4985630	5021962	5022065	8.01136e-07	0.000386292	-0.059
ENSG00000172244.4	C5orf34	chr5	-	43502473	43502597	43494611	43494703	43503766	43503862	8.45856e-07	0.000406066	0.099
ENSG00000105983.15	LMBR1	chr7	-	156626446	156626486	156589082	156589186	156685621	156685873	8.51961e-07	0.000407212	-0.369
ENSG00000122033.10	MTIF3	chr13	-	28019224	28019293	28009775	28010030	28024645	28024711	8.584e-07	0.000408505	-0.29
ENSG00000064115.6	TM7SF3	chr12	-	27156168	27156323	27149674	27149795	27167010	27167317	8.85717e-07	0.00041968	-0.07
ENSG00000175048.12	ZDHHC14	chr6	+	158049479	158049518	158014040	158014178	158053865	158053914	9.1304e-07	0.000425264	-0.159
ENSG00000147601.9	TERF1	chr8	+	73942570	73942630	73939174	73939287	73944276	73944368	9.13042e-07	0.000425264	-0.116
ENSG00000161040.12	FBXL13	chr7	-	102669046	102669195	102667895	102668005	102669797	102669865	9.08175e-07	0.000425264	0.397
ENSG00000188690.8	UROS	chr10	-	127481147	127481313	127477293	127477574	127482590	127482957	9.25135e-07	0.000429071	-0.259
ENSG00000175048.12	ZDHHC14	chr6	+	158049380	158049518	158014019	158014178	158053865	158053914	9.60566e-07	0.00044298	-0.082
ENSG00000197619.9	ZNF615	chr19	-	52507669	52507976	52506949	52507153	52510545	52510583	9.8052e-07	0.00044905	-0.423
ENSG00000161642.13	ZNF385A	chr12	-	54765256	54765426	54764710	54764880	54767756	54767919	9.88852e-07	0.000450979	0.081
ENSG00000138658.11	C4orf21	chr4	-	113469408	113469536	113462247	113462424	113474990	113475138	1.00102e-06	0.000454634	0.101
ENSG00000198715.7	C1orf85	chr1	-	156264549	156264807	156264155	156264356	156265316	156265445	1.01681e-06	0.000459897	0.101
ENSG00000184465.11	WDR27	chr6	-	170065581	170065652	170064261	170064382	170072350	170072492	1.08203e-06	0.000485383	-0.243
ENSG00000171502.10	COL24A1	chr1	-	86372876	86372930	86362038	86362092	86374280	86374334	1.08018e-06	0.000485383	-0.066
ENSG00000183077.11	AFMID	chr17	+	76201683	76201819	76201520	76201599	76202991	76203133	1.11172e-06	0.000496666	0.211
ENSG00000180098.5	TRNAU1AP	chr1	+	28887624	28887772	28887144	28887244	28887857	28887910	1.16236e-06	0.000515085	-0.059
ENSG00000114956.15	DGUOK	chr2	+	74166036	74166149	74159724	74159810	74185272	74185372	1.19636e-06	0.000528014	0.468
ENSG00000175048.12	ZDHHC14	chr6	+	158049380	158049406	158014019	158014178	158053865	158053914	1.20331e-06	0.000528951	-0.255
ENSG00000148288.7	GBGT1	chr9	-	136031401	136031489	136031287	136031323	136036853	136036919	1.29806e-06	0.000563808	-0.069
ENSG00000168067.7	MAP4K2	chr11	-	64568371	64568503	64568235	64568298	64568582	64568655	1.33462e-06	0.00057063	-0.081
ENSG00000181982.13	CCDC149	chr4	-	24896613	24896740	24878157	24878319	24981690	24981770	1.33207e-06	0.00057063	0.177
ENSG00000166169.12	POLL	chr10	-	103345618	103345913	103345072	103345235	103347002	103347139	1.35524e-06	0.000574952	-0.061
ENSG00000189050.10	RNFT1	chr17	-	58037428	58037529	58035651	58035805	58040187	58040327	1.35393e-06	0.000574952	0.21
ENSG00000185658.9	BRWD1	chr21	-	40685166	40685225	40684766	40684826	40685368	40685496	1.38252e-06	0.000582027	-0.073
ENSG00000159556.5	ISL2	chr15	+	76630592	76630855	76629778	76630308	76632616	76632900	1.38255e-06	0.000582027	-0.07
ENSG00000245573.3	BDNF-AS	chr11	+	27696843	27697687	27680717	27680775	27698528	27699354	1.40048e-06	0.000587317	0.175
ENSG00000099330.4	OCEL1	chr19	+	17338648	17338814	17337501	17338008	17339064	17339118	1.45401e-06	0.000607436	-0.075
ENSG00000196391.6	ZNF774	chr15	+	90897873	90897996	90895476	90895643	90902082	90902189	1.49773e-06	0.000620961	-0.22
ENSG00000130844.12	ZNF331	chr19	+	54059098	54059162	54025870	54025938	54072557	54072639	1.49441e-06	0.000620961	-0.165
ENSG00000119688.16	ABCD4	chr14	-	74763035	74763152	74761850	74761901	74769577	74769613	1.52153e-06	0.000628448	-0.332
ENSG00000155085.11	AK9	chr6	-	109954386	109954526	109935587	109935683	109962720	109962819	1.57934e-06	0.000649874	-0.205
ENSG00000111271.10	ACAD10	chr12	+	112167609	112167760	112159474	112159543	112174634	112174808	1.60506e-06	0.000655528	-0.174
ENSG00000162616.8	DNAJB4	chr1	+	78458437	78458550	78444915	78444977	78478734	78479198	1.60279e-06	0.000655528	-0.1
ENSG00000124731.8	TREM1	chr6	-	41248698	41248891	41242941	41243968	41250132	41250489	1.61807e-06	0.000655949	-0.368
ENSG00000158092.2	NCK1	chr3	+	136607920	136608143	136586272	136586367	136646825	136647069	1.62438e-06	0.000656076	-0.206
ENSG00000140368.8	PSTPIP1	chr15	+	77325202	77325293	77323520	77323619	77327848	77327904	1.65113e-06	0.00066443	0.114
ENSG00000100031.14	GGT1	chr22	+	25005931	25006000	24999181	24999494	25006324	25006498	1.73012e-06	0.000693665	-0.125
ENSG00000112039.3	FANCE	chr6	+	35428328	35428395	35427458	35427537	35434020	35434880	1.77869e-06	0.000709165	-0.123
ENSG00000123146.15	CD97	chr19	+	14512464	14512572	14508873	14508951	14515194	14515374	1.79159e-06	0.000710502	-0.374
ENSG00000179818.9	PCBP1-AS1	chr2	-	70310669	70310819	70282845	70283042	70312678	70312705	1.80431e-06	0.000712961	0.115
ENSG00000080345.13	RIF1	chr2	+	152351742	152351840	152339712	152339849	152354299	152354727	1.86775e-06	0.000722108	-0.448
ENSG00000140398.9	NEIL1	chr15	+	75644451	75644571	75641224	75641680	75644664	75644728	1.87364e-06	0.000722108	-0.286
ENSG00000092148.8	HECTD1	chr14	-	31583082	31583265	31582482	31582690	31583491	31583546	1.86066e-06	0.000722108	-0.08
ENSG00000028203.13	VEZT	chr12	+	95617955	95618012	95611585	95611662	95635939	95636090	1.84298e-06	0.000722108	0.203
ENSG00000179818.9	PCBP1-AS1	chr2	-	70286774	70286812	70282787	70283042	70312678	70312756	1.85652e-06	0.000722108	0.229
ENSG00000172785.14	CBWD1	chr9	-	177722	177820	175697	175784	185882	186011	1.89465e-06	0.000727645	-0.12
ENSG00000148737.11	TCF7L2	chr10	+	114919678	114919751	114917779	114917828	114920377	114920420	2.00577e-06	0.000767627	0.54
ENSG00000198561.8	CTNND1	chr11	+	57581782	57581845	57578870	57578958	57582865	57582972	2.04507e-06	0.000773511	-0.066
ENSG00000204852.11	TCTN1	chr12	+	111065856	111066029	111064166	111064297	111066571	111066723	2.04088e-06	0.000773511	-0.065
ENSG00000028310.13	BRD9	chr5	-	869152	869234	868721	868919	870587	870668	2.03438e-06	0.000773511	0.426
ENSG00000177406.4	RP11-218M22.1	chr12	+	741674	741782	740056	740151	750009	750190	2.06822e-06	0.000777927	-0.522
ENSG00000103005.7	USB1	chr16	+	58048176	58048198	58043832	58044016	58051237	58051343	2.17908e-06	0.000814032	-0.149
ENSG00000132549.14	VPS13B	chr8	+	100519364	100519431	100515063	100515178	100523331	100523740	2.19121e-06	0.000815779	-0.054
ENSG00000063978.11	RNF4	chr4	+	2472713	2472836	2470907	2470985	2498733	2498830	2.2569e-06	0.000837386	-0.34
ENSG00000131051.16	RBM39	chr20	-	34317383	34317473	34317233	34317287	34319862	34320057	2.30569e-06	0.000852599	-0.078
ENSG00000197694.9	SPTAN1	chr9	+	131371929	131371944	131371400	131371563	131373992	131374124	2.43343e-06	0.00089225	-0.053
ENSG00000132670.16	PTPRA	chr20	+	2903852	2903931	2854134	2854406	2944917	2944996	2.49306e-06	0.000907898	0.065
ENSG00000198185.7	ZNF334	chr20	-	45140720	45140779	45133252	45133379	45141178	45142198	2.50171e-06	0.000907898	0.191
ENSG00000174885.8	NLRP6	chr11	+	279833	279872	279326	279607	280083	281839	2.51616e-06	0.000908932	-0.178
ENSG00000109065.7	NAT9	chr17	-	72770004	72770078	72769714	72769824	72771737	72771846	2.56092e-06	0.000910083	-0.249
ENSG00000169241.13	SLC50A1	chr1	+	155109303	155109427	155108774	155108872	155110454	155110574	2.52771e-06	0.000910083	-0.219
ENSG00000086758.11	HUWE1	chrX	-	53590706	53590782	53587148	53587377	53592027	53592200	2.54387e-06	0.000910083	-0.194
ENSG00000068354.11	TBC1D25	chrX	+	48403256	48403411	48397844	48398308	48417545	48417734	2.55584e-06	0.000910083	0.198
ENSG00000250903.4	GMDS-AS1	chr6	+	2269931	2270033	2263834	2263918	2272049	2273651	2.57884e-06	0.000913487	0.16
ENSG00000250337.1	LINC01021	chr5	+	27489388	27489493	27475641	27475802	27494341	27494425	2.70392e-06	0.000945552	-0.52
ENSG00000189308.6	LIN54	chr4	-	83900035	83900159	83867410	83867627	83905976	83906029	2.74995e-06	0.000958587	-0.155
ENSG00000137210.9	TMEM14B	chr6	+	10770309	10770437	10749854	10749931	10829239	10829398	2.80126e-06	0.00097337	-0.191
ENSG00000138658.11	C4orf21	chr4	-	113468440	113468564	113462247	113462424	113474990	113475138	2.81016e-06	0.000973374	0.073
ENSG00000119139.12	TJP2	chr9	+	71865950	71866280	71862927	71863140	71867730	71867816	2.88853e-06	0.000997363	-0.096
ENSG00000138640.10	FAM13A	chr4	-	89930101	89930229	89912123	89912301	89941610	89941820	3.01801e-06	0.00103879	0.223
ENSG00000151148.9	UBE3B	chr12	+	109919441	109919547	109915206	109915569	109921335	109921517	3.04305e-06	0.00104014	-0.058
ENSG00000088298.8	EDEM2	chr20	-	33722540	33722752	33719444	33719586	33725682	33725808	3.05043e-06	0.00104014	0.054
ENSG00000105750.10	ZNF85	chr19	+	21127057	21127102	21117775	21117853	21129105	21129146	3.0342e-06	0.00104014	0.441
ENSG00000233038.1	AC011899.9	chr7	+	157649981	157650240	157648618	157648822	157655236	157658784	3.09653e-06	0.00105106	-0.202
ENSG00000142082.10	SIRT3	chr11	-	233342	233486	233208	233215	236047	236326	3.10167e-06	0.00105106	-0.07
ENSG00000135241.12	PNPLA8	chr7	-	108161919	108161965	108154879	108155891	108166472	108166568	3.21477e-06	0.00108268	-0.145
ENSG00000267278.1	MAP3K14-AS1	chr17	+	43332501	43332585	43325291	43325370	43344479	43344695	3.28427e-06	0.0011027	0.207
ENSG00000245573.3	BDNF-AS	chr11	+	27697123	27697687	27680717	27680775	27698528	27698686	3.32801e-06	0.00111184	0.146
ENSG00000117543.15	DPH5	chr1	-	101490864	101491022	101487196	101487321	101491220	101491311	3.37749e-06	0.00112366	0.102
ENSG00000214954.4	LRRC69	chr8	+	92147895	92147967	92145337	92145533	92201749	92201851	3.47387e-06	0.00115063	-0.295
ENSG00000131374.10	TBC1D5	chr3	-	17560393	17560487	17549965	17550097	17617905	17618041	3.53755e-06	0.00115668	0.131
ENSG00000131374.10	TBC1D5	chr3	-	17616694	17616802	17550040	17550097	17617905	17618041	3.54017e-06	0.00115668	0.383
ENSG00000151779.8	NBAS	chr2	-	15319111	15319240	15307031	15307447	15326865	15327004	3.5925e-06	0.00116458	-0.079
ENSG00000142082.10	SIRT3	chr11	-	233342	233437	232982	233215	236047	236330	3.59626e-06	0.00116458	-0.07
ENSG00000076685.14	NT5C2	chr10	-	104860508	104860700	104859682	104859776	104860801	104860859	3.58817e-06	0.00116458	-0.065
ENSG00000046651.10	OFD1	chrX	+	13770822	13771560	13769367	13769487	13774696	13774886	3.68467e-06	0.00118969	-0.132
ENSG00000006025.7	OSBPL7	chr17	-	45897094	45897148	45896351	45896465	45897336	45897462	3.76419e-06	0.00121179	0.105
ENSG00000162769.8	FLVCR1	chr1	+	213037066	213037211	213031596	213032532	213046019	213046160	3.81043e-06	0.00122308	0.058
ENSG00000167578.12	RAB4B	chr19	+	41286289	41286404	41284120	41284296	41292569	41292665	3.83607e-06	0.00122771	0.087
ENSG00000179818.9	PCBP1-AS1	chr2	-	70304432	70304513	70282748	70283042	70310669	70310819	3.88542e-06	0.00123988	0.48
ENSG00000149554.8	CHEK1	chr11	+	125496311	125496470	125495901	125495924	125496643	125496728	3.93454e-06	0.00124828	-0.284
ENSG00000007341.14	ST7L	chr1	-	113124613	113124728	113120966	113121039	113124996	113125094	4.05851e-06	0.00128018	-0.081
ENSG00000182718.12	ANXA2	chr15	-	60688478	60688626	60685295	60685639	60689456	60689537	4.05643e-06	0.00128018	0.18
ENSG00000073792.11	IGF2BP2	chr3	-	185414399	185414451	185407142	185407415	185540940	185541001	4.08739e-06	0.00128191	-0.629
ENSG00000125454.7	SLC25A19	chr17	-	73284582	73284672	73282384	73282540	73285169	73285441	4.21125e-06	0.00131698	0.371
ENSG00000183963.14	SMTN	chr22	+	31476435	31476740	31460103	31460173	31479164	31479295	4.24913e-06	0.00132504	0.185
ENSG00000130844.12	ZNF331	chr19	+	54042469	54042536	54025870	54025938	54059098	54059106	4.2869e-06	0.00133004	-0.07
ENSG00000104325.2	DECR1	chr8	+	91018263	91018505	91017675	91018073	91029351	91029554	4.40245e-06	0.00135847	-0.107
ENSG00000131127.9	ZNF141	chr4	+	337570	337697	331608	331775	366452	366796	4.40598e-06	0.00135847	0.203
ENSG00000083290.15	ULK2	chr17	-	19685201	19685380	19684298	19684417	19687009	19687218	4.58532e-06	0.00140192	-0.098
ENSG00000023330.10	ALAS1	chr3	+	52232687	52232864	52232109	52232271	52233225	52233456	4.69277e-06	0.00143077	0.067
ENSG00000271853.1	RP1-178F15.5	chr1	-	153599958	153600074	153598807	153599009	153603486	153603554	4.72365e-06	0.00143619	0.257
ENSG00000104231.6	ZFAND1	chr8	-	82629483	82629523	82627221	82627349	82630416	82630459	4.85012e-06	0.00147055	-0.101
ENSG00000163870.10	TPRA1	chr3	-	127298582	127298715	127295458	127295539	127309252	127309435	4.98084e-06	0.00149357	-0.15
ENSG00000141505.7	ASGR1	chr17	-	7080528	7080645	7080299	7080395	7081812	7081907	4.98115e-06	0.00149357	0.643
ENSG00000231365.1	RP11-418J17.1	chr1	+	119804069	119804339	119693187	119693369	119805524	119805567	5.37557e-06	0.00159887	0.445
ENSG00000167380.12	ZNF226	chr19	+	44671971	44672013	44669909	44669960	44673717	44673781	5.39221e-06	0.00159947	-0.461
ENSG00000168002.7	POLR2G	chr11	+	62530013	62530338	62529266	62529376	62532653	62532704	5.6538e-06	0.00166792	0.11
ENSG00000166743.5	ACSM1	chr16	-	20636744	20636844	20635417	20635537	20638577	20638638	5.81922e-06	0.00169852	-0.614
ENSG00000026508.12	CD44	chr11	+	35226058	35226187	35223214	35223334	35236398	35236461	5.8414e-06	0.00170045	-0.169
ENSG00000164989.11	CCDC171	chr9	+	15874529	15874661	15848890	15848945	15920267	15920420	5.90177e-06	0.00170443	-0.199
ENSG00000173889.11	PHC3	chr3	-	169863210	169863309	169846471	169847340	169889160	169889238	5.89442e-06	0.00170443	0.253
ENSG00000196535.10	MYO18A	chr17	-	27451670	27451706	27449183	27449271	27452910	27452985	5.87795e-06	0.00170443	0.411
ENSG00000176261.11	ZBTB8OS	chr1	-	33099551	33099673	33097427	33097480	33116033	33116126	5.97701e-06	0.00171688	-0.239
ENSG00000134470.15	IL15RA	chr10	-	6008107	6008302	6002329	6002530	6019739	6020001	5.99193e-06	0.00171688	-0.171
ENSG00000083093.5	PALB2	chr16	-	23649779	23649913	23649390	23649450	23652430	23652622	5.96658e-06	0.00171688	0.055
ENSG00000198208.7	RPS6KL1	chr14	-	75375803	75375893	75375552	75375635	75376245	75376851	6.05556e-06	0.00172333	-0.228
ENSG00000005108.11	THSD7A	chr7	-	11416196	11416284	11409983	11415505	11418696	11418907	6.06207e-06	0.00172333	-0.105
ENSG00000182718.12	ANXA2	chr15	-	60686772	60686894	60678226	60678285	60688478	60688626	6.03132e-06	0.00172333	0.594
ENSG00000121903.10	ZSCAN20	chr1	+	33958786	33959215	33956624	33957302	33959817	33962107	6.09496e-06	0.00172384	-0.09
ENSG00000143537.9	ADAM15	chr1	+	155033890	155033965	155033238	155033308	155034379	155034451	6.16151e-06	0.00172483	-0.16
ENSG00000172954.9	LCLAT1	chr2	+	30699267	30699501	30670138	30670249	30755981	30756180	6.14704e-06	0.00172483	0.501
ENSG00000238083.3	LRRC37A2	chr17	+	44623620	44623739	44618172	44618247	44625677	44627209	6.32058e-06	0.00176283	-0.306
ENSG00000154358.15	OBSCN	chr1	+	228487582	228487846	228486154	228486418	228491375	228491639	6.34791e-06	0.00176348	-0.353
ENSG00000175449.9	RFESD	chr5	+	94990036	94990071	94989764	94989940	94991749	94991894	6.40233e-06	0.00177409	-0.242
ENSG00000134910.8	STT3A	chr11	+	125463532	125463620	125462730	125462813	125472197	125472319	6.55143e-06	0.00180172	0.625
ENSG00000198707.10	CEP290	chr12	-	88509254	88509347	88508874	88508959	88510809	88510922	6.70591e-06	0.00183499	0.094
ENSG00000048028.7	USP28	chr11	-	113702641	113702711	113701588	113701665	113704141	113704279	6.8832e-06	0.00186948	-0.202
ENSG00000213639.5	PPP1CB	chr2	+	29011523	29011675	29006772	29006844	29022064	29024514	6.91082e-06	0.00187234	-0.097
ENSG00000137500.5	CCDC90B	chr11	-	82996169	82996254	82985681	82985783	82996915	82997022	7.04228e-06	0.00190324	0.47
ENSG00000198208.7	RPS6KL1	chr14	-	75374137	75374233	75372345	75373827	75375552	75375635	7.08098e-06	0.00190789	-0.105
ENSG00000183011.9	LSMD1	chr17	-	7761949	7762149	7761566	7761814	7786552	7786653	7.09435e-06	0.00190789	0.135
ENSG00000007866.14	TEAD3	chr6	-	35447836	35447899	35447081	35447093	35452336	35452401	7.2454e-06	0.00194374	-0.442
ENSG00000141568.15	FOXK2	chr17	+	80543127	80543147	80540650	80540810	80543779	80543919	7.27335e-06	0.00194647	0.198
ENSG00000205309.9	NT5M	chr17	+	17207677	17207795	17206703	17207131	17209856	17209957	7.33414e-06	0.00195391	-0.217
ENSG00000046651.10	OFD1	chrX	+	13781863	13781974	13780462	13780563	13785245	13785403	7.33688e-06	0.00195391	-0.093
ENSG00000137393.8	RNF144B	chr6	+	18459837	18459982	18439914	18439975	18463521	18463611	7.63028e-06	0.00202712	0.535
ENSG00000101247.13	NDUFAF5	chr20	+	13797108	13797192	13789487	13789548	13797520	13797603	7.74048e-06	0.00205142	-0.061
ENSG00000165675.12	ENOX2	chrX	-	129917520	129917664	129843216	129843305	130035657	130035705	7.76411e-06	0.00205271	-0.058
ENSG00000186088.11	GSAP	chr7	-	76952963	76953059	76950041	76950136	76955528	76955563	7.87349e-06	0.00207661	-0.071
ENSG00000106692.9	FKTN	chr9	+	108380239	108380373	108370099	108370232	108382214	108382342	7.90974e-06	0.00208115	-0.107
ENSG00000198208.7	RPS6KL1	chr14	-	75375803	75375864	75375552	75375635	75376245	75376371	8.01141e-06	0.00210285	-0.308
ENSG00000168890.9	TMEM150A	chr2	-	85828428	85828605	85828143	85828230	85829006	85829187	8.03254e-06	0.00210335	0.192
ENSG00000249859.3	PVT1	chr8	+	129094998	129095094	129001506	129001537	129108763	129108902	8.0518e-06	0.00210336	-0.128
ENSG00000185480.7	PARPBP	chr12	+	102576326	102576405	102569260	102569444	102589089	102589225	8.3025e-06	0.00215142	-0.085
ENSG00000130429.8	ARPC1B	chr7	+	98974066	98974197	98972351	98972404	98974956	98975062	8.40961e-06	0.00216582	0.338
ENSG00000233038.1	AC011899.9	chr7	+	157648618	157648822	157647220	157647567	157649981	157650240	8.40866e-06	0.00216582	0.343
ENSG00000153560.7	UBP1	chr3	-	33482168	33482415	33467081	33467233	33482760	33482863	8.49075e-06	0.00218159	-0.249
ENSG00000004455.12	AK2	chr1	-	33497144	33497262	33487193	33487304	33502336	33502503	8.69329e-06	0.00222839	-0.174
ENSG00000172046.14	USP19	chr3	-	49154869	49155003	49154159	49154376	49155379	49155411	8.93528e-06	0.0022847	0.165
ENSG00000163138.14	PACRGL	chr4	+	20703380	20703507	20702060	20702329	20706088	20706147	9.19196e-06	0.00233575	-0.486
ENSG00000132823.6	OSER1	chr20	-	42835924	42835959	42835520	42835638	42838651	42838716	9.19746e-06	0.00233575	-0.318
ENSG00000114796.11	KLHL24	chr3	+	183361267	183361330	183353407	183353535	183368083	183368378	9.27405e-06	0.00234975	-0.102
ENSG00000186866.12	POFUT2	chr21	-	46703297	46703442	46702263	46702374	46705592	46705606	9.29766e-06	0.00235029	-0.06
ENSG00000204599.10	TRIM39	chr6	+	30295428	30295473	30294611	30294772	30296685	30296818	9.38804e-06	0.00236767	0.135
ENSG00000124588.15	NQO2	chr6	+	3004728	3004885	3002283	3002520	3006701	3006793	9.54184e-06	0.00239285	-0.34
ENSG00000214022.7	REPIN1	chr7	+	150066830	150066957	150065897	150066030	150068316	150069331	9.64601e-06	0.00240502	0.079
ENSG00000115310.13	RTN4	chr2	-	55255299	55255356	55214626	55214834	55277563	55277734	9.64587e-06	0.00240502	0.258
ENSG00000135362.9	PRR5L	chr11	+	36476218	36476368	36475508	36475571	36483891	36484163	9.74889e-06	0.00242515	-0.525
ENSG00000106333.8	PCOLCE	chr7	+	100203127	100203435	100202775	100202838	100204038	100204253	9.95286e-06	0.00246468	-0.122
ENSG00000101928.8	MOSPD1	chrX	-	134033119	134033195	134030843	134031064	134033309	134033564	1.01144e-05	0.00249904	0.103
ENSG00000176834.9	VSIG10	chr12	-	118573443	118573547	118564285	118564475	118573661	118573753	1.02615e-05	0.00252071	-0.145
ENSG00000048991.12	R3HDM1	chr2	+	136374237	136374327	136360069	136360278	136379063	136379178	1.02712e-05	0.00252071	0.093
ENSG00000026508.12	CD44	chr11	+	35223217	35223334	35219667	35219793	35226058	35226187	1.02313e-05	0.00252071	0.252
ENSG00000149547.10	EI24	chr11	+	125439999	125440086	125439175	125439469	125442353	125442465	1.02947e-05	0.00252081	0.054
ENSG00000223705.5	NSUN5P1	chr7	+	75042066	75042210	75039644	75039743	75044162	75044301	1.04019e-05	0.00253009	-0.153
ENSG00000267120.3	AD000671.6	chr19	-	36231280	36231465	36230610	36230989	36231924	36232129	1.05413e-05	0.0025583	0.131
ENSG00000124788.13	ATXN1	chr6	-	16753463	16753578	16737081	16740149	16761528	16761691	1.07753e-05	0.00260355	-0.069
ENSG00000161265.10	U2AF1L4	chr19	-	36235526	36235639	36234970	36235322	36236025	36236077	1.09554e-05	0.00263543	0.18
ENSG00000221983.3	UBA52	chr19	+	18685866	18685961	18684471	18684558	18687812	18688100	1.10052e-05	0.00264161	-0.057
ENSG00000162341.11	TPCN2	chr11	+	68822188	68822265	68821500	68821565	68822642	68822820	1.12398e-05	0.00269201	0.082
ENSG00000103326.6	CAPN15	chr16	+	586028	586142	583945	583998	597558	598209	1.13239e-05	0.00270035	-0.055
ENSG00000237298.4	TTN-AS1	chr2	+	179396040	179396305	179387893	179388363	179400458	179400555	1.13798e-05	0.00270778	0.101
ENSG00000026508.12	CD44	chr11	+	35223214	35223334	35219667	35219793	35226058	35226187	1.14198e-05	0.00271139	0.241
ENSG00000149179.9	C11orf49	chr11	+	46969576	46969715	46958329	46958402	47073938	47074069	1.1598e-05	0.00272415	-0.057
ENSG00000167261.9	DPEP2	chr16	-	68021754	68021890	68021296	68021663	68023225	68023301	1.16441e-05	0.00272678	0.141
ENSG00000188917.10	TRMT2B	chrX	-	100296305	100296360	100291962	100292062	100306805	100307043	1.1659e-05	0.00272678	0.175
ENSG00000196998.11	WDR45	chrX	-	48935301	48935406	48934303	48934412	48935495	48935570	1.1937e-05	0.00277993	-0.072
ENSG00000184465.11	WDR27	chr6	-	170070664	170070789	170064261	170064382	170072350	170072492	1.20214e-05	0.00278842	-0.058
ENSG00000186132.10	C2orf76	chr2	-	120097734	120097937	120097402	120097547	120123932	120124258	1.20489e-05	0.00278842	0.381
ENSG00000163625.11	WDFY3	chr4	-	85717673	85717905	85716031	85716132	85719148	85719261	1.21297e-05	0.00280097	-0.051
ENSG00000007341.14	ST7L	chr1	-	113159434	113159517	113153080	113153625	113161530	113161563	1.23231e-05	0.00283366	0.061
ENSG00000081721.7	DUSP12	chr1	+	161720921	161721167	161719594	161719878	161721444	161721571	1.30964e-05	0.00298166	-0.29
ENSG00000100767.11	PAPLN	chr14	+	73727416	73727537	73725976	73726253	73727863	73728002	1.31287e-05	0.00298166	-0.186
ENSG00000126214.16	KLC1	chr14	+	104158695	104158762	104145734	104145882	104166991	104167064	1.33579e-05	0.0030271	0.066
ENSG00000166484.15	MAPK7	chr17	+	19283796	19283814	19283094	19283260	19283920	19283936	1.34889e-05	0.00304418	0.051
ENSG00000133943.16	C14orf159	chr14	+	91614124	91614202	91611564	91611657	91623982	91624034	1.3848e-05	0.00311387	-0.112
ENSG00000147421.13	HMBOX1	chr8	+	28906806	28906878	28906473	28906565	28907718	28908171	1.38546e-05	0.00311387	0.101
ENSG00000123411.10	IKZF4	chr12	+	56417454	56417548	56411909	56411961	56418837	56418942	1.39106e-05	0.00312005	0.25
ENSG00000237298.4	TTN-AS1	chr2	+	179447298	179447433	179388178	179388363	179448439	179448648	1.39638e-05	0.00312201	-0.484
ENSG00000196605.3	ZNF846	chr19	-	9870535	9870618	9868150	9869440	9872757	9872841	1.40049e-05	0.00312201	-0.215
ENSG00000153339.9	TRAPPC8	chr18	-	29496234	29496409	29489629	29489723	29511291	29511486	1.41601e-05	0.00314098	-0.067
ENSG00000166169.12	POLL	chr10	-	103345072	103345235	103340004	103340173	103347960	103347987	1.41559e-05	0.00314098	0.266
ENSG00000135250.12	SRPK2	chr7	-	104909252	104909316	104844074	104844232	104937867	104937980	1.43156e-05	0.00315909	-0.107
ENSG00000075407.13	ZNF37A	chr10	+	38383858	38384152	38383263	38383418	38384465	38384487	1.44484e-05	0.0031756	0.129
ENSG00000205592.9	MUC19	chr12	+	40929707	40929761	40929005	40929059	40930724	40930778	1.4423e-05	0.0031756	0.261
ENSG00000154358.15	OBSCN	chr1	+	228480223	228480487	228476325	228476589	228481053	228481317	1.46095e-05	0.00319079	-0.17
ENSG00000176261.11	ZBTB8OS	chr1	-	33100368	33100393	33097427	33097480	33116033	33116136	1.45874e-05	0.00319079	-0.108
ENSG00000139579.8	NABP2	chr12	+	56617367	56617496	56615798	56615983	56618617	56618719	1.45499e-05	0.00319079	0.216
ENSG00000184007.13	PTP4A2	chr1	-	32396533	32396743	32384600	32385259	32403378	32403401	1.50028e-05	0.00325174	-0.211
ENSG00000166169.12	POLL	chr10	-	103344358	103344676	103340004	103340173	103347960	103348005	1.51792e-05	0.00326412	0.082
ENSG00000165698.11	C9orf9	chr9	+	135762755	135762958	135759297	135759478	135763676	135763824	1.51406e-05	0.00326412	0.134
ENSG00000174306.17	ZHX3	chr20	-	39829925	39830024	39807087	39813841	39830696	39832681	1.56741e-05	0.00335735	0.1
ENSG00000166313.14	APBB1	chr11	-	6423805	6423955	6423311	6423439	6424374	6424438	1.57632e-05	0.00336607	-0.057
ENSG00000085832.12	EPS15	chr1	-	51924712	51924820	51924067	51924405	51926762	51926822	1.57763e-05	0.00336607	0.424
ENSG00000176974.13	SHMT1	chr17	-	18263727	18263866	18256985	18257131	18266685	18266856	1.58591e-05	0.00337717	-0.176
ENSG00000105048.12	TNNT1	chr19	-	55653224	55653425	55652553	55652670	55656911	55656933	1.59445e-05	0.00338874	-0.108
ENSG00000166681.9	NGFRAP1	chrX	+	102631955	102632034	102631267	102631541	102632437	102633005	1.60109e-05	0.00338971	-0.063
ENSG00000104218.9	CSPP1	chr8	+	68004037	68004118	67998241	67998345	68007527	68007967	1.62319e-05	0.00342984	-0.112
ENSG00000244026.2	FAM86DP	chr3	-	75476925	75477059	75476577	75476843	75479982	75480065	1.661e-05	0.00348286	-0.246
ENSG00000137802.9	MAPKBP1	chr15	+	42115136	42115204	42114790	42114875	42116681	42116767	1.66658e-05	0.00348787	0.118
ENSG00000156162.12	DPY19L4	chr8	+	95746857	95746982	95738558	95738669	95751640	95751762	1.67541e-05	0.00349966	-0.097
ENSG00000169398.15	PTK2	chr8	-	141935759	141935848	141900641	141900868	141958764	141958822	1.70156e-05	0.00354077	-0.147
ENSG00000106609.12	TMEM248	chr7	+	66387135	66387233	66386218	66386448	66413530	66413681	1.70703e-05	0.00354344	-0.345
ENSG00000250337.1	LINC01021	chr5	+	27485032	27485136	27475641	27475802	27494341	27494425	1.70932e-05	0.00354344	-0.317
ENSG00000138293.15	NCOA4	chr10	+	51580555	51580696	51565204	51565296	51581269	51581378	1.72672e-05	0.00355929	-0.062
ENSG00000183242.7	WT1-AS	chr11	+	32474807	32475724	32473566	32473677	32479460	32479509	1.73527e-05	0.00356477	-0.114
ENSG00000122741.11	DCAF10	chr9	+	37857237	37857348	37854776	37854979	37860044	37860190	1.73923e-05	0.00356477	-0.102
ENSG00000185596.12	WASH3P	chr15	+	102506155	102506426	102501806	102501844	102512798	102512897	1.74241e-05	0.00356477	-0.071
ENSG00000158062.16	UBXN11	chr1	-	26627416	26627544	26624452	26624553	26628184	26628213	1.73675e-05	0.00356477	0.147
ENSG00000158796.12	DEDD	chr1	-	161100795	161100972	161100604	161100637	161102340	161102478	1.75412e-05	0.00358204	-0.056
ENSG00000090006.13	LTBP4	chr19	+	41113270	41113435	41112309	41112432	41114125	41114275	1.77077e-05	0.0036026	-0.169
ENSG00000157869.10	RAB28	chr4	-	13371494	13371589	13369347	13370274	13378168	13378246	1.77843e-05	0.00360615	-0.093
ENSG00000164509.9	IL31RA	chr5	+	55162438	55162582	55155336	55155427	55164618	55164736	1.78638e-05	0.00361338	0.14
ENSG00000150076.18	C10orf68	chr10	+	32912646	32912745	32873189	32873232	32974897	32975008	1.79082e-05	0.00361338	0.26
ENSG00000182718.12	ANXA2	chr15	-	60688349	60688626	60685295	60685639	60689456	60689537	1.8273e-05	0.0036766	0.12
ENSG00000245479.2	RP11-387D10.3	chr15	+	91204623	91204714	91203464	91204055	91207585	91208198	1.84349e-05	0.00370237	0.664
ENSG00000182648.7	LINC01006	chr7	-	156398351	156398458	156397881	156398074	156433229	156433275	1.85788e-05	0.00371762	-0.433
ENSG00000154358.15	OBSCN	chr1	+	228479598	228479862	228476325	228476589	228481053	228481317	1.8574e-05	0.00371762	-0.289
ENSG00000105948.9	TTC26	chr7	+	138832951	138833123	138827001	138827051	138849877	138849980	1.86518e-05	0.00372132	-0.185
ENSG00000178104.15	PDE4DIP	chr1	-	144854517	144854656	144854164	144854211	144855739	144855883	1.87473e-05	0.00373088	-0.066
ENSG00000143390.13	RFX5	chr1	-	151318403	151318433	151317437	151317664	151318680	151318809	1.93768e-05	0.00382142	0.061
ENSG00000249859.3	PVT1	chr8	+	128864179	128864593	128808139	128808254	128902834	128903198	1.95637e-05	0.00384442	0.095
ENSG00000133943.16	C14orf159	chr14	+	91690022	91690139	91682200	91682804	91691027	91691166	1.96549e-05	0.00385543	0.132
ENSG00000198408.9	MGEA5	chr10	-	103553669	103553755	103552595	103552700	103557736	103557911	1.97196e-05	0.0038612	0.067
ENSG00000109083.9	IFT20	chr17	-	26659171	26659408	26658427	26659013	26662365	26662461	2.00277e-05	0.00391453	0.091
ENSG00000183647.6	ZNF530	chr19	+	58117053	58119195	58115644	58115774	58123870	58124090	2.03423e-05	0.00396537	-0.116
ENSG00000267575.2	CTC-459F4.3	chr19	+	28288661	28289084	28284402	28284558	28296512	28296680	2.04787e-05	0.00398134	0.072
ENSG00000060237.12	WNK1	chr12	+	974275	974530	971248	971436	977031	978270	2.05408e-05	0.0039832	0.353
ENSG00000062716.6	VMP1	chr17	+	57812698	57812834	57784825	57785109	57842331	57842499	2.06339e-05	0.00398322	-0.123
ENSG00000161265.10	U2AF1L4	chr19	-	36235526	36235593	36235223	36235322	36236025	36236058	2.07793e-05	0.00400423	0.18
ENSG00000122515.10	ZMIZ2	chr7	+	44789413	44789579	44788179	44788230	44795786	44795898	2.09425e-05	0.00402858	0.082
ENSG00000205643.6	CDPF1	chr22	-	46643006	46643118	46639909	46641135	46646152	46646208	2.15e-05	0.00411412	0.145
ENSG00000168137.11	SETD5	chr3	+	9478533	9478572	9477411	9477590	9482139	9482382	2.16662e-05	0.00413871	0.076
ENSG00000103064.9	SLC7A6	chr16	+	68324298	68324443	68308593	68309152	68328607	68328704	2.17353e-05	0.00414467	-0.228
ENSG00000106333.8	PCOLCE	chr7	+	100203298	100203435	100202713	100202838	100204038	100204253	2.19558e-05	0.00417942	-0.09
ENSG00000140105.13	WARS	chr14	-	100841619	100841687	100835423	100835595	100841847	100842588	2.2152e-05	0.00420899	-0.216
ENSG00000068354.11	TBC1D25	chrX	+	48399720	48399830	48397844	48398308	48417545	48417734	2.22264e-05	0.00420899	0.146
ENSG00000083099.6	LYRM2	chr6	-	90334207	90334321	90331439	90331667	90347460	90347601	2.23125e-05	0.00421468	-0.389
ENSG00000197798.4	FAM118B	chr11	+	126099119	126099231	126081671	126081725	126104889	126104982	2.23495e-05	0.00421468	0.113
ENSG00000176978.9	DPP7	chr9	-	140006392	140006481	140006141	140006206	140007404	140007571	2.24697e-05	0.00421856	-0.108
ENSG00000157036.8	EXOG	chr3	+	38539119	38539269	38537762	38538021	38542845	38542985	2.24584e-05	0.00421856	0.166
ENSG00000131374.10	TBC1D5	chr3	-	17617905	17618041	17549965	17550097	17627844	17627958	2.26098e-05	0.00423006	-0.262
ENSG00000054523.12	KIF1B	chr1	+	10434911	10435104	10434373	10434523	10435312	10435431	2.25914e-05	0.00423006	-0.151
ENSG00000166169.12	POLL	chr10	-	103347002	103347163	103340004	103340173	103347960	103347976	2.26657e-05	0.00423006	0.073
ENSG00000106733.16	NMRK1	chr9	-	77684657	77684729	77683911	77684018	77684810	77684958	2.29364e-05	0.00425134	-0.127
ENSG00000137101.8	CD72	chr9	-	35618738	35618862	35618010	35618118	35619508	35619531	2.318e-05	0.00427132	-0.367
ENSG00000078403.12	MLLT10	chr10	+	21846549	21846753	21840744	21840850	21875222	21875277	2.33194e-05	0.0042826	-0.12
ENSG00000105993.10	DNAJB6	chr7	+	157202488	157208223	157178234	157178305	157208709	157210127	2.3527e-05	0.00428476	-0.145
ENSG00000101849.11	TBL1X	chrX	+	9621584	9621729	9608312	9608400	9622254	9622328	2.34388e-05	0.00428476	-0.108
ENSG00000148396.14	SEC16A	chr9	-	139339503	139339563	139338274	139338352	139340096	139340171	2.35186e-05	0.00428476	0.074
ENSG00000127603.19	MACF1	chr1	+	39844132	39844195	39835701	39835858	39844874	39845116	2.34513e-05	0.00428476	0.11
ENSG00000181666.13	HKR1	chr19	+	37837324	37837394	37826070	37826159	37838133	37838218	2.41455e-05	0.00437959	-0.183
ENSG00000099364.12	FBXL19	chr16	+	30939787	30939951	30939065	30939284	30941393	30941905	2.43473e-05	0.00440485	-0.061
ENSG00000185900.5	POMK	chr8	+	42957647	42957743	42952666	42952758	42958670	42958973	2.45333e-05	0.00442861	-0.051
ENSG00000144550.8	CPNE9	chr3	+	9759712	9759894	9758741	9758788	9760158	9760286	2.46e-05	0.00442861	0.273
ENSG00000166169.12	POLL	chr10	-	103345618	103345913	103340004	103340173	103347960	103347985	2.52325e-05	0.00453501	0.098
ENSG00000175224.12	ATG13	chr11	+	46639874	46639925	46639076	46639440	46642609	46642707	2.53652e-05	0.00455139	0.088
ENSG00000176261.11	ZBTB8OS	chr1	-	33099551	33099711	33093108	33093145	33116002	33116126	2.54842e-05	0.00456525	0.143
ENSG00000172716.12	SLFN11	chr17	-	33693965	33694062	33690457	33690845	33700492	33700641	2.56456e-05	0.00458029	-0.207
ENSG00000072135.8	PTPN18	chr2	+	131117180	131117219	131116805	131116882	131126705	131126774	2.60778e-05	0.00464546	-0.168
ENSG00000110075.10	PPP6R3	chr11	+	68272612	68272739	68228205	68228295	68282495	68282634	2.61016e-05	0.00464546	-0.09
ENSG00000156265.11	MAP3K7CL	chr21	+	30452872	30453029	30449791	30450034	30457392	30457464	2.61484e-05	0.00464623	-0.339
ENSG00000248309.1	MEF2C-AS1	chr5	+	88243952	88244032	88201518	88201590	88261657	88261689	2.63008e-05	0.00465065	-0.311
ENSG00000176261.11	ZBTB8OS	chr1	-	33099551	33099711	33097425	33097480	33116033	33116504	2.62848e-05	0.00465065	-0.082
ENSG00000197150.8	ABCB8	chr7	+	150728327	150728378	150725536	150725697	150729930	150730121	2.628e-05	0.00465065	0.5
ENSG00000065427.10	KARS	chr16	-	75678180	75678360	75675461	75675621	75681361	75681553	2.64138e-05	0.00465754	-0.052
ENSG00000147535.12	PPAPDC1B	chr8	-	38125888	38125925	38125414	38125478	38126399	38126508	2.64674e-05	0.00465754	0.162
ENSG00000272657.1	AP000320.7	chr21	+	35587800	35587841	35497640	35497780	35635119	35635221	2.68632e-05	0.0047196	0.275
ENSG00000181790.6	BAI1	chr8	+	143603325	143603476	143602183	143602286	143604001	143604071	2.73176e-05	0.00478407	-0.196
ENSG00000173575.14	CHD2	chr15	+	93541378	93541491	93540482	93540633	93541728	93541836	2.7453e-05	0.00479246	-0.057
ENSG00000131115.11	ZNF227	chr19	+	44733885	44733969	44732598	44732725	44738854	44738988	2.7526e-05	0.00479754	0.073
ENSG00000134152.6	KATNBL1	chr15	-	34470021	34470200	34458130	34458316	34502151	34502280	2.76048e-05	0.00480364	-0.228
ENSG00000166762.12	CATSPER2	chr15	-	43941924	43942077	43932521	43932694	43956615	43956741	2.80532e-05	0.00486619	0.319
ENSG00000072135.8	PTPN18	chr2	+	131116969	131117065	131116805	131116882	131126705	131126774	2.81684e-05	0.00487844	-0.105
ENSG00000158062.16	UBXN11	chr1	-	26629303	26629409	26628184	26628213	26633082	26633100	2.86057e-05	0.00493294	-0.115
ENSG00000204790.8	CBWD6	chr9	-	69243512	69243652	69240012	69240059	69245075	69245163	2.93524e-05	0.00503569	0.055
ENSG00000131591.13	C1orf159	chr1	-	1027370	1027483	1026425	1026945	1041335	1041429	2.95237e-05	0.00505029	-0.051
ENSG00000166743.5	ACSM1	chr16	-	20648060	20648162	20638510	20638638	20648692	20648773	2.95298e-05	0.00505029	0.462
ENSG00000149346.10	SLX4IP	chr20	+	10541347	10541468	10438823	10438879	10579322	10579400	3.00322e-05	0.00512021	-0.111
ENSG00000100554.7	ATP6V1D	chr14	-	67803363	67803455	67778721	67778900	67805277	67805479	3.02506e-05	0.00513345	0.179
ENSG00000185049.8	NELFA	chr4	-	2008724	2008926	1991434	1991596	2010476	2010575	3.04814e-05	0.00515663	-0.183
ENSG00000176407.13	KCMF1	chr2	+	85241058	85241176	85199323	85199363	85255011	85255179	3.06988e-05	0.00518463	0.46
ENSG00000125648.10	SLC25A23	chr19	-	6438201	6438323	6436089	6436475	6438457	6438545	3.08771e-05	0.00519946	0.467
ENSG00000197555.5	SIPA1L1	chr14	+	72165697	72165844	72152078	72152348	72169097	72169222	3.15546e-05	0.00528914	-0.096
ENSG00000110628.9	SLC22A18	chr11	+	2930425	2930586	2924343	2924719	2937851	2937970	3.18428e-05	0.00532754	-0.251
ENSG00000163803.8	PLB1	chr2	+	28827521	28827626	28826832	28826914	28829362	28829434	3.1881e-05	0.00532754	0.151
ENSG00000135926.8	TMBIM1	chr2	-	219150485	219150657	219146662	219146904	219157188	219157258	3.19972e-05	0.00533881	0.059
ENSG00000169131.6	ZNF354A	chr5	-	178155990	178156074	178153999	178154126	178157556	178157660	3.21974e-05	0.00536403	0.082
ENSG00000198521.7	ZNF43	chr19	-	22033739	22033964	22028193	22028308	22034706	22034830	3.23629e-05	0.00536832	-0.352
ENSG00000204642.9	HLA-F	chr6	+	29693787	29693820	29693223	29693340	29694659	29695073	3.24193e-05	0.00536832	-0.232
ENSG00000214013.5	GANC	chr15	+	42621503	42621647	42619560	42619640	42622773	42622870	3.22896e-05	0.00536832	-0.069
ENSG00000213614.5	HEXA	chr15	-	72640026	72640099	72638575	72638666	72640388	72640475	3.25514e-05	0.00537392	0.091
ENSG00000101307.11	SIRPB1	chr20	-	1552365	1552683	1546798	1546913	1558983	1559340	3.29643e-05	0.00542635	-0.058
ENSG00000005175.5	RPAP3	chr12	-	48073275	48073377	48063889	48064128	48073486	48073557	3.3097e-05	0.00543123	-0.075
ENSG00000141556.16	TBCD	chr17	+	80851422	80851508	80842020	80842078	80861280	80861354	3.34788e-05	0.00548524	0.133
ENSG00000239665.4	RP11-295P9.3	chr10	+	13690084	13690230	13688669	13689276	13696352	13696427	3.35263e-05	0.00548524	0.157
ENSG00000273345.1	CTD-2410N18.4	chr5	-	133655048	133655188	133643828	133644157	133657481	133657594	3.38891e-05	0.00552807	0.153
ENSG00000100226.11	GTPBP1	chr22	+	39130154	39130237	39126616	39126664	39130328	39130402	3.39705e-05	0.00553309	0.357
ENSG00000144455.9	SUMF1	chr3	-	3824186	3824385	3820924	3821006	3830597	3830758	3.42548e-05	0.00556284	0.161
ENSG00000090006.13	LTBP4	chr19	+	41128854	41128926	41128305	41128572	41131761	41131914	3.47056e-05	0.00561938	-0.062
ENSG00000242193.5	RP11-568K15.1	chr1	-	177993538	177993621	177975270	177977284	177995289	177995390	3.54128e-05	0.00570044	0.076
ENSG00000173295.3	FAM86B3P	chr8	+	8092004	8092106	8090315	8090396	8093337	8093469	3.62232e-05	0.00581351	-0.301
ENSG00000006831.9	ADIPOR2	chr12	+	1812051	1812148	1800328	1800379	1882007	1882127	3.66735e-05	0.00586	-0.317
ENSG00000104938.12	CLEC4M	chr19	+	7828278	7828362	7828034	7828198	7830523	7831093	3.67974e-05	0.00587123	0.443
ENSG00000174446.8	SNAPC5	chr15	-	66787667	66787757	66786150	66786890	66789827	66790097	3.71228e-05	0.00590593	-0.057
ENSG00000173988.8	LRRC63	chr13	+	46801646	46802324	46787136	46787254	46802799	46802868	3.77039e-05	0.00598967	0.325
ENSG00000213906.5	LTB4R2	chr14	+	24779376	24779461	24774939	24775073	24779860	24780351	3.7793e-05	0.00599315	-0.166
ENSG00000048052.17	HDAC9	chr7	+	18434737	18434806	18365134	18365215	18535884	18535947	3.78353e-05	0.00599315	0.136
ENSG00000078687.12	TNRC6C	chr17	+	76075475	76075622	76071216	76071359	76079127	76079247	3.79337e-05	0.00600005	-0.078
ENSG00000068097.10	HEATR6	chr17	-	58151106	58151247	58150524	58150640	58153490	58153598	3.80672e-05	0.00601247	-0.077
ENSG00000232104.2	RP11-509J21.1	chr9	+	3568793	3568889	3546777	3546912	3602522	3602584	3.82989e-05	0.00604036	-0.355
ENSG00000161180.6	CCDC116	chr22	+	21988973	21989555	21988310	21988859	21990720	21991616	3.84742e-05	0.00605927	0.245
ENSG00000125089.12	SH3TC1	chr4	+	8206509	8206780	8201097	8201132	8206893	8207093	3.86391e-05	0.00606779	0.093
ENSG00000114867.15	EIF4G1	chr3	+	184033276	184033333	184032282	184032462	184035504	184035604	3.89121e-05	0.00610189	0.076
ENSG00000132466.13	ANKRD17	chr4	-	74005247	74006000	74000833	74000979	74007457	74007509	3.90415e-05	0.00611343	-0.053
ENSG00000153930.6	ANKFN1	chr17	+	54331476	54331581	54305277	54305318	54403581	54403716	3.92851e-05	0.00614278	0.062
ENSG00000169871.8	TRIM56	chr7	+	100730286	100730449	100728719	100728852	100730592	100731409	4.02278e-05	0.00625446	0.073
ENSG00000176142.8	TMEM39A	chr3	-	119182182	119182319	119180808	119180995	119187581	119187677	4.0674e-05	0.00629699	0.065
ENSG00000166169.12	POLL	chr10	-	103342519	103342648	103340004	103340173	103347960	103347976	4.10031e-05	0.00633004	0.109
ENSG00000125107.12	CNOT1	chr16	-	58657185	58657313	58622724	58622810	58663631	58663789	4.11153e-05	0.00633841	0.144
ENSG00000137207.7	YIPF3	chr6	-	43480806	43480836	43480498	43480612	43481096	43481189	4.12647e-05	0.0063525	-0.06
ENSG00000180628.10	PCGF5	chr10	+	93000240	93000337	92982445	92982740	93008261	93008317	4.20369e-05	0.00643517	-0.072
ENSG00000141977.5	CIB3	chr19	-	16278947	16279095	16275528	16275724	16280440	16280533	4.21091e-05	0.00643722	0.06
ENSG00000105701.11	FKBP8	chr19	-	18650180	18650269	18648410	18648583	18652488	18652805	4.23373e-05	0.00645634	-0.097
ENSG00000133422.8	MORC2	chr22	-	31359210	31359320	31354626	31354680	31363051	31364187	4.31475e-05	0.00654115	-0.36
ENSG00000197857.9	ZNF44	chr19	-	12404046	12404190	12361056	12361183	12405506	12405609	4.31415e-05	0.00654115	0.22
ENSG00000175224.12	ATG13	chr11	+	46642609	46642707	46639084	46639440	46646870	46646914	4.34556e-05	0.00657875	-0.358
ENSG00000101294.12	HM13	chr20	+	30155880	30156027	30149436	30149539	30156922	30157370	4.36943e-05	0.00660575	-0.101
ENSG00000178773.10	CPNE7	chr16	+	89657534	89657668	89657414	89657466	89661774	89661831	4.39359e-05	0.0066099	-0.159
ENSG00000131374.10	TBC1D5	chr3	-	17617905	17618041	17549965	17550097	17664139	17664257	4.40841e-05	0.0066099	-0.087
ENSG00000138688.11	KIAA1109	chr4	+	123128695	123128793	123128264	123128420	123130313	123130359	4.38807e-05	0.0066099	0.053
ENSG00000175193.8	PARL	chr3	-	183551511	183551613	183551279	183551377	183558357	183558428	4.41574e-05	0.00661183	-0.064
ENSG00000011638.6	TMEM159	chr16	+	21172298	21172329	21170025	21170067	21172405	21172599	4.43164e-05	0.00662557	0.137
ENSG00000130396.16	MLLT4	chr6	+	168366436	168366533	168363112	168363247	168369793	168369878	4.4504e-05	0.00662747	-0.077
ENSG00000111832.8	RWDD1	chr6	+	116894020	116894148	116893584	116893641	116901457	116901523	4.47959e-05	0.00666186	0.455
ENSG00000220804.4	AC093642.5	chr2	+	243058333	243058383	243037037	243037178	243061115	243061208	4.5651e-05	0.00675234	-0.181
ENSG00000087266.11	SH3BP2	chr4	+	2816537	2816644	2794798	2794865	2822340	2822480	4.55892e-05	0.00675234	-0.054
ENSG00000154582.12	TCEB1	chr8	-	74881794	74881908	74868145	74868289	74884311	74884467	4.60724e-05	0.00680547	-0.197
ENSG00000092199.13	HNRNPC	chr14	-	21731469	21731495	21702111	21702388	21737456	21737562	4.65387e-05	0.00684663	0.062
ENSG00000141027.16	NCOR1	chr17	-	15990485	15990659	15989712	15989756	15995176	15995232	4.80169e-05	0.00700759	0.063
ENSG00000138078.11	PREPL	chr2	-	44587757	44587815	44586635	44586889	44588518	44588632	4.83302e-05	0.00703272	-0.153
ENSG00000132359.9	RAP1GAP2	chr17	+	2908634	2908734	2901514	2901670	2909248	2909335	4.83436e-05	0.00703272	-0.136
ENSG00000058866.10	DGKG	chr3	-	185979487	185979567	185975642	185975728	185985473	185985566	4.86942e-05	0.00706874	-0.264
ENSG00000137806.4	NDUFAF1	chr15	-	41686302	41686556	41680645	41680720	41687056	41687242	4.88196e-05	0.00707755	0.051
ENSG00000156171.10	DRAM2	chr1	-	111682209	111682333	111680144	111680208	111682659	111682684	4.89134e-05	0.00708177	-0.078
ENSG00000132694.14	ARHGEF11	chr1	-	156950228	156950278	156947995	156948174	156954130	156954229	4.95704e-05	0.00714547	-0.204
ENSG00000248309.1	MEF2C-AS1	chr5	+	88238832	88238939	88201025	88201087	88243952	88244032	4.98466e-05	0.00716947	-0.106
ENSG00000167562.7	ZNF701	chr19	+	53075492	53075621	53073553	53073583	53077329	53077415	4.99549e-05	0.00717561	-0.065
ENSG00000141012.8	GALNS	chr16	-	88922614	88922709	88909437	88909607	88923165	88923378	5.04027e-05	0.00722097	-0.39
ENSG00000103429.6	BFAR	chr16	+	14743660	14743830	14738144	14738466	14755748	14755922	5.08454e-05	0.00727487	0.12
ENSG00000156500.10	FAM122C	chrX	+	133972756	133973633	133963255	133963312	133979234	133979278	5.13913e-05	0.00733382	0.104
ENSG00000223745.3	RP4-717I23.3	chr1	-	93756121	93756243	93730225	93730329	93770944	93771027	5.18843e-05	0.00739453	-0.1
ENSG00000108433.11	GOSR2	chr17	+	45009432	45009565	45006885	45006950	45012394	45012535	5.20596e-05	0.00740985	0.096
ENSG00000158106.8	RHPN1	chr8	+	144461081	144461248	144460438	144460516	144461484	144461678	5.27251e-05	0.00748512	0.066
ENSG00000130429.8	ARPC1B	chr7	+	98974956	98975062	98974066	98974197	98983324	98983401	5.28526e-05	0.00749351	-0.065
ENSG00000120029.8	C10orf76	chr10	-	103716353	103716480	103649168	103649247	103734968	103735057	5.31023e-05	0.00751916	0.261
ENSG00000107099.11	DOCK8	chr9	+	284374	284567	280790	280905	286460	286636	5.33445e-05	0.00754369	-0.068
ENSG00000140105.13	WARS	chr14	-	100840472	100840602	100828044	100828258	100841619	100841670	5.35856e-05	0.00755826	-0.233
ENSG00000185920.11	PTCH1	chr9	-	98244415	98244520	98244230	98244322	98247966	98248156	5.38219e-05	0.00758182	0.188
ENSG00000237298.4	TTN-AS1	chr2	+	179448250	179448375	179406948	179407088	179449299	179449543	5.4062e-05	0.00760586	-0.599
ENSG00000101974.10	ATP11C	chrX	-	138813809	138813914	138808507	138811121	138820074	138820228	5.45413e-05	0.00765362	-0.094
ENSG00000168096.10	ANKS3	chr16	-	4776979	4777178	4774750	4774832	4784156	4784250	5.49193e-05	0.00769678	-0.157
ENSG00000080947.10	CROCCP3	chr1	-	16817359	16817421	16817112	16817278	16825697	16825752	5.53432e-05	0.00773537	-0.343
ENSG00000228486.5	AC017099.3	chr2	+	98310909	98311062	98306718	98306790	98315488	98315595	5.54772e-05	0.00773537	-0.074
ENSG00000052795.8	FNIP2	chr4	+	159780208	159780410	159772472	159772602	159780729	159780799	5.57422e-05	0.00776242	0.189
ENSG00000173273.11	TNKS	chr8	+	9590788	9590954	9584150	9584230	9592374	9592594	5.61206e-05	0.00779528	-0.082
ENSG00000092199.13	HNRNPC	chr14	-	21704531	21704619	21702111	21702388	21730759	21733675	5.60992e-05	0.00779528	0.082
ENSG00000251136.4	RP11-37B2.1	chr8	-	90737745	90737869	90736856	90737194	90769272	90769939	5.64386e-05	0.0078196	-0.159
ENSG00000148690.10	FRA10AC1	chr10	-	95451765	95451850	95447160	95447206	95452402	95452486	5.71094e-05	0.0078826	-0.056
ENSG00000118513.14	MYB	chr6	+	135516097	135516219	135515493	135515598	135520045	135520188	5.77513e-05	0.00796118	-0.211
ENSG00000117569.14	PTBP2	chr1	+	97271974	97272008	97270340	97270495	97272421	97272514	5.84126e-05	0.00803211	0.054
ENSG00000140451.8	PIF1	chr15	-	65110455	65110543	65110144	65110290	65112045	65112185	5.8753e-05	0.00805138	-0.181
ENSG00000064652.6	SNX24	chr5	+	122337634	122337699	122337099	122337132	122343376	122343469	5.88429e-05	0.00805138	-0.104
ENSG00000186088.11	GSAP	chr7	-	76950649	76950720	76950041	76950136	76955528	76955590	5.8847e-05	0.00805138	-0.052
ENSG00000163281.7	GNPDA2	chr4	-	44724100	44724259	44712969	44713154	44728490	44728562	5.92588e-05	0.00807743	0.057
ENSG00000152061.17	RABGAP1L	chr1	+	174927027	174927310	174926593	174926686	174938413	174938524	6.06476e-05	0.00821558	-0.075
ENSG00000147421.13	HMBOX1	chr8	+	28782156	28782272	28747911	28748195	28827559	28827890	6.09718e-05	0.00824928	-0.142
ENSG00000116815.11	CD58	chr1	-	117061852	117061924	117057360	117057444	117064527	117064605	6.1137e-05	0.00825124	-0.089
ENSG00000163702.14	IL17RC	chr3	+	9974503	9974542	9974291	9974387	9974636	9975277	6.10733e-05	0.00825124	0.398
ENSG00000166262.11	FAM227B	chr15	-	49869368	49869502	49868690	49869042	49869825	49869861	6.17399e-05	0.00826499	-0.248
ENSG00000115687.9	PASK	chr2	-	242079935	242080168	242078068	242078209	242088828	242088850	6.14489e-05	0.00826499	-0.055
ENSG00000188917.10	TRMT2B	chrX	-	100292905	100293040	100290601	100290672	100296305	100296360	6.15376e-05	0.00826499	0.056
ENSG00000068097.10	HEATR6	chr17	-	58123385	58123460	58121033	58121495	58124669	58124766	6.21792e-05	0.00829979	-0.059
ENSG00000148180.12	GSN	chr9	+	124060043	124060120	124045596	124045670	124064240	124064427	6.22761e-05	0.0083026	-0.103
ENSG00000165275.5	TRMT10B	chr9	+	37763625	37763862	37761899	37762114	37768072	37768160	6.35617e-05	0.00843291	-0.117
ENSG00000160813.2	PPP1R35	chr7	-	100033253	100033390	100032904	100033156	100033470	100033687	6.4161e-05	0.00849182	-0.058
ENSG00000026297.11	RNASET2	chr6	-	167352382	167352496	167342991	167343279	167369584	167369679	6.47319e-05	0.00854672	-0.142
ENSG00000188130.9	MAPK12	chr22	-	50695510	50695622	50695027	50695075	50696671	50696730	6.47073e-05	0.00854672	0.115
ENSG00000144218.14	AFF3	chr2	-	100728847	100728986	100721965	100722045	100758945	100759057	6.56736e-05	0.00863979	-0.103
ENSG00000185404.12	SP140L	chr2	+	231254633	231254738	231253273	231253348	231256801	231256944	6.67203e-05	0.00874595	-0.152
ENSG00000129317.10	PUS7L	chr12	-	44152088	44152410	44148669	44149064	44152495	44152562	6.66661e-05	0.00874595	-0.07
ENSG00000069998.8	CECR5	chr22	-	17623987	17624021	17619439	17619628	17640015	17640145	6.73711e-05	0.0088135	-0.202
ENSG00000073921.13	PICALM	chr11	-	85779692	85779780	85742510	85742653	85780761	85780924	6.73967e-05	0.0088135	-0.059
ENSG00000182511.7	FES	chr15	+	91434211	91434421	91433630	91433714	91434783	91434906	6.82652e-05	0.0089058	-0.074
ENSG00000101972.14	STAG2	chrX	+	123137316	123137597	123095672	123095706	123155216	123155281	6.84547e-05	0.00891989	-0.056
ENSG00000110756.13	HPS5	chr11	-	18339297	18339454	18332933	18332998	18343623	18343745	6.88007e-05	0.00895432	-0.123
ENSG00000226435.6	ANKRD18DP	chr3	-	197794311	197794365	197792623	197792677	197803666	197803883	6.93722e-05	0.00901798	0.16
ENSG00000115902.6	SLC1A4	chr2	+	65238445	65238679	65237730	65237897	65245204	65245399	6.9907e-05	0.00906596	0.23
ENSG00000134470.15	IL15RA	chr10	-	6005705	6005804	6002329	6002530	6019739	6020008	7.00595e-05	0.00907459	-0.119
ENSG00000182718.12	ANXA2	chr15	-	60689456	60689537	60682411	60682516	60690141	60690163	7.01394e-05	0.00907459	0.189
ENSG00000175354.14	PTPN2	chr18	-	12793480	12793573	12788063	12788149	12794382	12794484	7.07871e-05	0.00914758	-0.15
ENSG00000141446.6	ESCO1	chr18	-	19120537	19120661	19119880	19119970	19144163	19144278	7.08956e-05	0.0091508	-0.175
ENSG00000007264.9	MATK	chr19	-	3785061	3785284	3784822	3784882	3786166	3786280	7.14671e-05	0.00919205	0.071
ENSG00000184635.9	ZNF93	chr19	+	20018532	20018625	20011721	20011900	20025542	20025631	7.20495e-05	0.00924523	-0.274
ENSG00000134242.11	PTPN22	chr1	-	114401099	114401195	114397528	114397671	114401623	114401700	7.20273e-05	0.00924523	0.085
ENSG00000113658.12	SMAD5	chr5	+	135483520	135483595	135468533	135468651	135488363	135488447	7.29578e-05	0.00935082	-0.112
ENSG00000154845.11	PPP4R1	chr18	-	9562919	9563044	9561977	9562073	9563375	9563548	7.36897e-05	0.00943357	-0.055
ENSG00000136279.14	DBNL	chr7	+	44091428	44091541	44084273	44084419	44096355	44096502	7.39899e-05	0.00944177	-0.145
ENSG00000198520.6	C1orf228	chr1	+	45190210	45190340	45189991	45190064	45190433	45190511	7.40746e-05	0.00944177	-0.09
ENSG00000218739.5	AC007390.5	chr2	+	37424396	37424493	37423650	37423663	37425636	37425815	7.48324e-05	0.00952052	-0.179
ENSG00000105755.3	ETHE1	chr19	-	44030352	44030501	44015588	44015718	44031248	44031353	7.49409e-05	0.00952052	0.058
ENSG00000170919.11	TPT1-AS1	chr13	+	45918463	45918581	45915563	45915749	45944093	45944317	7.54193e-05	0.00954452	0.219
ENSG00000038427.11	VCAN	chr5	+	82815167	82818128	82807921	82808215	82832825	82838087	7.54284e-05	0.00954452	0.395
ENSG00000149346.10	SLX4IP	chr20	+	10536878	10536968	10438823	10438879	10579322	10579400	7.56123e-05	0.00955674	-0.085
ENSG00000078687.12	TNRC6C	chr17	+	76073265	76073415	76071216	76071359	76079127	76079247	7.65693e-05	0.00965541	-0.06
ENSG00000131374.10	TBC1D5	chr3	-	17617905	17618041	17616694	17616802	17665340	17665405	7.78895e-05	0.00979993	-0.198
ENSG00000204410.10	MSH5	chr6	+	31713013	31713096	31712322	31712358	31715163	31715209	7.80648e-05	0.00979993	0.091
ENSG00000118557.11	PMFBP1	chr16	-	72164111	72164256	72162964	72163132	72164431	72164621	7.80645e-05	0.00979993	0.1
ENSG00000196873.11	CBWD3	chr9	+	70881135	70881222	70879383	70879430	70883849	70883894	7.82678e-05	0.00981306	-0.104
ENSG00000143224.13	PPOX	chr1	+	161139695	161139814	161139449	161139510	161140198	161140309	7.93799e-05	0.00993919	0.051
ENSG00000198185.7	ZNF334	chr20	-	45134945	45135097	45133252	45133379	45141178	45142198	7.99319e-05	0.009976	0.222
ENSG00000105397.9	TYK2	chr19	-	10480432	10480553	10478839	10478878	10488889	10489102	8.04265e-05	0.0100035	-0.193
ENSG00000167280.12	ENGASE	chr17	+	77075570	77075719	77073744	77073946	77076288	77076446	8.04151e-05	0.0100035	-0.055
ENSG00000184381.14	PLA2G6	chr22	-	38544499	38544630	38543374	38543482	38565224	38565474	8.11734e-05	0.0100849	-0.437
ENSG00000115053.11	NCL	chr2	-	232321996	232322068	232321711	232321835	232323711	232323836	8.23591e-05	0.010186	-0.159
ENSG00000140181.10	HERC2P2	chr15	-	23333848	23333999	23330886	23331101	23334999	23335103	8.37505e-05	0.0103464	-0.159
ENSG00000154611.10	PSMA8	chr18	+	23724522	23724535	23713837	23714031	23731821	23731946	8.39912e-05	0.0103644	0.12
ENSG00000076685.14	NT5C2	chr10	-	104865114	104865138	104860801	104860859	104865462	104865558	8.43897e-05	0.0103785	-0.137
ENSG00000163743.9	RCHY1	chr4	-	76416792	76416847	76415790	76415911	76416933	76416992	8.42143e-05	0.0103785	-0.102
ENSG00000169398.15	PTK2	chr8	-	141958764	141958822	141900641	141900868	141993940	141994254	8.43139e-05	0.0103785	0.359
ENSG00000266967.2	AARSD1	chr17	-	41103817	41103911	41102549	41102745	41105740	41105795	8.46253e-05	0.0103835	-0.061
ENSG00000145730.16	PAM	chr5	+	102309819	102310140	102296861	102296933	102325975	102326105	8.51446e-05	0.0104217	-0.215
ENSG00000198089.10	SFI1	chr22	+	31927043	31927115	31924675	31924849	31946239	31946334	8.52988e-05	0.0104217	-0.14
ENSG00000165813.12	C10orf118	chr10	-	115932899	115933024	115917312	115917439	115933773	115933961	8.55912e-05	0.0104325	-0.231
ENSG00000131374.10	TBC1D5	chr3	-	17627844	17628049	17616694	17616802	17665340	17665405	8.58956e-05	0.010458	-0.091
ENSG00000048052.17	HDAC9	chr7	+	18365134	18365215	18330063	18330138	18367071	18367235	8.73236e-05	0.0105828	-0.081
ENSG00000165689.12	SDCCAG3	chr9	-	139304541	139304691	139302277	139302390	139304779	139304979	8.78152e-05	0.0105878	0.11
ENSG00000115107.15	STEAP3	chr2	+	119988195	119988610	119981383	119981464	119996938	119997006	8.78715e-05	0.0105878	0.168
ENSG00000186141.4	POLR3C	chr1	-	145596903	145597054	145592616	145592771	145598535	145598573	8.81795e-05	0.0106062	-0.116
ENSG00000225205.1	AC093818.1	chr2	-	173377061	173377246	173360102	173360244	173420816	173421257	8.89546e-05	0.010676	-0.181
ENSG00000119787.9	ATL2	chr2	-	38581208	38581319	38546026	38546161	38604284	38604404	8.92611e-05	0.0106894	0.285
ENSG00000140105.13	WARS	chr14	-	100841619	100841743	100835423	100835595	100841847	100842081	8.9901e-05	0.0107542	-0.151
ENSG00000129646.9	QRICH2	chr17	-	74273243	74273391	74272760	74272848	74274069	74274270	9.01219e-05	0.0107689	-0.277
ENSG00000100888.8	CHD8	chr14	-	21905059	21905124	21899896	21900017	21905352	21905389	9.03406e-05	0.0107832	0.19
ENSG00000163378.9	EOGT	chr3	-	69058787	69059011	69057578	69057679	69061086	69061142	9.13141e-05	0.0108757	0.054
ENSG00000126581.8	BECN1	chr17	-	40965965	40966026	40962325	40962946	40967925	40968013	9.15743e-05	0.0108949	-0.13
ENSG00000108433.11	GOSR2	chr17	+	45008467	45008573	45006885	45006950	45015964	45016091	9.16817e-05	0.0108958	0.319
ENSG00000122417.11	ODF2L	chr1	-	86821027	86821071	86820456	86820542	86822126	86822227	9.27528e-05	0.0110104	-0.14
ENSG00000141540.6	TTYH2	chr17	+	72246407	72246496	72246074	72246167	72248372	72248427	9.28473e-05	0.0110104	0.092
ENSG00000015479.13	MATR3	chr5	+	138619219	138619290	138611797	138611839	138642927	138643403	9.41391e-05	0.0110804	-0.35
ENSG00000122203.10	KIAA1191	chr5	-	175782573	175782752	175775252	175775359	175786483	175786570	9.41466e-05	0.0110804	-0.086
ENSG00000140105.13	WARS	chr14	-	100840472	100840516	100835423	100835595	100841847	100842588	9.40814e-05	0.0110804	0.075
ENSG00000126705.9	AHDC1	chr1	-	27884815	27885041	27879584	27879696	27885216	27885394	9.45804e-05	0.0111195	0.114
ENSG00000156170.8	NDUFAF6	chr8	+	95987545	95987643	95970222	95970407	95988044	95988211	9.48316e-05	0.0111371	-0.242
ENSG00000182473.16	EXOC7	chr17	-	74086409	74086562	74085255	74085401	74087223	74087316	9.51842e-05	0.0111665	0.11
ENSG00000172262.7	ZNF131	chr5	+	43080001	43080056	43068217	43068319	43099121	43099440	9.64544e-05	0.0112793	-0.305
ENSG00000172775.12	FAM192A	chr16	-	57212413	57212764	57209450	57209612	57219732	57219951	9.75097e-05	0.0113659	-0.069
ENSG00000203778.3	FAM229B	chr6	+	112418243	112418404	112408801	112408923	112420472	112420611	9.85494e-05	0.0114484	-0.271
ENSG00000073921.13	PICALM	chr11	-	85779692	85779775	85742510	85742653	85780761	85780853	9.86324e-05	0.0114484	-0.059
ENSG00000136114.11	THSD1	chr13	-	52960162	52960321	52951304	52952924	52971366	52972329	9.93327e-05	0.0115174	-0.271
ENSG00000042429.6	MED17	chr11	+	93535000	93535138	93529575	93529706	93545018	93547861	0.000101695	0.0117425	-0.117
ENSG00000110075.10	PPP6R3	chr11	+	68272612	68272717	68228198	68228295	68282495	68282634	0.000101703	0.0117425	-0.098
ENSG00000114650.14	SCAP	chr3	-	47468936	47469157	47467486	47467659	47476497	47476627	0.000101967	0.0117606	0.102
ENSG00000150527.12	CTAGE5	chr14	+	39746137	39746159	39736614	39736726	39748540	39748562	0.000102574	0.0118182	-0.06
ENSG00000172775.12	FAM192A	chr16	-	57212413	57212764	57208531	57208600	57219942	57219976	0.000103143	0.0118587	-0.065
ENSG00000152818.14	UTRN	chr6	+	144837364	144837523	144835785	144835956	144837946	144838084	0.000103963	0.0119201	-0.06
ENSG00000089847.8	ANKRD24	chr19	+	4208760	4208798	4207777	4207965	4210054	4210135	0.000103958	0.0119201	0.162
ENSG00000105607.8	GCDH	chr19	+	13003130	13003248	13002644	13002788	13004296	13004467	0.000104003	0.0119201	0.427
ENSG00000137210.9	TMEM14B	chr6	+	10755374	10755465	10749854	10749931	10829239	10829438	0.000104164	0.011926	-0.129
ENSG00000198089.10	SFI1	chr22	+	31998592	31998771	31998197	31998279	32002313	32002416	0.000105602	0.012078	0.077
ENSG00000047578.8	KIAA0556	chr16	+	27710854	27710920	27709648	27709821	27712909	27713016	0.000105966	0.0121071	-0.18
ENSG00000171202.2	TMEM126A	chr11	+	85365084	85365278	85361292	85361385	85366637	85366752	0.000107152	0.0121811	-0.092
ENSG00000130429.8	ARPC1B	chr7	+	98974960	98975062	98974055	98974197	98983324	98983401	0.00010718	0.0121811	-0.057
ENSG00000237441.5	RGL2	chr6	-	33262464	33262539	33261275	33261843	33262753	33262822	0.000107236	0.0121811	-0.052
ENSG00000164978.13	NUDT2	chr9	+	34336226	34336339	34329503	34329597	34339021	34339164	0.000107283	0.0121811	0.102
ENSG00000143702.11	CEP170	chr1	-	243289679	243289796	243289219	243289436	243289914	243290000	0.000107634	0.0121986	-0.058
ENSG00000196517.7	SLC6A9	chr1	-	44476397	44476554	44475636	44475768	44489919	44490034	0.000108251	0.0122403	0.335
ENSG00000163069.8	SGCB	chr4	-	52898017	52898127	52895843	52896029	52899596	52899806	0.000108583	0.0122588	-0.07
ENSG00000174501.10	ANKRD36C	chr2	-	96578154	96578183	96577991	96578064	96580022	96580051	0.000109256	0.0123157	-0.318
ENSG00000172716.12	SLFN11	chr17	-	33693965	33694082	33689757	33690845	33700492	33700639	0.000110265	0.012392	-0.172
ENSG00000146576.8	C7orf26	chr7	+	6642294	6642383	6641731	6641771	6647167	6647228	0.000110796	0.0124381	-0.118
ENSG00000114126.13	TFDP2	chr3	-	141811867	141811969	141724282	141724386	141820576	141820683	0.000111001	0.0124484	-0.152
ENSG00000177409.7	SAMD9L	chr7	-	92776195	92776459	92774697	92775353	92777506	92777658	0.000111698	0.0124755	-0.292
ENSG00000118369.8	USP35	chr11	+	77910640	77910770	77908981	77909114	77911178	77911280	0.000111472	0.0124755	0.1
ENSG00000163297.12	ANTXR2	chr4	-	81018890	81019115	81018653	81018783	81042301	81042431	0.000112349	0.0125225	-0.319
ENSG00000196923.9	PDLIM7	chr5	-	176918404	176918421	176918010	176918147	176919405	176919436	0.000112254	0.0125225	0.231
ENSG00000220804.4	AC093642.5	chr2	+	243056789	243056892	243037037	243037178	243061115	243061208	0.00011275	0.0125545	-0.126
ENSG00000171121.12	KCNMB3	chr3	-	178960596	178961072	178957608	178957852	178962282	178962481	0.000113332	0.012579	-0.191
ENSG00000118308.10	LRMP	chr12	+	25215753	25215834	25205204	25205890	25216653	25216750	0.000113452	0.012579	-0.06
ENSG00000198369.5	SPRED2	chr2	-	65561738	65561907	65559120	65559185	65571852	65571933	0.000113423	0.012579	-0.054
ENSG00000131697.13	NPHP4	chr1	-	5924397	5924577	5923949	5924093	5926432	5926518	0.000114466	0.0126682	-0.096
ENSG00000101294.12	HM13	chr20	+	30155880	30156083	30149436	30149539	30156922	30157370	0.000114857	0.0126986	-0.14
ENSG00000064225.8	ST3GAL6	chr3	+	98492763	98492827	98491656	98491760	98503788	98503884	0.000115123	0.0127153	-0.143
ENSG00000141576.10	RNF157	chr17	-	74151332	74151398	74150363	74150409	74151642	74151815	0.000115541	0.0127407	-0.139
ENSG00000213689.5	TREX1	chr3	+	48508028	48508040	48507649	48507708	48508138	48509044	0.000116422	0.012807	0.111
ENSG00000175029.12	CTBP2	chr10	-	126811225	126811437	126799565	126799662	126848425	126848526	0.000117356	0.0128709	-0.093
ENSG00000077150.13	NFKB2	chr10	+	104158495	104158621	104158141	104158280	104159044	104159254	0.000117301	0.0128709	0.059
ENSG00000170629.10	DPY19L2P2	chr7	-	102920279	102920341	102918691	102918793	102920584	102920752	0.000121057	0.0132503	-0.182
ENSG00000169762.12	TAPT1	chr4	-	16198280	16198346	16192983	16193146	16215390	16215521	0.000122237	0.0133527	-0.289
ENSG00000090006.13	LTBP4	chr19	+	41129508	41129637	41128292	41128572	41131761	41131911	0.000123406	0.013467	-0.095
ENSG00000196209.8	SIRPB2	chr20	-	1457982	1458048	1454436	1454515	1460638	1460710	0.000123852	0.0134887	-0.457
ENSG00000138073.9	PREB	chr2	-	27356399	27356522	27355710	27355791	27357154	27357483	0.000123827	0.0134887	-0.081
ENSG00000064201.11	TSPAN32	chr11	+	2329965	2330040	2325336	2325434	2334883	2334938	0.00012451	0.0135335	-0.109
ENSG00000143119.8	CD53	chr1	+	111437581	111437677	111434013	111434093	111440430	111440514	0.000124853	0.0135438	-0.167
ENSG00000164073.5	MFSD8	chr4	-	128851837	128851972	128843014	128843118	128854139	128854248	0.00012557	0.0135947	-0.055
ENSG00000131389.12	SLC6A6	chr3	+	14509595	14509720	14509360	14509464	14513712	14513825	0.000127272	0.0137383	0.102
ENSG00000116698.16	SMG7	chr1	+	183481971	183482003	183441350	183441784	183485008	183485029	0.00012872	0.0138264	-0.067
ENSG00000106305.5	AIMP2	chr7	+	6054532	6054683	6048885	6049009	6054776	6054983	0.000129484	0.013854	-0.064
ENSG00000198496.6	NBR2	chr17	+	41283224	41283287	41277626	41277787	41284972	41285154	0.00012928	0.013854	0.059
ENSG00000088305.14	DNMT3B	chr20	+	31374307	31374433	31372563	31372665	31375035	31375257	0.000129449	0.013854	0.067
ENSG00000240057.1	RP11-572M11.4	chr3	+	112780633	112780857	112738378	112738553	112828948	112829322	0.000129331	0.013854	0.319
ENSG00000123219.8	CENPK	chr5	-	64850623	64850725	64838628	64838675	64857289	64857391	0.000130227	0.0138928	-0.191
ENSG00000134769.17	DTNA	chr18	+	32464691	32464740	32462032	32462165	32470263	32470507	0.00013056	0.0139147	0.062
ENSG00000269897.1	COMMD3-BMI1	chr10	+	22617062	22617108	22615818	22615915	22617976	22618027	0.000131308	0.0139267	-0.407
ENSG00000168096.10	ANKS3	chr16	-	4776659	4776781	4774750	4774832	4784156	4784205	0.000130986	0.0139267	-0.113
ENSG00000099917.13	MED15	chr22	+	20873164	20873282	20862343	20862731	20891403	20891470	0.000131208	0.0139267	-0.1
ENSG00000254319.1	RP11-134O21.1	chr8	-	2562745	2562817	2532237	2532353	2585869	2585929	0.000131102	0.0139267	-0.056
ENSG00000132600.12	PRMT7	chr16	+	68381533	68381581	68380023	68380183	68382244	68382334	0.000132762	0.0140291	-0.107
ENSG00000103145.6	HCFC1R1	chr16	-	3073474	3073531	3073233	3073362	3073847	3073969	0.000134453	0.0141778	-0.052
ENSG00000072364.8	AFF4	chr5	-	132273340	132273432	132272758	132272885	132298950	132299326	0.000134665	0.0141864	0.082
ENSG00000110171.14	TRIM3	chr11	-	6494313	6494478	6486794	6486962	6495020	6495153	0.000135076	0.0141888	-0.481
ENSG00000187008.2	PKD1L3	chr16	-	71997103	71997250	71988003	71988200	72001035	72001214	0.000135275	0.0141961	0.208
ENSG00000103254.5	FAM173A	chr16	+	772083	772134	771800	771941	772308	772601	0.000136343	0.0142945	0.059
ENSG00000121851.8	POLR3GL	chr1	-	145459651	145459781	145457547	145457604	145470321	145470387	0.000136638	0.014298	-0.104
ENSG00000100938.13	GMPR2	chr14	+	24703312	24703447	24702107	24702546	24704942	24705026	0.000137997	0.0143876	0.235
ENSG00000204406.7	MBD5	chr2	+	148779216	148779253	148778579	148778615	148936268	148936362	0.000138581	0.0144323	0.237
ENSG00000213999.11	MEF2B	chr19	-	19257550	19257684	19257363	19257457	19257844	19257992	0.000139419	0.014492	-0.073
ENSG00000087263.12	OGFOD1	chr16	+	56488685	56488833	56487174	56487320	56492424	56492506	0.000142631	0.0147698	0.179
ENSG00000126790.7	L3HYPDH	chr14	-	59941156	59941244	59939578	59939808	59942586	59942724	0.000143809	0.0148777	-0.058
ENSG00000185513.10	L3MBTL1	chr20	+	42169392	42169455	42167614	42168948	42176786	42176946	0.000144362	0.0149208	0.113
ENSG00000170629.10	DPY19L2P2	chr7	-	102918691	102918793	102918060	102918085	102920279	102920341	0.00014521	0.0149547	-0.213
ENSG00000169992.5	NLGN2	chr17	+	7315475	7315526	7311330	7312031	7317662	7317812	0.000144906	0.0149547	-0.124
ENSG00000143373.13	ZNF687	chr1	+	151257681	151258550	151254787	151254871	151258750	151260882	0.00014507	0.0149547	0.064
ENSG00000166169.12	POLL	chr10	-	103344358	103344477	103343264	103343438	103344634	103344676	0.000145373	0.0149547	0.271
ENSG00000055955.11	ITIH4	chr3	-	52852067	52852184	52850899	52851074	52852272	52852299	0.000145242	0.0149547	0.273
ENSG00000178104.15	PDE4DIP	chr1	-	144867920	144868172	144866591	144866723	144873876	144874029	0.000146112	0.0150166	-0.098
ENSG00000148737.11	TCF7L2	chr10	+	114849158	114849299	114799783	114799885	114900942	114901075	0.000146901	0.015057	-0.115
ENSG00000203875.6	SNHG5	chr6	-	86387512	86387593	86387046	86387210	86387853	86387906	0.000146887	0.015057	-0.051
ENSG00000165275.5	TRMT10B	chr9	+	37762539	37762682	37761899	37762114	37763625	37763754	0.000147352	0.0150761	-0.089
ENSG00000095787.17	WAC	chr10	+	28884661	28884970	28879648	28879761	28897114	28897360	0.000148462	0.0151434	-0.058
ENSG00000117360.8	PRPF3	chr1	+	150300015	150300111	150298208	150298339	150300778	150300925	0.000148641	0.0151434	-0.056
ENSG00000203875.6	SNHG5	chr6	-	86387512	86387750	86387141	86387210	86387853	86388440	0.000148729	0.0151434	-0.053
ENSG00000169592.10	INO80E	chr16	+	30014756	30014847	30012734	30012851	30014970	30014991	0.000148638	0.0151434	0.519
ENSG00000157741.10	UBN2	chr7	+	138966750	138966801	138964063	138964106	138967769	138969320	0.000149216	0.0151695	-0.088
ENSG00000105750.10	ZNF85	chr19	+	21116829	21116956	21106027	21106209	21117754	21117853	0.000149918	0.0152078	-0.055
ENSG00000186654.16	PRR5	chr22	+	45128130	45128271	45122456	45122514	45132651	45133542	0.00015143	0.0153186	-0.278
ENSG00000185379.16	RAD51D	chr17	-	33434006	33434141	33433204	33433500	33445519	33445638	0.000151341	0.0153186	0.073
ENSG00000229140.4	CCDC26	chr8	-	130411759	130411930	130382552	130382623	130692173	130692485	0.000152975	0.0154606	-0.093
ENSG00000114867.15	EIF4G1	chr3	+	184033550	184033644	184032339	184032462	184035108	184035285	0.000153209	0.01547	0.111
ENSG00000111325.12	OGFOD2	chr12	+	123462527	123462604	123461417	123461517	123462906	123463094	0.000154446	0.0155805	-0.141
ENSG00000165275.5	TRMT10B	chr9	+	37763625	37763750	37761899	37762114	37768072	37768225	0.000155796	0.015659	-0.115
ENSG00000171475.9	WIPF2	chr17	+	38418776	38418893	38416786	38416919	38430041	38430251	0.000156255	0.0156907	-0.062
ENSG00000219626.4	FAM228B	chr2	+	24369617	24369705	24362239	24362320	24369799	24369956	0.000158104	0.0158618	-0.054
ENSG00000108848.11	LUC7L3	chr17	+	48826579	48826705	48825749	48825777	48827861	48827911	0.000159177	0.0159549	0.199
ENSG00000161996.13	WDR90	chr16	+	712672	712844	712219	712331	715678	715801	0.000162956	0.0162459	-0.078
ENSG00000048052.17	HDAC9	chr7	+	18434737	18434806	18329714	18330138	18535884	18535947	0.000162971	0.0162459	0.07
ENSG00000165322.13	ARHGAP12	chr10	-	32128564	32128639	32120666	32120728	32132388	32132514	0.000163198	0.0162537	-0.069
ENSG00000162852.9	CNST	chr1	+	246784730	246784936	246754813	246755243	246795195	246795226	0.00016371	0.0162603	-0.059
ENSG00000160570.9	DEDD2	chr19	-	42720831	42721197	42719284	42719404	42724225	42724275	0.000163591	0.0162603	0.059
ENSG00000188130.9	MAPK12	chr22	-	50695216	50695393	50695027	50695075	50696671	50696730	0.000165346	0.016393	0.258
ENSG00000119772.12	DNMT3A	chr2	-	25472525	25472593	25470905	25471121	25474780	25474952	0.000165735	0.0164092	0.374
ENSG00000142599.13	RERE	chr1	-	8852462	8852647	8716031	8716500	8877218	8877524	0.000166921	0.0164894	0.073
ENSG00000228486.5	AC017099.3	chr2	+	98305357	98305456	98292307	98292391	98306718	98306790	0.000167858	0.0165254	-0.117
ENSG00000026559.9	KCNG1	chr20	-	49628895	49628953	49625218	49626901	49639190	49639617	0.000168032	0.0165254	0.199
ENSG00000074657.9	ZNF532	chr18	+	56532535	56532617	56530793	56530918	56532701	56532811	0.000169125	0.0165875	-0.07
ENSG00000101473.12	ACOT8	chr20	-	44472165	44472411	44470364	44470595	44472901	44473059	0.000169708	0.0166048	-0.059
ENSG00000214425.2	LRRC37A4P	chr17	-	43616528	43616609	43598672	43598791	43620129	43620201	0.000169758	0.0166048	0.324
ENSG00000167103.7	PIP5KL1	chr9	-	130688145	130688258	130687385	130687539	130689431	130689487	0.000171724	0.0167373	0.148
ENSG00000175274.14	TP53I11	chr11	-	44962553	44962628	44959757	44959917	44972427	44972840	0.000171965	0.0167459	-0.515
ENSG00000196923.9	PDLIM7	chr5	-	176918807	176918977	176918010	176918147	176919405	176919436	0.000173364	0.0168373	0.051
ENSG00000064607.12	SUGP2	chr19	-	19114304	19114417	19105174	19106089	19114976	19115078	0.000173703	0.0168552	-0.182
ENSG00000119397.12	CNTRL	chr9	+	123907521	123907663	123906180	123906360	123910949	123911139	0.000174229	0.0168913	0.161
ENSG00000213963.2	AC074286.1	chr2	-	178213049	178213203	178203325	178203427	178257300	178257419	0.00017493	0.0169443	0.061
ENSG00000036549.8	ZZZ3	chr1	-	78107068	78107131	78105133	78105287	78107206	78107340	0.000175568	0.0169759	-0.066
ENSG00000183091.15	NEB	chr2	-	152350674	152350767	152348900	152349008	152361991	152362084	0.000175739	0.0169775	-0.503
ENSG00000162769.8	FLVCR1	chr1	+	213061232	213061343	213058634	213058738	213061830	213061936	0.000176807	0.0170506	-0.179
ENSG00000176020.7	AMIGO3	chr3	-	49759663	49759791	49759397	49759580	49760028	49760187	0.000177984	0.0171188	0.058
ENSG00000266714.2	MYO15B	chr17	+	73588544	73588622	73588318	73588382	73588759	73588921	0.000177936	0.0171188	0.083
ENSG00000067836.8	ROGDI	chr16	-	4851050	4851322	4850498	4850579	4851503	4851586	0.000178591	0.0171544	-0.131
ENSG00000137101.8	CD72	chr9	-	35618218	35618434	35618010	35618118	35619508	35619539	0.000178667	0.0171544	-0.1
ENSG00000111711.5	GOLT1B	chr12	+	21660050	21660085	21659818	21659910	21660877	21661043	0.000179319	0.0172019	-0.469
ENSG00000233038.1	AC011899.9	chr7	+	157648618	157648822	157647220	157647567	157655236	157658784	0.000179764	0.0172295	0.34
ENSG00000233024.3	RP11-1212A22.4	chr16	-	18470592	18470719	18468688	18468926	18470809	18471020	0.000180792	0.0172977	-0.054
ENSG00000151773.8	CCDC122	chr13	-	44442829	44442939	44433807	44434206	44443466	44443625	0.000181147	0.0173015	0.297
ENSG00000173542.4	MOB1B	chr4	+	71808539	71808599	71768042	71768267	71816416	71816528	0.00018103	0.0173015	0.355
ENSG00000196235.9	SUPT5H	chr19	+	39948933	39948945	39948314	39948380	39949457	39949527	0.000181526	0.0173226	-0.051
ENSG00000090097.16	PCBP4	chr3	-	51996825	51996908	51995956	51996104	52001341	52001450	0.000182278	0.0173439	-0.34
ENSG00000176273.10	SLC35G1	chr10	+	95658327	95658508	95653747	95653917	95660508	95662490	0.000182384	0.0173439	-0.086
ENSG00000158402.14	CDC25C	chr5	-	137626327	137626429	137622857	137622956	137627658	137627803	0.000183402	0.0174256	-0.066
ENSG00000186654.16	PRR5	chr22	+	45127558	45127701	45122456	45122514	45128130	45128197	0.000184234	0.0174895	-0.076
ENSG00000135111.10	TBX3	chr12	-	115117717	115117777	115117309	115117456	115118683	115118951	0.000185021	0.0175337	0.206
ENSG00000148356.9	LRSAM1	chr9	+	130248683	130248973	130248014	130248114	130249773	130249839	0.000185903	0.0175868	-0.238
ENSG00000162341.11	TPCN2	chr11	+	68834970	68835073	68830351	68830458	68837897	68837963	0.000187803	0.0177359	-0.061
ENSG00000132549.14	VPS13B	chr8	+	100519997	100520139	100515063	100515178	100523331	100523740	0.000191376	0.0180422	-0.281
ENSG00000140650.7	PMM2	chr16	+	8896117	8896246	8895937	8896002	8898623	8898700	0.000192664	0.0181325	0.333
ENSG00000183458.9	RP11-958N24.1	chr16	+	15013101	15013285	15012311	15012983	15014128	15014244	0.000193256	0.0181725	-0.111
ENSG00000163374.15	YY1AP1	chr1	-	155657861	155657992	155649199	155649303	155658720	155658791	0.000194527	0.0182096	-0.09
ENSG00000171466.5	ZNF562	chr19	-	9767222	9767329	9759329	9764557	9768684	9768811	0.000194144	0.0182096	-0.064
ENSG00000196236.8	XPNPEP3	chr22	+	41266051	41266143	41265002	41265119	41277773	41278181	0.000194648	0.0182096	-0.055
ENSG00000151883.12	PARP8	chr5	+	50073902	50073963	50058981	50059076	50084356	50084423	0.000194281	0.0182096	-0.053
ENSG00000244627.1	RP3-449O17.1	chr22	-	38765990	38766050	38759058	38759109	38776374	38776428	0.000195312	0.0182405	-0.205
ENSG00000244627.1	RP3-449O17.1	chr22	-	38759058	38759109	38757385	38757565	38776374	38776428	0.000196001	0.0182737	0.062
ENSG00000197935.6	ZNF311	chr6	-	28967263	28967390	28966510	28966615	28967732	28967824	0.000195987	0.0182737	0.122
ENSG00000160223.12	ICOSLG	chr21	-	45658330	45658371	45655154	45655445	45660686	45660723	0.000196457	0.0183006	0.095
ENSG00000242259.4	C22orf39	chr22	-	19348759	19348864	19343752	19343811	19363153	19363315	0.000197448	0.0183461	-0.226
ENSG00000102900.8	NUP93	chr16	+	56872863	56872981	56870512	56870629	56875616	56875745	0.000197302	0.0183461	0.38
ENSG00000183426.11	NPIPA1	chr16	+	15029201	15029254	15029016	15029133	15035668	15035797	0.000198085	0.0183772	0.146
ENSG00000053918.11	KCNQ1	chr11	+	2798215	2798262	2797189	2797284	2799205	2799267	0.000199592	0.0184981	-0.078
ENSG00000011600.7	TYROBP	chr19	-	36398631	36398664	36398195	36398482	36399076	36399197	0.0002005	0.0185666	0.068
ENSG00000106868.12	SUSD1	chr9	-	114864455	114864565	114842353	114842445	114873933	114874120	0.000200723	0.0185715	0.084
ENSG00000198815.4	FOXJ3	chr1	-	42671432	42671534	42664772	42664901	42693553	42693637	0.000201802	0.0186398	-0.061
ENSG00000111247.10	RAD51AP1	chr12	+	4665518	4665716	4662148	4662255	4668022	4668185	0.000202225	0.0186632	-0.055
ENSG00000171045.10	TSNARE1	chr8	-	143396363	143396450	143381846	143382008	143412261	143412331	0.000202891	0.0187089	-0.532
ENSG00000197446.4	CYP2F1	chr19	+	41630623	41630811	41628726	41628868	41633805	41634159	0.000205754	0.0188982	0.22
ENSG00000103313.7	MEFV	chr16	-	3301956	3302049	3299430	3299780	3304157	3304790	0.000206243	0.0189064	0.059
ENSG00000166839.12	ANKDD1A	chr15	+	65243168	65243448	65242061	65242193	65249441	65251033	0.000207127	0.0189557	-0.076
ENSG00000102921.3	N4BP1	chr16	-	48585296	48585393	48581917	48582025	48587449	48587580	0.00020732	0.0189575	0.054
ENSG00000135424.11	ITGA7	chr12	-	56094917	56094938	56094455	56094755	56096655	56096735	0.000207622	0.0189619	-0.077
ENSG00000139323.9	POC1B	chr12	-	89890815	89891119	89885851	89885892	89919657	89919777	0.000207714	0.0189619	0.158
ENSG00000106479.6	ZNF862	chr7	+	149557471	149559583	149556510	149556615	149561197	149564568	0.000208379	0.0190068	-0.163
ENSG00000186166.4	CCDC84	chr11	+	118882858	118882964	118882648	118882713	118885703	118885793	0.00020893	0.0190412	-0.071
ENSG00000163507.9	KIAA1524	chr3	-	108300954	108300985	108300261	108300358	108301823	108301930	0.000212057	0.019246	-0.102
ENSG00000112039.3	FANCE	chr6	+	35430565	35430691	35427458	35427537	35434020	35434880	0.000212956	0.0193116	-0.061
ENSG00000121577.9	POPDC2	chr3	-	119373351	119373460	119366965	119367515	119378779	119378910	0.000214106	0.0193998	0.266
ENSG00000046651.10	OFD1	chrX	+	13773269	13773361	13769367	13769487	13774696	13774886	0.000216295	0.019582	-0.067
ENSG00000221817.5	RP11-137L10.6	chr10	+	75258407	75258625	75256571	75256664	75259352	75259445	0.000218074	0.0197267	0.195
ENSG00000178852.11	EFCAB13	chr17	+	45401819	45401889	45401390	45401465	45403591	45403753	0.000218478	0.0197469	0.119
ENSG00000140105.13	WARS	chr14	-	100840472	100840602	100828044	100828258	100841847	100841944	0.000221083	0.0199494	-0.405
ENSG00000160953.10	MUM1	chr19	+	1358586	1358692	1358392	1358463	1360134	1360597	0.00022344	0.0201123	0.057
ENSG00000140743.3	CDR2	chr16	-	22433481	22433535	22361021	22361170	22441116	22441269	0.000224039	0.0201166	-0.279
ENSG00000189144.9	ZNF573	chr19	-	38231541	38231611	38230806	38231095	38249686	38249779	0.000224932	0.0201802	0.338
ENSG00000155984.10	TMEM185A	chrX	-	148692969	148693146	148685652	148685736	148713225	148713381	0.000225702	0.0202327	-0.064
ENSG00000187987.5	ZSCAN23	chr6	-	28403635	28404120	28402228	28402855	28411175	28411244	0.000226039	0.0202438	-0.226
ENSG00000113108.13	APBB3	chr5	-	139942247	139942308	139941937	139942084	139943178	139943255	0.000226642	0.0202507	0.092
ENSG00000197147.8	LRRC8B	chr1	+	90015473	90015530	89990461	89990581	90024269	90024595	0.000226522	0.0202507	0.168
ENSG00000163939.14	PBRM1	chr3	-	52716107	52716249	52713589	52713742	52719451	52719594	0.000228899	0.0204269	0.071
ENSG00000100379.13	KCTD17	chr22	+	37457143	37457215	37455352	37455478	37457578	37457669	0.000229298	0.020438	-0.212
ENSG00000152380.5	FAM151B	chr5	+	79797610	79797736	79783787	79783967	79809422	79809480	0.000230343	0.0205144	-0.087
ENSG00000172081.9	MOB3A	chr19	-	2095239	2095322	2085173	2085324	2096224	2096269	0.000230693	0.0205265	-0.142
ENSG00000077264.10	PAK3	chrX	+	110340617	110340684	110339587	110339643	110340802	110340912	0.000230854	0.0205265	0.167
ENSG00000067836.8	ROGDI	chr16	-	4851267	4851322	4850498	4850579	4851503	4851586	0.000231297	0.0205492	-0.066
ENSG00000042429.6	MED17	chr11	+	93540683	93540801	93529575	93529706	93545018	93545394	0.000231553	0.0205552	-0.219
ENSG00000085999.7	RAD54L	chr1	+	46714015	46714080	46713366	46713418	46714183	46714270	0.000233884	0.0207118	-0.137
ENSG00000140471.12	LINS	chr15	-	101126428	101126537	101120648	101121150	101142325	101142389	0.000235464	0.0208181	-0.066
ENSG00000205592.9	MUC19	chr12	+	40930241	40930286	40929005	40929059	40930724	40930778	0.000236112	0.0208585	0.322
ENSG00000149294.12	NCAM1	chr11	+	113117089	113117092	113105754	113105886	113126598	113126723	0.000238363	0.0210403	0.104
ENSG00000179526.12	SHARPIN	chr8	-	145153983	145154108	145153535	145153897	145154179	145154225	0.000239257	0.0211022	-0.053
ENSG00000166704.7	ZNF606	chr19	-	58511175	58511264	58499962	58500089	58512050	58512107	0.000241159	0.0211846	0.075
ENSG00000160323.14	ADAMTS13	chr9	+	136323031	136323216	136321664	136321841	136324095	136324507	0.000241837	0.0212102	0.347
ENSG00000205664.6	RP11-706O15.1	chrX	-	3736482	3736541	3735568	3735819	3746546	3746900	0.000242391	0.0212342	-0.084
ENSG00000058866.10	DGKG	chr3	-	185983035	185983095	185975642	185975728	185985473	185985566	0.000243236	0.0212708	-0.28
ENSG00000151743.6	AMN1	chr12	-	31867374	31867565	31862226	31862359	31881904	31881944	0.000243306	0.0212708	0.096
ENSG00000250903.4	GMDS-AS1	chr6	+	2263834	2263918	2249070	2249160	2398810	2398981	0.00024452	0.0213429	0.154
ENSG00000149636.11	DSN1	chr20	-	35399827	35399876	35399275	35399596	35401796	35402154	0.000245996	0.0213955	-0.052
ENSG00000166323.8	C11orf65	chr11	-	108276155	108276286	108263934	108264105	108332205	108332295	0.000246993	0.021439	0.266
ENSG00000169814.8	BTD	chr3	+	15643643	15643817	15643277	15643401	15674097	15674373	0.000247253	0.0214446	0.128
ENSG00000120664.6	SPG20OS	chr13	+	36939636	36939741	36920567	36920644	36939866	36939980	0.000247672	0.021447	-0.192
ENSG00000166762.12	CATSPER2	chr15	-	43956615	43956741	43939546	43939665	43960225	43960316	0.000248131	0.0214478	-0.14
ENSG00000096093.10	EFHC1	chr6	+	52329692	52329913	52317485	52319085	52334130	52334271	0.00024827	0.0214478	0.079
ENSG00000189011.9	AC138783.12	chr7	-	74707613	74707702	74702427	74703024	74710752	74710936	0.000248259	0.0214478	0.141
ENSG00000087903.8	RFX2	chr19	-	6008116	6008235	6007700	6007813	6010146	6010262	0.000249838	0.0215493	-0.075
ENSG00000229358.3	DPY19L1P1	chr7	-	32662972	32663051	32660624	32660684	32672154	32672232	0.000250251	0.0215679	0.167
ENSG00000153310.14	FAM49B	chr8	-	130892621	130892704	130891634	130891717	130908994	130909100	0.000253489	0.0217784	0.461
ENSG00000106070.13	GRB10	chr7	-	50799968	50800065	50742132	50742355	50860920	50861129	0.000254751	0.0218183	-0.249
ENSG00000102125.11	TAZ	chrX	+	153642437	153642527	153641818	153641904	153648370	153648433	0.000254665	0.0218183	0.111
ENSG00000171097.9	CCBL1	chr9	-	131600496	131600646	131600329	131600416	131604932	131605080	0.000255586	0.0218385	-0.059
ENSG00000132478.5	UNK	chr17	+	73788393	73788559	73787840	73788100	73805840	73806050	0.000255255	0.0218385	-0.057
ENSG00000175265.13	GOLGA8A	chr15	-	34727583	34727672	34699724	34699936	34729598	34729667	0.000256156	0.0218702	-0.093
ENSG00000108100.13	CCNY	chr10	+	35805450	35805551	35625801	35626135	35818900	35818958	0.000256392	0.0218732	-0.211
ENSG00000122359.13	ANXA11	chr10	-	81940696	81940892	81932562	81932625	81965098	81965328	0.000256884	0.0218856	-0.058
ENSG00000187688.10	TRPV2	chr17	+	16338172	16338283	16336887	16337012	16340102	16340315	0.000256936	0.0218856	-0.055
ENSG00000121903.10	ZSCAN20	chr1	+	33954714	33954791	33954064	33954251	33956624	33957302	0.000258788	0.022009	-0.318
ENSG00000172425.6	TTC36	chr11	+	118398636	118398771	118398186	118398327	118399317	118399506	0.000259099	0.0220184	0.233
ENSG00000188002.6	RP11-43F13.1	chr5	-	1632758	1632866	1630523	1630681	1632959	1633021	0.000263728	0.02225	-0.279
ENSG00000113163.11	COL4A3BP	chr5	-	74695134	74695212	74685416	74685512	74696029	74696122	0.000263464	0.02225	0.06
ENSG00000107560.6	RAB11FIP2	chr10	-	119793492	119793552	119774575	119774621	119798482	119798951	0.000263805	0.02225	0.078
ENSG00000132470.9	ITGB4	chr17	+	73751135	73751294	73750656	73750896	73751781	73751931	0.000264874	0.0223014	0.244
ENSG00000183570.12	PCBP3	chr21	+	47088787	47088946	47063623	47063782	47155305	47155343	0.000267461	0.0224673	-0.391
ENSG00000164751.10	PEX2	chr8	-	77900542	77900574	77898422	77898532	77912225	77912368	0.00026813	0.0225062	-0.062
ENSG00000164953.11	TMEM67	chr8	+	94793101	94793210	94792820	94792975	94793885	94793972	0.000269515	0.0225879	0.109
ENSG00000203546.3	RP11-176H8.1	chr14	-	31897349	31897394	31872055	31872255	31922480	31922550	0.000271279	0.0226947	-0.39
ENSG00000090659.13	CD209	chr19	-	7809826	7809978	7808060	7808126	7810403	7810460	0.00027252	0.0227684	-0.263
ENSG00000172113.4	NME6	chr3	-	48337608	48337726	48336564	48336725	48339916	48340013	0.00027271	0.0227684	-0.076
ENSG00000186638.11	KIF24	chr9	-	34271806	34271928	34263098	34263170	34286614	34286702	0.00027429	0.0228481	-0.08
ENSG00000095906.12	NUBP2	chr16	+	1833877	1834067	1832990	1833037	1837677	1837832	0.000274909	0.0228822	-0.24
ENSG00000127616.13	SMARCA4	chr19	+	11091452	11091528	11088328	11088491	11094799	11095049	0.000275662	0.0229101	-0.148
ENSG00000248309.1	MEF2C-AS1	chr5	+	88201518	88201590	88201025	88201087	88243952	88244032	0.000277539	0.0230486	-0.311
ENSG00000172456.12	FGGY	chr1	+	60139710	60139805	60125890	60125965	60223602	60223664	0.000279526	0.0231784	-0.14
ENSG00000185379.16	RAD51D	chr17	-	33434006	33434080	33433404	33433500	33434384	33434466	0.000279332	0.0231784	0.194
ENSG00000104365.9	IKBKB	chr8	+	42146151	42146246	42128980	42129723	42147673	42147791	0.000281166	0.0232562	-0.075
ENSG00000142632.12	ARHGEF19	chr1	-	16525644	16525749	16524348	16525239	16531253	16531414	0.000280794	0.0232562	-0.07
ENSG00000137497.13	NUMA1	chr11	-	71723446	71723488	71721831	71721900	71727453	71727576	0.00028172	0.0232722	-0.076
ENSG00000168675.14	LDLRAD4	chr18	+	13484035	13484118	13465013	13465110	13621115	13621269	0.000282907	0.0233351	-0.205
ENSG00000065802.7	ASB1	chr2	+	239341953	239342088	239335470	239335760	239342189	239342336	0.000285093	0.0234799	-0.065
ENSG00000168890.9	TMEM150A	chr2	-	85828557	85828605	85828143	85828230	85829006	85829187	0.000285647	0.0235079	0.062
ENSG00000151687.10	ANKAR	chr2	+	190557799	190557903	190554252	190554690	190559706	190559887	0.000286032	0.0235219	0.388
ENSG00000123427.11	METTL21B	chr12	+	58168411	58168550	58166799	58166856	58174037	58174213	0.000290276	0.0238351	0.266
ENSG00000138674.12	SEC31A	chr4	-	83801951	83802075	83796879	83796975	83812240	83812331	0.000292445	0.0239952	-0.121
ENSG00000161647.14	MPP3	chr17	-	41898229	41898426	41895286	41895478	41901298	41901373	0.000295355	0.0242158	0.089
ENSG00000168237.13	GLYCTK	chr3	+	52325762	52325938	52324975	52325127	52327061	52327150	0.000296841	0.0242958	-0.099
ENSG00000148180.12	GSN	chr9	+	124060043	124060120	124048400	124048463	124064240	124064427	0.000297638	0.0242958	-0.066
ENSG00000187024.9	PTRH1	chr9	-	130476881	130476981	130457205	130457420	130477253	130477473	0.000297486	0.0242958	0.065
ENSG00000138674.12	SEC31A	chr4	-	83803010	83803090	83796879	83796975	83812240	83812331	0.000299848	0.0244196	-0.104
ENSG00000214022.7	REPIN1	chr7	+	150067848	150067973	150065878	150066030	150068319	150068721	0.000300642	0.024466	0.114
ENSG00000163939.14	PBRM1	chr3	-	52592264	52592429	52584762	52584833	52595782	52595984	0.000302771	0.0245844	-0.079
ENSG00000159314.7	ARHGAP27	chr17	-	43509581	43509715	43508986	43509118	43510117	43510282	0.000304167	0.0246795	-0.088
ENSG00000164066.8	INTU	chr4	+	128606596	128606724	128605563	128605641	128608895	128609022	0.000305433	0.0247455	0.227
ENSG00000076108.7	BAZ2A	chr12	-	57024559	57024649	57011178	57011316	57029965	57030077	0.000306692	0.0248291	0.191
ENSG00000231889.3	TRAF3IP2-AS1	chr6	+	111805946	111806064	111804764	111804868	111812170	111814206	0.000309654	0.0250504	0.309
ENSG00000173715.11	C11orf80	chr11	+	66606602	66606678	66605840	66605916	66610319	66610540	0.000314228	0.0253642	-0.126
ENSG00000074370.13	ATP2A3	chr17	-	3831520	3831621	3831274	3831332	3831956	3832074	0.000315767	0.0253948	-0.146
ENSG00000065559.10	MAP2K4	chr17	+	11958205	11958308	11924140	11924318	11998891	11999011	0.000315651	0.0253948	0.109
ENSG00000113763.6	UNC5A	chr5	+	176296614	176296782	176295784	176295965	176297370	176297535	0.000316006	0.0253954	0.069
ENSG00000158806.9	NPM2	chr8	+	21883157	21883283	21882946	21883032	21890640	21890667	0.000317751	0.025405	-0.098
ENSG00000071054.11	MAP4K4	chr2	+	102477286	102477448	102460562	102460773	102481391	102481498	0.000317465	0.025405	-0.06
ENSG00000005810.13	MYCBP2	chr13	-	77703290	77703365	77700452	77700677	77713330	77713471	0.000316823	0.025405	0.058
ENSG00000161800.8	RACGAP1	chr12	-	50414844	50414960	50410413	50410498	50419110	50419246	0.000316609	0.025405	0.117
ENSG00000249240.2	AC069368.3	chr15	+	65214119	65214218	65153675	65153774	65223019	65223118	0.000317633	0.025405	0.205
ENSG00000148672.7	GLUD1	chr10	-	88849318	88849545	88836332	88836413	88851327	88851380	0.000318658	0.0254508	0.105
ENSG00000188690.8	UROS	chr10	-	127481147	127481313	127477851	127477932	127483448	127483547	0.000318789	0.0254508	0.145
ENSG00000157869.10	RAB28	chr4	-	13371494	13371589	13362977	13363257	13378168	13378246	0.000319988	0.0255279	-0.409
ENSG00000113761.7	ZNF346	chr5	+	176471392	176471534	176468126	176468230	176489058	176489152	0.000320593	0.0255575	-0.176
ENSG00000163703.13	CRELD1	chr3	+	9979245	9979356	9976518	9976601	9982533	9982710	0.000321628	0.0255842	0.177
ENSG00000181722.11	ZBTB20	chr3	-	114429114	114429160	114412374	114412422	114519947	114520021	0.000322357	0.0256235	-0.189
ENSG00000108021.15	FAM208B	chr10	+	5756097	5756170	5754785	5754881	5762506	5762631	0.000322834	0.0256428	-0.102
ENSG00000101639.14	CEP192	chr18	+	13040828	13040955	13030463	13030607	13048857	13049680	0.000323717	0.0256902	-0.188
ENSG00000015479.13	MATR3	chr5	+	138627660	138627763	138614739	138614818	138629141	138629264	0.00032478	0.0257228	0.053
ENSG00000140521.7	POLG	chr15	-	89865972	89866133	89862458	89862581	89867045	89867132	0.000325602	0.0257506	-0.066
ENSG00000181135.11	ZNF707	chr8	+	144770163	144770237	144766650	144766712	144771373	144771471	0.000326476	0.0257825	0.081
ENSG00000187790.6	FANCM	chr14	+	45609834	45609912	45606271	45606444	45618039	45618198	0.000327615	0.0258537	-0.06
ENSG00000249859.3	PVT1	chr8	+	129094998	129095094	129082405	129082607	129108763	129108902	0.000331258	0.026033	-0.066
ENSG00000163159.7	VPS72	chr1	-	151144108	151144239	151142462	151142579	151144743	151144833	0.000331808	0.026033	0.263
ENSG00000166169.12	POLL	chr10	-	103343264	103343438	103340004	103340173	103347960	103347976	0.000331633	0.026033	0.372
ENSG00000197619.9	ZNF615	chr19	-	52510545	52510583	52506949	52507153	52511393	52511453	0.000332028	0.026033	0.422
ENSG00000205664.6	RP11-706O15.1	chrX	-	3736697	3736744	3736482	3736541	3743128	3743244	0.000332308	0.0260364	-0.184
ENSG00000148985.15	PGAP2	chr11	+	3832479	3832654	3829523	3829545	3845112	3845365	0.00033302	0.0260734	-0.125
ENSG00000071564.10	TCF3	chr19	-	1632036	1632115	1627357	1627425	1646353	1646426	0.000333916	0.0261249	-0.063
ENSG00000090659.13	CD209	chr19	-	7811345	7811417	7810403	7810973	7812191	7812251	0.000334191	0.0261278	0.478
ENSG00000175029.12	CTBP2	chr10	-	126822080	126822181	126691906	126692061	126847203	126847285	0.000335206	0.0261884	-0.291
ENSG00000089091.12	DZANK1	chr20	-	18440796	18440950	18435886	18436005	18445893	18446021	0.000335958	0.0262098	0.161
ENSG00000040275.12	SPDL1	chr5	+	169014202	169014376	169010639	169010893	169015397	169015579	0.000337099	0.0262613	0.072
ENSG00000129187.10	DCTD	chr4	-	183837033	183837041	183836613	183836728	183837438	183837692	0.000337733	0.0262867	-0.199
ENSG00000162430.12	SEPN1	chr1	+	26128506	26128608	26126666	26126904	26131632	26131766	0.000337986	0.0262867	-0.149
ENSG00000168096.10	ANKS3	chr16	-	4779980	4780152	4774750	4774832	4784156	4784193	0.000338146	0.0262867	-0.097
ENSG00000123349.9	PFDN5	chr12	+	53690027	53690059	53689074	53689423	53691633	53691708	0.000338807	0.0263194	0.074
ENSG00000186654.16	PRR5	chr22	+	45127614	45127701	45122456	45122514	45128130	45128271	0.00033986	0.0263481	-0.066
ENSG00000133794.13	ARNTL	chr11	+	13376779	13376843	13375847	13375995	13378285	13378324	0.000339897	0.0263481	0.069
ENSG00000183401.7	CCDC159	chr19	+	11462581	11462649	11460793	11460875	11462732	11462809	0.000340507	0.026358	-0.119
ENSG00000065802.7	ASB1	chr2	+	239344351	239344654	239341954	239342336	239352982	239353016	0.000340456	0.026358	-0.055
ENSG00000117016.5	RIMS3	chr1	-	41107380	41107628	41101587	41101729	41113339	41113434	0.000341339	0.0263618	-0.151
ENSG00000130755.8	GMFG	chr19	-	39820187	39820266	39819639	39819713	39826074	39826171	0.000341073	0.0263618	-0.095
ENSG00000172456.12	FGGY	chr1	+	59797514	59797704	59787207	59787422	59811918	59812041	0.00034152	0.0263618	0.366
ENSG00000188818.8	ZDHHC11	chr5	-	821257	821475	819639	819727	821975	822010	0.000341985	0.0263791	-0.083
ENSG00000132359.9	RAP1GAP2	chr17	+	2908662	2908734	2901514	2901670	2909248	2909335	0.000343498	0.0264771	-0.051
ENSG00000144040.8	SFXN5	chr2	-	73198698	73198814	73188259	73188377	73215386	73215477	0.000344499	0.026517	0.212
ENSG00000172965.10	MIR4435-1HG	chr2	-	112005724	112005818	111965352	111966238	112101637	112101814	0.000344363	0.026517	0.305
ENSG00000165138.12	ANKS6	chr9	-	101552385	101552888	101547113	101547158	101558414	101558794	0.000345562	0.0265801	-0.116
ENSG00000254462.1	TMX2-CTNND1	chr11	+	57556508	57556627	57505079	57505140	57558856	57559058	0.000346145	0.0266062	-0.104
ENSG00000131374.10	TBC1D5	chr3	-	17588507	17588568	17549965	17550097	17664139	17664257	0.000346403	0.0266074	-0.06
ENSG00000100226.11	GTPBP1	chr22	+	39130154	39130237	39125466	39125667	39130328	39130402	0.000346735	0.0266142	0.351
ENSG00000257815.1	RP11-611E13.2	chr12	-	70636845	70636984	70636576	70636673	70637091	70637129	0.000347642	0.0266652	0.323
ENSG00000132694.14	ARHGEF11	chr1	-	156949020	156949078	156947995	156948174	156954130	156954229	0.000350053	0.0268125	-0.146
ENSG00000008710.13	PKD1	chr16	-	2142954	2143094	2142480	2142593	2143544	2143739	0.000351297	0.0268701	-0.091
ENSG00000186815.8	TPCN1	chr12	+	113663048	113663141	113659264	113659431	113664532	113664769	0.00035277	0.026964	-0.18
ENSG00000167747.9	C19orf48	chr19	-	51305710	51305871	51305473	51305514	51306809	51307132	0.000353187	0.026977	0.063
ENSG00000122126.11	OCRL	chrX	+	128683624	128683894	128682539	128682578	128691301	128691412	0.000353766	0.0270024	0.053
ENSG00000123106.6	CCDC91	chr12	+	28378727	28378794	28343378	28343574	28410134	28410178	0.000354513	0.0270217	0.216
ENSG00000188610.8	FAM72B	chr1	+	120839969	120839985	120839411	120839865	120841974	120842052	0.000358857	0.0273148	-0.094
ENSG00000197555.5	SIPA1L1	chr14	+	71867510	71867635	71787838	71787898	71880664	71880731	0.000360892	0.0274316	0.119
ENSG00000125970.7	RALY	chr20	+	32661624	32661672	32659871	32660136	32664507	32664621	0.000362214	0.027513	-0.136
ENSG00000141034.5	GID4	chr17	+	17960016	17960073	17957461	17957548	17962181	17962283	0.000362505	0.027516	0.055
ENSG00000128928.4	IVD	chr15	+	40716333	40716415	40708488	40708561	40727615	40728146	0.000363683	0.0275481	-0.107
ENSG00000185760.11	KCNQ5	chr6	+	73814979	73815090	73787044	73787220	73821030	73821126	0.000363471	0.0275481	0.106
ENSG00000048707.9	VPS13D	chr1	+	12371869	12371982	12368487	12368698	12374171	12374384	0.0003643	0.0275757	0.056
ENSG00000167601.7	AXL	chr19	+	41745598	41745625	41745068	41745219	41748787	41748920	0.000364758	0.0275913	0.334
ENSG00000166435.11	XRRA1	chr11	-	74562132	74562248	74559159	74559507	74617283	74617501	0.000365406	0.0276212	-0.279
ENSG00000064652.6	SNX24	chr5	+	122337634	122337775	122337099	122337132	122343376	122344305	0.00036659	0.0276535	-0.165
ENSG00000133657.10	ATP13A3	chr3	-	194132927	194133017	194123405	194126845	194134487	194134568	0.0003664	0.0276535	-0.06
ENSG00000136425.8	CIB2	chr15	-	78412909	78413003	78403506	78403618	78416046	78416081	0.000367394	0.027695	0.086
ENSG00000143224.13	PPOX	chr1	+	161138782	161138973	161136889	161137024	161140409	161140559	0.000368214	0.0277377	-0.089
ENSG00000137171.10	KLC4	chr6	+	43028255	43028343	43027620	43027920	43029048	43029331	0.00036904	0.0277748	-0.255
ENSG00000104093.9	DMXL2	chr15	-	51757762	51757848	51755272	51755693	51758380	51758508	0.000369972	0.0278127	-0.051
ENSG00000108433.11	GOSR2	chr17	+	45008464	45008573	45006885	45006950	45012394	45012535	0.000372108	0.0279541	0.06
ENSG00000096433.6	ITPR3	chr6	+	33626797	33626896	33626446	33626605	33627242	33627326	0.000373501	0.0280395	-0.071
ENSG00000139546.6	TARBP2	chr12	+	53895803	53895968	53895149	53895245	53897496	53897592	0.000374128	0.0280673	-0.061
ENSG00000050767.11	COL23A1	chr5	-	177673254	177673308	177672942	177672969	177674526	177674553	0.000374909	0.0281066	0.255
ENSG00000172775.12	FAM192A	chr16	-	57212621	57212764	57209450	57209612	57219732	57219951	0.000378733	0.0283351	-0.194
ENSG00000163138.14	PACRGL	chr4	+	20703763	20703844	20702081	20702329	20706088	20706147	0.00038022	0.0284269	-0.137
ENSG00000140750.12	ARHGAP17	chr16	-	24950684	24950918	24946790	24946960	24953307	24953464	0.000385626	0.0287525	0.051
ENSG00000074964.12	ARHGEF10L	chr1	+	17975048	17975170	17966696	17966797	17981130	17981160	0.000385391	0.0287525	0.062
ENSG00000116001.11	TIA1	chr2	-	70456190	70456223	70454866	70454954	70456395	70456450	0.00038715	0.0288042	-0.069
ENSG00000165891.11	E2F7	chr12	-	77419337	77419762	77415026	77417965	77421662	77421918	0.000387016	0.0288042	0.076
ENSG00000054392.8	HHAT	chr1	+	210573811	210574006	210560811	210560925	210577807	210578023	0.000392501	0.0290229	-0.167
ENSG00000188933.10	USP32P1	chr17	+	16691248	16691449	16690017	16690436	16695140	16695367	0.000392658	0.0290229	0.053
ENSG00000174799.6	CEP135	chr4	+	56840911	56841135	56837435	56837574	56846308	56846461	0.0003927	0.0290229	0.059
ENSG00000198837.5	DENND4B	chr1	-	153915031	153915101	153914404	153914589	153915353	153915606	0.00039723	0.0293132	-0.079
ENSG00000184083.7	FAM120C	chrX	-	54114187	54114397	54112147	54112349	54117744	54117859	0.000397963	0.0293132	-0.076
ENSG00000004866.14	ST7	chr7	+	116859137	116859230	116849840	116849991	116869815	116870157	0.000397967	0.0293132	0.071
ENSG00000244187.3	TMEM141	chr9	+	139686077	139686229	139685819	139685876	139686398	139686482	0.00039796	0.0293132	0.1
ENSG00000072042.8	RDH11	chr14	-	68159154	68159310	68156928	68157138	68162346	68162491	0.00039895	0.0293659	0.231
ENSG00000147099.15	HDAC8	chrX	-	71710778	71710856	71708782	71708891	71787738	71787880	0.000399505	0.0293672	-0.072
ENSG00000164733.16	CTSB	chr8	-	11721884	11721972	11710837	11710988	11724762	11724900	0.000401199	0.0294506	0.077
ENSG00000015285.6	WAS	chrX	+	48541656	48541752	48534984	48535137	48542208	48542374	0.000402887	0.0295365	0.191
ENSG00000196182.6	STK40	chr1	-	36833448	36833685	36828159	36828257	36851323	36851485	0.000403354	0.0295429	-0.098
ENSG00000177225.12	PDDC1	chr11	-	773427	773629	772426	772521	777398	777483	0.000403514	0.0295429	0.111
ENSG00000183486.8	MX2	chr21	+	42762491	42762630	42754336	42754491	42767513	42767712	0.000406603	0.0296698	0.066
ENSG00000000419.8	DPM1	chr20	-	49557665	49557746	49557401	49557470	49562273	49562299	0.000407421	0.0296983	-0.373
ENSG00000138078.11	PREPL	chr2	-	44586635	44586889	44573406	44573529	44588555	44588700	0.000408128	0.0297019	0.069
ENSG00000152380.5	FAM151B	chr5	+	79790871	79791102	79783804	79783967	79809422	79809480	0.000410946	0.0298079	-0.262
ENSG00000214765.4	SEPT7P2	chr7	-	45786425	45786547	45784595	45784647	45786813	45786910	0.000411859	0.0298148	-0.054
ENSG00000259768.3	RP5-991G20.1	chr16	+	72781019	72781081	72779303	72779365	72815626	72815718	0.000412361	0.0298315	0.161
ENSG00000241549.4	GUSBP2	chr6	-	26918864	26918938	26892898	26893054	26924167	26924333	0.00041462	0.0299355	-0.102
ENSG00000196155.8	PLEKHG4	chr16	+	67322378	67322507	67322069	67322303	67322705	67322975	0.000418631	0.0301456	-0.066
ENSG00000113966.5	ARL6	chr3	+	97484834	97484933	97483364	97483821	97486924	97487074	0.000420309	0.0302267	-0.11
ENSG00000100523.10	DDHD1	chr14	-	53560033	53560162	53558502	53558650	53570400	53570574	0.000420886	0.0302309	-0.069
ENSG00000240344.4	PPIL3	chr2	-	201747064	201747105	201746143	201746211	201749984	201750090	0.000423231	0.0303371	0.15
ENSG00000177565.11	TBL1XR1	chr3	-	176849150	176849237	176797614	176797733	176878658	176878776	0.000423527	0.0303384	-0.233
ENSG00000257621.3	RP11-349A22.5	chr14	-	58755435	58755531	58752449	58752474	58758352	58758425	0.000423989	0.0303517	-0.095
ENSG00000183060.11	LYSMD4	chr15	-	100273133	100273233	100271922	100272212	100273549	100273626	0.000424774	0.030388	0.267
ENSG00000078487.13	ZCWPW1	chr7	-	100002635	100002716	100001800	100001867	100004316	100004421	0.000432071	0.0308294	0.078
ENSG00000150347.10	ARID5B	chr10	+	63759849	63760080	63699941	63700167	63810646	63810759	0.000432707	0.0308547	-0.178
ENSG00000095485.12	CWF19L1	chr10	-	101996606	101996726	101992054	101993128	102003454	102003529	0.000434072	0.0308624	-0.319
ENSG00000125970.7	RALY	chr20	+	32661368	32661441	32619327	32619410	32664507	32664621	0.000433912	0.0308624	-0.291
ENSG00000166435.11	XRRA1	chr11	-	74641344	74641417	74632258	74632392	74644845	74644917	0.00043451	0.0308626	0.112
ENSG00000122515.10	ZMIZ2	chr7	+	44799749	44799827	44798879	44799059	44800023	44800192	0.000440302	0.0311921	-0.126
ENSG00000163812.9	ZDHHC3	chr3	-	44974609	44974691	44956748	44959635	44986659	44986688	0.000440573	0.0311921	0.348
ENSG00000105982.12	RNF32	chr7	+	156436494	156436586	156433442	156433649	156437192	156437233	0.000441442	0.0312132	-0.159
ENSG00000116138.8	DNAJC16	chr1	+	15855582	15855767	15853307	15853453	15860731	15860798	0.000441267	0.0312132	0.071
ENSG00000189339.7	SLC35E2B	chr1	-	1622414	1622832	1607816	1608285	1623887	1624083	0.00044212	0.0312315	0.108
ENSG00000181038.9	METTL23	chr17	+	74725771	74725876	74722921	74723295	74729374	74729459	0.000445204	0.0313594	-0.162
ENSG00000206149.6	HERC2P9	chr15	+	28863364	28863524	28857287	28857319	28863669	28863801	0.000445228	0.0313594	0.138
ENSG00000143630.5	HCN3	chr1	+	155253764	155253926	155252201	155252631	155254329	155254548	0.00044572	0.0313715	-0.172
ENSG00000061938.12	TNK2	chr3	-	195596367	195596412	195594231	195595580	195596984	195597039	0.000447596	0.0314508	-0.064
ENSG00000137210.9	TMEM14B	chr6	+	10751365	10751467	10749434	10749501	10756699	10756848	0.00044829	0.0314738	0.138
ENSG00000196313.7	POM121	chr7	+	72409874	72409948	72400477	72400649	72410952	72411055	0.000449406	0.0314915	0.151
ENSG00000250903.4	GMDS-AS1	chr6	+	2269931	2270033	2263834	2263918	2283732	2284008	0.00045065	0.0315585	0.137
ENSG00000224914.2	LINC00863	chr10	+	89114376	89114654	89104193	89104252	89114847	89115182	0.000453134	0.0317121	0.137
ENSG00000166501.8	PRKCB	chr16	+	24043456	24043568	23848695	23848727	24104111	24104268	0.000453698	0.0317313	0.213
ENSG00000139178.6	C1RL	chr12	-	7252496	7252622	7252281	7252356	7254493	7254683	0.000454434	0.0317422	-0.064
ENSG00000165490.8	C11orf82	chr11	+	82624324	82624428	82612783	82612864	82625764	82625893	0.000454967	0.0317592	-0.093
ENSG00000142512.10	SIGLEC10	chr19	-	51919151	51919421	51918821	51918869	51919563	51919611	0.000455276	0.0317605	-0.145
ENSG00000263072.1	RP11-473M20.14	chr16	-	3182850	3183195	3179461	3179654	3184630	3184857	0.000455616	0.031764	-0.133
ENSG00000198089.10	SFI1	chr22	+	32000854	32000931	31998197	31998279	32002313	32002416	0.000456767	0.0317835	0.137
ENSG00000231889.3	TRAF3IP2-AS1	chr6	+	111895823	111896005	111886453	111886485	111897564	111897673	0.000456351	0.0317835	0.141
ENSG00000225077.2	LINC00337	chr1	+	6297025	6297210	6296299	6296396	6297304	6297405	0.000457796	0.0318138	0.273
ENSG00000074416.9	MGLL	chr3	-	127429418	127429508	127413817	127414033	127439895	127440006	0.000459216	0.0318526	-0.052
ENSG00000132780.12	NASP	chr1	+	46060365	46060445	46056894	46056942	46066056	46066129	0.000459996	0.0318729	-0.065
ENSG00000197548.8	ATG7	chr3	+	11322679	11322788	11314128	11314395	11340159	11340329	0.000460091	0.0318729	0.103
ENSG00000179630.6	LACC1	chr13	+	44464249	44464410	44462892	44463118	44465584	44468067	0.000465092	0.0321786	-0.109
ENSG00000143224.13	PPOX	chr1	+	161137160	161137276	161136889	161137024	161140409	161140559	0.000465597	0.0321933	-0.073
ENSG00000237298.4	TTN-AS1	chr2	+	179436026	179436176	179387950	179388363	179448439	179448648	0.000475592	0.0327808	-0.133
ENSG00000160993.3	ALKBH4	chr7	-	102100050	102100157	102097280	102098428	102105160	102105310	0.000478005	0.0329264	0.058
ENSG00000068097.10	HEATR6	chr17	-	58151106	58151520	58150524	58150640	58153490	58153546	0.000478515	0.0329408	-0.125
ENSG00000169972.7	PUSL1	chr1	+	1244294	1244352	1243946	1244100	1244465	1244653	0.000478941	0.0329494	-0.07
ENSG00000135127.7	CCDC64	chr12	+	120499497	120499630	120436324	120436540	120509425	120509605	0.000480187	0.0330144	0.24
ENSG00000126581.8	BECN1	chr17	-	40967688	40967790	40962877	40962946	40967925	40968013	0.000483322	0.0331882	-0.135
ENSG00000106070.13	GRB10	chr7	-	50772836	50773020	50771517	50771605	50778571	50778687	0.000484337	0.0332371	-0.267
ENSG00000174776.6	WDR49	chr3	-	167284617	167284682	167277851	167278016	167293705	167293939	0.000485152	0.0332721	-0.115
ENSG00000109756.4	RAPGEF2	chr4	+	160164925	160164943	160162352	160162520	160225493	160225625	0.000488396	0.0334114	-0.126
ENSG00000111206.8	FOXM1	chr12	-	2974520	2974565	2973848	2973918	2977728	2977747	0.000488404	0.0334114	0.132
ENSG00000231721.2	MKLN1-AS1	chr7	-	130652147	130652276	130630368	130630594	130668811	130668868	0.000491016	0.0335439	-0.314
ENSG00000182473.16	EXOC7	chr17	-	74086409	74086478	74085255	74085401	74087223	74087316	0.000491985	0.0335515	0.079
ENSG00000197548.8	ATG7	chr3	+	11330334	11330426	11322679	11322788	11340159	11340329	0.000492655	0.0335763	0.089
ENSG00000131368.3	MRPS25	chr3	-	15094886	15094974	15090718	15091442	15106567	15106767	0.000493737	0.0336291	-0.319
ENSG00000230189.2	GS1-124K5.2	chr7	-	65941245	65941314	65915057	65915223	65943995	65944083	0.000494168	0.0336375	0.273
ENSG00000175662.13	TOM1L2	chr17	-	17787947	17788082	17782940	17783057	17801909	17801988	0.00049828	0.0338084	-0.199
ENSG00000187446.7	CHP1	chr15	+	41549107	41549188	41523337	41523647	41562754	41562816	0.000498531	0.0338084	0.203
ENSG00000161800.8	RACGAP1	chr12	-	50412298	50412372	50410413	50410498	50425479	50425650	0.00049767	0.0338084	0.21
ENSG00000134452.15	FBXO18	chr10	+	5932981	5933079	5932242	5932309	5937018	5937150	0.000498937	0.033815	0.498
ENSG00000196476.7	C20orf96	chr20	-	256608	256727	251503	251908	257684	257786	0.000499931	0.0338613	0.062
ENSG00000196387.5	ZNF140	chr12	+	133657858	133657915	133657059	133657137	133659688	133659815	0.000500501	0.033879	-0.067
ENSG00000149294.12	NCAM1	chr11	+	113092017	113092047	113085090	113085233	113102366	113102517	0.000503053	0.0339303	-0.233
ENSG00000159063.8	ALG8	chr11	-	77820487	77820627	77815401	77815499	77835066	77835260	0.000502709	0.0339303	-0.081
ENSG00000055147.13	FAM114A2	chr5	-	153417852	153417994	153414303	153414527	153418386	153418470	0.000502231	0.0339303	-0.067
ENSG00000197329.7	PELI1	chr2	-	64370451	64370660	64335485	64335513	64371214	64371530	0.0005024	0.0339303	-0.064
ENSG00000141376.16	BCAS3	chr17	+	59465978	59466069	59457866	59457932	59469337	59469634	0.000506896	0.034164	0.094
ENSG00000064313.7	TAF2	chr8	-	120816117	120816259	120809901	120810086	120831585	120831746	0.000507275	0.0341685	-0.075
ENSG00000226435.6	ANKRD18DP	chr3	-	197792623	197792677	197790588	197790659	197799626	197799701	0.000509282	0.0342826	-0.115
ENSG00000251669.1	FAM86EP	chr4	-	3948495	3948644	3945000	3945099	3949816	3949947	0.000512732	0.0343669	0.091
ENSG00000185760.11	KCNQ5	chr6	+	73787484	73787610	73787044	73787220	73821030	73821126	0.000514383	0.0344564	0.103
ENSG00000177302.10	TOP3A	chr17	-	18211626	18211738	18209901	18210280	18212195	18212255	0.000515401	0.0345035	-0.094
ENSG00000163803.8	PLB1	chr2	+	28828719	28828815	28826832	28826914	28829362	28829434	0.000517272	0.0346076	0.051
ENSG00000177565.11	TBL1XR1	chr3	-	176797614	176797733	176782707	176782810	176804752	176804829	0.000518439	0.0346169	0.131
ENSG00000136444.5	RSAD1	chr17	+	48560700	48560848	48559451	48559817	48561802	48562003	0.000517898	0.0346169	0.243
ENSG00000183621.11	ZNF438	chr10	-	31212215	31212344	31197861	31197944	31273297	31273355	0.000518282	0.0346169	0.245
ENSG00000186812.8	ZNF397	chr18	+	32825225	32825315	32823115	32823257	32834195	32834366	0.000519714	0.034665	0.095
ENSG00000214013.5	GANC	chr15	+	42573114	42573331	42568545	42568608	42579888	42580016	0.000521567	0.0347298	0.096
ENSG00000149925.12	ALDOA	chr16	+	30066492	30066648	30066104	30066248	30075049	30075569	0.000524767	0.0348534	-0.083
ENSG00000229855.4	CTC-546K23.1	chr5	+	120656574	120656681	120649655	120649899	120683387	120683561	0.000535518	0.035417	0.416
ENSG00000204536.9	CCHCR1	chr6	-	31112405	31112565	31111038	31111190	31112661	31112892	0.000536333	0.0354199	-0.111
ENSG00000112759.12	SLC29A1	chr6	+	44193797	44193904	44191301	44191378	44194999	44195079	0.00053832	0.0354748	0.077
ENSG00000006837.7	CDKL3	chr5	-	133644264	133644418	133643691	133644157	133657481	133657594	0.000542164	0.0356046	0.126
ENSG00000087157.14	PGS1	chr17	+	76378744	76378866	76374729	76374889	76392388	76392466	0.000542257	0.0356046	0.177
ENSG00000102078.11	SLC25A14	chrX	+	129474080	129474327	129473886	129473950	129479155	129479249	0.00054357	0.0356128	0.076
ENSG00000142188.12	TMEM50B	chr21	-	34809189	34809299	34804791	34805109	34811520	34811604	0.000543669	0.0356128	0.11
ENSG00000028203.13	VEZT	chr12	+	95635939	95636090	95617955	95618012	95645715	95646216	0.000543684	0.0356128	0.111
ENSG00000163681.10	SLMAP	chr3	+	57850533	57850584	57850274	57850443	57875767	57875827	0.000545234	0.0356716	-0.126
ENSG00000106080.6	FKBP14	chr7	-	30059828	30059920	30058611	30058739	30062280	30062432	0.000547584	0.0357825	-0.125
ENSG00000159147.13	DONSON	chr21	-	34954470	34954552	34954256	34954361	34956895	34957074	0.000553499	0.0361259	-0.148
ENSG00000188917.10	TRMT2B	chrX	-	100306239	100306722	100297030	100297301	100306805	100307072	0.00055552	0.0361931	-0.106
ENSG00000174915.7	PTDSS2	chr11	+	473894	473977	458673	460288	479084	479090	0.000556132	0.0361939	0.055
ENSG00000160767.16	FAM189B	chr1	-	155220885	155220955	155218195	155218264	155223415	155223523	0.000556194	0.0361939	0.337
ENSG00000174501.10	ANKRD36C	chr2	-	96563017	96563090	96561309	96561338	96563184	96563213	0.000558509	0.036323	0.098
ENSG00000122557.5	HERPUD2	chr7	-	35709824	35709938	35707043	35707198	35733793	35734176	0.000558855	0.0363239	-0.059
ENSG00000147677.6	EIF3H	chr8	-	117746515	117746563	117671051	117671219	117767904	117768061	0.00056399	0.0365925	0.156
ENSG00000120029.8	C10orf76	chr10	-	103716353	103716480	103699619	103699695	103734968	103735057	0.000567426	0.0367393	-0.061
ENSG00000139350.7	NEDD1	chr12	+	97301381	97301634	97301000	97301078	97303529	97303673	0.000567373	0.0367393	0.122
ENSG00000150076.18	C10orf68	chr10	+	32863356	32863454	32860786	32860821	32871996	32872214	0.000569431	0.0368363	0.339
ENSG00000106123.7	EPHB6	chr7	+	142568343	142568438	142567966	142568160	142568548	142568845	0.000570022	0.0368528	0.062
ENSG00000132478.5	UNK	chr17	+	73805028	73805120	73787851	73788100	73805840	73806050	0.000575194	0.0371433	-0.191
ENSG00000161328.10	LRRC56	chr11	+	538597	538860	537526	537605	539579	539726	0.000575984	0.0371505	0.142
ENSG00000134470.15	IL15RA	chr10	-	6005705	6005804	6002329	6002530	6008107	6008302	0.000577912	0.0372528	0.256
ENSG00000154914.12	USP43	chr17	+	9586139	9586275	9583547	9583683	9590114	9590180	0.000579821	0.037332	0.077
ENSG00000170525.14	PFKFB3	chr10	+	6268154	6268328	6266111	6266176	6274857	6274922	0.00058102	0.0373652	-0.076
ENSG00000245281.2	CTD-2547L16.1	chr8	+	17942750	17942994	17942376	17942448	17944391	17944445	0.000582355	0.0373721	-0.228
ENSG00000175274.14	TP53I11	chr11	-	44960664	44960741	44959757	44959917	44962553	44962628	0.000581723	0.0373721	0.271
ENSG00000172345.9	STARD5	chr15	-	81615239	81615289	81614748	81614881	81616142	81616482	0.000582494	0.0373721	0.275
ENSG00000162004.12	CCDC78	chr16	-	775412	775580	772581	775293	775793	775880	0.000585995	0.0374312	0.073
ENSG00000089818.12	NECAP1	chr12	+	8244364	8244446	8242531	8242895	8245271	8245367	0.00058615	0.0374312	0.076
ENSG00000189050.10	RNFT1	chr17	-	58039900	58039977	58035651	58035805	58040187	58040327	0.000584312	0.0374312	0.149
ENSG00000141971.8	MVB12A	chr19	+	17524029	17524114	17516953	17517105	17534306	17534426	0.00058567	0.0374312	0.473
ENSG00000106603.13	COA1	chr7	-	43696814	43696868	43695631	43695752	43705256	43705321	0.000587275	0.0374812	0.13
ENSG00000123124.9	WWP1	chr8	+	87381167	87381260	87354966	87355159	87386258	87386349	0.000588519	0.0375387	-0.064
ENSG00000230590.3	FTX	chrX	-	73504577	73504783	73501536	73501683	73511592	73511910	0.00058992	0.0375842	-0.193
ENSG00000163964.9	PIGX	chr3	+	196455572	196455626	196454793	196455007	196460629	196460773	0.000592182	0.0376845	0.454
ENSG00000138614.10	VWA9	chr15	-	65899639	65899780	65897466	65897574	65903435	65903596	0.000593841	0.0377681	-0.098
ENSG00000198089.10	SFI1	chr22	+	31998197	31998279	31985432	31985563	32000294	32000390	0.000595081	0.037803	0.103
ENSG00000166839.12	ANKDD1A	chr15	+	65218264	65218369	65214119	65214218	65223019	65223118	0.000596097	0.0378456	-0.311
ENSG00000111237.14	VPS29	chr12	-	110934627	110934807	110933850	110934008	110937261	110937351	0.000597634	0.0378992	-0.223
ENSG00000171045.10	TSNARE1	chr8	-	143396363	143396450	143381846	143382008	143399904	143399995	0.000599754	0.0380116	-0.235
ENSG00000153827.9	TRIP12	chr2	-	230725121	230725247	230723487	230724290	230744697	230744844	0.00060019	0.0380172	-0.065
ENSG00000242086.4	LINC00969	chr3	+	195416209	195416309	195415254	195415668	195423231	195423296	0.000603081	0.0381462	-0.071
ENSG00000133816.9	MICAL2	chr11	+	12270730	12270793	12260982	12261132	12277189	12277297	0.000603774	0.038156	-0.09
ENSG00000087053.14	MTMR2	chr11	-	95615537	95615660	95599566	95599650	95621319	95621425	0.000604348	0.0381702	-0.154
ENSG00000136536.10	MARCH7	chr2	+	160571067	160571109	160568999	160569117	160599571	160599764	0.000610186	0.0384723	0.316
ENSG00000144559.6	TAMM41	chr3	-	11849306	11849369	11831915	11832055	11850990	11851156	0.000611388	0.0384816	-0.051
ENSG00000123179.9	EBPL	chr13	-	50243912	50243982	50234858	50235344	50265389	50265599	0.000612051	0.0385011	0.077
ENSG00000136044.7	APPL2	chr12	-	105600838	105600985	105597200	105597563	105601748	105601767	0.000616189	0.0387392	0.06
ENSG00000187994.9	RINL	chr19	-	39366970	39367421	39364525	39364628	39368871	39368913	0.000617485	0.0387984	-0.071
ENSG00000131650.9	KREMEN2	chr16	+	3017526	3017605	3017320	3017446	3017810	3018380	0.000619905	0.0388636	-0.157
ENSG00000188917.10	TRMT2B	chrX	-	100306239	100306355	100296305	100296360	100306632	100306722	0.000620108	0.0388636	0.111
ENSG00000171811.8	TTC40	chr10	-	134730052	134730186	134726549	134726762	134733562	134733686	0.000622125	0.0389112	-0.129
ENSG00000185658.9	BRWD1	chr21	-	40684997	40685027	40684488	40684826	40685368	40685496	0.000623307	0.0389503	-0.121
ENSG00000173041.7	ZNF680	chr7	-	64021323	64021651	64004723	64004810	64023302	64023453	0.000623461	0.0389503	-0.084
ENSG00000138867.12	GUCD1	chr22	-	24950916	24951104	24943875	24944041	24951582	24951827	0.000625092	0.0390299	-0.099
ENSG00000254521.2	SIGLEC12	chr19	-	52003173	52003234	52002691	52002970	52004560	52005026	0.000627106	0.0390888	0.059
ENSG00000163013.7	FBXO41	chr2	-	73499314	73499430	73495853	73496896	73500142	73500257	0.000628391	0.0391466	0.056
ENSG00000108021.15	FAM208B	chr10	+	5756097	5756170	5726910	5727138	5762506	5762631	0.000633146	0.0393532	-0.143
ENSG00000168958.15	MFF	chr2	+	228207460	228207535	228205007	228205096	228211941	228211990	0.000632823	0.0393532	-0.092
ENSG00000115020.12	PIKFYVE	chr2	+	209141435	209141554	209136234	209136415	209153452	209153542	0.000632619	0.0393532	0.3
ENSG00000167995.11	BEST1	chr11	+	61725617	61725770	61724858	61724936	61729726	61730365	0.000637814	0.0395984	-0.344
ENSG00000197535.10	MYO5A	chr15	-	52641014	52641023	52638557	52638658	52643450	52643678	0.000638603	0.0396249	-0.125
ENSG00000178226.6	PRSS36	chr16	-	31151999	31152078	31150302	31150737	31152789	31152931	0.00064027	0.0397058	0.276
ENSG00000165912.11	PACSIN3	chr11	-	47205870	47206048	47204554	47204620	47207899	47207964	0.000641827	0.0397798	0.069
ENSG00000127452.4	FBXL12	chr19	-	9924813	9925018	9923906	9923950	9925247	9925345	0.000642685	0.039788	-0.078
ENSG00000151276.19	MAGI1	chr3	-	65433696	65433732	65428466	65428524	65438932	65439015	0.000642506	0.039788	0.231
ENSG00000259024.2	TVP23C-CDRT4	chr17	-	15406411	15406546	15343524	15343599	15443746	15443875	0.000648144	0.0400579	0.348
ENSG00000115234.6	SNX17	chr2	+	27595489	27595607	27593502	27593673	27595906	27595980	0.00065241	0.0402988	-0.073
ENSG00000131018.18	SYNE1	chr6	-	152451854	152451913	152442818	152443811	152453256	152453349	0.000653639	0.0403065	-0.169
ENSG00000136828.14	RALGPS1	chr9	+	129958752	129958910	129957369	129957496	129972973	129973057	0.000653284	0.0403065	0.309
ENSG00000137200.8	CMTR1	chr6	+	37429745	37429878	37429324	37429421	37430604	37430784	0.00065433	0.0403264	-0.055
ENSG00000135541.16	AHI1	chr6	-	135618569	135618630	135606432	135606785	135621637	135621670	0.000655479	0.0403695	-0.353
ENSG00000122417.11	ODF2L	chr1	-	86834318	86834405	86826108	86826219	86836700	86836836	0.000655767	0.0403695	0.076
ENSG00000064607.12	SUGP2	chr19	-	19109732	19109794	19105952	19106089	19114976	19115455	0.000656531	0.0403938	-0.295
ENSG00000166762.12	CATSPER2	chr15	-	43940114	43940261	43939491	43939665	43960225	43960316	0.000656996	0.0403997	-0.071
ENSG00000123415.10	SMUG1	chr12	-	54581602	54581686	54577437	54577743	54582298	54582741	0.000658327	0.0404361	0.173
ENSG00000204130.8	RUFY2	chr10	-	70105587	70105668	70100886	70101045	70105763	70105841	0.000659182	0.0404659	-0.087
ENSG00000167566.12	NCKAP5L	chr12	-	50196879	50196948	50195630	50195750	50199762	50199824	0.000663944	0.0406929	0.386
ENSG00000086300.11	SNX10	chr7	+	26396626	26396747	26386039	26386086	26400594	26400651	0.000667485	0.040861	-0.13
ENSG00000101181.13	MTG2	chr20	+	60768471	60768680	60758097	60758113	60770857	60771005	0.000669655	0.0409392	-0.058
ENSG00000145781.4	COMMD10	chr5	+	115639226	115639380	115633943	115634089	115735178	115735319	0.000670663	0.0409634	-0.073
ENSG00000163975.7	MFI2	chr3	-	196751173	196751356	196749827	196749984	196753530	196753630	0.000672147	0.040986	0.077
ENSG00000139531.8	SUOX	chr12	+	56395669	56395732	56391102	56391123	56395995	56396055	0.000671921	0.040986	0.141
ENSG00000213614.5	HEXA	chr15	-	72640388	72640475	72638317	72638666	72647899	72647965	0.000674373	0.0410989	0.302
ENSG00000026508.12	CD44	chr11	+	35231511	35231601	35211381	35211612	35232792	35232857	0.000675125	0.0411218	0.166
ENSG00000170264.8	FAM161A	chr2	-	62073893	62074131	62069256	62069495	62080993	62081199	0.000675756	0.0411373	0.127
ENSG00000058056.4	USP13	chr3	+	179408028	179408089	179399665	179399791	179424721	179424864	0.000676772	0.0411763	0.092
ENSG00000134490.9	TMEM241	chr18	-	21010594	21010641	21001330	21001408	21017744	21017817	0.000677785	0.0411921	0.111
ENSG00000196182.6	STK40	chr1	-	36833452	36833685	36828159	36828257	36851323	36851480	0.000684658	0.0415176	-0.086
ENSG00000126456.11	IRF3	chr19	-	50167843	50167930	50166677	50166771	50168715	50169100	0.000688024	0.0415371	-0.198
ENSG00000126804.9	ZBTB1	chr14	+	64983317	64983469	64977966	64978102	64988204	64988324	0.000685498	0.0415371	-0.154
ENSG00000100151.11	PICK1	chr22	+	38463710	38463777	38461008	38461137	38465039	38465092	0.000688395	0.0415371	-0.101
ENSG00000243927.1	MRPS6	chr21	+	35475133	35475207	35445523	35445568	35497640	35497780	0.000688218	0.0415371	-0.066
ENSG00000157017.11	GHRL	chr3	-	10328711	10329010	10328387	10328496	10331445	10331491	0.000691397	0.0416632	0.175
ENSG00000138078.11	PREPL	chr2	-	44586635	44587177	44573406	44573529	44588555	44588700	0.000692555	0.0416961	0.073
ENSG00000135241.12	PNPLA8	chr7	-	108158633	108158745	108154879	108155891	108161919	108161965	0.000694624	0.0417977	0.183
ENSG00000267179.1	ZNF763	chr19	+	12067319	12067457	12035925	12036088	12072475	12072573	0.000695057	0.0418008	-0.222
ENSG00000159063.8	ALG8	chr11	-	77825311	77825438	77815401	77815499	77835066	77835260	0.000695609	0.041811	-0.217
ENSG00000054523.12	KIF1B	chr1	+	10386168	10386417	10384815	10384953	10394577	10394696	0.000703073	0.0420978	0.087
ENSG00000007341.14	ST7L	chr1	-	113084572	113084712	113066139	113068733	113093222	113093315	0.000704698	0.042149	0.108
ENSG00000197162.8	ZNF785	chr16	-	30591115	30591168	30585060	30585212	30593831	30594125	0.000704503	0.042149	0.151
ENSG00000270011.2	ZNF177	chr19	+	9475537	9475624	9435370	9435456	9486991	9487099	0.000706551	0.0422137	0.259
ENSG00000177628.11	GBA	chr1	-	155209676	155209868	155208307	155208441	155214296	155214490	0.000710188	0.0423362	0.051
ENSG00000074370.13	ATP2A3	chr17	-	3831274	3831332	3828584	3828735	3831533	3831621	0.000710536	0.0423362	0.11
ENSG00000117155.12	SSX2IP	chr1	-	85146020	85146070	85136871	85136991	85156053	85156240	0.000711711	0.0423832	0.164
ENSG00000158062.16	UBXN11	chr1	-	26627416	26627515	26624452	26624553	26628184	26628213	0.000712643	0.0423926	0.14
ENSG00000010318.15	PHF7	chr3	+	52456775	52456897	52456237	52456354	52457106	52457656	0.000714388	0.0424733	-0.079
ENSG00000164037.12	SLC9B1	chr4	-	103866349	103866477	103853280	103853456	103912799	103912869	0.000722111	0.0428394	-0.192
ENSG00000234062.3	RP11-308D16.4	chrX	+	136007405	136007538	135991633	135991939	136075644	136075814	0.000722734	0.0428531	-0.099
ENSG00000069943.5	PIGB	chr15	+	55626064	55626205	55611157	55611611	55646995	55647176	0.00073304	0.0433	-0.116
ENSG00000151687.10	ANKAR	chr2	+	190569748	190569950	190554252	190554690	190571663	190571872	0.000733797	0.0433213	-0.109
ENSG00000205581.6	HMGN1	chr21	-	40717755	40719218	40717071	40717200	40719304	40719409	0.000735977	0.0434032	-0.072
ENSG00000173418.7	NAA20	chr20	+	20006312	20006411	19998002	19998093	20013151	20013297	0.000738329	0.0434061	-0.279
ENSG00000105520.6	DKFZP761J1410	chr19	+	11468294	11468415	11467477	11467652	11470282	11470396	0.00073834	0.0434061	0.053
ENSG00000250565.2	ATP6V1E2	chr2	-	46764514	46764715	46763749	46763842	46768528	46768728	0.000738405	0.0434061	0.061
ENSG00000153914.11	SREK1	chr5	+	65451892	65454760	65449290	65449424	65455046	65455162	0.000739817	0.0434658	-0.067
ENSG00000197943.5	PLCG2	chr16	+	81885654	81885731	81832070	81832587	81888048	81888192	0.000740259	0.0434684	0.091
ENSG00000108599.10	AKAP10	chr17	-	19844199	19844323	19843025	19843162	19845138	19845223	0.000741585	0.0435229	0.096
ENSG00000172965.10	MIR4435-1HG	chr2	-	112005724	112005818	111997400	111997573	112101637	112101814	0.000750672	0.0439619	-0.091
ENSG00000015153.10	YAF2	chr12	-	42629415	42629557	42604349	42604421	42631400	42631526	0.000754397	0.0440152	-0.111
ENSG00000257621.3	RP11-349A22.5	chr14	-	58755435	58755531	58740696	58740728	58758352	58758425	0.000753291	0.0440152	-0.092
ENSG00000177189.8	RPS6KA3	chrX	-	20258686	20258787	20252875	20252932	20259710	20259806	0.00075371	0.0440152	-0.087
ENSG00000133466.9	C1QTNF6	chr22	-	37587711	37587777	37586904	37586968	37593642	37593788	0.000762951	0.0443836	-0.185
ENSG00000244754.4	N4BP2L2	chr13	-	33111142	33111164	33101594	33101669	33112914	33112936	0.000763145	0.0443836	-0.13
ENSG00000158079.10	PTPDC1	chr9	+	96863847	96864033	96859602	96860861	96866556	96866667	0.000765668	0.0445068	-0.109
ENSG00000070614.10	NDST1	chr5	+	149898359	149898481	149865893	149865970	149900429	149900664	0.000767543	0.0445212	-0.454
ENSG00000166762.12	CATSPER2	chr15	-	43941924	43942077	43939617	43939665	43960225	43960316	0.00076704	0.0445212	-0.208
ENSG00000143321.14	HDGF	chr1	-	156728774	156729011	156725328	156725456	156736581	156736717	0.000766695	0.0445212	0.193
ENSG00000152455.11	SUV39H2	chr10	+	14923498	14923644	14920861	14920918	14938844	14938976	0.000772503	0.0447614	0.086
ENSG00000160310.12	PRMT2	chr21	+	48080744	48080874	48069486	48069651	48081711	48081848	0.000774138	0.0448069	-0.082
ENSG00000175054.10	ATR	chr3	-	142215975	142216034	142215238	142215362	142217438	142217616	0.000774981	0.0448101	-0.058
ENSG00000084693.11	AGBL5	chr2	+	27292440	27292574	27291915	27291962	27292959	27293488	0.000776029	0.044847	-0.102
ENSG00000122008.11	POLK	chr5	+	74889702	74889874	74886168	74886265	74892046	74893003	0.000777019	0.0448805	0.066
ENSG00000139567.8	ACVRL1	chr12	+	52307342	52307554	52306882	52307134	52308222	52308369	0.000777639	0.0448926	-0.176
ENSG00000125826.15	RBCK1	chr20	+	401514	401650	400201	400375	402770	402882	0.000780148	0.0449664	-0.067
ENSG00000112759.12	SLC29A1	chr6	+	44193797	44193904	44187392	44187519	44194999	44195079	0.000780656	0.044972	0.173
ENSG00000183486.8	MX2	chr21	+	42735195	42735316	42733933	42733982	42748762	42749082	0.000785061	0.0450125	-0.171
ENSG00000267858.1	AC016629.8	chr19	+	59080279	59080362	59070495	59070776	59081750	59081824	0.000784308	0.0450125	-0.069
ENSG00000144504.11	ANKMY1	chr2	-	241452218	241452359	241439868	241439982	241463301	241463426	0.000784547	0.0450125	-0.055
ENSG00000143248.8	RGS5	chr1	-	163218319	163218388	163138047	163138158	163276022	163276119	0.000783971	0.0450125	0.274
ENSG00000164733.16	CTSB	chr8	-	11719853	11719987	11718914	11718988	11725509	11725623	0.000787189	0.0450872	-0.256
ENSG00000188917.10	TRMT2B	chrX	-	100306632	100306722	100297030	100297301	100306805	100307043	0.000788254	0.0451247	-0.166
ENSG00000106070.13	GRB10	chr7	-	50778571	50778687	50742132	50742355	50823583	50823753	0.000792785	0.0453603	0.225
ENSG00000205309.9	NT5M	chr17	+	17207677	17207791	17206991	17207131	17209856	17209957	0.000795019	0.0454406	-0.208
ENSG00000031003.6	FAM13B	chr5	-	137292165	137292231	137289854	137290065	137295304	137295452	0.000798651	0.0455931	0.065
ENSG00000137842.2	TMEM62	chr15	+	43430771	43430817	43427709	43427847	43438690	43438719	0.000798936	0.0455931	0.397
ENSG00000006062.9	MAP3K14	chr17	-	43363797	43364411	43362178	43362316	43364519	43364730	0.000808998	0.0460712	-0.088
ENSG00000153094.17	BCL2L11	chr2	+	111881626	111881716	111881309	111881446	111921709	111921808	0.000811316	0.0461792	0.112
ENSG00000197555.5	SIPA1L1	chr14	+	71867510	71867635	71787838	71787898	71979459	71979562	0.000812053	0.0461971	0.124
ENSG00000135473.10	PAN2	chr12	-	56712020	56712218	56710006	56711427	56712871	56712965	0.000813785	0.0462476	0.082
ENSG00000127220.5	ABHD8	chr19	-	17412991	17413041	17412097	17412433	17414050	17414234	0.000814422	0.0462598	-0.09
ENSG00000130758.3	MAP3K10	chr19	+	40711027	40711203	40704303	40704462	40715009	40715126	0.000816959	0.0463317	-0.111
ENSG00000143493.8	INTS7	chr1	-	212125952	212126043	212119948	212120047	212139771	212139840	0.000823431	0.0466263	0.051
ENSG00000161265.10	U2AF1L4	chr19	-	36234055	36234106	36233427	36233704	36234709	36234805	0.000824182	0.0466447	0.055
ENSG00000180061.5	TMEM150B	chr19	-	55834015	55834111	55832336	55832412	55836639	55836669	0.000829881	0.0469187	-0.212
ENSG00000122507.16	BBS9	chr7	+	33390830	33390935	33388679	33388782	33392470	33392485	0.00082979	0.0469187	-0.098
ENSG00000106070.13	GRB10	chr7	-	50778571	50778687	50742132	50742355	50860920	50861129	0.000843305	0.0473915	-0.332
ENSG00000161996.13	WDR90	chr16	+	712672	713064	712219	712331	715678	715801	0.00084344	0.0473915	-0.079
ENSG00000101190.8	TCFL5	chr20	-	61485367	61485509	61472466	61473449	61491476	61491660	0.000841981	0.0473915	-0.06
ENSG00000205592.9	MUC19	chr12	+	40929566	40929611	40929005	40929059	40930724	40930778	0.000843358	0.0473915	0.129
ENSG00000148180.12	GSN	chr9	+	124062333	124062404	124060043	124060120	124064240	124064427	0.00084201	0.0473915	0.271
ENSG00000138380.13	CARF	chr2	+	203806582	203806703	203789019	203789138	203817281	203817402	0.000845679	0.0474686	0.119
ENSG00000131697.13	NPHP4	chr1	-	5925161	5925333	5923949	5924093	5926432	5926518	0.000847449	0.0475192	-0.096
ENSG00000117479.8	SLC19A2	chr1	-	169446392	169446995	169439201	169439424	169454800	169455241	0.000848167	0.0475351	-0.084
ENSG00000154237.8	LRRK1	chr15	+	101528838	101529018	101464715	101464934	101549041	101549268	0.00085341	0.047628	-0.15
ENSG00000160229.7	ZNF66	chr19	+	20975317	20975444	20959115	20959256	20976588	20976684	0.000856189	0.0477159	-0.057
ENSG00000247240.3	UBL7-AS1	chr15	+	74754223	74754372	74753605	74753759	74758376	74758471	0.000858575	0.0478003	-0.1
ENSG00000102312.16	PORCN	chrX	+	48371222	48371240	48370976	48371107	48372627	48372753	0.000858332	0.0478003	0.177
ENSG00000116698.16	SMG7	chr1	+	183442855	183443033	183441701	183441784	183470265	183470402	0.000859227	0.0478122	0.187
ENSG00000205581.6	HMGN1	chr21	-	40717755	40717884	40717071	40717200	40719304	40719404	0.000860979	0.0478611	-0.081
ENSG00000143093.10	STRIP1	chr1	+	110591733	110591860	110590393	110590491	110592964	110593031	0.000862633	0.0478801	-0.089
ENSG00000108433.11	GOSR2	chr17	+	45009432	45009565	45006885	45006950	45015964	45016070	0.00086197	0.0478801	0.232
ENSG00000106070.13	GRB10	chr7	-	50823583	50823753	50742132	50742355	50860920	50861159	0.000863557	0.0479071	-0.06
ENSG00000135845.5	PIGC	chr1	-	172366303	172366412	172362273	172363550	172368958	172369056	0.00086502	0.0479639	0.067
ENSG00000137411.12	VARS2	chr6	+	30882586	30882814	30881981	30882121	30882932	30883014	0.0008672	0.0479786	0.057
ENSG00000173402.7	DAG1	chr3	+	49508397	49508482	49507564	49507866	49524686	49524848	0.000867491	0.0479786	0.077
ENSG00000171604.7	CXXC5	chr5	+	139059431	139059525	139027488	139027589	139059948	139060141	0.000873768	0.0482048	-0.06
ENSG00000184465.11	WDR27	chr6	-	170043792	170043882	170034523	170034621	170049293	170049329	0.000877815	0.0484037	-0.17
ENSG00000101306.6	MYLK2	chr20	+	30418815	30418944	30418621	30418692	30419505	30419658	0.000878692	0.0484128	-0.347
ENSG00000104164.6	BLOC1S6	chr15	+	45895301	45895385	45884321	45884474	45897625	45897712	0.000882462	0.048562	-0.056
ENSG00000120868.9	APAF1	chr12	+	99097148	99097277	99093185	99093347	99100262	99100388	0.000883126	0.0485742	-0.064
ENSG00000118495.14	PLAGL1	chr6	-	144281605	144281679	144262560	144263800	144285923	144285955	0.000884629	0.048608	-0.121
ENSG00000251247.5	ZNF345	chr19	+	37345351	37345496	37342731	37342806	37367686	37367956	0.000888572	0.0487757	-0.051
ENSG00000162004.12	CCDC78	chr16	-	775412	775591	774983	775293	775793	775855	0.000889804	0.0488188	0.121
ENSG00000138709.13	LARP1B	chr4	+	129127582	129127692	129121675	129121820	129128410	129128538	0.000891659	0.048896	0.114
ENSG00000156398.8	SFXN2	chr10	+	104491908	104491975	104489479	104489565	104492615	104492665	0.000895663	0.0490419	0.172
ENSG00000114021.7	NIT2	chr3	+	100064428	100064522	100053544	100053642	100067646	100067725	0.000895246	0.0490419	0.193
ENSG00000069869.11	NEDD4	chr15	-	56284123	56284203	56258670	56258744	56285708	56285800	0.000898132	0.0490622	-0.1
ENSG00000105755.3	ETHE1	chr19	-	44030666	44030811	44015588	44015718	44031248	44031353	0.000898275	0.0490622	0.056
ENSG00000166762.12	CATSPER2	chr15	-	43941924	43942077	43940114	43940264	43956615	43956741	0.000897612	0.0490622	0.101
ENSG00000028203.13	VEZT	chr12	+	95637716	95637785	95617955	95618012	95645715	95645847	0.000897856	0.0490622	0.164
ENSG00000163900.6	TMEM41A	chr3	-	185212410	185212549	185206732	185206804	185214615	185214769	0.00089771	0.0490622	0.208
ENSG00000204406.7	MBD5	chr2	+	148811959	148812018	148778595	148778615	148936268	148936362	0.000899151	0.0490855	0.377
ENSG00000103121.4	CMC2	chr16	-	81034852	81034939	81031889	81031959	81040338	81040463	0.000901893	0.0491617	-0.111
ENSG00000122481.12	RWDD3	chr1	+	95705332	95705465	95699758	95699871	95709766	95709967	0.000901551	0.0491617	0.19
ENSG00000165028.7	NIPSNAP3B	chr9	+	107528605	107528816	107526437	107526581	107531143	107531302	0.000907941	0.0493512	-0.157
ENSG00000178795.5	GDPD4	chr11	-	76944069	76944217	76940194	76940277	76969430	76969587	0.00090792	0.0493512	0.063
ENSG00000111731.8	C2CD5	chr12	-	22612425	22612476	22609904	22610095	22622642	22622729	0.000909415	0.0493995	0.054
ENSG00000160404.13	TOR2A	chr9	-	130496577	130496843	130493803	130495839	130497398	130497571	0.000913343	0.0495883	-0.089
ENSG00000169379.11	ARL13B	chr3	+	93714721	93714788	93699057	93699326	93754174	93754280	0.000914657	0.049635	0.227
ENSG00000156162.12	DPY19L4	chr8	+	95750596	95750687	95738558	95738669	95751640	95751762	0.000917391	0.0496848	-0.061
ENSG00000113761.7	ZNF346	chr5	+	176471389	176471534	176468126	176468230	176489058	176489152	0.000920659	0.0497941	-0.136
ENSG00000127311.5	HELB	chr12	+	66707765	66707943	66703485	66704388	66709021	66709163	0.000921328	0.0497995	0.064

## Sheet: NT C16 vs DM MXE
GeneID	geneSymbol	chr	strand	1stExonStart_0base	1stExonEnd	2ndExonStart_0base	2ndExonEnd	upstreamES	upstreamEE	downstreamES	downstreamEE	PValue	FDR	IncLevelDifference
ENSG00000198625.8	MDM4	chr1	+	204501318	204501374	204506557	204506625	204495487	204495562	204507336	204507436	0	0	-0.455
ENSG00000198625.8	MDM4	chr1	+	204499811	204499945	204506557	204506625	204495487	204495562	204507336	204507436	0	0	-0.212
ENSG00000198625.8	MDM4	chr1	+	204501318	204501374	204506586	204506625	204499811	204499945	204507336	204507436	0	0	-0.164
ENSG00000198625.8	MDM4	chr1	+	204499811	204499945	204501318	204501374	204495487	204495562	204507336	204507436	7.99361e-14	4.80476e-10	0.175
ENSG00000198625.8	MDM4	chr1	+	204495487	204495562	204506557	204506625	204494611	204494724	204507336	204507436	3.56604e-13	1.71476e-09	-0.172
ENSG00000198625.8	MDM4	chr1	+	204495487	204495562	204506586	204506625	204494611	204494724	204507336	204507436	3.28049e-12	1.12675e-08	-0.136
ENSG00000137821.7	LRRC49	chr15	+	71203870	71203937	71211388	71211532	71196890	71197094	71229099	71229161	2.83578e-11	8.52257e-08	0.546
ENSG00000181790.6	BAI1	chr8	+	143604001	143604071	143605598	143605665	143602183	143602286	143607902	143607988	3.94389e-11	1.05359e-07	0.431
ENSG00000198625.8	MDM4	chr1	+	204507336	204507436	204511911	204512072	204501318	204501374	204515924	204516005	7.27097e-11	1.74816e-07	-0.15
ENSG00000188672.12	RHCE	chr1	-	25701839	25701919	25712201	25712335	25696957	25697031	25715466	25715604	2.34004e-10	4.68847e-07	0.71
ENSG00000118369.8	USP35	chr11	+	77911695	77911854	77916887	77917085	77911178	77911280	77918575	77918669	7.50904e-09	1.28957e-05	-0.135
ENSG00000058673.11	ZC3H11A	chr1	+	203765420	203765624	203772084	203772144	203764826	203764903	203786053	203786252	1.29099e-08	2.06929e-05	0.07
ENSG00000221978.7	CCNL2	chr1	-	1323871	1323890	1324005	1324123	1323333	1323445	1325609	1325751	4.15894e-08	5.55518e-05	-0.298
ENSG00000244026.2	FAM86DP	chr3	-	75476577	75476843	75478286	75478388	75475600	75475750	75479982	75480065	4.08845e-08	5.55518e-05	-0.292
ENSG00000176834.9	VSIG10	chr12	-	118509163	118509274	118511503	118511797	118508856	118508872	118517150	118517411	4.39943e-08	5.56713e-05	-0.277
ENSG00000055955.11	ITIH4	chr3	-	52852272	52852299	52852477	52852552	52850899	52851074	52853408	52853534	4.89252e-08	5.88154e-05	0.341
ENSG00000006837.7	CDKL3	chr5	-	133685939	133686118	133695587	133695782	133657481	133657594	133702049	133702214	1.57677e-07	0.000164828	0.39
ENSG00000167524.10	SGK494	chr17	-	26938410	26938674	26938785	26938813	26938160	26938271	26939061	26939102	2.20746e-07	0.000221142	-0.236
ENSG00000114923.12	SLC4A3	chr2	+	220494301	220494417	220494874	220495074	220493865	220494143	220496689	220496838	2.37173e-07	0.000228094	-0.468
ENSG00000225241.3	RP11-640M9.2	chr1	+	144606937	144607061	144614553	144614733	144606368	144606510	144614839	144614993	3.35025e-07	0.000293617	-0.46
ENSG00000092199.13	HNRNPC	chr14	-	21704531	21704619	21730759	21730927	21702111	21702388	21731469	21731495	5.76945e-07	0.000478327	-0.151
ENSG00000156482.6	RPL30	chr8	-	99057170	99057316	99057574	99057627	99037078	99037966	99057735	99057776	6.64566e-07	0.000532606	0.093
ENSG00000250903.4	GMDS-AS1	chr6	+	2269931	2270033	2272049	2273651	2263834	2263918	2283732	2284008	1.41356e-06	0.00109633	0.121
ENSG00000203705.6	TATDN3	chr1	+	212976042	212976105	212977661	212977771	212970453	212970538	212977937	212977993	1.84118e-06	0.00138336	0.142
ENSG00000115211.11	EIF2B4	chr2	-	27590323	27590426	27590891	27590980	27589940	27590068	27591238	27591330	2.13157e-06	0.00155301	-0.063
ENSG00000011451.13	WIZ	chr19	-	15538920	15539319	15540396	15540900	15537792	15538344	15541822	15541993	3.65341e-06	0.00232559	0.092
ENSG00000257103.4	LSM14A	chr19	+	34710610	34710782	34712411	34712643	34706500	34706566	34717312	34717369	3.6756e-06	0.00232559	0.094
ENSG00000158411.6	MITD1	chr2	-	99787805	99787892	99787972	99788109	99786999	99787115	99790377	99790479	6.04602e-06	0.00346106	0.104
ENSG00000125846.11	ZNF133	chr20	+	18285651	18285822	18286324	18286451	18278932	18279108	18286941	18287037	9.59865e-06	0.00501696	0.127
ENSG00000162604.8	TM2D1	chr1	-	62149088	62149218	62160368	62160442	62146717	62147022	62166605	62166697	1.22888e-05	0.00590917	-0.144
ENSG00000108773.6	KAT2A	chr17	-	40271071	40271454	40271554	40271736	40270314	40270421	40272047	40272137	1.22882e-05	0.00590917	0.097
ENSG00000186074.14	CD300LF	chr17	-	72692333	72692356	72694507	72694620	72691863	72691998	72700616	72700955	1.30104e-05	0.00591509	-0.191
ENSG00000101294.12	HM13	chr20	+	30147413	30147450	30149436	30149539	30142548	30142632	30156922	30157221	1.28263e-05	0.00591509	-0.135
ENSG00000111215.7	PRR4	chr12	-	11126253	11126320	11199618	11199787	11035659	11035695	11324020	11324143	1.31279e-05	0.00591509	-0.075
ENSG00000168961.12	LGALS9	chr17	+	25972886	25972937	25973572	25973614	25969263	25969374	25974055	25974144	1.35667e-05	0.00591509	0.051
ENSG00000186074.14	CD300LF	chr17	-	72694507	72694620	72699173	72699237	72691863	72691998	72700616	72700955	1.35023e-05	0.00591509	0.055
ENSG00000111271.10	ACAD10	chr12	+	112125861	112126022	112128862	112128972	112123880	112124043	112130500	112130553	1.49257e-05	0.00598347	-0.471
ENSG00000101052.8	IFT52	chr20	+	42223332	42223457	42225074	42225162	42219629	42219669	42232399	42232529	1.42938e-05	0.00598347	-0.121
ENSG00000187790.6	FANCM	chr14	+	45618039	45618198	45620599	45620731	45606271	45606444	45623122	45623255	1.71524e-05	0.00654596	0.054
ENSG00000006837.7	CDKL3	chr5	-	133657481	133657594	133695587	133695782	133655048	133655188	133702049	133702214	1.7576e-05	0.00660279	0.242
ENSG00000171163.11	ZNF692	chr1	-	249152026	249152058	249152329	249152520	249151432	249151696	249153116	249153140	1.8919e-05	0.00677657	-0.146
ENSG00000166171.8	DPCD	chr10	+	103354414	103354495	103360494	103360619	103348044	103348157	103360959	103361093	1.90548e-05	0.00677657	0.116
ENSG00000213889.6	PPM1N	chr19	+	46003206	46003324	46003713	46003819	46000508	46000601	46003907	46003968	1.97296e-05	0.00677657	0.206
ENSG00000226435.6	ANKRD18DP	chr3	-	197794311	197794365	197799626	197799701	197792623	197792677	197803666	197803883	2.50592e-05	0.00814186	-0.191
ENSG00000058673.11	ZC3H11A	chr1	+	203770702	203770756	203772084	203772144	203765420	203765624	203786053	203786252	2.7459e-05	0.00868678	0.089
ENSG00000197816.9	CCDC180	chr9	+	100013822	100013839	100038850	100038979	100013073	100013125	100039837	100039908	3.49595e-05	0.0102	-0.436
ENSG00000103121.4	CMC2	chr16	-	81025358	81025562	81030527	81030625	81015410	81015482	81030918	81031034	3.53487e-05	0.0102	-0.366
ENSG00000168679.13	SLC16A4	chr1	-	110924273	110924417	110925455	110925588	110923603	110923765	110931858	110931977	3.56362e-05	0.0102	0.25
ENSG00000007341.14	ST7L	chr1	-	113134146	113134225	113140592	113140708	113124996	113125094	113153462	113153625	4.03472e-05	0.0114126	-0.327
ENSG00000178795.5	GDPD4	chr11	-	76944069	76944217	76969430	76969587	76940194	76940277	76979501	76979584	4.46041e-05	0.0119204	-0.392
ENSG00000104093.9	DMXL2	chr15	-	51755575	51755693	51757762	51757848	51750905	51750992	51758380	51758508	4.36657e-05	0.0119204	-0.062
ENSG00000113360.12	DROSHA	chr5	-	31435871	31435971	31437345	31437405	31431682	31431785	31448653	31448714	4.51173e-05	0.0119204	0.098
ENSG00000268163.1	AC004076.9	chr19	-	57967493	57967550	57988001	57988040	57966815	57967111	57988644	57988904	5.09691e-05	0.0131769	0.163
ENSG00000063978.11	RNF4	chr4	+	2502385	2502465	2513682	2513692	2492063	2492229	2514164	2514324	5.08019e-05	0.0131769	0.189
ENSG00000134283.13	PPHLN1	chr12	+	42748962	42749024	42768664	42768876	42729684	42729776	42781257	42781337	5.27977e-05	0.0133623	-0.069
ENSG00000114867.15	EIF4G1	chr3	+	184033859	184034006	184035108	184035285	184033550	184033644	184035534	184035604	5.50455e-05	0.0136439	0.1
ENSG00000165891.11	E2F7	chr12	-	77421662	77421918	77423610	77424112	77415027	77417965	77426829	77426902	5.82623e-05	0.014008	0.075
ENSG00000119640.4	ACYP1	chr14	-	75528386	75528465	75530172	75530264	75526550	75526964	75530656	75530710	7.16754e-05	0.0165701	-0.116
ENSG00000084676.11	NCOA1	chr2	+	24985555	24985645	24990947	24991004	24980841	24981025	24991089	24993571	7.7266e-05	0.017201	-0.114
ENSG00000120992.13	LYPLA1	chr8	-	54965214	54965316	54967619	54967693	54963571	54963706	55013467	55013499	8.18358e-05	0.0178871	-0.112
ENSG00000072274.8	TFRC	chr3	-	195802029	195802231	195803934	195803993	195801067	195801304	195808913	195808961	8.39187e-05	0.0180867	0.162
ENSG00000235944.3	ZNF815P	chr7	+	5870811	5870914	5873157	5873199	5862790	5863157	5879579	5879706	8.42538e-05	0.0180867	0.308
ENSG00000131374.10	TBC1D5	chr3	-	17549965	17550097	17665340	17665405	17447909	17448018	17780834	17780971	9.15949e-05	0.0190311	-0.259
ENSG00000239998.1	LILRA2	chr19	+	55085164	55085379	55085767	55086049	55084494	55084902	55086197	55086500	9.18191e-05	0.0190311	0.068
ENSG00000177565.11	TBL1XR1	chr3	-	176797614	176797733	176804752	176804829	176782707	176782810	176816253	176816329	9.4075e-05	0.019332	-0.053
ENSG00000244026.2	FAM86DP	chr3	-	75476577	75476843	75476925	75477059	75475600	75475750	75479982	75480065	9.80858e-05	0.0198174	-0.38
ENSG00000171097.9	CCBL1	chr9	-	131600329	131600416	131600496	131600646	131599080	131599201	131604932	131605080	0.000119043	0.0223606	-0.063
ENSG00000173264.9	GPR137	chr11	+	64053981	64054353	64054436	64054486	64052528	64052852	64055192	64055418	0.000118576	0.0223606	0.222
ENSG00000171163.11	ZNF692	chr1	-	249152026	249152058	249152329	249152520	249151432	249151696	249152710	249153059	0.000123402	0.0226048	-0.1
ENSG00000135250.12	SRPK2	chr7	-	104909252	104909316	104937867	104937980	104844140	104844232	104946882	104947018	0.000124104	0.0226048	0.068
ENSG00000121940.11	CLCC1	chr1	-	109492441	109492543	109492930	109493060	109490232	109490340	109505982	109506111	0.000133301	0.0237404	0.061
ENSG00000131236.12	CAP1	chr1	+	40507100	40507165	40523117	40523167	40506451	40506473	40525008	40525130	0.000134493	0.0237766	-0.104
ENSG00000122741.11	DCAF10	chr9	+	37819284	37819398	37854776	37854979	37800789	37801402	37860044	37860190	0.000140756	0.0245889	-0.107
ENSG00000198604.6	BAZ1A	chr14	-	35252967	35253133	35254982	35255207	35252324	35252438	35261980	35262127	0.000141889	0.0245889	0.051
ENSG00000111364.11	DDX55	chr12	+	124101057	124101150	124103215	124103384	124099731	124099863	124103994	124104263	0.000144202	0.0245889	0.08
ENSG00000025423.7	HSD17B6	chr12	+	57156987	57157198	57175757	57176016	57146236	57146365	57178636	57178800	0.000144201	0.0245889	0.173
ENSG00000135205.10	CCDC146	chr7	+	76796974	76797141	76866263	76866346	76751933	76752049	76871007	76871217	0.00014234	0.0245889	0.177
ENSG00000092529.18	CAPN3	chr15	+	42682150	42682294	42684836	42684920	42681125	42681294	42686453	42686539	0.000153238	0.025235	-0.092
ENSG00000205581.6	HMGN1	chr21	-	40717755	40717884	40719304	40719409	40717071	40717200	40720217	40720265	0.000155055	0.0253605	0.086
ENSG00000108264.12	TADA2A	chr17	+	35804797	35804870	35818625	35818689	35800605	35800763	35822181	35822225	0.000173701	0.0274756	0.057
ENSG00000163697.12	APBB2	chr4	-	41102655	41102767	41145003	41145159	41035252	41035321	41216421	41216502	0.000176974	0.0278104	-0.174
ENSG00000120029.8	C10orf76	chr10	-	103717406	103717489	103734968	103735057	103716353	103716480	103750307	103750368	0.000184863	0.0284761	0.124
ENSG00000162591.11	MEGF6	chr1	-	3410334	3410361	3410559	3410688	3409202	3409331	3410934	3411063	0.000187958	0.0284761	0.259
ENSG00000172869.10	DMXL1	chr5	+	118503297	118503559	118505884	118506975	118502310	118502476	118507472	118507664	0.000193305	0.0290477	0.135
ENSG00000214783.5	POLR2J4	chr7	-	44053191	44053278	44054204	44054382	44027684	44027846	44056032	44056122	0.000209453	0.0308428	0.081
ENSG00000165046.8	LETM2	chr8	+	38251700	38251759	38257789	38257927	38250059	38250513	38260042	38260162	0.000211167	0.0308428	0.203
ENSG00000100697.10	DICER1	chr14	-	95600697	95600840	95606995	95607096	95599651	95599840	95623566	95623607	0.00023035	0.0329661	-0.095
ENSG00000105953.10	OGDH	chr7	+	44687042	44687133	44687255	44687358	44684925	44685117	44706334	44706450	0.000235477	0.0335005	0.055
ENSG00000156650.8	KAT6B	chr10	+	76719727	76719836	76729417	76729533	76602357	76603236	76729777	76729859	0.000243795	0.0342781	-0.113
ENSG00000144218.14	AFF3	chr2	-	100728847	100728986	100745685	100745768	100726306	100726795	100758945	100759057	0.000247624	0.034614	0.093
ENSG00000108264.12	TADA2A	chr17	+	35804797	35804870	35822181	35822225	35800605	35800763	35825534	35825645	0.00026007	0.0360144	0.063
ENSG00000131374.10	TBC1D5	chr3	-	17469941	17470011	17549965	17550097	17447909	17448018	17664139	17664257	0.000263633	0.0360144	0.088
ENSG00000170919.11	TPT1-AS1	chr13	+	45918888	45919044	45944214	45944317	45918513	45918581	45951195	45951350	0.000263197	0.0360144	0.095
ENSG00000156026.10	MCU	chr10	+	74474868	74474984	74496242	74496329	74451900	74452059	74594116	74594178	0.000267956	0.0363982	-0.191
ENSG00000143702.11	CEP170	chr1	-	243305587	243305765	243319522	243319757	243303238	243303409	243327585	243329418	0.000274131	0.0370277	0.052
ENSG00000028203.13	VEZT	chr12	+	95676088	95676135	95681439	95681633	95668517	95668665	95688047	95688148	0.000281206	0.0375613	-0.076
ENSG00000130158.9	DOCK6	chr19	-	11339973	11340066	11343878	11344042	11339615	11339711	11346273	11346435	0.000287357	0.0381709	-0.071
ENSG00000242294.2	STAG3L5P	chr7	+	99935801	99935887	99936395	99936512	99933747	99933843	99938567	99938951	0.000305508	0.040359	-0.087
ENSG00000161681.11	SHANK1	chr19	-	51214627	51214744	51215203	51215371	51207693	51207771	51217054	51217206	0.00032126	0.0422079	0.066
ENSG00000137154.8	RPS6	chr9	-	19378365	19378512	19378705	19378916	19376491	19376649	19379484	19379616	0.000326063	0.0426062	0.063
ENSG00000103121.4	CMC2	chr16	-	81022144	81022201	81030527	81030625	81015410	81015482	81030918	81031034	0.000347119	0.0446299	-0.431
ENSG00000172830.8	SSH3	chr11	+	67075316	67075410	67075644	67075773	67074841	67074907	67075882	67075929	0.000354537	0.0451012	-0.063
ENSG00000227354.2	RBM26-AS1	chr13	+	79989396	79989499	79991969	79992051	79986816	79987042	79994894	79994950	0.000361252	0.0457136	-0.245
ENSG00000168010.6	ATG16L2	chr11	+	72532712	72532786	72533088	72533340	72528800	72528900	72533522	72533588	0.000368571	0.0463956	0.091
ENSG00000187741.10	FANCA	chr16	-	89805536	89805697	89805885	89805961	89805151	89805382	89806401	89806507	0.000381849	0.0471666	-0.065
ENSG00000266714.2	MYO15B	chr17	+	73587696	73587793	73588057	73588161	73587252	73587327	73588318	73588382	0.000384384	0.0471666	0.145
ENSG00000238083.3	LRRC37A2	chr17	+	44597577	44597649	44601169	44601250	44594727	44594799	44617541	44617613	0.000380216	0.0471666	0.162
ENSG00000147044.16	CASK	chrX	-	41416284	41416353	41419031	41419100	41412971	41413168	41420811	41420880	0.00038725	0.0472622	-0.161
ENSG00000154134.10	ROBO3	chr11	+	124747056	124747080	124747180	124747205	124746737	124746828	124747414	124747554	0.000396143	0.0481033	0.255
ENSG00000236423.1	RP13-15E13.1	chr1	+	3820528	3820600	3830255	3830854	3816979	3817195	3830958	3832011	0.000402914	0.0484363	-0.278
ENSG00000250337.1	LINC01021	chr5	+	27475641	27475802	27477745	27477908	27472413	27472626	27485032	27485136	0.000401417	0.0484363	-0.072
ENSG00000178115.10	GOLGA8Q	chr15	+	30851425	30851494	30852738	30852814	30850913	30851170	30853245	30853337	0.000420825	0.0499834	0.074

## Sheet: NT C16 vs DM RI
GeneID	geneSymbol	chr	strand	riExonStart_0base	riExonEnd	upstreamES	upstreamEE	downstreamES	downstreamEE	PValue	FDR	IncLevelDifference
ENSG00000168488.14	ATXN2L	chr16	+	28847253	28848558	28847253	28847443	28848048	28848558	4.36651e-13	1.94048e-09	-0.129
ENSG00000131051.16	RBM39	chr20	-	34326889	34328809	34326889	34326939	34328745	34328809	3.73139e-11	8.29116e-08	-0.084
ENSG00000111801.11	BTN3A3	chr6	+	26448475	26448982	26448475	26448676	26448955	26448982	6.16999e-10	6.85486e-07	-0.458
ENSG00000128159.7	TUBGCP6	chr22	-	50658385	50660303	50658385	50658444	50658679	50660303	4.63861e-10	6.85486e-07	-0.17
ENSG00000157873.13	TNFRSF14	chr1	+	2489781	2491417	2489781	2489907	2491261	2491417	3.99506e-09	2.95901e-06	-0.094
ENSG00000151651.11	ADAM8	chr10	-	135086757	135087342	135086757	135086934	135087265	135087342	3.43313e-08	1.6952e-05	-0.354
ENSG00000119707.9	RBM25	chr14	+	73566374	73570186	73566374	73566458	73569899	73570186	4.92608e-08	2.18915e-05	-0.086
ENSG00000196684.8	HSH2D	chr19	+	16263361	16264018	16263361	16263451	16263841	16264018	8.47004e-08	3.42189e-05	-0.278
ENSG00000014914.15	MTMR11	chr1	-	149902256	149902857	149902256	149902439	149902683	149902857	1.12536e-07	4.16757e-05	-0.131
ENSG00000151923.13	TIAL1	chr10	-	121336122	121336715	121336122	121336262	121336591	121336715	1.36278e-07	4.65862e-05	-0.056
ENSG00000168488.14	ATXN2L	chr16	+	28847253	28848558	28847253	28847443	28848071	28848558	1.61679e-07	5.13217e-05	-0.076
ENSG00000103245.9	NARFL	chr16	-	780842	782900	780842	781000	782300	782900	3.03125e-07	8.98057e-05	-0.172
ENSG00000238105.3	GOLGA2B	chr12	-	100550942	100551517	100550942	100551034	100551305	100551517	3.65073e-07	0.000101399	-0.409
ENSG00000100629.12	CEP128	chr14	-	81296508	81297638	81296508	81296627	81297486	81297638	4.02208e-07	0.000105142	-0.184
ENSG00000137752.18	CASP1	chr11	-	104896234	104897083	104896234	104896327	104896952	104897083	6.57823e-07	0.000162409	-0.121
ENSG00000165801.5	ARHGEF40	chr14	+	21555159	21555622	21555159	21555264	21555478	21555622	7.28873e-07	0.00017048	-0.138
ENSG00000146083.7	RNF44	chr5	-	175956731	175957207	175956731	175956819	175957082	175957207	8.51329e-07	0.000189165	-0.066
ENSG00000203965.8	EFCAB7	chr1	+	64033980	64036799	64033980	64034190	64036691	64036799	1.1273e-06	0.000227715	0.091
ENSG00000170889.9	RPS9	chr19	+	54710420	54711515	54710420	54710592	54711265	54711515	1.4676e-06	0.000283072	0.104
ENSG00000179532.8	DNHD1	chr11	+	6591238	6593257	6591238	6592653	6592865	6593257	1.59244e-06	0.000283072	0.268
ENSG00000178038.12	ALS2CL	chr3	-	46718131	46718512	46718131	46718228	46718338	46718512	1.82001e-06	0.000311081	-0.397
ENSG00000169045.13	HNRNPH1	chr5	-	179047892	179048398	179047892	179048036	179048242	179048398	2.26836e-06	0.000373355	-0.057
ENSG00000124228.10	DDX27	chr20	+	47850104	47852768	47850104	47850246	47852686	47852768	2.81381e-06	0.000416819	-0.087
ENSG00000197114.7	ZGPAT	chr20	+	62364938	62366176	62364938	62365091	62365996	62366176	3.13034e-06	0.00044875	-0.119
ENSG00000090621.9	PABPC4	chr1	-	40026487	40027875	40026487	40026794	40027744	40027875	3.57916e-06	0.000497055	-0.118
ENSG00000184056.10	VPS33B	chr15	-	91549601	91550276	91549601	91549675	91550179	91550276	4.57538e-06	0.000591901	-0.105
ENSG00000092199.13	HNRNPC	chr14	-	21731469	21731988	21731469	21731495	21731825	21731988	4.66168e-06	0.000591901	-0.081
ENSG00000162231.9	NXF1	chr11	-	62566010	62567958	62566010	62566047	62567848	62567958	5.3682e-06	0.000644764	-0.085
ENSG00000188493.10	C19orf54	chr19	-	41246760	41248675	41246760	41247344	41248419	41248675	5.5232e-06	0.000645924	0.062
ENSG00000134222.12	PSRC1	chr1	-	109825301	109825744	109825301	109825411	109825695	109825744	9.34417e-06	0.000988702	-0.173
ENSG00000163781.8	TOPBP1	chr3	-	133317018	133317474	133317018	133317306	133317399	133317474	1.09915e-05	0.00113595	-0.184
ENSG00000015479.13	MATR3	chr5	+	138650363	138651877	138650363	138650425	138651764	138651877	1.28301e-05	0.00127332	-0.126
ENSG00000141499.12	WRAP53	chr17	+	7591794	7592397	7591794	7591879	7591965	7592397	1.4826e-05	0.00143232	0.08
ENSG00000072134.11	EPN2	chr17	+	19185267	19187027	19185267	19185390	19186262	19187027	1.64345e-05	0.00152156	-0.188
ENSG00000114735.5	HEMK1	chr3	+	50617274	50617660	50617274	50617370	50617546	50617660	1.75535e-05	0.001592	-0.082
ENSG00000170638.5	TRABD	chr22	+	50636251	50636615	50636251	50636424	50636503	50636615	2.05331e-05	0.0017892	-0.064
ENSG00000132781.13	MUTYH	chr1	-	45798434	45798842	45798434	45798506	45798768	45798842	2.32242e-05	0.00179274	-0.163
ENSG00000173821.15	RNF213	chr17	+	78362411	78363167	78362411	78362489	78362972	78363167	2.24468e-05	0.00179274	-0.116
ENSG00000111877.13	MCM9	chr6	-	119231761	119234585	119231761	119232934	119234459	119234585	2.35805e-05	0.00179274	-0.072
ENSG00000165792.13	METTL17	chr14	+	21462952	21463392	21462952	21463060	21463323	21463392	2.38412e-05	0.00179274	-0.07
ENSG00000108465.10	CDK5RAP3	chr17	+	46050884	46051397	46050884	46051062	46051296	46051397	2.31951e-05	0.00179274	-0.069
ENSG00000087095.8	NLK	chr17	+	26521607	26523407	26521607	26521734	26523205	26523407	2.38231e-05	0.00179274	0.065
ENSG00000138002.10	IFT172	chr2	-	27680707	27681090	27680707	27680843	27680992	27681090	2.42043e-05	0.00179274	0.086
ENSG00000159403.11	C1R	chr12	-	7244047	7245037	7244047	7244276	7244982	7245037	3.22634e-05	0.00231256	0.367
ENSG00000128699.9	ORMDL1	chr2	-	190647147	190647849	190647147	190647328	190647739	190647849	3.35451e-05	0.00236626	-0.114
ENSG00000168488.14	ATXN2L	chr16	+	28847253	28848558	28847253	28847806	28848048	28848558	3.56316e-05	0.0024361	-0.066
ENSG00000110455.9	ACCS	chr11	+	44099394	44100334	44099394	44099472	44100233	44100334	4.11405e-05	0.00277013	-0.17
ENSG00000141503.11	MINK1	chr17	+	4792941	4794030	4792941	4793058	4793811	4794030	4.21962e-05	0.0027988	-0.107
ENSG00000126088.8	UROD	chr1	+	45479580	45480508	45479580	45479742	45480407	45480508	4.55565e-05	0.00297725	-0.087
ENSG00000095066.7	HOOK2	chr19	-	12885482	12885711	12885482	12885555	12885625	12885711	4.75515e-05	0.00306259	-0.068
ENSG00000196998.11	WDR45	chrX	-	48934303	48935570	48934303	48934412	48935495	48935570	5.42609e-05	0.00330323	-0.145
ENSG00000132274.11	TRIM22	chr11	+	5718477	5719775	5718477	5718573	5719544	5719775	5.36235e-05	0.00330323	-0.055
ENSG00000269640.1	CTD-2521M24.9	chr19	+	17523905	17524114	17523905	17523913	17524029	17524114	5.29714e-05	0.00330323	0.115
ENSG00000109736.10	MFSD10	chr4	-	2933101	2933663	2933101	2933192	2933551	2933663	5.73541e-05	0.00336232	-0.115
ENSG00000090316.11	MAEA	chr4	+	1330648	1332405	1330648	1330782	1332213	1332405	5.61299e-05	0.00336232	-0.114
ENSG00000054148.13	PHPT1	chr9	+	139744464	139745012	139744464	139744589	139744957	139745012	5.75014e-05	0.00336232	-0.096
ENSG00000137802.9	MAPKBP1	chr15	+	42104713	42105299	42104713	42104851	42105116	42105299	5.94508e-05	0.00342755	-0.126
ENSG00000152582.8	SPEF2	chr5	+	35697791	35700854	35697791	35697895	35700597	35700854	6.96617e-05	0.00386971	-0.157
ENSG00000197381.11	ADARB1	chr21	+	46641932	46646475	46641932	46643492	46645461	46646475	7.43904e-05	0.00408137	0.068
ENSG00000115875.14	SRSF7	chr2	-	38975720	38976847	38975720	38975795	38976670	38976847	8.66662e-05	0.00469689	-0.061
ENSG00000163161.8	ERCC3	chr2	-	128046912	128047400	128046912	128047095	128047264	128047400	9.02351e-05	0.00478706	-0.095
ENSG00000006047.8	YBX2	chr17	-	7194411	7195378	7194411	7194501	7195344	7195378	0.00010154	0.00503578	-0.359
ENSG00000182325.6	FBXL6	chr8	-	145580649	145581162	145580649	145580781	145581116	145581162	0.00010158	0.00503578	-0.068
ENSG00000168237.13	GLYCTK	chr3	+	52326275	52327491	52326275	52327190	52327322	52327491	0.000105443	0.00509334	-0.058
ENSG00000142546.9	NOSIP	chr19	-	50060346	50062235	50060346	50061456	50062153	50062235	0.000107637	0.00509835	-0.052
ENSG00000103507.9	BCKDK	chr16	+	31123189	31123888	31123189	31123348	31123441	31123888	0.000109289	0.00511242	0.063
ENSG00000177595.13	PIDD	chr11	-	800761	801120	800761	800912	801017	801120	0.000115444	0.00534409	0.098
ENSG00000213983.7	AP1G2	chr14	-	24032588	24032847	24032588	24032711	24032792	24032847	0.000117188	0.00536889	-0.106
ENSG00000178922.12	HYI	chr1	-	43916823	43917215	43916823	43916982	43917080	43917215	0.000120735	0.00547498	-0.17
ENSG00000004534.10	RBM6	chr3	+	50098894	50099541	50098894	50098980	50099394	50099541	0.000127144	0.00570733	-0.081
ENSG00000137474.15	MYO7A	chr11	+	76922865	76924080	76922865	76922976	76923996	76924080	0.000138761	0.00604564	0.278
ENSG00000101194.13	SLC17A9	chr20	+	61598054	61599949	61598054	61598084	61598688	61599949	0.000144622	0.00623398	0.064
ENSG00000110583.8	NAA40	chr11	+	63713311	63714475	63713311	63713407	63714196	63714475	0.000161451	0.0067055	-0.083
ENSG00000167419.6	LPO	chr17	+	56320338	56321442	56320338	56320416	56321354	56321442	0.000164069	0.00675113	0.215
ENSG00000213983.7	AP1G2	chr14	-	24032792	24033065	24032792	24032847	24032924	24033065	0.000178949	0.00716442	-0.096
ENSG00000169727.8	GPS1	chr17	+	80014504	80015346	80014504	80014642	80014928	80015346	0.000192911	0.00742881	-0.108
ENSG00000072778.15	ACADVL	chr17	+	7123440	7123995	7123440	7123516	7123922	7123995	0.000193203	0.00742881	-0.096
ENSG00000178761.10	FAM219B	chr15	-	75192332	75195127	75192332	75194404	75194944	75195127	0.000193866	0.00742881	-0.087
ENSG00000006282.15	SPATA20	chr17	+	48628358	48629541	48628358	48628551	48629329	48629541	0.000193911	0.00742881	-0.058
ENSG00000188878.12	FBF1	chr17	-	73910202	73911013	73910202	73910376	73910827	73911013	0.000208454	0.0078531	-0.1
ENSG00000242086.4	LINC00969	chr3	+	195435024	195435712	195435024	195435139	195435617	195435712	0.00021545	0.00804589	-0.183
ENSG00000055955.11	ITIH4	chr3	-	52852067	52852299	52852067	52852184	52852272	52852299	0.00022291	0.0081609	-0.148
ENSG00000123360.7	PDE1B	chr12	+	54964024	54966525	54964024	54964141	54966384	54966525	0.000220635	0.0081609	-0.08
ENSG00000154134.10	ROBO3	chr11	+	124747414	124748027	124747414	124747648	124747832	124748027	0.000227154	0.00817061	0.188
ENSG00000165178.8	NCF1C	chr7	-	74578130	74578824	74578130	74578238	74578701	74578824	0.000260772	0.00927097	0.195
ENSG00000077463.10	SIRT6	chr19	-	4175024	4175934	4175024	4175148	4175838	4175934	0.000269908	0.00944464	-0.074
ENSG00000012171.13	SEMA3B	chr3	+	50310965	50311259	50310965	50311077	50311189	50311259	0.000313717	0.0106424	-0.28
ENSG00000268895.1	A1BG-AS1	chr19	+	58865079	58866549	58865079	58865223	58865734	58866549	0.000329916	0.0110237	0.212
ENSG00000171777.11	RASGRP4	chr19	-	38903570	38903937	38903570	38903689	38903832	38903937	0.000332593	0.0110302	-0.212
ENSG00000225177.1	RP11-390P2.4	chr6	+	139017733	139018425	139017733	139017892	139018039	139018425	0.000353356	0.0115464	0.333
ENSG00000146063.14	TRIM41	chr5	+	180660412	180660763	180660412	180660435	180660635	180660763	0.000403404	0.0128973	-0.074
ENSG00000198753.7	PLXNB3	chrX	+	153042982	153043550	153042982	153043143	153043402	153043550	0.00041788	0.0131706	-0.404
ENSG00000117616.13	C1orf63	chr1	-	25570040	25571792	25570040	25570124	25571640	25571792	0.000430753	0.0133956	-0.064
ENSG00000175455.10	CCDC14	chr3	-	123675201	123675642	123675201	123675274	123675586	123675642	0.000436968	0.0134169	-0.08
ENSG00000205593.7	DENND6B	chr22	-	50752242	50752701	50752242	50752307	50752635	50752701	0.000452209	0.0136709	-0.056
ENSG00000213930.7	GALT	chr9	+	34647488	34647958	34647488	34647564	34647828	34647958	0.000492669	0.0145961	-0.06
ENSG00000105122.8	RASAL3	chr19	-	15568102	15569237	15568102	15568645	15569138	15569237	0.000520693	0.0152234	-0.091
ENSG00000163516.9	ANKZF1	chr2	+	220098854	220100034	220098854	220099010	220099547	220100034	0.000558495	0.0161012	-0.128
ENSG00000109065.7	NAT9	chr17	-	72768098	72768416	72768098	72768193	72768356	72768416	0.000583483	0.0161012	-0.117
ENSG00000160401.10	C9orf117	chr9	+	130474477	130475154	130474477	130474628	130474987	130475154	0.000586947	0.0161012	0.083
ENSG00000133466.9	C1QTNF6	chr22	-	37576206	37578775	37576206	37576907	37578191	37578775	0.000585301	0.0161012	0.195
ENSG00000117155.12	SSX2IP	chr1	-	85127880	85128213	85127880	85128058	85128137	85128213	0.000628146	0.0169181	-0.089
ENSG00000128604.14	IRF5	chr7	+	128587076	128587589	128587076	128587110	128587331	128587589	0.000633893	0.01697	-0.093
ENSG00000135749.14	PCNXL2	chr1	-	233353644	233353930	233353644	233353677	233353776	233353930	0.000678158	0.0179389	0.074
ENSG00000088826.13	SMOX	chr20	+	4162735	4163495	4162735	4162970	4163129	4163495	0.000690786	0.0179822	-0.065
ENSG00000170889.9	RPS9	chr19	+	54710143	54710592	54710143	54710330	54710420	54710592	0.000702068	0.0180346	0.058
ENSG00000066923.13	STAG3	chr7	+	99786075	99786639	99786075	99786152	99786434	99786639	0.000716759	0.0181077	-0.432
ENSG00000124593.10	PRICKLE4	chr6	+	41751199	41751976	41751199	41751343	41751868	41751976	0.000717137	0.0181077	-0.07
ENSG00000100938.13	GMPR2	chr14	+	24707451	24708448	24707451	24707611	24707794	24708448	0.000741178	0.0184986	-0.055
ENSG00000055609.13	KMT2C	chr7	-	151832009	151835989	151832009	151834009	151835880	151835989	0.000745105	0.0184986	-0.051
ENSG00000115042.5	FAHD2A	chr2	+	96076274	96076774	96076274	96076334	96076611	96076774	0.000795761	0.0194306	-0.052
ENSG00000172613.3	RAD9A	chr11	+	67163382	67163646	67163382	67163492	67163581	67163646	0.000792527	0.0194306	0.052
ENSG00000076662.5	ICAM3	chr19	-	10445741	10446652	10445741	10446029	10446346	10446652	0.000814951	0.0195764	-0.21
ENSG00000186862.13	PDZD7	chr10	-	102783192	102783825	102783192	102783367	102783684	102783825	0.000823063	0.019665	-0.085
ENSG00000187535.9	IFT140	chr16	-	1575887	1576797	1575887	1576078	1576619	1576797	0.000867344	0.0206122	0.128
ENSG00000185306.8	C12orf56	chr12	-	64668680	64669152	64668680	64668755	64669077	64669152	0.000878147	0.0207579	-0.053
ENSG00000181513.10	ACBD4	chr17	+	43213866	43214143	43213866	43213987	43214058	43214143	0.000886407	0.0208423	-0.163
ENSG00000226287.3	TMEM191A	chr22	+	21057920	21058328	21057920	21057980	21058255	21058328	0.000947513	0.0220458	-0.176
ENSG00000161265.10	U2AF1L4	chr19	-	36234055	36234246	36234055	36234109	36234196	36234246	0.00111778	0.0252154	0.132
ENSG00000213983.7	AP1G2	chr14	-	24034814	24035369	24034814	24034910	24035024	24035369	0.00113841	0.0255509	-0.084
ENSG00000244687.7	UBE2V1	chr20	-	48732021	48732491	48732021	48732158	48732366	48732491	0.0011747	0.0261019	0.078
ENSG00000099622.9	CIRBP	chr19	+	1271979	1274439	1271979	1272050	1274305	1274439	0.0012184	0.0268047	-0.065
ENSG00000167962.8	ZNF598	chr16	-	2052521	2053729	2052521	2052733	2053616	2053729	0.00129214	0.0281154	-0.182
ENSG00000132424.10	PNISR	chr6	-	99851704	99852578	99851704	99851758	99852478	99852578	0.00130666	0.0281884	-0.069
ENSG00000073331.13	ALPK1	chr4	+	113346820	113347699	113346820	113346907	113347622	113347699	0.00136249	0.0285035	-0.114
ENSG00000173821.15	RNF213	chr17	+	78355346	78356870	78355346	78355527	78356778	78356870	0.00136263	0.0285035	-0.096
ENSG00000204472.8	AIF1	chr6	+	31583446	31584283	31583446	31583513	31584120	31584283	0.00137775	0.0285035	0.091
ENSG00000108641.10	B9D1	chr17	-	19246482	19247170	19246482	19246808	19247102	19247170	0.00136262	0.0285035	0.102
ENSG00000005961.13	ITGA2B	chr17	-	42461305	42461506	42461305	42461314	42461452	42461506	0.001379	0.0285035	0.107
ENSG00000117115.8	PADI2	chr1	-	17401350	17402318	17401350	17401444	17402173	17402318	0.00137153	0.0285035	0.25
ENSG00000108465.10	CDK5RAP3	chr17	+	46051765	46052703	46051765	46051814	46052524	46052703	0.00145203	0.0291982	-0.062
ENSG00000072778.15	ACADVL	chr17	+	7125985	7126556	7125985	7126184	7126451	7126556	0.00147822	0.0294584	-0.055
ENSG00000179532.8	DNHD1	chr11	+	6569092	6569632	6569092	6569270	6569439	6569632	0.00150966	0.0296856	-0.077
ENSG00000135596.13	MICAL1	chr6	-	109772802	109773604	109772802	109772903	109773448	109773604	0.0015059	0.0296856	-0.056
ENSG00000103024.3	NME3	chr16	-	1820881	1821411	1820881	1820994	1821280	1821411	0.00149735	0.0296856	-0.051
ENSG00000127184.6	COX7C	chr5	+	85915169	85915695	85915169	85915313	85915555	85915695	0.00151758	0.0297099	-0.052
ENSG00000128694.7	OSGEPL1	chr2	-	190618641	190619071	190618641	190618790	190618866	190619071	0.00154973	0.0300743	-0.164
ENSG00000168763.11	CNNM3	chr2	+	97493467	97494871	97493467	97493637	97494732	97494871	0.00154877	0.0300743	-0.062
ENSG00000168071.17	CCDC88B	chr11	+	64118631	64119088	64118631	64118727	64118947	64119088	0.00158512	0.0301037	-0.135
ENSG00000061273.13	HDAC7	chr12	-	48183595	48185091	48183595	48183703	48185041	48185091	0.00157079	0.0301037	-0.063
ENSG00000156873.11	PHKG2	chr16	+	30762426	30762924	30762426	30762602	30762869	30762924	0.00161733	0.0304923	-0.084
ENSG00000223501.4	VPS52	chr6	-	33232150	33232677	33232150	33232274	33232558	33232677	0.0016193	0.0304923	-0.073
ENSG00000108309.8	RUNDC3A	chr17	+	42390785	42392192	42390785	42390871	42392102	42392192	0.00162758	0.0305176	-0.102
ENSG00000172543.3	CTSW	chr11	+	65650685	65651212	65650685	65650895	65650978	65651212	0.00167116	0.0308159	0.063
ENSG00000099783.7	HNRNPM	chr19	+	8530207	8530399	8530207	8530246	8530363	8530399	0.0017009	0.0312346	0.057
ENSG00000105483.12	CARD8	chr19	-	48735709	48737800	48735709	48735750	48737659	48737800	0.00182583	0.0326724	-0.069
ENSG00000066777.4	ARFGEF1	chr8	-	68255398	68255912	68255398	68255571	68255744	68255912	0.00182562	0.0326724	0.081
ENSG00000148288.7	GBGT1	chr9	-	136028339	136030699	136028339	136029648	136030564	136030699	0.00184808	0.0328348	-0.062
ENSG00000156675.11	RAB11FIP1	chr8	-	37727937	37730796	37727937	37728046	37728795	37730796	0.00194948	0.0341082	0.075
ENSG00000177595.13	PIDD	chr11	-	799814	800244	799814	800014	800130	800244	0.00205624	0.0355561	-0.076
ENSG00000112146.12	FBXO9	chr6	+	52957531	52958359	52957531	52957622	52958263	52958359	0.00217645	0.0373441	-0.053
ENSG00000100429.13	HDAC10	chr22	-	50689199	50689814	50689199	50689334	50689402	50689814	0.00222473	0.0378802	-0.072
ENSG00000172660.7	TAF15	chr17	+	34147027	34147441	34147027	34147079	34147335	34147441	0.00231214	0.039069	0.079
ENSG00000171224.7	C10orf35	chr10	+	71391235	71391595	71391235	71391303	71391464	71391595	0.00247272	0.0402692	-0.135
ENSG00000169592.10	INO80E	chr16	+	30012532	30015978	30012532	30012851	30015888	30015978	0.00245508	0.0402692	-0.128
ENSG00000100124.8	ANKRD54	chr22	-	38228964	38229213	38228964	38229089	38229165	38229213	0.00250358	0.0402692	-0.089
ENSG00000100299.13	ARSA	chr22	-	51065018	51065834	51065018	51065188	51065593	51065834	0.0024256	0.0402692	-0.08
ENSG00000111653.15	ING4	chr12	-	6761827	6762216	6761827	6761933	6762101	6762216	0.00248632	0.0402692	-0.063
ENSG00000144354.9	CDCA7	chr2	+	174228545	174229717	174228545	174228623	174229522	174229717	0.00251003	0.0402692	-0.051
ENSG00000005381.6	MPO	chr17	-	56356657	56357007	56356657	56356787	56356883	56357007	0.00242893	0.0402692	0.066
ENSG00000205726.9	ITSN1	chr21	+	35201309	35202049	35201309	35201354	35201927	35202049	0.00266806	0.0413533	-0.173
ENSG00000062524.11	LTK	chr15	-	41799292	41799855	41799292	41799488	41799711	41799855	0.00264456	0.0413533	-0.139
ENSG00000100889.7	PCK2	chr14	+	24563519	24564054	24563519	24563643	24563974	24564054	0.00259413	0.0413533	-0.093
ENSG00000134107.4	BHLHE40	chr3	+	5021646	5022093	5021646	5021716	5021985	5022093	0.00265795	0.0413533	-0.066
ENSG00000124782.15	RREB1	chr6	+	7181356	7182315	7181356	7181479	7182102	7182315	0.00282206	0.0433953	-0.058
ENSG00000125731.8	SH2D3A	chr19	-	6754261	6754742	6754261	6754436	6754626	6754742	0.00285991	0.0435254	-0.43
ENSG00000213024.6	NUP62	chr19	-	50430950	50432761	50430950	50431105	50432582	50432761	0.00290504	0.0439115	-0.067
ENSG00000235954.2	TTC28-AS1	chr22	+	28393398	28394826	28393398	28393727	28393973	28394826	0.0029678	0.0445572	-0.062
ENSG00000237037.5	NDUFA6-AS1	chr22	+	42532207	42532723	42532207	42532291	42532680	42532723	0.00310156	0.0454896	-0.207
ENSG00000110697.8	PITPNM1	chr11	-	67263648	67264907	67263648	67263816	67264701	67264907	0.00314573	0.0459856	-0.119
ENSG00000099622.9	CIRBP	chr19	+	1271979	1274806	1271979	1274439	1274647	1274806	0.00317924	0.0462977	0.065
ENSG00000222009.4	BTBD19	chr1	+	45278667	45278941	45278667	45278736	45278809	45278941	0.00318792	0.0462977	0.333
ENSG00000167524.10	SGK494	chr17	-	26938410	26938674	26938410	26938499	26938584	26938674	0.00334671	0.0478224	-0.056

## Sheet: DMSO L22KO vs NT A3SS
GeneID	geneSymbol	chr	strand	longExonStart_0base	longExonEnd	shortES	shortEE	flankingES	flankingEE	PValue	FDR	IncLevelDifference
ENSG00000163584.13	RPL22L1	chr3	-	170585801	170585990	170585801	170585923	170586086	170586176	0	0	0.075
ENSG00000174516.10	PELI3	chr11	+	66243042	66244808	66243068	66244808	66241207	66241396	3.41128e-10	1.3669e-06	0.108
ENSG00000175110.7	MRPS22	chr3	+	139065719	139065886	139065722	139065886	139063406	139063560	1.87185e-09	5.00034e-06	0.109
ENSG00000011143.12	MKS1	chr17	-	56285465	56285611	56285465	56285535	56285873	56285944	3.23676e-08	6.48484e-05	0.063
ENSG00000123411.10	IKZF4	chr12	+	56413101	56413199	56413104	56413199	56411909	56411961	4.88802e-08	7.83452e-05	0.39
ENSG00000236830.2	CBR3-AS1	chr21	-	37518553	37519923	37518553	37518653	37520267	37523008	1.95697e-07	0.000196039	-0.174
ENSG00000159685.6	CHCHD6	chr3	+	126571486	126571573	126571489	126571573	126499182	126499273	1.9049e-07	0.000196039	0.288
ENSG00000076944.10	STXBP2	chr19	+	7705583	7705695	7705625	7705695	7704616	7704693	3.70195e-07	0.000290723	-0.158
ENSG00000126254.7	RBM42	chr19	+	36123999	36124154	36124002	36124154	36123837	36123903	3.99046e-07	0.000290723	-0.113
ENSG00000099957.12	P2RX6	chr22	+	21372209	21372349	21372277	21372349	21370230	21370381	3.983e-07	0.000290723	0.286
ENSG00000173402.7	DAG1	chr3	+	49524660	49524848	49524686	49524848	49514281	49514333	1.28094e-06	0.000727065	-0.21
ENSG00000151651.11	ADAM8	chr10	-	135086757	135086947	135086757	135086934	135087265	135087342	1.32028e-06	0.000727065	-0.207
ENSG00000116922.10	C1orf109	chr1	-	38148990	38149113	38148990	38149109	38151944	38152124	1.45159e-06	0.000727065	-0.126
ENSG00000167535.3	CACNB3	chr12	+	49220027	49220301	49220202	49220301	49219442	49219552	1.41703e-06	0.000727065	0.188
ENSG00000144524.13	COPS7B	chr2	+	232665849	232665917	232665864	232665917	232663568	232663674	1.59453e-06	0.000751678	-0.215
ENSG00000099977.9	DDT	chr22	-	24315292	24315536	24315292	24315532	24315956	24316132	2.05244e-06	0.000865699	0.205
ENSG00000186818.8	LILRB4	chr19	+	55178144	55178200	55178147	55178200	55177265	55177382	3.07353e-06	0.0011196	-0.404
ENSG00000082269.12	FAM135A	chr6	+	71186861	71187035	71186995	71187035	71185365	71185436	2.81369e-06	0.0011196	-0.072
ENSG00000104529.13	EEF1D	chr8	-	144668898	144669022	144668898	144669019	144676044	144676241	4.73629e-06	0.00165029	0.059
ENSG00000148824.14	MTG1	chr10	+	135215032	135215749	135215652	135215749	135212673	135212730	5.07649e-06	0.00169513	0.08
ENSG00000069329.11	VPS35	chr16	-	46716389	46716596	46716389	46716578	46717419	46717518	5.96291e-06	0.0018487	-0.361
ENSG00000178295.10	GEN1	chr2	+	17941178	17941371	17941195	17941371	17935124	17935234	5.99776e-06	0.0018487	-0.298
ENSG00000005801.12	ZNF195	chr11	-	3394806	3394905	3394806	3394886	3400267	3400369	7.58886e-06	0.00222155	0.069
ENSG00000106123.7	EPHB6	chr7	+	142563714	142564360	142564235	142564360	142563229	142563385	7.82585e-06	0.00222155	0.113
ENSG00000169855.15	ROBO1	chr3	-	78684922	78685258	78684922	78685093	78688893	78689048	1.91105e-05	0.00506078	-0.192
ENSG00000141314.8	RHBDL3	chr17	+	30621312	30621461	30621363	30621461	30615810	30616035	1.97159e-05	0.00506078	0.165
ENSG00000111674.4	ENO2	chr12	+	7024981	7025081	7024984	7025081	7023752	7023823	2.48625e-05	0.00603781	0.164
ENSG00000159208.11	C1orf51	chr1	+	150255617	150256043	150255871	150256043	150254952	150255028	2.92008e-05	0.00652462	-0.275
ENSG00000007341.14	ST7L	chr1	-	113159434	113159517	113159434	113159466	113161530	113161811	2.94049e-05	0.00652462	-0.076
ENSG00000157693.10	C9orf91	chr9	+	117389175	117389286	117389178	117389286	117386629	117386739	2.97121e-05	0.00652462	0.071
ENSG00000117407.12	ARTN	chr1	+	44401740	44402018	44401973	44402018	44401261	44401388	3.01236e-05	0.00652462	0.137
ENSG00000167613.11	LAIR1	chr19	-	54872522	54872816	54872522	54872813	54876377	54876414	3.4297e-05	0.00723307	-0.192
ENSG00000163864.10	NMNAT3	chr3	-	139346457	139346606	139346457	139346603	139356804	139356904	3.69231e-05	0.00739754	-0.163
ENSG00000105677.7	TMEM147	chr19	+	36037573	36038142	36038020	36038142	36036789	36036859	3.62335e-05	0.00739754	-0.096
ENSG00000167535.3	CACNB3	chr12	+	49220149	49220301	49220202	49220301	49219442	49219552	4.00211e-05	0.00782266	0.067
ENSG00000114867.15	EIF4G1	chr3	+	184033859	184034006	184033919	184034006	184033276	184033333	4.1612e-05	0.00793997	0.082
ENSG00000108848.11	LUC7L3	chr17	+	48826579	48826705	48826584	48826705	48825749	48825777	4.4734e-05	0.00833717	-0.205
ENSG00000005801.12	ZNF195	chr11	-	3394806	3394905	3394806	3394886	3398846	3399130	4.68602e-05	0.00853494	0.251
ENSG00000008283.11	CYB561	chr17	-	61514706	61514921	61514706	61514845	61523605	61523667	6.03027e-05	0.0105058	0.108
ENSG00000167522.10	ANKRD11	chr16	-	89383340	89383486	89383340	89383483	89497663	89497734	6.36146e-05	0.010847	-0.44
ENSG00000100109.12	TFIP11	chr22	-	26907084	26907161	26907084	26907119	26908064	26908141	6.94173e-05	0.0115898	0.206
ENSG00000130475.10	FCHO1	chr19	+	17865926	17866000	17865930	17866000	17865400	17865494	7.87357e-05	0.0128773	-0.297
ENSG00000158467.12	AHCYL2	chr7	+	129019478	129019590	129019481	129019590	129007981	129008392	8.38483e-05	0.0134392	-0.293
ENSG00000204622.6	HLA-J	chr6	+	29976814	29976954	29976921	29976954	29976361	29976478	8.79968e-05	0.0138276	-0.359
ENSG00000196150.9	ZNF250	chr8	-	146115317	146115459	146115317	146115444	146115692	146115788	9.88936e-05	0.0152071	0.14
ENSG00000117682.12	DHDDS	chr1	+	26795382	26797785	26795385	26797785	26784281	26784396	0.000108552	0.0157486	-0.384
ENSG00000163362.6	C1orf106	chr1	+	200867434	200867583	200867519	200867583	200860468	200860829	0.000110047	0.0157486	-0.054
ENSG00000148180.12	GSN	chr9	+	124062333	124062404	124062342	124062404	124043747	124043840	0.000113188	0.0159138	-0.192
ENSG00000161013.12	MGAT4B	chr5	-	179225927	179226175	179225927	179226121	179226505	179226636	0.000117635	0.015937	-0.133
ENSG00000197223.7	C1D	chr2	-	68274304	68274451	68274304	68274447	68290076	68290126	0.00013969	0.0180561	-0.053
ENSG00000117640.13	MTFR1L	chr1	+	26149730	26149930	26149836	26149930	26149509	26149619	0.000152283	0.0193714	-0.089
ENSG00000250571.2	GLI4	chr8	+	144356873	144356972	144356889	144356972	144351527	144351690	0.000157794	0.0197588	0.066
ENSG00000163349.17	HIPK1	chr1	+	114508751	114508894	114508754	114508894	114504938	114505060	0.000178672	0.0213713	0.106
ENSG00000026508.12	CD44	chr11	+	35227658	35227790	35227661	35227790	35226058	35226187	0.000197368	0.0222776	-0.146
ENSG00000146192.10	FGD2	chr6	+	36983543	36983636	36983575	36983636	36982667	36982814	0.000196825	0.0222776	-0.113
ENSG00000198468.3	FLVCR1-AS1	chr1	-	213029945	213030514	213029945	213030260	213031107	213031430	0.000214366	0.0235332	-0.052
ENSG00000168591.11	TMUB2	chr17	+	42264984	42265111	42265043	42265111	42264601	42264799	0.000243416	0.0260098	0.16
ENSG00000100109.12	TFIP11	chr22	-	26907084	26907283	26907084	26907119	26908064	26908141	0.000243019	0.0260098	0.297
ENSG00000168779.15	SHOX2	chr3	-	157822846	157822918	157822846	157822914	157823467	157823949	0.000248392	0.0261923	0.174
ENSG00000062524.11	LTK	chr15	-	41799292	41799855	41799292	41799488	41800266	41800419	0.000254249	0.0264617	-0.073
ENSG00000079134.7	THOC1	chr18	-	224083	224200	224083	224179	224923	224994	0.000274447	0.0281977	-0.051
ENSG00000009830.7	POMT2	chr14	-	77745071	77745304	77745071	77745212	77746165	77746271	0.000291204	0.0291032	-0.078
ENSG00000154222.10	CC2D1B	chr1	-	52823452	52823588	52823452	52823570	52824002	52824133	0.000294155	0.0291032	0.081
ENSG00000143951.11	WDPCP	chr2	-	63666890	63667005	63666890	63666989	63711737	63711797	0.000326893	0.0315629	0.076
ENSG00000162572.15	SCNN1D	chr1	+	1217621	1217695	1217655	1217695	1215851	1216046	0.000340125	0.0319507	-0.468
ENSG00000109917.6	ZNF259	chr11	-	116655093	116655214	116655093	116655164	116655574	116655637	0.000348351	0.0319507	-0.062
ENSG00000068137.10	PLEKHH3	chr17	-	40824103	40824410	40824103	40824230	40825193	40825314	0.000344848	0.0319507	0.087
ENSG00000170271.6	FAXDC2	chr5	-	154214402	154214679	154214402	154214494	154217690	154217738	0.000353584	0.0319507	0.09
ENSG00000055483.15	USP36	chr17	-	76791734	76793984	76791734	76793961	76794481	76794633	0.00035483	0.0319507	0.092
ENSG00000176884.10	GRIN1	chr9	+	140061862	140063207	140062225	140063207	140058210	140058356	0.000391914	0.0329795	-0.213
ENSG00000108599.10	AKAP10	chr17	-	19866152	19866304	19866152	19866279	19871726	19871774	0.00038649	0.0329795	-0.052
ENSG00000062822.8	POLD1	chr19	+	50902104	50902310	50902107	50902310	50898281	50898407	0.000395063	0.0329795	0.085
ENSG00000050438.12	SLC4A8	chr12	+	51844425	51844806	51844659	51844806	51834491	51834573	0.000390295	0.0329795	0.145
ENSG00000163633.6	C4orf36	chr4	-	87811200	87811311	87811200	87811291	87812608	87812746	0.000387181	0.0329795	0.274
ENSG00000160410.10	SHKBP1	chr19	+	41084002	41084118	41084028	41084118	41083462	41083536	0.000413857	0.0336875	-0.352
ENSG00000172493.16	AFF1	chr4	+	88055622	88055846	88055625	88055846	88052944	88053016	0.000407932	0.0336875	-0.16
ENSG00000114923.12	SLC4A3	chr2	+	220498576	220498701	220498601	220498701	220497995	220498179	0.000416155	0.0336875	0.19
ENSG00000132128.12	LRRC41	chr1	-	46744853	46745286	46744853	46744929	46746796	46747057	0.000445001	0.0344463	-0.066
ENSG00000153885.10	KCTD15	chr19	+	34289572	34289671	34289575	34289671	34286837	34287008	0.000485532	0.0356977	0.238
ENSG00000150455.9	TIRAP	chr11	+	126161167	126161464	126161319	126161464	126160697	126160856	0.000500119	0.0361077	-0.328
ENSG00000197971.10	MBP	chr18	-	74700832	74700898	74700832	74700868	74701911	74702016	0.000510758	0.0365466	0.324
ENSG00000173402.7	DAG1	chr3	+	49526058	49526178	49526130	49526178	49524686	49524848	0.000520924	0.0369441	-0.113
ENSG00000185499.12	MUC1	chr1	-	155160638	155160761	155160638	155160707	155161973	155162074	0.000544199	0.0378322	0.313
ENSG00000114388.8	NPRL2	chr3	-	50387095	50387264	50387095	50387259	50387343	50387453	0.000602109	0.0408924	-0.124
ENSG00000109065.7	NAT9	chr17	-	72770004	72770194	72770004	72770078	72771760	72771846	0.000619236	0.0417021	-0.079
ENSG00000248751.2	RP1-130H16.18	chr22	-	30682813	30682940	30682813	30682937	30683143	30683276	0.000629958	0.041723	0.113
ENSG00000079308.12	TNS1	chr2	-	218677937	218678030	218677937	218678027	218678407	218678539	0.000638079	0.0418261	-0.072
ENSG00000142530.6	FAM71E1	chr19	-	50978581	50978760	50978581	50978712	50979089	50979190	0.000684734	0.0435147	-0.541
ENSG00000015153.10	YAF2	chr12	-	42604349	42604482	42604349	42604421	42629415	42629557	0.000755554	0.0462215	0.104
ENSG00000088727.8	KIF9	chr3	-	47289507	47289693	47289507	47289576	47298972	47299050	0.000794163	0.0474957	0.096
ENSG00000160117.10	ANKLE1	chr19	+	17392865	17393018	17392870	17393018	17392685	17392758	0.00078261	0.0474957	0.197
ENSG00000179532.8	DNHD1	chr11	+	6566021	6568896	6566106	6568896	6565803	6565901	0.000813056	0.0475608	-0.077
ENSG00000185787.10	MORF4L1	chr15	+	79177308	79177425	79177311	79177425	79172853	79172921	0.000812012	0.0475608	0.096
ENSG00000127980.11	PEX1	chr7	-	92130820	92131393	92130820	92130987	92132354	92132509	0.000821796	0.0477237	-0.18
ENSG00000144283.17	PKP4	chr2	+	159481466	159481939	159481636	159481939	159477742	159477933	0.00083376	0.047994	-0.052
ENSG00000167733.9	HSD11B1L	chr19	+	5684999	5685130	5685003	5685130	5684829	5684916	0.000854439	0.0485637	-0.285
ENSG00000213930.7	GALT	chr9	+	34648044	34648168	34648088	34648168	34647828	34647958	0.00086939	0.0486855	-0.303
ENSG00000137185.7	ZSCAN9	chr6	+	28198113	28198266	28198179	28198266	28195467	28195615	0.000874808	0.0486855	0.16
ENSG00000150433.5	TMEM218	chr11	-	124972027	124972247	124972027	124972213	124972532	124972705	0.000903085	0.0496926	-0.174
ENSG00000197586.8	ENTPD6	chr20	+	25187711	25188033	25187714	25188033	25187157	25187226	0.000905305	0.0496926	0.148

## Sheet: DMSO L22KO vs NT A5SS
GeneID	geneSymbol	chr	strand	longExonStart_0base	longExonEnd	shortES	shortEE	flankingES	flankingEE	PValue	FDR	IncLevelDifference
ENSG00000165801.5	ARHGEF40	chr14	+	21541203	21541401	21541203	21541337	21542090	21543339	2.51589e-07	0.000668974	-0.102
ENSG00000237940.3	AC093642.3	chr2	+	242913525	242913644	242913525	242913613	242913835	242913926	1.0564e-06	0.00112359	-0.414
ENSG00000099250.13	NRP1	chr10	-	33491818	33491923	33491839	33491923	33486577	33486637	9.15511e-07	0.00112359	-0.129
ENSG00000182718.12	ANXA2	chr15	-	60688349	60688626	60688478	60688626	60678226	60678285	9.4222e-07	0.00112359	0.16
ENSG00000179818.9	PCBP1-AS1	chr2	-	70282787	70283042	70282845	70283042	70278334	70278437	2.75329e-06	0.00172646	-0.348
ENSG00000111237.14	VPS29	chr12	-	110937261	110937351	110937339	110937351	110934627	110934807	3.29432e-06	0.00172646	-0.129
ENSG00000239665.4	RP11-295P9.3	chr10	+	13686916	13687136	13686916	13687074	13696352	13697482	2.53439e-06	0.00172646	0.156
ENSG00000204310.6	AGPAT1	chr6	-	32139026	32139282	32139073	32139282	32138201	32138377	3.57109e-06	0.00172646	0.29
ENSG00000030582.12	GRN	chr17	+	42422669	42422973	42422669	42422702	42423456	42423596	5.77672e-06	0.00236312	-0.512
ENSG00000188917.10	TRMT2B	chrX	-	100306239	100306722	100306632	100306722	100297030	100297301	1.0735e-05	0.00380592	-0.134
ENSG00000250155.1	CTD-2353F22.1	chr5	-	36705781	36705953	36705822	36705953	36668666	36668813	1.02526e-05	0.00380592	-0.132
ENSG00000197971.10	MBP	chr18	-	74700255	74700483	74700450	74700483	74696730	74696850	1.19141e-05	0.00395994	-0.28
ENSG00000181396.8	OGFOD3	chr17	-	80373273	80373503	80373281	80373503	80369330	80369406	1.41038e-05	0.00441201	0.065
ENSG00000165795.16	NDRG2	chr14	-	21492144	21492255	21492188	21492255	21491399	21491480	1.81372e-05	0.0050765	0.152
ENSG00000126456.11	IRF3	chr19	-	50167699	50167930	50167809	50167930	50166444	50166515	2.71125e-05	0.00682502	-0.404
ENSG00000185920.11	PTCH1	chr9	-	98212122	98215902	98215759	98215902	98211350	98211605	2.73575e-05	0.00682502	-0.098
ENSG00000082397.11	EPB41L3	chr18	-	5406763	5406967	5406775	5406967	5400967	5401042	2.82344e-05	0.00682502	0.178
ENSG00000197111.11	PCBP2	chr12	+	53854114	53854470	53854114	53854209	53854798	53854927	3.0131e-05	0.00696681	-0.076
ENSG00000065357.15	DGKA	chr12	+	56331191	56331341	56331191	56331327	56331761	56331836	4.4314e-05	0.00981925	-0.065
ENSG00000157353.12	FUK	chr16	+	70500784	70501374	70500784	70500857	70502751	70502871	4.96698e-05	0.0101594	-0.209
ENSG00000113971.14	NPHP3	chr3	-	132403397	132405231	132405103	132405231	132402242	132402368	4.8209e-05	0.0101594	-0.108
ENSG00000179532.8	DNHD1	chr11	+	6584211	6584485	6584211	6584361	6584611	6584794	6.64233e-05	0.0119799	-0.313
ENSG00000118557.11	PMFBP1	chr16	-	72166631	72166890	72166646	72166890	72164431	72164621	6.39541e-05	0.0119799	-0.111
ENSG00000058673.11	ZC3H11A	chr1	+	203764781	203764922	203764781	203764903	203786053	203786252	6.20486e-05	0.0119799	0.113
ENSG00000172716.12	SLFN11	chr17	-	33694559	33694719	33694621	33694719	33693965	33694062	6.75814e-05	0.0119799	0.28
ENSG00000165410.10	CFL2	chr14	-	35182459	35182767	35182713	35182767	35182265	35182342	7.3064e-05	0.012534	0.122
ENSG00000141560.10	FN3KRP	chr17	+	80678636	80678841	80678636	80678717	80680679	80680762	7.88678e-05	0.0130242	-0.323
ENSG00000272578.1	AP000347.2	chr22	-	24029017	24029182	24029024	24029182	24002062	24002187	8.20852e-05	0.0130242	-0.305
ENSG00000162910.14	MRPL55	chr1	-	228296849	228297000	228296961	228297000	228295368	228295570	0.000119565	0.017185	-0.128
ENSG00000167646.9	DNAAF3	chr19	-	55677149	55677368	55677225	55677368	55676737	55676831	0.000144837	0.0197498	0.189
ENSG00000139160.9	METTL20	chr12	+	31812621	31813003	31812621	31812723	31814774	31815201	0.000150684	0.0200334	0.414
ENSG00000165480.11	SKA3	chr13	-	21750486	21750690	21750513	21750690	21729831	21729950	0.000172511	0.0213352	-0.22
ENSG00000170037.9	CNTROB	chr17	+	7851804	7852003	7851804	7851937	7852399	7852475	0.000170169	0.0213352	-0.055
ENSG00000205309.9	NT5M	chr17	+	17207677	17207795	17207677	17207791	17209856	17209957	0.000185994	0.0219803	0.14
ENSG00000167272.6	POP5	chr12	-	121018798	121019060	121018917	121019060	121017316	121017400	0.000197335	0.0228136	-0.143
ENSG00000189308.6	LIN54	chr4	-	83905313	83906029	83905976	83906029	83867410	83867627	0.000215352	0.0243668	-0.055
ENSG00000115677.12	HDLBP	chr2	-	242208615	242208710	242208620	242208710	242207891	242207956	0.000226876	0.024623	-0.155
ENSG00000084764.6	MAPRE3	chr2	+	27246963	27247165	27246963	27247120	27248450	27248605	0.000223605	0.024623	-0.109
ENSG00000104907.8	TRMT1	chr19	-	13226919	13227245	13226959	13227245	13226439	13226582	0.000237818	0.0249024	-0.101
ENSG00000198093.6	ZNF649	chr19	-	52403050	52403547	52403345	52403547	52400104	52400231	0.000238816	0.0249024	0.063
ENSG00000198208.7	RPS6KL1	chr14	-	75375803	75376851	75376245	75376851	75375552	75375635	0.000292107	0.0262192	-0.15
ENSG00000165801.5	ARHGEF40	chr14	+	21543490	21543924	21543490	21543658	21544518	21544615	0.000297644	0.0262192	-0.121
ENSG00000100445.12	SDR39U1	chr14	-	24911303	24911466	24911314	24911466	24909988	24910132	0.000290855	0.0262192	-0.11
ENSG00000104164.6	BLOC1S6	chr15	+	45890077	45890194	45890077	45890089	45893431	45893605	0.000300747	0.0262192	-0.108
ENSG00000181404.13	XXyac-YRM2039.2	chr9	-	16964	17166	16968	17166	16717	16876	0.00026683	0.0262192	-0.068
ENSG00000105223.14	PLD3	chr19	+	40871459	40871837	40871459	40871492	40872325	40872417	0.000279442	0.0262192	0.076
ENSG00000127564.12	PKMYT1	chr16	-	3029808	3029913	3029816	3029913	3026664	3027032	0.000289174	0.0262192	0.085
ENSG00000163389.6	POGLUT1	chr3	+	119205679	119205883	119205679	119205779	119207775	119207834	0.000307552	0.02638	0.056
ENSG00000144535.15	DIS3L2	chr2	+	233001181	233001433	233001181	233001429	233028172	233028230	0.000335253	0.0274288	-0.293
ENSG00000010361.9	FUZ	chr19	-	50315871	50315993	50315894	50315993	50314887	50314956	0.000325337	0.0274288	-0.097
ENSG00000131844.11	MCCC2	chr5	+	70936829	70936910	70936829	70936902	70939597	70939722	0.000364624	0.0293799	0.148
ENSG00000173402.7	DAG1	chr3	+	49507564	49508006	49507564	49507866	49547851	49548252	0.000402579	0.0298292	-0.061
ENSG00000087263.12	OGFOD1	chr16	+	56485432	56485672	56485432	56485479	56487174	56487320	0.000393108	0.0298292	0.076
ENSG00000120334.11	CENPL	chr1	-	173775576	173775714	173775596	173775714	173772100	173772643	0.000399016	0.0298292	0.129
ENSG00000118263.10	KLF7	chr2	-	207988699	207989128	207989067	207989128	207953181	207953305	0.000415384	0.0302456	-0.087
ENSG00000102103.11	PQBP1	chrX	+	48755194	48755376	48755194	48755365	48758466	48758578	0.000436179	0.0302456	0.234
ENSG00000140368.8	PSTPIP1	chr15	+	77324638	77324769	77324638	77324735	77325202	77325293	0.000471226	0.0313247	0.094
ENSG00000214063.6	TSPAN4	chr11	+	862549	864352	862549	862741	864436	864511	0.000532074	0.0343996	0.171
ENSG00000177058.7	SLC38A9	chr5	-	55007179	55007327	55007279	55007327	54998566	54998722	0.000557369	0.0344661	-0.16
ENSG00000141380.9	SS18	chr18	-	23670967	23671156	23671059	23671156	23667464	23667541	0.000556644	0.0344661	0.199
ENSG00000104957.9	CCDC130	chr19	+	13842573	13842764	13842573	13842745	13842988	13843099	0.000591093	0.0361314	-0.148
ENSG00000196378.7	ZNF34	chr8	-	146005612	146005665	146005616	146005665	146003823	146003910	0.00061365	0.036777	-0.098
ENSG00000137497.13	NUMA1	chr11	-	71779124	71779277	71779150	71779277	71746947	71747021	0.000615486	0.036777	0.197
ENSG00000129757.8	CDKN1C	chr11	-	2905899	2906696	2906431	2906696	2905228	2905364	0.000658851	0.038503	-0.304
ENSG00000179818.9	PCBP1-AS1	chr2	-	70310638	70310819	70310669	70310819	70304432	70304513	0.000735881	0.0396992	-0.283
ENSG00000127328.17	RAB3IP	chr12	+	70193988	70194117	70193988	70194112	70195388	70195501	0.000723767	0.0396992	-0.083
ENSG00000105854.8	PON2	chr7	-	95045483	95045609	95045553	95045609	95041623	95041789	0.000737092	0.0396992	0.104
ENSG00000261556.4	RP11-296I10.6	chr16	-	70265225	70265426	70265339	70265426	70264896	70265061	0.000739042	0.0396992	0.191
ENSG00000167524.10	SGK494	chr17	-	26938561	26938674	26938584	26938674	26938160	26938271	0.000731049	0.0396992	0.194
ENSG00000143436.6	MRPL9	chr1	-	151735425	151735622	151735430	151735622	151734851	151734976	0.000714996	0.0396992	0.283
ENSG00000155465.14	SLC7A7	chr14	-	23284522	23284660	23284528	23284660	23282108	23282649	0.000782673	0.0416225	0.165
ENSG00000143851.11	PTPN7	chr1	-	202129672	202130709	202130514	202130709	202128408	202128578	0.000816842	0.0430095	0.134
ENSG00000214021.11	TTLL3	chr3	+	9868680	9868924	9868680	9868756	9870643	9871079	0.000833354	0.0434488	-0.068
ENSG00000132376.15	INPP5K	chr17	-	1418720	1418879	1418862	1418879	1417165	1417273	0.000878154	0.0449041	-0.187
ENSG00000176728.3	TTTY14	chrY	-	21206427	21206581	21206547	21206581	21205048	21205232	0.000893431	0.0452502	-0.065
ENSG00000166348.13	USP54	chr10	-	75265065	75265184	75265080	75265184	75260412	75260596	0.000942092	0.0472646	0.061
ENSG00000261008.2	AC004158.2	chr16	-	72604333	72604414	72604349	72604414	72574476	72574510	0.000991541	0.0488242	0.329

## Sheet: DMSO L22KO vs NT SE
GeneID	geneSymbol	chr	strand	exonStart_0base	exonEnd	upstreamES	upstreamEE	downstreamES	downstreamEE	PValue	FDR	IncLevelDifference
ENSG00000198625.8	MDM4	chr1	+	204506557	204506625	204501318	204501374	204507336	204507436	0	0	-0.144
ENSG00000116251.5	RPL22	chr1	-	6252989	6253114	6245079	6246876	6257711	6257816	0	0	0.258
ENSG00000154611.10	PSMA8	chr18	+	23720008	23720073	23713815	23714031	23731821	23731946	7.95253e-13	2.91961e-08	0.694
ENSG00000237298.4	TTN-AS1	chr2	+	179447298	179447433	179388178	179388363	179448439	179448648	1.69953e-12	4.67961e-08	-0.617
ENSG00000065154.7	OAT	chr10	-	126102914	126103001	126100541	126100769	126103521	126103641	2.8586e-12	6.29687e-08	-0.592
ENSG00000215424.5	MCM3AP-AS1	chr21	+	47656137	47656240	47650240	47650441	47660750	47662913	1.06911e-11	1.68216e-07	-0.484
ENSG00000148985.15	PGAP2	chr11	+	3844138	3844223	3832479	3832654	3844842	3844970	4.38173e-11	6.03249e-07	0.494
ENSG00000189057.6	FAM111B	chr11	+	58877012	58877179	58876140	58876185	58891651	58894867	1.87498e-10	2.29453e-06	0.255
ENSG00000125354.18	SEPT6	chrX	-	118774654	118774751	118767322	118767455	118786816	118787003	2.15642e-10	2.37506e-06	-0.366
ENSG00000160570.9	DEDD2	chr19	-	42720831	42721197	42719284	42719404	42724225	42724275	3.74875e-10	3.75348e-06	0.138
ENSG00000099622.9	CIRBP	chr19	+	1264251	1264462	1261380	1261640	1270926	1271028	4.43423e-10	3.75678e-06	-0.428
ENSG00000015479.13	MATR3	chr5	+	138614739	138614818	138611809	138611839	138642927	138644016	4.21957e-10	3.75678e-06	0.151
ENSG00000104164.6	BLOC1S6	chr15	+	45890077	45890089	45879549	45879723	45893431	45893605	9.14092e-10	6.71181e-06	0.579
ENSG00000111237.14	VPS29	chr12	-	110936624	110936664	110934627	110934807	110937339	110937351	9.75938e-10	6.71805e-06	-0.685
ENSG00000115761.11	NOL10	chr2	-	10794606	10794673	10747310	10747437	10799297	10799376	1.06815e-09	6.92028e-06	0.564
ENSG00000007341.14	ST7L	chr1	-	113159434	113159466	113153462	113153625	113161530	113161749	1.17497e-09	7.18945e-06	0.243
ENSG00000112078.9	KCTD20	chr6	+	36442565	36442839	36437828	36438034	36446897	36447000	1.38527e-09	8.03011e-06	0.066
ENSG00000122033.10	MTIF3	chr13	-	28019224	28019274	28009779	28010030	28024645	28024724	1.7261e-09	9.50557e-06	-0.711
ENSG00000015479.13	MATR3	chr5	+	138629141	138629264	138611809	138611839	138642927	138644016	1.95542e-09	1.02556e-05	0.409
ENSG00000124155.12	PIGT	chr20	+	44048143	44048230	44044780	44044983	44048971	44049069	2.11913e-09	1.0609e-05	-0.533
ENSG00000242588.2	RP11-274B21.1	chr7	+	128214773	128214845	128173698	128173784	128220052	128220148	3.39181e-09	1.62422e-05	-0.116
ENSG00000188917.10	TRMT2B	chrX	-	100296305	100296360	100290601	100290672	100306772	100307071	3.84863e-09	1.65135e-05	-0.591
ENSG00000062524.11	LTK	chr15	-	41803361	41803544	41801228	41801327	41803619	41803776	3.6979e-09	1.65135e-05	-0.574
ENSG00000186132.10	C2orf76	chr2	-	120097734	120097937	120097402	120097547	120123932	120124258	3.89828e-09	1.65135e-05	0.454
ENSG00000111271.10	ACAD10	chr12	+	112128255	112128357	112125861	112126022	112130500	112130553	4.27001e-09	1.74183e-05	0.625
ENSG00000135549.10	PKIB	chr6	+	122906637	122906698	122803291	122803411	122907065	122907269	5.27922e-09	2.0766e-05	-0.693
ENSG00000141522.7	ARHGDIA	chr17	-	79827048	79827112	79825772	79826819	79827417	79827501	5.58621e-09	2.12159e-05	-0.461
ENSG00000198625.8	MDM4	chr1	+	204506586	204506625	204501318	204501374	204507336	204507436	6.3898e-09	2.34589e-05	-0.244
ENSG00000160953.10	MUM1	chr19	+	1366303	1366380	1362248	1362350	1369263	1369339	8.79249e-09	3.12386e-05	0.635
ENSG00000186141.4	POLR3C	chr1	-	145596903	145597054	145592616	145592771	145598535	145598573	9.84145e-09	3.33264e-05	-0.157
ENSG00000022976.11	ZNF839	chr14	+	102802971	102803056	102802025	102802175	102805152	102805290	9.99605e-09	3.33264e-05	0.078
ENSG00000154611.10	PSMA8	chr18	+	23724522	23724535	23713837	23714031	23731821	23731946	1.02879e-08	3.33264e-05	0.412
ENSG00000113558.14	SKP1	chr5	-	133506641	133506729	133502860	133502934	133509391	133509457	1.10945e-08	3.3555e-05	-0.615
ENSG00000112787.8	FBRSL1	chr12	+	133147892	133148110	133146511	133146827	133148873	133148930	1.12184e-08	3.3555e-05	-0.058
ENSG00000179335.14	CLK3	chr15	+	74914834	74914901	74912349	74912566	74917242	74917359	1.12724e-08	3.3555e-05	-0.051
ENSG00000162616.8	DNAJB4	chr1	+	78458437	78458550	78444964	78445303	78478734	78479198	1.2923e-08	3.38888e-05	-0.56
ENSG00000141522.7	ARHGDIA	chr17	-	79826931	79826951	79826506	79826819	79827417	79827501	1.25088e-08	3.38888e-05	-0.503
ENSG00000101306.6	MYLK2	chr20	+	30418815	30418944	30418621	30418692	30419505	30419658	1.24004e-08	3.38888e-05	-0.468
ENSG00000166801.11	FAM111A	chr11	+	58913299	58913329	58910555	58910777	58919222	58919691	1.27827e-08	3.38888e-05	0.213
ENSG00000188976.6	NOC2L	chr1	-	881781	881925	880897	881033	883869	883983	1.18081e-08	3.38888e-05	0.34
ENSG00000091592.11	NLRP1	chr17	-	5437216	5437308	5436141	5436304	5440170	5440260	1.68646e-08	4.29932e-05	-0.185
ENSG00000051382.4	PIK3CB	chr3	-	138409841	138409985	138403466	138403645	138417748	138417937	1.71756e-08	4.29932e-05	0.252
ENSG00000155744.5	FAM126B	chr2	-	201926029	201926147	201888681	201888762	201936332	201936394	1.91325e-08	4.68274e-05	0.536
ENSG00000170638.5	TRABD	chr22	+	50635669	50635780	50632768	50632935	50636503	50636615	1.96744e-08	4.7107e-05	0.556
ENSG00000196296.9	ATP2A1	chr16	+	28903635	28903980	28900217	28900274	28905475	28905540	2.69512e-08	6.31569e-05	-0.561
ENSG00000139324.7	TMTC3	chr12	+	88547067	88547286	88542064	88542281	88548064	88548101	2.77243e-08	6.36152e-05	-0.096
ENSG00000242588.2	RP11-274B21.1	chr7	+	128218943	128218987	128173698	128173784	128220052	128220148	3.04769e-08	6.7134e-05	-0.09
ENSG00000110328.5	GALNT18	chr11	-	11362365	11362551	11354240	11354378	11394061	11394176	3.01064e-08	6.7134e-05	0.206
ENSG00000166839.12	ANKDD1A	chr15	+	65218264	65218369	65214119	65214218	65223019	65223118	3.71585e-08	8.0247e-05	-0.451
ENSG00000143248.8	RGS5	chr1	-	163278333	163278421	163276022	163276119	163291411	163291577	4.04796e-08	8.57382e-05	0.221
ENSG00000100888.8	CHD8	chr14	-	21905059	21905124	21899896	21900017	21905352	21905389	4.26548e-08	8.86407e-05	0.246
ENSG00000109756.4	RAPGEF2	chr4	+	160164925	160164943	160162352	160162520	160225493	160225625	4.48386e-08	9.14534e-05	-0.182
ENSG00000111271.10	ACAD10	chr12	+	112128862	112128972	112125861	112126022	112130500	112130553	4.67799e-08	9.36781e-05	0.644
ENSG00000132128.12	LRRC41	chr1	-	46745863	46745962	46744853	46744929	46746796	46746833	5.35338e-08	0.000105289	-0.315
ENSG00000130844.12	ZNF331	chr19	+	54042469	54042536	54025870	54025938	54072557	54072639	5.59833e-08	0.000108174	-0.307
ENSG00000267278.1	MAP3K14-AS1	chr17	+	43332501	43332585	43325291	43325370	43344479	43344695	5.79119e-08	0.000109972	0.339
ENSG00000072210.14	ALDH3A2	chr17	+	19576463	19576588	19575033	19575269	19578874	19579838	6.43305e-08	0.00012009	-0.286
ENSG00000253203.2	GUSBP3	chr5	-	68941708	68941896	68938031	68938116	68974971	68975020	6.61758e-08	0.000121476	-0.121
ENSG00000053918.11	KCNQ1	chr11	+	2798215	2798262	2797189	2797284	2799205	2799267	7.48521e-08	0.000128815	-0.101
ENSG00000154611.10	PSMA8	chr18	+	23724522	23724649	23713815	23714031	23731821	23731946	7.41794e-08	0.000128815	0.058
ENSG00000007341.14	ST7L	chr1	-	113159434	113159517	113153080	113153625	113161530	113161563	7.38474e-08	0.000128815	0.081
ENSG00000154358.15	OBSCN	chr1	+	228491375	228491639	228486154	228486418	228494072	228494339	7.2446e-08	0.000128815	0.54
ENSG00000163463.7	KRTCAP2	chr1	-	155145040	155145104	155141883	155142036	155145792	155145951	7.94016e-08	0.000134542	-0.264
ENSG00000134490.9	TMEM241	chr18	-	20948678	20948714	20936557	20936627	20951385	20951434	9.44963e-08	0.000153055	0.556
ENSG00000167904.10	TMEM68	chr8	-	56657619	56657680	56656039	56656179	56663522	56663716	9.84653e-08	0.000154927	-0.055
ENSG00000104450.8	SPAG1	chr8	+	101226046	101226146	101225317	101225656	101237400	101237567	9.72977e-08	0.000154927	0.218
ENSG00000136280.11	CCM2	chr7	+	45108041	45108178	45039783	45039962	45113058	45113170	1.02479e-07	0.000158972	-0.222
ENSG00000213160.5	KLHL23	chr2	+	170591522	170592737	170553870	170554041	170597894	170598047	1.05664e-07	0.000161635	0.23
ENSG00000122224.13	LY9	chr1	+	160793970	160794042	160793254	160793586	160797537	160798039	1.43515e-07	0.000216529	-0.244
ENSG00000154358.15	OBSCN	chr1	+	228487582	228487846	228486154	228486418	228491375	228491639	1.47522e-07	0.000219566	-0.455
ENSG00000124588.15	NQO2	chr6	+	3004728	3004885	3003902	3004023	3006701	3006793	1.56218e-07	0.000229409	0.306
ENSG00000267278.1	MAP3K14-AS1	chr17	+	43332504	43332585	43325320	43325370	43344479	43344695	1.61961e-07	0.000234714	0.388
ENSG00000196357.7	ZNF565	chr19	-	36692878	36692952	36685728	36686058	36705523	36705565	1.73292e-07	0.000247873	-0.127
ENSG00000104714.9	ERICH1	chr8	-	575674	577238	564745	565284	618597	618792	1.89621e-07	0.000267752	-0.265
ENSG00000226674.4	TEX41	chr2	+	145429168	145429231	145425578	145425675	145525664	145525847	1.97763e-07	0.000275715	-0.308
ENSG00000091592.11	NLRP1	chr17	-	5436623	5436704	5436141	5436304	5440170	5440260	2.02024e-07	0.000278134	-0.292
ENSG00000154358.15	OBSCN	chr1	+	228486959	228487223	228486154	228486418	228494072	228494339	2.13367e-07	0.000290123	0.541
ENSG00000010270.9	STARD3NL	chr7	+	38218691	38218747	38217952	38218022	38253957	38254035	2.35963e-07	0.000316936	-0.379
ENSG00000101294.12	HM13	chr20	+	30136831	30136917	30125981	30126064	30137866	30137924	2.40282e-07	0.000318848	0.248
ENSG00000179889.14	PDXDC1	chr16	+	15078375	15078515	15068674	15068830	15091609	15091683	2.47722e-07	0.000324807	0.192
ENSG00000188917.10	TRMT2B	chrX	-	100292905	100293040	100290601	100290672	100306772	100307071	2.74435e-07	0.000352314	-0.372
ENSG00000105948.9	TTC26	chr7	+	138832951	138833123	138827001	138827051	138849877	138849980	2.81495e-07	0.000352314	-0.249
ENSG00000005812.6	FBXL3	chr13	-	77595647	77595996	77592734	77592857	77600961	77601285	2.75184e-07	0.000352314	-0.106
ENSG00000118557.11	PMFBP1	chr16	-	72164111	72164256	72162964	72163132	72164431	72164621	2.79396e-07	0.000352314	0.158
ENSG00000128596.12	CCDC136	chr7	+	128449503	128449698	128447413	128447599	128450192	128450420	2.94567e-07	0.000360481	-0.354
ENSG00000131791.6	PRKAB2	chr1	-	146638424	146638518	146634018	146634152	146643567	146643746	2.9224e-07	0.000360481	0.3
ENSG00000158806.9	NPM2	chr8	+	21883157	21883283	21882946	21883032	21890640	21890667	3.07169e-07	0.000371772	-0.13
ENSG00000087299.7	L2HGDH	chr14	-	50778008	50778151	50769619	50769735	50778728	50778865	3.25968e-07	0.000390237	-0.069
ENSG00000058056.4	USP13	chr3	+	179408028	179408089	179399665	179399791	179424721	179424864	3.35889e-07	0.00039779	0.136
ENSG00000089486.12	CDIP1	chr16	-	4586440	4586769	4564575	4564665	4588325	4588405	3.63117e-07	0.000425461	0.28
ENSG00000178188.10	SH2B1	chr16	+	28877332	28878354	28874988	28875075	28878694	28878753	4.06311e-07	0.000465566	0.057
ENSG00000182718.12	ANXA2	chr15	-	60686772	60686894	60678226	60678285	60688478	60688626	4.13078e-07	0.000465566	0.673
ENSG00000148985.15	PGAP2	chr11	+	3844842	3844970	3832479	3832654	3845499	3845573	4.71625e-07	0.000504314	-0.438
ENSG00000174238.10	PITPNA	chr17	-	1446313	1446321	1442162	1442246	1451589	1451681	4.68044e-07	0.000504314	-0.115
ENSG00000166801.11	FAM111A	chr11	+	58910969	58913329	58910555	58910777	58919222	58922512	4.71059e-07	0.000504314	0.068
ENSG00000055208.13	TAB2	chr6	+	149663820	149663969	149639717	149639918	149691044	149691211	4.70379e-07	0.000504314	0.174
ENSG00000239665.4	RP11-295P9.3	chr10	+	13690084	13690230	13686575	13687074	13696352	13696427	5.21973e-07	0.000552785	0.298
ENSG00000138674.12	SEC31A	chr4	-	83801951	83802075	83796879	83796975	83812240	83812331	5.30764e-07	0.000553898	-0.155
ENSG00000122224.13	LY9	chr1	+	160793970	160794039	160793254	160793586	160797537	160798039	5.4314e-07	0.000553898	-0.152
ENSG00000101901.6	ALG13	chrX	+	110952192	110952276	110928192	110928331	110954902	110954953	5.33952e-07	0.000553898	-0.123
ENSG00000106123.7	EPHB6	chr7	+	142563714	142564071	142563229	142563385	142564235	142564360	5.39421e-07	0.000553898	0.071
ENSG00000100031.14	GGT1	chr22	+	25003920	25003990	24999113	24999494	25006324	25006498	5.61855e-07	0.000567726	-0.139
ENSG00000101901.6	ALG13	chrX	+	110951254	110951621	110928192	110928331	110954902	110954953	6.01559e-07	0.000602319	-0.123
ENSG00000130844.12	ZNF331	chr19	+	54059098	54059162	54025870	54025938	54072557	54072639	6.2293e-07	0.000618098	-0.165
ENSG00000159063.8	ALG8	chr11	-	77823695	77823816	77815401	77815499	77830227	77830295	6.36801e-07	0.00062622	-0.325
ENSG00000163072.10	NOSTRIN	chr2	+	169712395	169712720	169711931	169711970	169713199	169713288	6.92705e-07	0.000669244	0.303
ENSG00000155100.6	OTUD6B	chr8	+	92088819	92088959	92083365	92083517	92090583	92090896	7.03544e-07	0.000673806	0.194
ENSG00000100479.8	POLE2	chr14	-	50141067	50141145	50140840	50140934	50146442	50146518	7.71004e-07	0.000732048	-0.076
ENSG00000213906.5	LTB4R2	chr14	+	24779376	24779461	24774939	24775073	24779860	24780351	7.85409e-07	0.000739352	-0.236
ENSG00000176715.11	ACSF3	chr16	+	89164998	89165171	89160216	89160400	89169011	89169167	8.08821e-07	0.000754939	-0.125
ENSG00000105948.9	TTC26	chr7	+	138832951	138833123	138827001	138827051	138845693	138845768	8.16748e-07	0.000755931	-0.176
ENSG00000179818.9	PCBP1-AS1	chr2	-	70280862	70280924	70278176	70278437	70282845	70282955	8.71733e-07	0.000791982	-0.252
ENSG00000132359.9	RAP1GAP2	chr17	+	2908634	2908734	2901514	2901670	2909248	2909335	8.84462e-07	0.000791982	-0.167
ENSG00000183354.7	KIAA2026	chr9	-	5944870	5944960	5933750	5933881	5954015	5954095	8.78094e-07	0.000791982	-0.078
ENSG00000111877.13	MCM9	chr6	-	119177533	119177708	119150210	119150413	119215190	119215520	9.12438e-07	0.000810443	-0.11
ENSG00000155366.12	RHOC	chr1	-	113247721	113247790	113246114	113246428	113249699	113249736	9.4183e-07	0.000823168	-0.263
ENSG00000046651.10	OFD1	chrX	+	13773269	13773361	13769367	13769487	13774696	13774886	9.64134e-07	0.000823168	-0.077
ENSG00000164654.11	MIOS	chr7	+	7607656	7607754	7607113	7607319	7612066	7612298	9.56764e-07	0.000823168	-0.065
ENSG00000168255.14	POLR2J3	chr7	-	102207443	102208631	102181947	102182109	102210281	102210371	9.42866e-07	0.000823168	0.175
ENSG00000230074.1	RP11-195F19.9	chr9	+	34678096	34678265	34665661	34665764	34680902	34681295	9.52115e-07	0.000823168	0.384
ENSG00000196295.7	AC005154.6	chr7	-	30618621	30618744	30616179	30616326	30624945	30625095	1.04127e-06	0.000829737	-0.391
ENSG00000111801.11	BTN3A3	chr6	+	26448844	26448865	26448475	26448676	26448955	26448982	9.89204e-07	0.000829737	-0.337
ENSG00000155366.12	RHOC	chr1	-	113247721	113247823	113246265	113246428	113249699	113249724	1.00214e-06	0.000829737	-0.333
ENSG00000126091.15	ST3GAL3	chr1	+	44366420	44366505	44364839	44364961	44386075	44386176	1.03955e-06	0.000829737	-0.296
ENSG00000009790.10	TRAF3IP3	chr1	+	209952659	209952719	209950696	209950832	209953814	209953951	1.05167e-06	0.000829737	-0.13
ENSG00000104325.2	DECR1	chr8	+	91018263	91018505	91017675	91018073	91029351	91029554	1.06223e-06	0.000829737	-0.122
ENSG00000065802.7	ASB1	chr2	+	239341953	239342088	239335470	239335760	239342194	239342336	1.04561e-06	0.000829737	-0.064
ENSG00000104972.10	LILRB1	chr19	+	55146038	55146214	55145421	55145472	55146554	55146630	9.91723e-07	0.000829737	0.09
ENSG00000114021.7	NIT2	chr3	+	100058658	100058798	100053613	100053642	100059916	100060005	1.04928e-06	0.000829737	0.148
ENSG00000141556.16	TBCD	chr17	+	80867160	80867183	80851422	80851508	80869633	80869641	1.059e-06	0.000829737	0.159
ENSG00000267360.2	CTC-454I21.3	chr19	-	37689840	37689956	37686782	37686929	37697941	37698156	1.01473e-06	0.000829737	0.182
ENSG00000244625.1	CTA-211A9.5	chr22	+	27134024	27134203	27068767	27068950	27170118	27170180	1.15445e-06	0.000882982	-0.331
ENSG00000010310.4	GIPR	chr19	+	46180967	46181037	46180580	46180641	46181163	46181252	1.16484e-06	0.00088327	0.192
ENSG00000130726.7	TRIM28	chr19	+	59056791	59056904	59055457	59055578	59058742	59058878	1.17086e-06	0.00088327	0.363
ENSG00000103064.9	SLC7A6	chr16	+	68324298	68324443	68308593	68309152	68328607	68328704	1.18058e-06	0.00088454	-0.259
ENSG00000100106.15	TRIOBP	chr22	+	38109216	38109418	38106433	38106573	38111769	38111941	1.22588e-06	0.00091228	-0.291
ENSG00000138002.10	IFT172	chr2	-	27707093	27707133	27706738	27706804	27712481	27712545	1.24587e-06	0.000920934	0.166
ENSG00000131080.10	EDA2R	chrX	-	65824262	65824348	65822474	65822639	65824889	65825068	1.26521e-06	0.000928996	0.092
ENSG00000171311.8	EXOSC1	chr10	-	99198419	99198460	99196152	99196308	99200927	99201016	1.37554e-06	0.00100331	0.058
ENSG00000247498.5	RP11-392P7.6	chr12	+	13097305	13097415	13080660	13080737	13099968	13100172	1.43917e-06	0.00100366	-0.456
ENSG00000064313.7	TAF2	chr8	-	120816117	120816259	120809901	120810086	120831585	120831746	1.43981e-06	0.00100366	-0.216
ENSG00000179344.12	HLA-DQB1	chr6	-	32629123	32629234	32627243	32628026	32629743	32629862	1.41169e-06	0.00100366	-0.132
ENSG00000005108.11	THSD7A	chr7	-	11416196	11416284	11409983	11415505	11418696	11418907	1.43658e-06	0.00100366	-0.112
ENSG00000158006.9	PAFAH2	chr1	-	26315938	26316092	26314721	26314818	26317217	26317354	1.41848e-06	0.00100366	0.089
ENSG00000086666.14	ZFAND6	chr15	+	80390757	80390920	80351909	80352151	80423521	80423635	1.39446e-06	0.00100366	0.12
ENSG00000166762.12	CATSPER2	chr15	-	43941924	43942077	43932521	43932694	43956615	43956741	1.39414e-06	0.00100366	0.392
ENSG00000172785.14	CBWD1	chr9	-	177722	177820	175697	175784	185882	186011	1.47808e-06	0.00101746	-0.12
ENSG00000162616.8	DNAJB4	chr1	+	78458437	78458550	78444915	78444977	78478734	78479198	1.47128e-06	0.00101746	-0.112
ENSG00000105677.7	TMEM147	chr19	+	36037573	36037710	36036531	36036859	36038020	36038142	1.53316e-06	0.00104882	-0.145
ENSG00000110881.7	ASIC1	chr12	+	50470750	50470832	50453541	50453737	50470995	50471146	1.55364e-06	0.00105627	-0.183
ENSG00000174885.8	NLRP6	chr11	+	279833	279872	279326	279607	280083	281839	1.58373e-06	0.00105715	-0.188
ENSG00000076248.6	UNG	chr12	+	109542900	109543020	109541237	109541416	109547636	109548797	1.57553e-06	0.00105715	0.411
ENSG00000040341.13	STAU2	chr8	-	74650518	74650584	74529526	74529686	74659017	74659084	1.5788e-06	0.00105715	0.468
ENSG00000240498.2	CDKN2B-AS1	chr9	+	22063942	22064017	22056250	22056386	22077677	22077889	1.70087e-06	0.00112851	-0.401
ENSG00000105948.9	TTC26	chr7	+	138831890	138832036	138827001	138827051	138845693	138845768	1.84826e-06	0.00119577	-0.185
ENSG00000155393.8	HEATR3	chr16	+	50100277	50100450	50099851	50100180	50102690	50102778	1.86739e-06	0.00119577	-0.07
ENSG00000101104.8	PABPC1L	chr20	+	43547546	43547686	43541300	43541494	43550234	43550372	1.86159e-06	0.00119577	0.403
ENSG00000173889.11	PHC3	chr3	-	169863210	169863309	169846471	169847340	169889160	169889238	1.89793e-06	0.0012083	0.221
ENSG00000182648.7	LINC01006	chr7	-	156398351	156398458	156397881	156398074	156433229	156433275	1.93381e-06	0.00121016	-0.48
ENSG00000155366.12	RHOC	chr1	-	113247721	113247745	113246265	113246428	113249699	113249724	1.92969e-06	0.00121016	-0.327
ENSG00000162601.5	MYSM1	chr1	-	59154709	59154788	59150824	59150923	59156011	59156066	1.93256e-06	0.00121016	0.065
ENSG00000179818.9	PCBP1-AS1	chr2	-	70280862	70281126	70278334	70278437	70282845	70283042	2.12269e-06	0.00129459	-0.2
ENSG00000257303.1	RP11-977G19.11	chr12	+	56706190	56706283	56693925	56693971	56708312	56708572	2.13925e-06	0.00129459	-0.146
ENSG00000168421.8	RHOH	chr4	+	40207312	40207452	40198680	40198920	40244333	40244807	2.13194e-06	0.00129459	-0.142
ENSG00000188070.8	C11orf95	chr11	-	63532339	63532726	63531509	63532070	63533278	63533734	2.12274e-06	0.00129459	-0.124
ENSG00000149150.4	SLC43A1	chr11	-	57259188	57259335	57256723	57256865	57265225	57265318	2.10125e-06	0.00129459	0.373
ENSG00000137073.16	UBAP2	chr9	-	33956076	33956144	33948371	33948585	33998784	33998862	2.1232e-06	0.00129459	0.467
ENSG00000235618.3	RP11-324H6.5	chr10	-	51820706	51820764	51819424	51819484	51821237	51821356	2.17558e-06	0.00130938	0.382
ENSG00000171311.8	EXOSC1	chr10	-	99198426	99198460	99196089	99196308	99200927	99201016	2.23695e-06	0.0013226	0.054
ENSG00000213614.5	HEXA	chr15	-	72643473	72643575	72640388	72640475	72647899	72647965	2.33183e-06	0.00134948	-0.318
ENSG00000169375.11	SIN3A	chr15	-	75740393	75740514	75722527	75722749	75747975	75748124	2.31066e-06	0.00134948	-0.153
ENSG00000100031.14	GGT1	chr22	+	25005931	25006000	24999181	24999494	25006324	25006498	2.33081e-06	0.00134948	-0.125
ENSG00000177479.15	ARIH2	chr3	+	48982414	48982614	48960180	48960244	49002351	49002415	2.34022e-06	0.00134948	0.27
ENSG00000154358.15	OBSCN	chr1	+	228480223	228480487	228479598	228479862	228481053	228481317	2.38567e-06	0.00136852	0.394
ENSG00000206562.7	METTL6	chr3	-	15456236	15456421	15452842	15452944	15457004	15457090	2.41275e-06	0.00136979	-0.297
ENSG00000140374.11	ETFA	chr15	-	76576705	76576801	76576097	76576166	76577145	76577268	2.40314e-06	0.00136979	0.209
ENSG00000100031.14	GGT1	chr22	+	25005928	25006000	24999201	24999494	25006324	25006498	2.46528e-06	0.00139243	-0.121
ENSG00000122033.10	MTIF3	chr13	-	28019224	28019293	28009775	28010030	28024645	28024711	2.56086e-06	0.00143903	-0.269
ENSG00000250337.1	LINC01021	chr5	+	27489388	27489493	27475641	27475802	27494341	27494425	2.70436e-06	0.00150432	-0.52
ENSG00000146733.9	PSPH	chr7	-	56101653	56101799	56099621	56099670	56118830	56119139	2.70105e-06	0.00150432	-0.158
ENSG00000204623.4	ZNRD1-AS1	chr6	-	30002684	30002887	29989443	29989538	30025891	30025967	2.73817e-06	0.00151547	0.161
ENSG00000188917.10	TRMT2B	chrX	-	100306239	100306355	100290601	100290672	100306772	100307105	2.82901e-06	0.00155792	-0.308
ENSG00000152944.4	MED21	chr12	+	27213759	27213926	27199084	27199165	27217208	27217429	2.87219e-06	0.00155903	-0.201
ENSG00000096433.6	ITPR3	chr6	+	33626797	33626896	33626446	33626605	33627242	33627326	2.85319e-06	0.00155903	-0.084
ENSG00000136573.8	BLK	chr8	+	11412251	11412398	11407502	11407771	11412840	11412993	2.92292e-06	0.00157807	0.223
ENSG00000254319.1	RP11-134O21.1	chr8	-	2562745	2562817	2532237	2532353	2585869	2585929	3.01574e-06	0.00161238	-0.188
ENSG00000116717.7	GADD45A	chr1	+	68151707	68151809	68150743	68151221	68152032	68152270	3.00355e-06	0.00161238	0.081
ENSG00000104450.8	SPAG1	chr8	+	101232506	101232659	101225317	101225656	101237400	101237567	3.06883e-06	0.00163284	0.13
ENSG00000172765.12	TMCC1	chr3	-	129576092	129576248	129551616	129551669	129585852	129585941	3.17228e-06	0.00167173	-0.483
ENSG00000237298.4	TTN-AS1	chr2	+	179436026	179436176	179387950	179388363	179448439	179448648	3.21568e-06	0.00168653	-0.184
ENSG00000244625.1	CTA-211A9.5	chr22	+	27122606	27122757	27068729	27068950	27170118	27170180	3.28811e-06	0.00170825	-0.187
ENSG00000164896.15	FASTK	chr7	-	150773999	150774114	150773710	150773919	150774396	150774488	3.28718e-06	0.00170825	-0.063
ENSG00000211455.3	STK38L	chr12	+	27461271	27461394	27455068	27455121	27462046	27462130	3.31666e-06	0.001715	0.058
ENSG00000211454.9	AKR7L	chr1	-	19595765	19595865	19595065	19595195	19596944	19597049	3.40943e-06	0.00175473	-0.228
ENSG00000118900.10	UBN1	chr16	+	4927385	4927475	4924211	4925435	4930083	4930446	3.45527e-06	0.00177005	0.073
ENSG00000134490.9	TMEM241	chr18	-	20950179	20950225	20936557	20936627	20951385	20951434	3.5043e-06	0.00177117	0.475
ENSG00000186951.12	PPARA	chr22	+	46571885	46572041	46547790	46547873	46572649	46572733	3.53361e-06	0.00177711	0.169
ENSG00000196535.10	MYO18A	chr17	-	27451670	27451706	27449183	27449271	27452910	27452985	3.55263e-06	0.00177856	0.369
ENSG00000148843.9	PDCD11	chr10	+	105159403	105159587	105158172	105158285	105162874	105163042	3.62699e-06	0.00180757	0.138
ENSG00000001617.7	SEMA3F	chr3	+	50212528	50212621	50211663	50211783	50214200	50214294	3.67407e-06	0.0018159	-0.368
ENSG00000040275.12	SPDL1	chr5	+	169014202	169014376	169011091	169011170	169015397	169015579	3.67667e-06	0.0018159	0.104
ENSG00000213742.2	RP4-694B14.5	chr20	+	25612793	25612924	25604680	25604771	25614684	25614806	3.70111e-06	0.00181981	-0.23
ENSG00000150455.9	TIRAP	chr11	+	126161319	126161464	126160697	126160856	126162371	126162582	3.72354e-06	0.0018227	0.196
ENSG00000181135.11	ZNF707	chr8	+	144772226	144772293	144766621	144766712	144773242	144773369	3.7575e-06	0.00183118	0.063
ENSG00000101901.6	ALG13	chrX	+	110932314	110932425	110928192	110928331	110954902	110954953	3.80955e-06	0.00184082	-0.231
ENSG00000048991.12	R3HDM1	chr2	+	136374237	136374327	136360069	136360278	136379063	136379178	3.97354e-06	0.0019111	0.1
ENSG00000166167.13	BTRC	chr10	+	103190101	103190209	103113819	103113985	103239124	103239214	4.14473e-06	0.00198477	-0.218
ENSG00000179818.9	PCBP1-AS1	chr2	-	70280862	70280947	70278407	70278437	70282845	70283042	4.24193e-06	0.0020138	-0.269
ENSG00000142920.12	ADC	chr1	+	33549554	33549728	33547778	33547955	33557650	33557811	4.2626e-06	0.00201493	0.23
ENSG00000230084.1	RP4-613B23.1	chr3	-	42674120	42674187	42665255	42665304	42695485	42695880	4.46341e-06	0.00207424	-0.412
ENSG00000185480.7	PARPBP	chr12	+	102576326	102576405	102569260	102569444	102589728	102591139	4.45494e-06	0.00207424	-0.124
ENSG00000178999.8	AURKB	chr17	-	8113494	8113567	8110888	8110943	8113847	8113877	4.59304e-06	0.00211662	0.28
ENSG00000169057.15	MECP2	chrX	-	153305242	153305354	153297884	153298008	153323193	153323221	4.63083e-06	0.00212515	-0.283
ENSG00000131018.18	SYNE1	chr6	-	152451854	152451913	152442818	152443811	152453256	152453349	4.74863e-06	0.00217016	-0.204
ENSG00000154262.8	ABCA6	chr17	-	67109362	67109501	67108323	67108414	67109758	67109878	4.77634e-06	0.00217381	-0.306
ENSG00000185379.16	RAD51D	chr17	-	33443877	33444056	33434006	33434141	33446129	33446191	4.9632e-06	0.00224418	0.31
ENSG00000168517.6	HEXIM2	chr17	+	43239854	43240002	43238066	43238310	43240116	43240226	5.03162e-06	0.00225799	-0.224
ENSG00000131089.9	ARHGEF9	chrX	-	62974183	62974556	62944411	62944591	62974800	62974991	5.0433e-06	0.00225799	-0.07
ENSG00000146733.9	PSPH	chr7	-	56110840	56110954	56101653	56101847	56119006	56119085	5.12786e-06	0.00226892	0.476
ENSG00000130958.7	SLC35D2	chr9	-	99107580	99107683	99106185	99106278	99113384	99113453	5.28521e-06	0.00232843	-0.118
ENSG00000164124.6	TMEM144	chr4	+	159136342	159136465	159133759	159133928	159140461	159140542	5.38476e-06	0.00235841	0.275
ENSG00000111832.8	RWDD1	chr6	+	116894020	116894148	116893584	116893641	116895220	116895334	5.51292e-06	0.0023905	-0.356
ENSG00000100445.12	SDR39U1	chr14	-	24910883	24911001	24909988	24910132	24911314	24911466	5.747e-06	0.00248223	-0.215
ENSG00000140386.8	SCAPER	chr15	-	77196954	77197132	77176152	77176217	77197639	77197678	5.8248e-06	0.00250601	0.053
ENSG00000228486.5	AC017099.3	chr2	+	98310909	98311062	98306718	98306790	98315488	98315595	5.88399e-06	0.00252162	-0.26
ENSG00000151576.6	QTRTD1	chr3	+	113786833	113786910	113775581	113775711	113789472	113789598	5.97722e-06	0.00254233	-0.053
ENSG00000111731.8	C2CD5	chr12	-	22611417	22611489	22609904	22610095	22612425	22612476	6.48914e-06	0.00270722	-0.149
ENSG00000134686.12	PHC2	chr1	-	33834136	33834223	33832716	33833029	33836021	33836186	6.62827e-06	0.00275483	-0.266
ENSG00000137802.9	MAPKBP1	chr15	+	42115136	42115204	42114790	42114875	42116681	42116767	6.67548e-06	0.00276403	0.151
ENSG00000054118.9	THRAP3	chr1	+	36691012	36691064	36690571	36690703	36748133	36748285	6.73094e-06	0.00277655	-0.465
ENSG00000112584.9	FAM120B	chr6	+	170667313	170667406	170639536	170639638	170697374	170697581	6.77302e-06	0.00278348	0.058
ENSG00000235903.3	CPB2-AS1	chr13	+	46671244	46671534	46668987	46669137	46672532	46674159	6.88164e-06	0.00279681	-0.547
ENSG00000204120.10	GIGYF2	chr2	+	233583747	233583838	233568133	233568199	233587263	233587368	6.85133e-06	0.00279681	0.064
ENSG00000184635.9	ZNF93	chr19	+	20018532	20018625	20011721	20011900	20025542	20025631	6.92882e-06	0.00280564	-0.524
ENSG00000173818.12	ENDOV	chr17	+	78402395	78402460	78399258	78399420	78403572	78403618	7.21419e-06	0.00289987	0.057
ENSG00000272916.1	RP11-574K11.31	chr10	-	75560260	75560317	75557579	75557817	75562431	75562534	7.46426e-06	0.00297372	0.41
ENSG00000048028.7	USP28	chr11	-	113702641	113702711	113701588	113701665	113704141	113704279	7.59456e-06	0.00298735	-0.21
ENSG00000130714.11	POMT1	chr9	+	134381500	134381607	134379575	134379727	134381789	134381840	7.56761e-06	0.00298735	-0.058
ENSG00000160293.12	VAV2	chr9	-	136792917	136793014	136790972	136791070	136804224	136804423	7.68347e-06	0.00299243	-0.471
ENSG00000157036.8	EXOG	chr3	+	38540257	38540327	38539119	38539269	38540416	38540480	7.69802e-06	0.00299243	-0.431
ENSG00000188283.7	ZNF383	chr19	+	37715719	37715841	37710500	37710651	37721310	37721364	7.71617e-06	0.00299243	0.08
ENSG00000083097.10	DOPEY1	chr6	+	83858477	83858582	83855242	83855377	83861311	83861378	7.7117e-06	0.00299243	0.128
ENSG00000239998.1	LILRA2	chr19	+	55085297	55085379	55084817	55084902	55086197	55086500	7.77287e-06	0.00299334	-0.169
ENSG00000118557.11	PMFBP1	chr16	-	72184506	72184728	72174310	72174481	72198662	72198815	7.74655e-06	0.00299334	0.277
ENSG00000136250.7	AOAH	chr7	-	36698770	36698870	36677456	36677516	36713547	36713614	7.93376e-06	0.00303819	-0.098
ENSG00000162910.14	MRPL55	chr1	-	228296655	228296722	228296137	228296175	228296961	228296996	7.94448e-06	0.00303819	0.228
ENSG00000143224.13	PPOX	chr1	+	161137128	161137276	161136889	161137024	161140409	161140559	8.00841e-06	0.00304877	-0.42
ENSG00000083535.11	PIBF1	chr13	+	73357560	73357859	73356196	73356487	73366584	73366685	8.02752e-06	0.00304877	0.057
ENSG00000109320.7	NFKB1	chr4	+	103455004	103455042	103450992	103451071	103459014	103459056	8.19067e-06	0.00310004	0.058
ENSG00000172081.9	MOB3A	chr19	-	2095239	2095322	2078512	2078678	2096224	2096269	8.22593e-06	0.00310273	0.245
ENSG00000128739.16	SNRPN	chr15	+	25219544	25219603	25207260	25207356	25221451	25221563	8.49414e-06	0.00318209	0.21
ENSG00000175792.7	RUVBL1	chr3	-	127787478	127787756	127783620	127784063	127801325	127801417	8.7734e-06	0.00326593	-0.092
ENSG00000185684.8	EP400NL	chr12	+	132575939	132576061	132575393	132575488	132593116	132593444	8.78602e-06	0.00326593	0.528
ENSG00000105048.12	TNNT1	chr19	-	55653224	55653425	55652553	55652670	55656911	55656933	8.95247e-06	0.00329771	-0.108
ENSG00000162572.15	SCNN1D	chr1	+	1220950	1221044	1219357	1219470	1221305	1221658	9.10668e-06	0.00334334	-0.222
ENSG00000185475.4	TMEM179B	chr11	+	62556763	62556898	62554886	62554999	62557357	62557718	9.19018e-06	0.00336278	0.121
ENSG00000263072.1	RP11-473M20.14	chr16	-	3182850	3183195	3179461	3179654	3184630	3184857	9.27297e-06	0.00338017	-0.168
ENSG00000154358.15	OBSCN	chr1	+	228492823	228493087	228486154	228486418	228494072	228494339	9.29909e-06	0.00338017	0.383
ENSG00000124574.10	ABCC10	chr6	+	43398485	43398604	43395285	43395437	43399879	43399914	9.33529e-06	0.00338217	0.372
ENSG00000179523.4	EIF3J-AS1	chr15	-	44828240	44828556	44827449	44827672	44828998	44829098	9.46699e-06	0.00340747	-0.113
ENSG00000171428.9	NAT1	chr8	+	18074385	18074503	18068701	18068851	18076919	18076998	9.52128e-06	0.00341584	-0.331
ENSG00000118495.14	PLAGL1	chr6	-	144306271	144306311	144290043	144290115	144385604	144385735	9.62981e-06	0.00343242	-0.495
ENSG00000163812.9	ZDHHC3	chr3	-	45000079	45000177	44975379	44975476	45000622	45000952	9.60365e-06	0.00343242	-0.15
ENSG00000172965.10	MIR4435-1HG	chr2	-	112005724	112005818	111965352	111966238	112101637	112101814	9.87783e-06	0.0034917	0.346
ENSG00000162851.6	TFB2M	chr1	-	246719874	246720023	246714514	246714604	246727647	246727736	1.00446e-05	0.00353452	0.057
ENSG00000074054.13	CLASP1	chr2	-	122286252	122286356	122283420	122283496	122363276	122363756	1.02024e-05	0.00353954	-0.581
ENSG00000197381.11	ADARB1	chr21	+	46538478	46538534	46494483	46494708	46540708	46540874	1.02838e-05	0.00353954	-0.25
ENSG00000151062.10	CACNA2D4	chr12	-	2024019	2024101	2022188	2022305	2027412	2027639	1.02621e-05	0.00353954	-0.14
ENSG00000198718.8	FAM179B	chr14	+	45496501	45496677	45494985	45495075	45497378	45497499	1.02193e-05	0.00353954	-0.059
ENSG00000106829.14	TLE4	chr9	+	82242288	82242363	82227570	82227633	82264734	82264773	1.02476e-05	0.00353954	0.053
ENSG00000185760.11	KCNQ5	chr6	+	73814979	73815090	73787044	73787220	73821030	73821126	1.01176e-05	0.00353954	0.166
ENSG00000150076.18	C10orf68	chr10	+	32912646	32912745	32873189	32873232	32974897	32975008	1.0247e-05	0.00353954	0.285
ENSG00000176978.9	DPP7	chr9	-	140006392	140006481	140006141	140006206	140007404	140007571	1.04566e-05	0.00356876	-0.134
ENSG00000138658.11	C4orf21	chr4	-	113524679	113524853	113508435	113509085	113527163	113527247	1.04421e-05	0.00356876	0.189
ENSG00000175893.7	ZDHHC21	chr9	-	14683568	14683727	14639893	14640010	14690334	14690383	1.0466e-05	0.00356876	0.274
ENSG00000167380.12	ZNF226	chr19	+	44673717	44673781	44670857	44671035	44674187	44674248	1.05157e-05	0.00357465	0.651
ENSG00000155256.13	ZFYVE27	chr10	+	99504485	99504672	99498233	99498431	99508025	99508121	1.0661e-05	0.0036129	-0.053
ENSG00000118420.12	UBE3D	chr6	-	83763866	83763957	83754146	83754378	83767544	83767688	1.07744e-05	0.00364014	0.061
ENSG00000204316.8	MRPL38	chr17	-	73901738	73901825	73900620	73900800	73904201	73904277	1.10935e-05	0.00371377	-0.429
ENSG00000221978.7	CCNL2	chr1	-	1324005	1324123	1323871	1323890	1325609	1325751	1.10854e-05	0.00371377	-0.129
ENSG00000162604.8	TM2D1	chr1	-	62189959	62190097	62189384	62189444	62190573	62190785	1.12017e-05	0.00373861	0.174
ENSG00000166750.5	SLFN5	chr17	+	33591201	33591922	33587989	33588115	33592090	33600674	1.12443e-05	0.00374151	-0.151
ENSG00000185480.7	PARPBP	chr12	+	102589089	102589225	102569260	102569444	102589728	102590207	1.12925e-05	0.00374623	-0.075
ENSG00000105948.9	TTC26	chr7	+	138845693	138845768	138827001	138827051	138849877	138849980	1.14846e-05	0.00378713	-0.1
ENSG00000204120.10	GIGYF2	chr2	+	233587263	233587368	233583747	233583838	233599864	233599947	1.15383e-05	0.00379349	0.494
ENSG00000248508.2	SRP14-AS1	chr15	+	40348653	40348842	40338161	40338270	40348930	40349184	1.16507e-05	0.00381904	-0.329
ENSG00000140968.6	IRF8	chr16	+	85948078	85948126	85945175	85945264	85953714	85953830	1.17802e-05	0.00383863	0.16
ENSG00000188825.9	LINC00910	chr17	-	41465303	41465425	41458655	41459028	41465656	41465699	1.17552e-05	0.00383863	0.313
ENSG00000092330.11	TINF2	chr14	-	24710880	24710982	24708887	24710081	24711346	24711811	1.20308e-05	0.0038858	0.148
ENSG00000196663.11	TECPR2	chr14	+	102898132	102898465	102894586	102894719	102900571	102901548	1.21192e-05	0.00390141	-0.121
ENSG00000162994.11	CLHC1	chr2	-	55439808	55439942	55436765	55436967	55444946	55445134	1.215e-05	0.00390141	0.134
ENSG00000196182.6	STK40	chr1	-	36833452	36833685	36824337	36824423	36851323	36851480	1.22503e-05	0.00392221	-0.13
ENSG00000114331.8	ACAP2	chr3	-	195133574	195133645	195112818	195112876	195162878	195163005	1.22883e-05	0.00392295	0.251
ENSG00000145819.11	ARHGAP26	chr5	+	142586947	142587038	142526795	142526946	142593561	142593653	1.24996e-05	0.00396743	0.14
ENSG00000072042.8	RDH11	chr14	-	68159154	68159310	68156928	68157138	68162346	68162491	1.29811e-05	0.0041084	0.313
ENSG00000211454.9	AKR7L	chr1	-	19596076	19596173	19595065	19595195	19596944	19597049	1.31444e-05	0.00414817	-0.245
ENSG00000155085.11	AK9	chr6	-	109954386	109954526	109935587	109935683	109962720	109962819	1.33508e-05	0.00420126	-0.166
ENSG00000100325.10	ASCC2	chr22	-	30229529	30229603	30228233	30228331	30234166	30234217	1.3458e-05	0.00421335	-0.06
ENSG00000115677.12	HDLBP	chr2	-	242208620	242208710	242207891	242207956	242211331	242211386	1.34657e-05	0.00421335	0.135
ENSG00000137075.13	RNF38	chr9	-	36390463	36390613	36369715	36369929	36424609	36424680	1.36736e-05	0.00423127	-0.125
ENSG00000188033.5	ZNF490	chr19	-	12748089	12748254	12745224	12745302	12750878	12750912	1.36767e-05	0.00423127	0.247
ENSG00000161996.13	WDR90	chr16	+	705028	705147	703524	703670	705306	705468	1.38075e-05	0.0042598	0.069
ENSG00000172845.9	SP3	chr2	-	174829132	174829281	174819600	174820960	174829892	174830430	1.39703e-05	0.00429798	-0.064
ENSG00000169057.15	MECP2	chrX	-	153357641	153357765	153297657	153298008	153363060	153363120	1.40523e-05	0.00431116	0.055
ENSG00000172006.7	ZNF554	chr19	+	2826247	2826344	2823037	2823110	2827614	2827741	1.4132e-05	0.00432357	0.094
ENSG00000160325.10	CACFD1	chr9	+	136330443	136330569	136328604	136328677	136333042	136333150	1.4296e-05	0.00434959	-0.273
ENSG00000140694.12	PARN	chr16	-	14672387	14672485	14669928	14670133	14674730	14674800	1.42776e-05	0.00434959	0.244
ENSG00000143774.12	GUK1	chr1	+	228329333	228329530	228328949	228328989	228333192	228333325	1.43365e-05	0.00434989	0.323
ENSG00000022277.8	RTFDC1	chr20	+	55045655	55045807	55043741	55043822	55046669	55046725	1.47521e-05	0.00443929	-0.199
ENSG00000058056.4	USP13	chr3	+	179418795	179418917	179399665	179399791	179424721	179424864	1.47227e-05	0.00443929	0.068
ENSG00000070371.11	CLTCL1	chr22	-	19223218	19223392	19220944	19221145	19230297	19230459	1.48871e-05	0.00446032	0.095
ENSG00000176909.7	MAMSTR	chr19	-	49216972	49217027	49215998	49216807	49217116	49217302	1.49571e-05	0.00446438	-0.226
ENSG00000081721.7	DUSP12	chr1	+	161720921	161721167	161719594	161719878	161721444	161721571	1.504e-05	0.00447701	-0.245
ENSG00000185480.7	PARPBP	chr12	+	102576326	102576405	102569260	102569444	102589089	102589225	1.51479e-05	0.00449697	-0.085
ENSG00000070081.11	NUCB2	chr11	+	17312786	17312912	17305007	17305111	17316870	17316988	1.52518e-05	0.00451565	0.059
ENSG00000144504.11	ANKMY1	chr2	-	241446976	241447108	241439868	241439982	241451277	241451418	1.53634e-05	0.00453648	0.141
ENSG00000133627.13	ACTR3B	chr7	+	152480271	152480327	152456833	152457011	152498705	152498816	1.56178e-05	0.0045831	-0.231
ENSG00000089916.13	GPATCH2L	chr14	+	76644550	76644665	76644234	76644274	76647106	76647192	1.56104e-05	0.0045831	0.218
ENSG00000157036.8	EXOG	chr3	+	38541171	38541238	38540416	38540480	38542845	38542985	1.58142e-05	0.00462006	0.262
ENSG00000237298.4	TTN-AS1	chr2	+	179406948	179407088	179388018	179388363	179448439	179448648	1.59127e-05	0.00463652	-0.144
ENSG00000126903.11	SLC10A3	chrX	-	153718280	153718366	153715649	153717421	153718932	153718967	1.60201e-05	0.0046555	-0.601
ENSG00000127415.8	IDUA	chr4	+	997132	997258	996823	996945	997336	997413	1.62363e-05	0.00470593	-0.054
ENSG00000141696.8	LEPREL4	chr17	-	39959538	39959683	39958198	39959231	39963047	39963100	1.62803e-05	0.00470628	0.1
ENSG00000197858.6	GPAA1	chr8	+	145138291	145138327	145137528	145137707	145138616	145138764	1.69059e-05	0.00487436	0.164
ENSG00000168237.13	GLYCTK	chr3	+	52325762	52325938	52324975	52325127	52327061	52327150	1.6955e-05	0.00487575	-0.127
ENSG00000106609.12	TMEM248	chr7	+	66387135	66387233	66386218	66386448	66413530	66413681	1.7012e-05	0.0048794	-0.345
ENSG00000250337.1	LINC01021	chr5	+	27485032	27485136	27475641	27475802	27494341	27494425	1.70878e-05	0.0048884	-0.317
ENSG00000237484.5	AP000476.1	chr21	+	25814108	25814227	25801053	25801218	25857936	25857999	1.73666e-05	0.00495528	-0.156
ENSG00000234492.4	RPL34-AS1	chr4	-	109529678	109529806	109523868	109524001	109541463	109541551	1.7462e-05	0.00495732	-0.323
ENSG00000133466.9	C1QTNF6	chr22	-	37591420	37591552	37587711	37587777	37593642	37593881	1.74638e-05	0.00495732	-0.297
ENSG00000106346.7	USP42	chr7	+	6167768	6167861	6156425	6156570	6175471	6175582	1.75107e-05	0.00495788	0.49
ENSG00000112039.3	FANCE	chr6	+	35428328	35428395	35427458	35427537	35434020	35434880	1.77427e-05	0.00501069	-0.116
ENSG00000124177.10	CHD6	chr20	-	40192649	40192790	40179943	40179999	40243347	40243412	1.79041e-05	0.00501792	-0.293
ENSG00000184465.11	WDR27	chr6	-	170059181	170059303	170058371	170058454	170059546	170059614	1.79051e-05	0.00501792	0.054
ENSG00000196295.7	AC005154.6	chr7	-	30624326	30624424	30618621	30618744	30624945	30625095	1.78242e-05	0.00501792	0.144
ENSG00000157036.8	EXOG	chr3	+	38541580	38541655	38540416	38540480	38542845	38542985	1.79725e-05	0.00502404	0.29
ENSG00000083097.10	DOPEY1	chr6	+	83856954	83857010	83855242	83855377	83861311	83861378	1.81013e-05	0.00504724	0.121
ENSG00000118762.3	PKD2	chr4	+	88967793	88968022	88959402	88959653	88973142	88973310	1.82379e-05	0.00507249	0.085
ENSG00000186141.4	POLR3C	chr1	-	145595118	145595220	145592604	145592771	145601529	145601622	1.83426e-05	0.00508876	-0.255
ENSG00000107077.13	KDM4C	chr9	+	6942459	6942634	6893122	6893232	6948032	6948214	1.8483e-05	0.00510751	-0.369
ENSG00000188352.8	FOCAD	chr9	+	20658689	20658825	20658307	20658458	20715320	20715409	1.85957e-05	0.00510751	-0.165
ENSG00000164002.7	EXO5	chr1	+	40975122	40975297	40974412	40974549	40975404	40975462	1.85904e-05	0.00510751	-0.154
ENSG00000080823.17	MOK	chr14	-	102717780	102717947	102717148	102717324	102718092	102718141	1.85306e-05	0.00510751	0.194
ENSG00000254505.4	CHMP4A	chr14	-	24680885	24681030	24679859	24679974	24682614	24682695	1.87698e-05	0.00514252	-0.078
ENSG00000143093.10	STRIP1	chr1	+	110583256	110583325	110581793	110581928	110585709	110585892	1.90294e-05	0.00517502	-0.285
ENSG00000177728.10	KIAA0195	chr17	+	73487771	73487933	73487457	73487536	73488554	73488870	1.91785e-05	0.00517721	-0.051
ENSG00000102710.15	SUPT20H	chr13	-	37621482	37621545	37619383	37619513	37621671	37621738	1.91622e-05	0.00517721	0.064
ENSG00000139990.13	DCAF5	chr14	-	69616147	69616220	69588933	69589077	69619660	69619757	1.98197e-05	0.00533722	-0.118
ENSG00000198420.5	FAM115A	chr7	-	143579015	143579192	143573200	143573715	143599119	143599219	2.00646e-05	0.00538999	0.101
ENSG00000155085.11	AK9	chr6	-	109940294	109940439	109935587	109935683	109962720	109962819	2.08147e-05	0.00556435	-0.152
ENSG00000080947.10	CROCCP3	chr1	-	16817359	16817421	16817112	16817278	16825697	16825752	2.1277e-05	0.00558009	-0.391
ENSG00000137101.8	CD72	chr9	-	35618218	35618434	35618010	35618118	35619508	35619539	2.11053e-05	0.00558009	-0.11
ENSG00000112039.3	FANCE	chr6	+	35430565	35430691	35427458	35427537	35434020	35434880	2.11197e-05	0.00558009	-0.067
ENSG00000100916.9	BRMS1L	chr14	+	36299000	36299113	36295646	36295864	36300615	36300706	2.11382e-05	0.00558009	-0.066
ENSG00000143748.13	NVL	chr1	-	224489392	224489473	224488263	224488365	224492437	224492514	2.10934e-05	0.00558009	0.16
ENSG00000205643.6	CDPF1	chr22	-	46644068	46644181	46639909	46641135	46646152	46646186	2.12118e-05	0.00558009	0.524
ENSG00000111325.12	OGFOD2	chr12	+	123462527	123462604	123461417	123461517	123462906	123463094	2.14559e-05	0.00558818	-0.144
ENSG00000114030.8	KPNA1	chr3	-	122178285	122178528	122172716	122172848	122178620	122179504	2.15127e-05	0.00558818	0.126
ENSG00000134490.9	TMEM241	chr18	-	20945597	20945632	20936557	20936627	20951385	20951434	2.14931e-05	0.00558818	0.169
ENSG00000133466.9	C1QTNF6	chr22	-	37591420	37591498	37587711	37587777	37593642	37593788	2.16221e-05	0.0055993	-0.339
ENSG00000125434.6	SLC25A35	chr17	-	8193171	8193302	8191081	8192961	8193920	8193996	2.16572e-05	0.0055993	0.276
ENSG00000140386.8	SCAPER	chr15	-	77087581	77087781	77067195	77067458	77092588	77092608	2.17399e-05	0.00560753	0.072
ENSG00000078043.11	PIAS2	chr18	-	44473393	44473494	44470994	44471017	44483489	44483598	2.18569e-05	0.00562453	-0.074
ENSG00000114331.8	ACAP2	chr3	-	195131435	195131738	195112818	195112876	195133574	195133645	2.19777e-05	0.00564242	-0.156
ENSG00000115194.6	SLC30A3	chr2	-	27480772	27480926	27480021	27480220	27481028	27481175	2.21044e-05	0.00564861	-0.188
ENSG00000135297.11	MTO1	chr6	+	74189454	74189567	74176211	74176329	74190397	74190528	2.20669e-05	0.00564861	-0.142
ENSG00000157036.8	EXOG	chr3	+	38540416	38540480	38539119	38539180	38542845	38542985	2.26355e-05	0.00575762	-0.405
ENSG00000125089.12	SH3TC1	chr4	+	8234433	8234792	8233702	8233883	8235089	8235240	2.29397e-05	0.00582155	-0.207
ENSG00000148824.14	MTG1	chr10	+	135215032	135215094	135212673	135212730	135215652	135215749	2.30629e-05	0.00582597	0.072
ENSG00000138002.10	IFT172	chr2	-	27668611	27668710	27668162	27668316	27668795	27668855	2.33012e-05	0.00586443	0.051
ENSG00000184489.7	PTP4A3	chr8	+	142437849	142437924	142437038	142437169	142441026	142441394	2.33815e-05	0.0058661	-0.061
ENSG00000151576.6	QTRTD1	chr3	+	113775845	113775953	113775583	113775711	113789472	113789685	2.37029e-05	0.00590138	-0.1
ENSG00000103313.7	MEFV	chr16	-	3294472	3294588	3294135	3294286	3296524	3296547	2.36953e-05	0.00590138	-0.063
ENSG00000173473.6	SMARCC1	chr3	-	47677511	47677626	47663696	47663831	47702783	47702945	2.37365e-05	0.00590138	0.235
ENSG00000172671.15	ZFAND4	chr10	-	46147413	46147481	46143741	46143982	46158989	46159290	2.40279e-05	0.00596038	0.178
ENSG00000203666.8	EFCAB2	chr1	+	245165422	245165534	245133283	245133745	245180543	245180628	2.41843e-05	0.0059857	-0.133
ENSG00000114030.8	KPNA1	chr3	-	122176572	122176695	122172716	122172848	122178620	122179504	2.46261e-05	0.00606777	0.15
ENSG00000179151.7	EDC3	chr15	-	74979431	74979520	74967301	74967483	74985226	74985359	2.47469e-05	0.00608394	0.098
ENSG00000103599.15	IQCH	chr15	+	67571732	67571850	67553609	67553732	67636400	67636529	2.48663e-05	0.00609966	0.128
ENSG00000124508.12	BTN2A2	chr6	+	26384019	26384143	26383323	26383527	26388240	26388477	2.53228e-05	0.00615316	-0.312
ENSG00000118985.10	ELL2	chr5	-	95249474	95249638	95236659	95236784	95278705	95278753	2.53628e-05	0.00615316	-0.167
ENSG00000026508.12	CD44	chr11	+	35226058	35226187	35223214	35223334	35236398	35236461	2.5202e-05	0.00615316	-0.15
ENSG00000089177.13	KIF16B	chr20	-	16316570	16316660	16292979	16293063	16336974	16337097	2.51815e-05	0.00615316	-0.098
ENSG00000089022.9	MAPKAPK5	chr12	+	112306556	112306665	112303959	112304035	112308888	112308984	2.53973e-05	0.00615316	0.12
ENSG00000171466.5	ZNF562	chr19	-	9770054	9770143	9767222	9767329	9785690	9785720	2.54196e-05	0.00615316	0.248
ENSG00000178795.5	GDPD4	chr11	-	76982339	76982438	76981964	76982268	76987205	76987265	2.57249e-05	0.0062057	-0.532
ENSG00000136960.8	ENPP2	chr8	-	120584415	120584490	120582944	120583081	120592355	120592407	2.57493e-05	0.0062057	0.056
ENSG00000069943.5	PIGB	chr15	+	55642896	55643110	55633935	55634000	55646995	55647176	2.58253e-05	0.00621041	0.059
ENSG00000148180.12	GSN	chr9	+	124044716	124044828	124043747	124043840	124062342	124062404	2.60223e-05	0.00623058	-0.296
ENSG00000091592.11	NLRP1	chr17	-	5440170	5440260	5437216	5437308	5442734	5442905	2.5988e-05	0.00623058	0.133
ENSG00000188825.9	LINC00910	chr17	-	41456490	41456630	41453295	41455181	41458640	41459028	2.61167e-05	0.00623962	-0.201
ENSG00000132780.12	NASP	chr1	+	46060365	46060445	46056894	46056942	46066056	46066129	2.62175e-05	0.00625016	-0.071
ENSG00000100802.10	C14orf93	chr14	-	23469165	23469326	23467981	23468365	23470167	23470269	2.636e-05	0.00627055	0.189
ENSG00000114107.4	CEP70	chr3	-	138291700	138291826	138255760	138256189	138310695	138310798	2.70979e-05	0.00643219	-0.079
ENSG00000131591.13	C1orf159	chr1	-	1027370	1027483	1026425	1026945	1041335	1041429	2.73138e-05	0.0064695	-0.051
ENSG00000153774.4	CFDP1	chr16	-	75425277	75425406	75338921	75339080	75445722	75445850	2.76456e-05	0.0065061	-0.316
ENSG00000187609.11	EXD3	chr9	-	140249151	140249225	140248790	140248829	140250719	140250820	2.79485e-05	0.00651864	-0.359
ENSG00000258168.1	RP11-588H23.3	chr12	+	70903991	70904064	70861864	70862107	70921454	70921518	2.79094e-05	0.00651864	-0.339
ENSG00000154358.15	OBSCN	chr1	+	228480223	228480487	228476325	228476589	228481053	228481317	2.7861e-05	0.00651864	-0.099
ENSG00000070081.11	NUCB2	chr11	+	17308180	17308264	17305007	17305111	17316870	17316972	2.87259e-05	0.00663279	0.056
ENSG00000150433.5	TMEM218	chr11	-	124980386	124980445	124972629	124972705	124981434	124981485	2.92834e-05	0.00671925	0.095
ENSG00000066027.7	PPP2R5A	chr1	+	212521730	212521839	212519144	212519275	212529967	212530018	2.94733e-05	0.00674878	0.408
ENSG00000181790.6	BAI1	chr8	+	143603325	143603476	143602183	143602286	143604001	143604071	2.97017e-05	0.00678697	-0.196
ENSG00000074370.13	ATP2A3	chr17	-	3831520	3831621	3831274	3831332	3831956	3832074	2.98098e-05	0.00679755	-0.269
ENSG00000186998.11	EMID1	chr22	+	29622410	29622540	29621121	29621205	29627008	29627129	3.00742e-05	0.00682956	-0.134
ENSG00000148180.12	GSN	chr9	+	124045596	124045670	124043749	124043840	124062342	124062404	3.02524e-05	0.00684183	-0.199
ENSG00000085832.12	EPS15	chr1	-	51924712	51924820	51924067	51924405	51926762	51926822	3.01989e-05	0.00684183	0.26
ENSG00000262246.1	CORO7	chr16	-	4457562	4457685	4455491	4455568	4462356	4462431	3.03952e-05	0.00685284	-0.358
ENSG00000132376.15	INPP5K	chr17	-	1419181	1419412	1418720	1418879	1419749	1419906	3.04877e-05	0.00685284	-0.157
ENSG00000128739.16	SNRPN	chr15	+	25219533	25219603	25207260	25207356	25221451	25221563	3.04686e-05	0.00685284	0.185
ENSG00000196923.9	PDLIM7	chr5	-	176918404	176918421	176918010	176918147	176919405	176919436	3.07091e-05	0.00688834	0.252
ENSG00000196839.8	ADA	chr20	-	43254209	43254325	43251469	43251571	43257687	43257810	3.09912e-05	0.0069096	0.279
ENSG00000144218.14	AFF3	chr2	-	100728847	100728986	100720863	100720980	100745685	100745768	3.11752e-05	0.00693657	-0.052
ENSG00000184381.14	PLA2G6	chr22	-	38544499	38544630	38543374	38543482	38565224	38565474	3.12401e-05	0.00693701	-0.42
ENSG00000148690.10	FRA10AC1	chr10	-	95451765	95451850	95447160	95447206	95452402	95452486	3.17726e-05	0.00702431	-0.059
ENSG00000174564.8	IL20RB	chr3	+	136705535	136705626	136701001	136701192	136708282	136708407	3.18246e-05	0.00702431	0.288
ENSG00000197497.6	ZNF665	chr19	-	53693438	53693573	53686136	53686196	53696564	53696580	3.20177e-05	0.0070361	-0.211
ENSG00000185049.8	NELFA	chr4	-	2008724	2008926	1991434	1991596	2010476	2010575	3.20697e-05	0.0070361	-0.183
ENSG00000164050.8	PLXNB1	chr3	-	48461632	48461666	48460985	48461083	48462073	48462182	3.22328e-05	0.00704958	-0.206
ENSG00000161395.8	PGAP3	chr17	-	37830869	37830932	37829766	37830307	37840849	37841002	3.22591e-05	0.00704958	-0.054
ENSG00000005812.6	FBXL3	chr13	-	77595791	77595996	77592734	77592857	77600961	77601330	3.25664e-05	0.0070886	-0.157
ENSG00000235162.4	C12orf75	chr12	+	105759584	105759620	105742379	105742404	105760394	105760474	3.30476e-05	0.00717916	-0.222
ENSG00000162341.11	TPCN2	chr11	+	68822188	68822265	68821500	68821565	68822642	68822820	3.316e-05	0.00718939	0.077
ENSG00000169375.11	SIN3A	chr15	-	75740393	75740514	75722527	75722749	75748128	75748156	3.33617e-05	0.0072189	-0.116
ENSG00000131089.9	ARHGEF9	chrX	-	62875373	62875617	62863859	62863928	62885765	62885897	3.35839e-05	0.00725274	0.061
ENSG00000162851.6	TFB2M	chr1	-	246720682	246720836	246714514	246714604	246727647	246727736	3.4436e-05	0.00742221	0.058
ENSG00000239998.1	LILRA2	chr19	+	55085164	55085379	55084494	55084902	55086197	55086500	3.48002e-05	0.00748605	-0.201
ENSG00000178971.9	CTC1	chr17	-	8132044	8132210	8131820	8131947	8132459	8132524	3.48695e-05	0.00748633	-0.056
ENSG00000198791.7	CNOT7	chr8	-	17103365	17103440	17102544	17102756	17104031	17104118	3.49686e-05	0.00749301	0.212
ENSG00000198246.7	SLC29A3	chr10	+	73103965	73104048	73082512	73082811	73111318	73111545	3.52625e-05	0.00752669	0.114
ENSG00000197555.5	SIPA1L1	chr14	+	71867510	71867635	71787838	71787898	71979459	71979562	3.52124e-05	0.00752669	0.168
ENSG00000164535.10	DAGLB	chr7	-	6475992	6476164	6472467	6472590	6485583	6485735	3.56258e-05	0.00758954	0.067
ENSG00000140153.13	WDR20	chr14	+	102659799	102659851	102606229	102606509	102661274	102661457	3.61688e-05	0.00764606	-0.091
ENSG00000237298.4	TTN-AS1	chr2	+	179401060	179401189	179400458	179400555	179402087	179402185	3.68427e-05	0.00771449	-0.124
ENSG00000109667.7	SLC2A9	chr4	-	9892233	9892335	9836504	9836632	9909858	9909969	3.67311e-05	0.00771449	-0.084
ENSG00000164011.13	ZNF691	chr1	+	43314961	43315413	43312306	43312328	43316620	43317598	3.69494e-05	0.00771535	-0.088
ENSG00000245937.3	CTC-228N24.3	chr5	-	127417664	127417883	127301579	127302620	127418661	127418782	3.69869e-05	0.00771535	0.219
ENSG00000170638.5	TRABD	chr22	+	50635877	50636017	50632768	50632935	50636503	50636615	3.71599e-05	0.00772368	0.205
ENSG00000176809.6	LRRC37A3	chr17	-	62882203	62882284	62865212	62865284	62885798	62885870	3.71671e-05	0.00772368	0.456
ENSG00000183354.7	KIAA2026	chr9	-	5910614	5910707	5881595	5881675	5913857	5913860	3.7496e-05	0.00774045	0.154
ENSG00000058673.11	ZC3H11A	chr1	+	203770702	203770756	203764781	203764903	203786053	203786252	3.75289e-05	0.00774045	0.218
ENSG00000104870.8	FCGRT	chr19	+	50024951	50025070	50017138	50017743	50027827	50027901	3.77732e-05	0.00777626	-0.214
ENSG00000001629.5	ANKIB1	chr7	+	92019284	92019430	92017288	92017355	92020479	92020658	3.78654e-05	0.00778069	0.062
ENSG00000135749.14	PCNXL2	chr1	-	233248590	233248712	233231500	233231609	233270758	233270936	3.81663e-05	0.00782794	-0.528
ENSG00000102547.14	CAB39L	chr13	-	49975268	49975406	49956642	49957077	49975530	49975723	3.83237e-05	0.00784559	0.307
ENSG00000140694.12	PARN	chr16	-	14700340	14700383	14698002	14698083	14722028	14722108	3.85957e-05	0.00787203	-0.068
ENSG00000149182.10	ARFGAP2	chr11	-	47193214	47193351	47188310	47188437	47198066	47198185	3.85892e-05	0.00787203	0.179
ENSG00000100429.13	HDAC10	chr22	-	50687090	50687180	50686653	50686721	50687756	50687883	3.8674e-05	0.00787341	0.548
ENSG00000108352.7	RAPGEFL1	chr17	+	38337550	38337625	38334500	38334633	38337867	38337946	3.87843e-05	0.0078813	-0.325
ENSG00000258168.1	RP11-588H23.3	chr12	+	70913978	70914047	70861974	70862107	70921454	70921529	3.91855e-05	0.00793355	-0.266
ENSG00000187987.5	ZSCAN23	chr6	-	28403635	28404120	28403236	28403384	28411175	28411244	3.98563e-05	0.00805456	-0.132
ENSG00000068400.9	GRIPAP1	chrX	-	48854565	48854592	48849839	48849990	48855649	48855711	4.02169e-05	0.00807968	0.097
ENSG00000242349.1	NPPA-AS1	chr1	+	11903760	11904130	11901073	11901264	11905603	11905823	4.01494e-05	0.00807968	0.115
ENSG00000140451.8	PIF1	chr15	-	65110455	65110543	65110144	65110290	65112045	65112185	4.13116e-05	0.00827276	-0.181
ENSG00000167562.7	ZNF701	chr19	+	53075489	53075621	53073553	53073583	53077329	53077415	4.1401e-05	0.00827561	-0.054
ENSG00000074319.8	TSG101	chr11	-	18537645	18537711	18531088	18531212	18548321	18548368	4.17928e-05	0.00833261	-0.293
ENSG00000114270.11	COL7A1	chr3	-	48602541	48602634	48602215	48602413	48602842	48602929	4.18375e-05	0.00833261	-0.146
ENSG00000031691.6	CENPQ	chr6	+	49437871	49437991	49431090	49431166	49438686	49438741	4.201e-05	0.00835187	-0.081
ENSG00000181027.6	FKRP	chr19	+	47250490	47250562	47249313	47249347	47251283	47251345	4.34804e-05	0.00858224	-0.461
ENSG00000139629.11	GALNT6	chr12	-	51784633	51784721	51777244	51777366	51785070	51785174	4.34065e-05	0.00858224	-0.232
ENSG00000099917.13	MED15	chr22	+	20873164	20873282	20862343	20862731	20891403	20891470	4.36202e-05	0.00859443	-0.107
ENSG00000078967.8	UBE2D4	chr7	+	43982424	43982456	43978029	43978093	43982552	43982630	4.38795e-05	0.00861944	-0.073
ENSG00000131437.11	KIF3A	chr5	-	132042142	132042151	132039154	132039311	132046650	132046749	4.39037e-05	0.00861944	0.204
ENSG00000213468.3	RP11-453F18__B.1	chrX	-	130845678	130845748	130843525	130843584	130883333	130883486	4.41488e-05	0.00862178	-0.469
ENSG00000011304.12	PTBP1	chr19	+	805512	805569	805012	805187	808359	808452	4.41504e-05	0.00862178	-0.118
ENSG00000173065.9	FAM222B	chr17	-	27161310	27161344	27093603	27093725	27181967	27182008	4.39954e-05	0.00862178	0.178
ENSG00000100031.14	GGT1	chr22	+	25005928	25006000	25003920	25003990	25006216	25006498	4.43569e-05	0.0086315	0.077
ENSG00000211452.6	DIO1	chr1	+	54368729	54368939	54359986	54360220	54370338	54370482	4.43246e-05	0.0086315	0.342
ENSG00000239998.1	LILRA2	chr19	+	55085542	55085578	55084386	55084902	55086197	55086377	4.47048e-05	0.00868385	-0.3
ENSG00000130707.13	ASS1	chr9	+	133325658	133325720	133320378	133320585	133327610	133327720	4.48229e-05	0.00868649	-0.241
ENSG00000106070.13	GRB10	chr7	-	50778571	50778687	50772836	50773020	50793709	50793732	4.48762e-05	0.00868649	-0.201
ENSG00000165282.9	PIGO	chr9	-	35095875	35095973	35095051	35095563	35096151	35096217	4.5319e-05	0.00872632	-0.259
ENSG00000068745.10	IP6K2	chr3	-	48753864	48753910	48752747	48752960	48754589	48754648	4.5478e-05	0.00872632	-0.079
ENSG00000185920.11	PTCH1	chr9	-	98212122	98212222	98211350	98211605	98215759	98215902	4.54053e-05	0.00872632	-0.074
ENSG00000184465.11	WDR27	chr6	-	170043792	170043882	170034523	170034621	170049293	170049329	4.6249e-05	0.00885881	-0.184
ENSG00000177058.7	SLC38A9	chr5	-	54948356	54948551	54941616	54941723	54952542	54952602	4.67954e-05	0.00891695	0.062
ENSG00000154358.15	OBSCN	chr1	+	228479598	228479862	228476325	228476589	228481053	228481317	4.70077e-05	0.00893434	-0.245
ENSG00000141556.16	TBCD	chr17	+	80863811	80863929	80858417	80858607	80869633	80869641	4.70624e-05	0.00893434	-0.215
ENSG00000225205.1	AC093818.1	chr2	-	173377061	173377246	173360102	173360244	173420816	173421257	4.713e-05	0.00893434	-0.199
ENSG00000224914.2	LINC00863	chr10	+	89114376	89114654	89104193	89104252	89114847	89115182	4.74131e-05	0.00897257	0.12
ENSG00000100567.8	PSMA3	chr14	+	58737135	58737203	58724642	58724716	58738568	58738724	4.76989e-05	0.00901117	-0.368
ENSG00000178104.15	PDE4DIP	chr1	-	144837128	144837423	144836156	144836558	144837812	144837850	4.80533e-05	0.00904708	-0.3
ENSG00000220804.4	AC093642.5	chr2	+	243064437	243064606	243061115	243061208	243080934	243081039	4.82525e-05	0.00906052	-0.08
ENSG00000177058.7	SLC38A9	chr5	-	54945034	54945142	54941616	54941723	54952542	54952602	4.82892e-05	0.00906052	0.067
ENSG00000101236.12	RNF24	chr20	-	3954978	3955047	3944521	3944671	3995791	3996036	4.86983e-05	0.00906754	-0.117
ENSG00000125450.6	NUP85	chr17	+	73211848	73211918	73209170	73209214	73221197	73221332	4.89029e-05	0.00906754	-0.066
ENSG00000151881.10	C5orf28	chr5	-	43454556	43454707	43453759	43454145	43483923	43483993	4.88997e-05	0.00906754	0.122
ENSG00000105221.12	AKT2	chr19	-	40775329	40775447	40771128	40771258	40785013	40785546	4.8811e-05	0.00906754	0.25
ENSG00000126214.16	KLC1	chr14	+	104158695	104158762	104145734	104145882	104166991	104167064	4.91692e-05	0.0091016	0.07
ENSG00000157500.6	APPL1	chr3	+	57264741	57264795	57261901	57261965	57271519	57271579	4.9554e-05	0.00915744	0.242
ENSG00000168958.15	MFF	chr2	+	228207460	228207535	228205007	228205096	228211941	228211990	5.00687e-05	0.00923308	-0.117
ENSG00000146463.7	ZMYM4	chr1	+	35761527	35761589	35734633	35734686	35824525	35824830	5.0131e-05	0.00923308	0.133
ENSG00000176273.10	SLC35G1	chr10	+	95658327	95658508	95653747	95653917	95660508	95662490	5.16886e-05	0.00945669	-0.111
ENSG00000141556.16	TBCD	chr17	+	80863811	80863929	80851422	80851508	80869633	80869641	5.16417e-05	0.00945669	0.458
ENSG00000154016.9	GRAP	chr17	-	18933688	18933756	18925251	18925457	18939270	18939393	5.18562e-05	0.00946052	-0.394
ENSG00000181038.9	METTL23	chr17	+	74725771	74725876	74722911	74722961	74729374	74729459	5.18813e-05	0.00946052	0.316
ENSG00000135424.11	ITGA7	chr12	-	56094917	56094938	56094455	56094755	56096655	56096735	5.23063e-05	0.00952225	-0.089
ENSG00000160323.14	ADAMTS13	chr9	+	136303365	136303486	136302868	136303017	136304486	136304567	5.3359e-05	0.00965665	-0.227
ENSG00000177189.8	RPS6KA3	chrX	-	20258686	20258787	20252875	20252932	20259710	20259806	5.34829e-05	0.00965665	-0.118
ENSG00000223508.5	RPL23AP53	chr8	-	180803	180907	180007	180170	182128	182231	5.34753e-05	0.00965665	0.115
ENSG00000166435.11	XRRA1	chr11	-	74651829	74651927	74647928	74648113	74659972	74660065	5.32696e-05	0.00965665	0.337
ENSG00000103313.7	MEFV	chr16	-	3301956	3302049	3299430	3299780	3304157	3304790	5.3723e-05	0.00968412	0.063
ENSG00000237298.4	TTN-AS1	chr2	+	179448250	179448375	179406948	179407088	179449299	179449543	5.42975e-05	0.00972414	-0.599
ENSG00000164169.8	PRMT10	chr4	-	148563937	148564091	148560110	148560233	148575002	148575717	5.42981e-05	0.00972414	0.056
ENSG00000161647.14	MPP3	chr17	-	41898229	41898426	41895286	41895478	41901298	41901373	5.40776e-05	0.00972414	0.106
ENSG00000186654.16	PRR5	chr22	+	45127609	45127701	45122456	45122514	45132651	45132666	5.45499e-05	0.00975129	-0.123
ENSG00000089053.8	ANAPC5	chr12	-	121747772	121747814	121746159	121746494	121756079	121756411	5.46268e-05	0.00975129	0.136
ENSG00000124571.13	XPO5	chr6	-	43492568	43492706	43490071	43491743	43493576	43493659	5.48101e-05	0.00975763	-0.203
ENSG00000189011.9	AC138783.12	chr7	-	74707613	74707702	74702427	74703024	74710752	74710936	5.48395e-05	0.00975763	0.26
ENSG00000116922.10	C1orf109	chr1	-	38155887	38156110	38155309	38155558	38157701	38157914	5.49295e-05	0.00975788	0.054
ENSG00000108100.13	CCNY	chr10	+	35805450	35805551	35625801	35626135	35818900	35818958	5.52321e-05	0.0097901	-0.259
ENSG00000232995.3	RP11-267N12.3	chr1	-	163288971	163289081	163276022	163276119	163291411	163291494	5.52887e-05	0.0097901	0.07
ENSG00000068097.10	HEATR6	chr17	-	58123385	58123460	58121033	58121495	58124669	58124766	5.54459e-05	0.00980217	-0.06
ENSG00000092841.14	MYL6	chr12	+	56553406	56553514	56552467	56552495	56553808	56553932	5.63169e-05	0.00992429	-0.061
ENSG00000251136.4	RP11-37B2.1	chr8	-	90737745	90737869	90736856	90737194	90769272	90769939	5.73683e-05	0.0100934	-0.159
ENSG00000130844.12	ZNF331	chr19	+	54067016	54067046	54059098	54059162	54072557	54072639	5.77096e-05	0.0101373	0.059
ENSG00000086666.14	ZFAND6	chr15	+	80367505	80367657	80365607	80365672	80390757	80390920	5.79428e-05	0.010162	0.281
ENSG00000117016.5	RIMS3	chr1	-	41107380	41107628	41101587	41101729	41113339	41113434	5.81255e-05	0.0101779	-0.164
ENSG00000163138.14	PACRGL	chr4	+	20703348	20703507	20702082	20702410	20703763	20703819	5.87342e-05	0.0102519	-0.38
ENSG00000198208.7	RPS6KL1	chr14	-	75374137	75374233	75372345	75373827	75375552	75375635	5.88936e-05	0.0102634	-0.101
ENSG00000150455.9	TIRAP	chr11	+	126160356	126160480	126152981	126153048	126160697	126160792	6.08533e-05	0.0105445	-0.214
ENSG00000009830.7	POMT2	chr14	-	77769177	77769286	77762506	77762616	77771034	77771143	6.11433e-05	0.0105445	-0.183
ENSG00000181038.9	METTL23	chr17	+	74725771	74725876	74722921	74723295	74729374	74729459	6.09508e-05	0.0105445	-0.177
ENSG00000054523.12	KIF1B	chr1	+	10434911	10435104	10434373	10434523	10435312	10435431	6.11766e-05	0.0105445	-0.133
ENSG00000155366.12	RHOC	chr1	-	113247721	113248874	113246265	113246428	113249699	113249749	6.18271e-05	0.01064	-0.411
ENSG00000114026.17	OGG1	chr3	+	9798154	9798305	9793453	9793633	9798450	9798500	6.2784e-05	0.0107542	-0.053
ENSG00000122203.10	KIAA1191	chr5	-	175777615	175777740	175775252	175775359	175788604	175788764	6.27187e-05	0.0107542	0.051
ENSG00000074370.13	ATP2A3	chr17	-	3831533	3831621	3831274	3831332	3831956	3832074	6.30507e-05	0.0107831	-0.226
ENSG00000171202.2	TMEM126A	chr11	+	85365084	85365278	85361292	85361385	85366637	85366752	6.52295e-05	0.0110698	-0.094
ENSG00000069188.12	SDK2	chr17	-	71434102	71434293	71433877	71433961	71436950	71437062	6.67593e-05	0.0112428	-0.08
ENSG00000140455.12	USP3	chr15	+	63821212	63821365	63796810	63797029	63822696	63822789	6.66779e-05	0.0112428	0.163
ENSG00000118260.10	CREB1	chr2	+	208441354	208441417	208439995	208440178	208441833	208441924	6.6601e-05	0.0112428	0.187
ENSG00000113810.11	SMC4	chr3	+	160120463	160120655	160117430	160117537	160122165	160122292	6.7363e-05	0.0112584	-0.099
ENSG00000069998.8	CECR5	chr22	-	17623987	17624021	17619439	17619628	17640015	17640145	6.75535e-05	0.0112731	-0.202
ENSG00000135341.13	MAP3K7	chr6	-	91269794	91269933	91263176	91263305	91296482	91296602	6.78054e-05	0.0112981	0.177
ENSG00000184445.7	KNTC1	chr12	+	123086082	123086172	123078822	123078932	123087573	123087790	6.79432e-05	0.0113039	-0.182
ENSG00000128039.6	SRD5A3	chr4	+	56230240	56230438	56225512	56225655	56235998	56236142	6.84658e-05	0.0113737	-0.052
ENSG00000087884.10	AAMDC	chr11	+	77566390	77566528	77553524	77553674	77580767	77580863	6.88413e-05	0.0114188	0.057
ENSG00000261553.1	RP11-29G8.3	chr13	+	76197406	76197456	76195898	76196004	76287317	76287388	6.89761e-05	0.011424	-0.11
ENSG00000137171.10	KLC4	chr6	+	43028255	43028343	43027620	43027920	43029048	43029331	6.97857e-05	0.011505	-0.39
ENSG00000123815.7	ADCK4	chr19	-	41211000	41211086	41209273	41209527	41215963	41216041	6.97058e-05	0.011505	-0.162
ENSG00000140181.10	HERC2P2	chr15	-	23349617	23349749	23335487	23335658	23356105	23356223	6.99123e-05	0.011505	-0.085
ENSG00000108433.11	GOSR2	chr17	+	45009432	45009565	45006885	45006950	45012394	45012535	6.99678e-05	0.011505	0.099
ENSG00000143119.8	CD53	chr1	+	111437581	111437677	111434013	111434093	111440430	111440514	7.03979e-05	0.0115507	-0.217
ENSG00000196646.7	ZNF136	chr19	+	12280096	12280206	12273878	12274021	12296599	12296726	7.04754e-05	0.0115507	-0.105
ENSG00000128487.12	SPECC1	chr17	+	20200273	20200390	20163504	20163607	20209335	20209395	7.07685e-05	0.0115644	0.076
ENSG00000174851.10	YIF1A	chr11	-	66055068	66055147	66052050	66052437	66056425	66056599	7.12293e-05	0.0116224	-0.128
ENSG00000247828.3	TMEM161B-AS1	chr5	+	87583252	87583439	87566342	87566402	87732089	87732491	7.19873e-05	0.0117114	-0.121
ENSG00000132670.16	PTPRA	chr20	+	2944917	2944996	2928627	2928670	2967410	2967495	7.25048e-05	0.0117608	-0.052
ENSG00000173960.8	UBXN2A	chr2	+	24191788	24191905	24181170	24181225	24199838	24199945	7.28589e-05	0.0118009	-0.198
ENSG00000185760.11	KCNQ5	chr6	+	73787484	73787610	73787044	73787220	73821030	73821126	7.33313e-05	0.01186	0.097
ENSG00000107897.14	ACBD5	chr10	-	27509301	27509393	27508651	27508786	27512135	27512168	7.35609e-05	0.0118797	-0.059
ENSG00000005889.11	ZFX	chrX	+	24170836	24170947	24167845	24167911	24179831	24179959	7.3967e-05	0.0119277	-0.169
ENSG00000168826.11	ZBTB49	chr4	+	4314767	4314841	4304037	4304818	4322366	4322424	7.46872e-05	0.0120263	0.124
ENSG00000181790.6	BAI1	chr8	+	143560683	143560848	143559547	143559721	143561053	143561155	7.56616e-05	0.0121654	-0.18
ENSG00000126249.3	PDCD2L	chr19	+	34895834	34895895	34895288	34895443	34900065	34900415	7.5976e-05	0.0121981	0.151
ENSG00000052795.8	FNIP2	chr4	+	159782493	159782640	159780729	159780818	159782758	159782928	7.66199e-05	0.0122658	0.182
ENSG00000225177.1	RP11-390P2.4	chr6	+	139015529	139015684	139013684	139013754	139017733	139018425	7.72275e-05	0.0123423	-0.106
ENSG00000164011.13	ZNF691	chr1	+	43314961	43315084	43312296	43312328	43316620	43318148	7.80511e-05	0.0124187	-0.12
ENSG00000185515.10	BRCC3	chrX	+	154327589	154327664	154319058	154319114	154344985	154345029	7.95846e-05	0.0125735	-0.095
ENSG00000136279.14	DBNL	chr7	+	44091428	44091541	44084273	44084419	44096355	44096502	8.00874e-05	0.0126191	-0.148
ENSG00000167524.10	SGK494	chr17	-	26938160	26938271	26937015	26937717	26938561	26938674	8.06401e-05	0.0126381	-0.279
ENSG00000049541.6	RFC2	chr7	-	73657475	73657576	73653252	73653318	73664068	73664110	8.04766e-05	0.0126381	-0.088
ENSG00000060749.10	QSER1	chr11	+	32948702	32948815	32914723	32914880	32953288	32953548	8.07265e-05	0.0126381	0.081
ENSG00000138777.15	PPA2	chr4	-	106367539	106367659	106345352	106345479	106377837	106377902	8.04851e-05	0.0126381	0.106
ENSG00000250903.4	GMDS-AS1	chr6	+	2269931	2270033	2263834	2263918	2272049	2273651	8.1397e-05	0.0127163	0.143
ENSG00000134759.9	ELP2	chr18	+	33747063	33747185	33740894	33740967	33751009	33751123	8.2364e-05	0.0128491	0.153
ENSG00000117407.12	ARTN	chr1	+	44401740	44401903	44401261	44401388	44401973	44402018	8.4056e-05	0.0130945	0.122
ENSG00000166762.12	CATSPER2	chr15	-	43956615	43956741	43939546	43939665	43960225	43960316	8.43025e-05	0.0131144	-0.179
ENSG00000073331.13	ALPK1	chr4	+	113223494	113223564	113218551	113218625	113236956	113237008	8.4539e-05	0.0131231	-0.055
ENSG00000137522.13	RNF121	chr11	+	71693806	71693961	71671795	71671937	71701642	71701763	8.55657e-05	0.0132176	-0.058
ENSG00000178467.13	P4HTM	chr3	+	49042293	49042479	49039932	49040029	49044119	49044587	8.60705e-05	0.0132769	-0.096
ENSG00000197355.6	UAP1L1	chr9	+	139972501	139972706	139971952	139972273	139972953	139973129	8.78055e-05	0.0134691	0.095
ENSG00000178104.15	PDE4DIP	chr1	-	144837812	144837884	144836185	144836558	144852393	144852499	8.77755e-05	0.0134691	0.242
ENSG00000158092.2	NCK1	chr3	+	136607920	136608143	136586272	136586367	136646825	136647069	8.86214e-05	0.0135572	-0.178
ENSG00000011638.6	TMEM159	chr16	+	21172298	21172329	21170025	21170067	21172405	21172599	8.9838e-05	0.0137045	0.152
ENSG00000118495.14	PLAGL1	chr6	-	144306271	144306333	144289745	144290115	144385604	144385677	9.01332e-05	0.0137305	-0.436
ENSG00000189067.8	LITAF	chr16	-	11669261	11669442	11650366	11650591	11680741	11680775	9.03073e-05	0.0137381	-0.105
ENSG00000249859.3	PVT1	chr8	+	129094998	129095094	129082405	129082607	129108763	129108902	9.06905e-05	0.013767	-0.108
ENSG00000171302.12	CANT1	chr17	-	77001453	77001563	76996181	76996352	77005745	77005847	9.07474e-05	0.013767	0.069
ENSG00000145014.13	TMEM44	chr3	-	194338364	194338505	194337827	194337998	194343952	194344039	9.15886e-05	0.0138755	-0.084
ENSG00000161996.13	WDR90	chr16	+	703745	703803	703524	703670	705306	705468	9.21891e-05	0.0139473	0.058
ENSG00000142396.6	ERVK3-1	chr19	+	58823386	58823427	58817453	58817582	58823562	58823828	9.23843e-05	0.0139576	0.066
ENSG00000123130.12	ACOT9	chrX	-	23731251	23731325	23725833	23726061	23739997	23740101	9.26934e-05	0.0139852	0.08
ENSG00000119688.16	ABCD4	chr14	-	74764632	74764772	74763035	74763152	74766250	74766378	9.36613e-05	0.0141119	0.115
ENSG00000144134.14	RABL2A	chr2	+	114398470	114398582	114391729	114391809	114398932	114399027	9.42343e-05	0.0141788	0.397
ENSG00000163159.7	VPS72	chr1	-	151143395	151143539	151142462	151142579	151144108	151144239	9.74551e-05	0.0146208	-0.394
ENSG00000072401.10	UBE2D1	chr10	+	60121254	60121286	60121097	60121161	60123368	60123446	9.75702e-05	0.0146208	0.055
ENSG00000145014.13	TMEM44	chr3	-	194337209	194337316	194336297	194336426	194343952	194344039	9.84176e-05	0.0147277	-0.306
ENSG00000162302.8	RPS6KA4	chr11	+	64126849	64126875	64126653	64126762	64127634	64127853	9.86942e-05	0.0147491	0.054
ENSG00000146592.12	CREB5	chr7	+	28858377	28858406	28857687	28857796	28858732	28859176	9.92409e-05	0.0148107	0.089
ENSG00000169762.12	TAPT1	chr4	-	16215390	16215521	16192983	16193146	16227881	16228164	0.000100361	0.0149266	-0.111
ENSG00000078269.9	SYNJ2	chr6	+	158510870	158510979	158509691	158509804	158513957	158514136	0.000100582	0.01493	-0.126
ENSG00000089505.13	CMTM1	chr16	+	66608842	66609040	66605039	66605173	66611006	66611105	0.000101118	0.0149691	-0.476
ENSG00000186017.10	ZNF566	chr19	-	36963812	36963908	36936020	36940903	36967450	36967518	0.000101037	0.0149691	-0.073
ENSG00000140367.7	UBE2Q2	chr15	+	76170301	76170362	76165768	76165909	76175706	76175765	0.000101368	0.0149859	0.169
ENSG00000042429.6	MED17	chr11	+	93535000	93535138	93529575	93529706	93545018	93547861	0.000102171	0.0150845	-0.117
ENSG00000163975.7	MFI2	chr3	-	196754626	196754781	196753530	196753630	196756524	196756658	0.000103825	0.0153082	-0.054
ENSG00000154358.15	OBSCN	chr1	+	228444351	228444627	228437665	228437941	228451816	228452092	0.000104442	0.0153376	0.175
ENSG00000273000.1	KB-1572G7.2	chr22	-	24025911	24026054	24002051	24002187	24029024	24029182	0.000106901	0.0155596	-0.126
ENSG00000103550.9	KNOP1	chr16	-	19722693	19722762	19721581	19721908	19725439	19726359	0.000106943	0.0155596	0.074
ENSG00000168826.11	ZBTB49	chr4	+	4307864	4307911	4303715	4304818	4322366	4323513	0.000106591	0.0155596	0.221
ENSG00000154358.15	OBSCN	chr1	+	228486959	228487223	228486154	228486418	228487582	228487846	0.000106324	0.0155596	0.434
ENSG00000127415.8	IDUA	chr4	+	997336	997417	996823	996945	997799	997900	0.000108394	0.0156878	-0.143
ENSG00000234062.3	RP11-308D16.4	chrX	+	136084483	136084652	136007405	136007538	136103570	136103777	0.00011155	0.0160812	-0.19
ENSG00000142920.12	ADC	chr1	+	33549554	33549728	33546748	33547109	33558882	33559017	0.000111776	0.0160927	-0.249
ENSG00000204104.7	TRAF3IP1	chr2	+	239241464	239241536	239237566	239237983	239242600	239242676	0.00011247	0.0161593	-0.052
ENSG00000189067.8	LITAF	chr16	-	11669261	11669442	11650366	11650591	11681006	11681145	0.000113284	0.0162461	-0.15
ENSG00000198715.7	C1orf85	chr1	-	156263110	156263220	156262485	156263000	156263808	156263867	0.000113973	0.0162833	-0.059
ENSG00000084693.11	AGBL5	chr2	+	27292440	27292574	27291499	27291612	27292959	27293488	0.000113987	0.0162833	0.095
ENSG00000119684.11	MLH3	chr14	-	75508317	75508403	75505042	75505115	75513078	75513147	0.00011587	0.0165094	-0.097
ENSG00000104081.9	BMF	chr15	-	40400459	40400587	40397995	40398292	40400973	40401075	0.000116898	0.0166129	-0.119
ENSG00000154134.10	ROBO3	chr11	+	124747056	124747080	124746381	124746828	124747414	124747554	0.000117452	0.0166666	0.308
ENSG00000105948.9	TTC26	chr7	+	138831729	138832036	138827001	138827051	138845693	138845768	0.000119639	0.0168307	-0.371
ENSG00000111271.10	ACAD10	chr12	+	112167609	112167760	112165765	112165947	112174634	112174808	0.000119483	0.0168307	-0.079
ENSG00000069998.8	CECR5	chr22	-	17629337	17629450	17619439	17619628	17640015	17640167	0.000120606	0.0169215	-0.209
ENSG00000058453.12	CROCC	chr1	+	17297959	17298142	17297130	17297262	17298854	17299474	0.000120769	0.0169229	0.367
ENSG00000198561.8	CTNND1	chr11	+	57581782	57581845	57578870	57578958	57582865	57582972	0.000122538	0.0171489	-0.055
ENSG00000071462.7	WBSCR22	chr7	+	73098096	73098231	73097930	73098003	73100965	73101061	0.000124446	0.0173499	-0.14
ENSG00000249859.3	PVT1	chr8	+	129060693	129060855	129001429	129001537	129082405	129082518	0.000124339	0.0173499	0.19
ENSG00000135503.8	ACVR1B	chr12	+	52377782	52377950	52370110	52370359	52385646	52385777	0.000125566	0.0174839	0.224
ENSG00000169016.12	E2F6	chr2	-	11595467	11595600	11593707	11593848	11597304	11597359	0.000126759	0.0175832	-0.205
ENSG00000106100.6	NOD1	chr7	-	30515463	30515604	30503224	30503314	30518221	30518344	0.000126662	0.0175832	-0.163
ENSG00000104164.6	BLOC1S6	chr15	+	45890077	45890194	45879550	45879723	45893431	45893605	0.000126519	0.0175832	0.131
ENSG00000143224.13	PPOX	chr1	+	161138782	161138973	161136889	161137024	161140409	161140559	0.000127675	0.0176436	-0.073
ENSG00000143498.13	TAF1A	chr1	-	222757469	222757639	222753100	222753214	222761784	222761907	0.000127635	0.0176436	-0.057
ENSG00000124006.10	OBSL1	chr2	-	220422905	220423181	220422544	220422832	220423946	220424153	0.000127495	0.0176436	0.202
ENSG00000152433.10	ZNF547	chr19	+	57882340	57882462	57879911	57879947	57883149	57883276	0.000130836	0.0179973	-0.084
ENSG00000176473.9	WDR25	chr14	+	100847246	100848083	100842769	100842841	100934357	100934505	0.000130563	0.0179973	0.103
ENSG00000172113.4	NME6	chr3	-	48337608	48337726	48336013	48336293	48338216	48338319	0.000130851	0.0179973	0.363
ENSG00000113971.14	NPHP3	chr3	-	132403397	132403638	132402242	132402368	132405103	132405231	0.000131678	0.0180609	-0.067
ENSG00000149262.12	INTS4	chr11	-	77622015	77622198	77618762	77618856	77629076	77629310	0.000132093	0.0180884	-0.164
ENSG00000171428.9	NAT1	chr8	+	18069899	18070283	18068701	18068851	18076919	18076998	0.000132207	0.0180884	-0.067
ENSG00000109381.15	ELF2	chr4	-	140060566	140060651	140046317	140046483	140098120	140098353	0.000133572	0.0182218	-0.084
ENSG00000167733.9	HSD11B1L	chr19	+	5686426	5686538	5684829	5684916	5686910	5687002	0.000133678	0.0182218	0.098
ENSG00000122085.12	MTERFD2	chr2	-	242035807	242035853	242033691	242033847	242038810	242038841	0.000134552	0.0183182	-0.51
ENSG00000010310.4	GIPR	chr19	+	46177331	46177435	46176108	46176212	46177939	46178084	0.000135231	0.0183879	-0.069
ENSG00000127980.11	PEX1	chr7	-	92131203	92131393	92130820	92130987	92132354	92132509	0.000135777	0.0184166	-0.126
ENSG00000198089.10	SFI1	chr22	+	32000294	32000390	31998197	31998279	32000854	32000931	0.000136601	0.0185057	0.1
ENSG00000237298.4	TTN-AS1	chr2	+	179401605	179401955	179401060	179401189	179402087	179402185	0.000138464	0.0187351	0.079
ENSG00000203778.3	FAM229B	chr6	+	112418243	112418404	112408801	112408923	112420472	112420611	0.000138848	0.018749	-0.213
ENSG00000240498.2	CDKN2B-AS1	chr9	+	22046315	22046448	22032672	22032985	22046749	22046899	0.000139589	0.018749	-0.135
ENSG00000160190.9	SLC37A1	chr21	+	43934979	43935045	43934633	43934827	43938386	43938620	0.000139534	0.018749	-0.117
ENSG00000143119.8	CD53	chr1	+	111440430	111440514	111434966	111435155	111441745	111442198	0.000139579	0.018749	0.052
ENSG00000214013.5	GANC	chr15	+	42573114	42573331	42570679	42570788	42579888	42580016	0.000139353	0.018749	0.079
ENSG00000049192.10	ADAMTS6	chr5	-	64747301	64747447	64629868	64629912	64747959	64748043	0.000139323	0.018749	0.212
ENSG00000151883.12	PARP8	chr5	+	49962918	49963020	49961732	49961903	50045984	50046022	0.00014072	0.0188593	-0.073
ENSG00000161813.16	LARP4	chr12	+	50796457	50796596	50794975	50795064	50821544	50821692	0.000141224	0.0188995	-0.28
ENSG00000185158.8	LRRC37B	chr17	+	30354787	30354859	30351729	30351801	30357674	30357746	0.0001418	0.0189536	0.108
ENSG00000082397.11	EPB41L3	chr18	-	5394675	5394792	5392382	5393477	5395065	5395146	0.000142394	0.0189868	0.082
ENSG00000159753.9	RLTPR	chr16	+	67690703	67690784	67690326	67690548	67691141	67691219	0.000142638	0.0189964	-0.198
ENSG00000074964.12	ARHGEF10L	chr1	+	17975048	17975170	17966696	17966797	17981130	17981160	0.000143084	0.0190327	0.08
ENSG00000050426.11	LETMD1	chr12	+	51447560	51447643	51445870	51445990	51449926	51450028	0.0001451	0.0191665	-0.079
ENSG00000163138.14	PACRGL	chr4	+	20703380	20703507	20702293	20702410	20703763	20703844	0.000149107	0.0194607	-0.337
ENSG00000178252.13	WDR6	chr3	+	49046359	49046457	49044785	49044964	49048853	49049139	0.000148721	0.0194607	-0.176
ENSG00000160767.16	FAM189B	chr1	-	155223649	155223769	155222539	155223523	155224190	155224247	0.000149128	0.0194607	0.051
ENSG00000258659.2	TRIM34	chr11	+	5664046	5664083	5663635	5663736	5664373	5665039	0.000148943	0.0194607	0.453
ENSG00000173065.9	FAM222B	chr17	-	27117395	27117443	27093603	27093725	27181967	27182250	0.000150036	0.019556	0.226
ENSG00000141556.16	TBCD	chr17	+	80861280	80861354	80851422	80851508	80869633	80869641	0.000152083	0.019776	0.342
ENSG00000157036.8	EXOG	chr3	+	38539119	38539269	38537762	38538021	38542845	38542985	0.000152479	0.0198041	0.167
ENSG00000088992.13	TESC	chr12	-	117484363	117484471	117476761	117477015	117486823	117486963	0.000154119	0.0199471	0.145
ENSG00000064687.8	ABCA7	chr19	+	1057312	1057428	1056328	1056498	1058144	1058268	0.000154126	0.0199471	0.213
ENSG00000267419.1	CTC-559E9.6	chr19	+	19900488	19900630	19897417	19897500	19917089	19917185	0.000155979	0.0201164	0.174
ENSG00000258168.1	RP11-588H23.3	chr12	+	70916303	70916410	70861859	70862107	70921454	70921518	0.000156558	0.0201674	-0.22
ENSG00000165006.9	UBAP1	chr9	+	34203378	34203533	34196333	34196456	34220905	34220946	0.000156976	0.0201686	-0.394
ENSG00000169762.12	TAPT1	chr4	-	16204084	16204203	16192983	16193146	16227881	16228094	0.000157116	0.0201686	-0.076
ENSG00000115042.5	FAHD2A	chr2	+	96071300	96071551	96068473	96068620	96078181	96078290	0.000156817	0.0201686	-0.051
ENSG00000181722.11	ZBTB20	chr3	-	114069120	114070725	114056940	114058273	114099063	114099251	0.000157547	0.0201768	-0.151
ENSG00000101194.13	SLC17A9	chr20	+	61594624	61594721	61593975	61594106	61595579	61595667	0.000157966	0.0201836	-0.064
ENSG00000033800.9	PIAS1	chr15	+	68353735	68353787	68349817	68349918	68378643	68379088	0.000157825	0.0201836	0.204
ENSG00000226752.3	PSMD5-AS1	chr9	+	123607270	123607474	123606990	123607177	123609571	123609631	0.000159406	0.0202735	-0.09
ENSG00000161996.13	WDR90	chr16	+	712672	712844	712219	712331	715678	715801	0.00016118	0.0204518	-0.079
ENSG00000116815.11	CD58	chr1	-	117061852	117061924	117057360	117057444	117064527	117064605	0.000162347	0.0205732	-0.079
ENSG00000247828.3	TMEM161B-AS1	chr5	+	87581557	87581668	87578826	87578903	87583252	87583473	0.00016251	0.0205732	0.109
ENSG00000189298.9	ZKSCAN3	chr6	+	28327301	28327765	28318048	28318165	28329100	28329248	0.00016289	0.020574	-0.062
ENSG00000141582.10	CBX4	chr17	-	77809444	77809495	77808842	77809194	77811635	77811701	0.000162834	0.020574	0.063
ENSG00000188070.8	C11orf95	chr11	-	63531509	63532070	63527363	63531341	63532339	63532726	0.000163574	0.0206131	0.116
ENSG00000249471.3	ZNF324B	chr19	+	58964553	58964633	58963494	58964149	58965062	58965189	0.000164383	0.0206677	0.09
ENSG00000128973.7	CLN6	chr15	-	68503600	68503656	68499329	68500748	68510873	68510988	0.000164893	0.0206846	0.598
ENSG00000114107.4	CEP70	chr3	-	138291700	138291756	138290107	138290198	138310695	138310798	0.000165099	0.020687	0.063
ENSG00000178104.15	PDE4DIP	chr1	-	144857611	144857728	144856815	144857042	144863317	144863442	0.000166662	0.0207413	-0.178
ENSG00000132359.9	RAP1GAP2	chr17	+	2908662	2908734	2901514	2901670	2909248	2909335	0.000166619	0.0207413	-0.057
ENSG00000176728.3	TTTY14	chrY	-	21230609	21230684	21207127	21207177	21238930	21239281	0.000167377	0.0208067	0.331
ENSG00000263766.1	RP11-580I16.2	chr17	-	45703912	45703993	45699207	45699453	45713877	45713967	0.000167786	0.0208106	-0.226
ENSG00000074582.8	BCS1L	chr2	+	219525029	219525205	219524439	219524466	219526481	219526676	0.000167714	0.0208106	0.163
ENSG00000030419.12	IKZF2	chr2	-	213878514	213878658	213864428	213872808	213886716	213886854	0.0001697	0.0210182	-0.075
ENSG00000161800.8	RACGAP1	chr12	-	50414844	50414960	50410413	50410498	50419110	50419246	0.000171465	0.0211953	0.124
ENSG00000143951.11	WDPCP	chr2	-	63380629	63380709	63380048	63380080	63401804	63401967	0.000172331	0.0212286	-0.216
ENSG00000136869.13	TLR4	chr9	+	120470840	120471007	120466649	120466843	120474666	120478053	0.000173441	0.0213198	-0.147
ENSG00000105397.9	TYK2	chr19	-	10480432	10480553	10478839	10478878	10488889	10489102	0.0001738	0.0213401	-0.169
ENSG00000151693.5	ASAP2	chr2	+	9484859	9484929	9484660	9484764	9490936	9491024	0.00017444	0.0213949	0.148
ENSG00000100767.11	PAPLN	chr14	+	73727416	73727537	73725976	73726253	73727863	73728002	0.00017593	0.0215298	-0.192
ENSG00000088305.14	DNMT3B	chr20	+	31380431	31380576	31379406	31379514	31383214	31383340	0.000176288	0.0215495	-0.051
ENSG00000176024.12	ZNF613	chr19	+	52432984	52433149	52430472	52430793	52439280	52439488	0.000177117	0.0216269	0.073
ENSG00000163870.10	TPRA1	chr3	-	127298582	127298715	127295458	127295539	127309252	127309435	0.000178227	0.0216796	-0.127
ENSG00000125826.15	RBCK1	chr20	+	397863	397986	389334	389423	398169	398263	0.000178681	0.0216796	0.135
ENSG00000106603.13	COA1	chr7	-	43705256	43705321	43688198	43688251	43750998	43751048	0.000178729	0.0216796	0.254
ENSG00000071462.7	WBSCR22	chr7	+	73098096	73098330	73097955	73098003	73100965	73101061	0.000180512	0.0218237	-0.169
ENSG00000172986.8	GXYLT2	chr3	+	73004248	73004500	72971354	72971486	73006379	73006503	0.000180825	0.0218376	0.092
ENSG00000143224.13	PPOX	chr1	+	161137160	161137276	161136889	161137024	161140409	161140559	0.000182457	0.0219384	-0.07
ENSG00000161996.13	WDR90	chr16	+	712678	712844	712219	712331	715678	715801	0.000182886	0.0219661	-0.117
ENSG00000165275.5	TRMT10B	chr9	+	37762539	37762682	37761899	37762114	37763625	37763754	0.000183538	0.0219965	-0.083
ENSG00000111540.11	RAB5B	chr12	+	56379383	56379507	56373155	56373258	56380652	56380876	0.000184125	0.0220188	-0.18
ENSG00000105676.9	ARMC6	chr19	+	19144939	19145047	19144720	19144822	19153524	19153686	0.000184027	0.0220188	-0.081
ENSG00000163867.12	ZMYM6	chr1	-	35496147	35496357	35485983	35486068	35497415	35497569	0.000185331	0.0220924	0.055
ENSG00000158691.10	ZSCAN12	chr6	-	28365780	28366250	28360678	28360823	28367433	28367508	0.000186058	0.022106	0.088
ENSG00000151276.19	MAGI1	chr3	-	65433696	65433732	65428466	65428524	65438932	65439015	0.000185925	0.022106	0.277
ENSG00000160392.9	C19orf47	chr19	-	40847692	40847797	40842226	40842314	40854230	40854293	0.000186952	0.0221882	-0.097
ENSG00000198431.11	TXNRD1	chr12	+	104683243	104683320	104682672	104682818	104684770	104684882	0.00018724	0.0221985	-0.111
ENSG00000169241.13	SLC50A1	chr1	+	155109303	155109427	155108774	155108872	155110454	155110574	0.000187569	0.0222136	-0.14
ENSG00000156858.7	PRR14	chr16	+	30662313	30662448	30662098	30662127	30663116	30663285	0.000188826	0.0223385	-0.119
ENSG00000161800.8	RACGAP1	chr12	-	50412298	50412372	50410413	50410498	50419155	50419218	0.000189133	0.0223476	-0.462
ENSG00000127419.12	TMEM175	chr4	+	941496	941680	926174	926328	944208	944306	0.000189634	0.022362	0.133
ENSG00000186918.9	ZNF395	chr8	-	28232778	28232899	28217111	28217341	28243520	28243655	0.000190582	0.0224498	-0.214
ENSG00000154582.12	TCEB1	chr8	-	74881794	74881908	74868145	74868289	74884311	74884467	0.00019142	0.0225244	-0.241
ENSG00000259972.1	AC009120.6	chr16	-	74340152	74340319	74339153	74339478	74366464	74366511	0.000193385	0.0226829	0.166
ENSG00000082074.11	FYB	chr5	-	39212779	39213119	39202875	39203089	39219544	39219665	0.000193747	0.0226849	0.132
ENSG00000149600.7	COMMD7	chr20	-	31292241	31292291	31290504	31291873	31294384	31294422	0.000194066	0.0226903	-0.062
ENSG00000105483.12	CARD8	chr19	-	48745796	48745901	48744218	48744320	48759048	48759128	0.000194325	0.0226965	-0.111
ENSG00000179532.8	DNHD1	chr11	+	6559612	6559740	6555153	6555459	6559841	6560040	0.000194857	0.0227106	-0.148
ENSG00000106603.13	COA1	chr7	-	43695631	43695752	43688198	43688251	43750998	43751048	0.000194858	0.0227106	0.139
ENSG00000185219.11	ZNF445	chr3	-	44492805	44492974	44492359	44492454	44496612	44497188	0.000195323	0.0227406	-0.087
ENSG00000144445.11	KANSL1L	chr2	-	210940275	210940480	210908156	210908828	210962809	210962931	0.000196373	0.0227917	-0.051
ENSG00000144559.6	TAMM41	chr3	-	11872195	11872348	11871229	11871338	11874476	11874625	0.000196488	0.0227917	0.152
ENSG00000172113.4	NME6	chr3	-	48337608	48337648	48334753	48336293	48338216	48338319	0.000196589	0.0227917	0.182
ENSG00000149636.11	DSN1	chr20	-	35399827	35399876	35399275	35399596	35401796	35402154	0.000200086	0.0231484	-0.054
ENSG00000064687.8	ABCA7	chr19	+	1058144	1058268	1057038	1057428	1058616	1058746	0.000200653	0.0231653	-0.08
ENSG00000107863.12	ARHGAP21	chr10	-	24879134	24879408	24878199	24878231	24880153	24880259	0.000200983	0.0231791	-0.066
ENSG00000135124.10	P2RX4	chr12	+	121654936	121655084	121647659	121648101	121659715	121659787	0.000201384	0.0232011	0.066
ENSG00000172766.14	NAA16	chr13	+	41910785	41910892	41905409	41905505	41929279	41929352	0.000204958	0.0235171	-0.073
ENSG00000104093.9	DMXL2	chr15	-	51757762	51757848	51755272	51755693	51758380	51758508	0.000204981	0.0235171	-0.059
ENSG00000144560.9	VGLL4	chr3	-	11712735	11712868	11643306	11643496	11744444	11744521	0.000205423	0.0235433	0.187
ENSG00000150076.18	C10orf68	chr10	+	32871961	32872235	32860786	32860821	32873159	32873232	0.0002062	0.0236078	0.109
ENSG00000171777.11	RASGRP4	chr19	-	38905487	38905763	38904033	38904114	38907691	38907787	0.000206999	0.0236746	-0.103
ENSG00000169884.9	WNT10B	chr12	-	49362892	49362927	49359338	49360336	49363871	49364134	0.000207253	0.0236791	0.058
ENSG00000186166.4	CCDC84	chr11	+	118882858	118882964	118882648	118882713	118885703	118885793	0.000209348	0.0238442	-0.071
ENSG00000183576.8	SETD3	chr14	-	99880212	99880271	99872852	99872927	99924615	99924872	0.000213832	0.0242296	0.051
ENSG00000159063.8	ALG8	chr11	-	77820487	77820627	77815401	77815499	77830227	77830295	0.000214678	0.0243005	-0.097
ENSG00000112759.12	SLC29A1	chr6	+	44189322	44189422	44187372	44187519	44194999	44195079	0.000215107	0.0243241	0.053
ENSG00000115464.10	USP34	chr2	-	61430274	61430398	61420035	61420115	61431631	61431736	0.000217327	0.0245248	-0.104
ENSG00000055609.13	KMT2C	chr7	-	151854845	151855010	151853289	151853359	151855947	151856157	0.000218353	0.0245854	0.067
ENSG00000149182.10	ARFGAP2	chr11	-	47196732	47196864	47188310	47188437	47198066	47198185	0.000218848	0.0245854	0.123
ENSG00000156398.8	SFXN2	chr10	+	104475990	104476086	104474392	104474438	104476370	104476468	0.000218568	0.0245854	0.174
ENSG00000166323.8	C11orf65	chr11	-	108276155	108276286	108263934	108264105	108332205	108332295	0.000219422	0.0245854	0.221
ENSG00000137101.8	CD72	chr9	-	35618738	35618862	35618010	35618118	35646399	35646807	0.000219303	0.0245854	0.366
ENSG00000069943.5	PIGB	chr15	+	55642896	55643001	55633935	55634000	55646995	55647176	0.000220805	0.0246646	0.112
ENSG00000103064.9	SLC7A6	chr16	+	68321648	68321774	68308593	68308779	68328607	68328704	0.000220455	0.0246646	0.276
ENSG00000198185.7	ZNF334	chr20	-	45134945	45135097	45133252	45133379	45141178	45142198	0.000221362	0.0246904	0.212
ENSG00000245281.2	CTD-2547L16.1	chr8	+	17942750	17942994	17942376	17942448	17944391	17944445	0.000222122	0.0247364	-0.385
ENSG00000189144.9	ZNF573	chr19	-	38231541	38231611	38230806	38231095	38249686	38249779	0.000225127	0.0249701	0.338
ENSG00000091436.12	MLTK	chr2	+	174103100	174103163	174081842	174081978	174123426	174123543	0.000227907	0.025253	0.5
ENSG00000025796.9	SEC63	chr6	-	108277168	108277310	108250618	108250718	108278425	108278544	0.000228294	0.0252704	0.441
ENSG00000183621.11	ZNF438	chr10	-	31212215	31212344	31165926	31165994	31230503	31230580	0.000228747	0.0252951	-0.237
ENSG00000100731.11	PCNX	chr14	+	71462457	71462642	71443658	71445365	71479716	71479919	0.000230227	0.025357	-0.162
ENSG00000042429.6	MED17	chr11	+	93540683	93540801	93529575	93529706	93545018	93545394	0.000232722	0.0255393	-0.219
ENSG00000176024.12	ZNF613	chr19	+	52432984	52433077	52430399	52430793	52439280	52439378	0.000232637	0.0255393	0.155
ENSG00000197136.4	PCNXL3	chr11	+	65387007	65387131	65385410	65386538	65387809	65387900	0.000233102	0.0255393	0.159
ENSG00000183207.8	RUVBL2	chr19	+	49510274	49510404	49506535	49506591	49513032	49513128	0.000233274	0.0255393	0.168
ENSG00000099998.13	GGT5	chr22	-	24622043	24622234	24621513	24621620	24622598	24622735	0.000234128	0.0255451	-0.131
ENSG00000113296.10	THBS4	chr5	+	79370087	79370246	79369094	79369150	79371026	79371193	0.000233784	0.0255451	-0.123
ENSG00000171502.10	COL24A1	chr1	-	86372876	86372930	86362038	86362092	86374280	86374334	0.000234297	0.0255451	-0.057
ENSG00000126746.13	ZNF384	chr12	-	6787828	6787876	6787292	6787509	6788111	6788349	0.000234486	0.0255451	0.215
ENSG00000105552.10	BCAT2	chr19	-	49310256	49310331	49303443	49303554	49314065	49314173	0.000236802	0.0257719	0.163
ENSG00000196262.9	PPIA	chr7	+	44838990	44839079	44836278	44836392	44840885	44841223	0.000241246	0.0262037	-0.115
ENSG00000175029.12	CTBP2	chr10	-	126822080	126822181	126691906	126692061	126847203	126847285	0.000242633	0.0262508	-0.354
ENSG00000087470.13	DNM1L	chr12	+	32890798	32890876	32890038	32890095	32891197	32891230	0.000242274	0.0262508	0.077
ENSG00000240498.2	CDKN2B-AS1	chr9	+	22056250	22056386	22049104	22049227	22097256	22097363	0.000242448	0.0262508	0.099
ENSG00000105339.6	DENND3	chr8	+	142170730	142170886	142161717	142161936	142175284	142175388	0.000243302	0.0262717	0.061
ENSG00000198453.8	ZNF568	chr19	+	37422454	37422547	37408480	37408550	37427647	37427726	0.000243917	0.0263122	-0.428
ENSG00000140743.3	CDR2	chr16	-	22433481	22433535	22361021	22361170	22441116	22441269	0.000244172	0.0263139	-0.271
ENSG00000138002.10	IFT172	chr2	-	27708226	27708370	27706738	27706804	27712481	27712545	0.0002463	0.0264656	0.053
ENSG00000213918.6	DNASE1	chr16	+	3712646	3712805	3707720	3707868	3713487	3713727	0.000249341	0.0267142	0.224
ENSG00000175029.12	CTBP2	chr10	-	126776759	126776888	126692032	126692061	126847203	126847285	0.000250538	0.0267384	-0.367
ENSG00000153094.17	BCL2L11	chr2	+	111918995	111919127	111911356	111911481	111921709	111921808	0.000250438	0.0267384	-0.105
ENSG00000166938.8	DIS3L	chr15	+	66599234	66599290	66587325	66587479	66601046	66601182	0.000250099	0.0267384	-0.088
ENSG00000148120.10	C9orf3	chr9	+	97844856	97845001	97842975	97843062	97848963	97849200	0.000253038	0.0269009	-0.2
ENSG00000001460.13	STPG1	chr1	-	24718050	24718169	24710356	24710493	24727808	24727821	0.000252946	0.0269009	0.173
ENSG00000152380.5	FAM151B	chr5	+	79790871	79791102	79783804	79783967	79801761	79801895	0.000253681	0.0269173	-0.319
ENSG00000086758.11	HUWE1	chrX	-	53713214	53713313	53707001	53707139	53713532	53713673	0.000253449	0.0269173	0.074
ENSG00000036549.8	ZZZ3	chr1	-	78107068	78107131	78097534	78099090	78107206	78107340	0.000257437	0.0271589	0.053
ENSG00000174796.8	THAP6	chr4	+	76465068	76465169	76441981	76442189	76467618	76467696	0.000259069	0.0272008	-0.126
ENSG00000270011.2	ZNF177	chr19	+	9451777	9451860	9435370	9435456	9486991	9487099	0.00025939	0.0272085	-0.165
ENSG00000109066.9	TMEM104	chr17	+	72773716	72773877	72772637	72772716	72784927	72785009	0.000260038	0.0272505	-0.466
ENSG00000163159.7	VPS72	chr1	-	151143395	151143539	151142462	151142579	151150476	151150621	0.000261344	0.0273614	-0.263
ENSG00000175061.13	C17orf76-AS1	chr17	+	16366480	16366631	16344387	16344444	16373615	16373664	0.00026243	0.0274229	-0.5
ENSG00000186918.9	ZNF395	chr8	-	28232778	28232899	28218401	28218699	28242596	28242914	0.000264541	0.0275912	0.461
ENSG00000231365.1	RP11-418J17.1	chr1	+	119804069	119804339	119693187	119693369	119805524	119805567	0.00026809	0.0278558	0.358
ENSG00000198040.6	ZNF84	chr12	+	133615460	133615598	133614088	133614131	133617863	133618068	0.000273306	0.0283176	0.286
ENSG00000244625.1	CTA-211A9.5	chr22	+	27089643	27089799	27068729	27068950	27122606	27122757	0.000273775	0.0283395	-0.056
ENSG00000140987.15	ZSCAN32	chr16	-	3443648	3443814	3440009	3440133	3447191	3447194	0.000275596	0.0285013	0.126
ENSG00000187118.8	CMC1	chr3	+	28339709	28339841	28338591	28338652	28357823	28357914	0.000276194	0.0285248	-0.244
ENSG00000067066.12	SP100	chr2	+	231363175	231363250	231359130	231359175	231367780	231367825	0.000276342	0.0285248	0.057
ENSG00000213047.7	DENND1B	chr1	-	197704715	197704926	197684160	197684204	197741997	197742062	0.000277801	0.0286486	-0.074
ENSG00000110881.7	ASIC1	chr12	+	50470750	50470843	50453669	50453737	50470995	50471146	0.000278572	0.0286745	-0.157
ENSG00000131002.7	TXLNG2P	chrY	+	21764101	21764197	21761624	21761717	21765682	21765937	0.000281239	0.0289219	0.053
ENSG00000204120.10	GIGYF2	chr2	+	233587263	233587368	233562014	233562102	233599864	233599947	0.000282251	0.0289815	0.084
ENSG00000117407.12	ARTN	chr1	+	44401764	44401903	44401030	44401388	44401973	44402479	0.000283005	0.0290223	0.152
ENSG00000007341.14	ST7L	chr1	-	113124613	113124728	113120966	113121039	113124996	113125094	0.000284656	0.0290637	-0.054
ENSG00000127989.9	MTERF	chr7	-	91506191	91506292	91456728	91456794	91509368	91509427	0.000289212	0.0293851	0.318
ENSG00000126091.15	ST3GAL3	chr1	+	44344698	44344903	44303890	44303983	44345006	44345179	0.000290918	0.0295312	0.075
ENSG00000138386.12	NAB1	chr2	+	191520702	191520879	191514571	191514708	191523883	191524088	0.000292088	0.0295955	-0.17
ENSG00000196155.8	PLEKHG4	chr16	+	67322378	67322507	67322069	67322303	67322705	67322975	0.000291881	0.0295955	-0.067
ENSG00000223546.2	LINC00630	chrX	+	102100784	102100948	102094728	102094791	102119969	102120080	0.00029556	0.0298409	-0.161
ENSG00000146350.9	TBC1D32	chr6	-	121576473	121576556	121563346	121563485	121600266	121600391	0.000295167	0.0298409	0.134
ENSG00000167384.6	ZNF180	chr19	-	44988860	44988987	44988571	44988646	45000608	45000726	0.000294793	0.0298409	0.264
ENSG00000175309.10	PHYKPL	chr5	-	177649852	177649935	177641796	177641886	177656940	177657074	0.000298605	0.0300622	0.237
ENSG00000142632.12	ARHGEF19	chr1	-	16525644	16525749	16524348	16525239	16531253	16531414	0.00029951	0.0301169	-0.07
ENSG00000035115.17	SH3YL1	chr2	-	242797	242871	239560	242176	247537	247602	0.00030018	0.0301382	-0.154
ENSG00000196074.8	SYCP2	chr20	-	58443467	58443623	58442765	58442902	58443889	58443980	0.000300748	0.0301676	-0.279
ENSG00000188559.9	RALGAPA2	chr20	-	20377338	20377378	20373410	20373897	20392670	20392792	0.000301459	0.0302115	-0.057
ENSG00000104164.6	BLOC1S6	chr15	+	45895297	45895385	45879433	45879723	45897625	45897668	0.000302533	0.0302915	-0.083
ENSG00000153391.11	INO80C	chr18	-	33067349	33067787	33060419	33060527	33069295	33069349	0.000308056	0.0305893	-0.163
ENSG00000166938.8	DIS3L	chr15	+	66599099	66599290	66587325	66587479	66601046	66601182	0.000308285	0.0305893	-0.056
ENSG00000244754.4	N4BP2L2	chr13	-	33096318	33096407	33092011	33092140	33109905	33110006	0.000308145	0.0305893	0.292
ENSG00000115677.12	HDLBP	chr2	-	242208620	242208710	242208368	242208520	242212175	242212248	0.000310968	0.0308278	0.361
ENSG00000171811.8	TTC40	chr10	-	134730052	134730186	134726549	134726762	134733562	134733686	0.000311665	0.0308414	-0.129
ENSG00000183765.16	CHEK2	chr22	-	29120552	29120911	29115382	29115473	29121230	29121355	0.000312523	0.0308986	0.142
ENSG00000089012.10	SIRPG	chr20	-	1616833	1617151	1610867	1610952	1629697	1630054	0.000313771	0.0309941	-0.259
ENSG00000170946.10	DNAJC24	chr11	+	31451029	31451153	31447833	31447902	31451817	31452250	0.000315761	0.0311349	-0.052
ENSG00000109667.7	SLC2A9	chr4	-	9889190	9889266	9836504	9836632	9909858	9909969	0.000316951	0.0312242	-0.075
ENSG00000261777.1	RP11-529K1.2	chr16	-	70375842	70376002	70367685	70367863	70380101	70380650	0.000320704	0.0315375	0.167
ENSG00000136048.9	DRAM1	chr12	+	102313886	102313979	102307951	102308010	102314993	102315320	0.000321199	0.031558	-0.075
ENSG00000161996.13	WDR90	chr16	+	712672	713064	712219	712331	715678	715801	0.00032216	0.0316242	-0.081
ENSG00000235944.3	ZNF815P	chr7	+	5879579	5879706	5862790	5863157	5880320	5880487	0.000322734	0.0316242	0.096
ENSG00000142192.16	APP	chr21	-	27369674	27369731	27354656	27354790	27372329	27372497	0.000324695	0.0317599	-0.051
ENSG00000169379.11	ARL13B	chr3	+	93722502	93722752	93714717	93714788	93754174	93754280	0.000325526	0.0318129	-0.057
ENSG00000157353.12	FUK	chr16	+	70501276	70501374	70500784	70500857	70502751	70502871	0.000327326	0.031887	-0.118
ENSG00000197548.8	ATG7	chr3	+	11322679	11322788	11314128	11314395	11340159	11340329	0.000327211	0.031887	0.107
ENSG00000166762.12	CATSPER2	chr15	-	43941924	43942077	43939617	43939665	43960225	43960316	0.000328186	0.031903	-0.242
ENSG00000062524.11	LTK	chr15	-	41799759	41799855	41799292	41799488	41800266	41800419	0.000328056	0.031903	-0.069
ENSG00000178467.13	P4HTM	chr3	+	49041530	49041693	49039932	49040029	49044119	49044548	0.00033087	0.032079	-0.075
ENSG00000115137.7	DNAJC27	chr2	-	25176418	25176504	25174262	25174423	25179911	25180034	0.000332511	0.0320913	-0.38
ENSG00000196535.10	MYO18A	chr17	-	27452910	27452985	27449183	27449271	27467357	27467440	0.000332417	0.0320913	-0.072
ENSG00000183207.8	RUVBL2	chr19	+	49507463	49507675	49506535	49506591	49513032	49513139	0.000331854	0.0320913	0.124
ENSG00000255571.2	LINC00925	chr15	+	89931734	89931812	89931047	89931112	89932575	89932713	0.000333155	0.0321027	0.216
ENSG00000115935.12	WIPF1	chr2	-	175462328	175462586	175450250	175450339	175499245	175499333	0.000333463	0.0321043	0.09
ENSG00000151208.12	DLG5	chr10	-	79604968	79605195	79603204	79603464	79613111	79613295	0.000335266	0.0322464	-0.057
ENSG00000152601.13	MBNL1	chr3	+	152052899	152053019	151987237	151987567	152132729	152132898	0.000337803	0.032437	-0.075
ENSG00000244625.1	CTA-211A9.5	chr22	+	27113215	27113422	27068767	27068950	27122606	27122757	0.000338355	0.0324617	-0.058
ENSG00000170919.11	TPT1-AS1	chr13	+	45926031	45926149	45918439	45918581	45951195	45951350	0.000339703	0.0324779	-0.376
ENSG00000213064.5	SFT2D2	chr1	+	168204338	168204420	168200751	168200838	168205949	168206008	0.00033982	0.0324779	0.073
ENSG00000070501.7	POLB	chr8	+	42196529	42196587	42195972	42196203	42202470	42202537	0.000339997	0.0324779	0.142
ENSG00000167491.13	GATAD2A	chr19	+	19605102	19605192	19576148	19576423	19609251	19609531	0.000339309	0.0324779	0.226
ENSG00000164953.11	TMEM67	chr8	+	94768005	94768136	94767247	94767365	94770710	94770804	0.000340772	0.0324955	0.152
ENSG00000206559.3	ZCWPW2	chr3	+	28557044	28557112	28555554	28555613	28562482	28562607	0.000342877	0.0326621	0.406
ENSG00000245937.3	CTC-228N24.3	chr5	-	127396835	127396936	127301579	127302620	127418661	127418720	0.000344361	0.0327244	0.054
ENSG00000173818.12	ENDOV	chr17	+	78395627	78395762	78389252	78389621	78396005	78396042	0.000344297	0.0327244	0.066
ENSG00000006327.9	TNFRSF12A	chr16	+	3071189	3071320	3070368	3070492	3071555	3071690	0.000344758	0.0327339	-0.106
ENSG00000214922.5	HLA-F-AS1	chr6	-	29713249	29713504	29706327	29706663	29714924	29715202	0.000346969	0.0328871	-0.166
ENSG00000137522.13	RNF121	chr11	+	71698049	71698157	71671795	71671937	71701642	71701709	0.000347871	0.0329442	-0.095
ENSG00000078124.7	ACER3	chr11	+	76668508	76668630	76637600	76637711	76670120	76670244	0.000350319	0.0331191	0.242
ENSG00000125629.10	INSIG2	chr2	+	118864665	118864765	118864234	118864479	118865856	118865948	0.000351712	0.0331939	0.055
ENSG00000239665.4	RP11-295P9.3	chr10	+	13694845	13694882	13690084	13690230	13696352	13696427	0.000352478	0.0332376	0.111
ENSG00000126249.3	PDCD2L	chr19	+	34895553	34895895	34895329	34895443	34900065	34900415	0.000355102	0.0333993	0.053
ENSG00000128573.18	FOXP2	chr7	+	114269646	114269697	114268594	114268732	114269859	114270060	0.00035817	0.0336591	-0.053
ENSG00000260456.2	C16orf95	chr16	-	87343902	87343939	87339324	87339511	87348576	87348702	0.000358888	0.0336978	0.068
ENSG00000171604.7	CXXC5	chr5	+	139045164	139045388	139026883	139027020	139059431	139059525	0.000360372	0.0337796	-0.245
ENSG00000101928.8	MOSPD1	chrX	-	134033119	134033195	134030843	134031064	134033309	134033564	0.000360066	0.0337796	0.073
ENSG00000177189.8	RPS6KA3	chrX	-	20258686	20258723	20252875	20252932	20259710	20259806	0.000361673	0.0338667	-0.132
ENSG00000125458.2	NT5C	chr17	-	73127059	73127176	73126322	73126737	73127275	73127376	0.000362937	0.0339334	0.236
ENSG00000196428.8	TSC22D2	chr3	+	150140835	150140907	150126121	150129095	150174862	150174914	0.000365769	0.034138	-0.052
ENSG00000240498.2	CDKN2B-AS1	chr9	+	22096370	22096513	22049104	22049227	22097256	22097363	0.000366055	0.034138	0.283
ENSG00000124177.10	CHD6	chr20	-	40116304	40116448	40112991	40113247	40117067	40117244	0.000367512	0.034187	-0.063
ENSG00000102878.11	HSF4	chr16	+	67203181	67203251	67202938	67203004	67203533	67203684	0.00036706	0.034187	0.14
ENSG00000143847.11	PPFIA4	chr1	+	203029344	203029545	203028897	203028979	203032955	203033131	0.000370187	0.0343488	-0.31
ENSG00000175175.4	PPM1E	chr17	+	57043054	57043254	57033009	57033128	57046899	57047088	0.000371139	0.0343792	-0.108
ENSG00000172594.8	SMPDL3A	chr6	+	123122454	123122551	123117968	123118113	123124808	123124978	0.000371027	0.0343792	0.235
ENSG00000090554.8	FLT3LG	chr19	+	49983808	49983877	49983554	49983733	49989271	49989286	0.000372586	0.0344261	-0.052
ENSG00000143178.8	TBX19	chr1	+	168274245	168274434	168269659	168269721	168277979	168278115	0.000373657	0.0344363	0.198
ENSG00000106603.13	COA1	chr7	-	43696814	43696868	43695631	43695752	43705256	43705321	0.000374355	0.0344454	0.134
ENSG00000173542.4	MOB1B	chr4	+	71808539	71808599	71768042	71768267	71816416	71816528	0.000377533	0.0346221	0.201
ENSG00000144741.13	SLC25A26	chr3	+	66413283	66413353	66313755	66313803	66419901	66419966	0.000380533	0.0348392	-0.094
ENSG00000106723.12	SPIN1	chr9	+	91031558	91031681	91030521	91030614	91041296	91041506	0.000381494	0.0348692	-0.361
ENSG00000127616.13	SMARCA4	chr19	+	11094155	11094387	11091452	11091528	11094796	11095049	0.000381367	0.0348692	-0.234
ENSG00000213930.7	GALT	chr9	+	34647488	34647702	34647085	34647255	34648111	34648168	0.000382253	0.0348807	-0.065
ENSG00000100532.7	CGRRF1	chr14	+	54989867	54989963	54989171	54989311	54996766	54996944	0.000382243	0.0348807	0.076
ENSG00000153551.9	CMTM7	chr3	+	32493557	32493965	32490945	32491044	32495732	32495850	0.000383566	0.0349715	0.082
ENSG00000163006.7	CCDC138	chr2	+	109463193	109463386	109432396	109432561	109489906	109490045	0.000386381	0.0351699	-0.097
ENSG00000119725.13	ZNF410	chr14	+	74354975	74355067	74353561	74353630	74358729	74358911	0.000387869	0.0352763	0.1
ENSG00000160767.16	FAM189B	chr1	-	155223874	155223985	155222539	155223523	155224190	155224247	0.000389723	0.0354156	0.083
ENSG00000168970.16	JMJD7-PLA2G4B	chr15	+	42126937	42127091	42120292	42120386	42127167	42127421	0.000391287	0.0354992	0.07
ENSG00000139323.9	POC1B	chr12	-	89861393	89861462	89860449	89860699	89885712	89885892	0.00039259	0.0355769	0.052
ENSG00000169057.15	MECP2	chrX	-	153323849	153324017	153305242	153305354	153363060	153363120	0.000394222	0.0356773	-0.268
ENSG00000127419.12	TMEM175	chr4	+	941496	941942	926262	926328	944208	944279	0.000394764	0.035697	0.146
ENSG00000003400.10	CASP10	chr2	+	202068452	202068489	202060564	202060671	202073792	202074285	0.000400136	0.0360939	0.168
ENSG00000109618.7	SEPSECS	chr4	-	25161249	25161386	25160574	25160729	25161877	25162016	0.000403956	0.0363788	0.07
ENSG00000154328.11	NEIL2	chr8	+	11628954	11629099	11627682	11627844	11637106	11637459	0.000406687	0.0365897	-0.097
ENSG00000188917.10	TRMT2B	chrX	-	100297221	100297301	100291962	100292062	100306772	100307071	0.000406962	0.0365897	-0.079
ENSG00000006025.7	OSBPL7	chr17	-	45897094	45897148	45896351	45896465	45897336	45897462	0.000412327	0.0370117	0.078
ENSG00000155465.14	SLC7A7	chr14	-	23243562	23243712	23243141	23243325	23244652	23244749	0.000412769	0.0370212	0.117
ENSG00000114738.6	MAPKAPK3	chr3	+	50650278	50650373	50648950	50649168	50654944	50655215	0.000416412	0.0372182	-0.427
ENSG00000122507.16	BBS9	chr7	+	33390830	33390935	33388679	33388782	33392470	33392485	0.000416722	0.0372182	-0.109
ENSG00000099968.13	BCL2L13	chr22	+	18178906	18178976	18165979	18166087	18185008	18185152	0.000416212	0.0372182	0.062
ENSG00000119943.6	PYROXD2	chr10	-	100148110	100148265	100146957	100147064	100150354	100150511	0.000417332	0.0372182	0.095
ENSG00000078699.17	CBFA2T2	chr20	+	32211578	32211660	32210920	32211102	32212569	32212823	0.000420801	0.0374367	-0.08
ENSG00000126581.8	BECN1	chr17	-	40965965	40966026	40962325	40962946	40967925	40968013	0.000420745	0.0374367	-0.067
ENSG00000170919.11	TPT1-AS1	chr13	+	45926031	45926149	45918439	45918581	45934275	45934374	0.000421806	0.0374958	-0.235
ENSG00000077454.11	LRCH4	chr7	-	100174895	100175012	100174316	100174628	100175286	100175363	0.000424231	0.0376506	0.287
ENSG00000188917.10	TRMT2B	chrX	-	100296305	100296360	100291962	100292062	100306772	100307071	0.000426154	0.0377558	-0.177
ENSG00000158864.8	NDUFS2	chr1	+	161182879	161182972	161182381	161182444	161183169	161183265	0.000426788	0.0377558	-0.101
ENSG00000186318.12	BACE1	chr11	-	117164586	117164724	117163769	117163904	117165846	117166063	0.000426288	0.0377558	-0.053
ENSG00000136161.8	RCBTB2	chr13	-	49096033	49096098	49089721	49089877	49098794	49098893	0.00042675	0.0377558	0.297
ENSG00000186654.16	PRR5	chr22	+	45127614	45127701	45122456	45122514	45132651	45133321	0.000427784	0.0378136	-0.528
ENSG00000114988.7	LMAN2L	chr2	-	97402873	97402954	97400145	97400263	97403685	97403804	0.000428338	0.0378322	0.057
ENSG00000121310.12	ECHDC2	chr1	-	53383215	53383287	53379091	53379767	53387224	53387457	0.000429102	0.0378468	0.092
ENSG00000188917.10	TRMT2B	chrX	-	100306239	100306355	100297030	100297301	100306632	100306722	0.000430622	0.0379426	-0.18
ENSG00000137210.9	TMEM14B	chr6	+	10770309	10770437	10751365	10751467	10829239	10829398	0.000431113	0.0379555	0.217
ENSG00000163681.10	SLMAP	chr3	+	57850533	57850584	57850274	57850443	57850968	57851019	0.000432724	0.0380366	-0.085
ENSG00000150347.10	ARID5B	chr10	+	63759849	63760080	63699941	63700167	63810646	63810759	0.000435783	0.0382213	-0.178
ENSG00000046647.9	GEMIN8	chrX	-	14044170	14044340	14039582	14039630	14047895	14048011	0.000436729	0.038236	-0.128
ENSG00000204120.10	GIGYF2	chr2	+	233589283	233589401	233587263	233587368	233599864	233599947	0.000436716	0.038236	-0.076
ENSG00000137876.5	RSL24D1	chr15	-	55487501	55487789	55486493	55486557	55489007	55489265	0.000437721	0.0382924	0.119
ENSG00000064933.12	PMS1	chr2	+	190670377	190670480	190656515	190656667	190708689	190708806	0.000438695	0.038319	-0.13
ENSG00000067208.10	EVI5	chr1	-	93142714	93142775	93101758	93101893	93201954	93202184	0.000439068	0.038319	0.324
ENSG00000170190.11	SLC16A5	chr17	+	73085245	73085399	73083821	73083991	73089683	73089930	0.000440833	0.0384121	-0.067
ENSG00000105982.12	RNF32	chr7	+	156436494	156436586	156433442	156433649	156437192	156437233	0.000441614	0.0384498	-0.159
ENSG00000233672.2	RNASEH2B-AS1	chr13	-	51463744	51463871	51456513	51456781	51478856	51478999	0.00044319	0.0384956	-0.122
ENSG00000138658.11	C4orf21	chr4	-	113468440	113468564	113462247	113462424	113474990	113475138	0.000442497	0.0384956	0.051
ENSG00000122481.12	RWDD3	chr1	+	95712097	95712213	95709766	95710271	95712311	95712773	0.000442972	0.0384956	0.096
ENSG00000101333.12	PLCB4	chr20	+	9440281	9440457	9438060	9438136	9449217	9449319	0.000445552	0.0386095	-0.1
ENSG00000100731.11	PCNX	chr14	+	71462457	71462560	71443658	71445365	71479716	71479919	0.00044755	0.0387217	-0.217
ENSG00000114670.9	NEK11	chr3	+	130887673	130887781	130884120	130884363	130889616	130889731	0.000450133	0.0388841	0.316
ENSG00000165801.5	ARHGEF40	chr14	+	21543803	21543924	21543490	21543658	21544518	21544615	0.000450602	0.0388941	-0.069
ENSG00000116957.8	TBCE	chr1	+	235582731	235582876	235577747	235577933	235590454	235590554	0.00045342	0.0390761	0.059
ENSG00000126214.16	KLC1	chr14	+	104151322	104151373	104145645	104145855	104151974	104152039	0.000453851	0.0390826	0.091
ENSG00000158234.8	FAIM	chr3	+	138329445	138329879	138327447	138327779	138340248	138340381	0.000454761	0.0391203	0.071
ENSG00000140374.11	ETFA	chr15	-	76602272	76602405	76584959	76585041	76603690	76603784	0.000458402	0.0393514	0.069
ENSG00000198185.7	ZNF334	chr20	-	45140720	45140779	45133252	45133379	45141178	45142198	0.000458227	0.0393514	0.103
ENSG00000138468.11	SENP7	chr3	-	101219913	101219963	101212716	101212812	101231934	101232028	0.000460056	0.039432	0.082
ENSG00000105662.11	CRTC1	chr19	+	18885709	18885796	18879294	18879603	18886450	18886631	0.000461913	0.0395296	-0.06
ENSG00000164733.16	CTSB	chr8	-	11718914	11718988	11710837	11710988	11724762	11725202	0.000461674	0.0395296	0.359
ENSG00000140105.13	WARS	chr14	-	100841619	100841687	100828044	100828258	100841847	100842588	0.000463204	0.0395617	-0.462
ENSG00000095794.15	CREM	chr10	+	35477127	35477316	35437295	35437419	35495822	35495934	0.000464443	0.0395617	0.116
ENSG00000049192.10	ADAMTS6	chr5	-	64558643	64558789	64556426	64556490	64569166	64569274	0.000463761	0.0395617	0.536
ENSG00000121964.10	GTDC1	chr2	-	144934701	144934807	144903138	144903306	144936401	144936527	0.000464833	0.0395643	-0.299
ENSG00000105865.6	DUS4L	chr7	+	107205032	107205121	107204424	107204504	107207494	107207631	0.000466472	0.0396426	0.069
ENSG00000123200.12	ZC3H13	chr13	-	46626066	46626124	46594583	46594692	46626538	46626820	0.000467468	0.0396966	-0.118
ENSG00000168255.14	POLR2J3	chr7	-	102207028	102207183	102181947	102182109	102207443	102207530	0.00046904	0.0397994	0.076
ENSG00000189050.10	RNFT1	chr17	-	58037428	58037529	58035651	58035805	58040187	58040327	0.000471367	0.0399457	0.138
ENSG00000138641.11	HERC3	chr4	+	89585303	89585363	89579565	89579642	89588527	89588639	0.00047337	0.0400145	-0.09
ENSG00000162062.10	C16orf59	chr16	+	2510283	2510382	2510080	2510171	2510623	2510694	0.000473392	0.0400145	0.146
ENSG00000258588.2	TRIM6-TRIM34	chr11	+	5664046	5664073	5663635	5663736	5664373	5665623	0.00047491	0.0400601	0.108
ENSG00000136643.7	RPS6KC1	chr1	+	213349742	213349835	213341200	213341316	213403839	213403887	0.000475557	0.0400745	0.169
ENSG00000011143.12	MKS1	chr17	-	56292101	56292259	56291166	56291230	56293448	56293604	0.000477969	0.040247	0.415
ENSG00000153832.7	FBXO36	chr2	+	230797486	230797602	230787017	230787325	230840956	230841065	0.000480688	0.0403841	-0.178
ENSG00000132535.14	DLG4	chr17	-	7095211	7095321	7094585	7094677	7096801	7096903	0.000484972	0.0407121	-0.107
ENSG00000264769.1	RP11-498C9.12	chr17	+	79881954	79882090	79880774	79881108	79882294	79882387	0.000490871	0.0411134	-0.546
ENSG00000115325.9	DOK1	chr2	+	74781920	74781986	74776197	74776299	74782280	74782514	0.000494614	0.0413397	-0.361
ENSG00000144677.10	CTDSPL	chr3	+	37998601	37998634	37988547	37988702	38006061	38006163	0.000495601	0.0413523	0.316
ENSG00000122203.10	KIAA1191	chr5	-	175786813	175786921	175775252	175775359	175788604	175788738	0.000496123	0.0413645	0.064
ENSG00000128573.18	FOXP2	chr7	+	114269646	114269697	114268594	114268732	114269919	114270060	0.000496693	0.0413807	-0.389
ENSG00000117616.13	C1orf63	chr1	-	25570944	25570989	25570040	25570715	25571640	25571792	0.000498481	0.0414983	-0.143
ENSG00000137500.5	CCDC90B	chr11	-	82996169	82996254	82985681	82985783	82996595	82997394	0.000505396	0.0418852	0.183
ENSG00000175279.17	APITD1	chr1	+	10494713	10494747	10490158	10490625	10511433	10512210	0.000506464	0.041941	0.178
ENSG00000166801.11	FAM111A	chr11	+	58910969	58913329	58910555	58910777	58916308	58916426	0.000507897	0.0420234	-0.08
ENSG00000147854.12	UHRF2	chr9	+	6495584	6497103	6493825	6493932	6497197	6497360	0.000508223	0.0420234	-0.061
ENSG00000145390.7	USP53	chr4	+	120160372	120161058	120138704	120138828	120166491	120166584	0.000511243	0.042164	-0.224
ENSG00000175265.13	GOLGA8A	chr15	-	34727583	34727672	34699724	34699936	34729598	34729667	0.00051084	0.042164	-0.104
ENSG00000082074.11	FYB	chr5	-	39208965	39209066	39203057	39203089	39212779	39213119	0.000511454	0.042164	0.155
ENSG00000134138.15	MEIS2	chr15	-	37388489	37388631	37387764	37387815	37390167	37390400	0.000515022	0.0424263	0.082
ENSG00000105701.11	FKBP8	chr19	-	18650180	18650269	18644079	18644157	18652488	18652805	0.000523453	0.0427056	-0.146
ENSG00000134470.15	IL15RA	chr10	-	6008107	6008302	6002329	6002530	6019739	6020001	0.000522172	0.0427056	-0.105
ENSG00000213047.7	DENND1B	chr1	-	197621364	197621445	197586788	197586889	197641166	197641286	0.000521878	0.0427056	-0.092
ENSG00000169398.15	PTK2	chr8	-	141994176	141994254	141900641	141900868	142011223	142011295	0.000521384	0.0427056	0.074
ENSG00000179818.9	PCBP1-AS1	chr2	-	70304432	70304513	70282748	70283042	70310669	70310819	0.000520978	0.0427056	0.382
ENSG00000126247.6	CAPNS1	chr19	+	36631259	36631413	36631011	36631059	36631901	36632122	0.000525435	0.0428356	-0.236
ENSG00000230590.3	FTX	chrX	-	73504577	73504783	73501536	73501683	73511592	73511910	0.000526601	0.0428672	-0.2
ENSG00000141298.13	SSH2	chr17	-	28175866	28175947	28120633	28120955	28256955	28257111	0.000528628	0.0430004	0.099
ENSG00000196597.7	ZNF782	chr9	-	99607171	99607298	99589361	99589463	99616369	99616642	0.000532477	0.0432177	0.204
ENSG00000166169.12	POLL	chr10	-	103343264	103343438	103340004	103340173	103344634	103344676	0.000537537	0.0435963	0.115
ENSG00000131368.3	MRPS25	chr3	-	15094886	15094974	15090718	15091442	15106567	15106767	0.000538284	0.0436248	-0.314
ENSG00000070010.14	UFD1L	chr22	-	19462590	19462623	19454925	19455526	19466605	19466695	0.000539112	0.0436597	-0.103
ENSG00000089050.10	RBBP9	chr20	-	18476481	18476524	18474601	18474707	18477712	18477887	0.000540152	0.0436797	-0.061
ENSG00000156313.8	RPGR	chrX	-	38150645	38150737	38150211	38150277	38156536	38156705	0.000541074	0.0437222	-0.051
ENSG00000131323.10	TRAF3	chr14	+	103357661	103357754	103342694	103342862	103369591	103369766	0.000543377	0.043843	0.226
ENSG00000198911.7	SREBF2	chr22	+	42287253	42287403	42282272	42282312	42289120	42289289	0.000543763	0.043843	0.344
ENSG00000242715.3	CCDC169	chr13	-	36857605	36857646	36854193	36855397	36857728	36857839	0.000544341	0.0438574	-0.228
ENSG00000175662.13	TOM1L2	chr17	-	17787947	17788082	17782940	17783057	17801909	17801988	0.000545977	0.0438929	-0.197
ENSG00000115274.10	INO80B	chr2	+	74686769	74686872	74683229	74683399	74687347	74687973	0.000549195	0.0440873	0.288
ENSG00000130813.13	C19orf66	chr19	+	10202259	10202306	10201925	10202029	10202745	10203001	0.000551371	0.0441976	-0.057
ENSG00000125648.10	SLC25A23	chr19	-	6438201	6438323	6436089	6436475	6438457	6438545	0.000551159	0.0441976	0.405
ENSG00000111832.8	RWDD1	chr6	+	116894020	116894148	116893584	116893641	116901457	116901523	0.000553391	0.044295	0.426
ENSG00000100614.13	PPM1A	chr14	+	60743722	60743809	60716377	60716395	60752341	60752459	0.000555304	0.0443947	0.365
ENSG00000145362.12	ANK2	chr4	+	114274200	114280455	114271383	114271405	114281978	114282053	0.00055774	0.044546	-0.38
ENSG00000115307.12	AUP1	chr2	-	74755543	74755616	74755066	74755133	74756488	74756626	0.000559695	0.0446563	-0.316
ENSG00000130449.5	ZSWIM6	chr5	+	60768507	60768864	60628099	60628775	60786612	60786761	0.000560173	0.0446563	-0.058
ENSG00000186654.16	PRR5	chr22	+	45128130	45128271	45122456	45122514	45132651	45133542	0.000569476	0.0452536	-0.258
ENSG00000114544.11	SLC41A3	chr3	-	125769740	125769893	125752449	125752521	125786789	125787089	0.00057476	0.0455093	-0.14
ENSG00000164074.10	C4orf29	chr4	+	128910875	128910976	128905493	128905578	128930074	128930112	0.000576166	0.0455879	0.078
ENSG00000138316.6	ADAMTS14	chr10	+	72434311	72434751	72432558	72432640	72462067	72462224	0.000576834	0.045608	0.224
ENSG00000265479.1	DTX2P1-UPK3BP1-PMS2P11	chr7	+	76648225	76648314	76644988	76645172	76652910	76653078	0.000578354	0.0456953	-0.223
ENSG00000230189.2	GS1-124K5.2	chr7	-	65941245	65941314	65915057	65915223	65943995	65944083	0.0005842	0.0461242	0.255
ENSG00000126581.8	BECN1	chr17	-	40967688	40967790	40962877	40962946	40967925	40968013	0.000588415	0.0463156	-0.144
ENSG00000114999.7	TTL	chr2	+	113243493	113243572	113239730	113240078	113251719	113251952	0.000587512	0.0463156	-0.086
ENSG00000114316.8	USP4	chr3	-	49348946	49349087	49343147	49343321	49355741	49356207	0.000589147	0.0463156	0.103
ENSG00000087302.4	C14orf166	chr14	+	52470957	52470960	52468515	52468584	52471079	52471371	0.00058904	0.0463156	0.109
ENSG00000061938.12	TNK2	chr3	-	195609315	195609398	195605953	195606046	195610027	195610180	0.00059096	0.0464249	-0.193
ENSG00000247498.5	RP11-392P7.6	chr12	+	13119692	13119831	13080697	13080737	13132364	13132556	0.00060253	0.0472328	-0.267
ENSG00000124588.15	NQO2	chr6	+	3003902	3004023	3002283	3002520	3006701	3006793	0.000611684	0.0478822	-0.114
ENSG00000166024.9	R3HCC1L	chr10	+	99922639	99922732	99915849	99915904	99923049	99923154	0.000614501	0.0480302	0.07
ENSG00000141376.16	BCAS3	chr17	+	59465978	59466069	59457866	59457932	59469337	59469634	0.000614484	0.0480302	0.107
ENSG00000170190.11	SLC16A5	chr17	+	73085208	73085399	73083828	73083991	73089683	73089891	0.000617337	0.0481195	-0.065
ENSG00000153310.14	FAM49B	chr8	-	130961211	130961313	130924715	130924761	130983188	130983241	0.000620051	0.0482627	0.12
ENSG00000109685.13	WHSC1	chr4	+	1900947	1901122	1895456	1895636	1902352	1902978	0.000621687	0.0483119	-0.063
ENSG00000183137.10	CEP57L1	chr6	+	109427237	109427293	109421394	109421489	109461623	109461878	0.000627513	0.0485359	-0.284
ENSG00000196476.7	C20orf96	chr20	-	257433	257520	251503	251908	257684	257786	0.000628113	0.0485359	0.162
ENSG00000084693.11	AGBL5	chr2	+	27291915	27291962	27291499	27291612	27292959	27293490	0.000626845	0.0485359	0.324
ENSG00000178202.8	KDELC2	chr11	-	108351906	108352103	108348333	108348438	108356883	108357167	0.000629693	0.0485671	0.108
ENSG00000071462.7	WBSCR22	chr7	+	73098096	73098253	73097898	73098003	73100965	73101061	0.000631798	0.0486953	-0.14
ENSG00000089682.12	RBM41	chrX	-	106331665	106332069	106312484	106312632	106358581	106358786	0.000632556	0.0487196	0.063
ENSG00000131650.9	KREMEN2	chr16	+	3017526	3017605	3017320	3017446	3017810	3018380	0.000634702	0.0487609	-0.206
ENSG00000022277.8	RTFDC1	chr20	+	55045655	55045997	55043713	55043822	55046669	55046725	0.000634862	0.0487609	-0.119
ENSG00000157193.10	LRP8	chr1	-	53742363	53742750	53741302	53741425	53755238	53755361	0.000634016	0.0487609	-0.096
ENSG00000166169.12	POLL	chr10	-	103344358	103344477	103340004	103340173	103344634	103344676	0.000634768	0.0487609	0.212
ENSG00000196476.7	C20orf96	chr20	-	256608	256727	251503	251908	257684	257786	0.000638213	0.0489841	0.062
ENSG00000161091.8	MFSD12	chr19	-	3567142	3567240	3550985	3551192	3573553	3573627	0.000640601	0.0491331	0.163
ENSG00000174227.11	PIGG	chr4	+	501193	501382	494184	494390	509761	509974	0.000643375	0.0492856	-0.057
ENSG00000174799.6	CEP135	chr4	+	56840911	56841135	56837435	56837574	56846308	56846461	0.000644988	0.0493545	0.054
ENSG00000144306.9	SCRN3	chr2	+	175262063	175262132	175260522	175261021	175263002	175263170	0.000646503	0.0494137	-0.431
ENSG00000135549.10	PKIB	chr6	+	123022584	123022645	122996222	122996289	123038931	123039108	0.000648346	0.0495203	-0.248
ENSG00000101638.9	ST8SIA5	chr18	-	44284534	44284627	44271412	44272218	44336340	44337132	0.00065185	0.0497189	0.199
ENSG00000115234.6	SNX17	chr2	+	27595489	27595607	27593502	27593673	27595906	27595980	0.00065368	0.0497896	-0.073
ENSG00000146776.10	ATXN7L1	chr7	-	105429049	105429154	105305512	105305735	105516257	105516326	0.000656554	0.0499414	0.095
ENSG00000171163.11	ZNF692	chr1	-	249150571	249150621	249149756	249150145	249150712	249150761	0.000656581	0.0499414	0.103

## Sheet: DMSO L22KO vs NT MXE
GeneID	geneSymbol	chr	strand	1stExonStart_0base	1stExonEnd	2ndExonStart_0base	2ndExonEnd	upstreamES	upstreamEE	downstreamES	downstreamEE	PValue	FDR	IncLevelDifference
ENSG00000116251.5	RPL22	chr1	-	6252989	6253114	6257711	6257816	6245079	6246876	6259621	6259672	0	0	-0.427
ENSG00000116251.5	RPL22	chr1	-	6252989	6253114	6257711	6257816	6246674	6246876	6260548	6260902	0	0	-0.373
ENSG00000181790.6	BAI1	chr8	+	143604001	143604071	143605598	143605665	143602183	143602286	143607902	143607988	1.42333e-10	1.14739e-06	0.431
ENSG00000149179.9	C11orf49	chr11	+	47013093	47013198	47044889	47044945	47008758	47008861	47073938	47074069	3.75814e-09	2.10806e-05	-0.678
ENSG00000142002.12	DPP9	chr19	-	4715540	4715738	4719214	4719336	4714092	4714349	4719862	4719953	4.35837e-09	2.10806e-05	0.352
ENSG00000167733.9	HSD11B1L	chr19	+	5684999	5685130	5686426	5686538	5684829	5684916	5686910	5687002	5.17194e-08	0.000192907	-0.322
ENSG00000178795.5	GDPD4	chr11	-	76982339	76982438	76987205	76987265	76982174	76982268	76990350	76990444	5.58363e-08	0.000192907	0.619
ENSG00000141736.9	ERBB2	chr17	+	37880978	37881164	37881301	37881457	37880164	37880263	37881579	37881655	7.63164e-08	0.000214276	-0.571
ENSG00000112078.9	KCTD20	chr6	+	36442565	36442839	36446897	36447000	36437828	36438034	36452490	36452601	7.97421e-08	0.000214276	0.062
ENSG00000138658.11	C4orf21	chr4	-	113507600	113507739	113508435	113509085	113506696	113506881	113527163	113527247	1.05504e-07	0.000250687	-0.086
ENSG00000198625.8	MDM4	chr1	+	204499811	204499945	204501318	204501374	204495487	204495562	204507336	204507436	1.14024e-07	0.000250687	-0.084
ENSG00000112078.9	KCTD20	chr6	+	36442565	36442839	36446897	36447000	36437828	36438034	36449338	36449536	1.67192e-07	0.000336949	0.061
ENSG00000138071.9	ACTR2	chr2	+	65469182	65469197	65473318	65473441	65466985	65467096	65473657	65473873	7.3908e-07	0.000945738	-0.314
ENSG00000181704.7	YIPF6	chrX	+	67731690	67731819	67733168	67733247	67718890	67718999	67738611	67738654	6.83636e-07	0.000945738	-0.083
ENSG00000187741.10	FANCA	chr16	-	89805536	89805697	89805885	89805961	89805151	89805382	89806401	89806507	7.90335e-07	0.000945738	-0.079
ENSG00000112078.9	KCTD20	chr6	+	36446897	36447000	36452490	36452601	36437828	36438034	36454659	36455183	6.50307e-07	0.000945738	-0.062
ENSG00000107099.11	DOCK8	chr9	+	276993	277086	284374	284567	271626	271729	286460	286636	7.32575e-07	0.000945738	0.185
ENSG00000117262.14	GPR89A	chr1	-	145822813	145822859	145826387	145826715	145818766	145818826	145826887	145827015	7.4327e-07	0.000945738	0.292
ENSG00000184497.8	TMEM255B	chr13	+	114472070	114472133	114498120	114498210	114469087	114469230	114502311	114502392	7.85956e-07	0.000945738	0.543
ENSG00000153391.11	INO80C	chr18	-	33067349	33067403	33069295	33069349	33060416	33060527	33077682	33077907	1.47251e-06	0.00161869	0.308
ENSG00000188917.10	TRMT2B	chrX	-	100296305	100296360	100297030	100297301	100292905	100293040	100306632	100306722	1.8509e-06	0.00179049	0.118
ENSG00000145014.13	TMEM44	chr3	-	194337209	194337316	194337498	194337620	194336297	194336426	194343952	194344039	1.77814e-06	0.00179049	0.441
ENSG00000179532.8	DNHD1	chr11	+	6565350	6565476	6565803	6565901	6561105	6561313	6566106	6568896	2.07908e-06	0.00193386	-0.243
ENSG00000025423.7	HSD17B6	chr12	+	57156987	57157198	57175757	57176016	57146236	57146365	57178636	57178800	3.32734e-06	0.00287387	0.228
ENSG00000173818.12	ENDOV	chr17	+	78399258	78399420	78402395	78402460	78398831	78398900	78403572	78403631	4.27575e-06	0.00325525	-0.092
ENSG00000111215.7	PRR4	chr12	-	11126253	11126320	11199618	11199787	11035659	11035695	11324020	11324143	4.04954e-06	0.00325525	-0.074
ENSG00000101040.15	ZMYND8	chr20	-	45867501	45867882	45874751	45875261	45865069	45865260	45891031	45891172	4.30731e-06	0.00325525	0.093
ENSG00000113558.14	SKP1	chr5	-	133506641	133506729	133509391	133509457	133502860	133502934	133509616	133509713	3.95079e-06	0.00325525	0.517
ENSG00000154134.10	ROBO3	chr11	+	124747056	124747080	124747180	124747205	124746737	124746828	124747414	124747554	4.81781e-06	0.00353073	0.443
ENSG00000117640.13	MTFR1L	chr1	+	26149728	26149814	26149836	26149930	26149509	26149619	26150134	26150239	4.9672e-06	0.00353314	-0.19
ENSG00000101017.9	CD40	chr20	+	44751764	44751858	44755278	44755340	44751248	44751395	44756776	44756863	6.4339e-06	0.00416079	-0.61
ENSG00000100150.12	DEPDC5	chr22	+	32293467	32293639	32297727	32297788	32289567	32289737	32301969	32302052	6.23686e-06	0.00416079	-0.157
ENSG00000186409.10	CCDC30	chr1	+	42938792	42938974	42946131	42946237	42929024	42929328	42948333	42948487	6.64621e-06	0.00416079	0.196
ENSG00000167733.9	HSD11B1L	chr19	+	5685003	5685130	5686426	5686538	5684829	5684916	5686910	5687002	7.62388e-06	0.00449697	-0.265
ENSG00000148737.11	TCF7L2	chr10	+	114724314	114724383	114799783	114799885	114711241	114711366	114900942	114901075	7.47291e-06	0.00449697	-0.195
ENSG00000188706.8	ZDHHC9	chrX	-	128962956	128963117	128975754	128975932	128957654	128957813	128977671	128977885	8.30286e-06	0.00466968	0.054
ENSG00000104093.9	DMXL2	chr15	-	51755575	51755693	51757762	51757848	51750905	51750992	51758380	51758508	9.17268e-06	0.00475387	-0.071
ENSG00000162298.12	SYVN1	chr11	-	64897200	64897387	64897473	64897644	64896143	64896262	64897722	64897761	8.8785e-06	0.00475387	0.059
ENSG00000188428.12	BLOC1S5	chr6	-	8026599	8026658	8041371	8041501	8015295	8016061	8054502	8054605	9.23884e-06	0.00475387	0.125
ENSG00000118495.14	PLAGL1	chr6	-	144269121	144269597	144285923	144287367	144261436	144263800	144290043	144290115	1.01392e-05	0.00504398	0.095
ENSG00000240498.2	CDKN2B-AS1	chr9	+	22056250	22056386	22097256	22097363	22049104	22049227	22118642	22118766	1.02198e-05	0.00504398	0.109
ENSG00000168038.6	ULK4	chr3	-	41795852	41795980	41831152	41831335	41759219	41759353	41841623	41841785	1.10483e-05	0.00534384	-0.155
ENSG00000178795.5	GDPD4	chr11	-	76944069	76944217	76969430	76969587	76940194	76940277	76979501	76979584	1.2331e-05	0.00573484	-0.371
ENSG00000116171.12	SCP2	chr1	+	53413680	53413752	53416426	53416558	53407467	53407525	53420411	53420476	1.26204e-05	0.00575869	0.439
ENSG00000023839.6	ABCC2	chr10	+	101569890	101569975	101572774	101572901	101567839	101567986	101577064	101577241	1.63984e-05	0.00721053	-0.21
ENSG00000068137.10	PLEKHH3	chr17	-	40825193	40825314	40825416	40825574	40824103	40824230	40825660	40825852	1.83372e-05	0.00791907	0.151
ENSG00000092841.14	MYL6	chr12	+	56552467	56552495	56553370	56553406	56552140	56552188	56553808	56553932	1.97621e-05	0.00838469	0.331
ENSG00000092841.14	MYL6	chr12	+	56553370	56553406	56553406	56553514	56552467	56552495	56554026	56554104	2.28911e-05	0.00938301	0.108
ENSG00000214046.4	SMIM7	chr19	-	16757930	16758072	16770205	16770258	16741853	16742535	16770769	16770877	2.39468e-05	0.00965215	0.054
ENSG00000135845.5	PIGC	chr1	-	172345693	172345776	172368958	172369056	172339328	172339451	172384433	172384466	2.4883e-05	0.00986508	0.418
ENSG00000131400.3	NAPSA	chr19	-	50864919	50865038	50865225	50865349	50864197	50864397	50865428	50865570	2.77502e-05	0.0108244	-0.461
ENSG00000092140.10	G2E3	chr14	+	31050281	31050322	31077093	31077275	31028328	31028478	31081412	31081585	2.99146e-05	0.0114834	-0.126
ENSG00000137474.15	MYO7A	chr11	+	76905398	76905569	76908525	76908643	76903095	76903323	76909539	76909666	3.07099e-05	0.0116045	-0.207
ENSG00000156535.9	CD109	chr6	+	74476481	74476583	74476670	74476733	74475652	74475877	74477777	74477954	3.1237e-05	0.0116221	-0.441
ENSG00000158006.9	PAFAH2	chr1	-	26315938	26316092	26317217	26317412	26314721	26314818	26324515	26324535	3.42014e-05	0.0125062	-0.059
ENSG00000106804.6	C5	chr9	-	123800158	123800229	123805281	123805444	123797080	123797172	123808468	123808661	3.46476e-05	0.0125062	0.122
ENSG00000130958.7	SLC35D2	chr9	-	99126745	99126832	99130553	99130587	99122435	99122503	99145758	99145964	3.588e-05	0.0127606	0.156
ENSG00000166747.8	AP1G1	chr16	-	71787735	71787790	71789921	71790062	71784112	71784235	71792710	71792824	3.81852e-05	0.0128551	-0.106
ENSG00000082074.11	FYB	chr5	-	39153549	39153706	39201927	39203089	39141196	39141243	39219544	39219675	3.98665e-05	0.0128551	-0.075
ENSG00000161526.10	SAP30BP	chr17	+	73686750	73686852	73687473	73687611	73667895	73667943	73689519	73689562	3.69469e-05	0.0128551	0.152
ENSG00000078403.12	MLLT10	chr10	+	21830191	21830290	21860903	21860955	21827761	21827841	21875222	21875277	3.75035e-05	0.0128551	0.193
ENSG00000145390.7	USP53	chr4	+	120156444	120156566	120160372	120161058	120138704	120138828	120166491	120166584	3.89744e-05	0.0128551	0.379
ENSG00000196083.5	IL1RAP	chr3	+	190345111	190345238	190347138	190347287	190341132	190341204	190362036	190362186	4.11638e-05	0.0130988	-0.086
ENSG00000150403.13	TMCO3	chr13	+	114193671	114193822	114202617	114202767	114188359	114188555	114203739	114204510	4.33077e-05	0.0131323	0.116
ENSG00000198625.8	MDM4	chr1	+	204507336	204507436	204511911	204512072	204501318	204501374	204515924	204516005	4.34413e-05	0.0131323	0.217
ENSG00000007341.14	ST7L	chr1	-	113134146	113134225	113140592	113140708	113124996	113125094	113153462	113153625	4.78361e-05	0.0139382	-0.275
ENSG00000092108.16	SCFD1	chr14	+	31169393	31169464	31203995	31204064	31163978	31164075	31204791	31204898	5.03635e-05	0.0139999	-0.139
ENSG00000144674.12	GOLGA4	chr3	+	37378633	37378654	37379156	37379225	37376543	37376657	37381614	37381690	5.00141e-05	0.0139999	0.168
ENSG00000186862.13	PDZD7	chr10	-	102771446	102771518	102771681	102771773	102770028	102770636	102771923	102772015	5.35438e-05	0.0145495	-0.077
ENSG00000240498.2	CDKN2B-AS1	chr9	+	22056250	22056386	22097256	22097363	22049104	22049227	22120198	22120409	5.30866e-05	0.0145495	0.094
ENSG00000112365.4	ZBTB24	chr6	-	109796601	109796685	109797377	109797461	109788855	109788937	109797965	109798133	6.10347e-05	0.0164007	0.166
ENSG00000127124.9	HIVEP3	chr1	-	42045407	42050989	42094419	42094618	42041214	42041360	42166586	42166666	6.73941e-05	0.0175254	-0.059
ENSG00000172113.4	NME6	chr3	-	48338216	48338319	48339916	48340013	48335590	48336293	48342785	48342848	6.70567e-05	0.0175254	0.14
ENSG00000250903.4	GMDS-AS1	chr6	+	2269931	2270033	2272049	2273651	2263834	2263918	2283732	2284008	6.87104e-05	0.0176776	0.112
ENSG00000185730.3	ZNF696	chr8	+	144372914	144373028	144375141	144375235	144371845	144371988	144377909	144378134	7.06128e-05	0.0177885	0.12
ENSG00000168958.15	MFF	chr2	+	228207460	228207535	228211941	228212100	228205007	228205096	228217229	228217289	8.57869e-05	0.0201424	-0.106
ENSG00000011376.5	LARS2	chr3	+	45488382	45488472	45500234	45500378	45461160	45461221	45515734	45515842	8.53417e-05	0.0201424	0.107
ENSG00000101901.6	ALG13	chrX	+	110954902	110954953	110955711	110955758	110932314	110932425	110956452	110956525	8.44877e-05	0.0201424	0.144
ENSG00000272162.1	RP11-637O19.3	chr6	+	10903107	10903196	10907774	10907917	10902909	10902995	10910380	10910433	8.50885e-05	0.0201424	0.195
ENSG00000170919.11	TPT1-AS1	chr13	+	45918888	45919044	45944214	45944317	45918513	45918581	45951195	45951350	9.64368e-05	0.0222117	0.116
ENSG00000115568.11	ZNF142	chr2	-	219520872	219521186	219523702	219523853	219516423	219516545	219524091	219524225	0.000103498	0.0233924	-0.071
ENSG00000140987.15	ZSCAN32	chr16	-	3434458	3434941	3440009	3440183	3432084	3433711	3440422	3440517	0.000107848	0.0234972	0.106
ENSG00000197555.5	SIPA1L1	chr14	+	71867510	71867635	71880664	71880731	71787838	71787898	71979459	71979562	0.000107131	0.0234972	0.146
ENSG00000137338.4	PGBD1	chr6	+	28251532	28251986	28253327	28253484	28249348	28249695	28254856	28254945	0.000109683	0.0236836	0.194
ENSG00000273345.1	CTD-2410N18.4	chr5	-	133643828	133644157	133655048	133655188	133642299	133642393	133657481	133657594	0.000111913	0.0239514	0.134
ENSG00000167380.12	ZNF226	chr19	+	44670857	44671035	44671971	44672013	44669909	44669960	44674187	44674248	0.000121394	0.0251311	-0.23
ENSG00000140694.12	PARN	chr16	-	14652229	14652346	14672387	14672485	14649542	14649566	14674730	14674800	0.000121582	0.0251311	0.235
ENSG00000127527.9	EPS15L1	chr19	-	16472589	16472795	16487932	16488065	16466049	16466662	16495939	16496022	0.000126518	0.0252869	-0.108
ENSG00000197037.6	ZSCAN25	chr7	+	99216147	99216274	99218995	99219197	99214570	99214612	99220171	99220263	0.000125455	0.0252869	-0.088
ENSG00000144395.13	CCDC150	chr2	+	197531442	197531572	197534556	197534600	197530290	197530407	197537068	197537161	0.00012575	0.0252869	0.194
ENSG00000029153.10	ARNTL2	chr12	+	27540160	27540253	27542111	27542229	27538413	27538493	27543028	27543172	0.00015373	0.0304738	0.267
ENSG00000009830.7	POMT2	chr14	-	77765031	77765114	77769177	77769286	77762506	77762616	77771034	77771143	0.000177003	0.0345213	-0.14
ENSG00000125386.10	FAM193A	chr4	+	2709872	2709995	2717048	2717220	2701406	2702271	2717749	2717831	0.000181803	0.0351738	0.325
ENSG00000239665.4	RP11-295P9.3	chr10	+	13690619	13690768	13694845	13694882	13690084	13690230	13696352	13696427	0.000190362	0.0356378	-0.24
ENSG00000162604.8	TM2D1	chr1	-	62149088	62149218	62160368	62160442	62146717	62147022	62166605	62166697	0.000191569	0.0356378	-0.115
ENSG00000138028.10	CGREF1	chr2	-	27324655	27324756	27324882	27325089	27323283	27323410	27325393	27325459	0.000193746	0.0357676	0.176
ENSG00000242612.2	DECR2	chr16	+	455512	455665	456684	456952	454955	455024	457424	457560	0.0002016	0.0369355	0.27
ENSG00000100084.10	HIRA	chr22	-	19343752	19343811	19346858	19347007	19343282	19343388	19348759	19348864	0.00021701	0.0391654	-0.082
ENSG00000157693.10	C9orf91	chr9	+	117389175	117389286	117390380	117390530	117386629	117386739	117396047	117396158	0.000222224	0.0395167	0.073
ENSG00000116991.6	SIPA1L2	chr1	-	232551239	232551371	232561334	232561554	232539193	232539317	232564156	232564310	0.000221925	0.0395167	0.213
ENSG00000168958.15	MFF	chr2	+	228207460	228207535	228211941	228212100	228205007	228205096	228220392	228220477	0.000232465	0.0404456	-0.12
ENSG00000174928.11	C3orf33	chr3	-	155493489	155493637	155523385	155523512	155485297	155485458	155523927	155524040	0.000235073	0.0406072	0.217
ENSG00000130997.12	POLN	chr4	-	2158514	2158580	2159584	2159638	2132959	2133017	2160881	2160938	0.000237382	0.0407152	0.39
ENSG00000180376.12	CCDC66	chr3	+	56605208	56605330	56626997	56627129	56600977	56601081	56627518	56627769	0.000239511	0.0407245	-0.149
ENSG00000123106.6	CCDC91	chr12	+	28378727	28378794	28412296	28412375	28343378	28343574	28458581	28458739	0.00024108	0.0407245	0.1
ENSG00000269640.1	CTD-2521M24.9	chr19	+	17523905	17523913	17524029	17524114	17516885	17517105	17525199	17525277	0.000260232	0.042238	0.051
ENSG00000110455.9	ACCS	chr11	+	44092805	44092865	44094996	44095085	44089177	44089465	44096161	44096231	0.000257358	0.042238	0.058
ENSG00000240498.2	CDKN2B-AS1	chr9	+	22056250	22056386	22112318	22112394	22049104	22049227	22118642	22118766	0.000258922	0.042238	0.076
ENSG00000073605.14	GSDMB	chr17	-	38063213	38063240	38064428	38064467	38062363	38062524	38065210	38065295	0.000264327	0.0426166	-0.446
ENSG00000214954.4	LRRC69	chr8	+	92147895	92147967	92201749	92201851	92145337	92145533	92212840	92213020	0.000270547	0.0430455	0.29
ENSG00000142188.12	TMEM50B	chr21	-	34828033	34828091	34832719	34832812	34821088	34823170	34837648	34837716	0.000276545	0.0437121	0.102
ENSG00000100354.16	TNRC6B	chr22	+	40513058	40513132	40521775	40521866	40440820	40441002	40552118	40552186	0.000287347	0.0449336	-0.141
ENSG00000172456.12	FGGY	chr1	+	59811918	59812070	59844420	59844509	59787207	59787422	59922632	59922748	0.000291212	0.0451453	-0.086
ENSG00000143452.11	HORMAD1	chr1	-	150681369	150681437	150684020	150684047	150679028	150679285	150684308	150684329	0.000294353	0.0452367	-0.075
ENSG00000197208.5	SLC22A4	chr5	+	131649306	131649461	131662969	131663096	131647853	131647957	131667448	131667543	0.000295542	0.0452367	0.191
ENSG00000162419.8	GMEB1	chr1	+	29010094	29010252	29016585	29016698	28995291	28995351	29018096	29018221	0.000309855	0.0454153	-0.1
ENSG00000133816.9	MICAL2	chr11	+	12262586	12262709	12277189	12277297	12260982	12261132	12278331	12278518	0.000308402	0.0454153	0.106
ENSG00000253203.2	GUSBP3	chr5	-	68938031	68938116	68941708	68941896	68935285	68936193	68974971	68975086	0.000304335	0.0454153	0.309
ENSG00000165138.12	ANKS6	chr9	-	101518701	101518885	101533177	101533328	101513310	101513378	101536158	101536362	0.000323689	0.0468748	-0.147
ENSG00000142920.12	ADC	chr1	+	33558882	33559017	33560148	33560314	33546988	33547109	33562307	33562462	0.000322189	0.0468748	0.16

## Sheet: DMSO L22KO vs NT RI
GeneID	geneSymbol	chr	strand	riExonStart_0base	riExonEnd	upstreamES	upstreamEE	downstreamES	downstreamEE	PValue	FDR	IncLevelDifference
ENSG00000267796.3	LIN37	chr19	+	36245146	36245420	36245146	36245220	36245293	36245420	8.87229e-10	3.95526e-06	-0.072
ENSG00000079337.11	RAPGEF3	chr12	-	48142236	48142714	48142236	48142325	48142601	48142714	1.15776e-08	2.58064e-05	0.615
ENSG00000151651.11	ADAM8	chr10	-	135086757	135087342	135086757	135086934	135087265	135087342	4.01219e-08	4.72769e-05	-0.354
ENSG00000025708.8	TYMP	chr22	-	50964429	50964905	50964429	50964585	50964674	50964905	5.30248e-08	4.72769e-05	-0.1
ENSG00000157873.13	TNFRSF14	chr1	+	2489781	2491417	2489781	2489907	2491261	2491417	2.31227e-07	0.000171802	-0.08
ENSG00000165525.13	NEMF	chr14	-	50251642	50252038	50251642	50251722	50251937	50252038	2.89616e-07	0.000184444	0.119
ENSG00000163479.9	SSR2	chr1	-	155981600	155982356	155981600	155981678	155982175	155982356	3.56274e-07	0.000198534	-0.116
ENSG00000206149.6	HERC2P9	chr15	+	28900418	28900837	28900418	28900566	28900640	28900837	4.74355e-07	0.000234964	0.233
ENSG00000061273.13	HDAC7	chr12	-	48177861	48179254	48177861	48178000	48179169	48179254	1.60083e-06	0.000594707	-0.139
ENSG00000228300.9	C19orf24	chr19	+	1276091	1277298	1276091	1276672	1277181	1277298	2.58362e-06	0.0008227	0.102
ENSG00000106003.8	LFNG	chr7	+	2564852	2565201	2564852	2564952	2565047	2565201	4.59629e-06	0.0013624	-0.151
ENSG00000158517.9	NCF1	chr7	+	74197281	74197975	74197281	74197404	74197867	74197975	6.03966e-06	0.00158381	0.065
ENSG00000116774.7	OLFML3	chr1	+	114522953	114524876	114522953	114523239	114523570	114524876	8.48673e-06	0.00171972	-0.442
ENSG00000111801.11	BTN3A3	chr6	+	26448475	26448982	26448475	26448676	26448955	26448982	8.01327e-06	0.00171972	-0.358
ENSG00000100889.7	PCK2	chr14	+	24563519	24564054	24563519	24563643	24563974	24564054	7.9649e-06	0.00171972	-0.135
ENSG00000100417.7	PMM1	chr22	-	41979962	41980376	41979962	41980062	41980284	41980376	7.56136e-06	0.00171972	-0.069
ENSG00000108641.10	B9D1	chr17	-	19246482	19247170	19246482	19246774	19247102	19247170	8.20381e-06	0.00171972	0.142
ENSG00000110697.8	PITPNM1	chr11	-	67263648	67264907	67263648	67263816	67264701	67264907	1.15406e-05	0.00223687	-0.174
ENSG00000133466.9	C1QTNF6	chr22	-	37576206	37578775	37576206	37576907	37578191	37578775	1.43842e-05	0.0024612	0.242
ENSG00000108641.10	B9D1	chr17	-	19246482	19247170	19246482	19246808	19247102	19247170	1.6956e-05	0.00269963	0.286
ENSG00000188130.9	MAPK12	chr22	-	50694043	50694628	50694043	50694123	50694513	50694628	3.1563e-05	0.00439712	0.069
ENSG00000181027.6	FKRP	chr19	+	47251771	47252141	47251771	47251922	47252031	47252141	3.44562e-05	0.00465472	0.173
ENSG00000110697.8	PITPNM1	chr11	-	67263648	67264907	67263648	67263819	67264701	67264907	3.74552e-05	0.00491103	-0.069
ENSG00000089280.14	FUS	chr16	+	31196259	31199678	31196259	31196500	31199645	31199678	4.99112e-05	0.00585974	-0.052
ENSG00000154222.10	CC2D1B	chr1	-	52823452	52824133	52823452	52823570	52824002	52824133	6.44372e-05	0.00700636	0.087
ENSG00000065357.15	DGKA	chr12	+	56333198	56333954	56333198	56333313	56333865	56333954	8.06101e-05	0.00855618	-0.173
ENSG00000118308.10	LRMP	chr12	+	25232331	25232697	25232331	25232396	25232635	25232697	9.11084e-05	0.00929509	-0.142
ENSG00000145020.10	AMT	chr3	-	49456403	49456838	49456403	49456584	49456692	49456838	9.17416e-05	0.00929509	0.243
ENSG00000110455.9	ACCS	chr11	+	44099394	44100334	44099394	44099472	44100233	44100334	9.56811e-05	0.00947881	-0.173
ENSG00000196684.8	HSH2D	chr19	+	16263361	16264018	16263361	16263451	16263841	16264018	0.000102716	0.00995452	-0.199
ENSG00000003509.11	NDUFAF7	chr2	+	37468720	37469836	37468720	37468780	37469777	37469836	0.00011373	0.0107874	-0.059
ENSG00000033030.9	ZCCHC8	chr12	-	122967825	122968110	122967825	122967891	122968006	122968110	0.000134391	0.0119823	0.065
ENSG00000157353.12	FUK	chr16	+	70500784	70501869	70500784	70501374	70501788	70501869	0.000137114	0.0119854	0.177
ENSG00000073350.9	LLGL2	chr17	+	73570293	73570749	73570293	73570341	73570690	73570749	0.000183907	0.01483	-0.106
ENSG00000100167.15	SEPT3	chr22	+	42390624	42394225	42390624	42390718	42392905	42394225	0.000174176	0.01483	0.13
ENSG00000168291.8	PDHB	chr3	-	58415434	58415965	58415434	58415668	58415854	58415965	0.000184652	0.01483	0.138
ENSG00000244687.7	UBE2V1	chr20	-	48732021	48732491	48732021	48732158	48732235	48732491	0.000207728	0.016166	-0.066
ENSG00000039523.13	FAM65A	chr16	+	67574360	67574607	67574360	67574404	67574454	67574607	0.000210325	0.016166	0.115
ENSG00000002016.12	RAD52	chr12	-	1038929	1039310	1038929	1039052	1039216	1039310	0.000216111	0.0163292	-0.096
ENSG00000205593.7	DENND6B	chr22	-	50752242	50752701	50752242	50752307	50752635	50752701	0.000226577	0.0168346	-0.061
ENSG00000106077.14	ABHD11	chr7	-	73151550	73152065	73151550	73151690	73151891	73152065	0.000237284	0.0173412	-0.061
ENSG00000164877.14	MICALL2	chr7	-	1477732	1477989	1477732	1477856	1477924	1477989	0.000312355	0.0217575	-0.154
ENSG00000164463.8	CREBRF	chr5	+	172535626	172537714	172535626	172535821	172537524	172537714	0.000326158	0.0223694	-0.073
ENSG00000113108.13	APBB3	chr5	-	139941171	139941812	139941171	139941286	139941684	139941812	0.000335688	0.0226742	-0.098
ENSG00000187860.6	CCDC157	chr22	+	30766314	30767716	30766314	30766939	30767638	30767716	0.00036584	0.0241769	-0.106
ENSG00000115042.5	FAHD2A	chr2	+	96076274	96076774	96076274	96076334	96076611	96076774	0.000377461	0.0243873	-0.056
ENSG00000171953.11	ATPAF2	chr17	-	17924436	17924977	17924436	17924552	17924735	17924977	0.000450645	0.0275588	-0.202
ENSG00000213930.7	GALT	chr9	+	34647085	34648168	34647085	34647255	34648111	34648168	0.000464139	0.0275588	-0.081
ENSG00000196535.10	MYO18A	chr17	-	27423778	27424368	27423778	27423933	27424240	27424368	0.000469822	0.0275588	-0.052
ENSG00000114745.9	GORASP1	chr3	-	39142237	39142593	39142237	39142368	39142506	39142593	0.000492434	0.0276712	-0.098
ENSG00000166165.8	CKB	chr14	-	103988154	103988514	103988154	103988287	103988359	103988514	0.000483658	0.0276712	-0.094
ENSG00000100299.13	ARSA	chr22	-	51065018	51065834	51065018	51065188	51065593	51065834	0.000496568	0.0276712	-0.091
ENSG00000213930.7	GALT	chr9	+	34647488	34647958	34647488	34647564	34647828	34647958	0.000487848	0.0276712	-0.06
ENSG00000241370.1	RPP21	chr6	+	30313074	30314334	30313074	30313175	30314208	30314334	0.000507694	0.0279419	0.251
ENSG00000177380.9	PPFIA3	chr19	+	49653336	49654278	49653336	49653408	49653492	49654278	0.000546098	0.0293314	0.088
ENSG00000100023.13	PPIL2	chr22	+	22049225	22049785	22049225	22049359	22049686	22049785	0.000608299	0.0317856	-0.178
ENSG00000167595.10	C19orf55	chr19	+	36258704	36258967	36258704	36258938	36258942	36258967	0.000632713	0.0317856	0.269
ENSG00000159314.7	ARHGAP27	chr17	-	43481966	43482472	43481966	43482047	43482393	43482472	0.0007292	0.0341655	-0.069
ENSG00000225177.1	RP11-390P2.4	chr6	+	139017733	139018425	139017733	139017892	139018039	139018425	0.000743395	0.0341655	0.294
ENSG00000214941.3	ZSWIM7	chr17	-	15879873	15881477	15879873	15880406	15881357	15881477	0.000778273	0.0354035	-0.082
ENSG00000130813.13	C19orf66	chr19	+	10201925	10202306	10201925	10202029	10202151	10202306	0.000795676	0.0358295	-0.149
ENSG00000111665.7	CDCA3	chr12	-	6958486	6959022	6958486	6958577	6958728	6959022	0.00084242	0.0375551	0.128
ENSG00000144635.4	DYNC1LI1	chr3	-	32571775	32574589	32571775	32571820	32574477	32574589	0.000860865	0.0379974	-0.103
ENSG00000072135.8	PTPN18	chr2	+	131128129	131128355	131128129	131128196	131128277	131128355	0.000911981	0.0398589	-0.092
ENSG00000162062.10	C16orf59	chr16	+	2510145	2510694	2510145	2510382	2510623	2510694	0.00102253	0.0438312	-0.101
ENSG00000157379.9	DHRS1	chr14	-	24761389	24761990	24761389	24761536	24761857	24761990	0.0010581	0.0445001	-0.154
ENSG00000129667.8	RHBDF2	chr17	-	74468767	74469187	74468767	74468921	74469086	74469187	0.00109503	0.0450757	-0.075
ENSG00000171777.11	RASGRP4	chr19	-	38901754	38902021	38901754	38901889	38901984	38902021	0.00110212	0.0450757	0.069
ENSG00000114026.17	OGG1	chr3	+	9798450	9798875	9798450	9798500	9798727	9798875	0.00115758	0.0454335	-0.071
ENSG00000111653.15	ING4	chr12	-	6761436	6761936	6761436	6761475	6761827	6761936	0.00116183	0.0454335	0.055
ENSG00000225163.3	LINC00618	chr14	+	97411385	97411731	97411385	97411487	97411574	97411731	0.0011218	0.0454335	0.194
ENSG00000226287.3	TMEM191A	chr22	+	21057920	21058328	21057920	21058039	21058255	21058328	0.00120123	0.0465658	0.136
ENSG00000115183.9	TANC1	chr2	+	160075748	160076378	160075748	160075872	160076202	160076378	0.00124897	0.0479994	0.202

[truncated: 10 more sheets: C16 L22KO vs NT A3SS, C16 L22KO vs NT A5SS, C16 L22KO vs NT SE, C16 L22KO vs NT MXE, C16 L22KO vs NT RI, L22KO C16 vs DM A3SS, L22KO C16 vs DM A5SS, L22KO C16 vs DM SE, L22KO C16 vs DM MXE, L22KO C16 vs DM RI]
